# Supplementary material for: Harnessing sulfur and nitrogen in the cobalt(iii)-catalyzed unsymmetrical double annulation of thioamides: probing the origin of chemo- and regio-selectivity
Source: Royal Society of Chemistry journal article supplement (doi:10.1039/d1sc00765c), 2021-01-01

# Harnessing Sulfur and Nitrogen in the Cobalt (III)-Catalyzed Unsymmetrical Double Annulation of Thioamides: Probing the Origin of Chemo- and Regioselectivity

Majji Shankar<sup>†</sup>, Arijit Saha<sup>†</sup>, Somratan Sau<sup>†</sup>, Arghadip Ghosh<sup>†</sup>, Vincent Gandon,<sup>‡\*\*</sup> and  
Akhila K. Sahoo<sup>†\*</sup>

[<sup>†</sup>] Majji Shankar, Arijit Saha, Somratan Sau, Arghadip Ghosh, and Prof. Akhila K. Sahoo, School of Chemistry, University of Hyderabad, Hyderabad (India); E-mail: [akhilchemistry12@gmail.com](mailto:akhilchemistry12@gmail.com) / [akssc@uohyd.ac.in](mailto:akssc@uohyd.ac.in)

[<sup>‡</sup>] Dr. Vincent Gandon, Institut de Chimie Moléculaire et des Matériaux d'Orsay, CNRS UMR 8182, Université Paris-Saclay, Bâtiment 420, 91405 Orsay cedex (France); E-mail: [vincent.gandon@universite-paris-saclay.fr](mailto:vincent.gandon@universite-paris-saclay.fr)

[<sup>\*</sup>] Laboratoire de Chimie Moléculaire (LCM), CNRS UMR 9168, Ecole Polytechnique, Institut Polytechnique de Paris, route de Saclay, 91128 Palaiseau cedex (France)

## SUPPORTING INFORMATION

| <b>Table of Contents</b>                              | <b>Page</b> |
|-------------------------------------------------------|-------------|
| General Experimental Methods                          | S2          |
| Materials                                             | S3–S4       |
| Experimental Procedures, Spectral and Analytical data | S4–S56      |
| Photophysical Properties                              | S56–S57     |
| X-ray crystal structure and data                      | S57–S58     |
| DFT Studies                                           | S58–S82     |
| References                                            | S82–S83     |
| NMR data                                              | S84–340     |

## General Experimental Methods

All the reactions were performed in an oven-dried Schlenk flask. Commercial grade solvents were distilled prior to use. Column chromatography was performed using either 100-200 Mesh or 230-400 Mesh silica gel or neutral alumina. Thin layer chromatography (TLC) was performed on silica gel GF254 plates and alumina plates.

Proton, carbon, and fluorine nuclear magnetic resonance spectra ( $^1\text{H}$  NMR,  $^{13}\text{C}$  NMR and  $^{19}\text{F}$  NMR) were recorded based on the resonating frequencies as follows: ( $^1\text{H}$  NMR, 400 MHz;  $^{13}\text{C}$  NMR, 101 MHz;  $^{19}\text{F}$  NMR, 376 MHz), ( $^1\text{H}$  NMR, 500 MHz;  $^{13}\text{C}$  NMR, 126 MHz;  $^{19}\text{F}$  NMR, 470 MHz) and ( $^1\text{H}$  NMR, 600 MHz;  $^{13}\text{C}$  NMR, 150 MHz) having the solvent resonance as internal standard ( $^1\text{H}$  NMR,  $\text{CDCl}_3$  at 7.26 ppm;  $^{13}\text{C}$  NMR,  $\text{CDCl}_3$  at 77.0 ppm). In a few cases, tetramethylsilane (TMS) was used as reference standard at 0.00 ppm. Data for  $^1\text{H}$  NMR are reported as follows: chemical shift (ppm), multiplicity (s = singlet; bs = broad singlet; d = doublet; bd = broad doublet, t = triplet; bt = broad triplet; q = quartet; m = multiplet), coupling constants,  $J$ , in (Hz), and integration. Data for  $^{13}\text{C}$  NMR and  $^{19}\text{F}$  NMR are reported in terms of chemical shift (ppm). IR spectra are reported in  $\text{cm}^{-1}$ . High resolution mass spectra were obtained in ESI mode in Maxis-TOF analyzer. Melting points were determined by electro-thermal heating and are uncorrected. X-ray data was collected at 293 K using graphite monochromated Mo- $K\alpha$  radiation (0.71073 Å).

**Materials:** Unless otherwise noted, all the reagents and intermediates were obtained commercially and used without purification. Dichloromethane (DCM), methanol (MeOH), acetonitrile ( $\text{CH}_3\text{CN}$ ), toluene, dimethoxyethane (DME), tetrachloroethylene (TCE), 1,4-dioxane, 1,1,1,3,3,3-hexafluoro-2-propanol (HFIP) and 1,2-dichloroethane (DCE) were distilled over  $\text{CaH}_2$ .  $\text{AgSbF}_6$ ,  $\text{AgBF}_4$ ,  $\text{NaPF}_6$ ,  $\text{KPF}_6$ ,  $[\text{RuCl}_2(p\text{-cymene})]_2$ , and  $[\text{Cp}^*\text{RhCl}_2]_2$  were purchased and used as received. Analytical and spectral data of all the known compounds are exactly matching with the reported values. The complex  $[\text{Cp}^*\text{Co}(\text{CO})\text{I}_2]$  was prepared following the known procedure.<sup>1</sup> Compounds **1'**, **1'aa**, **1'bb**, and **7'** were prepared following known procedures.<sup>2</sup> The symmetrical alkynes **2b–n**, **2s** and **2v** were synthesized following reported procedures.<sup>3</sup> Analytical and spectral data of these compounds are exactly matching with the reported values. Diphenyl acetylene (**2a**), 1-phenyl-1-propyne (**2l**), phenylacetylene (**2m**), 2-butyne (**2o**), 3-hexyne (**2p**), 4-octyne (**2q**), 5-decyne (**2r**), dimethyl acetylenedicarboxylate (**2t**) and 1-phenyl-2-trimethylsilylacetylene (**2u**) were purchased and used as received.

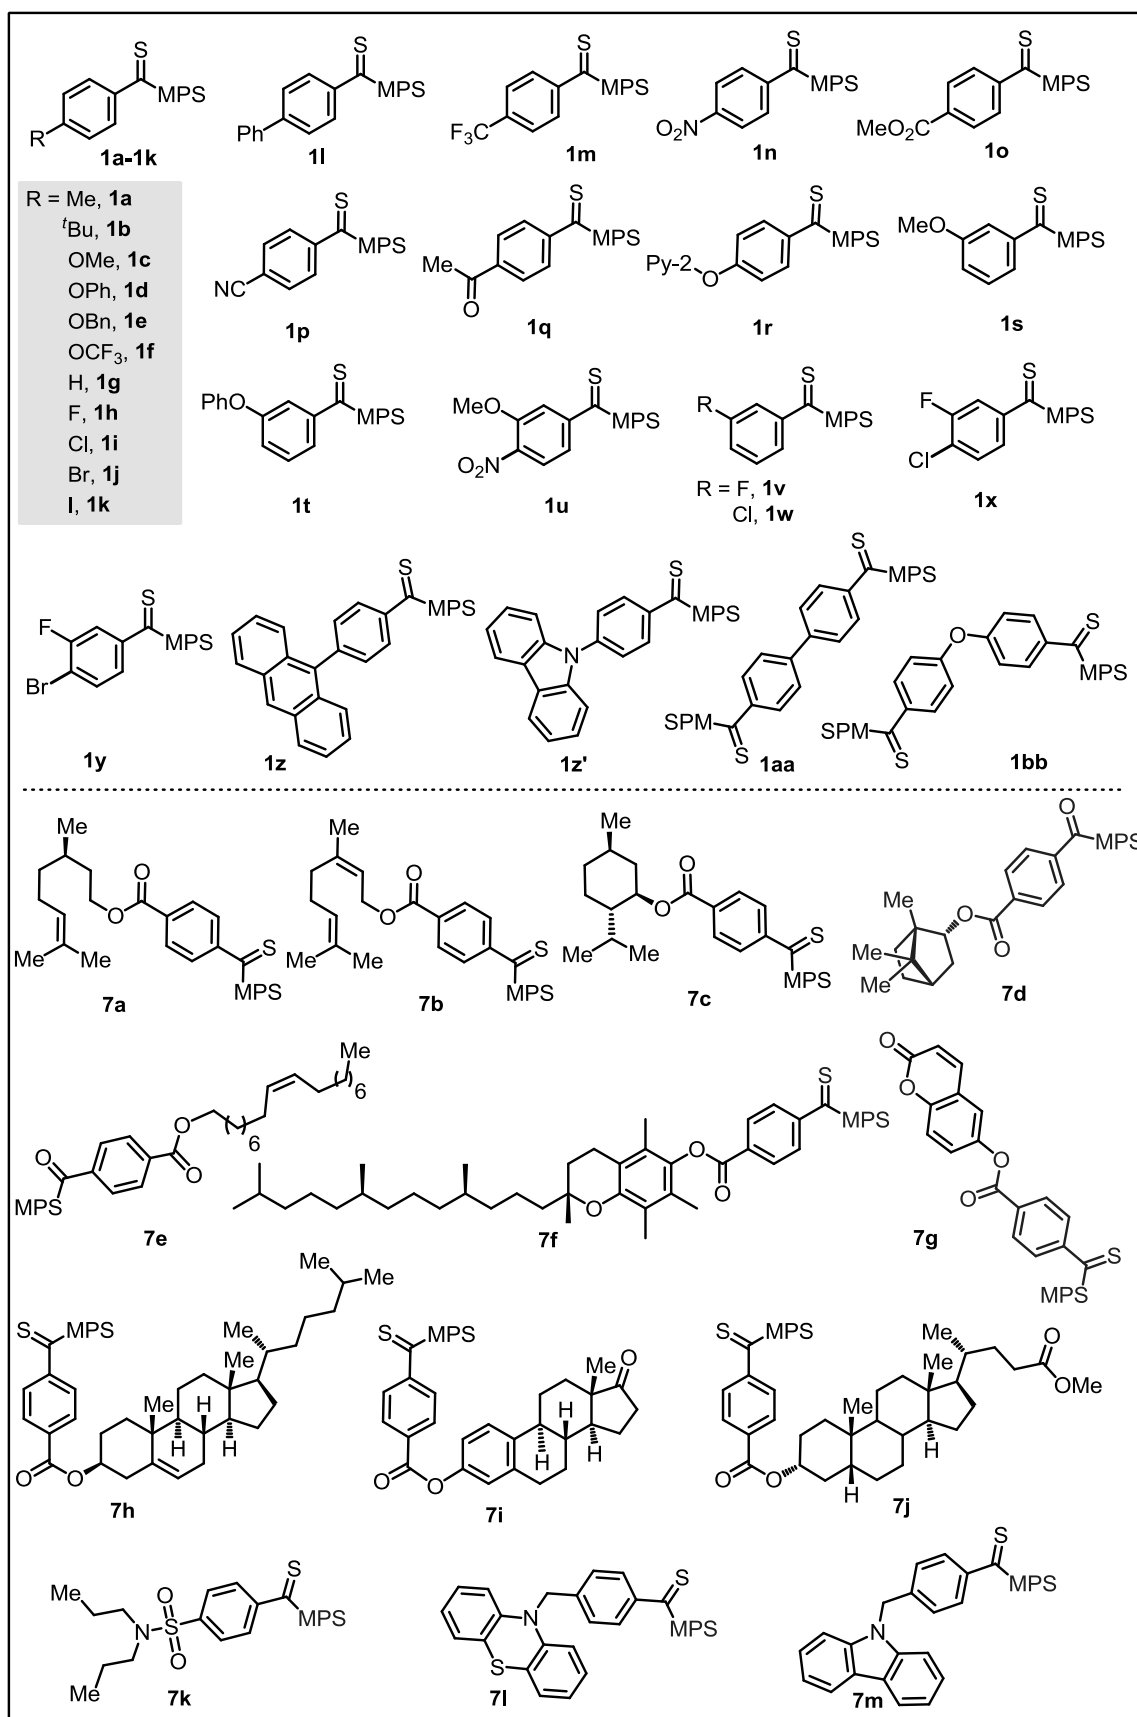

**Figure S1:** List of *N*-[arenethioyl]-*S*-Methyl-*S*-Phenylsulfoximine (**1** & **7**).

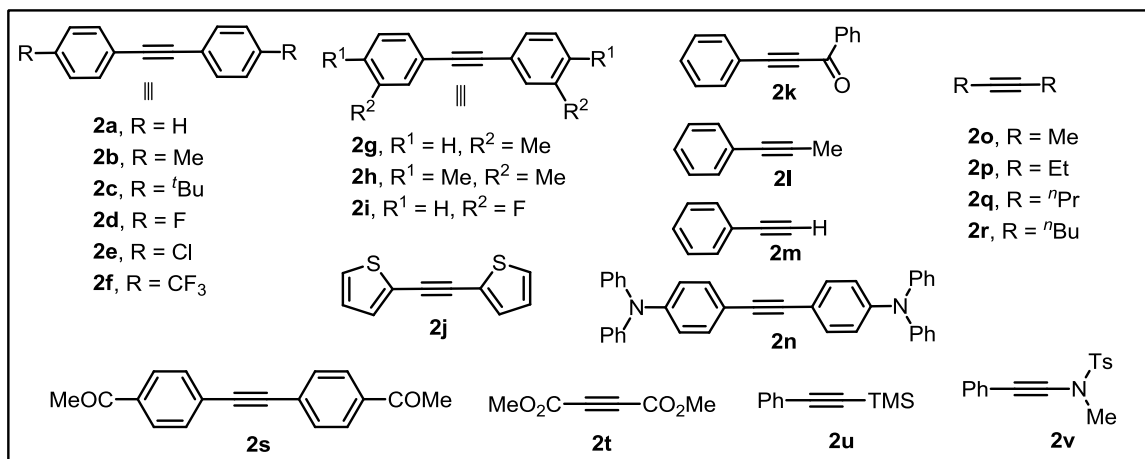

**Figure S2:** List of alkynes **2**.

### **Experimental Procedures:**

#### **Preparation of *N*-[arenethioyl]-*S*-Methyl-*S*-Phenylsulfoximine (**1**): General Procedure (GP-1):<sup>2</sup>**

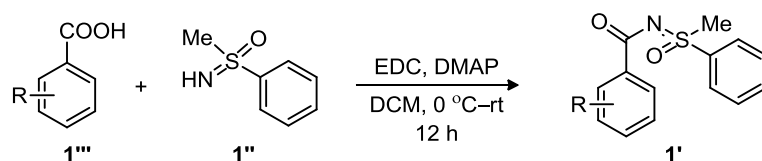

#### **Step-I**

A solution of *N*-(3-dimethylaminopropyl)-*N*-ethylcarbodiimide, hydrochloride salt (EDC·HCl) (2.0 equiv), 4-*N,N*-dimethylaminopyridine (DMAP) (2.2 equiv) and benzoic acids (**1'''**) (1.1 equiv) in CH<sub>2</sub>Cl<sub>2</sub> (5.0 mL, for 1.0 mmol of sulfoximine) was stirred under an argon atmosphere. Sulfoximine (**1''**) (1.0 equiv, 0.50 g) was introduced dropwise at 0 °C. The resulting reaction mixture was stirred for about 1 h at 0 °C and then 12 h at ambient temperature. Upon complete consumption of sulfoximine, the reaction mixture was acidified with hydrochloric acid (HCl, 2N). The organic layer was separated; the aqueous layer was extracted with CH<sub>2</sub>Cl<sub>2</sub> (3 times). The combined extracts were washed with 10% aqueous NaHCO<sub>3</sub> and brine. The organic layer was dried over Na<sub>2</sub>SO<sub>4</sub>. Solvent was filtered and evaporated under reduced pressure. The crude residue was purified using column chromatography on silica gel using hexane/ethyl acetate.<sup>2</sup>



## Step-II:

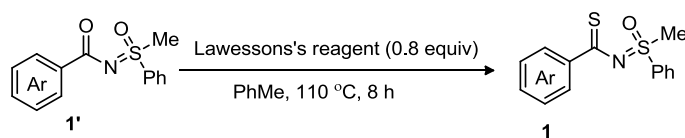

The oven dried reaction tube was charged with *N*-arylated-MPS (**1'**; 1.0 equiv, 0.5 g) and Lawesson's reagent (0.8 equiv). The reaction tube was evacuated and dry toluene (10 mL) was added and the resulting mixture was stirred at 110 °C for 8 h. Progress of the reaction was monitored by TLC. After complete consumption of **1'**, the reaction mixture was cooled to room temperature. The solvents were evaporated under the reduced pressure and the crude material was extracted with ethylacetate (3 × 10 mL). The organic layer was dried over Na<sub>2</sub>SO<sub>4</sub>. Solvent was filtered and evaporated under the reduced pressure. The crude residue was purified over a small pad of silica gel using hexane/ethyl acetate (2:3) to provide **1**. The freshly prepared compounds **1** were used for annulations. The compounds **1** were stored under inert conditions at -20 °C.<sup>4a</sup>

### *N*-[4-Methylbenzothioyl]-*S*-methyl-*S*-phenylsulfoximine (**1a**):

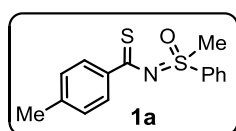

**1a** (401 mg, 76%); yellow crystalline solid;  $R_f = 0.57$  (1:1 hexane/EtOAc); <sup>1</sup>H NMR (500 MHz, CDCl<sub>3</sub>)  $\delta$  8.26 (d,  $J = 8.5$  Hz, 2H), 7.96 (d,  $J = 8.0$  Hz, 2H), 7.64 (bt,  $J = 7.0$  Hz, 1H), 7.57 (bt,  $J = 7.5$  Hz, 2H), 7.15 (d,  $J = 8.0$  Hz, 2H), 3.46 (s, 3H), 2.37 (s, 3H); <sup>13</sup>C {<sup>1</sup>H} NMR (126 MHz, CDCl<sub>3</sub>)  $\delta$  210.8, 142.6, 139.7, 137.4, 133.5, 129.7, 128.3, 128.2, 127.3, 44.6, 21.4; IR (Neat)  $\nu_{\max}$  2921, 1602, 1446, 1319, 1309, 1220, 1172, 1090, 1027 cm<sup>-1</sup>; **HRMS (ESI)** for C<sub>15</sub>H<sub>15</sub>NNaOS<sub>2</sub> (M+Na)<sup>+</sup>: calcd. 312.0487, found 312.0490.

### *N*-[4-(Tertbutyl)benzothioyl]-*S*-methyl-*S*-phenylsulfoximine (**1b**):

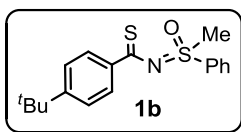

**1b** (390 mg, 75%); yellow solid;  $R_f = 0.48$  (7:3 hexane/EtOAc); <sup>1</sup>H NMR (400 MHz, CDCl<sub>3</sub>)  $\delta$  8.28 (dt,  $J = 8.8$  & 2.0 Hz, 2H), 8.01–7.97 (m, 2H), 7.70–7.63 (m, 1H), 7.63–7.58 (m, 2H), 7.38 (dt,  $J = 8.8$  & 2.2 Hz, 2H), 3.48 (s, 3H), 1.33 (s, 9H); <sup>13</sup>C {<sup>1</sup>H} NMR (400 MHz, CDCl<sub>3</sub>)  $\delta$  211.0, 155.6, 139.8, 137.6, 133.6, 129.7, 128.0, 127.4, 124.7, 44.7, 34.9, 31.1; IR (Neat)  $\nu_{\max}$  2951, 1601, 1410, 1317, 1276, 1233, 1206, 1172, 1108, 1004, 956 cm<sup>-1</sup>; **HRMS (ESI)** for C<sub>18</sub>H<sub>22</sub>NOS<sub>2</sub> (M+H)<sup>+</sup>: calcd. 332.1137, found 332.1143.

### ***N*-[4-Methoxybenzothioyl]-*S*-methyl-*S*-phenylsulfoximine (**1c**):**

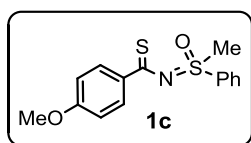

**1c** (390 mg, 74%); yellow crystalline solid;  $R_f = 0.42$  (3:2 hexane/EtOAc);  $^1\text{H}$  NMR (400 MHz,  $\text{CDCl}_3$ )  $\delta$  8.37 (d,  $J = 7.2$  Hz, 2H), 7.97 (d,  $J = 6.0$  Hz, 2H), 7.66 (t,  $J = 5.8$  Hz, 1H), 7.59 (t,  $J = 6.0$  Hz, 2H), 6.85 (d,  $J = 7.2$  Hz, 2H), 3.85 (s, 3H), 3.48 (s, 3H);  $^{13}\text{C}\{^1\text{H}\}$  NMR (101 MHz,  $\text{CDCl}_3$ )  $\delta$  209.7, 163.2, 137.9, 135.5, 133.5, 130.4, 129.7, 127.4, 112.8, 55.4, 44.7; IR (Neat)  $\nu_{\text{max}}$  3001, 2918, 1594, 1474, 1417, 1301, 1157, 970  $\text{cm}^{-1}$ ; **HRMS (ESI)** for  $\text{C}_{15}\text{H}_{16}\text{NO}_2\text{S}_2$  ( $\text{M}+\text{H}$ ) $^+$ : calcd. 306.0617, found 306.0632.

### ***N*-[4-Phenoxybenzothioyl]-*S*-methyl-*S*-phenylsulfoximine (**1d**):**

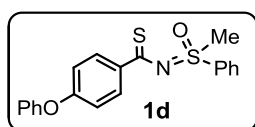

**1d** (381 mg, 73%); yellow crystalline solid;  $R_f = 0.45$  (3:2 hexane/EtOAc);  $^1\text{H}$  NMR (400 MHz,  $\text{CDCl}_3$ )  $\delta$  8.37 (d,  $J = 7.2$  Hz, 2H), 7.97 (d,  $J = 6.0$  Hz, 2H), 7.66 (bt,  $J = 5.8$  Hz, 1H), 7.59 (bt,  $J = 6.2$  Hz, 2H), 7.37 (bt,  $J = 6.6$  Hz, 2H), 7.17 (t,  $J = 6.0$  Hz, 1H), 7.06 (d,  $J = 6.0$  Hz, 2H), 6.92 (d,  $J = 7.2$  Hz, 2H), 3.47 (s, 3H);  $^{13}\text{C}\{^1\text{H}\}$  NMR (101 MHz,  $\text{CDCl}_3$ )  $\delta$  209.6, 161.2, 155.9, 137.4, 137.1, 133.6, 130.3, 129.8, 129.7, 127.3, 124.1, 119.7, 116.7, 44.7; IR (Neat)  $\nu_{\text{max}}$  3363, 3192, 1651, 1572, 1508, 1486, 1322, 1248, 1140  $\text{cm}^{-1}$ ; **HRMS (ESI)** for  $\text{C}_{20}\text{H}_{18}\text{NO}_2\text{S}_2$  ( $\text{M}+\text{H}$ ) $^+$ : calcd. 368.0773, found 368.0775.

### ***N*-[4-(Benzyloxy)benzothioyl]-*S*-methyl-*S*-phenylsulfoximine (**1e**):**

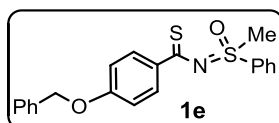

**1e** (376 mg, 72%); yellow crystalline solid;  $R_f = 0.54$  (1:1 hexane/EtOAc);  $^1\text{H}$  NMR (400 MHz,  $\text{CDCl}_3$ )  $\delta$  8.37 (d,  $J = 8.8$  Hz, 2H), 7.98 (d,  $J = 8.4$  Hz, 2H), 7.65 (t,  $J = 6.4$  Hz, 1H), 7.59 (t,  $J = 7.2$  Hz, 2H), 7.46–7.33 (m, 5H), 6.92 (d,  $J = 8.8$  Hz, 2H), 5.12 (s, 2H), 3.48 (s, 3H);  $^{13}\text{C}\{^1\text{H}\}$  NMR (126 MHz,  $\text{CDCl}_3$ )  $\delta$  209.7, 162.4, 137.9, 136.5, 135.7, 133.6, 130.5, 129.7, 128.6, 128.1, 127.43, 127.40, 113.8, 70.1, 44.7; IR (Neat)  $\nu_{\text{max}}$  3032, 2914, 1598, 1501, 1446, 1322, 1214, 996, 883  $\text{cm}^{-1}$ ; **HRMS (ESI)** for  $\text{C}_{21}\text{H}_{20}\text{NO}_2\text{S}_2$  ( $\text{M}+\text{H}$ ) $^+$ : calcd. 382.0930, found 382.0930.

### ***N*-[4-(trifluoromethoxy)benzothioyl]-*S*-methyl-*S*-phenylsulfoximine (**1f**):**

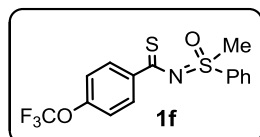

**1f** (388 mg, 74%); yellow crystalline solid;  $R_f = 0.42$  (3:2 hexane/EtOAc);  $^1\text{H}$  NMR (400 MHz,  $\text{CDCl}_3$ )  $\delta$  8.38 (d,  $J = 7.2$  Hz, 2H), 7.95 (d,  $J = 6.0$  Hz, 2H), 7.65 (t,  $J = 6.0$  Hz, 1H), 7.58 (t,  $J = 6.2$  Hz, 2H), 7.16 (d,  $J = 6.4$  Hz, 2H), 3.47 (s, 3H);  $^{13}\text{C}\{^1\text{H}\}$  NMR (101 MHz,  $\text{CDCl}_3$ )  $\delta$  209.0, 151.92, 151.90, 140.4, 136.9, 133.7, 129.9, 129.7, 127.2, 119.4, 44.5;  $^{19}\text{F}$  NMR (470 MHz,  $\text{CDCl}_3$ )  $\delta$  -57.54; IR (Neat)  $\nu_{\text{max}}$  2931, 1592,

1500, 1445, 1412, 1299, 1260, 1206, 1164, 1120, 1101, 1084, 1009, 959  $\text{cm}^{-1}$ ; **HRMS (ESI)** for  $\text{C}_{15}\text{H}_{13}\text{F}_3\text{NO}_2\text{S}_2$  ( $\text{M}+\text{H}$ )<sup>+</sup>: calcd. 360.0334, found 306.0335.

#### ***N*-[Benzothioyl]-*S*-methyl-*S*-phenylsulfoximine (**1g**):**

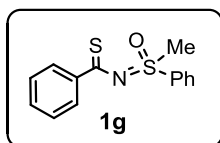

**1g** (378 mg, 71%); yellow crystalline solid;  $R_f = 0.67$  (1:1 hexane/EtOAc);  $^1\text{H}$  NMR (400 MHz,  $\text{CDCl}_3$ )  $\delta$  8.35 (dd,  $J = 7.6$  & 1.2 Hz, 2H), 7.97 (bd,  $J = 7.6$  Hz, 2H), 7.66 (bt,  $J = 6.8$  Hz, 1H), 7.62–7.54 (m, 2H), 7.53–7.46 (m, 1H), 7.36 (t,  $J = 7.8$  Hz, 2H), 3.47 (s, 3H);  $^{13}\text{C}\{^1\text{H}\}$  NMR (101 MHz,  $\text{CDCl}_3$ )  $\delta$  211.2, 142.1, 137.2, 133.6, 131.9, 129.7, 128.1, 127.7, 127.3, 44.6; IR (Neat)  $\nu_{\text{max}}$  2923, 1602, 1576, 1447, 1320, 1269, 1220, 1172, 1089, 965  $\text{cm}^{-1}$ ; **HRMS (ESI)** for  $\text{C}_{14}\text{H}_{14}\text{NOS}_2$  ( $\text{M}+\text{H}$ )<sup>+</sup>: calcd. 276.0511, found 276.0518.

#### ***N*-[4-Fluorobenzothioyl]-*S*-methyl-*S*-phenylsulfoximine (**1h**):**

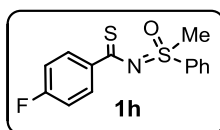

**1h** (320 mg, 61%); yellow crystalline solid;  $R_f = 0.62$  (1:1 hexane/EtOAc);  $^1\text{H}$  NMR (500 MHz,  $\text{CDCl}_3$ )  $\delta$  8.38 (dd,  $J = 8.5$  & 6.0 Hz, 2H), 7.97 (d,  $J = 7.5$  Hz, 2H), 7.67 (bt,  $J = 7.2$  Hz, 1H), 7.60 (t,  $J = 7.2$  Hz, 2H), 7.01 (t,  $J = 8.2$  Hz, 2H), 3.48 (s, 3H);  $^{13}\text{C}\{^1\text{H}\}$  NMR (126 MHz,  $\text{CDCl}_3$ )  $\delta$  209.4, 165.6 (d,  $J = 253$  Hz), 138.5, 137.4, 133.7, 130.6 (d,  $J = 8.8$  Hz), 129.8, 127.3, 114.5 (d,  $J = 21$  Hz), 44.6;  $^{19}\text{F}$  NMR (470 MHz,  $\text{CDCl}_3$ )  $\delta$  -108.22; IR (Neat)  $\nu_{\text{max}}$  3063, 2923, 1672, 1598, 1498, 1446, 1320, 1273, 1222, 1095, 1010, 964, 892  $\text{cm}^{-1}$ ; **HRMS (ESI)** for  $\text{C}_{14}\text{H}_{13}\text{FNOS}_2$  ( $\text{M}+\text{H}$ )<sup>+</sup>: calcd. 294.0417, found 294.0419.

#### ***N*-[4-Chlorobenzothioyl]-*S*-methyl-*S*-phenylsulfoximine (**1i**):**

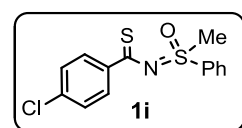

**1i** (398 mg, 88%); yellow crystalline solid;  $R_f = 0.59$  (1:1 hexane/EtOAc);  $^1\text{H}$  NMR (500 MHz,  $\text{CDCl}_3$ )  $\delta$  8.29 (d,  $J = 8.5$  Hz, 2H), 7.96 (d,  $J = 7.5$  Hz, 2H), 7.68 (bt,  $J = 7.5$  Hz, 1H), 7.61 (t,  $J = 7.5$  Hz, 2H), 7.32 (d,  $J = 8.5$  Hz, 2H), 3.48 (s, 3H);  $^{13}\text{C}\{^1\text{H}\}$  NMR (126 MHz,  $\text{CDCl}_3$ )  $\delta$  209.5, 140.5, 138.4, 137.3, 133.8, 129.8, 129.5, 127.8, 127.4, 44.7; IR (Neat)  $\nu_{\text{max}}$  3010, 2923, 1586, 1480, 1446, 1321, 1220, 1167, 1101, 1087, 1007, 965  $\text{cm}^{-1}$ ; **HRMS (ESI)** for  $\text{C}_{14}\text{H}_{13}\text{ClNOS}_2$  ( $\text{M}+\text{H}$ )<sup>+</sup>: calcd. 310.0122, found 310.0127.

#### ***N*-[4-Bromobenzothioyl]-*S*-methyl-*S*-phenylsulfoximine (**1j**):**

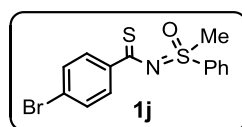

**1j** (360 mg, 69%); yellow crystalline solid;  $R_f = 0.62$  (1:1 hexane/EtOAc);  $^1\text{H}$  NMR (400 MHz,  $\text{CDCl}_3$ )  $\delta$  8.21 (d,  $J = 7.2$  Hz, 2H), 7.99–7.94 (m, 2H), 7.72–7.65 (m, 1H), 7.64–7.58 (m, 2H), 7.48 (d,  $J = 6.8$  Hz, 2H), 3.49 (s, 3H);  $^{13}\text{C}\{^1\text{H}\}$  NMR (126 MHz,  $\text{CDCl}_3$ )  $\delta$  209.6, 140.9, 137.2, 133.8, 130.8, 129.8, 129.7, 127.4, 127.2,

44.7; IR (Neat)  $\nu_{\max}$  3181, 2922, 1579, 1476, 1394, 1319, 1269, 1218, 1168, 1101, 1068, 1004, 834  $\text{cm}^{-1}$ ; **HRMS (ESI)** for  $\text{C}_{14}\text{H}_{12}\text{BrNNaOS}_2$  ( $\text{M}+\text{Na}$ ) $^+$ : calcd. 375.9436, found 375.9435.

#### ***N*-[4-Iodobenzothioyl]-*S*-methyl-*S*-phenylsulfoximine (1k):**

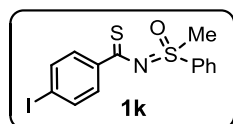

**1k** (342 mg, 65%); yellow crystalline solid;  $R_f = 0.56$  (1:1 hexane/EtOAc);  $^1\text{H}$  NMR (500 MHz,  $\text{CDCl}_3$ )  $\delta$  8.05 (d,  $J = 8.5$  Hz, 2H), 7.94 (d,  $J = 7.5$  Hz, 2H), 7.69 (d,  $J = 9.0$  Hz, 2H), 7.65 (d,  $J = 7.5$  Hz, 1H), 7.58 (t,  $J = 7.75$  Hz, 2H), 3.47 (s, 3H);  $^{13}\text{C}\{^1\text{H}\}$  NMR (126 MHz,  $\text{CDCl}_3$ )  $\delta$  209.7, 141.4, 137.0, 136.8, 133.8, 129.8, 129.6, 127.3, 99.9, 44.6; IR (Neat)  $\nu_{\max}$  3014, 2963, 1599, 1504, 1390, 1306, 1281, 1209, 1056, 1018  $\text{cm}^{-1}$ ; **HRMS (ESI)** for  $\text{C}_{14}\text{H}_{12}\text{INNaOS}_2$  ( $\text{M}+\text{Na}$ ) $^+$ : calcd. 423.9297, found 423.9301.

#### ***N*-[[1,1'-Biphenyl]-4-carbothioyl]-*S*-methyl-*S*-phenylsulfoximine (1l):**

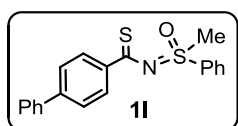

**1l** (392 mg, 64%); yellow crystalline solid;  $R_f = 0.56$  (1:1 hexane/EtOAc);  $^1\text{H}$  NMR (500 MHz,  $\text{CDCl}_3$ )  $\delta$  8.44 (d,  $J = 8.5$  Hz, 2H), 8.00 (d,  $J = 7.5$  Hz, 2H), 7.71–7.57 (m, 7H), 7.46 (bt,  $J = 7.75$  Hz, 2H), 7.38 (bt,  $J = 7.25$  Hz, 1H), 3.51 (s, 3H);  $^{13}\text{C}\{^1\text{H}\}$  NMR (126 MHz,  $\text{CDCl}_3$ )  $\delta$  210.5, 144.6, 141.1, 140.2, 137.4, 133.7, 129.8, 128.8, 128.7, 127.9, 127.4, 127.1, 126.4, 44.7; IR (Neat)  $\nu_{\max}$  3058, 2163, 1736, 1469, 1312, 1279, 1206, 1115, 1003, 856, 731  $\text{cm}^{-1}$ ; **HRMS (ESI)** for  $\text{C}_{20}\text{H}_{18}\text{NOS}_2$  ( $\text{M}+\text{H}$ ) $^+$ : calcd. 352.0824, found 352.0834.

#### ***N*-[4-(Trifluoromethyl)benzothioyl]-*S*-methyl-*S*-phenylsulfoximine (1m):**

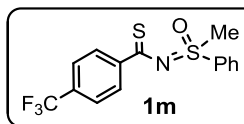

**1m** (381 mg, 72%); yellow crystalline solid;  $R_f = 0.54$  (1:1 hexane/EtOAc);  $^1\text{H}$  NMR (500 MHz,  $\text{CDCl}_3$ )  $\delta$  8.41 (d,  $J = 8.0$  Hz, 2H), 7.97 (d,  $J = 7.5$  Hz, 2H), 7.69 (bt,  $J = 7.5$  Hz, 1H), 7.61 (bt,  $J = 8.5$  Hz, 4H), 3.50 (s, 3H);  $^{13}\text{C}\{^1\text{H}\}$  NMR (126 MHz,  $\text{CDCl}_3$ )  $\delta$  209.5, 144.9, 137.0, 133.9, 132.9 (q,  $J = 32$  Hz), 129.9, 128.3, 127.4, 126.1 (q,  $J = 268$  Hz), 124.7 (q,  $J = 4.0$  Hz), 44.6;  $^{19}\text{F}$  NMR (470 MHz,  $\text{CDCl}_3$ )  $\delta$  -62.76; IR (Neat)  $\nu_{\max}$  3005, 2914, 1609, 1446, 1409, 1324, 1213, 1163, 1060, 981  $\text{cm}^{-1}$ ; **HRMS (ESI)** for  $\text{C}_{15}\text{H}_{13}\text{F}_3\text{NOS}_2$  ( $\text{M}+\text{H}$ ) $^+$ : calcd. 344.0385, found 344.0392.

#### ***N*-[4-Nitrobenzothioyl]-*S*-methyl-*S*-phenylsulfoximine (1n):**

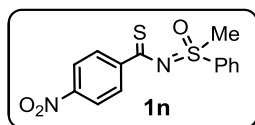

**1n** (341 mg, 66%); red crystalline solid;  $R_f = 0.46$  (1:1 hexane/EtOAc);  $^1\text{H}$  NMR (500 MHz,  $\text{CDCl}_3$ )  $\delta$  8.43 (d,  $J = 9.0$  Hz, 2H), 8.17 (d,  $J = 9.0$  Hz, 2H), 7.97 (d,  $J = 7.5$  Hz, 2H), 7.71 (t,  $J = 7.25$  Hz, 1H), 7.63 (t,  $J = 7.75$  Hz, 2H),

3.52 (s, 3H);  $^{13}\text{C}\{^1\text{H}\}$  NMR (126 MHz,  $\text{CDCl}_3$ )  $\delta$  208.3, 149.4, 146.5, 136.5, 134.1, 129.9, 128.9, 127.4, 122.9, 44.6; IR (Neat)  $\nu_{\text{max}}$  3010, 2917, 1736, 1511, 1476, 1344, 1299, 1162, 106, 758  $\text{cm}^{-1}$ ; **HRMS (ESI)** for  $\text{C}_{14}\text{H}_{12}\text{N}_2\text{NaO}_3\text{S}_2$  ( $\text{M}+\text{Na}$ ) $^+$ : calcd. 343.0182, found 343.0186.

#### ***N*-[4-Methoxycarbonylbenzothioyl]-*S*-methyl-*S*-phenylsulfoximine (1o):**

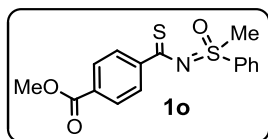

**1o** (425 mg, 80%); yellow crystalline solid;  $R_f = 0.50$  (3:2 hexane/EtOAc);  $^1\text{H}$  NMR (400 MHz,  $\text{CDCl}_3$ )  $\delta$  8.36 (d,  $J = 6.8$  Hz, 2H), 8.03–7.95 (m, 4H), 7.68 (t,  $J = 6.0$  Hz, 1H), 7.61 (t,  $J = 6.0$  Hz, 2H), 3.93 (s, 3H), 3.50 (s, 3H);  $^{13}\text{C}\{^1\text{H}\}$  NMR (101 MHz,  $\text{CDCl}_3$ )  $\delta$  210.1, 166.7, 145.5, 137.2, 133.8, 132.5, 129.8, 129.0, 128.0, 127.4, 52.2, 44.6; IR (Neat)  $\nu_{\text{max}}$  3188, 3054, 2917, 1721, 1656, 1473, 1402, 1324, 1274, 1213, 1105, 894  $\text{cm}^{-1}$ ; **HRMS (ESI)** for  $\text{C}_{16}\text{H}_{16}\text{NO}_3\text{S}_2$  ( $\text{M}+\text{H}$ ) $^+$ : calcd. 334.0566, found 334.0568.

#### ***N*-[4-Cyanobenzothioyl]-*S*-methyl-*S*-phenylsulfoximine (1p):**

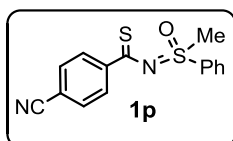

**1p** (380 mg, 72%); red colour solid;  $R_f = 0.50$  (1:1 hexane/EtOAc);  $^1\text{H}$  NMR (500 MHz,  $\text{CDCl}_3$ )  $\delta$  8.40 (d,  $J = 8.5$  Hz, 2H), 7.97 (d,  $J = 7.5$  Hz, 2H), 7.70 (t,  $J = 7.25$  Hz, 1H), 7.67–7.59 (m, 4H), 3.51 (s, 3H);  $^{13}\text{C}\{^1\text{H}\}$  NMR (126 MHz,  $\text{CDCl}_3$ )  $\delta$  208.7, 145.2, 136.8, 134.0, 131.6, 129.9, 128.5, 127.4, 118.6, 114.7, 44.6; IR (Neat)  $\nu_{\text{max}}$  3023, 2217, 1452, 1411, 1308, 1209, 1085, 1010, 965, 891, 844  $\text{cm}^{-1}$ ; **HRMS (ESI)** for  $\text{C}_{15}\text{H}_{13}\text{N}_2\text{OS}_2$  ( $\text{M}+\text{H}$ ) $^+$ : calcd. 301.0464, found 301.0464.

#### ***N*-[4-Acetylbenzothioyl]-*S*-methyl-*S*-phenylsulfoximine (1q):**

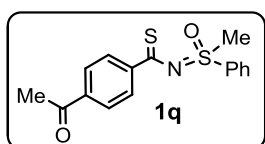

**1q** (400 mg, 77%); orange colour solid;  $R_f = 0.50$  (1:1 hexane/EtOAc);  $^1\text{H}$  NMR (500 MHz,  $\text{CDCl}_3$ )  $\delta$  8.37 (d,  $J = 8.5$  Hz, 2H), 7.97 (d,  $J = 7.5$  Hz, 2H), 7.90 (d,  $J = 8.5$  Hz, 2H), 7.67 (t,  $J = 7.25$  Hz, 1H), 7.60 (t,  $J = 7.75$  Hz, 2H), 3.50 (s, 3H), 2.61 (s, 3H);  $^{13}\text{C}\{^1\text{H}\}$  NMR (126 MHz,  $\text{CDCl}_3$ )  $\delta$  209.9, 197.8, 145.5, 138.9, 137.0, 133.8, 129.8, 128.2, 127.7, 127.4, 44.6, 26.8; IR (Neat)  $\nu_{\text{max}}$  3011, 2913, 1678, 1489, 1265, 1085, 956  $\text{cm}^{-1}$ ; **HRMS (ESI)** for  $\text{C}_{16}\text{H}_{16}\text{NO}_2\text{S}_2$  ( $\text{M}+\text{H}$ ) $^+$ : calcd. 318.0617, found 318.0616.

#### ***N*-[4-(pyridin-2-yloxy)benzothioyl]-*S*-methyl-*S*-phenylsulfoximine (1r):**

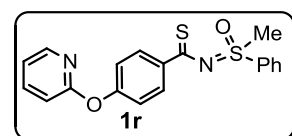

**1r** (350 mg, 67%); yellow colour solid;  $R_f = 0.52$  (2:3 hexane/EtOAc);  $^1\text{H}$  NMR (500 MHz,  $\text{CDCl}_3$ )  $\delta$  8.41 (bd,  $J = 7.0$  Hz, 2H), 8.21 (bs, 1H), 8.00–7.92 (m, 2H), 7.70 (bt,  $J = 7.25$  Hz, 1H), 7.69–7.56 (m, 3H), 7.09 (dd,  $J = 8.75$  & 2.25 Hz, 2H), 7.03 (bt,  $J = 6.0$  Hz, 1H), 6.94 (dd,  $J = 8.0$  & 1.0 Hz, 1H), 3.47 (s, 3H);  $^{13}\text{C}\{^1\text{H}\}$  NMR (126 MHz,  $\text{CDCl}_3$ )  $\delta$  209.7, 163.0, 157.9, 147.7, 139.6, 138.5, 137.4, 133.6, 130.1,

129.7, 127.4, 119.6, 119.1, 112.0, 44.7; IR (Neat)  $\nu_{\max}$  3069, 2910, 1577, 1493, 1464, 1424, 1325, 1236, 1222, 1152, 1084  $\text{cm}^{-1}$ ; **HRMS (ESI)** for  $\text{C}_{19}\text{H}_{17}\text{N}_2\text{O}_2\text{S}_2$  ( $\text{M}+\text{H}$ )<sup>+</sup>: calcd. 369.0726, found 369.0728.

### ***N*-[3-Methoxybenzothioyl]-*S*-methyl-*S*-phenylsulfoximine (1s):**

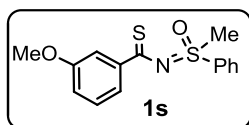

**1s** (427 mg, 81%); yellow crystalline solid;  $R_f$  = 0.41 (3:2 hexane/EtOAc);  $^1\text{H}$  NMR (600 MHz,  $\text{CDCl}_3$ )  $\delta$  7.95 (d,  $J$  = 7.2 Hz, 2H), 7.92 (d,  $J$  = 7.8 Hz, 1H), 7.89 (bs, 1H), 7.66–7.61 (m, 1H), 7.60–7.54 (m, 2H), 7.28–7.23 (m, 1H), 7.04 (d,  $J$  = 9.6 Hz, 1H), 3.83 (s, 3H), 3.46 (s, 3H);  $^{13}\text{C}\{^1\text{H}\}$  NMR (600 MHz,  $\text{CDCl}_3$ )  $\delta$  210.9, 159.0, 143.6, 137.2, 133.7, 129.8, 128.6, 127.3, 120.5, 118.1, 113.3, 55.4, 44.7; IR (Neat)  $\nu_{\max}$  2914, 2835, 1590, 1508, 1412, 1371, 1331, 1259, 1199, 1129, 1087, 1017  $\text{cm}^{-1}$ ; **HRMS (ESI)** for  $\text{C}_{15}\text{H}_{16}\text{NO}_2\text{S}_2$  ( $\text{M}+\text{H}$ )<sup>+</sup>: calcd. 306.0617, found 306.0621.

### ***N*-[3-Phenoxybenzothioyl]-*S*-methyl-*S*-phenylsulfoximine (1t):**

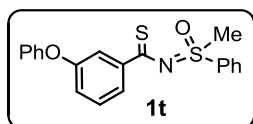

**1t** (421 mg, 80%); yellow crystalline solid;  $R_f$  = 0.59 (1:1 hexane/EtOAc);  $^1\text{H}$  NMR (400 MHz,  $\text{CDCl}_3$ )  $\delta$  8.15–8.08 (m, 1H), 8.02 (bt,  $J$  = 2.0 Hz, 1H), 7.98–7.92 (m, 2H), 7.71–7.63 (m, 1H), 7.59 (bt,  $J$  = 7.6 Hz, 2H), 7.38–7.28 (m, 3H), 7.18–7.07 (m, 2H), 7.06–6.98 (m, 2H), 3.46 (s, 3H);  $^{13}\text{C}\{^1\text{H}\}$  NMR (101 MHz,  $\text{CDCl}_3$ )  $\delta$  210.1, 157.1, 156.5, 144.0, 137.1, 133.7, 129.8, 129.7, 128.9, 127.3, 123.5, 123.2, 122.3, 118.6, 118.4, 44.5; IR (Neat)  $\nu_{\max}$  3017, 1650, 1578, 1486, 1327, 1245, 1213, 1162, 1083, 973, 856  $\text{cm}^{-1}$ ; **HRMS (ESI)** for  $\text{C}_{20}\text{H}_{18}\text{NO}_2\text{S}_2$  ( $\text{M}+\text{H}$ )<sup>+</sup>: calcd. 368.0773, found 368.0770.

### ***N*-[3-Methoxy-4-nitrobenzothioyl]-*S*-methyl-*S*-phenylsulfoximine (1w):**

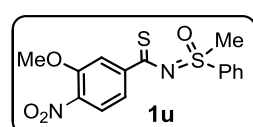

**1w** (410 mg, 79%); red colour crystalline solid;  $R_f$  = 0.44 (1:1 hexane/EtOAc);  $^1\text{H}$  NMR (500 MHz,  $\text{CDCl}_3$ )  $\delta$  8.11–8.05 (m, 1H), 7.99–7.94 (m, 2H), 7.94–7.88 (m, 1H), 7.81–7.73 (m, 1H), 7.73–7.66 (m, 1H), 7.67–7.59 (m, 2H), 3.99 (s, 3H), 3.51 (s, 3H);  $^{13}\text{C}\{^1\text{H}\}$  NMR (500 MHz,  $\text{CDCl}_3$ )  $\delta$  208.2, 152.1, 146.4, 141.1, 136.6, 134.1, 129.9, 127.4, 124.9, 119.14, 119.07, 114.04, 113.97, 56.6, 44.6; IR (Neat)  $\nu_{\max}$  3017, 2931, 1606, 1512, 1398, 1334, 1306, 1251, 1212, 1194, 1172, 1141, 1051, 1082, 964  $\text{cm}^{-1}$ ; **HRMS (ESI)** for  $\text{C}_{15}\text{H}_{15}\text{N}_2\text{O}_4\text{S}_2$  ( $\text{M}+\text{H}$ )<sup>+</sup>: calcd. 351.0468, found 351.0466.

### ***N*-[3-Fluorobenzothioyl]-*S*-methyl-*S*-phenylsulfoximine (1v):**

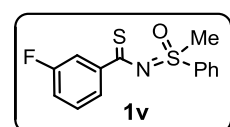

**1v** (410 mg, 79%); yellow crystalline solid;  $R_f$  = 0.52 (3:2 hexane/EtOAc);  $^1\text{H}$  NMR (400 MHz,  $\text{CDCl}_3$ )  $\delta$  8.13 (dt,  $J$  = 7.6 & 1.2 Hz, 1H), 8.06–8.00 (m, 1H),

7.96 (d,  $J = 8.4$  Hz, 2H), 7.68 (t,  $J = 7.0$  Hz, 1H), 7.60 (t,  $J = 7.8$  Hz, 2H), 7.36–7.28 (m, 1H), 7.18 (td,  $J = 8.0$  & 2.5 Hz, 1H), 3.48 (s, 3H);  $^{13}\text{C}\{^1\text{H}\}$  NMR (101 MHz,  $\text{CDCl}_3$ )  $\delta$  209.3, 162.2 (d,  $J = 246$  Hz), 144.2 (d,  $J = 7.0$  Hz), 137.0, 133.8, 129.8, 129.1 (d,  $J = 8.0$  Hz), 127.3, 123.9 (d,  $J = 3.0$  Hz), 118.5 (d,  $J = 22.2$  Hz), 114.7 (d,  $J = 23.2$  Hz), 44.6;  $^{19}\text{F}$  NMR (470 MHz,  $\text{CDCl}_3$ )  $\delta$  -113.69; IR (Neat)  $\nu_{\text{max}}$  3167, 1655, 1624, 1581, 1534, 1446, 1392, 1285, 1266, 1225, 1129, 1020, 913  $\text{cm}^{-1}$ ; **HRMS (ESI)** for  $\text{C}_{14}\text{H}_{13}\text{FNOS}_2$  (M+H) $^+$ : calcd. 294.0417, found 294.0421.

***N*-[3-Chlorobenzothioyl]-*S*-methyl-*S*-phenylsulfoximine (1w):**

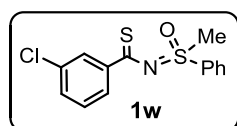

**1w** (412 mg, 79%); yellow crystalline solid;  $R_f = 0.53$  (3:2 hexane/EtOAc);  $^1\text{H}$  NMR (500 MHz,  $\text{CDCl}_3$ )  $\delta$  8.31 (t,  $J = 2.0$  Hz, 1H), 8.25–8.19 (m, 1H), 7.96 (d,  $J = 7.5$  Hz, 2H), 7.68 (t,  $J = 7.25$  Hz, 1H), 7.61 (d,  $J = 7.5$  Hz, 2H), 7.49–7.43 (m, 1H), 7.29 (t,  $J = 7.75$  Hz, 1H), 3.48 (s, 3H);  $^{13}\text{C}\{^1\text{H}\}$  NMR (126 MHz,  $\text{CDCl}_3$ )  $\delta$  209.3, 143.7, 137.1, 133.8, 131.6, 129.8, 128.9, 127.9, 127.4, 126.6, 44.7; IR (Neat)  $\nu_{\text{max}}$  3016, 2922, 1562, 1458, 1321, 1272, 1205, 1081  $\text{cm}^{-1}$ ; **HRMS (ESI)** for  $\text{C}_{14}\text{H}_{13}\text{ClNOS}_2$  (M+H) $^+$ : calcd. 310.0122, found 310.0124.

***N*-[4-Chloro-3-fluorobenzothioyl]-*S*-methyl-*S*-phenylsulfoximine (1x):**

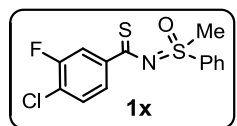

**1x** (400 mg, 77%); yellow crystalline solid;  $R_f = 0.57$  (3:2 hexane/EtOAc);  $^1\text{H}$  NMR (500 MHz,  $\text{CDCl}_3$ )  $\delta$  8.15–8.06 (m, 2H), 7.97–7.93 (m, 2H), 7.69 (t,  $J = 9.25$  Hz, 1H), 7.65–7.57 (m, 2H), 7.40–7.34 (m, 1H), 3.49 (s, 3H);  $^{13}\text{C}\{^1\text{H}\}$  NMR (126 MHz,  $\text{CDCl}_3$ )  $\delta$  207.8 (d,  $J = 3.8$  Hz), 157.3 (d,  $J = 310$  Hz), 142.3 (d,  $J = 7.5$  Hz), 136.8, 133.9, 129.7 (d,  $J = 31.5$  Hz), 127.3, 124.9 (d,  $J = 22.7$  Hz), 124.5 (d,  $J = 3.8$  Hz), 115.9 (d,  $J = 29.0$  Hz), 44.7;  $^{19}\text{F}$  NMR (470 MHz,  $\text{CDCl}_3$ )  $\delta$  -115.74; IR (Neat)  $\nu_{\text{max}}$  3173, 3056, 2913, 1658, 1475, 1323, 1284, 1247, 1216, 1168, 1084, 1062, 1029, 980  $\text{cm}^{-1}$ ; **HRMS (ESI)** for  $\text{C}_{14}\text{H}_{12}\text{ClFNOS}_2$  (M+H) $^+$ : calcd. 328.0027, found 328.0031.

***N*-[4-Bromo-3-fluorobenzothioyl]-*S*-methyl-*S*-phenylsulfoximine (1y):**

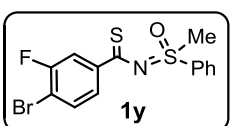

**1y** (380 mg, 73%); yellow crystalline solid;  $R_f = 0.55$  (3:2 hexane/EtOAc);  $^1\text{H}$  NMR (500 MHz,  $\text{CDCl}_3$ )  $\delta$  8.09 (dd,  $J = 10.0$  & 2.0 Hz, 1H), 8.02 (dd,  $J = 8.5$  & 2.0 Hz, 1H), 7.95 (d,  $J = 7.5$  Hz, 2H), 7.69 (t,  $J = 7.25$  Hz, 1H), 7.61 (t,  $J = 7.5$  Hz, 2H), 7.52 (dd,  $J = 8.5$  & 7.0 Hz, 1H), 3.49 (s, 3H);  $^{13}\text{C}\{^1\text{H}\}$  NMR (126 MHz,  $\text{CDCl}_3$ )  $\delta$  207.9 (d,  $J = 2.5$  Hz), 158.3 (d,  $J = 247.0$  Hz), 143.2 (d,  $J = 6.3$  Hz), 136.8, 133.9, 132.6, 129.9, 127.3, 124.9 (d,  $J = 2.5$  Hz), 115.6 (d,  $J = 23.9$  Hz), 113.5 (d,  $J = 21.4$  Hz), 44.7;  $^{19}\text{F}$  NMR (470 MHz,

CDCl<sub>3</sub>)  $\delta$ -107.74; IR (Neat)  $\nu_{\max}$  3012, 2912, 1625, 1472, 1324, 1400, 1246, 1218, 1083 cm<sup>-1</sup>; HRMS (ESI) for C<sub>14</sub>H<sub>12</sub>BrFNOS<sub>2</sub> (M+H)<sup>+</sup>: calcd. 371.9522, found 371.9518.

### *N*-[4-(Anthracen-9-yl)benzothioyl]-*S*-methyl-*S*-phenylsulfoximine (**1z**):

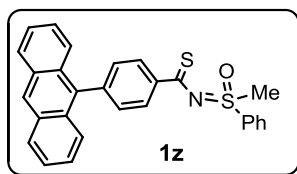

**1z** (356 mg, 67%); yellow solid;  $R_f$  = 0.43 (1:1 hexane/EtOAc); <sup>1</sup>H NMR (400 MHz, CDCl<sub>3</sub>)  $\delta$  8.58 (d,  $J$  = 8.4 Hz, 2H), 8.51 (bs, 1H), 8.06 (t,  $J$  = 8.8 Hz, 4H), 7.73–7.61 (m, 5H), 7.50–7.43 (m, 4H), 7.39–7.31 (m, 2H), 3.56 (s, 3H); <sup>13</sup>C{<sup>1</sup>H} NMR (101 MHz, CDCl<sub>3</sub>)  $\delta$  210.9, 142.9, 141.6, 137.4, 136.2, 133.8, 131.3, 130.9, 129.9, 129.8, 128.3, 128.2, 127.5, 126.8, 126.6, 125.5, 125.1, 44.8; IR (Neat)  $\nu_{\max}$  3014, 2924, 1662, 1601, 1270, 1011 cm<sup>-1</sup>; HRMS (ESI) for C<sub>28</sub>H<sub>22</sub>NOS<sub>2</sub> (M+H)<sup>+</sup>: calcd. 452.1137, found 452.1143.

### *N*-[4-(9H-Carbazol-9-yl)benzothioyl]-*S*-methyl-*S*-phenylsulfoximine (**1z'**):

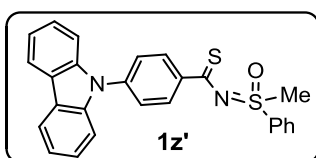

**1z'** (362 mg, 70%); yellow crystalline solid;  $R_f$  = 0.52 (1:1 hexane/EtOAc); <sup>1</sup>H NMR (500 MHz, CDCl<sub>3</sub>)  $\delta$  8.65 (d,  $J$  = 8.5 Hz, 2H), 8.17 (d,  $J$  = 8.0 Hz, 2H), 8.04 (d,  $J$  = 7.5 Hz, 2H), 7.71–7.64 (m, 1H), 7.65–7.59 (m, 4H), 7.53 (d,  $J$  = 8.0 Hz, 2H), 7.48–7.41 (m, 2H), 7.37–7.30 (m, 2H), 3.52 (s, 3H); <sup>13</sup>C{<sup>1</sup>H} NMR (126 MHz, CDCl<sub>3</sub>)  $\delta$  209.4, 140.9, 140.6, 140.1, 137.1, 133.7, 129.8, 129.7, 127.2, 125.9, 125.4, 123.5, 120.2, 109.7, 44.5; IR (Neat)  $\nu_{\max}$  3015, 2913, 1597, 1472, 1390, 1355, 1282, 1169, 996 cm<sup>-1</sup>; HRMS (ESI) for C<sub>26</sub>H<sub>21</sub>N<sub>2</sub>OS<sub>2</sub> (M+Na)<sup>+</sup>: calcd. 441.1090, found 441.1095.

### Preparation of **1aa** and **1bb**: General Procedure (GP-2):<sup>2b,4</sup>

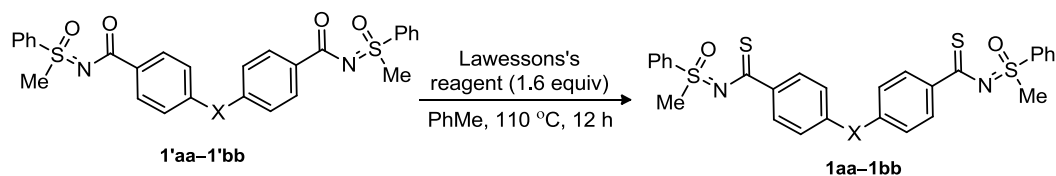

The oven dried reaction tube was charged with *N*-aroylated-MPS (**1'aa** or **1'bb**; 1.0 equiv, 0.5 g) and Lawesson's reagent (1.6 equiv). The reaction tube was evacuated and dry toluene (15 mL) was added and the resulting mixture was stirred at 110 °C for 12 h. Progress of the reaction was monitored by TLC. After complete consumption of **1'aa** or **1'bb**, the reaction mixture was cooled to room temperature. The solvents were evaporated under the reduced pressure and the crude material was extracted with ethylacetate (3 × 10 mL). The organic layer was dried over Na<sub>2</sub>SO<sub>4</sub>. Solvent was filtered and evaporated under reduced pressure. The crude residue was purified over a small pad of silica gel using hexane/ethyl acetate (2:3).



The freshly prepared compounds **1aa** or **1bb** were used for annulations. The compounds **1aa** and **1bb** were stored under inert conditions at  $-20\text{ }^{\circ}\text{C}$ .

### Synthesis of **1aa**:

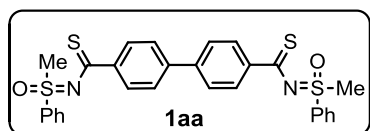

The compound has been isolated by filtration from the reaction mixture followed by washing with MeOH and dichloromethane mixture. **1aa** (356 mg, 67%); yellow colour solid. The compound is insoluble in deuterated  $\text{CHCl}_3$ , THF, DMSO, MeOH, and  $\text{CH}_3\text{CN}$ . Thus, it is impossible to record respective  $^1\text{H}$  NMR and  $^{13}\text{C}$  NMR spectra; IR (Neat)  $\nu_{\text{max}}$  3002, 2911, 1737, 1598, 1444, 1396, 1328, 1311, 1210, 1173, 1083, 999, 978  $\text{cm}^{-1}$ ; **HRMS (ESI)** for  $\text{C}_{28}\text{H}_{25}\text{N}_2\text{O}_2\text{S}_4$  ( $\text{M}+\text{H}$ ) $^+$ : calcd. 549.0793, found 549.0800.

### Synthesis of **1bb**:

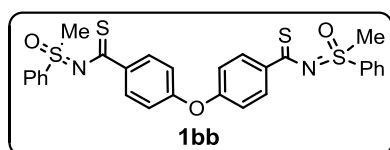

**1bb** (402 mg, 76%); yellow colour solid;  $R_f = 0.42$  (2:3 hexane/EtOAc);  $^1\text{H}$  NMR (400 MHz,  $\text{CDCl}_3$ )  $\delta$  8.38 (bd,  $J = 8.8$  Hz, 4H), 7.98 (bd,  $J = 8.8$  Hz, 4H), 7.67 (bt,  $J = 7.4$  Hz, 2H), 7.60 (bt,  $J = 8.8$  Hz, 4H), 6.98 (bd,  $J = 8.8$  Hz, 4H), 3.49 (s, 6H);  $^{13}\text{C}$  NMR (126 MHz,  $\text{CDCl}_3$ )  $\delta$  209.6, 160.0, 138.0, 137.5, 133.7, 130.4, 129.8, 127.4, 117.8, 44.7; IR (Neat)  $\nu_{\text{max}}$  3005, 2919, 1581, 1451, 1410, 1267, 1209, 1154, 1085, 1004  $\text{cm}^{-1}$ ; **HRMS (ESI)** for  $\text{C}_{28}\text{H}_{25}\text{N}_2\text{O}_3\text{S}_4$  ( $\text{M}+\text{H}$ ) $^+$ : calcd. 565.0743, found 565.0749.

### Preparation of natural products bearing *N*-[arenethioyl]-*S*-methyl-*S*-phenylsulfoximine (**7a-j**): EDC-coupling (General Procedure-3):<sup>2c,4</sup>

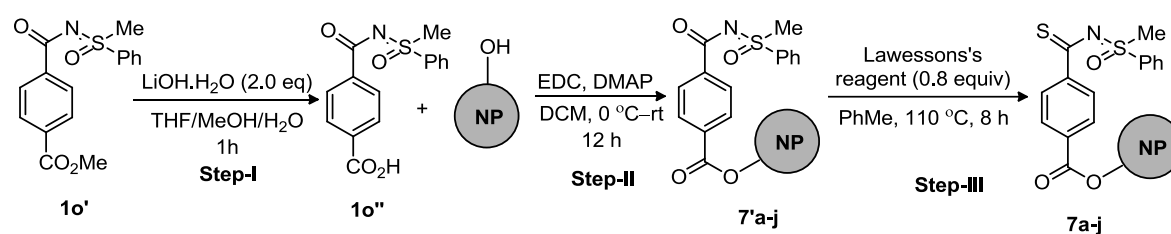

#### Step-I

A mixture of compound **1o'** (4.0 g, 10.8 mmol),  $\text{LiOH}\cdot\text{H}_2\text{O}$  (0.82 g, 19.6 mmol) in THF (80 mL), water (10 mL), and MeOH (5 mL) was stirred at RT. The crude mixture was stirred for 20 h; upon completion of the reaction, THF was removed. The reaction mixture was diluted with water (200 mL) and extracted with EtOAc ( $3 \times 50$  mL). The organic layer was dried over  $\text{Na}_2\text{SO}_4$ , and concentrated under vacuum to give the unreacted starting material **1o'**. The aqueous layer was acidified with 1N HCl and extracted with EtOAc ( $5 \times 50$  mL). The organic

layer was dried over Na<sub>2</sub>SO<sub>4</sub>, and concentrated under vacuum to give the corresponding acid **10''**.

### **Step-II**

A solution of *N*-(3-dimethylaminopropyl)-*N*-ethylcarbodiimide, hydrochloride salt (EDC·HCl) (3.0 equiv), 4-*N,N*-dimethylaminopyridine (DMAP) (2.2 equiv) and sulfoximine-bearing aryl acid (**10''**; 1.1 equiv) in CH<sub>2</sub>Cl<sub>2</sub> (5.0 mL, for 1.0 mmol of sulfoximine) was stirred under an argon atmosphere. The respective natural product (1.0 equiv, 0.50 g) was introduced dropwise at 0 °C. The resulting reaction mixture was stirred for about 30 minutes at 0 °C, and warmed to ambient temperature and continued for 12 h. The reaction mixture was acidified with hydrochloric acid (HCl, 2N). The organic layer was separated; the aqueous layer was extracted with CH<sub>2</sub>Cl<sub>2</sub> (3 times). The combined extracts were washed with 10% aqueous NaHCO<sub>3</sub> and brine. The organic layer was dried over Na<sub>2</sub>SO<sub>4</sub>. Solvent was filtered and evaporated under the reduced pressure. The crude residue was purified by column chromatography on silica gel using hexane/ethyl acetate eluent. The freshly prepared compound **7'a-j** was used for the next step.<sup>2c</sup>

### **Step-III**

The oven dried reaction tube was charged with natural product bearing *N*-aroylated-MPS (**7'a-j**; 1.0 equiv, 0.5 g) and Lawessons's reagent (0.8 equiv). The reaction tube was evacuated and dry toluene (10 mL) was added. The resulting mixture was stirred at 110 °C for 8 h. Progress of the reaction was monitored by TLC. After complete consumption of **7'a-j**, the reaction mixture was cooled to room temperature. The solvents were evaporated under the reduced pressure and the crude material was extracted with ethylacetate (3 × 10 mL). The organic layer was dried over Na<sub>2</sub>SO<sub>4</sub>. Solvent was filtered and evaporated under the reduced pressure. The crude residue was purified over a small pad of silica gel using hexane/ethyl acetate (2:3) eluent. The compounds **7a-j** were stored under inert conditions at -20 °C.<sup>4a</sup>

### **Synthesis of 7a:**

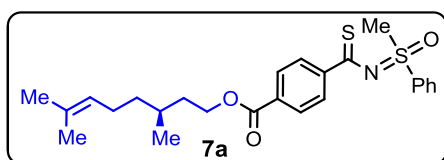

**7a** (374 mg, 72%); orange colour solid; *R<sub>f</sub>* = 0.54 (1:1 hexane/EtOAc); <sup>1</sup>H NMR (400 MHz, CDCl<sub>3</sub>) δ 8.36 (d, *J* = 8.8 Hz, 2H), 8.03–7.97 (m, 4H), 7.68 (t, *J* = 7.4 Hz, 1H), 7.61 (t, *J* = 7.8 Hz, 2H), 5.13–5.07 (m, 1H), 4.41–4.33 (m, 2H), 3.50 (s, 3H), 2.07–1.95 (m, 2H), 1.87–1.77 (m, 1H), 1.67 (bs, 3H), 1.60 (bs, 3H), 1.45–1.34 (m, 1H), 1.30–1.10 (m, 2H), 0.97 (d, *J* = 6.4 Hz, 3H), 0.90–0.81 (m, 1H); <sup>13</sup>C {<sup>1</sup>H} NMR (126 MHz, CDCl<sub>3</sub>) δ 210.1, 166.3, 145.4, 137.1, 133.9, 132.9, 131.4, 129.9, 128.9, 128.0, 127.4, 124.5, 63.7, 44.6, 36.9,

35.4, 29.6, 25.7, 25.4, 19.5, 17.6; IR (Neat)  $\nu_{\max}$  2958, 2920, 2359, 1712, 1598, 446, 1405, 1378, 1321, 1263, 1216, 1097, 1025, 1009, 963, 889  $\text{cm}^{-1}$ ; **HRMS (ESI)** for  $\text{C}_{25}\text{H}_{32}\text{NO}_3\text{S}_2$  ( $\text{M}+\text{H}^+$ ): calcd. 458.1818, found 458.1811.

### **Synthesis of 7b:**

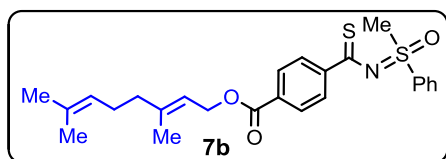

**7b** (370 g, 71%); orange colour solid;  $R_f = 0.54$  (3:2 hexane/EtOAc);  $^1\text{H}$  NMR (500 MHz,  $\text{CDCl}_3$ )  $\delta$  8.35 (d,  $J = 8.5$  Hz, 2H), 8.01 (d,  $J = 7.5$  Hz, 2H), 7.97 (d,  $J = 7.5$  Hz, 2H), 7.68 (t,  $J = 7.25$  Hz, 1H), 7.61 (t,  $J = 8.0$  Hz, 2H), 5.47 (t,  $J = 7.0$  Hz, 1H), 5.09 (t,  $J = 6.75$  Hz, 1H), 4.85 (d,  $J = 7.0$  Hz, 2H), 3.50 (s, 3H), 2.17–2.04 (m, 4H), 1.77 (s, 3H), 1.67 (s, 3H), 1.60 (s, 3H);  $^{13}\text{C}$  NMR (400 MHz,  $\text{CDCl}_3$ )  $\delta$  210.1, 166.2, 145.4, 142.5, 137.2, 133.8, 132.9, 131.8, 129.8, 129.0, 127.9, 127.4, 123.7, 118.3, 62.1, 44.6, 39.5, 26.3, 25.6, 17.6, 16.5; IR (Neat)  $\nu_{\max}$  2928, 2852, 1701, 1448, 1411, 1322, 1266, 1211, 1094, 1004, 965, 922  $\text{cm}^{-1}$ ; **HRMS (ESI)** for  $\text{C}_{25}\text{H}_{30}\text{NO}_3\text{S}_2$  ( $\text{M}+\text{H}^+$ ): calcd. 456.1662, found 456.1667.

### **Synthesis of 7c:**

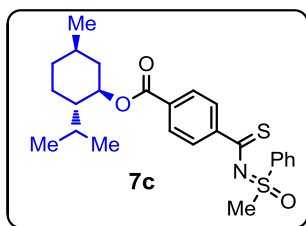

**7c** (372 mg, 72%); yellow crystalline solid;  $R_f = 0.54$  (1:1 hexane/EtOAc);  $^1\text{H}$  NMR (500 MHz,  $\text{CDCl}_3$ )  $\delta$  8.36 (d,  $J = 8.5$  Hz, 2H), 8.04–7.95 (m, 4H), 7.69 (t,  $J = 7.5$  Hz, 1H), 7.61 (t,  $J = 7.25$  Hz, 2H), 4.98–4.90 (m, 1H), 3.51 (s, 3H), 2.13 (bd,  $J = 11.5$  Hz, 1H), 1.98–1.90 (m, 1H), 1.73 (d,  $J = 11.0$  Hz, 2H), 1.60–1.52 (m, 2H), 1.19–1.06 (m, 2H), 0.96–0.89 (m, 7H), 0.79 (d,  $J = 7.0$  Hz, 3H);  $^{13}\text{C}$   $\{^1\text{H}\}$  NMR (126 MHz,  $\text{CDCl}_3$ )  $\delta$  210.2, 165.7, 145.4, 137.2, 133.9, 133.3, 129.9, 129.0, 128.0, 127.4, 75.2, 47.3, 44.6, 40.9, 34.3, 31.4, 26.6, 23.7, 22.0, 20.7, 16.6; IR (Neat)  $\nu_{\max}$  3021, 2924, 2360, 1698, 1568, 1406, 1327, 1264, 1101, 1009, 962  $\text{cm}^{-1}$ ; **HRMS (ESI)** for  $\text{C}_{25}\text{H}_{32}\text{NO}_3\text{S}_2$  ( $\text{M}+\text{H}^+$ ): calcd. 458.1818, found 458.1816.

### **Synthesis of 7d:**

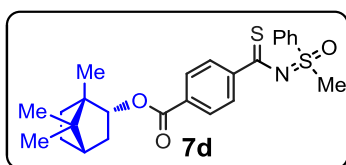

**7d** (451 mg, 87%); colorless gummy liquid.  $R_f = 0.57$  (3:2 hexane/EtOAc);  $^1\text{H}$  NMR (400 MHz,  $\text{CDCl}_3$ )  $\delta$  8.37 (bd,  $J = 8.4$  Hz, 2H), 8.01 (bd,  $J = 8.4$  Hz, 2H), 7.95 (bd,  $J = 7.6$  Hz, 2H), 7.65 (bt,  $J = 7.2$  Hz, 1H), 7.58 (bt,  $J = 7.6$  Hz, 2H), 5.11 (bd,  $J = 8.8$  Hz, 1H), 3.49 (bs, 3H), 2.51–2.39 (m, 1H), 2.18–2.06 (m, 1H), 1.85–1.71 (m, 2H), 1.45–1.21 (m, 2H), 1.12 (dd,  $J = 13.8$  & 3.0 Hz, 1H), 0.95 (s, 3H), 0.90 (s, 6H);  $^{13}\text{C}$  NMR (101 MHz,  $\text{CDCl}_3$ )  $\delta$  209.9, 166.3, 145.3, 136.9, 133.8, 133.1, 129.7, 128.8, 127.9, 127.3, 80.6, 49.0, 47.7, 44.8, 44.5, 36.7, 27.9, 27.2, 19.6, 18.8, 13.5; IR (Neat)  $\nu_{\max}$  2927, 1704, 1595, 1404, 1442, 1323, 1299, 1215, 1115, 1005, 967  $\text{cm}^{-1}$ ; **HRMS (ESI)** for  $\text{C}_{25}\text{H}_{30}\text{NO}_3\text{S}_2$  ( $\text{M}+\text{H}^+$ ): calcd. 456.1662, found 456.1680.

### Synthesis of 7e:

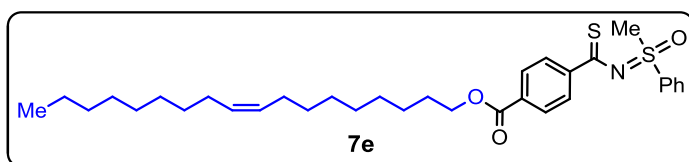

**7e** (324 mg, 63%); yellow crystalline solid;  $R_f = 0.54$  (1:1 hexane/EtOAc);  $^1\text{H}$  NMR (500 MHz,  $\text{CDCl}_3$ )  $\delta$  8.37 (d,  $J = 8.5$  Hz, 2H), 8.01 (d,  $J = 8.5$  Hz, 2H), 7.99

(d,  $J = 7.5$  Hz, 2H), 7.69 (t,  $J = 7.25$  Hz, 1H), 7.62 (t,  $J = 7.75$  Hz, 2H), 5.35 (t,  $J = 5.5$  Hz, 2H), 4.33 (t,  $J = 6.75$  Hz, 2H), 3.51 (s, 3H), 2.09–1.95 (m, 4H), 1.82–1.73 (m, 2H), 1.50–1.38 (m, 3H), 1.38–1.23 (m, 19H), 0.87 (t,  $J = 6.75$  Hz, 3H);  $^{13}\text{C}\{^1\text{H}\}$  NMR (126 MHz,  $\text{CDCl}_3$ )  $\delta$  209.6, 166.0, 145.2, 136.9, 133.6, 132.7, 129.7, 129.6, 129.5, 128.7, 127.8, 127.2, 65.1, 55.3, 44.3, 32.3, 31.6, 29.51, 29.48, 29.3, 29.2, 29.05, 29.01, 28.9, 28.4, 27.0, 26.9, 25.8, 22.4, 13.9; IR (Neat)  $\nu_{\text{max}}$  3006, 2920, 2850, 1715, 1597, 1570, 1502, 1444, 1405, 1329, 1221, 1205, 1117, 1010, 982, 894  $\text{cm}^{-1}$ ; **HRMS (ESI)** for  $\text{C}_{33}\text{H}_{48}\text{NO}_3\text{S}_2$  ( $\text{M}+\text{H}$ ) $^+$ : calcd. 570.3070, found 570.3073.

### Synthesis of 7f:

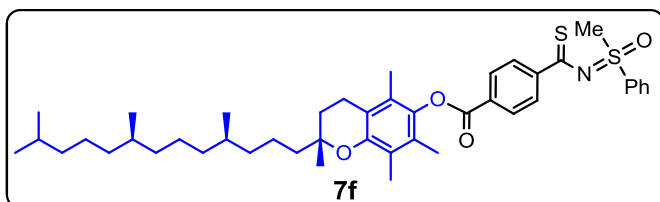

**7f** (360 mg, 72%); orange colour solid;  $R_f = 0.61$  (3:2 hexane/EtOAc);  $^1\text{H}$  NMR (500 MHz,  $\text{CDCl}_3$ )  $\delta$  8.44 (d,  $J = 8.5$  Hz, 2H), 8.23 (d,  $J = 8.5$  Hz, 2H), 8.00 (d,  $J = 7.5$  Hz, 2H), 7.70 (t,  $J = 7.5$  Hz, 1H), 7.63 (t,  $J =$

7.75 Hz, 2H), 3.53 (s, 3H), 2.62 (t,  $J = 6.75$  Hz, 2H), 2.13 (s, 3H), 2.06 (s, 3H), 2.02 (s, 3H), 1.88–1.76 (m, 2H), 1.65–1.50 (m, 3H), 1.42–1.24 (m, 15H), 1.18–1.04 (m, 6H), 0.90–0.83 (m, 12H);  $^{13}\text{C}$  NMR (126 MHz,  $\text{CDCl}_3$ )  $\delta$  210.1, 164.8, 149.5, 146.1, 140.6, 137.2, 133.9, 132.0, 129.9, 129.6, 128.2, 127.5, 126.8, 125.1, 123.2, 117.5, 75.1, 44.7, 39.4, 37.6, 37.55, 37.50, 37.46, 37.42, 37.39, 37.3, 32.8, 32.7, 28.0, 24.80, 24.79, 24.4, 22.7, 22.6, 21.0, 20.6, 19.74, 19.68, 19.65, 19.63, 19.59, 13.0, 12.2; IR (Neat)  $\nu_{\text{max}}$  2954, 2921, 2865, 1736, 1445, 1405, 1378, 1324, 1267, 1237, 1212, 1090, 1009  $\text{cm}^{-1}$ ; **HRMS (ESI)** for  $\text{C}_{44}\text{H}_{62}\text{NO}_4\text{S}_2$  ( $\text{M}+\text{H}$ ) $^+$ : calcd. 732.4115, found 732.4114.

### Synthesis of 7g:

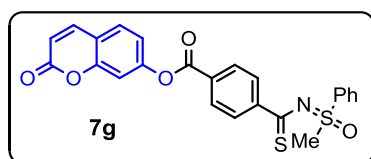

**7g** (403 mg, 76%); yellow crystalline solid; solubility of compound is poor in  $\text{CDCl}_3$ ,  $\text{DMSO}-d_6$  and other solvents.  $R_f = 0.31$  (1:1 hexane/EtOAc);  $^1\text{H}$  NMR (400 MHz,  $\text{DMSO}-d_6$ )  $\delta$  8.37 (d,  $J = 8.4$  Hz, 2H), 8.16 (d,  $J = 8.4$  Hz, 2H), 8.08 (d,  $J =$

9.6 Hz, 1H), 8.02 (d,  $J = 7.2$  Hz, 2H), 7.82 (d,  $J = 8.4$  Hz, 1H), 7.76 (t,  $J = 7.2$  Hz, 1H), 7.69 (t,  $J = 7.4$  Hz, 2H), 7.48 (d,  $J = 9.6$  Hz, 1H), 7.34 (dd,  $J = 8.4$  2.0 Hz, 1H), 6.49 (d,  $J = 4.8$  Hz, 1H), 7.35 (s, 3H);  $^{13}\text{C}\{^1\text{H}\}$  NMR (101 MHz,  $\text{DMSO}-d_6$ )  $\delta$  208.3, 164.1, 160.0, 154.3, 153.1, 146.5, 144.1, 136.3, 134.2, 131.0, 129.93, 129.85, 129.69, 128.3, 127.9, 119.0, 117.1, 115.9,

110.5, 43.9; IR (Neat)  $\nu_{\max}$  2919, 1737, 1708, 1616, 1566, 1505, 1403, 1332, 1305, 1228, 1210, 1124, 1009, 977, 890, 872  $\text{cm}^{-1}$ ; **HRMS (ESI)** for  $\text{C}_{24}\text{H}_{18}\text{NO}_5\text{S}_2$  ( $\text{M}+\text{H}$ )<sup>+</sup>: calcd. 464.0621, found 464.0625.

### Synthesis of 7h:

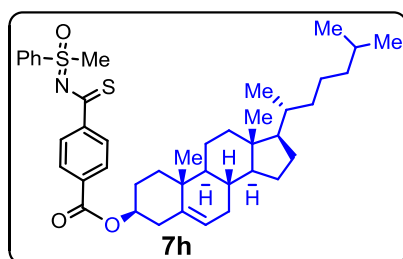

**7h** (348 mg, 68%); yellow crystalline solid;  $R_f$  = 0.54 (1:1 hexane/EtOAc); <sup>1</sup>H NMR (500 MHz, CDCl<sub>3</sub>)  $\delta$  8.36 (d,  $J$  = 9.0 Hz, 2H), 8.04–7.96 (m, 4H), 7.69 (t,  $J$  = 7.5 Hz, 1H), 7.62 (t,  $J$  = 7.75 Hz, 2H), 5.43 (s, 1H), 4.92–4.82 (m, 1H), 3.51 (s, 3H), 2.47 (bd,  $J$  = 7.5 Hz, 2H), 2.06–1.72 (m, 6H), 1.57–1.32 (m, 7H), 1.31–1.07 (m, 13H), 1.05–0.97 (m, 3H), 0.92 (d,  $J$  = 6.5 Hz, 3H), 0.87 (dd,  $J$  = 6.5 & 2.5 Hz, 6H), 0.69 (s, 3H); <sup>13</sup>C {<sup>1</sup>H} NMR (126 MHz, CDCl<sub>3</sub>)  $\delta$  210.2, 165.7, 145.3, 139.6, 137.1, 133.9, 133.3, 129.9, 129.0, 127.9, 127.4, 122.8, 74.9, 56.7, 56.1, 50.0, 44.7, 42.3, 39.7, 39.5, 38.2, 37.0, 36.6, 36.2, 35.8, 31.93, 31.87, 28.2, 28.0, 27.8, 24.3, 23.8, 22.8, 22.5, 21.0, 19.4; IR (Neat)  $\nu_{\max}$  3894, 3762, 3564, 3495, 3433, 2961, 2717, 2442, 1976, 1705, 1406, 1269, 891  $\text{cm}^{-1}$ ; **HRMS (ESI)** for  $\text{C}_{42}\text{H}_{58}\text{NO}_3\text{S}_2$  ( $\text{M}+\text{H}$ )<sup>+</sup>: calcd. 688.3853, found 688.3866.

### Synthesis of 7i:

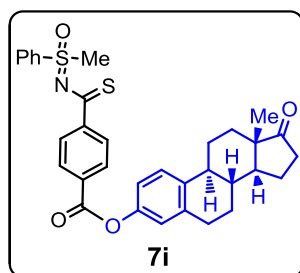

**7i** (309 mg, 61%); light yellow crystalline solid.  $R_f$  = 0.52 (3:7 hexane/EtOAc); <sup>1</sup>H NMR (500 MHz, CDCl<sub>3</sub>)  $\delta$  8.42 (d,  $J$  = 8.5 Hz, 2H), 8.16 (d,  $J$  = 8.5 Hz, 2H), 8.00 (d,  $J$  = 7.5 Hz, 2H), 7.70 (t,  $J$  = 7.25 Hz, 1H), 7.63 (t,  $J$  = 7.5 Hz, 2H), 7.34 (d,  $J$  = 8.5 Hz, 1H), 7.00 (dd,  $J$  = 8.25 & 2.5 Hz, 1H), 6.96 (d,  $J$  = 2.0 Hz, 1H), 3.53 (s, 3H), 2.94 (bt,  $J$  = 4.5 Hz, 2H), 2.51 (dd,  $J$  = 18.75 & 8.75 Hz, 1H), 2.47–2.40 (m, 1H), 2.37–2.29 (m, 1H), 2.22–2.12 (m, 1H), 2.09–2.02 (m, 2H), 2.01–1.96 (m, 1H), 1.67–1.58 (m, 3H), 1.57–1.45 (m, 3H), 0.93 (s, 3H); <sup>13</sup>C {<sup>1</sup>H} NMR (126 MHz, CDCl<sub>3</sub>)  $\delta$  209.7, 165.0, 148.6, 145.8, 138.0, 137.4, 136.9, 133.8, 131.9, 129.8, 129.5, 128.0, 127.3, 126.4, 121.5, 118.7, 50.3, 47.8, 44.5; 44.0, 37.9, 35.7, 31.4, 29.3, 26.2, 25.7, 21.5, 13.7; IR (Neat)  $\nu_{\max}$  2926, 2856, 1729, 1504, 1470, 1260, 1215, 1152, 1071, 1007, 964, 886, 770  $\text{cm}^{-1}$ ; **HRMS (ESI)** for  $\text{C}_{33}\text{H}_{34}\text{NO}_4\text{S}_2$  ( $\text{M}+\text{H}$ )<sup>+</sup>: calcd. 572.1924; found: 572.1929.

## Synthesis of 7j:

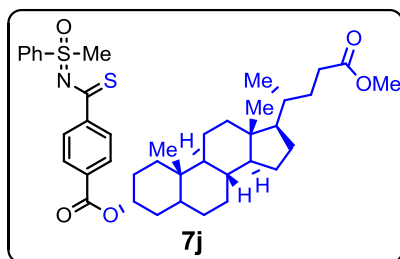

**7j** (380 mg, 74%); orange colour gummy compound;  $R_f = 0.55$  (1:1 hexane/EtOAc);  $^1\text{H NMR}$  (500 MHz,  $\text{CDCl}_3$ )  $\delta$  8.5 (d,  $J = 8.5$  Hz, 2H), 8.04–7.96 (m, 4H), 7.69 (t,  $J = 7.25$  Hz, 1H), 7.62 (t,  $J = 7.75$  Hz, 2H), 5.20–4.93 (m, 1H), 3.66 (s, 3H), 3.51 (s, 3H), 2.39–2.29 (m, 1H), 2.26–2.17 (m, 1H), 2.01–1.95 (m, 2H), 1.92–1.77 (m, 5H), 1.71–1.65 (m, 2H), 1.61–1.40 (m, 7H), 1.32–1.20 (m, 5H), 1.15–1.05 (m, 5H), 0.96 (s, 3H), 0.91 (d,  $J = 6.5$  Hz, 3H), 0.65 (s, 3H);  $^{13}\text{C NMR}$  (126 MHz,  $\text{CDCl}_3$ )  $\delta$  210.2, 174.7, 165.8, 145.3, 137.2, 133.9, 133.4, 129.9, 128.9, 127.9, 127.4, 75.3, 56.4, 56.0, 51.4, 44.6, 42.7, 42.0, 40.5, 40.1, 35.8, 35.3, 35.1, 34.6, 32.3, 31.04, 31.00, 28.2, 27.0, 26.7, 26.3, 24.2, 23.3, 20.9, 18.3, 12.0; IR (Neat)  $\nu_{\text{max}}$  2927, 2863, 1719, 1445, 1405, 1320, 1267, 1220, 1168, 806  $\text{cm}^{-1}$ ; **HRMS (ESI)** for  $\text{C}_{40}\text{H}_{54}\text{NO}_5\text{S}_2$  ( $\text{M}+\text{H}$ ) $^+$ : calcd. 692.3438, found 692.3445.

## Preparation of 7k, 7l, and 7m:<sup>4a</sup>

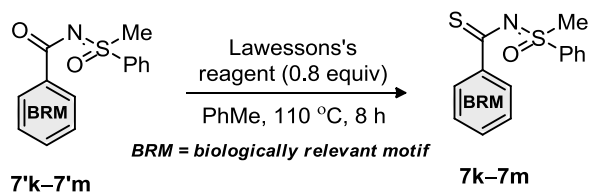

The oven dried reaction tube was charged with *N*-arylated-MPS (**7'k–m**; 1.0 equiv, 0.5 g) and Lawesson's reagent (0.8 equiv). The reaction tube was evacuated and dry toluene (10 mL) was added and the resulting mixture was stirred at 110 °C for 8 h. Progress of the reaction was monitored by TLC. After complete consumption of **7'k–m**, the reaction mixture was cooled to room temperature. The solvents were evaporated under the reduced pressure and the crude material was extracted with ethylacetate ( $3 \times 10$  mL). The organic layer was dried over  $\text{Na}_2\text{SO}_4$ . Solvent was filtered and evaporated under the reduced pressure. The crude residue was purified over a small pad of silica gel using hexane/ethyl acetate (2:3) to provide **7k–m**. The freshly prepared compounds **7k–m** were further used for annulations. The compounds **7k–m** were stored under inert conditions at  $-20$  °C.

### ***N*-[4-(*N,N*-Dipropylsulfamoyl)benzothioyl]-*S*-methyl-*S*-phenylsulfoximine (7k):**

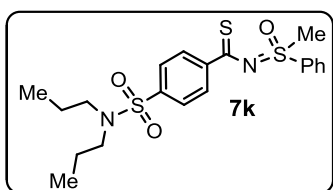

**7k** (380 mg, 74%); yellow crystalline solid;  $R_f = 0.38$  (3:2 hexane/EtOAc);  $^1\text{H}$  NMR (500 MHz,  $\text{CDCl}_3$ )  $\delta$  8.40 (d,  $J = 8.5$  Hz, 2H), 7.95 (d,  $J = 7.5$  Hz, 2H), 7.74 (bd,  $J = 9.0$  Hz, 2H), 7.67 (t,  $J = 7.25$  Hz, 1H), 7.59 (t,  $J = 7.75$  Hz, 2H), 3.49 (s, 3H), 3.05 (t,  $J = 7.75$  Hz, 4H), 1.58–1.47 (m, 4H), 0.84 (t,  $J = 7.25$  Hz, 6H);  $^{13}\text{C}\{^1\text{H}\}$  NMR (126 MHz,  $\text{CDCl}_3$ )  $\delta$  209.0, 144.8, 142.3, 136.8, 133.9, 129.8, 128.5, 127.3, 126.3, 50.0, 44.5, 21.9, 11.0;  $^{13}\text{C}\{^1\text{H}\}$  NMR (126 MHz,  $\text{CDCl}_3$ )  $\delta$  209.0, 144.8, 142.3, 136.8, 133.9, 129.8, 128.5, 127.3, 126.3, 50.0, 44.5, 21.9, 11.0; IR (Neat)  $\nu_{\text{max}}$  2973, 2919, 1683, 1473, 1334, 1267, 1213, 1095, 965  $\text{cm}^{-1}$ ; **HRMS (ESI)** for  $\text{C}_{20}\text{H}_{27}\text{N}_2\text{O}_3\text{S}_3$  ( $\text{M}+\text{H}$ ) $^+$ : calcd. 439.1178, found 439.1179.

### ***N*-[4-((10*H*-phenothiazin-10-yl)methyl)benzothioyl]-*S*-methyl-*S*-phenylsulfoximine (7l):**

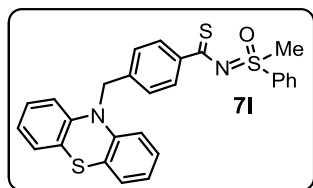

The corresponding acid is synthesized from the literature report.<sup>4b</sup> **7l** (375 mg, 71%); yellow crystalline solid;  $R_f = 0.53$  (3:2 hexane/EtOAc);  $^1\text{H}$  NMR (500 MHz,  $\text{CDCl}_3$ )  $\delta$  8.30 (d,  $J = 8.5$  Hz, 2H), 7.96 (d,  $J = 7.5$  Hz, 2H), 7.65 (t,  $J = 7.5$  Hz, 1H), 7.58 (t,  $J = 7.5$  Hz, 2H), 7.30 (d,  $J = 8.5$  Hz, 2H), 7.09 (dd,  $J = 7.5$  & 1.5 Hz, 2H), 6.99–6.92 (m, 2H), 6.90–6.83 (m, 2H), 6.60 (d,  $J = 8.0$  Hz, 2H), 5.08 (s, 2H), 3.46 (s, 3H);  $^{13}\text{C}\{^1\text{H}\}$  NMR (500 MHz,  $\text{CDCl}_3$ )  $\delta$  210.5, 144.2, 141.2, 141.0, 137.2, 133.7, 129.7, 128.6, 127.3, 127.2, 126.8, 126.0, 123.1, 122.5, 115.3, 52.4, 44.6; IR (Neat)  $\nu_{\text{max}}$  3056, 2919, 1893, 1671, 1592, 1569, 1488, 1460, 1442, 1411, 1317, 1129, 1026, 1008, 961, 889  $\text{cm}^{-1}$ ; **HRMS (ESI)** for  $\text{C}_{27}\text{H}_{23}\text{N}_2\text{O}_3\text{S}_3$  ( $\text{M}+\text{H}$ ) $^+$  calcd. 487.0967, found 487.0978.

### ***N*-[4-(9*H*-Carbazol-9-yl)methyl]benzothioyl]-*S*-methyl-*S*-phenylsulfoximine (7m):**

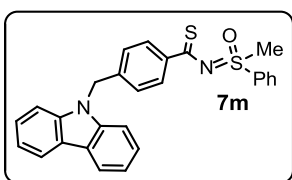

The corresponding acid has been synthesized from the literature report.<sup>4c</sup> **7m** (372 mg, 71%); yellow crystalline solid;  $R_f = 0.53$  (3:12 hexane/EtOAc);  $^1\text{H}$  NMR (500 MHz,  $\text{CDCl}_3$ )  $\delta$  8.24 (d,  $J = 8.0$  Hz, 2H), 8.14 (d,  $J = 8.0$  Hz, 2H), 7.95–7.86 (m, 2H), 7.63 (bt,  $J = 7.5$  Hz, 1H), 7.55 (t,  $J = 7.75$  Hz, 2H), 7.43 (td,  $J = 8.0$  & 1.0 Hz, 2H), 7.34 (d,  $J = 8.0$  Hz, 2H), 7.29–7.24 (m, 2H), 7.11 (d,  $J = 8.5$  Hz, 2H), 5.52 (s, 2H), 3.41 (s, 3H);  $^{13}\text{C}\{^1\text{H}\}$  NMR (500 MHz,  $\text{CDCl}_3$ )  $\delta$  210.4, 141.7, 141.2, 140.5, 137.4, 133.7, 129.7, 128.7, 127.3, 125.9, 125.8, 123.0, 120.4, 119.3, 108.8, 46.4, 44.5; IR (Neat)  $\nu_{\text{max}}$  3044, 3017, 2920, 2361, 1626, 1599, 1483, 1455, 1416, 1324, 1217, 1173, 1008  $\text{cm}^{-1}$ ; **HRMS (ESI)** for  $\text{C}_{27}\text{H}_{23}\text{N}_2\text{O}_3\text{S}_2$  ( $\text{M}+\text{H}$ ) $^+$ : calcd. 455.1246, found 455.1258.

**Table S1: Optimization of Reaction Conditions**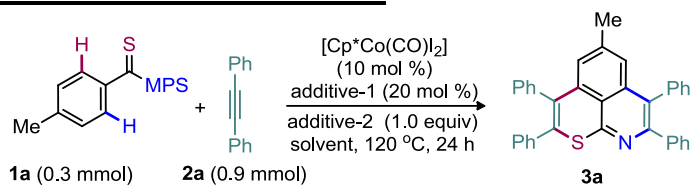

| entry                   | additive 1 (20 mol %)    | additive 2 (1.0 equiv)                  | solvent                                 | yield of <b>3a</b> (%) <sup>b</sup> |
|-------------------------|--------------------------|-----------------------------------------|-----------------------------------------|-------------------------------------|
| 1                       | AgSbF <sub>6</sub>       | Cu(OAc) <sub>2</sub> ·H <sub>2</sub> O  | CICH <sub>2</sub> CH <sub>2</sub> Cl    | 59                                  |
| 2                       | AgSbF <sub>6</sub>       | NaOAc                                   | CICH <sub>2</sub> CH <sub>2</sub> Cl    | 9                                   |
| 3                       | AgSbF <sub>6</sub>       | KOAc                                    | CICH <sub>2</sub> CH <sub>2</sub> Cl    | 5                                   |
| 4                       | AgSbF <sub>6</sub>       | CsOAc                                   | CICH <sub>2</sub> CH <sub>2</sub> Cl    | trace                               |
| 5                       | AgSbF <sub>6</sub>       | Zn(OAc) <sub>2</sub> ·2H <sub>2</sub> O | CICH <sub>2</sub> CH <sub>2</sub> Cl    | 12                                  |
| 6                       | AgSbF <sub>6</sub>       | AgOAc                                   | CICH <sub>2</sub> CH <sub>2</sub> Cl    | 40                                  |
| 7                       | AgSbF <sub>6</sub>       | -                                       | CICH <sub>2</sub> CH <sub>2</sub> Cl    | trace                               |
| 8                       | AgSbF <sub>6</sub>       | Cu(OAc) <sub>2</sub>                    | CICH <sub>2</sub> CH <sub>2</sub> Cl    | 68                                  |
| 9                       | AgBF <sub>4</sub>        | Cu(OAc) <sub>2</sub>                    | CICH <sub>2</sub> CH <sub>2</sub> Cl    | 55                                  |
| 10                      | NaSbF <sub>6</sub>       | Cu(OAc) <sub>2</sub>                    | CICH <sub>2</sub> CH <sub>2</sub> Cl    | trace                               |
| 11                      | KPF <sub>6</sub>         | Cu(OAc) <sub>2</sub>                    | CICH <sub>2</sub> CH <sub>2</sub> Cl    | trace                               |
| 12                      | AgSbF <sub>6</sub>       | Cu(OAc) <sub>2</sub>                    | PhMe                                    | 25                                  |
| 13                      | AgSbF <sub>6</sub>       | Cu(OAc) <sub>2</sub>                    | DME                                     | 39                                  |
| 14                      | AgSbF <sub>6</sub>       | Cu(OAc) <sub>2</sub>                    | HFIP                                    | 30                                  |
| 15                      | AgSbF <sub>6</sub>       | Cu(OAc) <sub>2</sub>                    | CH <sub>3</sub> CN                      | NR                                  |
| 16                      | AgSbF <sub>6</sub>       | Cu(OAc) <sub>2</sub>                    | Dioxane                                 | 60                                  |
| 17                      | AgSbF <sub>6</sub>       | Cu(OAc) <sub>2</sub>                    | TCE                                     | 41                                  |
| 18 <sup>c</sup>         | AgSbF <sub>6</sub>       | Cu(OAc) <sub>2</sub>                    | CICH <sub>2</sub> CH <sub>2</sub> Cl    | 76                                  |
| <b>19<sup>c,d</sup></b> | <b>AgSbF<sub>6</sub></b> | <b>Cu(OAc)<sub>2</sub></b>              | <b>CICH<sub>2</sub>CH<sub>2</sub>Cl</b> | <b>87</b>                           |
| 20 <sup>c,d,e</sup>     | AgSbF <sub>6</sub>       | Cu(OAc) <sub>2</sub>                    | CICH <sub>2</sub> CH <sub>2</sub> Cl    | 76                                  |
| 21 <sup>c,d,f</sup>     | AgSbF <sub>6</sub>       | Cu(OAc) <sub>2</sub>                    | CICH <sub>2</sub> CH <sub>2</sub> Cl    | 55                                  |
| 22 <sup>c,d,g</sup>     | AgSbF <sub>6</sub>       | Cu(OAc) <sub>2</sub>                    | CICH <sub>2</sub> CH <sub>2</sub> Cl    | 49                                  |

<sup>a</sup>Conditions: **1a** (0.3 mmol), **2a** (0.9 mmol), [Cp\*Co(CO)I<sub>2</sub>] (10.0 mol %), additive-1 (20 mol %), additive-2 (0.3 mmol), solvent (2.0 mL) at 120 °C. <sup>b</sup>Isolated yield. <sup>c</sup>[Cp\*Co(CO)I<sub>2</sub>] (15.0 mol %), AgSbF<sub>6</sub> (30 mol %), Cu(OAc)<sub>2</sub> (1.5 equiv) was used. <sup>d</sup>Reaction conducted at 130 °C. <sup>e</sup>**2a** (0.75 mmol) used. <sup>f</sup>[RuCl<sub>2</sub>(*p*-cymene)]<sub>2</sub> (10 mol%), <sup>g</sup>[Cp\*RhCl<sub>2</sub>]<sub>2</sub> (5.0 mol%).

The annulation reactions were carried out in a 15 mL screw capped tube. The tube was charged with *N*-[4-methylbenzothioyl]-*S*-methyl-*S*-phenylsulfoximine (**1a**, 0.3 mmol), diphenyl acetylene (**2a**, 0.9 mmol), [Cp\*Co(CO)I<sub>2</sub>] (10.0 mol %), and additive-2 (0.3 mmol). Subsequently, additive-1 (20 mol %) was introduced in to the tube in a glove box. Solvent (2.0 mL) was added to the mixture and the resulting mixture was stirred at 120 °C in a heating block for 24 h. The reaction mixture was cooled to ambient temperature, filtered through a small plug of Celite and then washed with dichloromethane (3 × 10 mL). The solvents were evaporated under reduced pressure and the crude material was purified using column chromatography on neutral alumina (5-10% *n*-hexane/EtOAc eluent) to give the desired product.



**Effect of directing groups in the double-annulation of 4-methylbenzothioamide derivatives (I–IV) with diphenyl acetylene (2a) (GP-4):**

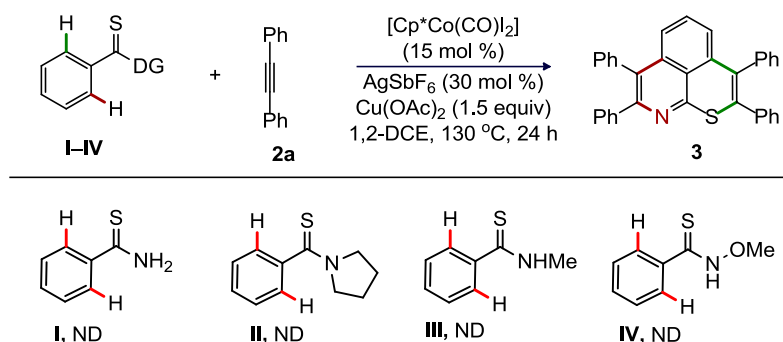

The annulation reactions were carried out in a 15 mL screw capped tube. The tube was charged with various directing group protected 4-methylbenzothioamide (I–IV, 0.3 mmol), diphenyl acetylene (2a, 0.9 mmol), [Cp\*Co(CO)I<sub>2</sub>] (21.5 mg, 15.0 mol %), and Cu(OAc)<sub>2</sub> (81 mg, 0.45 mmol). Subsequently, AgSbF<sub>6</sub> (31 mg, 30 mol %) was introduced in to the tube in a glove box. Freshly dried 1,2-DCE (2.0 mL) was added to the mixture and the resulting mixture was stirred at 130 °C in a heating block for 24 h. The reaction mixture was cooled to ambient temperature, filtered through a small plug of Celite and then washed with dichloromethane (3 × 10 mL). The solvents were evaporated under reduced pressure and the crude material was purified using column chromatography on neutral alumina (5–10% *n*-hexane/EtOAc eluent) to give the desired product.

**Synthesis of 6,6-fused thiopyrano-isoquinoline via direct double-annulation of *N*-[arenethioyl]-*S*-methyl-*S*-phenylsulfoximine (1) with diphenyl acetylene (2a) (GP-4A):**

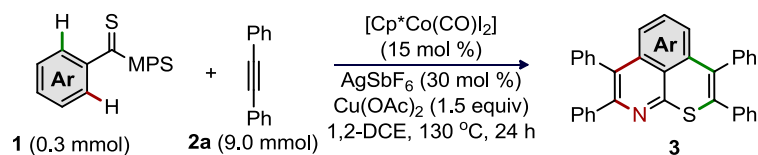

The annulation reactions were carried out in a 15 mL screw capped tube. The tube was charged with freshly prepared 1 (0.3 mmol), diphenyl acetylene (2a, 0.9 mmol), [Cp\*Co(CO)I<sub>2</sub>] (21.5 mg, 15 mol %), and Cu(OAc)<sub>2</sub> (81 mg, 0.45 mmol). Subsequently, AgSbF<sub>6</sub> (31 mg, 30 mol %) was introduced in to the tube in a glove box. Freshly dried 1,2-DCE (2.0 mL) was added to the mixture and the resulting mixture was stirred at 130 °C in a heating block for 24 h. The reaction mixture was cooled to ambient temperature, filtered through a small plug of Celite and then washed with dichloromethane (3 × 10 mL). The solvents were evaporated under reduced pressure and the crude material was purified using

column chromatography on neutral alumina (5–10% *n*-hexane/EtOAc eluent) to give the desired products **3**.

### 5-Methyl-2,3,7,8-tetraphenylthiopyrano[4,3,2-ij]isoquinoline (**3a**):

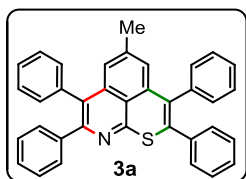

**3a** (131 mg, 87%); yellow crystalline solid; mp = 255–256 °C; <sup>1</sup>H NMR (500 MHz, CDCl<sub>3</sub>) δ 7.41–7.31 (m, 5H), 7.29 (t, *J* = 7.25 Hz, 2H), 7.25–7.20 (m, 5H), 7.19–7.16 (m, 6H), 7.14 (d, *J* = 7.0 Hz, 2H), 7.04 (s, 1H), 6.65 (s, 1H), 2.17 (s, 3H); <sup>13</sup>C{<sup>1</sup>H} NMR (126 MHz, CDCl<sub>3</sub>) δ 158.1, 150.7, 141.3, 140.2, 138.0, 137.8, 137.6, 137.4, 136.4, 136.1, 131.9, 131.1, 130.9, 130.0, 129.5, 128.6, 128.0, 127.9, 127.5, 127.15, 127.13, 127.10, 126.6, 125.0, 122.7, 122.6, 22.3; IR (Neat)  $\nu_{\max}$  3053, 2921, 2851, 2359, 1736, 1441, 1313, 1276, 1196, 911 cm<sup>-1</sup>; **HRMS (ESI)** for C<sub>36</sub>H<sub>26</sub>NS (M+H)<sup>+</sup>: calcd.: 504.1780; found: 504.1780.

### 5-(*tert*-Butyl)-2,3,7,8-tetraphenylthiopyrano[4,3,2-ij]isoquinoline (**3b**):

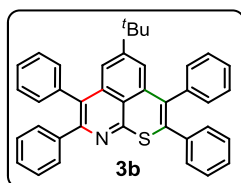

**3b** (127 mg, 78%); yellow colour solid; mp = 298–302 °C; <sup>1</sup>H NMR (500 MHz, CDCl<sub>3</sub>) δ 7.40–7.27 (m, 8H), 7.25–7.21 (m, 6H), 7.20–7.16 (m, 5H), 7.15 (bs, 1H), 7.14 (s, 1H), 6.90 (bd, *J* = 1.5 Hz, 1H), 1.04 (s, 9H); <sup>13</sup>C{<sup>1</sup>H} NMR (125 MHz, CDCl<sub>3</sub>) δ 158.0, 153.9, 150.6, 140.3, 137.9, 137.7, 137.6, 137.5, 136.2, 135.5, 132.3, 131.1, 130.8, 130.0, 129.5, 128.53, 128.50, 128.0, 127.9, 127.5, 127.24, 127.17, 127.14, 127.08, 122.5, 122.2, 118.9, 35.1, 30.6; IR (Neat)  $\nu_{\max}$  3020, 2958, 1746, 1599, 1482, 1381, 1259, 1197, 1127, 1025, 991, 896 cm<sup>-1</sup>; **HRMS (ESI)** for C<sub>39</sub>H<sub>32</sub>NS (M+H)<sup>+</sup>: calcd. 546.2250; found: 546.2257.

### 5-Methoxy-2,3,7,8-tetraphenylthiopyrano[4,3,2-ij]isoquinoline (**3c**):

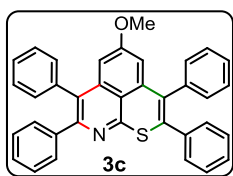

**3c** (143 mg, 92%); pale yellow crystalline solid. mp = 178–179 °C; <sup>1</sup>H NMR (500 MHz, CDCl<sub>3</sub>) δ 7.40–7.28 (m, 6H), 7.27 (d, *J* = 7.5 Hz, 2H), 7.25–7.20 (m, 5H), 7.19–7.15 (m, 5H), 7.14–7.11 (m, 2H), 6.60 (d, *J* = 2.5 Hz, 1H), 6.45 (d, *J* = 3.0 Hz, 1H), 3.55 (s, 3H); <sup>13</sup>C{<sup>1</sup>H} NMR (126MHz, CDCl<sub>3</sub>) δ 161.3, 157.6, 151.1, 140.2, 140.1, 138.7, 137.8, 137.6, 137.3, 137.0, 131.7, 131.0, 130.8, 130.0, 129.4, 128.7, 128.6, 128.0, 127.5, 127.24, 127.20, 127.1, 126.6, 120.2, 114.4, 102.7, 54.9; IR (Neat)  $\nu_{\max}$  3056, 2927, 1598, 1535, 1486, 1312, 1233, 1166, 1052, 991, 899 cm<sup>-1</sup>; **HRMS (ESI)** for C<sub>36</sub>H<sub>26</sub>NOS (M+H)<sup>+</sup>: calcd. 520.1730; found: 520.1730.

### 5-Phenoxy-2,3,7,8-tetraphenylthiopyrano[4,3,2-ij]isoquinoline (3d):

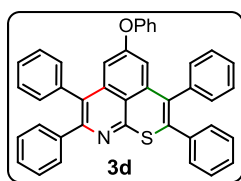

**3d** (157 mg, 90%); yellow crystalline solid. mp = 309–310 °C; <sup>1</sup>H NMR (500 MHz, CDCl<sub>3</sub>) δ 7.31 (dd, *J* = 6.5 & 3.0 Hz, 2H), 7.25–7.13 (m, 16H), 7.10 (d, *J* = 7.0 Hz, 2H), 7.07 (d, *J* = 7.0 Hz, 2H), 7.03 (t, *J* = 7.25 Hz, 1H), 6.86 (d, *J* = 7.5 Hz, 2H), 6.67 (bd, *J* = 7.0 Hz, 1H), 6.50 (d, *J* = 2.0 Hz, 1H); <sup>13</sup>C {<sup>1</sup>H} NMR (126MHz, CDCl<sub>3</sub>) δ 159.6, 157.9, 155.4, 151.1, 140.1, 140.0, 139.3, 137.43, 137.39, 137.3, 137.2, 131.8, 130.9, 130.7, 130.0, 129.6, 129.4, 128.6, 128.5, 128.1, 128.0, 127.5, 127.3, 127.2, 126.7, 123.9, 121.0, 119.4, 115.4, 109.3; IR (Neat)  $\nu_{\max}$  2359, 1605, 1568, 1486, 1312, 1209, 1167, 1154, 1028, 940 cm<sup>-1</sup>; **HRMS (ESI)** for C<sub>41</sub>H<sub>28</sub>NOS (M+H)<sup>+</sup>: calcd.: 582.1886; found: 582.1885.

### 5-(Benzyloxy)-2,3,7,8-tetraphenylthiopyrano[4,3,2-ij]isoquinoline (3e):

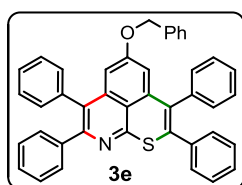

**3e** (148 mg, 83%); red crystalline solid; mp = 257–258 °C; <sup>1</sup>H NMR (500 MHz, CDCl<sub>3</sub>) δ 7.36–7.30 (m, 5H), 7.29–7.24 (m, 5H), 7.23–7.13 (m, 12H), 7.13–7.12 (m, 1H), 7.11–7.08 (m, 2H), 6.63 (d, *J* = 2.5 Hz, 1H), 6.45 (d, *J* = 2.5 Hz, 1H), 4.81 (s, 2H); <sup>13</sup>C {<sup>1</sup>H} NMR (126 MHz, CDCl<sub>3</sub>) δ 160.2, 157.6, 151.0, 140.2, 139.9, 138.7, 137.7, 137.6, 137.3, 137.0, 135.9, 131.7, 131.0, 130.8, 130.0, 129.4, 128.7, 128.69, 128.5, 128.03, 127.98, 127.7, 127.5, 127.2, 127.15, 127.13, 126.5, 120.1, 114.7, 104.3, 69.7; IR (Neat)  $\nu_{\max}$  3026, 2360, 1595, 1536, 1441, 1320, 1216, 1167, 1022, 993, 723 cm<sup>-1</sup>; **HRMS (ESI)** for C<sub>42</sub>H<sub>30</sub>ONS (M+H)<sup>+</sup>: calcd. 596.2043; found: 596.2047.

### 2,3,7,8-Tetraphenyl-5-(trifluoromethoxy)thiopyrano[4,3,2-ij]isoquinoline (3f):

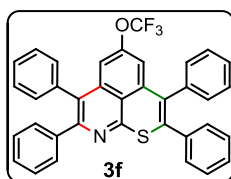

**3f** (151 mg, 89%); pale yellow crystalline solid. mp = 230–231 °C; <sup>1</sup>H NMR (500 MHz, CDCl<sub>3</sub>) δ 7.45–7.36 (m, 5H), 7.33 (d, *J* = 7.5 Hz, 2H), 7.30–7.27 (m, 1H), 7.26–7.20 (m, 10H), 7.16 (d, *J* = 6.5 Hz, 2H), 7.08 (bs, 1H), 6.67 (s, 1H); <sup>13</sup>C {<sup>1</sup>H} NMR (126MHz, CDCl<sub>3</sub>) δ 158.3, 151.6, 151.1, 139.8, 139.63, 139.56, 138.5, 136.93, 136.87, 136.7, 131.5, 130.8, 130.6, 130.0, 129.3, 128.9, 128.8, 128.3, 128.1, 127.63, 127.60, 127.5, 127.1, 122.5, 120.1 (q, *J* = 256.6 Hz), 115.8, 112.8; <sup>19</sup>F NMR (376 MHz, CDCl<sub>3</sub>) δ -57.50; IR (Neat)  $\nu_{\max}$  3395, 2921, 2851, 1735, 1607, 1561, 1535, 1442, 1376, 1308, 1255, 1167, 1026 cm<sup>-1</sup>; **HRMS (ESI)** for C<sub>36</sub>H<sub>23</sub>F<sub>3</sub>NOS (M+H)<sup>+</sup>: calcd. 574.1447; found: 574.1450.

### 2,3,7,8-Tetraphenylthiopyrano[4,3,2-ij]isoquinoline (3g):

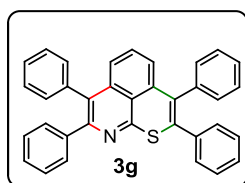

**3g** (121 mg, 82%); yellow crystalline solid. mp = 321–322 °C; <sup>1</sup>H NMR (500 MHz, CDCl<sub>3</sub>) δ 7.42–7.33 (m, 6H), 7.32–7.28 (m, 4H), 7.27–7.19 (m, 10H), 7.18–7.14 (m, 2H), 6.83 (dd, *J* = 6.25 & 2.25 Hz, 1H); <sup>13</sup>C {<sup>1</sup>H} NMR (126 MHz, CDCl<sub>3</sub>) δ 158.5, 150.5, 140.1, 137.84, 137.76, 137.51, 137.3, 136.6, 136.0, 132.1, 131.1, 131.0, 130.9, 130.1, 129.5, 128.6, 128.02, 127.98, 127.5, 127.24, 127.20, 127.1,

124.2, 123.28, 123.26; IR (Neat)  $\nu_{\max}$  3009, 1649, 1587, 1478, 1427, 1303, 1071, 987, 890  $\text{cm}^{-1}$ ;  
**HRMS (ESI)** for  $\text{C}_{35}\text{H}_{24}\text{NS}$  ( $\text{M}+\text{H}$ )<sup>+</sup>: calcd. 490.1624, found 490.1628.

#### 5-Fluoro-2,3,7,8-tetraphenylthiopyrano[4,3,2-ij]isoquinoline (3h):

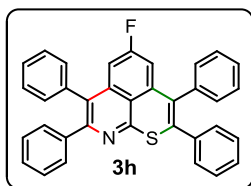

**3h** (120 mg, 79%); light yellow crystalline solid. mp = 264–265 °C; <sup>1</sup>H NMR (500 MHz,  $\text{CDCl}_3$ )  $\delta$  7.40–7.35 (m, 2H), 7.35–7.32 (m, 3H), 7.30 (bt,  $J$  = 7.5 Hz, 2H), 7.25–7.23 (m, 1H), 7.22–7.17 (m, 10H), 7.12 (dd,  $J$  = 8.25 & 1.25 Hz, 2H), 6.84 (dd,  $J$  = 10.5 & 2.0 Hz, 1H), 6.53 (dd,  $J$  = 10.75 & 2.25 Hz, 1H); <sup>13</sup>C{<sup>1</sup>H} NMR (101MHz,  $\text{CDCl}_3$ )  $\delta$  164.1 (d,  $J$  = 200.0 Hz), 158.2, 151.4, 140.4, 140.3, 140.2, 139.8, 138.4, 137.2, 137.1, 137.0, 131.6 (d,  $J$  = 2.0 Hz), 130.9, 130.7, 130.0, 129.4, 128.8 (d,  $J$  = 4.0 Hz), 128.3, 128.1, 127.6, 127.5, 127.4, 126.9 (d,  $J$  = 4.0 Hz), 121.7, 112.4, 112.2, 107.4, 107.2; <sup>19</sup>F NMR (376 MHz,  $\text{CDCl}_3$ )  $\delta$  -105.21; IR (Neat)  $\nu_{\max}$  3050, 2359, 1530, 1439, 1416, 1378, 1306, 1210, 1156, 857  $\text{cm}^{-1}$ ; **HRMS (ESI)** for  $\text{C}_{35}\text{H}_{23}\text{FNS}$  ( $\text{M}+\text{H}$ )<sup>+</sup>: calcd. 508.1530; found: 508.1528.

#### 5-Chloro-2,3,7,8-tetraphenylthiopyrano[4,3,2-ij]isoquinoline (3i):

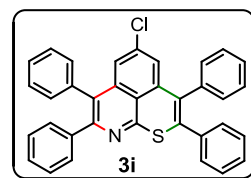

**3i** (134 mg, 85%); pale-yellow crystalline solid. mp = 282–283 °C; <sup>1</sup>H NMR (500 MHz,  $\text{CDCl}_3$ )  $\delta$  7.41–7.28 (m, 8H), 7.27–7.23 (m, 1H), 7.22–7.16 (m, 10H), 7.12 (d,  $J$  = 7.0 Hz, 2H), 6.74 (bd,  $J$  = 2.0 Hz, 1H); <sup>13</sup>C{<sup>1</sup>H} NMR (126 MHz,  $\text{CDCl}_3$ )  $\delta$  158.3, 151.6, 139.7, 139.1, 138.7, 138.3, 137.9, 137.05, 137.00, 136.9, 131.4, 131.0, 130.7, 130.0, 129.4, 128.9, 128.8, 128.2, 128.1, 127.6, 127.4, 126.4, 123.3, 122.6, 122.0; IR (Neat)  $\nu_{\max}$  3053, 2921, 2850, 1725, 1672, 1591, 1524, 1440, 1328, 1206, 1072, 990  $\text{cm}^{-1}$ ; **HRMS (ESI)** for  $\text{C}_{35}\text{H}_{23}\text{ClNS}$  ( $\text{M}+\text{H}$ )<sup>+</sup>: calcd. 524.1234; found: 524.1232.

#### 5-Bromo-2,3,7,8-tetraphenylthiopyrano[4,3,2-ij]isoquinoline (3j):

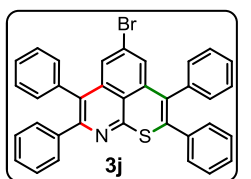

**3j** (147 mg, 86%); yellow crystalline solid; mp = 298–299 °C; <sup>1</sup>H NMR (500 MHz,  $\text{CDCl}_3$ )  $\delta$  7.34 (bd,  $J$  = 2.0 Hz, 1H), 7.31 (bt,  $J$  = 6.75 Hz, 2H), 7.29–7.25 (m, 2H), 7.24 (d,  $J$  = 7.5 Hz, 2H), 7.19 (d,  $J$  = 7.5 Hz, 1H), 7.17–7.10 (m, 11H), 7.06 (d,  $J$  = 7.0 Hz, 2H), 6.84 (bd,  $J$  = 1.5 Hz, 1H); <sup>13</sup>C{<sup>1</sup>H} NMR (101 MHz,  $\text{CDCl}_3$ )  $\delta$  158.4, 151.5, 139.6, 139.1, 138.5, 138.2, 136.9, 136.7, 131.2, 130.9, 130.7, 130.0, 129.3, 128.84, 128.81, 128.2, 128.0, 127.5, 127.4, 126.8, 126.1, 125.9, 125.2, 122.7; IR (Neat)  $\nu_{\max}$  3051, 2360, 1738, 1588, 1527, 1485, 1356, 1327, 1206, 1072, 989  $\text{cm}^{-1}$ ; **HRMS (ESI)** for  $\text{C}_{35}\text{H}_{23}\text{BrNS}$  ( $\text{M}+\text{H}$ )<sup>+</sup>: calcd. 568.0729; found: 568.0725.

### 5-Iodo-2,3,7,8-tetraphenylthiopyrano[4,3,2-ij]isoquinoline (3k):

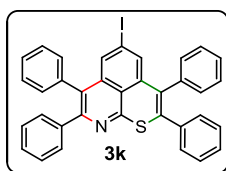

**3k** (167 mg, 91%); yellow crystalline solid. mp = 345–347 °C;  $^1\text{H}$  NMR (500 MHz,  $\text{CDCl}_3$ )  $\delta$  7.61 (bd,  $J = 1.5$  Hz, 1H), 7.41–7.28 (m, 7H), 7.27–7.22 (m, 1H), 7.21–7.16 (m, 10H), 7.10 (d,  $J = 6.5$  Hz, 2H), 7.06 (bd,  $J = 1.5$  Hz, 1H);  $^{13}\text{C}\{^1\text{H}\}$  NMR (126 MHz,  $\text{CDCl}_3$ )  $\delta$  158.6, 151.5, 139.8, 139.1, 138.1, 138.0, 137.03, 136.98, 136.7, 131.9, 131.6, 131.0, 130.7, 130.0, 129.3, 128.83, 128.82, 128.2, 128.1, 127.6, 127.4, 125.7, 123.0, 99.8; IR (Neat)  $\nu_{\text{max}}$  3050, 1584, 1523, 1486, 1439, 1354, 1304, 1205, 1071, 987, 896  $\text{cm}^{-1}$ ; **HRMS (ESI)** for  $\text{C}_{35}\text{H}_{23}\text{INS}$  ( $\text{M}+\text{H}$ ) $^+$ : calcd. 616.0590, found 616.0594.

### 2,3,5,7,8-Pentaphenylthiopyrano[4,3,2-ij]isoquinoline (3l):

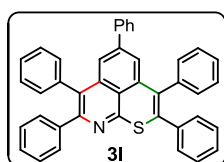

**3l** (141 mg, 83%); light yellow crystalline solid. mp = 305–306 °C;  $^1\text{H}$  NMR (500 MHz,  $\text{CDCl}_3$ )  $\delta$  7.44 (bd,  $J = 1.5$  Hz, 2H), 7.36–7.32 (m, 4H), 7.29 (d,  $J = 7.0$  Hz, 1H), 7.25–7.23 (m, 3H), 7.23–7.19 (m, 4H), 7.17–7.13 (m, 11H), 7.06 (bd,  $J = 2.0$  Hz, 2H);  $^{13}\text{C}\{^1\text{H}\}$  NMR (126 MHz,  $\text{CDCl}_3$ )  $\delta$  158.3, 151.0, 143.4, 140.4, 140.1, 138.2, 137.6, 137.4, 137.3, 137.2, 136.5, 132.2, 131.1, 130.8, 130.0, 129.4, 128.73, 128.69, 128.67, 128.0, 127.9, 127.5, 127.31, 127.26, 127.21, 123.2, 122.7, 121.2; IR (Neat)  $\nu_{\text{max}}$  3023, 2918, 2849, 1600, 1571, 1534, 1485, 1310, 1202, 1088, 1051  $\text{cm}^{-1}$ ; **HRMS (ESI)** for  $\text{C}_{41}\text{H}_{28}\text{NS}$  ( $\text{M}+\text{H}$ ) $^+$ : calcd. 566.1937; found: 566.1930.

### 2,3,7,8-Tetraphenyl-5-(trifluoromethyl)thiopyrano[4,3,2-ij]isoquinoline (3m):

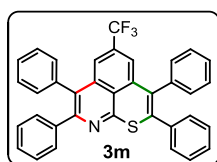

**3m** (140 mg, 84%); yellow crystalline solid; mp = 269–270 °C;  $^1\text{H}$  NMR (500 MHz,  $\text{CDCl}_3$ )  $\delta$  7.58 (s, 2H), 7.48–7.42 (m, 5H), 7.42–7.38 (m, 4H), 7.36 (d,  $J = 9.5$  Hz, 3H), 7.34–7.30 (m, 2H), 7.21–7.16 (m, 4H), 7.02 (bs, 2H);  $^{13}\text{C}\{^1\text{H}\}$  NMR (126 MHz,  $\text{CDCl}_3$ )  $\delta$  158.5, 151.8, 139.5, 138.2, 137.7, 136.9, 136.8, 136.5, 132.8, 132.5, 131.7, 130.9, 130.7, 130.0, 129.4, 128.9, 128.3, 128.1, 127.67 (q,  $J = 7.5$  Hz), 124.9, 124.5, 122.4, 120.2, 118.4;  $^{19}\text{F}$  NMR (376 MHz,  $\text{CDCl}_3$ )  $\delta$  -63.62; IR (Neat)  $\nu_{\text{max}}$  3052, 2921, 2359, 2339, 1560, 1486, 1390, 1303, 1269, 1161, 1123, 1106, 894, 693  $\text{cm}^{-1}$ ; **HRMS (ESI)** for  $\text{C}_{36}\text{H}_{23}\text{F}_3\text{NS}$  ( $\text{M}+\text{H}$ ) $^+$ : calcd. 558.1498; found: 558.1499.

### 5-Nitro-2,3,7,8-tetraphenylthiopyrano[4,3,2-ij]isoquinoline (3n):

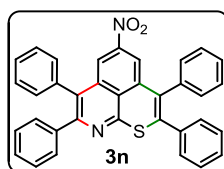

**3n** (127 mg, 79%); reddish crystalline solid. mp = 299–300 °C;  $^1\text{H}$  NMR (400 MHz,  $\text{CDCl}_3$ )  $\delta$  8.13 (bd,  $J = 2.0$  Hz, 2H), 7.55 (d,  $J = 2.0$  Hz, 2H), 7.48–7.45 (m, 4H), 7.41–7.36 (m, 4H), 7.32 (s, 1H), 7.28–7.26 (m, 5H), 7.19 (bd,  $J = 1.6$  Hz, 2H), 7.17 (bt,  $J = 0.8$  Hz, 2H);  $^{13}\text{C}\{^1\text{H}\}$  NMR (101 MHz,  $\text{CDCl}_3$ )  $\delta$  158.8, 152.5, 149.4, 139.4, 139.3, 139.1, 138.3, 136.6, 136.4, 136.0, 131.7, 130.8, 130.6, 130.0, 129.3, 129.14, 129.11, 128.5, 128.4, 128.2, 128.1, 128.0, 127.8, 127.7, 125.5, 118.4, 115.7; IR (Neat)  $\nu_{\text{max}}$

3051, 2921, 1737, 1521, 1484, 1330, 1204, 1101, 1024  $\text{cm}^{-1}$ ; **HRMS (ESI)** for  $\text{C}_{35}\text{H}_{23}\text{N}_2\text{O}_2\text{S}$  ( $\text{M}+\text{H}$ )<sup>+</sup>: calcd. 535.1475; found: 535.1473.

### Methyl 2,3,7,8-tetraphenylthiopyrano[4,3,2-ij]isoquinoline-5-carboxylate (**3o**):

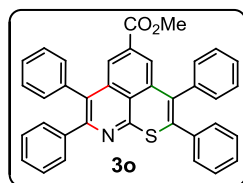

**3o** (113 mg, 69%); pale yellow solid. mp = 318–320 °C;  $^1\text{H}$  NMR (500 MHz,  $\text{CDCl}_3$ )  $\delta$  7.95 (s, 1H), 7.41–7.27 (m, 8H), 7.25–7.16 (m, 11H), 7.13 (bd,  $J$  = 7.5 Hz, 2H), 3.73 (s, 3H);  $^{13}\text{C}\{^1\text{H}\}$  NMR (126 MHz,  $\text{CDCl}_3$ )  $\delta$  166.4, 158.6, 151.4, 139.7, 137.6, 137.22, 137.17, 137.1, 137.0, 136.7, 132.13, 132.07, 131.0, 130.7, 130.0, 129.4, 128.8, 128.2, 127.9, 127.5, 127.4, 125.5, 125.2, 52.3; IR (Neat)  $\nu_{\text{max}}$  2954, 1722, 1535, 1432, 1383, 1257, 1217, 1115, 1001  $\text{cm}^{-1}$ ; **HRMS (ESI)** for  $\text{C}_{37}\text{H}_{26}\text{NO}_2\text{S}$  ( $\text{M}+\text{H}$ )<sup>+</sup>: calcd. 548.1679, found 548.1687.

### 2,3,7,8-Tetraphenylthiopyrano[4,3,2-ij]isoquinoline-5-carbonitrile (**3p**):

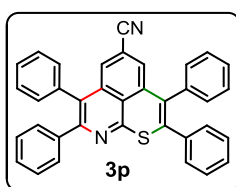

**3p** (105 mg, 68%); yellow crystalline solid. mp = >350 °C;  $^1\text{H}$  NMR (500 MHz,  $\text{CDCl}_3$ )  $\delta$  7.54 (bs, 1H), 7.44–7.36 (m, 3H), 7.35–7.30 (m, 4H), 7.29–7.25 (m, 1H), 7.22–7.15 (m, 10H), 7.09 (d,  $J$  = 7.0 Hz, 2H), 6.89 (bd,  $J$  = 1.5 Hz, 1H);  $^{13}\text{C}\{^1\text{H}\}$  NMR (126 MHz,  $\text{CDCl}_3$ )  $\delta$  158.7, 152.1, 139.2, 139.0, 138.3, 137.7, 136.6, 136.5, 136.1, 131.2, 130.8, 130.6, 130.0, 129.3, 129.12, 129.08, 128.5, 128.2, 128.04, 127.98, 127.89, 127.78, 127.70, 126.96, 124.7, 123.4, 118.4, 114.9; IR (Neat)  $\nu_{\text{max}}$  3019, 2921, 2851, 2227, 1734, 1598, 1574, 1532, 1485, 1456, 1439, 1333, 1308, 1203, 1154, 1063, 1026, 991  $\text{cm}^{-1}$ ; **HRMS (ESI)** for  $\text{C}_{36}\text{H}_{23}\text{N}_2\text{S}$  ( $\text{M}+\text{H}$ )<sup>+</sup>: calcd. 515.1578, found 515.1581.

### 1-(2,3,7,8-Tetraphenylthiopyrano[4,3,2-ij]isoquinolin-5-yl)ethanone (**3q**):

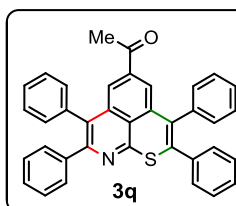

**3q** (115 mg, 72%); yellow crystalline solid. mp = 286–287 °C;  $^1\text{H}$  NMR (500 MHz,  $\text{CDCl}_3$ )  $\delta$  7.83 (bs, 1H), 7.42–7.32 (m, 7H), 7.30 (d,  $J$  = 7.5 Hz, 2H), 7.25–7.17 (m, 10H), 7.14 (d,  $J$  = 7.5 Hz, 2H), 2.30 (s, 3H);  $^{13}\text{C}\{^1\text{H}\}$  NMR (126 MHz,  $\text{CDCl}_3$ )  $\delta$  197.8, 158.5, 151.3, 139.5, 138.5, 137.7, 137.3, 137.1, 137.0, 136.7, 132.1, 130.9, 130.7, 130.0, 129.3, 128.8, 128.2, 128.1, 128.0, 127.65, 127.58, 127.53, 127.46, 125.3, 124.0, 121.2, 26.5; IR (Neat)  $\nu_{\text{max}}$  2954, 1686, 1537, 1486, 1385, 1247, 1316, 1177  $\text{cm}^{-1}$ ; **HRMS (ESI)** for  $\text{C}_{37}\text{H}_{26}\text{NOS}$  ( $\text{M}+\text{H}$ )<sup>+</sup>: calcd. 532.1730, found 532.1738.

### 2,3,7,8-Tetraphenyl-5-(pyridin-2-yloxy)thiopyrano[4,3,2-ij]isoquinoline (**3r**):

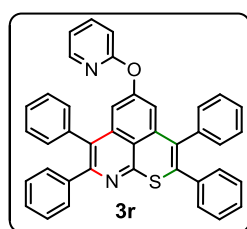

**3r** (107 mg, 61%); yellow crystalline solid. mp = 335–336 °C;  $^1\text{H}$  NMR (500 MHz,  $\text{CDCl}_3$ )  $\delta$  8.10 (bd,  $J$  = 3.5 Hz, 1H), 7.58 (bt,  $J$  = 7.0 Hz, 1H), 7.39–7.07 (m, 20H), 7.10–6.88 (m, 2H), 6.77 (d,  $J$  = 8.0 Hz, 1H), 6.61 (bs, 1H);  $^{13}\text{C}\{^1\text{H}\}$  NMR (126 MHz,  $\text{CDCl}_3$ )  $\delta$  162.6, 158.1, 156.2, 151.1, 147.5,

140.0, 139.8, 139.3, 139.0, 137.4, 137.3, 137.2, 131.8, 131.0, 130.8, 130.0, 129.4, 128.6, 128.1, 128.0, 127.5, 127.24, 127.21, 126.9, 121.8, 118.9, 117.6, 113.1, 111.8; IR (Neat)  $\nu_{\max}$  1604, 1559, 1435, 1315, 1168, 987, 946  $\text{cm}^{-1}$ ; **HRMS (ESI)** for  $\text{C}_{40}\text{H}_{27}\text{N}_2\text{OS}$  ( $\text{M}+\text{H}$ )<sup>+</sup>: calcd. 583.1839, found 583.1840.

**6-Methoxy-2,3,7,8-tetraphenylthiopyrano[4,3,2-ij]isoquinoline (3s)/ 4-Methoxy-2,3,7,8-tetraphenylthiopyrano[4,3,2-ij]isoquinoline (3s')**:

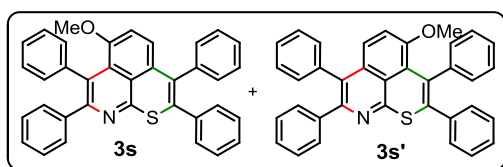

Inseparable mixture of **3s** and **3s'** (10 : 1, 90 mg, 57%) was obtained; yellow crystalline solid; mp = >350 °C; **major isomer 3s (structure is elucidated by x-ray analysis)**:  $^1\text{H}$  NMR (500 MHz,  $\text{CDCl}_3$ )  $\delta$  7.46–7.35 (m, 3H), 7.35–7.18 (m, 18H), 6.94–6.88 (m, 1H), 6.84 (d,  $J$  = 8.5 Hz, 1H), 3.42 (s, 3H);  $^{13}\text{C}\{^1\text{H}\}$  NMR (126 MHz,  $\text{CDCl}_3$ )  $\delta$  158.6, 154.1, 152.6, 141.0, 140.60, 140.59, 138.1, 137.3, 132.1, 132.0, 130.9, 130.3, 130.0, 129.7, 129.5, 129.3, 128.6, 128.1, 128.0, 127.8, 127.5, 127.2, 126.8, 126.4, 125.7, 124.5, 111.7, 55.6; **Representative peaks for minor isomer 3s'**:  $^1\text{H}$  NMR (500 MHz,  $\text{CDCl}_3$ )  $\delta$  7.35–7.23 (m, 1.46 H), 7.17–7.10 (m, 0.41 H), 3.27 (s, 0.34 H);  $^{13}\text{C}\{^1\text{H}\}$  NMR (126 MHz,  $\text{CDCl}_3$ )  $\delta$  157.7, 153.3, 148.8, 141.4, 139.9, 137.6, 137.4, 135.5, 132.6, 131.1, 128.2, 127.9, 127.4, 127.0, 125.9, 125.6, 123.4, 121.2, 56.9; IR (Neat)  $\nu_{\max}$  3052, 2925, 1527, 1456, 1349, 1327, 1302, 1257, 1201, 1158, 1070  $\text{cm}^{-1}$ ; **HRMS (ESI)** for  $\text{C}_{36}\text{H}_{26}\text{NOS}$  ( $\text{M}+\text{H}$ )<sup>+</sup>: calcd. 520.1730, found 520.1735.

*As 3s and 3s' are inseparable, thus, independent proton counts for major isomer 3s and minor isomer 3s' does not properly match. Ratio of the both regioisomers 3s:3s' was determined based on the characteristic Me- $H^1$  proton integration.  $H^1$  NMR (500 MHz,  $\text{CDCl}_3$ )  $H^1$  for 3s/3s':  $\delta$  = 3.42 (s, 3H, major)/ 3.27 (s, 3H, minor).*

**6-Phenoxy-2,3,7,8-tetraphenylthiopyrano[4,3,2-ij]isoquinoline (3t):**

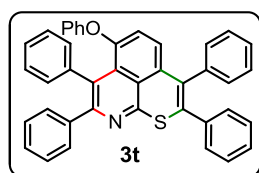

**3t** (99 mg, 66%); yellow crystalline solid. mp = 329–330 °C;  $^1\text{H}$  NMR (400 MHz,  $\text{CDCl}_3$ )  $\delta$  7.29 (t,  $J$  = 7.6 Hz, 2H), 7.24–7.09 (m, 13H), 7.03 (t,  $J$  = 8.0 Hz, 2H), 7.00–6.93 (m, 6H), 6.89–6.80 (m, 2H), 6.30 (bd,  $J$  = 8.0 Hz, 2H);  $^{13}\text{C}\{^1\text{H}\}$  NMR (126 MHz,  $\text{CDCl}_3$ )  $\delta$  158.9, 157.5, 152.9, 149.1, 140.3, 139.2, 137.7, 137.1, 134.8, 133.6, 132.0, 130.8, 130.6, 130.4, 129.9, 129.4, 128.9, 128.7, 128.05, 128.01, 127.3, 127.2, 126.9, 126.6, 126.0, 124.8, 124.3, 123.4, 121.8, 116.1; IR (Neat)  $\nu_{\max}$  1586, 1525, 1485, 1459, 1349, 1317, 1244, 1202, 1071, 1049, 879  $\text{cm}^{-1}$ ; **HRMS (ESI)** for  $\text{C}_{41}\text{H}_{28}\text{NOS}$  ( $\text{M}+\text{H}$ )<sup>+</sup>: calcd. 582.1886, found 582.1890.



**6-Methoxy-5-nitro-2,3,7,8-tetraphenylthiopyrano[4,3,2-ij]isoquinoline (3u):**

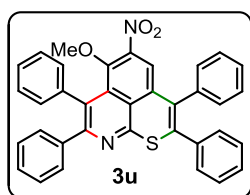

**3u** (54 mg, 32%); red crystalline solid. mp = >350 °C; <sup>1</sup>H NMR (500 MHz, CDCl<sub>3</sub>) δ 7.30 (t, *J* = 7.25 Hz, 2H), 7.26–7.14 (m, 16H), 7.11 (bd, *J* = 7.0 Hz, 2H), 6.98 (s, 1H), 3.03 (s, 3H); <sup>13</sup>C{<sup>1</sup>H} NMR (101 MHz, CDCl<sub>3</sub>) δ 159.0, 154.8, 146.7, 145.8, 139.8, 138.2, 137.4, 136.4, 134.5, 132.9, 131.2, 130.9, 130.6, 129.9, 129.2, 129.1, 128.4, 128.2, 127.9, 127.5, 127.3, 127.0, 126.8, 126.6, 126.0, 117.5, 63.0; IR (Neat) ν<sub>max</sub> 3053, 2919, 1710, 1610, 1527, 1491, 1442, 1350, 1306, 1264, 1088, 1046 cm<sup>-1</sup>; **HRMS (ESI)** for C<sub>36</sub>H<sub>25</sub>N<sub>2</sub>O<sub>3</sub>S (M+H)<sup>+</sup>: calcd. 565.1580, found 565.1584.

**6-Fluoro-2,3,7,8-tetraphenylthiopyrano[4,3,2-ij]isoquinoline (3v)/ 4-Fluoro-2,3,7,8-tetraphenylthiopyrano[4,3,2-ij]isoquinoline (3v')**

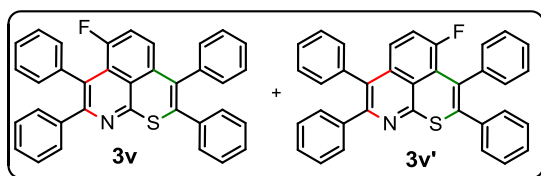

Inseparable mixture of **3v** and **3v'** (5 : 1, 90 mg, 57%) was obtained; yellow crystalline solid; mp = 323–324 °C; **major isomer 3v**: <sup>1</sup>H NMR (400 MHz, CDCl<sub>3</sub>) δ 7.45–7.26 (m, 7.24H), 7.25–7.12 (m, 16.29H), 7.09 (dd, *J* = 15.5 & 6.5 Hz, 1H); <sup>13</sup>C{<sup>1</sup>H} NMR (101 MHz, CDCl<sub>3</sub>) δ 157.7 (d, *J* = 5.0 Hz), 155.6 (d, *J* = 255.5 Hz), 152.6, 149.9 (d, *J* = 2.0 Hz), 139.6, 139.3 (d, *J* = 5.0 Hz), 137.6, 137.0, 136.8, 134.7 (d, *J* = 7.0 Hz), 131.0, 130.8, 130.0, 129.3, 129.8 (d, *J* = 4.0 Hz), 129.4, 128.7, 128.05, 128.0, 127.9, 127.7, 127.6, 127.5, 127.3, 126.5, 125.7 (d, *J* = 9.0 Hz), 122.4, 122.1; <sup>19</sup>F NMR (376 MHz, CDCl<sub>3</sub>) δ -105.56; **Representative peaks for minor isomer 3v'**: <sup>1</sup>H NMR (400 MHz, CDCl<sub>3</sub>) δ 6.99 (dd, *J* = 15.5 & 10.5 Hz, 0.30H), 7.00 (dd, *J* = 10.75 & 5.75 Hz, 0.23H); <sup>13</sup>C{<sup>1</sup>H} NMR (101 MHz, CDCl<sub>3</sub>) δ 158.9 (d, *J* = 3.0 Hz), 156.1 (d, *J* = 255.5 Hz), 139.8, 138.9 (d, *J* = 4.0 Hz), 137.5, 133.3 (d, *J* = 5.0 Hz), 131.8, 130.4 (d, *J* = 4.0 Hz), 129.9, 129.4, 127.6 (d, *J* = 2.0 Hz), 127.5, 127.4, 127.3, 127.2, 127.1 (d, *J* = 1.0 Hz), 126.8, 125.4 (d, *J* = 3.0 Hz), 124.0 (d, *J* = 7.0 Hz), 123.1, 121.3 (d, *J* = 7.0 Hz), 117.0 (d, *J* = 2.0 Hz); <sup>19</sup>F NMR (376 MHz, CDCl<sub>3</sub>) δ -107.35; IR (Neat) ν<sub>max</sub> 2921, 2851, 1598, 1560, 1527, 1494, 1440, 1371, 1318, 1298, 1154, 1088, 1027 cm<sup>-1</sup>; **HRMS (ESI)** for C<sub>35</sub>H<sub>23</sub>FN<sub>2</sub>S (M+H)<sup>+</sup>: calcd. 508.1530, found 508.1534.

*As 3v and 3v' are inseparable, thus, independent proton counts for major isomer 3v and minor isomer 3v' does not properly match. Ratio of the both regioisomers 3v:3v' was determined based on the characteristic F<sup>19</sup> integration. F<sup>19</sup> NMR (376 MHz, CDCl<sub>3</sub>) F<sup>19</sup> for 3v/3v': δ = -105.56 (1.00; major)/ -107.35 (0.19; minor).*



**5-Chloro-6-fluoro-2,3,7,8-tetraphenylthiopyrano[4,3,2-ij]isoquinoline (3w)/ 5-Chloro-4-fluoro-2,3,7,8-tetraphenylthiopyrano[4,3,2-ij]isoquinoline (3w')**:

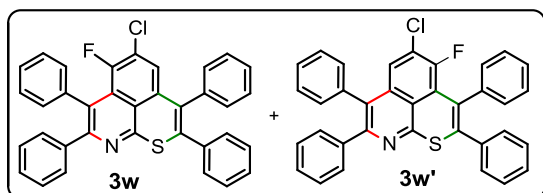

Inseparable mixture of **3w/3w'** (5:1, 110 mg, 69%) was obtained; yellow crystalline solid; mp = 343–345 °C; **major isomer 3w**:  $^1\text{H}$  NMR (500 MHz,  $\text{CDCl}_3$ )  $\delta$  7.42–7.33 (m, 4H), 7.32–7.28 (m, 2.50H), 7.32–7.28 (m, 2.50H), 7.27–7.25 (m, 1.61H), 7.24–7.08 (m, 18H);  $^{13}\text{C}\{^1\text{H}\}$  NMR (126 MHz,  $\text{CDCl}_3$ )  $\delta$  158.86, 150.87 (d,  $J = 257.0$  Hz), 139.5, 139.3, 138.7 (d,  $J = 5.0$  Hz), 136.5 (d,  $J = 19.0$  Hz), 134.7, 130.9, 130.7, 129.9, 129.9, 129.7 (d,  $J = 3.8$  Hz), 129.3, 128.9, 128.1 (d,  $J = 5.0$  Hz), 128.0, 127.8, 127.6 (d,  $J = 2.0$  Hz), 127.53, 127.47, 127.0, 124.9, 123.9;  $^{19}\text{F}$  NMR (376 MHz,  $\text{CDCl}_3$ )  $\delta$  –108.63; **Representative peaks for minor isomer 3w'**:  $^1\text{H}$  NMR (500 MHz,  $\text{CDCl}_3$ ) 6.80 (d,  $J = 6.0$  Hz, 0.22H);  $^{13}\text{C}\{^1\text{H}\}$  NMR (126 MHz,  $\text{CDCl}_3$ )  $\delta$  158.8, 157.6 (d,  $J = 5.0$  Hz), 158.6, 152.5, 138.4, 136.7 (d,  $J = 16.4$  Hz), 134.0, 130.3 (d,  $J = 3.8$  Hz), 128.5, 128.4, 128.3, 127.7, 127.4, 127.0, 126.1, 124.4, 123.1 (d,  $J = 5.0$  Hz);  $^{19}\text{F}$  NMR (376 MHz,  $\text{CDCl}_3$ )  $\delta$  –109.87; IR (Neat)  $\nu_{\text{max}}$  3055, 3021, 1592, 1554, 1522, 1488, 1440, 1377, 1319, 1232, 1201, 1106, 1027, 895  $\text{cm}^{-1}$ ; **HRMS (ESI)** for  $\text{C}_{35}\text{H}_{22}\text{ClFNS}$  ( $\text{M}+\text{H}$ ) $^+$ : calcd. 542.1140, found 542.1144.

As **3w** and **3w'** are inseparable, thus, independent proton counts for major isomer **3w** and minor isomer **3w'** does not properly match. Ratio of the both regioisomers **3w:3w'** was determined based on the characteristic  $\text{F}^{19}$  integration.  $\text{F}^{19}$  NMR (376 MHz,  $\text{CDCl}_3$ )  $\text{F}^{19}$  for **3w/3w'**:  $\delta$  = –108.63 (1.00; major)/ –109.87 (0.23; minor).

**5-Bromo-6-fluoro-2,3,7,8-tetraphenylthiopyrano[4,3,2-ij]isoquinoline (3x)/ 5-Bromo-4-fluoro-2,3,7,8-tetraphenylthiopyrano[4,3,2-ij]isoquinoline (3x')**:

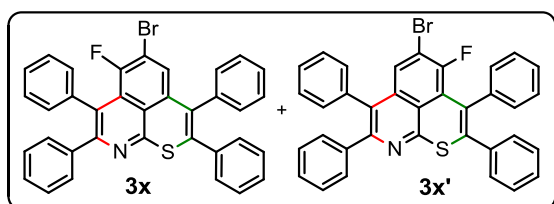

Inseparable mixture of **3x/3x'** (13:1, 92 mg, 52%); yellow crystalline solid. mp = 348–349 °C; The compounds solubility in chloroform/DMSO is poor. **Major isomer 3x**:  $^1\text{H}$  NMR (500 MHz,  $\text{CDCl}_3$ )  $\delta$  7.54 (d,  $J = 7.5$  Hz, 1H), 7.43–7.34 (m, 3H), 7.33–7.25 (m, 3H), 7.22–7.10 (m, 18H);  $^{13}\text{C}\{^1\text{H}\}$  NMR (126 MHz,  $\text{CDCl}_3$ )  $\delta$  157.7 (d,  $J = 6.3$  Hz), 153.6, 151.8 (d,  $J = 239.4$  Hz), 139.5, 139.3, 138.8 (d,  $J = 5.0$  Hz), 136.6, 136.4, 135.1, 131.0, 130.9, 130.6, 129.7 (d,  $J = 5.0$  Hz), 129.3, 128.9, 128.3, 128.1 (d,  $J = 5.0$  Hz), 128.0, 127.7, 126.5, 124.4, 122.8 (d,  $J = 8.8$  Hz), 117.7, 117.5;  $^{19}\text{F}$  NMR (376 MHz,  $\text{CDCl}_3$ )  $\delta$  –99.67; **Minor isomer 3x'**:  $^1\text{H}$  NMR (500 MHz,  $\text{CDCl}_3$ )  $\delta$  6.96 (d,  $J = 7.5$  Hz, 0.27H);  $^{13}\text{C}\{^1\text{H}\}$  NMR (126 MHz,  $\text{CDCl}_3$ )  $\delta$  130.4 (d,  $J = 6.3$  Hz), 129.9, 129.4, 128.7, 127.4, 127.0 (d,  $J = 10.1$  Hz), 112.9, 112.7;  $^{19}\text{F}$  NMR (376 MHz,

CDCl<sub>3</sub>)  $\delta$ -100.47; IR (Neat)  $\nu_{\max}$  1586, 1522, 1486, 1370, 1317, 1190, 1123, 1089, 1026, 852 cm<sup>-1</sup>; **HRMS (ESI)** for C<sub>35</sub>H<sub>22</sub>BrFNS (M+H)<sup>+</sup>: calcd. 586.0635, found 586.0637.

As **3x** and **3x'** are inseparable, thus, independent proton counts for major isomer **3x** and minor isomer **3x'** does not properly match. Ratio of the both regioisomers **3x:3x'** was determined based on the characteristic  $F^{19}$  integration.  $F^{19}$  NMR (376 MHz, CDCl<sub>3</sub>) for **3x/3x'**:  $\delta$  = -99.67 (1.00; major)/ -100.47 (0.07; minor).

#### 5-(Anthracen-9-yl)-2,3,7,8-tetraphenylthiopyrano[4,3,2-ij]isoquinoline (**3y**):

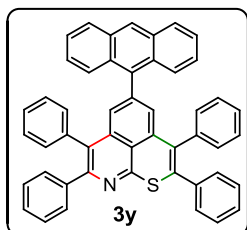

**3y** (139 mg, 70%); yellow crystalline solid. mp = >350 °C; <sup>1</sup>H NMR (500 MHz, CDCl<sub>3</sub>)  $\delta$  8.40 (s, 1H), 7.96 (d,  $J$  = 8.5 Hz, 2H), 7.60 (d,  $J$  = 8.5 Hz, 2H), 7.43–7.38 (m, 2H), 7.37–7.29 (m, 5H), 7.23–7.15 (s, 12H), 7.14–7.06 (m, 5H), 7.10–6.95 (m, 1H), 6.94 (bd,  $J$  = 1.5 Hz, 1H); <sup>13</sup>C{<sup>1</sup>H} NMR (126 MHz, CDCl<sub>3</sub>)  $\delta$  158.5, 151.3, 141.9, 140.1, 137.9, 137.4, 137.1, 136.9, 136.7, 136.0, 132.1, 131.2, 131.0, 130.6, 130.1, 129.7, 129.4, 128.59, 128.58, 128.3, 128.1, 128.0, 127.6, 127.3, 127.2, 127.1, 126.9, 126.7, 126.3, 125.8, 125.5, 125.1, 123.6; IR (Neat)  $\nu_{\max}$  1597, 1536, 1440, 1332, 1259, 1205, 1071, 1026, 888 cm<sup>-1</sup>; **HRMS (ESI)** for C<sub>49</sub>H<sub>32</sub>NS (M+H)<sup>+</sup>: calcd. 666.2250, found 666.2251.

#### 5-(9H-carbazol-9-yl)-2,3,7,8-tetraphenylthiopyrano[4,3,2-ij]isoquinoline (**3z**):

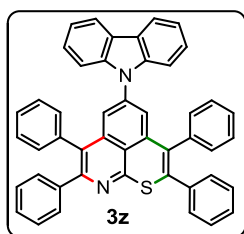

**3z** (166 mg, 84%); yellow colour solid; mp = 284–286 °C; <sup>1</sup>H NMR (400 MHz, CDCl<sub>3</sub>)  $\delta$  8.04 (bd,  $J$  = 7.6 Hz, 2H), 7.45–7.40 (m, 3H), 7.37–7.30 (m, 7H), 7.29–7.27 (m, 2H), 7.25–7.17 (m, 13H), 7.11 (bt,  $J$  = 6.4 Hz, 2H), 7.05 (bd,  $J$  = 2.0 Hz, 1H); <sup>13</sup>C{<sup>1</sup>H} NMR (126 MHz, CDCl<sub>3</sub>)  $\delta$  158.4, 151.3, 140.2, 139.8, 139.7, 139.5, 139.0, 137.8, 137.3, 137.0, 131.9, 130.8, 130.5, 130.0, 129.4, 128.82, 128.79, 128.2, 128.1, 127.62, 127.58, 127.5, 127.0, 125.9, 123.6, 122.7, 121.4, 120.4, 120.2, 119.5, 109.6; IR (Neat)  $\nu_{\max}$  2960, 1598, 1535, 1485, 1441, 1376, 1310, 1225, 1198, 1127, 1070, 990; cm<sup>-1</sup>; **HRMS (ESI)** for C<sub>47</sub>H<sub>31</sub>N<sub>2</sub>S (M+H)<sup>+</sup>: calcd.: 655.2202; found: 655.2201.

## Synthesis of 6,6-fused bis-thiopyrano-isoquinoline via direct double-annulation of 1aa or 1bb with diphenyl acetylene (2a) (GP-4B):

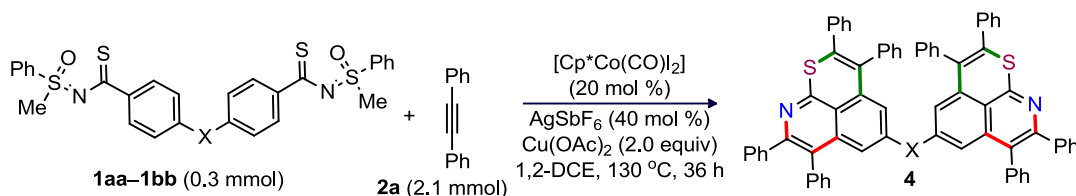

The annulation reactions were carried out in a 15 mL screw capped tube. The tube was charged with freshly prepared **1aa** or **1bb** (0.3 mmol), diphenyl acetylene (**2a**, 2.1 mmol),  $[\text{Cp}^*\text{Co}(\text{CO})\text{I}_2]$  (29 mg, 20 mol %), and  $\text{Cu}(\text{OAc})_2$  (108 mg, 0.6 mmol). Subsequently,  $\text{AgSbF}_6$  (41 mg, 40 mol %) was introduced in to the tube in a glove box. Freshly dried 1,2-DCE (3.0 mL) was added to the mixture and the resulting mixture was stirred at 130 °C in a heating block for 36 h. The reaction mixture was cooled to ambient temperature, filtered through a small plug of Celite and then washed with dichloromethane ( $3 \times 10$  mL). The solvents were evaporated under reduced pressure and the crude material was purified using column chromatography on neutral alumina (5–20% *n*-hexane/EtOAc eluent) to give the desired product.

### **2,2',3,3',7,7',8,8'-octaphenyl-5,5'-bithiopyrano[4,3,2-ij]isoquinoline (4a):**

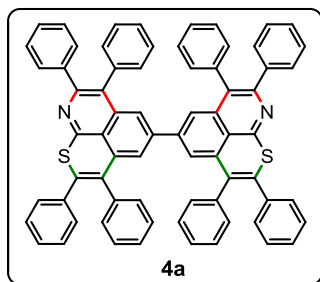

The solubility of compound **4a** in chloroform/DMSO is poor. **4a** (153 mg, 52%); yellow crystalline solid; mp = 333–334 °C;  $^1\text{H}$  NMR (500 MHz,  $\text{CDCl}_3$ )  $\delta$  7.58 (bd,  $J = 8.5$  Hz, 2H), 7.42 (bd,  $J = 1.5$  Hz, 1H), 7.40–7.27 (m, 16H), 7.25–7.21 (m, 10H), 7.20–7.14 (m, 14H), 6.99 (d,  $J = 2.0$  Hz, 1H);  $^{13}\text{C}\{^1\text{H}\}$  NMR (101 MHz,  $\text{CDCl}_3$ )  $\delta$  158.4, 151.5, 144.9, 141.4, 139.9, 138.3, 137.8, 137.5, 137.2, 132.6, 132.0, 131.1, 130.8, 130.0, 129.4, 128.84, 128.82, 128.1, 127.8, 127.6, 127.5, 127.4, 123.6, 122.0, 121.6, 118.6, 111.6; IR (Neat)  $\nu_{\text{max}}$  3449, 3054, 2916, 1594, 1532, 1441, 1306, 1220, 1177, 1030, 901  $\text{cm}^{-1}$ ; **HRMS (ESI)** for  $\text{C}_{70}\text{H}_{45}\text{N}_2\text{S}_2$  (M+H) $^+$ : calcd. 977.3019; found: 977.3017.

### **5,5'-Oxybis(2,3,7,8-tetraphenylthiopyrano[4,3,2-ij]isoquinoline) (4b):**

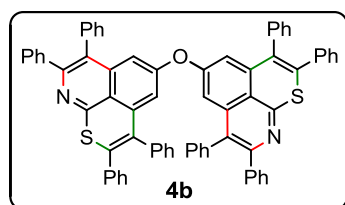

**4b** (181 mg, 61%); yellow crystalline solid. mp = >350 °C;  $^1\text{H}$  NMR (500 MHz,  $\text{CDCl}_3$ )  $\delta$  7.34–7.26 (m, 11H), 7.22–7.20 (m, 21H), 7.05 (d,  $J = 6.5$  Hz, 4H), 6.98 (d,  $J = 7.0$  Hz, 4H), 6.60 (bd,  $J = 2.0$  Hz, 2H), 6.29 (d,  $J = 2.0$  Hz, 2H);  $^{13}\text{C}\{^1\text{H}\}$  NMR (126 MHz,  $\text{CDCl}_3$ )  $\delta$  158.0, 157.9, 151.2, 139.9, 139.7, 139.3, 137.6, 137.2, 137.15, 137.08, 131.6, 130.9, 130.6, 130.0,

129.4, 128.7, 128.6, 128.2, 128.1, 127.6, 127.4, 126.6, 121.3, 115.7, 110.0; IR (Neat)  $\nu_{\max}$  1593, 1562, 1531, 1461, 1441, 1373, 1309, 1197, 1171, 1071, 1030, 992  $\text{cm}^{-1}$ ; HRMS (ESI) for  $\text{C}_{70}\text{H}_{45}\text{N}_2\text{OS}_2$  (M+H)<sup>+</sup>: calcd. 993.2968, found 993.2973.

**Synthesis of 6,6-fused thiopyrano-isoquinoline via direct double-annulation of *N*-[arenethioyl]-*S*-methyl-*S*-phenylsulfoximine (1) with various 1,2-diaryl alkyne (2) (GP-4C):**

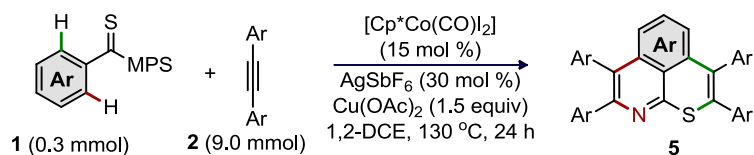

The annulation reactions were carried out in a 15 mL screw capped tube. The tube was charged with freshly prepared *N*-[arenethioyl]-*S*-methyl-*S*-phenylsulfoximine (**1**, 0.3 mmol), 1,2-diaryl alkyne (**2**, 0.9 mmol),  $[\text{Cp}^*\text{Co}(\text{CO})_2]$  (21.5 mg, 15 mol %), and  $\text{Cu}(\text{OAc})_2$  (81 mg, 0.45 mmol). Subsequently,  $\text{AgSbF}_6$  (31 mg, 30 mol %) was introduced in to the tube in a glove box. Freshly dried 1,2-DCE (2.0 mL) was added to the reaction and the resulting mixture was stirred at 130 °C in a heating block for 24 h. The reaction mixture was cooled to ambient temperature, filtered through a small plug of Celite and then washed with dichloromethane ( $3 \times 10$  mL). The solvents were evaporated under reduced pressure and the crude material was purified using column chromatography on neutral alumina (5–10% *n*-hexane/EtOAc eluent) to give the desired product.

**2,3,7,8-Tetrakis(4-methoxyphenyl)-5-methylthiopyrano[4,3,2-ij]isoquinoline (5a):**

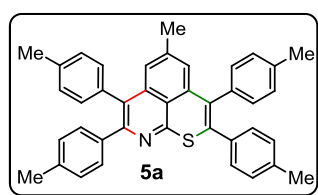

**5a** (157 mg, 93%); yellow crystalline solid. mp = 288–289 °C;  $^1\text{H}$  NMR (500 MHz,  $\text{CDCl}_3$ )  $\delta$  7.22 (bd,  $J = 8.0$  Hz, 2H), 7.17 (bd,  $J = 8.0$  Hz, 2H), 7.11–7.05 (m, 6H), 7.01–7.04 (m, 7H), 6.60 (bd,  $J = 1.0$  Hz, 1H), 2.39 (s, 3H), 2.32 (s, 3H), 2.27 (s, 3H), 2.25 (s, 3H), 2.14 (s, 3H);  $^{13}\text{C}\{^1\text{H}\}$  NMR (101MHz,  $\text{CDCl}_3$ )  $\delta$  158.0, 150.6, 141.1, 138.2, 137.6, 136.8, 136.7, 136.60, 136.58, 136.0, 135.0, 134.84, 134.80, 131.7, 131.0, 130.7, 130.0, 129.3, 128.7, 128.2, 126.3, 124.8, 122.6, 122.5, 22.3, 21.31, 21.25, 21.20, 21.15; IR (Neat)  $\nu_{\max}$  2915, 1737, 1604, 1502, 1443, 1372, 1314, 1212, 1106, 1020, 994  $\text{cm}^{-1}$ ; HRMS (ESI) for  $\text{C}_{40}\text{H}_{34}\text{NS}$  (M+H)<sup>+</sup>: calcd. 560.2406, found 560.2403.

### 2,3,7,8-Tetrakis(4-(*tert*-butyl)phenyl)-5-methylthiopyrano[4,3,2-*ij*]isoquinoline (**5b**):

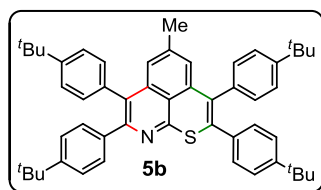

**5b** (179 mg, 82%); yellow crystalline solid. mp = >350 °C; <sup>1</sup>H NMR (500 MHz, CDCl<sub>3</sub>) δ 7.36 (d, *J* = 8.0 Hz, 2H), 7.25–7.19 (m, 4H), 7.15 (bd, *J* = 8.5 Hz, 2H), 7.14–7.10 (m, 4H), 7.08–7.03 (m, 3H), 7.00 (bd, *J* = 8.0 Hz, 2H), 6.74 (bs, 1H), 2.19 (s, 3H), 1.35 (s, 9H), 1.27 (s, 9H), 1.24 (s, 9H), 1.22 (s, 9H); <sup>13</sup>C{<sup>1</sup>H} NMR (101MHz, CDCl<sub>3</sub>) δ 158.0, 150.6, 150.0, 149.9, 149.8, 141.2, 138.1, 137.4, 136.5, 136.0, 134.9, 134.7, 131.9, 130.7, 130.8, 130.6, 129.6, 129.1, 126.4, 125.3, 125.2, 124.8, 124.6, 124.3, 122.6, 122.5, 34.5, 34.44, 34.36, 31.4, 31.3, 31.2, 31.1, 22.3; IR (Neat) ν<sub>max</sub> 2955, 2901, 1605, 1553, 1503, 1459, 1390, 1361, 1268, 1110, 1020, 858 cm<sup>-1</sup>; HRMS (ESI) for C<sub>52</sub>H<sub>58</sub>NS (M+H)<sup>+</sup>: calcd. 728.4284, found 728.4285.

### 2,3,7,8-Tetrakis(4-fluorophenyl)-5-methylthiopyrano[4,3,2-*ij*]isoquinoline (**5c**):

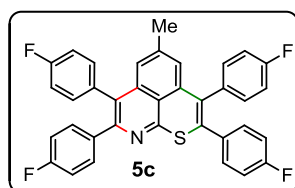

**5c** (95 mg, 55%); yellow crystalline solid. mp = 334–335 °C; <sup>1</sup>H NMR (400 MHz, CDCl<sub>3</sub>) δ 7.27 (s, 1H), 7.25–7.22 (m, 1H), 7.16–6.95 (m, 11H), 6.92–6.83 (m, 4H), 6.58 (d, *J* = 1.0 Hz, 1H), 2.18 (s, 3H); <sup>13</sup>C{<sup>1</sup>H} NMR (101MHz, CDCl<sub>3</sub>) δ 163.3, 160.9, 160.8, 160.6, 158.1, 150.0, 141.8, 138.0, 136.3, 135.9, 135.6, 133.3, 133.2, 133.1, 132.7, 132.6, 132.5, 132.4, 131.8, 131.7, 131.3, 131.2, 125.6, 125.1, 122.6, 116.0, 115.8, 115.5, 115.2, 114.7, 114.5, 22.3 (*The* <sup>13</sup>C NMR is complex due to the presence of four F-atoms on the periphery of arene moiety; it is therefore difficult to assign the corresponding peaks of <sup>13</sup>C-attached to the fluorine-bearing arenes. Hence, complete list of the representative peaks of <sup>13</sup>C is shown); <sup>19</sup>F NMR (376 MHz, CDCl<sub>3</sub>) δ -112.44, -114.01, -114.26, -114.54; IR (Neat) ν<sub>max</sub> 2920, 1599, 139, 1501, 1388, 1314, 1220, 1156, 1064, 996, 899 cm<sup>-1</sup>; HRMS (ESI) for C<sub>36</sub>H<sub>22</sub>F<sub>4</sub>NS (M+H)<sup>+</sup>: calcd. 576.1404, found 576.1396.

### 5-Methyl-2,3,7,8-tetra-*m*-tolylthiopyrano[4,3,2-*ij*]isoquinoline (**5d**):

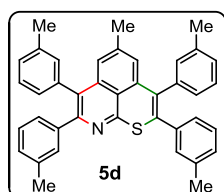

**5d** (132 mg, 79%); yellow crystalline solid. mp = 225–227 °C; <sup>1</sup>H NMR (400 MHz, CDCl<sub>3</sub>) δ 7.25–7.21 (m, 2H), 7.17 (bt, *J* = 7.75 Hz, 1H), 7.12 (bd, *J* = 8.0 Hz, 1H), 7.05–6.89 (m, 13H), 6.63 (bs, 1H), 2.32 (s, 3H), 2.28 (s, 3H), 2.25 (s, 3H), 2.22 (s, 3H), 2.17 (s, 3H); <sup>13</sup>C{<sup>1</sup>H} NMR (101MHz, CDCl<sub>3</sub>) δ 158.0, 150.5, 141.2, 140.0, 138.02, 137.98, 137.8, 137.6, 137.4, 137.3, 136.9, 136.5, 135.9, 131.8, 131.7, 131.4, 130.7, 130.1, 128.6, 128.4, 128.3, 128.2, 127.9, 127.83, 127.78, 127.7, 127.14, 127.1, 126.6, 126.5, 125.0, 122.60, 122.57, 22.3, 21.5, 21.4, 21.2; IR (Neat) ν<sub>max</sub> 2915, 1606, 1559, 1533, 1481, 1370, 1333, 1313, 1234, 1150, 1092, 988, 957 cm<sup>-1</sup>; HRMS (ESI) for C<sub>40</sub>H<sub>34</sub>NS (M+H)<sup>+</sup>: calcd. 560.2406, found 560.2406.

### 5-Methyl-2,3,7,8-tetra(thiophen-2-yl)thiopyrano[4,3,2-ij]isoquinoline (**5e**):

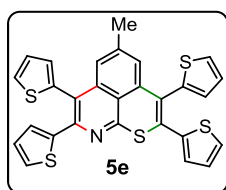

**5e** (55 mg, 35%); gray crystalline solid. mp = 321–322 °C;  $^1\text{H}$  NMR (500 MHz,  $\text{CDCl}_3$ )  $\delta$  7.57 (bd,  $J = 4.5$  Hz, 1H), 7.48 (bd,  $J = 5.0$  Hz, 1H), 7.29–7.21 (m, 4H), 7.14 (bt,  $J = 4.0$  Hz, 1H), 7.02 (dd,  $J = 10.75$  & 2.75 Hz, 2H), 6.96 (s, 1H), 6.92 (bt,  $J = 4.25$  Hz, 1H), 6.87 (bt,  $J = 4.25$  Hz, 1H), 6.74 (bt,  $J = 4.25$  Hz, 2H), 2.20 (s, 3H);  $^{13}\text{C}$   $\{^1\text{H}\}$  NMR (126MHz,  $\text{CDCl}_3$ )  $\delta$  158.1, 145.6, 143.7, 142.0, 139.1, 138.5, 137.9, 137.8, 136.5, 132.0, 130.2, 128.93, 128.86, 128.5, 128.1, 128.0, 127.9, 127.8, 127.7, 127.6, 127.4, 126.3, 125.5, 123.5, 123.0, 121.4, 116.3, 22.4; IR (Neat)  $\nu_{\text{max}}$  3094, 1600, 1519, 1456, 1431, 1370, 1305, 1229, 1175, 1135, 1038  $\text{cm}^{-1}$ ; HRMS (ESI) for  $\text{C}_{28}\text{H}_{18}\text{NS}_5$  ( $\text{M}+\text{H}$ ) $^+$ : calcd. 528.0037, found 528.0040.

### Methyl 2,3,7,8-tetra-*p*-tolylthiopyrano[4,3,2-ij]isoquinoline-5-carboxylate (**5f**):

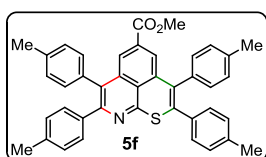

**5f** (108 mg, 60%); yellow crystalline solid. mp = 345–346 °C;  $^1\text{H}$  NMR (500 MHz,  $\text{CDCl}_3$ )  $\delta$  7.93 (bd,  $J = 1.5$  Hz, 1H), 7.38 (bd,  $J = 1.5$  Hz, 1H), 7.23 (d,  $J = 8.0$  Hz, 2H), 7.19 (d,  $J = 8.0$  Hz, 2H), 7.13–7.06 (m, 6H), 7.03–6.95 (m, 6H), 3.74 (s, 3H), 2.40 (s, 3H), 2.32 (s, 3H), 2.28 (s, 3H), 2.26 (s, 3H);  $^{13}\text{C}$   $\{^1\text{H}\}$  NMR (101MHz,  $\text{CDCl}_3$ )  $\delta$  166.6, 158.4, 151.2, 137.85, 137.76, 137.5, 137.05, 136.99, 136.9, 136.8, 134.4, 134.3, 133.8, 131.9, 131.7, 130.8, 130.5, 129.9, 129.5, 129.2, 128.8, 128.3, 127.5, 125.3, 125.0, 122.3, 52.3, 21.33, 21.27, 21.21, 21.16; IR (Neat)  $\nu_{\text{max}}$  2954, 2918, 1722, 1552, 1503, 1435, 1331, 1249, 1180, 1110, 1020, 994  $\text{cm}^{-1}$ ; HRMS (ESI) for  $\text{C}_{41}\text{H}_{34}\text{NO}_2\text{S}$  ( $\text{M}+\text{H}$ ) $^+$ : calcd. 604.2305, found 604.2307.

### Methyl 2,3,7,8-tetrakis(4-fluorophenyl)thiopyrano[4,3,2-ij]isoquinoline-5-carboxylate (**5g**):

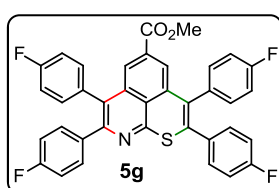

**5g** (135 mg, 73%); yellow crystalline solid. mp = >350 °C;  $^1\text{H}$  NMR (400 MHz,  $\text{CDCl}_3$ )  $\delta$  7.90 (bd,  $J = 1.6$  Hz, 1H), 7.36 (bd,  $J = 1.6$  Hz, 1H), 7.30–7.23 (m, 2H), 7.19–6.99 (m, 10H), 6.89 (t,  $J = 8.8$  Hz, 4H), 3.77 (s, 3H);  $^{13}\text{C}$   $\{^1\text{H}\}$  NMR (101MHz,  $\text{CDCl}_3$ )  $\delta$  166.2, 163.53, 163.49, 163.46, 163.2, 161.05, 161.02, 160.99, 160.8, 158.5, 150.6, 137.6, 137.0, 136.5, 135.42, 135.39, 132.75, 132.73, 132.72, 132.68, 132.60, 132.40, 132.37, 131.8, 131.7, 131.4, 131.2, 131.1, 126.8, 125.4, 125.0, 122.6, 116.3, 116.0, 115.6, 115.3, 114.9, 114.6, 52.52; (The  $^{13}\text{C}$  NMR is complex due to the presence of four F-atoms on the periphery of arene moiety; it is therefore difficult to assign the corresponding peaks of  $^{13}\text{C}$ -attached to the fluorine-bearing arenes. Hence, complete list of the representative peaks of  $^{13}\text{C}$  is shown);  $^{19}\text{F}$  NMR (376 MHz,  $\text{CDCl}_3$ )  $\delta$  -111.95, -113.46, -113.49, -113.86; IR (Neat)  $\nu_{\text{max}}$  3041, 2919, 1721, 1598, 1537, 1500, 1435, 1379, 1258, 1219, 1155, 1090, 998  $\text{cm}^{-1}$ ; HRMS (ESI) for  $\text{C}_{37}\text{H}_{22}\text{F}_4\text{NO}_2\text{S}$  ( $\text{M}+\text{H}$ ) $^+$ : calcd. 620.1302, found 620.1306.

**Methyl 2,3,7,8-tetrakis(4-chlorophenyl)thiopyrano[4,3,2-ij]isoquinoline-5-carboxylate (5h):**

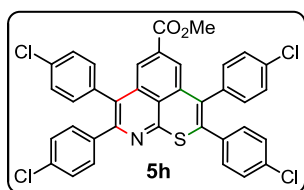

**5i** (149 mg, 73%); yellow crystalline solid. mp = >350 °C. The compound is insoluble in deuterated CHCl<sub>3</sub>, THF, DMSO, MeOH, and CH<sub>3</sub>CN. Thus, it is impossible to record respective <sup>1</sup>H NMR and <sup>13</sup>C NMR spectra; the structure was confirmed by single crystal X-ray analysis; IR (Neat)  $\nu_{\max}$  2923, 2852, 1723, 1631, 1554, 1535, 1554, 1488, 1441, 1398, 1260, 1151, 1089, 1015, 997 cm<sup>-1</sup>; **HRMS (ESI)** for C<sub>37</sub>H<sub>22</sub>Cl<sub>4</sub>NO<sub>2</sub>S (M+H)<sup>+</sup>: calcd. 684.0120, found 684.0120.

**Methyl 2,3,7,8-tetrakis(4-(trifluoromethyl)phenyl)thiopyrano[4,3,2-ij]isoquinoline-5-carboxylate (5i):**

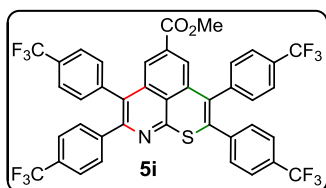

**5i** (161 mg, 66%); yellow crystalline solid. mp = 312–313 °C; <sup>1</sup>H NMR (400 MHz, CDCl<sub>3</sub>)  $\delta$  7.90 (d, *J* = 1.5 Hz, 1H), 7.70 (d, *J* = 8.0 Hz, 2H), 7.61 (d, *J* = 8.0 Hz, 2H), 7.51–7.45 (m, 4H), 7.40 (d, *J* = 8.0 Hz, 2H), 7.38–7.33 (m, 3H), 7.32–7.27 (m, 4H), 3.78 (s, 3H); <sup>13</sup>C{<sup>1</sup>H} NMR (101MHz, CDCl<sub>3</sub>)  $\delta$  165.8, 158.9, 150.3, 142.5, 140.3, 139.8, 137.1, 136.6, 136.4, 132.8, 131.5, 131.4, 131.1, 130.9, 130.7, 130.5, 130.4, 130.3, 130.2, 130.1, 129.8, 129.7, 127.2, 126.20, 126.17, 126.1, 125.6, 125.53, 125.50, 125.3, 125.01, 124.98, 124.87, 124.84, 124.81, 124.63, 123.3, 122.8, 122.7, 122.5, 52.7; (*The <sup>13</sup>C NMR is complex due to the presence of four CF<sub>3</sub>-atoms on the periphery of arene moiety; it is therefore difficult to assign the corresponding peaks of <sup>13</sup>C-attached to the fluorine-bearing arenes. Hence, complete list of the representative peaks of <sup>13</sup>C is shown*); <sup>19</sup>F NMR (376 MHz, CDCl<sub>3</sub>)  $\delta$  -62.59, -62.71, -62.73, -62.93; IR (Neat)  $\nu_{\max}$  2958, 1737, 1616, 1534, 1382, 1316, 1210, 1107, 996, 1068 cm<sup>-1</sup>; **HRMS (ESI)** for C<sub>41</sub>H<sub>22</sub>F<sub>12</sub>NO<sub>2</sub>S (M+H)<sup>+</sup>: calcd. 820.1174, found 820.1175.

**Methyl 2,3,7,8-tetrakis(3-fluorophenyl)thiopyrano[4,3,2-ij]isoquinoline-5-carboxylate (5j):**

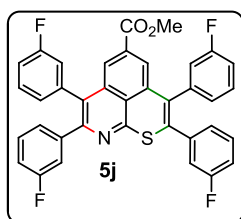

**5j** (155 mg, 84%); yellow crystalline solid. mp = >335 °C; <sup>1</sup>H NMR (500 MHz, CDCl<sub>3</sub>)  $\delta$  7.92 (s, 1H), 7.43–7.36 (m, 2H), 7.31 (q, *J* = 7.2 Hz, 1H), 7.22–7.14 (m, 2H), 7.21–6.89 (m, 11H), 6.84 (d, *J* = 8.5 Hz, 1H), 3.77 (s, 3H); <sup>13</sup>C{<sup>1</sup>H} NMR (126MHz, CDCl<sub>3</sub>)  $\delta$  166.0, 164.1, 163.25, 163.24, 162.1, 161.30, 161.27, 158.7, 150.1, 141.4, 141.3, 138.8, 138.7, 138.5, 138.4, 138.3, 137.3, 136.5, 136.2, 132.5, 131.3, 130.70, 130.67, 130.64, 130.61, 130.03, 129.97, 129.23, 129.17, 127.0, 126.7, 126.4, 125.63, 125.61, 125.5, 125.3, 125.09, 125.07, 123.0, 117.9, 117.8, 117.6, 117.4, 117.0, 116.8, 116.5, 116.3, 115.7, 115.6, 115.2, 115.1, 115.04, 115.0, 114.94, 114.88, 114.7, 52.5; (*The <sup>13</sup>C NMR is complex due to the presence of four F-atoms on the periphery of arene moiety; it is therefore difficult to assign the corresponding peaks of <sup>13</sup>C-attached to the fluorine-bearing arenes. Hence, complete list of the representative peaks of <sup>13</sup>C is shown*); <sup>19</sup>F NMR (376 MHz, CDCl<sub>3</sub>)  $\delta$  -111.71 (d, *J* = 15.0), -111.79



(d,  $J = 15.8$ ),  $-112.11$ ,  $113.43$ ; IR (Neat)  $\nu_{\max}$  2920, 2850, 1724, 1609, 1580, 1557, 1531, 1434, 1332, 1267, 1199, 1173, 1153, 873, 819  $\text{cm}^{-1}$ ; HRMS (ESI) for  $\text{C}_{37}\text{H}_{22}\text{F}_4\text{NO}_2\text{S}$  ( $\text{M}+\text{H}$ ) $^+$ : calcd. 620.1302, found 620.1302.

**Methyl 2,3,7,8-tetrakis(3,4-dimethylphenyl)thiopyrano[4,3,2-ij]isoquinoline-5-carboxylate (5k):**

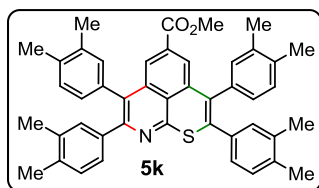

**5k** (148 mg, 75%); yellow crystalline solid. mp = 313–315 °C;  $^1\text{H}$  NMR (500 MHz,  $\text{CDCl}_3$ )  $\delta$  7.91 (bd,  $J = 1.0$  Hz, 1H), 7.37 (bs, 1H), 7.24 (bs, 1H), 7.13 (d,  $J = 7.5$  Hz, 1H), 7.04 (d,  $J = 7.5$  Hz, 1H), 7.02 (bs, 1H), 6.97 (bd,  $J = 6.5$  Hz, 2H), 6.94–6.86 (m, 5H), 6.84 (d,  $J = 7.5$  Hz, 1H), 3.74 (s, 3H), 2.30 (s, 3H), 2.24 (s, 3H), 2.22 (s, 3H), 2.20–2.14 (m, 12H), 2.13 (s, 3H);  $^{13}\text{C}$   $\{^1\text{H}\}$  NMR (126 MHz,  $\text{CDCl}_3$ )  $\delta$  166.8, 158.3, 151.1, 137.8, 137.6, 137.4, 136.73, 136.67, 136.63, 136.4, 136.0, 135.65, 135.61, 135.56, 135.4, 134.9, 134.8, 134.4, 132.0, 131.8, 131.7, 131.6, 131.2, 130.5, 130.0, 129.9, 129.2, 128.6, 128.4, 128.1, 127.6, 127.5, 126.8, 125.2, 125.1, 122.3, 52.3, 19.8, 19.74, 19.70, 19.60, 19.57, 19.55, 19.51, 19.4; IR (Neat)  $\nu_{\max}$  2917, 2852, 1720, 1600, 1552, 1495, 1380, 1228, 1112, 989, 818  $\text{cm}^{-1}$ ; HRMS (ESI) for  $\text{C}_{45}\text{H}_{42}\text{NO}_2\text{S}$  ( $\text{M}+\text{H}$ ) $^+$ : calcd. 660.2931, found 660.2949.

**(5-Methyl-2,8-diphenylthiopyrano[4,3,2-ij]isoquinoline-3,7-diyl)bis(phenylmethanone) (5l)/ minor isomers::**

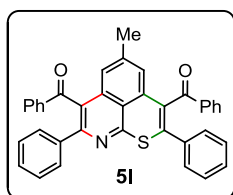

**5l** (108 mg, 65%); yellow solid. mp = 233–235 °C; **Major isomer 5l:**  $^1\text{H}$  NMR (500 MHz,  $\text{CDCl}_3$ )  $\delta$  7.87 (d,  $J = 7.0$  Hz, 2H), 7.73 (d,  $J = 7.0$  Hz, 2H), 7.55 (d,  $J = 7.0$  Hz, 2H), 7.50–7.40 (m, 3H), 7.39–7.35 (m, 2H), 7.34–7.27 (m, 4H), 7.24–7.19 (m, 6H), 6.86 (s, 1H), 2.22 (s, 3H);  $^{13}\text{C}$   $\{^1\text{H}\}$  NMR (126 MHz,  $\text{CDCl}_3$ )  $\delta$  197.7, 196.4, 159.9, 150.6, 143.2, 138.8, 137.7, 137.3, 136.5, 136.1, 135.2, 133.9, 133.6, 133.2, 131.2, 130.3, 129.50, 129.46, 129.36, 129.3, 129.1, 128.62, 128.58, 128.5, 128.2, 125.0, 124.4, 122.4, 121.7, 22.2; IR (Neat)  $\nu_{\max}$  3056, 2920, 1736, 1659, 1595, 1553, 1536, 1489, 1376, 1335, 1309, 1256, 1173, 1073, 999  $\text{cm}^{-1}$ ; HRMS (ESI) for  $\text{C}_{38}\text{H}_{26}\text{NO}_2\text{S}$  ( $\text{M}+\text{H}$ ) $^+$ : calcd. 560.1679, found 560.1684.

**Representative peaks for minor isomers:**

**minor isomers** (25 mg, 15%); yellow solid.  $^1\text{H}$  NMR (500 MHz,  $\text{CDCl}_3$ )  $\delta$  7.88 (d,  $J = 8.5$  Hz, 2H), 7.78 (d,  $J = 9.0$  Hz, 2H), 7.51–7.43 (m, 2H), 7.40–7.28 (m, 10H), 7.27 (s, 1H), 7.23–7.17 (m, 3H), 7.11 (s, 1H), 6.91 (s, 1H), 2.22 (s, 3H);  $^{13}\text{C}$   $\{^1\text{H}\}$  NMR (126 MHz,  $\text{CDCl}_3$ )  $\delta$  196.5, 194.9, 157.7, 149.2, 142.6, 137.9, 137.3, 136.6, 136.5, 135.3, 134.7, 133.9, 133.2, 133.15, 131.06, 130.3, 130.2, 129.5, 129.4, 129.0, 128.64, 128.58, 128.2, 128.0, 127.9, 124.9, 123.6, 123.2, 22.2.



**Methyl 3,7-dimethyl-2,8-diphenylthiopyrano[4,3,2-ij]isoquinoline-5-carboxylate (5m)/ minor isomers:**

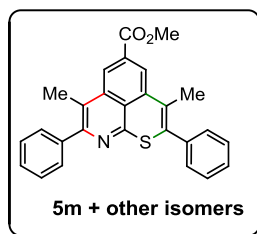

Inseparable mixture of **5m** and **minor isomers** (5:1, 89 mg, 70%); yellow solid. mp = 249–250 °C; **Major isomer 5m**:  $^1\text{H}$  NMR (500 MHz,  $\text{CDCl}_3$ )  $\delta$  8.22 (s, 1H), 7.57–7.49 (m, 5H), 7.48–7.37 (m, 6H), 7.20 (d,  $J = 7.0$  Hz, 2H), 7.16 (bd,  $J = 1.0$  Hz, 1H), 3.84 (s, 3H), 2.45 (s, 3H), 1.91 (s, 3H);  $^{13}\text{C}\{^1\text{H}\}$  NMR (126 MHz,  $\text{CDCl}_3$ )  $\delta$  166.6, 156.1, 152.4, 140.4, 137.9, 137.7, 137.4, 132.7, 132.0, 131.1, 129.8, 129.7, 129.6, 129.4, 128.1, 127.8, 125.0, 122.5, 121.6, 120.9, 52.3, 21.1, 15.7; IR (Neat)  $\nu_{\text{max}}$  3055, 2949, 2921, 1722, 1610, 1563, 1543, 1491, 1437, 1384, 1328, 1308, 1251, 1155, 1117, 1072  $\text{cm}^{-1}$ ; **HRMS (ESI)** for  $\text{C}_{27}\text{H}_{22}\text{NO}_2\text{S}$  ( $\text{M}+\text{H}$ ) $^+$ : calcd. 424.1366, found 424.1377.

**Representative peaks for other isomer**:  $^1\text{H}$  NMR (500 MHz,  $\text{CDCl}_3$ ) 8.37 (s, 0.21H), 7.95 (s, 0.22 H), 4.01 (s, 0.63H), 2.50 (s, 0.61H), 2.13 (s, 0.62H);  $^{13}\text{C}\{^1\text{H}\}$  NMR (126 MHz,  $\text{CDCl}_3$ )  $\delta$  166.8, 156.3, 135.5, 130.0, 129.7, 129.1, 128.71, 128.67, 123.9, 123.3, 119.4, 52.5, 22.8, 17.5.

*As 5m and minor isomers are inseparable, independent protons count for major isomer 5m and minor isomer are not feasible. Ratio of the both regioisomers 5m: minor isomers was determined based on the characteristic Me-H<sup>1</sup> proton integration. H<sup>1</sup> NMR (500 MHz,  $\text{CDCl}_3$ ) H<sup>1</sup> for 5m/minor isomers:  $\delta = 3.84$  (s, 3H, major)/ 4.01 (s, 0.63H, minor).*

**Methyl 2,3,7,8-tetrakis(4-(diphenylamino)phenyl)thiopyrano[4,3,2-ij]isoquinoline-5-carboxylate (5o):**

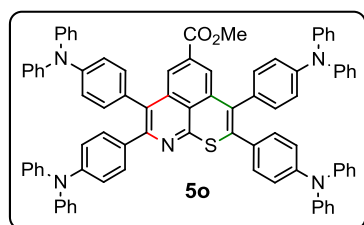

**5o** (281 mg, 77%); yellow crystalline solid; mp = 333–335 °C;  $^1\text{H}$  NMR (400 MHz,  $\text{CDCl}_3$ )  $\delta$  8.12 (d,  $J = 1.2$  Hz, 1H),  $\delta$  7.60 (d,  $J = 1.2$  Hz, 1H), 7.31–7.23 (m, 12H), 7.18–7.00 (m, 40H), 6.96 (d,  $J = 7.75$  Hz, 2H), 6.91 (d,  $J = 7.75$  Hz, 2H), 3.87 (s, 3H);  $^{13}\text{C}\{^1\text{H}\}$  NMR (126 MHz,  $\text{CDCl}_3$ )  $\delta$  166.6, 158.4, 151.2, 147.63, 147.60, 147.53, 147.25, 147.16, 147.11, 146.9, 137.7, 137.4, 136.9, 133.7, 132.0, 131.8, 131.5, 131.0, 130.9, 130.6, 130.3, 129.4, 129.27, 129.23, 127.3, 125.3, 125.0, 124.9, 124.6, 124.4, 124.3, 123.9, 123.8, 123.4, 123.0, 122.93, 122.86, 122.23, 122.15, 121.7, 52.4; IR (Neat)  $\nu_{\text{max}}$  3043, 3016, 2920, 2360, 1722, 1592, 1483, 1456, 1416, 1324, 1279, 1218, 1174, 1109, 894, 847; **HRMS (ESI)** for  $\text{C}_{85}\text{H}_{62}\text{N}_5\text{O}_2\text{S}$  ( $\text{M}+\text{H}$ ) $^+$ : calcd. 1216.4619; found: 1216.7528.

**4,4',4'',4'''-(5-(Anthracen-9-yl)thiopyrano[4,3,2-ij]isoquinoline-2,3,7,8-tetrayl)tetrakis(N,N-diphenylaniline) (5p):**

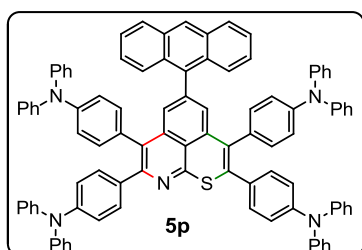

**5p** (259 mg, 65%); yellow crystalline solid. mp = 205–206 °C;  $^1\text{H}$  NMR (500 MHz,  $\text{CDCl}_3$ )  $\delta$  8.51 (s, 1H), 8.06 (d,  $J = 8.5$  Hz, 2H), 7.72 (d,  $J = 8.5$  Hz, 2H), 7.58 (s, 1H), 7.47 (t,  $J = 7.25$  Hz, 2H), 7.36 (t,  $J = 7.75$  Hz, 2H), 7.32–7.22 (m, 8H), 7.19 (bs, 1H), 7.16–6.88 (m, 46H), 6.84 (t,  $J = 8.5$  Hz, 2H);  $^{13}\text{C}\{^1\text{H}\}$  NMR (126 MHz,  $\text{CDCl}_3$ )  $\delta$  158.4, 151.3, 147.6, 147.53, 147.47, 147.3, 146.9, 146.8, 146.7, 141.6, 137.9, 136.8, 136.4, 134.4, 132.0, 131.7, 131.64, 131.56, 131.3, 131.1, 130.3, 129.8, 129.4, 129.2, 129.1, 128.3, 126.9, 126.6, 126.5, 125.6, 125.2, 124.8, 124.5, 124.35, 124.31, 123.6, 123.4, 123.3, 122.9, 122.8, 122.5, 121.9; IR (Neat)  $\nu_{\text{max}}$  1586, 1487, 1312, 1262, 1174, 1074, 1017, 884, 799  $\text{cm}^{-1}$ ; **HRMS (ESI)** for  $\text{C}_{97}\text{H}_{68}\text{N}_5\text{S}$  ( $\text{M}+\text{H}$ ) $^+$ : calcd. 1334.5190, found 1334.5180.

**4,4',4'',4'''-(5-(9H-Carbazol-9-yl)thiopyrano[4,3,2-ij]isoquinoline-2,3,7,8-tetrayl)tetrakis(N,N-diphenylaniline) (5q):**

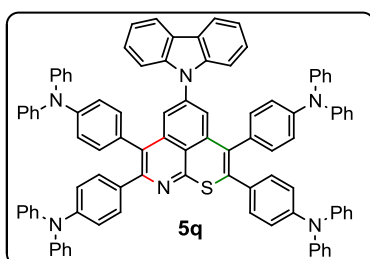

**5q** (326 mg, 82%); yellow crystalline solid; mp = >350 °C;  $^1\text{H}$  NMR (500 MHz,  $\text{CDCl}_3$ )  $\delta$  8.14 (d,  $J = 8.0$  Hz, 2H), 7.56 (bd,  $J = 2.0$  Hz, 1H), 7.42 (d,  $J = 7.5$  Hz, 2H), 7.38–7.27 (m, 12H), 7.23 (bd,  $J = 1.5$  Hz, 1H), 7.21–6.91 (m, 48H);  $^{13}\text{C}\{^1\text{H}\}$  NMR (126 MHz,  $\text{CDCl}_3$ )  $\delta$  158.3, 151.1, 147.8, 147.60, 147.57, 147.53, 147.30, 147.17, 147.09, 147.0, 140.1, 139.8, 139.73, 139.3, 137.6, 133.8, 131.8, 131.7, 131.6, 131.5, 131.3, 131.1, 130.5, 130.4, 129.4, 129.3, 126.4, 126.2, 125.0, 124.6, 124.3, 124.2, 124.1, 124.0, 123.8, 123.5, 123.0, 122.9, 122.8, 122.3, 121.7, 120.6, 120.5, 120.3, 118.7, 109.9; IR (Neat)  $\nu_{\text{max}}$  3054, 2952, 2159, 2028, 1742, 1592, 1535, 1489, 1445, 1312, 1277, 1026, 991, 875, 748, 693, 618  $\text{cm}^{-1}$ ; **HRMS (ESI)** for  $\text{C}_{95}\text{H}_{67}\text{N}_6\text{S}$  ( $\text{M}+\text{H}$ ) $^+$ : calcd. 1323.5142; found: 1323.5148.

**Synthesis of 6,6-fused thiopyrano-isoquinoline (6) via direct double-annulation of *N*-[arenethioyl]-*S*-methyl-*S*-phenylsulfoximine (1) with 1,2-dialkyl alkyne (2) (GP-4D):**

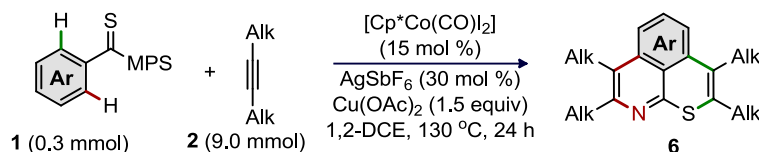

The annulation reactions were carried out in a 15 mL screw capped tube. The tube was charged with freshly prepared **1** (0.3 mmol), 1,2-dialkyl alkyne (**2**, 0.9 mmol), [Cp\*Co(CO)I<sub>2</sub>] (21.5 mg, 15 mol %), and Cu(OAc)<sub>2</sub> (81 mg, 0.45 mmol). Subsequently, AgSbF<sub>6</sub> (31 mg, 30 mol %) was introduced in to the tube in a glove box. Freshly dried 1,2-DCE (2.0 mL) was added to the mixture and the resulting mixture was stirred at 130 °C in a heating block for 24 h. The reaction mixture was cooled to ambient temperature, filtered through a small plug of Celite and then washed with dichloromethane (3 × 10 mL). The solvents were evaporated under reduced pressure and the crude material was purified using column chromatography on neutral alumina (5–10% *n*-hexane/EtOAc eluent) to give the desired product **6**.

**2,3,5,7,8-Pentamethylthiopyrano[4,3,2-ij]isoquinoline (6a):**

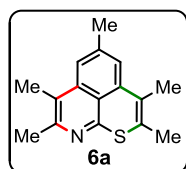

**6a** (39 mg, 52%); pale yellow solid. mp = 188–189 °C; <sup>1</sup>H NMR (500 MHz, CDCl<sub>3</sub>) δ 7.18 (s, 1H), 6.90 (s, 1H), 2.50 (s, 3H), 2.43 (s, 3H), 2.27 (s, 3H), 2.16 (m, 3H), 2.03 (m, 3H); <sup>13</sup>C{<sup>1</sup>H} NMR (126 MHz, CDCl<sub>3</sub>) δ 154.8, 148.5, 140.8, 137.3, 136.1, 128.5, 122.7, 121.6, 119.8, 118.9, 118.8, 22.6, 22.4, 20.6, 15.4, 14.0;

IR (Neat)  $\nu_{\max}$  2918, 2852, 1735, 1613, 1541, 1435, 1368, 1299, 1226, 1103, 1073, 971 cm<sup>-1</sup>; **HRMS (ESI)** for C<sub>16</sub>H<sub>18</sub>NS (M+H)<sup>+</sup>: calcd. 256.1154, found 256.1153.

**2,3,7,8-Tetraethyl-5-methylthiopyrano[4,3,2-ij]isoquinoline (6b):**

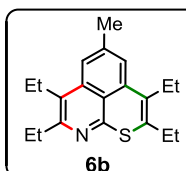

**6b** (65 mg, 70%); yellow crystalline solid. mp = 128–129 °C; <sup>1</sup>H NMR (500 MHz, CDCl<sub>3</sub>) δ 7.29 (s, 1H), 7.04 (s, 1H), 2.86–2.75 (m, 4H), 2.64 (q, *J* = 7.5 Hz, 2H), 2.54–2.48 (m, 2H), 2.47 (s, 3H), 1.31–1.14 (m, 12H); <sup>13</sup>C{<sup>1</sup>H} NMR (126 MHz, CDCl<sub>3</sub>) δ 155.5, 153.6, 140.7, 137.2, 135.6, 135.3, 128.0, 124.2, 122.5, 120.2, 119.1, 28.0, 27.4, 22.7,

21.6, 20.7, 14.4, 14.3, 13.9, 12.8; IR (Neat)  $\nu_{\max}$  2960, 2868, 1610, 1540, 1485, 1389, 1296, 1222, 1094, 987 cm<sup>-1</sup>; **HRMS (ESI)** for C<sub>20</sub>H<sub>26</sub>NS (M+H)<sup>+</sup>: calcd. 312.1780, found 312.1780.

### 5-Methyl-2,3,7,8-tetrapropylthiopyrano[4,3,2-ij]isoquinoline (6c):

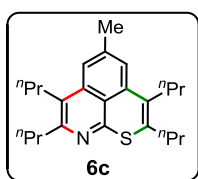

**6c** (80 mg, 73%); yellow crystalline solid. mp = 82–83 °C;  $^1\text{H}$  NMR (500 MHz,  $\text{CDCl}_3$ )  $\delta$  7.25 (s, 1H), 6.99 (s, 1H), 2.74 (q,  $J = 7.75$  Hz, 4H), 2.56 (t,  $J = 7.5$  Hz, 4H), 2.48–2.41 (m, 5H), 1.76–1.51 (m, 8H), 1.09–0.96 (m, 12H);  $^{13}\text{C}\{^1\text{H}\}$  NMR (126 MHz,  $\text{CDCl}_3$ )  $\delta$  155.4, 152.6, 140.5, 137.4, 135.6, 134.6, 127.1, 123.2, 122.4, 120.3, 119.3, 36.9, 36.1, 30.9, 29.8, 23.3, 22.9, 22.75, 22.69, 21.3, 14.4, 14.3, 14.2, 13.9; IR (Neat)  $\nu_{\text{max}}$  2955, 2927, 2869, 1611, 1567, 1454, 1328, 1273, 1087, 1035, 981, 887  $\text{cm}^{-1}$ ; HRMS (ESI) for  $\text{C}_{24}\text{H}_{34}\text{NS}$  ( $\text{M}+\text{H}$ ) $^+$ : calcd. 368.2406, found 368.2407.

### 2,3,7,8-Tetrabutyl-5-methylthiopyrano[4,3,2-ij]isoquinoline (6d):

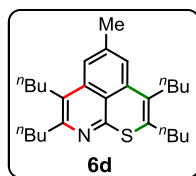

**6d** (90 mg, 71%); orange colour semi solid;  $^1\text{H}$  NMR (500 MHz,  $\text{CDCl}_3$ )  $\delta$  7.28 (s, 1H), 7.03 (s, 1H), 2.82–2.74 (m, 4H), 2.60 (bt,  $J = 6.75$  Hz, 2H), 2.52–2.45 (m, 5H), 1.74–1.41 (m, 16H), 1.02 (bt,  $J = 7.25$  Hz, 6H), 0.98 (bt,  $J = 7.75$  Hz, 6H);  $^{13}\text{C}\{^1\text{H}\}$  NMR (101MHz,  $\text{CDCl}_3$ )  $\delta$  155.3, 152.7, 140.5, 137.4, 135.6, 134.7, 127.1, 123.2, 122.4, 120.2, 119.2, 34.7, 33.8, 32.3, 31.8, 31.6, 30.1, 28.5, 27.4, 23.1, 22.95, 22.92, 22.8, 22.5, 14.0, 13.92, 13.88, 13.81; IR (Neat)  $\nu_{\text{max}}$  2953, 2925, 2857, 1737, 1612, 1566, 1543, 1459, 1375, 1311, 1216, 1102, 1034, 980, 843  $\text{cm}^{-1}$ ; HRMS (ESI) for  $\text{C}_{28}\text{H}_{42}\text{NS}$  ( $\text{M}+\text{H}$ ) $^+$ : calcd. 424.3032, found 424.3032.

### 2,3,7,8-Tetraethylthiopyrano[4,3,2-ij]isoquinoline (6e):

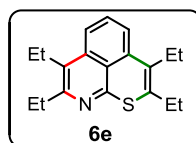

**6e** (76 mg, 85%); pale-yellow crystalline solid. mp = 112–113 °C;  $^1\text{H}$  NMR (400 MHz,  $\text{CDCl}_3$ )  $\delta$  7.56–7.49 (m, 2H), 7.24 (dd,  $J = 6.4$  & 2.4 Hz, 1H), 2.89–2.77 (m, 4H), 2.65 (q,  $J = 7.6$  Hz, 2H), 2.51 (q,  $J = 7.4$  Hz, 2H), 1.32–1.13 (m, 12H);  $^{13}\text{C}\{^1\text{H}\}$  NMR (101MHz,  $\text{CDCl}_3$ )  $\delta$  155.8, 153.1, 136.9, 135.5, 131.0, 128.3, 124.8, 124.1, 119.7, 118.4, 27.8, 27.4, 21.7, 20.7, 14.5, 14.3, 13.8, 12.8; IR (Neat)  $\nu_{\text{max}}$  2965, 2931, 2871, 1609, 1575, 1542, 1375, 1309, 1161, 1055, 984, 848  $\text{cm}^{-1}$ ; HRMS (ESI) for  $\text{C}_{19}\text{H}_{24}\text{NS}$  ( $\text{M}+\text{H}$ ) $^+$ : calcd. 298.1624, found 298.1630.

### 2,3,7,8-Tetraethyl-5-phenoxythiopyrano[4,3,2-ij]isoquinoline (6f):

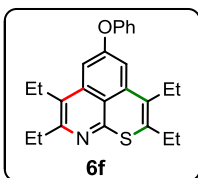

**6f** (95 mg, 81%); yellow crystalline solid; mp = 80–81 °C;  $^1\text{H}$  NMR (400 MHz,  $\text{CDCl}_3$ )  $\delta$  7.42–7.35 (m, 2H), 7.17 (t,  $J = 7.6$  Hz, 1H), 7.09 (d,  $J = 7.6$  Hz, 2H), 6.95 (d,  $J = 5.6$  Hz, 2H), 2.78 (q,  $J = 7.6$  Hz, 2H), 2.68 (q,  $J = 7.6$  Hz, 2H), 2.57 (q,  $J = 7.6$  Hz, 2H), 2.52 (q,  $J = 7.6$  Hz, 2H), 1.29–1.22 (m, 6H), 1.15–1.06 (m, 6H);  $^{13}\text{C}\{^1\text{H}\}$  NMR (101 MHz,  $\text{CDCl}_3$ )  $\delta$  159.4, 156.3, 155.4, 154.2, 138.9, 138.3, 137.2, 129.9, 128.0, 124.4, 123.8, 121.1, 119.3, 111.1, 106.4, 28.1, 27.5, 21.8, 20.9, 14.44, 14.37, 13.6, 12.6; IR (Neat)

$\nu_{\max}$  2960, 2927, 2868, 1609, 1592, 1542, 1486, 1390, 1295, 1212, 1177, 1121, 1021, 977  $\text{cm}^{-1}$ ;  
**HRMS (ESI)** for  $\text{C}_{25}\text{H}_{28}\text{NOS}$  ( $\text{M}+\text{H}$ )<sup>+</sup>: calcd. 390.1886, found 390.1885.

**2,3,7,8-Tetrapropyl-5-(trifluoromethoxy)thiopyrano[4,3,2-ij]isoquinoline (6g):**

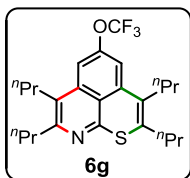

**6g** (95 mg, 83%); yellow crystalline solid; mp = 223–224 °C; <sup>1</sup>H NMR (500 MHz,  $\text{CDCl}_3$ )  $\delta$  7.24 (s, 1H), 6.96 (s, 1H), 2.75 (q,  $J$  = 8.25 Hz, 4H), 2.55 (bt,  $J$  = 8.0 Hz, 2H), 2.49 (t,  $J$  = 7.75 Hz, 2H), 1.77–1.65 (m, 4H), 1.63–1.52 (s, 4H), 1.09–0.97 (m, 12H); <sup>13</sup>C{<sup>1</sup>H} NMR (126 MHz,  $\text{CDCl}_3$ )  $\delta$  155.6, 154.0, 151.2, 138.9, 138.6, 137.4, 126.9, 123.9, 122.3, 120.8 (q,  $J$  = 257 Hz), 111.5, 109.9, 37.0, 36.2, 31.0, 29.9, 23.2, 23.0, 22.6, 21.0, 14.3, 14.20, 14.18, 13.9; <sup>19</sup>F NMR (376 MHz,  $\text{CDCl}_3$ )  $\delta$  -57.26 IR (Neat)  $\nu_{\max}$  2958, 2928, 2871, 1741, 1610, 1578, 1542, 1451, 1375, 1253, 1213, 1144, 1012, 983  $\text{cm}^{-1}$ ; **HRMS (ESI)** for  $\text{C}_{24}\text{H}_{31}\text{F}_3\text{NOS}$  ( $\text{M}+\text{H}$ )<sup>+</sup>: calcd. 438.2073, found 438.2083.

**2,3,7,8-Tetraethyl-5-phenylthiopyrano[4,3,2-ij]isoquinoline (6h):**

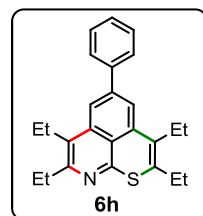

**6h** (94 mg, 84%); yellow crystalline solid; mp = 158–160 °C; <sup>1</sup>H NMR (500 MHz,  $\text{CDCl}_3$ )  $\delta$  7.68 (d,  $J$  = 7.0 Hz, 3H), 7.52 (t,  $J$  = 7.5 Hz, 2H), 7.44 (t,  $J$  = 8.0 Hz, 2H), 2.92 (q,  $J$  = 7.5 Hz, 2H), 2.85 (q,  $J$  = 7.75 Hz, 2H), 2.73 (q,  $J$  = 7.5 Hz, 2H), 2.55 (q,  $J$  = 7.5 Hz, 2H), 1.35–1.20 (m, 12H); <sup>13</sup>C{<sup>1</sup>H} NMR (126 MHz,  $\text{CDCl}_3$ )  $\delta$  155.7, 153.9, 143.6, 141.6, 137.3, 136.3, 136.1, 128.9, 128.3, 127.9, 127.5, 125.0, 123.2, 118.2, 118.0, 28.1, 27.5, 21.8, 20.8, 14.4, 14.3, 14.0, 12.9; IR (Neat)  $\nu_{\max}$  2962, 2926, 1604, 1578, 1542, 1444, 1328, 1258, 1181, 1098, 858, 794  $\text{cm}^{-1}$ ; **HRMS (ESI)** for  $\text{C}_{25}\text{H}_{28}\text{NS}$  ( $\text{M}+\text{H}$ )<sup>+</sup>: calcd. 374.1937, found 374.1943.

**5-Bromo-2,3,7,8-tetraethylthiopyrano[4,3,2-ij]isoquinoline (6i):**

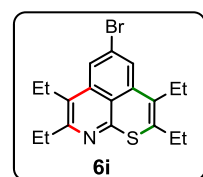

**6i** (97 mg, 86%); light yellow crystalline solid. mp = 151–152 °C; <sup>1</sup>H NMR (400 MHz,  $\text{CDCl}_3$ )  $\delta$  7.63 (bd,  $J$  = 1.6 Hz, 1H), 7.28 (bd,  $J$  = 1.6 Hz, 1H), 2.86–2.75 (m, 4H), 2.62 (q,  $J$  = 7.4 Hz, 2H), 2.53 (q,  $J$  = 7.6 Hz, 2H), 1.30–1.23 (m, 6H), 1.23–1.14 (m, 6H); <sup>13</sup>C{<sup>1</sup>H} NMR (101MHz,  $\text{CDCl}_3$ )  $\delta$  155.9, 154.7, 138.4, 138.0, 137.7, 127.6, 126.8, 124.1, 122.6, 121.9, 121.4, 28.1, 27.6, 21.7, 20.8, 14.3, 13.8, 12.6; IR (Neat)  $\nu_{\max}$  2966, 2931, 2871, 1600, 1565, 1536, 1358, 1308, 1212, 1182, 1054, 987, 897  $\text{cm}^{-1}$ ; **HRMS (ESI)** for  $\text{C}_{19}\text{H}_{23}\text{BrNS}$  ( $\text{M}+\text{H}$ )<sup>+</sup>: calcd. 376.0729, found 376.0736.

**Methyl 2,3,7,8-tetraethylthiopyrano[4,3,2-ij]isoquinoline-5-carboxylate (6j):**

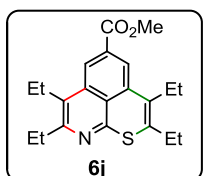

**6j** (83 mg, 78%); yellow crystalline solid; mp = 139–140 °C; <sup>1</sup>H NMR (500 MHz,  $\text{CDCl}_3$ )  $\delta$  8.22 (s, 1H), 7.79 (s, 1H), 3.98 (s, 3H), 2.90 (q,  $J$  = 7.5 Hz, 2H), 2.83 (q,  $J$  = 7.5 Hz, 2H), 2.70 (q,  $J$  = 7.5 Hz, 2H), 2.53 (q,  $J$  = 7.5 Hz, 2H), 1.31–1.16

(m, 12H);  $^{13}\text{C}\{^1\text{H}\}$  NMR (126 MHz,  $\text{CDCl}_3$ )  $\delta$  167.1, 156.0, 154.5, 136.8, 136.7, 136.2, 131.8, 128.4, 126.0, 125.6, 121.9, 117.8, 52.4, 28.0, 27.5, 21.8, 20.8, 14.30, 14.27, 14.2, 12.8; IR (Neat)  $\nu_{\text{max}}$  2961, 2930, 2870, 1719, 1566, 1431, 1251, 1181, 1140, 1004  $\text{cm}^{-1}$ ; **HRMS (ESI)** for  $\text{C}_{21}\text{H}_{26}\text{NO}_2\text{S}$  ( $\text{M}+\text{H}$ ) $^+$ : calcd. 356.1679, found 356.1679.

**2,3,7,8-Tetraethyl-5-nitrothiopyrano[4,3,2-ij]isoquinoline (6k):**

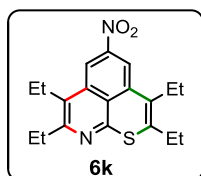

**6k** (98 mg, 95%); red crystalline solid; mp = 163–165 °C;  $^1\text{H}$  NMR (500 MHz,  $\text{CDCl}_3$ )  $\delta$  8.34 (bd,  $J$  = 2.0 Hz, 1H), 7.89 (bd,  $J$  = 1.5 Hz, 1H), 2.89 (d,  $J$  = 6.5 Hz, 2H), 2.85 (q,  $J$  = 7.5 Hz, 2H), 2.71 (q,  $J$  = 7.5 Hz, 2H), 2.57 (q,  $J$  = 7.5 Hz, 2H), 1.32–1.17 (m, 12H);  $^{13}\text{C}\{^1\text{H}\}$  NMR (126 MHz,  $\text{CDCl}_3$ )  $\delta$  156.2, 155.8, 149.4, 139.3, 138.3, 137.1, 128.1, 126.7, 125.6, 115.0, 111.0, 28.1, 27.6, 21.9, 21.0, 14.3, 14.2, 14.1, 12.5; IR (Neat)  $\nu_{\text{max}}$  2964, 1612, 1578, 1520, 1478, 1367, 1309, 1207, 1054  $\text{cm}^{-1}$ ; **HRMS (ESI)** for  $\text{C}_{19}\text{H}_{23}\text{N}_2\text{O}_2\text{S}$  ( $\text{M}+\text{H}$ ) $^+$ : calcd. 343.1475, found 343.1485.

**6-Chloro-2,3,7,8-tetrapropylthiopyrano[4,3,2-ij]isoquinoline (6l):**

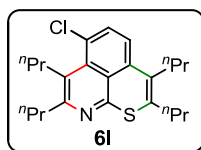

**6l** (86 mg, 75%); light yellow crystalline solid; mp = 89–90 °C;  $^1\text{H}$  NMR (500 MHz,  $\text{CDCl}_3$ )  $\delta$  7.51 (bd,  $J$  = 8.0 Hz, 1H), 7.05 (bd,  $J$  = 8.0 Hz, 1H), 3.17 (bs, 2H), 2.77 (t,  $J$  = 8.0 Hz, 2H), 2.52 (bt,  $J$  = 7.75 Hz, 2H), 2.44 (bt,  $J$  = 7.75 Hz, 2H), 1.77–1.58 (m, 6H), 1.56–1.47 (m, 2H), 1.06–0.98 (m, 12H);  $^{13}\text{C}\{^1\text{H}\}$  NMR (126 MHz,  $\text{CDCl}_3$ )  $\delta$  156.2, 155.3, 135.4, 135.1, 134.61, 134.57, 127.0, 126.4, 125.4, 124.0, 119.3, 37.5, 35.8, 31.2, 31.1, 25.45, 23.4, 22.8, 21.1, 14.3, 14.2, 13.9; IR (Neat)  $\nu_{\text{max}}$  2957, 2927, 2869, 1714, 1634, 1535, 1457, 1374, 1300, 1261, 1204, 1089, 1018  $\text{cm}^{-1}$ ; **HRMS (ESI)** for  $\text{C}_{23}\text{H}_{31}\text{ClNS}$  ( $\text{M}+\text{H}$ ) $^+$ : calcd. 388.1860, found 388.1860.

**5-(9H-Carbazol-9-yl)-2,3,7,8-tetraethylthiopyrano[4,3,2-ij]isoquinoline (6m):**

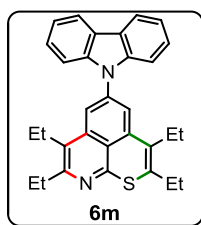

**6m** (112 mg, 81%); yellow crystalline solid; mp = 231–232 °C;  $^1\text{H}$  NMR (500 MHz,  $\text{CDCl}_3$ )  $\delta$  8.21 (d,  $J$  = 7.5 Hz, 2H), 7.72 (bd,  $J$  = 1.5 Hz, 1H), 7.54 (dd,  $J$  = 8.5 & 0.5 Hz, 2H), 7.47 (t,  $J$  = 7.5 Hz, 2H), 7.42 (bd,  $J$  = 1.5 Hz, 1H), 7.35 (t,  $J$  = 7.25 Hz, 2H), 2.94–2.81 (m, 4H), 2.68–2.55 (m, 4H), 1.39–1.29 (m, 6H), 1.24 (t,  $J$  = 7.5 Hz, 3H), 1.85 (t,  $J$  = 7.5 Hz, 3H);  $^{13}\text{C}\{^1\text{H}\}$  NMR (126 MHz,  $\text{CDCl}_3$ )  $\delta$  155.9, 154.7, 140.5, 140.0, 138.4, 138.1, 137.7, 128.0, 126.1, 124.8, 123.6, 123.0, 120.4, 120.2, 117.1, 117.0, 109.7, 28.2, 27.5, 21.8, 20.9, 14.43, 14.39, 14.1, 12.8; IR (Neat)  $\nu_{\text{max}}$  2962, 2868, 1605, 1541, 1481, 1449, 1372, 1258, 1120, 1027, 990  $\text{cm}^{-1}$ ; **HRMS (ESI)** for  $\text{C}_{31}\text{H}_{31}\text{N}_2\text{S}$  ( $\text{M}+\text{H}$ ) $^+$ : calcd. 463.2202, found 463.2208.

## The Direct Double-Annulation of **7** with symmetrical alkyne (**2**) (GP-4E):

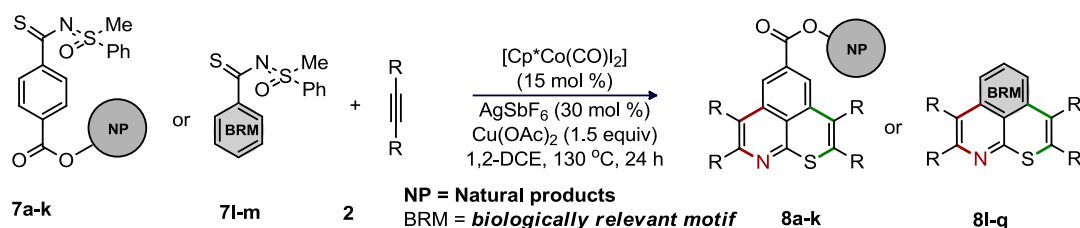

The annulation reactions were carried out in a 15 mL screw capped tube. The tube was charged with freshly prepared **7** (0.3 mmol), symmetrical alkyne (**2**, 0.9 mmol),  $[\text{Cp}^*\text{Co(CO)I}_2]$  (21.5 mg, 15 mol %), and  $\text{Cu(OAc)}_2$  (81 mg, 0.45 mmol). Subsequently,  $\text{AgSbF}_6$  (31 mg, 30 mol %) was introduced in to the tube in a glove box. Freshly dried 1,2-DCE (2.0 mL) was added to the mixture and the resulting mixture was stirred at 130 °C in a heating block for 24 h. The reaction mixture was cooled to ambient temperature, filtered through a small plug of Celite and then washed with dichloromethane ( $3 \times 10$  mL). The solvents were evaporated under reduced pressure and the crude material was purified using column chromatography on neutral alumina (5–10% *n*-hexane/EtOAc eluent) to give the desired product.

### Synthesis of **8a**:

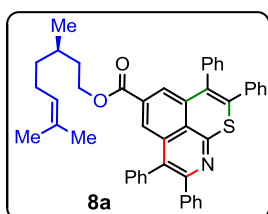

**8a** (149 mg, 74%); yellow crystalline solid; mp = 190–191 °C;  $^1\text{H NMR}$  (500 MHz,  $\text{CDCl}_3$ )  $\delta$  7.96 (bd,  $J = 1.5$  Hz, 1H), 7.39 (bd,  $J = 1.5$  Hz, 1H), 7.38 (bs, 1H), 7.38–7.27 (m, 7H), 7.25 (t,  $J = 1.75$  Hz, 1H), 7.24–7.16 (m, 9H), 7.13 (d,  $J = 8.5$  Hz, 2H), 5.10–4.98 (m, 1H), 4.24–4.13 (m, 2H), 2.00–1.83 (m, 2H), 1.68 (s, 3H), 1.60 (s, 3H), 1.42–1.33 (s, 1H), 1.31–1.22 (m, 2H), 1.18–1.09 (m, 1H), 0.95–0.84 (m, 1H), 0.81 (d,  $J = 8.0$  Hz, 3H);  $^{13}\text{C}\{^1\text{H}\}$  NMR (101 MHz,  $\text{CDCl}_3$ )  $\delta$  165.9, 158.6, 151.3, 139.7, 137.6, 137.2, 137.15, 137.07, 136.8, 136.7, 132.4, 132.1, 131.2, 131.0, 130.7, 130.0, 129.4, 128.7, 128.15, 128.1, 127.9, 127.59, 127.55, 127.4, 125.2, 124.6, 122.6, 63.6, 36.8, 35.0, 29.5, 25.7, 25.4, 19.3, 17.6; IR (Neat)  $\nu_{\text{max}}$  3831, 3435, 3224, 2996, 2763, 2540, 2266, 1622, 1441, 1256, 1122, 1027, 991  $\text{cm}^{-1}$ ; HRMS (ESI) for  $\text{C}_{46}\text{H}_{42}\text{NO}_2\text{S}$  ( $\text{M}+\text{H}$ ) $^+$ : calcd. 672.2931; found: 672.2912.

### Synthesis of **8b**:

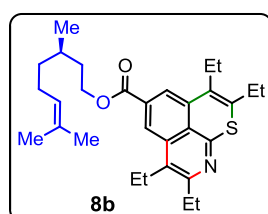

**8b** (115 mg, 80%); yellow crystalline solid; mp = 166–167 °C;  $^1\text{H NMR}$  (500 MHz,  $\text{CDCl}_3$ )  $\delta$  8.23 (s, 1H), 7.81 (s, 1H), 5.12 (bt,  $J = 7.5$  Hz, 1H), 4.46–4.39 (m, 2H), 2.90 (q,  $J = 7.5$  Hz, 2H), 2.83 (q,  $J = 7.5$  Hz, 2H), 2.70 (q,  $J = 7.5$  Hz, 2H), 2.53 (q,  $J = 7.5$  Hz, 2H), 2.08–1.97 (m, 2H), 1.91–1.82



(m, 1H), 1.76–1.63 (m, 6H), 1.62 (s, 3H), 1.49–1.38 (m, 1H), 1.30–1.16 (m, 12H), 1.01 (d,  $J = 6.5$  Hz, 3H);  $^{13}\text{C}\{^1\text{H}\}$  NMR (101 MHz,  $\text{CDCl}_3$ )  $\delta$  166.6, 156.0, 154.4, 136.6, 136.58, 136.0, 132.1, 131.4, 128.3, 125.9, 125.5, 124.5, 121.8, 117.8, 64.0, 37.1, 35.5, 29.9, 28.1, 27.5, 25.7, 25.5, 21.8, 20.8, 19.5, 17.6, 14.4, 14.3, 14.1, 12.7; IR (Neat)  $\nu_{\text{max}}$  2965, 2926, 1722, 1544, 1457, 1259, 1117, 972, 766  $\text{cm}^{-1}$ ; **HRMS (ESI)** for  $\text{C}_{30}\text{H}_{42}\text{NO}_2\text{S}$  ( $\text{M}+\text{H}$ ) $^+$ : calcd. 480.2931; found: 480.2939.

#### Synthesis of 8c:

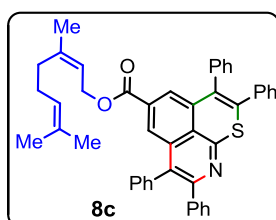

**8c** (60 mg, 30%); orange colour solid; mp = 140–141 °C;  $^1\text{H}$  NMR (500 MHz,  $\text{CDCl}_3$ )  $\delta$  7.95 (bs, 1H), 7.41–7.27 (m, 8H), 7.25–7.15 (m, 11H), 7.13 (bt,  $J = 7.5$  Hz, 2H), 5.27 (bt,  $J = 7.0$  Hz, 1H), 5.06 (bt,  $J = 6.75$  Hz, 1H), 4.65 (bt,  $J = 7.0$  Hz, 2H), 2.10–1.95 (m, 4H), 1.67 (s, 3H), 1.60 (bt,  $J = 5.5$  Hz, 6H);  $^{13}\text{C}$  NMR (500 MHz,  $\text{CDCl}_3$ )  $\delta$  165.9, 158.6, 151.3, 142.9,

139.7, 137.6, 137.2, 137.1, 136.8, 136.7, 132.6, 132.1, 131.8, 131.0, 130.8, 130.0, 129.4, 128.75, 128.73, 128.15, 128.08, 128.0, 127.6, 127.5, 127.4, 125.4, 125.2, 123.7, 122.7, 117.8, 62.0, 39.4, 26.3, 25.6, 17.7, 16.5; IR (Neat)  $\nu_{\text{max}}$  2967, 2926, 2849, 1719, 1604, 1537, 1499, 1379, 1251, 1207, 1119, 1028, 994  $\text{cm}^{-1}$ ; **HRMS (ESI)** for  $\text{C}_{46}\text{H}_{40}\text{NO}_2\text{S}$  ( $\text{M}+\text{H}$ ) $^+$ : calcd. 670.2774, found 670.2745.

#### Synthesis of 8d:

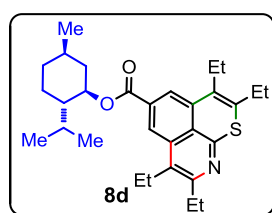

**8d** (111 mg, 77%); yellow crystalline solid; mp = 174–175 °C;  $^1\text{H}$  NMR (500 MHz,  $\text{CDCl}_3$ )  $\delta$  8.23 (s, 1H), 7.83 (s, 1H), 5.00–4.91 (m, 1H), 2.96–2.87 (m, 2H), 2.84 (q,  $J = 7.5$  Hz, 2H), 2.71 (q,  $J = 7.5$  Hz, 2H), 2.54 (q,  $J = 7.5$  Hz, 2H), 2.24–2.17 (m, 1H), 2.02–1.96 (m, 1H), 1.79–1.72 (m, 3H), 1.63–1.58 (m, 1H), 1.32–1.15 (m, 12H), 0.98–0.91 (m, 9H), 0.84 (d,  $J$

= 7.0 Hz, 3H);  $^{13}\text{C}\{^1\text{H}\}$  NMR (101 MHz,  $\text{CDCl}_3$ )  $\delta$  166.0, 156.0, 136.7, 136.5, 136.0, 132.5, 128.4, 126.0, 125.4, 121.8, 118.0, 75.6, 47.3, 40.9, 34.3, 31.4, 27.9, 27.5, 27.0, 24.1, 22.0, 21.8, 20.8, 20.5, 17.1, 14.4, 14.3, 14.1, 12.6; IR (Neat)  $\nu_{\text{max}}$  2958, 2870, 2360, 1716, 1610, 1545, 1454, 1251, 1144, 1097, 980, 766  $\text{cm}^{-1}$ ; **HRMS (ESI)** for  $\text{C}_{30}\text{H}_{42}\text{NO}_2\text{S}$  ( $\text{M}+\text{H}$ ) $^+$ : calcd. 480.2931; found: 480.2930.

#### Synthesis of 8e:

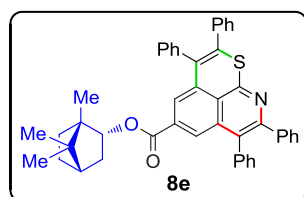

**8e** (132 mg, 66%); pale-yellow crystalline solid. mp = 318–320 °C;  $^1\text{H}$  NMR (500 MHz,  $\text{CDCl}_3$ )  $\delta$  7.98 (bd,  $J = 1.5$  Hz, 1H), 7.42–7.35 (m, 5H), 7.34 (d,  $J = 7.0$  Hz, 1H), 7.30 (t,  $J = 7.5$  Hz, 2H), 7.25–7.17 (m, 11H), 7.15 (d,  $J = 7.5$  Hz, 2H), 4.91 (d,  $J = 9.0$  Hz, 1H), 2.38–2.28 (m,

1H), 1.72–1.66 (m, 1H), 1.65 (bt,  $J = 4.5$  Hz, 1H), 1.57–1.47 (m, 1H), 1.19–1.10 (m, 1H), 1.09–1.00 (m, 1H), 0.96–0.89 (m, 1H), 0.88 (s, 3H), 0.86 (s, 3H), 0.72 (s, 3H);  $^{13}\text{C}\{^1\text{H}\}$  NMR (126 MHz,



CDCl<sub>3</sub>)  $\delta$  165.9, 158.5, 151.1, 139.7, 137.7, 137.3, 137.2, 137.1, 136.82, 136.77, 132.7, 132.1, 131.0, 130.7, 130.1, 129.4, 128.8, 128.7, 128.2, 128.1, 128.0, 127.6, 127.5, 127.43, 127.40, 125.34, 125.2, 122.7, 80.7, 48.9, 47.7, 44.9, 36.7, 27.8, 27.0, 19.6, 18.8, 13.3; IR (Neat)  $\nu_{\max}$  2950, 1716, 1604, 1557, 1533, 1487, 1441, 1386, 1258, 1118, 1074, 992, 898 cm<sup>-1</sup>; **HRMS (ESI)** for C<sub>46</sub>H<sub>40</sub>NO<sub>2</sub>S (M+H)<sup>+</sup>: calcd. 670.2774; found: 670.2781.

### Synthesis of 8f:

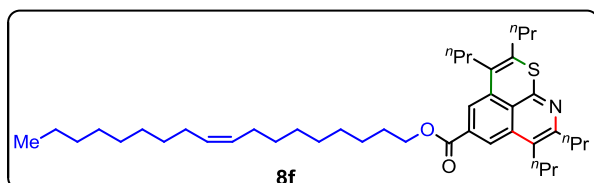

**8f** (144 mg, 74%); pale yellow gummy liquid; <sup>1</sup>H NMR (500 MHz, CDCl<sub>3</sub>)  $\delta$  8.21 (s, 1H), 7.78 (s, 1H), 5.37–5.31 (m, 2H), 4.37 (t, *J* = 6.5 Hz, 2H), 2.84 (bt, *J* = 8.0 Hz, 2H), 2.77 (bt, *J* = 8.0 Hz,

2H), 2.63 (t, *J* = 8.25 Hz, 2H), 2.48 (t, *J* = 8.0 Hz, 2H), 2.04–1.95 (m, 4H), 1.83–1.77 (m, 2H), 1.76–1.67 (m, 4H), 1.64–1.57 (m, 4H), 1.54–1.47 (m, 2H), 1.36–1.23 (m, 20H), 1.11–0.97 (m, 12H), 0.87 (t, *J* = 7.0 Hz, 3H); <sup>13</sup>C{<sup>1</sup>H} NMR (101 MHz, CDCl<sub>3</sub>)  $\delta$  166.6, 155.9, 153.5, 136.8, 136.2, 135.5, 131.9, 129.9, 129.7, 129.1, 127.4, 125.3, 124.9, 122.0, 118.0, 65.4, 36.9, 36.2, 31.9, 31.0, 29.8, 29.7, 29.5, 29.3, 29.2, 28.7, 27.2, 27.1, 26.1, 23.3, 23.1, 23.0, 22.6, 21.2, 14.4, 14.3, 14.2; IR (Neat)  $\nu_{\max}$  2958, 2915, 2848, 2783, 1716, 1654, 1546, 1464, 1248, 1145, 981 cm<sup>-1</sup>; **HRMS (ESI)** for C<sub>42</sub>H<sub>66</sub>NO<sub>2</sub>S (M+H)<sup>+</sup>: calcd. 648.4809; found: 648.4810.

### Synthesis of 8g:

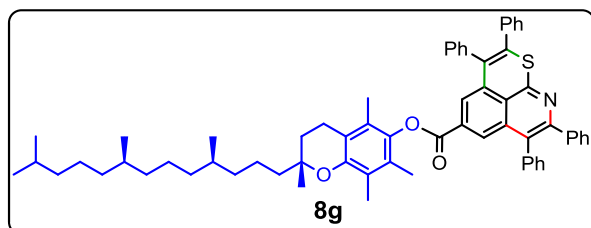

**8g** (202 mg, 73%); orange colour solid. mp = 205–206 °C; <sup>1</sup>H NMR (500 MHz, CDCl<sub>3</sub>)  $\delta$  8.19 (bd, *J* = 1.5 Hz, 1H), 7.60 (bd, *J* = 1.5 Hz, 1H), 7.40–7.14 (m, 20H), 2.57 (bt, *J* = 6.75 Hz, 2H), 2.09 (s, 3H), 1.91 (s, 3H), 1.87 (s, 3H),

1.85–1.73 (m, 2H), 1.60–1.05 (m, 24H), 0.92–8.05 (m, 12H); <sup>13</sup>C NMR (126 MHz, CDCl<sub>3</sub>)  $\delta$  164.5, 158.6, 151.5, 149.4, 140.6, 139.7, 137.8, 137.5, 137.2, 137.13, 137.12, 136.7, 132.4, 132.1, 131.8, 131.0, 130.7, 130.1, 129.4, 128.8, 128.2, 128.1, 128.0, 127.7, 127.60, 127.57, 127.47, 126.7, 125.8, 125.6, 124.9, 123.0, 122.9, 117.4, 75.1, 39.4, 37.54, 37.52, 37.44, 37.38, 37.33, 37.28, 32.8, 32.76, 32.70, 32.68, 31.10, 31.06, 27.9, 24.78, 24.77, 24.4, 22.7, 22.6, 21.0, 20.5, 19.74, 19.67, 19.62, 19.60, 19.56, 12.9; IR (Neat)  $\nu_{\max}$  2921, 2851, 1734, 1566, 1613, 1537, 1459, 1377, 1229, 1203, 1177, 1101, 1060, 930 cm<sup>-1</sup>; **HRMS (ESI)** for C<sub>65</sub>H<sub>72</sub>NO<sub>3</sub>S (M+H)<sup>+</sup>: calcd. 946.5227, found 946.5230.

### Synthesis of 8h:

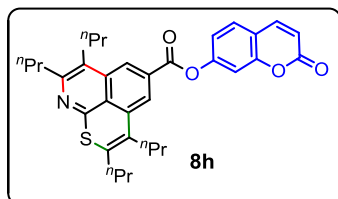

**8h** (104 mg, 64%); yellow solid; mp = 128–129 °C;  $^1\text{H}$  NMR (400 MHz,  $\text{CDCl}_3$ )  $\delta$  8.35 (bd,  $J = 0.8$  Hz, 1H), 7.86 (bd,  $J = 1.2$  Hz, 1H), 7.74 (d,  $J = 9.6$  Hz, 1H), 7.57 (d,  $J = 7.6$  Hz, 1H), 7.31 (d,  $J = 2$  Hz, 1H), 7.24 (d,  $J = 2.4$  Hz, 1H), 6.43 (d,  $J = 9.6$  Hz, 1H), 2.87 (t,  $J = 8.0$  Hz, 2H), 2.79 (t,  $J = 7.8$  Hz, 2H), 2.66 (t,  $J = 8.0$  Hz, 2H), 2.51 (d,  $J = 8.0$  Hz, 2H), 1.80–1.58 (m, 8H), 1.11–1.02 (m, 12H);  $^{13}\text{C}\{^1\text{H}\}$  NMR (101 MHz,  $\text{CDCl}_3$ )  $\delta$  164.6, 160.2, 156.0, 154.8, 154.1, 153.5, 142.8, 136.9, 136.8, 136.4, 130.2, 128.6, 127.3, 125.7, 125.0, 123.0, 118.5, 117.9, 116.8, 116.2, 110.6, 37.0, 36.3, 30.9, 29.8, 23.2, 23.1, 23.0, 21.2, 14.4, 14.3, 14.2, 14.0; IR (Neat)  $\nu_{\text{max}}$  3084, 2955, 2925, 2869, 2359, 1729, 1614, 1540, 1385, 1227, 1122, 984, 887, 751  $\text{cm}^{-1}$ ; **HRMS (ESI)** for  $\text{C}_{33}\text{H}_{36}\text{NO}_4\text{S}$  ( $\text{M}+\text{H}$ ) $^+$ : calcd. 542.2360; found: 542.2367.

### Synthesis of 8i:

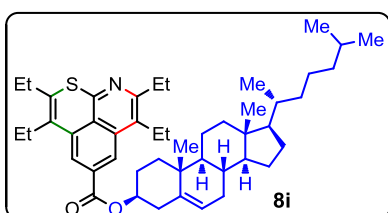

**8i** (156 mg, 73%); yellow crystalline solid; mp = 191–192 °C;  $^1\text{H}$  NMR (500 MHz,  $\text{CDCl}_3$ )  $\delta$  8.21 (s, 1H), 7.81 (s, 1H), 5.44 (s, 1H), 4.93–4.85 (m, 1H), 2.91 (q,  $J = 7.5$  Hz, 2H), 2.83 (q,  $J = 7.5$  Hz, 2H), 2.70 (q,  $J = 7.5$  Hz, 2H), 2.53 (q,  $J = 7.5$  Hz, 4H), 2.08–1.90 (m, 5H), 1.87–1.73 (m, 3H), 1.60–1.44 (m, 6H), 1.40–1.30 (m, 3H), 1.29–1.19 (m, 12H), 1.16–1.04 (m, 9H), 1.03–0.95 (m, 3H), 0.92 (d,  $J = 6.5$  Hz, 3H), 0.86 (dd,  $J = 6.5$  & 2.0 Hz, 6H), 0.68 (s, 3H);  $^{13}\text{C}\{^1\text{H}\}$  NMR (101 MHz,  $\text{CDCl}_3$ )  $\delta$  166.0, 155.9, 154.4, 139.5, 136.6, 136.5, 136.0, 132.4, 128.4, 125.9, 125.5, 122.9, 121.7, 117.9, 75.2, 56.6, 56.1, 50.0, 42.3, 39.7, 39.5, 38.2, 37.0, 36.6, 36.1, 35.8, 31.9, 31.8, 28.2, 28.1, 28.0, 27.9, 27.5, 24.3, 23.8, 22.8, 22.5, 21.8, 21.0; IR (Neat)  $\nu_{\text{max}}$  3612, 3469, 3370, 3317, 3192, 2858, 2573, 2444, 2148, 1631, 1462, 1232, 766  $\text{cm}^{-1}$ ; **HRMS (ESI)** for  $\text{C}_{47}\text{H}_{68}\text{NO}_2\text{S}$  ( $\text{M}+\text{H}$ ) $^+$ : calcd. 710.4985; found: 710.4977.

### Synthesis of 8j:

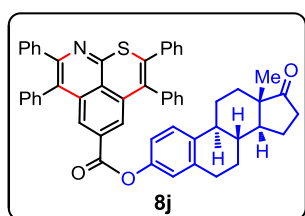

**8j** (166 mg, 72%); light yellow crystalline solid. mp = 235–237 °C;  $^1\text{H}$  NMR (500 MHz,  $\text{CDCl}_3$ )  $\delta$  8.10 (bd,  $J = 1.5$  Hz, 1H), 7.51 (bd,  $J = 1.5$  Hz, 1H), 7.40–7.27 (m, 7H), 7.25–7.12 (m, 14H), 6.84–6.78 (m, 2H), 2.89–2.84 (m, 2H), 2.54–2.46 (m, 1H), 2.43–2.36 (m, 1H), 2.32–2.24 (m, 1H), 2.19–2.09 (m, 1H), 2.08–1.95 (m, 3H), 1.66–1.40 (m, 6H), 0.90 (s, 3H);  $^{13}\text{C}\{^1\text{H}\}$  NMR (126MHz,  $\text{CDCl}_3$ )  $\delta$  164.8, 158.6, 151.5, 148.6, 139.6, 138.0, 137.6, 137.5, 137.4, 137.2, 137.0, 136.6, 132.0, 131.6, 131.0, 130.7, 130.0, 129.4, 128.8, 128.2, 128.1, 128.0, 127.7, 127.54, 127.50, 126.3, 125.8, 125.6, 122.8, 121.5, 118.6, 50.4, 47.9, 44.1, 38.0, 35.8, 31.5, 29.6, 29.3, 26.2, 25.7, 21.5, 13.8; IR (Neat)  $\nu_{\text{max}}$  3338, 2921, 2853, 1719, 1607, 1580, 1494, 1441, 1376, 1247, 1205, 1053, 897  $\text{cm}^{-1}$ ; **HRMS (ESI)** for  $\text{C}_{54}\text{H}_{44}\text{NO}_3\text{S}$  ( $\text{M}+\text{H}$ ) $^+$ : calcd. 786.3036; found: 786.3047.

### Synthesis of 8k:

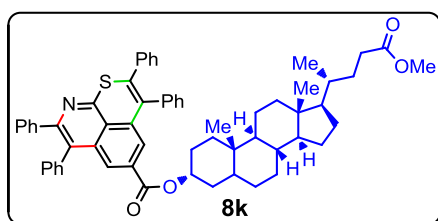

**8k** (201 mg, 70%); yellow solid. mp = 181–182 °C;  $^1\text{H}$  NMR (500 MHz,  $\text{CDCl}_3$ )  $\delta$  7.93 (bd,  $J$  = 1.0 Hz, 1H), 7.41–7.28 (m, 8H), 7.25–7.16 (m, 11H), 7.15 (d,  $J$  = 7.0 Hz, 2H), 4.77–4.67 (m, 1H), 3.67 (s, 3H), 2.41–2.32 (m, 1H), 2.30–2.19 (m, 1H), 1.99 (bd,  $J$  = 11.0 Hz, 1H), 1.93–1.49 (m, 9H), 1.46–1.08 (m,

16H), 0.94 (d,  $J$  = 6.5 Hz, 3H), 0.91 (s, 3H), 0.66 (s, 3H);  $^{13}\text{C}$  NMR (126 MHz,  $\text{CDCl}_3$ )  $\delta$  174.7, 165.4, 158.5, 151.3, 139.7, 137.5, 137.3, 137.1, 137.0, 136.8, 136.7, 133.0, 132.1, 131.1, 130.8, 130.0, 129.4, 128.69, 128.66, 128.15, 128.08, 127.9, 127.6, 127.5, 127.4, 125.4, 125.0, 122.8, 75.6, 56.6, 56.2, 51.4, 42.7, 41.7, 40.4, 40.2, 35.7, 35.4, 34.9, 34.5, 31.9, 31.1, 31.0, 28.2, 26.9, 26.3, 26.2, 24.2, 23.3, 20.8, 18.3, 12.0; IR (Neat)  $\nu_{\text{max}}$  2926, 2852, 1718, 1610, 1531, 1451, 1381, 1321, 1214, 1166, 1124, 991, 908  $\text{cm}^{-1}$ ; **HRMS (ESI)** for  $\text{C}_{61}\text{H}_{64}\text{NO}_4\text{S}$  ( $\text{M}+\text{H}$ ) $^+$ : calcd. 906.4551, found 906.4551.

### 2,3,7,8-Tetraphenyl-*N,N*-dipropylthiopyrano[4,3,2-ij]isoquinoline-5-sulfonamide (**8l**):

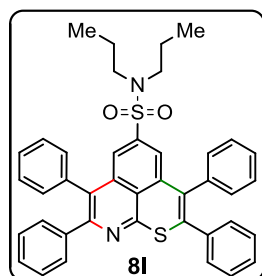

**8l** (142 mg, 60%); yellow crystalline solid. mp = 270–271 °C;  $^1\text{H}$  NMR (500 MHz,  $\text{CDCl}_3$ )  $\delta$  7.67 (bs, 1H), 7.41–7.27 (m, 7H), 7.25–7.14 (m, 11H), 7.11 (d,  $J$  = 8.0 Hz, 2H), 7.05 (bs, 1H), 2.85 (bt,  $J$  = 7.75 Hz, 4H), 1.37 (bq,  $J$  = 7.5 Hz, 4H), 0.76 (t,  $J$  = 7.25 Hz, 6H);  $^{13}\text{C}$   $\{^1\text{H}\}$  NMR (126 MHz,  $\text{CDCl}_3$ )  $\delta$  158.5, 151.9, 142.8, 139.4, 138.4, 138.2, 137.9, 136.9, 136.7, 136.4, 131.7, 130.8, 130.6, 130.0, 129.3, 129.0, 128.9, 128.4, 128.1, 127.9, 127.7, 127.65,

127.62, 124.7, 121.9, 119.4, 49.8, 21.7, 11.1; IR (Neat)  $\nu_{\text{max}}$  3056, 2925, 1555, 1531, 1487, 1457, 1364, 1305, 1148, 1107, 1073, 987  $\text{cm}^{-1}$ ; **HRMS (ESI)** for  $\text{C}_{41}\text{H}_{36}\text{N}_2\text{NaO}_2\text{S}_2$  ( $\text{M}+\text{Na}$ ) $^+$ : calcd. 675.2110, found 675.2125.

### 2,3,7,8-Tetrakis(4-(tert-butyl)phenyl)-*N,N*-dipropylthiopyrano[4,3,2-ij]isoquinoline-5-sulfonamide (**8m**):

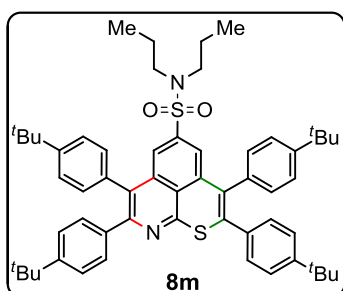

**8m** (104 mg, 40%); yellow crystalline solid. mp = 337–338 °C;  $^1\text{H}$  NMR (500 MHz,  $\text{CDCl}_3$ )  $\delta$  7.72 (bd,  $J$  = 1.5 Hz, 1H), 7.38 (d,  $J$  = 8.0 Hz, 2H), 7.30–7.22 (m, 4H), 7.21–7.14 (m, 4H), 7.13–7.05 (m, 5H), 7.00 (d,  $J$  = 8.0 Hz, 2H), 2.88 (t,  $J$  = 7.75 Hz, 4H), 1.40 (bq,  $J$  = 7.5 Hz, 4H), 1.35 (s, 9H), 1.27 (s, 9H), 1.26 (s, 9H), 1.23 (s, 9H), 0.77 (t,  $J$  = 7.5 Hz, 6H);  $^{13}\text{C}$   $\{^1\text{H}\}$  NMR (126 MHz,  $\text{CDCl}_3$ )  $\delta$  158.3, 151.9,

151.5, 150.6, 150.43, 150.38, 142.6, 138.5, 138.2, 138.0, 136.6, 134.1, 134.0, 133.5, 131.6, 130.5, 130.3, 129.6, 128.9, 127.6, 125.7, 125.5, 124.7, 124.6, 124.4, 121.7, 118.9, 49.9, 34.6, 34.5, 34.4, 31.3, 31.20, 31.18, 31.1, 21.8, 11.1; IR (Neat)  $\nu_{\text{max}}$  2958, 2867, 1590, 1549, 1500, 1461, 1362, 1343,

1326, 1266, 1188, 1152, 1056, 1017, 986  $\text{cm}^{-1}$ ; **HRMS (ESI)** for  $\text{C}_{57}\text{H}_{69}\text{N}_2\text{O}_2\text{S}_2$  ( $\text{M}+\text{H}$ )<sup>+</sup>: calcd. 877.4795, found 877.4800.

### 2,3,7,8-Tetrakis(4-fluorophenyl)-N,N-dipropylthiopyrano[4,3,2-ij]isoquinoline-5-sulfonamide

(**8n**):

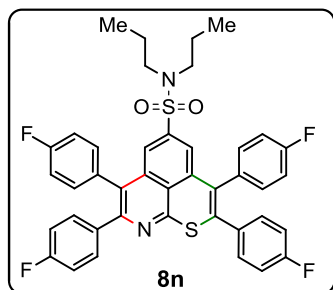

**8n** (174 mg, 80%); yellow crystalline solid. mp = 247–248 °C;  $^1\text{H}$  NMR (500 MHz,  $\text{CDCl}_3$ )  $\delta$  7.64 (bd,  $J = 1.5$  Hz, 1H), 7.31–7.25 (m, 2H), 7.18–7.00 (m, 11H), 6.95–6.87 (m, 4H), 2.87 (bt,  $J = 7.75$  Hz, 4H), 1.42–1.32 (m, 4H), 0.76 (t,  $J = 7.75$  Hz, 6H);  $^{13}\text{C}\{^1\text{H}\}$  NMR (126 MHz,  $\text{CDCl}_3$ )  $\delta$  163.4, 163.34, 163.31, 163.1, 161.42, 161.37, 161.34, 161.1, 158.5, 151.2, 143.2, 138.2, 137.9, 137.8, 135.2, 135.1, 132.8, 132.5, 132.4, 132.3, 132.2, 132.04, 132.01, 131.8, 131.7, 131.2, 131.1, 127.5, 126.8, 124.6, 121.8, 119.4, 116.43, 116.41, 116.3, 116.2, 115.6, 115.4, 114.9, 114.7, 49.6, 21.6, 11.0  $\text{cm}^{-1}$ ; (The  $^{13}\text{C}$  NMR is complex due to the presence of four F-atoms on the periphery of arene moiety; it is therefore difficult to assign the corresponding peaks of  $^{13}\text{C}$ -attached to the fluorine-bearing arenes. Hence, complete list of the representative peaks of  $^{13}\text{C}$  is shown);  $^{19}\text{F}$  NMR (376 MHz,  $\text{CDCl}_3$ )  $\delta$  -111.55, -112.93, -112.96, -113.52; IR (Neat)  $\nu_{\text{max}}$  2970, 2922, 2859, 1595, 1500, 1342, 1222, 1155, 1095, 1010, 988, 833  $\text{cm}^{-1}$ ; **HRMS (ESI)** for  $\text{C}_{41}\text{H}_{33}\text{F}_4\text{N}_2\text{O}_2\text{S}_2$  ( $\text{M}+\text{H}$ )<sup>+</sup>: calcd. 725.1914, found 725.1915.

### N,N,2,3,7,8-Hexapropylthiopyrano[4,3,2-ij]isoquinoline-5-sulfonamide (**8o**):

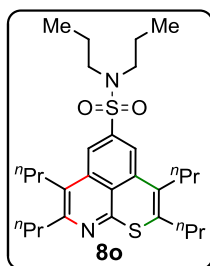

**8o** (114 mg, 73%); yellow crystalline solid. mp = 95–96 °C;  $^1\text{H}$  NMR (126 MHz,  $\text{CDCl}_3$ )  $\delta$  7.93 (bd,  $J = 1.0$  Hz, 1H), 7.45 (bd,  $J = 1.0$  Hz, 1H), 3.12 (t,  $J = 7.75$  Hz, 4H), 2.83 (t,  $J = 8.0$  Hz, 2H), 2.78 (t,  $J = 7.75$  Hz, 2H), 2.61 (t,  $J = 8.0$  Hz, 2H), 2.50 (t,  $J = 8.0$  Hz, 2H), 1.79–1.65 (m, 4H), 1.63–1.51 (m, 8H), 1.09–0.97 (m, 11H), 0.91–0.84 (m, 7H);  $^{13}\text{C}\{^1\text{H}\}$  NMR (126 MHz,  $\text{CDCl}_3$ )  $\delta$  155.8, 154.4, 141.9, 137.5, 137.2, 137.0, 127.1, 124.9, 124.7, 119.0, 114.9, 50.2, 36.3, 30.9, 29.7, 23.2, 23.04, 22.98, 22.1, 21.2, 14.3, 14.23, 14.22, 13.9, 11.1; IR (Neat)  $\nu_{\text{max}}$  2956, 2927, 1603, 1568, 1463, 1366, 1341, 1231, 1159, 1134, 1036, 993  $\text{cm}^{-1}$ ; **HRMS (ESI)** for  $\text{C}_{29}\text{H}_{45}\text{N}_2\text{O}_2\text{S}_2$  ( $\text{M}+\text{H}$ )<sup>+</sup>: calcd. 517.2917, found 517.2927.

### Synthesis of **8p**:

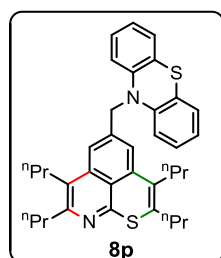

**8p** (122 mg, 72%); pale yellow crystalline solid. mp = 166–168 °C;  $^1\text{H}$  NMR (500 MHz,  $\text{CDCl}_3$ )  $\delta$  7.42 (s, 1H), 7.15 (bd,  $J = 1.0$  Hz, 1H), 7.14–7.11 (m, 2H), 7.03–6.95 (m, 2H), 6.88 (td,  $J = 7.5$  & 1.0 Hz, 2H), 6.69 (dd,  $J = 8.0$  & 0.5 Hz, 2H), 5.19 (s, 2H), 2.72 (t,  $J = 7.25$  Hz, 2H), 2.67 (t,  $J = 8.25$  Hz, 2H), 2.44 (q,  $J = 8.0$  Hz, 4H), 1.74–1.62 (m, 4H), 1.42–1.29 (m, 4H), 1.04–0.97 (m, 6H), 0.93 (t,  $J = 7.25$  Hz, 3H), 0.89 (t,  $J = 7.25$  Hz, 3H);  $^{13}\text{C}\{^1\text{H}\}$  NMR (126MHz,  $\text{CDCl}_3$ )  $\delta$  155.5, 153.0,

144.5, 139.1, 137.4, 136.4, 135.3, 127.4, 127.2, 127.0, 123.8, 123.6, 123.2, 122.7, 117.7, 117.0, 115.6, 52.6, 37.0, 36.2, 31.0, 29.9, 23.3, 23.0, 22.8, 21.2, 14.4, 14.23, 14.20, 14.0; IR (Neat)  $\nu_{\max}$  2953, 2924, 2866, 2360, 1745, 1612, 1544, 1460, 1441, 1358, 1252, 1211, 1005, 863, 739;  $\text{cm}^{-1}$ ; **HRMS (ESI)** for  $\text{C}_{36}\text{H}_{41}\text{N}_2\text{S}_2$  ( $\text{M}+\text{H}$ )<sup>+</sup>: calcd. 565.2706; found: 565.2707.

### **Synthesis of 8q:**

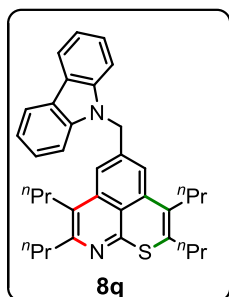

**8q** (135 mg, 85%); pale yellow crystalline solid. mp = 184–186 °C; <sup>1</sup>H NMR (500 MHz,  $\text{CDCl}_3$ )  $\delta$  8.15 (d,  $J$  = 7.5 Hz, 2H), 7.43 (td,  $J$  = 8.5 & 1.0 Hz, 2H), 7.38 (d,  $J$  = 8.0 Hz, 2H), 7.27 (bd,  $J$  = 1.0 Hz, 1H), 7.24 (bd,  $J$  = 1.0 Hz, 1H), 7.12 (s, 1H), 6.78 (s, 1H), 5.64 (s, 2H), 2.69 (t,  $J$  = 7.75 Hz, 2H), 2.54 (t,  $J$  = 8.0 Hz, 2H), 2.37 (t,  $J$  = 7.75 Hz, 2H), 2.23 (t,  $J$  = 8.0 Hz, 2H), 1.70–1.56 (m, 4H), 1.37–1.30 (m, 2H), 1.20–1.12 (m, 2H), 0.96 (t,  $J$  = 7.25 Hz, 6H), 0.83 (t,  $J$  = 7.25 Hz, 3H), 0.69 (t,  $J$  = 7.5 Hz, 3H); <sup>13</sup>C{<sup>1</sup>H} NMR (126MHz,  $\text{CDCl}_3$ )  $\delta$  155.5, 140.5, 137.3, 136.5, 135.2, 127.3, 125.9, 123.7, 123.1, 123.0, 120.4, 119.4, 117.0, 116.5, 108.7, 46.7, 36.1, 30.9, 29.8, 23.34, 23.0, 22.5, 20.9, 14.25, 14.20, 14.0, 13.9; IR (Neat)  $\nu_{\max}$  2952, 2925, 2867, 1730, 1610, 1568, 1484, 1323, 1259, 1207, 1151, 981, 887  $\text{cm}^{-1}$ ; **HRMS (ESI)** for  $\text{C}_{36}\text{H}_{41}\text{N}_2\text{S}$  ( $\text{M}+\text{H}$ )<sup>+</sup>: calcd. 533.2985; found: 533.2997.

### **General procedure for the gram scale synthesis of 3a:**

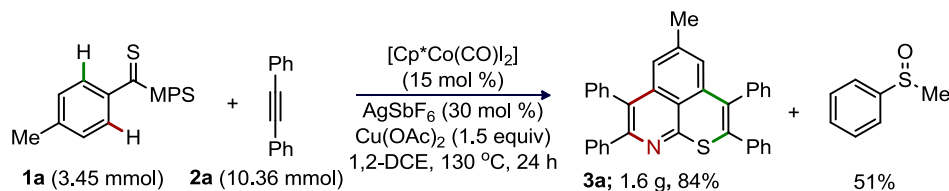

The gram scale reaction was carried out in a 50 mL screw capped tube. The tube was independently charged with *N*-[4-methylbenzothioyl]-*S*-methyl-*S*-phenylsulfoximine (**1a**, 1.00 gram, 3.45 mmol), diphenylacetylene (**2a**, 1.85 gram, 10.36 mmol),  $[\text{Cp}^*\text{Co}(\text{CO})\text{I}_2]$  (0.25 g, 15 mol %), and  $\text{Cu}(\text{OAc})_2$  (0.94 g, 5.18 mmol). Subsequently,  $\text{AgSbF}_6$  (0.35 g, 30 mol %) was introduced in to the tube in a glove box. Freshly prepared 1,2-DCE (20.0 mL) was added to the mixture and the resulting mixture was stirred at 130 °C for 24 h. The reaction mixture was cooled to ambient temperature, filtered through a small plug of Celite and then washed with dichloromethane (3 × 20 mL). The solvents were evaporated under reduced pressure and the crude material was purified using column chromatography on neutral alumina (5–10% *n*-hexane/EtOAc eluent). The **3a** (1.6 g) in 84% yield was isolated along with the isolation of phenyl methyl sulfoxide 51% yield.

### Synthesis of compound 9:

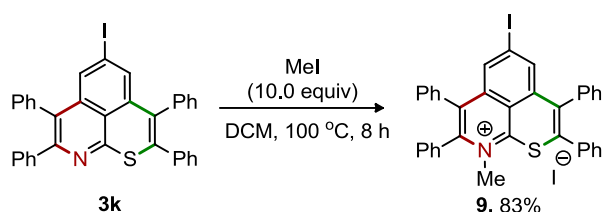

To a solution of **3k** (100 mg, 0.162 mmol) in dry CH<sub>2</sub>Cl<sub>2</sub> (1.5 mL) was added MeI (10.0 equiv, 1.62 mmol) under an argon atmosphere. The resulting mixture was stirred at room temperature for 12 hours. The reaction progress was monitored by TLC. Upon completion of the reaction, the crude mixture was concentrated under reduced pressure. The crude residue was washed three times with hexane/ethyl acetate (2:1, 3 × 5 mL). The compound **9** was obtained 102 mg in 83% yield as brown colour solid.

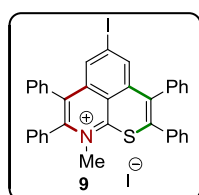

**9** (102 mg, 83%); brown colour solid. mp = >350 °C; <sup>1</sup>H NMR (400 MHz, DMSO-d<sub>6</sub>) δ 7.57 (bd, *J* = 1.2 Hz, 1H), 7.50 (bd, *J* = 1.6 Hz, 1H), 7.47 (bd, *J* = 6.8 Hz, 2H), 7.44–7.38 (m, 13H), 7.37–7.29 (m, 3H), 7.21 (d, *J* = 8.5 Hz, 2H), 3.71 (s, 3H); <sup>13</sup>C{<sup>1</sup>H} NMR (126 MHz, DMSO-d<sub>6</sub>) δ 157.2, 144.4, 135.4, 134.7, 132.9, 132.6, 132.4, 132.2, 132.0, 131.5, 130.7, 129.7, 128.5, 128.2, 128.0, 127.95, 127.89, 127.8, 127.3, 127.0, 126.6, 120.6, 41.5; IR (Neat) ν<sub>max</sub> 1620, 1591, 1553, 1518, 1483, 1445, 1407, 1343, 1229, 1156, 1114, 1070 cm<sup>-1</sup>; HRMS (ESI) for C<sub>36</sub>H<sub>25</sub>INS (M-I)<sup>+</sup>: calcd. 630.0747, found 630.0750.

### 2,3,5,7,8-pentaphenylthiopyrano[4,3,2-ij]isoquinoline 1,1-dioxide (**10**):

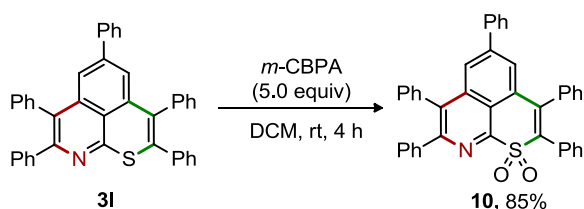

To a solution of **3l** (100 mg, 0.176 mmol) in dry CH<sub>2</sub>Cl<sub>2</sub> (1.5 mL) was added *m*-CBPA (5.0 equiv, 0.88 mmol) under an argon atmosphere. The resulting mixture was stirred at room temperature for 4 hours. The reaction progress was monitored by TLC. Upon completion of the reaction, the crude mixture was concentrated under reduced pressure. The crude residue was purified using column chromatography on silica gel eluting with hexane:ethyl acetate (3:2) to afford **10** (89 mg) in 85% yield as colorless crystalline solid.

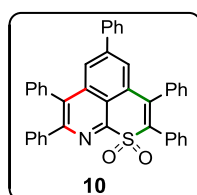

**10** (89 mg, 85%); colorless crystalline solid. mp = >350 °C;  $^1\text{H}$  NMR (400 MHz,  $\text{CDCl}_3$ )  $\delta$  7.93 (bd,  $J = 1.5$  Hz, 1H), 7.59 (bd,  $J = 1.5$  Hz, 1H), 7.54–7.49 (m, 2H), 7.48–7.42 (m, 5H), 7.39–7.35 (m, 3H), 7.34–7.29 (m, 7H), 7.28–7.22 (m, 8H);  $^{13}\text{C}\{^1\text{H}\}$  NMR (126 MHz,  $\text{CDCl}_3$ )  $\delta$  153.3, 152.0, 143.5, 141.7, 139.9, 139.0, 138.6, 137.3, 136.0, 135.6, 135.3, 131.9, 131.8, 131.0, 130.6, 130.0, 129.1, 128.9, 128.7, 128.7, 128.32, 128.28, 128.05, 127.99, 127.7, 127.3, 125.8, 118.5; IR (Neat)  $\nu_{\text{max}}$  1577, 1440, 1301, 1378, 1141, 1117, 1070, 1025, 911  $\text{cm}^{-1}$ ; **HRMS (ESI)** for  $\text{C}_{41}\text{H}_{28}\text{NO}_2\text{S}$  ( $\text{M}+\text{H}$ ) $^+$ : calcd. 598.1835, found 598.1843.

### Synthesis of 3,4-dipropyloquinoline-1(2H)-thione (**11**):<sup>4a</sup>

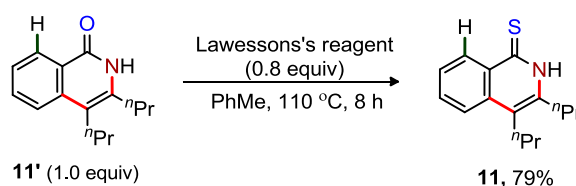

The oven dried sealed tube was charged with **11'** (0.5 g, 1.0 equiv) and Lawesson's reagent (0.8 equiv). The reaction tube was evacuated several times and purged with nitrogen followed by dry toluene (15 mL) was added and the resulting mixture was stirred at 110 °C for 8 h until complete consumption of **11'**. Progress of the reaction was monitored by TLC. The reaction mixture was then cooled to room temperature until the formation of light yellow solid precipitate. Yellow precipitate was filtered and washed three times with hexane/ethyl acetate (1:1, 3  $\times$  20 mL). The compound **11** was obtained 0.42 g in 79% yield as light yellow solid. The compound **11** was stored under inert conditions at  $-20$  °C.

### **3,4-dipropyloquinoline-1(2H)-thione (**11**):**

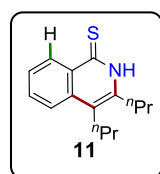

**11** (420 mg, 79%); light yellow crystalline solid.  $^1\text{H}$  NMR (400 MHz,  $\text{DMSO-d}_6$ )  $\delta$  13.07 (bs, 1H), 8.84 (dd,  $J = 8.0$  & 0.8 Hz, 1H), 7.84 (d,  $J = 8.0$  Hz, 1H), 7.82–7.74 (m, 1H), 7.58–7.50 (m, 1H), 2.72 (q,  $J = 7.6$  Hz, 4H), 1.66–1.45 (m, 4H), 1.09–0.96 (m, 6H);  $^{13}\text{C}\{^1\text{H}\}$  NMR (101 MHz,  $\text{DMSO-d}_6$ )  $\delta$  181.1, 141.4, 134.5, 133.4, 131.71, 131.70, 127.1, 124.1, 119.4, 31.8, 28.4, 23.8, 23.6, 14.5, 14.1; IR (Neat)  $\nu_{\text{max}}$  2952, 2862, 1620, 1572, 1468, 1249, 1232, 1151, 992  $\text{cm}^{-1}$ ; **HRMS (ESI)** for  $\text{C}_{15}\text{H}_{20}\text{NS}$  ( $\text{M}+\text{H}$ ) $^+$ : calcd. 246.1311, found 246.1311.

**Annulation of 3,4-dipropylisoquinoline-1(2H)-thione (11) with diphenylacetylene (2a, eq 1):**

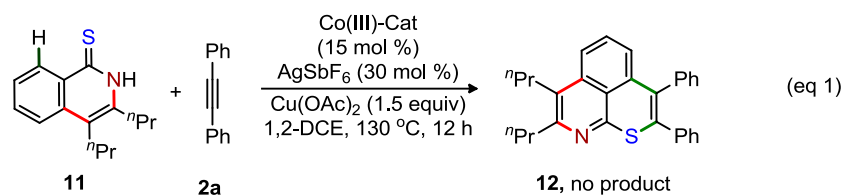

The oven dried 15 mL screw capped tube was charged with thioamide (**11**, 0.3 mmol), diphenylacetylene (**2a**, 0.6 mmol), Cp<sup>\*</sup>Co(CO)I<sub>2</sub> (15 mol %), and Cu(OAc)<sub>2</sub> (1.5 equiv). Subsequently, AgSbF<sub>6</sub> (30 mol %) was introduced in to the tube in glove box. Dry 1,2-dichloroethane (2.0 mL) was added to the tube under nitrogen atmosphere and the resulting mixture was stirred at 130 °C for 12 h. The product **12** was not obtained.

**Synthesis of 6-methyl-3,4-dipropyl-1H-isothiochromen-1-one (13, eq 2):**

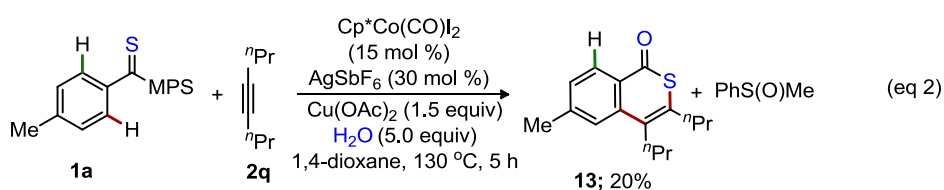

A mixture of *N*-[4-methylbenzothioyl]-*S*-methyl-*S*-phenylsulfoximine (**1a**, 0.3 mmol), 4-octyne (**2q**, 0.9 mmol), and Cp<sup>\*</sup>Co(CO)I<sub>2</sub> (21 mg, 15 mol%) was taken in a 15 mL screw capped tube. Subsequently, AgSbF<sub>6</sub> (31 mg, 30 mol%) was introduced in to the tube in a glove box. The solvent 1,4-dioxane (2.0 mL) and H<sub>2</sub>O (27 μL, 5.0 equiv) were added to the mixture and the resulting mixture was stirred at 130 °C in a heating block for 5 h. The reaction mixture was cooled to ambient temperature, filtered through a small plug of Celite, and then washed with dichloromethane (3 × 10 mL). The solvents were evaporated under reduced pressure and the crude material was purified by flash chromatography on silica gel (5–10% *n*-hexane/EtOAc eluent) to afford the product **13**. The compound **13** was obtained 16 mg in 20% yield as colour less solid.

**6-Methyl-3,4-dipropyl-1H-isothiochromen-1-one (13):**

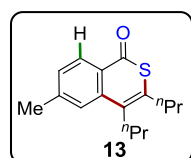

**13** (16 mg, 20%); colorless solid. mp = 106–107 °C; <sup>1</sup>H NMR (400 MHz, CDCl<sub>3</sub>) δ 8.26 (d, *J* = 8.0 Hz, 1H), 7.56 (s, 1H), 7.31 (d, *J* = 8.5 Hz, 1H), 2.79 (t, *J* = 8.0 Hz, 2H), 2.62 (t, *J* = 8.0 Hz, 2H), 2.50 (s, 3H), 1.73–1.65 (m, 2H), 1.64–1.58 (m, 2H), 1.08 (t, *J* = 7.25 Hz, 3H), 1.02 (t, *J* = 7.25 Hz, 3H); <sup>13</sup>C {<sup>1</sup>H} NMR (101 MHz,



CDCl<sub>3</sub>)  $\delta$  187.3, 144.3, 138.7, 136.8, 128.4, 126.9, 126.8, 126.3, 126.2, 36.6, 30.9, 23.6, 23.2, 22.3, 14.3, 13.9; IR (Neat)  $\nu_{\max}$  2954, 2925, 2861, 1714, 1621, 1603, 1574, 1545, 1472, 1456, 1377, 1329, 1278, 1261, 1228, 1211, 1139, 1087, 1035, 973, 887 cm<sup>-1</sup>; **HRMS (ESI)** for C<sub>16</sub>H<sub>21</sub>OS (M+H)<sup>+</sup>: calcd. 261.1308, found 261.1310.

### Reaction of 1a with 2q (eq 3):

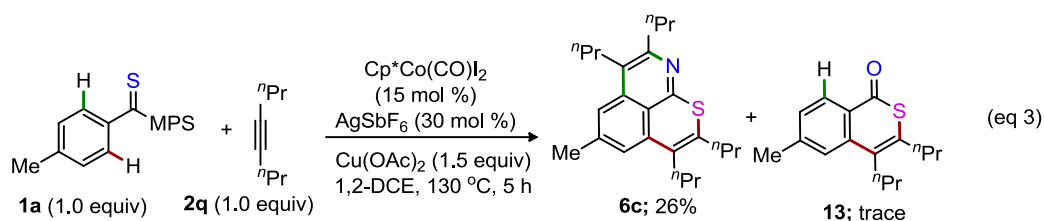

A mixture of *N*-[4-methylbenzothioyl]-*S*-methyl-*S*-phenylsulfoximine (**1a**, 0.3 mmol), 4-octyne (**2q**, 0.3 mmol), and Cp<sup>\*</sup>Co(CO)<sub>2</sub> (21 mg, 15 mol%) was taken in a 15 mL screw capped tube. Subsequently, AgSbF<sub>6</sub> (31 mg, 30 mol%) was introduced into the tube in a glove box. The solvent 1,2-DCE (2.0 mL) was added to the mixture and the resulting mixture was stirred at 130 °C in a heating block for 5 h. The reaction mixture was cooled to ambient temperature, filtered through a small plug of Celite, and then washed with dichloromethane (3 × 10 mL). The solvents were evaporated under reduced pressure and the crude material was purified by flash chromatography on silica gel (5–10% *n*-hexane/EtOAc eluent) to afford the product **6c** and **13**. The compound **6c** was obtained in 26% yield as yellow colour solid along with trace amount of product **13**.

### Reaction of 1a with 2a and 2q (eq 4):

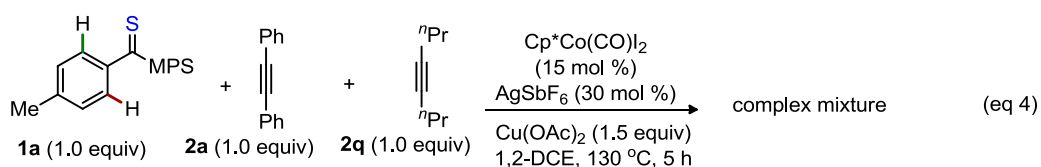

A mixture of *N*-[4-methylbenzothioyl]-*S*-methyl-*S*-phenylsulfoximine (**1a**, 0.3 mmol), 4-octyne (**2q**, 0.3 mmol), diphenylacetylene (**2a**, 0.3 mmol), and Cp<sup>\*</sup>Co(CO)<sub>2</sub> (21 mg, 15 mol%) was taken in a 15 mL screw capped tube. Subsequently, AgSbF<sub>6</sub> (31 mg, 30 mol%) was introduced in to the tube in a glove box. The solvent 1,2-DCE (2.0 mL) was added to the mixture and the resulting mixture was stirred at 130 °C in a heating block for 5 h. The reaction mixture was cooled to ambient temperature, filtered through a small plug of Celite, and then washed with dichloromethane (3 × 10 mL). The solvents were evaporated under

reduced pressure and the purification of the crude material proved highly difficult due to the formation of a mixture of products.

### Deuterium labelling experiment-1 (eq 5):

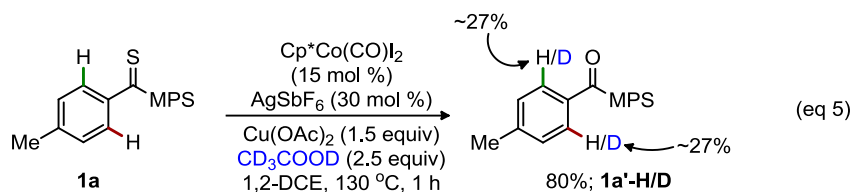

A mixture of *N*-[4-methylbenzothioyl]-*S*-methyl-*S*-phenylsulfoximine (**1a**, 0.3 mmol),  $\text{Cp}^*\text{Co}(\text{CO})\text{I}_2$  (21 mg, 15 mol%), and  $\text{Cu}(\text{OAc})_2$  (81 mg, 0.45 mmol) was taken in a 15 mL screw capped tube. Subsequently,  $\text{AgSbF}_6$  (31 mg, 30 mol %) was introduced in to the tube in a glove box. The solvent 1,2-dichloroethane (2.0 mL) and  $\text{CD}_3\text{COOD}$  (48  $\mu\text{L}$ , 2.5 equiv) were added to the mixture and the resulting mixture was stirred at 130 °C in a heating block for 1 h. The reaction mixture was cooled to ambient temperature, filtered through a small plug of Celite and then washed with dichloromethane ( $3 \times 10$  mL). The solvents were evaporated under reduced pressure to give the desired *o*-deuterium incorporated product **1a'-H/D** with 33% D-incorporation in both the *ortho*-H of **1a**.

### Deuterium labelling experiment-2 (eq 6):

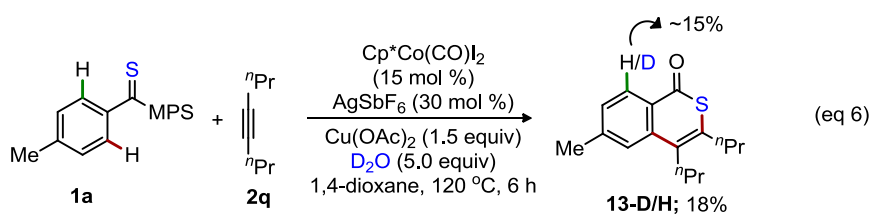

A mixture of *N*-[4-methylbenzothioyl]-*S*-methyl-*S*-phenylsulfoximine (**1a**, 0.3 mmol), 4-octyne (**2q**, 0.9 mmol), and  $\text{Cp}^*\text{Co}(\text{CO})\text{I}_2$  (21 mg, 15.0 mol%) was taken in a 15 mL screw capped tube. Subsequently,  $\text{AgSbF}_6$  (31 mg, 30 mol%) was introduced in to the tube in a glove box. The solvent 1,4-dioxane (2.0 mL) and  $\text{D}_2\text{O}$  (27  $\mu\text{L}$ , 5.0 equiv) were added to the mixture and the resulting mixture was stirred at 130 °C in a heating block for 6 h. The reaction mixture was cooled to ambient temperature, filtered through a small plug of Celite and then washed with dichloromethane ( $3 \times 10$  mL). The solvents were evaporated under reduced pressure and the crude material was purified using column chromatography on silica gel (5–10% *n*-hexane/EtOAc eluent) to give **13-D/H** (14 mg, 18%) with 15% deuterium incorporation in the *peri*-C–H bond of isothiochromenone.

## Competition experiments:

### Competition experiment between **1a** and **1k** with **2m** (eq 7):

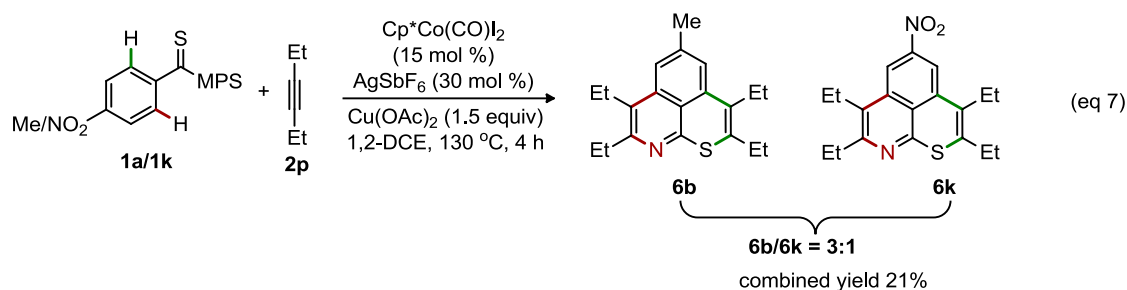

The competition experiment was carried out in a 15 mL screw capped tube. The tube was charged with **1a** (0.3 mmol), **1k** (0.3 mmol), 3-hexyne (**2p**, 0.9 mmol),  $\text{Cp}^*\text{Co}(\text{CO})\text{I}_2$  (21 mg, 10 mol %), and  $\text{Cu}(\text{OAc})_2$  (85 mg, 0.45 mmol). Subsequently,  $\text{AgSbF}_6$  (31 mg, 30 mol %) was introduced in to the tube in a glove box. The solvent 1,2-dichloroethane (2.0 mL) (2.0 mL) was added to the mixture and the resulting mixture was stirred at 130 °C in a heating block for 4 h. The reaction mixture was cooled to ambient temperature, filtered through a small plug of Celite and then washed with dichloromethane ( $3 \times 10$  mL). The solvents were evaporated under reduced pressure and the crude material was purified using column chromatography on neutral alumina (5–10% *n*-hexane/EtOAc eluent) to provide a mixture of the desired products **6b** and **6k** (42 mg) as red solid. Based on the  $^1\text{H}$  NMR spectrum, the respective compounds **6b** and **6k** (~3:1) were formed as inseparable mixture.

### Reaction in presence of TEMPO/BHT (eq 8)

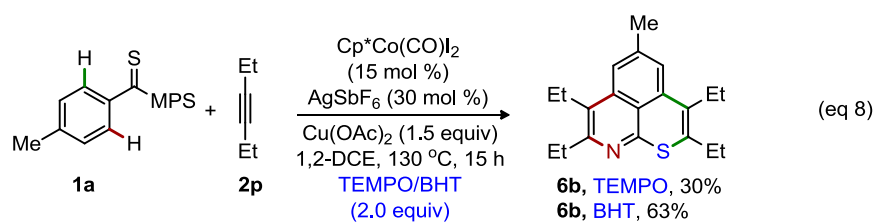

The annulation reactions were carried out in a 15 mL screw capped tube. The tube was independently charged with *N*-[4-methylbenzothioyl]-*S*-methyl-*S*-phenylsulfoximine (**1a**, 3.0 mmol), 3-hexyne (**2p**, 9.0 mmol),  $\text{Cp}^*\text{Co}(\text{CO})\text{I}_2$  (21 mg, 10 mol %), TEMPO/BHT (2.0 equiv), and  $\text{Cu}(\text{OAc})_2$  (85 mg, 0.45 mmol). Subsequently,  $\text{AgSbF}_6$  (31 mg, 30 mol %) was introduced in to the tube in a glove box. The solvent 1,2-dichloroethane (2.0 mL) was added to the mixture and the resulting mixture was stirred at 130 °C for 15 h. The reaction mixture was cooled to ambient temperature, filtered through a small plug of Celite and then washed with dichloromethane ( $3 \times 20$  mL). The solvents were evaporated under reduced pressure and

the crude material was purified using column chromatography on neutral alumina (5–10% *n*-hexane/EtOAc eluent). The desired product **6b** was isolated in 30% yield (when conducted in presence of TEMPO) and 63% yield (when conducted in presence of BHT).

### Photophysical Properties

UV-Vis and fluorescence Spectra of the represented thiopyrano-isoquinoline derivatives were recorded in dichloromethane solvent with a fixed concentration of  $10^{-5}$  M.

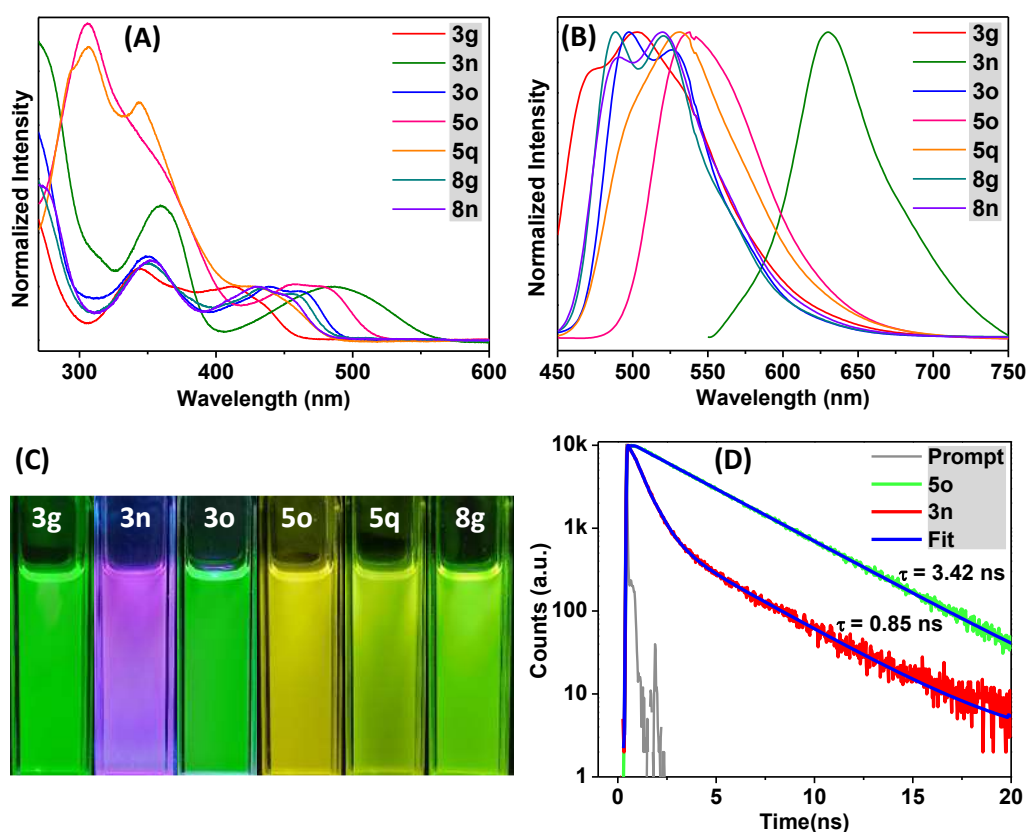

**Figure S3:** Normalized absorption (A) and fluorescence (B) spectra in DCM at RT; ( $10^{-5}$  M); Observer fluorescence under UV excitation (365 nm); (C); Life time measurements (D).

**Table S2: Absorption, Emission Maxima and Stokes Shifts**

| Compounds | $\lambda_{ab}(nm)$ | $\lambda_n(nm)$ | $\lambda_{ss}(nm)$ |
|-----------|--------------------|-----------------|--------------------|
| <b>3g</b> | 412/344            | 503             | 91                 |
| <b>3o</b> | 438/350            | 526             | 88                 |
| <b>3n</b> | 486/360            | 630             | 144                |

|           |         |     |     |
|-----------|---------|-----|-----|
| <b>8g</b> | 433/351 | 520 | 87  |
| <b>5p</b> | 457/360 | 538 | 81  |
| <b>5q</b> | 429/344 | 531 | 102 |
| <b>8n</b> | 431/354 | 520 | 89  |

**X-ray crystallography:** Single crystal X-ray data for the compound **3o**, **5f**, and **5h** were collected using the Bruker D8 Quest CMOS detector system [ $\lambda(\text{Mo-K}\alpha) = 0.71073 \text{ \AA}$ ] at 298K, graphite monochromator with a  $\omega$  scan width of  $0.3^\circ$ , crystal-detector distance 60 mm, collimator 0.5 mm. The SMART software<sup>5</sup> was used for the intensity data acquisition and the SAINTPLUS Software<sup>5</sup> was used for the data extraction. In each case, absorption correction was performed with the help of SADABS program,<sup>5</sup> an empirical absorption correction using equivalent reflections was performed with the program. The structure was solved using SHELXS-97,<sup>6</sup> and full-matrix least-squares refinement against  $F^2$  was carried out using SHELXL-97.<sup>6</sup> All non-hydrogen atoms were refined anisotropically. Aromatic and methyl hydrogens were introduced on calculated positions and included in the refinement riding on their respective parent atoms.

#### X-ray crystal structure and data for **3s**, **5h** and **5l**

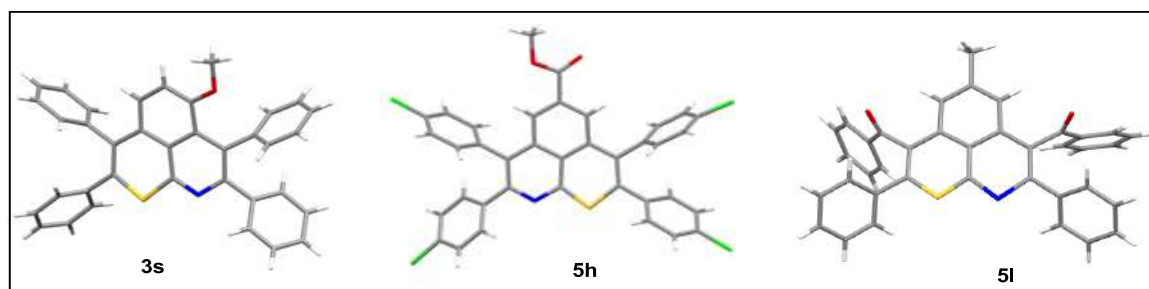

**Figure S4.** Thermal ellipsoidal plot of compound **3s**, **5h**, and **5l** with atom labeling scheme. Displacement ellipsoids are drawn at 50% probability level except for the H atoms, which are shown as circles of arbitrary radius.

**Table S3.** Crystal data for **3s**, **5h**, and **5l**

| Identification code        | <b>3s</b>                              | <b>5h</b>                                                  | <b>5l</b>                                                     |
|----------------------------|----------------------------------------|------------------------------------------------------------|---------------------------------------------------------------|
| Formula                    | $\text{C}_{36}\text{H}_{25}\text{NOS}$ | $\text{C}_{37}\text{H}_{21}\text{Cl}_4\text{NO}_2\text{S}$ | $\text{C}_{38}\text{H}_{25}\text{N}_{1.75}\text{O}_2\text{S}$ |
| $F_w$                      | 519.63                                 | 685.41                                                     | 570.16                                                        |
| $T$ (K)                    | 296                                    | 298                                                        | 306                                                           |
| $\lambda$ ( $\text{\AA}$ ) | 0.71073                                | 0.71073                                                    | 0.71073                                                       |

| Crystal system                              | monoclinic        | triclinic         | triclinic         |
|---------------------------------------------|-------------------|-------------------|-------------------|
| Space group                                 | <i>P 21/c</i>     | <i>P -1</i>       | <i>P -1</i>       |
| <i>a</i> (Å)                                | 13.5770(4)        | 9.0387(7)         | 9.3410(2)         |
| <i>b</i> (Å)                                | 9.7186(3)         | 12.2872(11)       | 11.8743(2)        |
| <i>c</i> (Å)                                | 21.3735(8)        | 15.4499(13)       | 14.2000(2)        |
| $\alpha$ (°)                                | 90                | 70.572(4)         | 103.803(1)        |
| $\beta$ (°)                                 | 102.957(1)        | 83.642(3)         | 92.000(2)         |
| $\gamma$ (°)                                | 90                | 86.486(4)         | 108.233(2)        |
| <i>V</i> (Å <sup>3</sup> )                  | 2748.41(16)       | 1607.7(2)         | 1442.47(5)        |
| <i>Z</i>                                    | 4                 | 2                 | 2                 |
| $\rho_{\text{calcd}}$ (Mg m <sup>-3</sup> ) | 1.256             | 1.416             | 1.313             |
| $\mu$ [mm <sup>-1</sup> ]                   | 0.148             | 0.469             | 0.150             |
| total reflns                                | 18167             | 67192             | 21430             |
| unique reflns                               | 6620              | 7393              | 6282              |
| observed reflns                             | 3931              | 5708              | 3836              |
| $R_1[I > 2\sigma(I)]$                       | 0.0674            | 0.0746            | 0.0855            |
| $wR_2$ [all]                                | 0.2153            | 0.2330            | 0.3122            |
| GOF                                         | 1.037             | 1.030             | 1.115             |
| Diffractometer                              | SMART APEX<br>CCD | SMART APEX<br>CCD | SMART APEX<br>CCD |
| CCDC Number                                 | 2045976           | 2045977           | 2045975           |

### DFT calculations:

DFT computations were carried out to validate the proposed mechanism. The Gaussian 09 software package was used<sup>7</sup> with its implemented M06 functional,<sup>8</sup> the 6-31G(d,p) basis set<sup>9</sup> for all main group elements, and the LANL2DZ (ECP) basis set<sup>10</sup> for Co. Single point calculations were conducted at the M06/6-311++G(d,p)-SDD(ECP)<sup>11</sup> level of theory. Solvation energies were obtained at the single point level using the SMD approach<sup>12</sup> for 1,2-dichloroethane. The discussed values are solvent-corrected Gibbs free energies at 393.15 K in kcal/mol ( $\Delta G_{393}$ ). The molecular system composed of substrate **A**, 2 equiv of 2-butyne, [Cp\*Co(OAc)]<sup>+</sup>, and an additional AcO<sup>-</sup> to ensure a second deprotonation of **A** with the same Co complex, was used as a reference for the free energies (Scheme 1).

Cp-cobalt(III) complexes can adopt different spin states, i.e. singlet (S), triplet (T) and quintet (Q). In agreement with our previous studies,<sup>13</sup> 16-electrons complexes are more stable in the triplet state. For instance, for complex **D** in Scheme 1, we found  $\Delta E_{S-T} = -3.8$  kcal/mol and  $\Delta E_{S-Q} = 20.0$  kcal/mol. On the other hand, 18-electron complexes are usually more stable in

singlet state, as it is the case for instance for complex **E**, for which we found  $\Delta E_{S-T} = 7.8$  kcal/mol and  $\Delta E_{S-Q} = 25.9$  kcal/mol. Since all major steps involve 18-electron complexes (16-electron species are only involved in dissociative ligand exchanges such as from **C** to **E**), we did not compute the minimum energy crossing points (MECP) of the singlet and triplet energy surfaces.

Coordination of **A** to  $[\text{Cp}^*\text{Co}(\text{OAc})]^+$  gives complex **B**, which is already pre-organized for a concerted metallation-deprotonation process (CMD), as shown by a hydrogen bond with the acetate ligand and a  $\eta^1$ -coordination between Co and the *ipso* carbon, at the expense of 5.9 kcal/mol (-12.1 kcal/mol without solvent effect). C-H metalation then occurs through **TS<sub>BC</sub>**, lying 12.8 kcal/mol above the reference system. The resulting metallacycle **C** is only 0.2 kcal/mol more stable than **B**. A stepwise ligand exchange between acetic acid and 2-butyne then takes place, leading to the alkyne complex **E**, which was also located at -0.2 kcal/mol on the free energy surface.

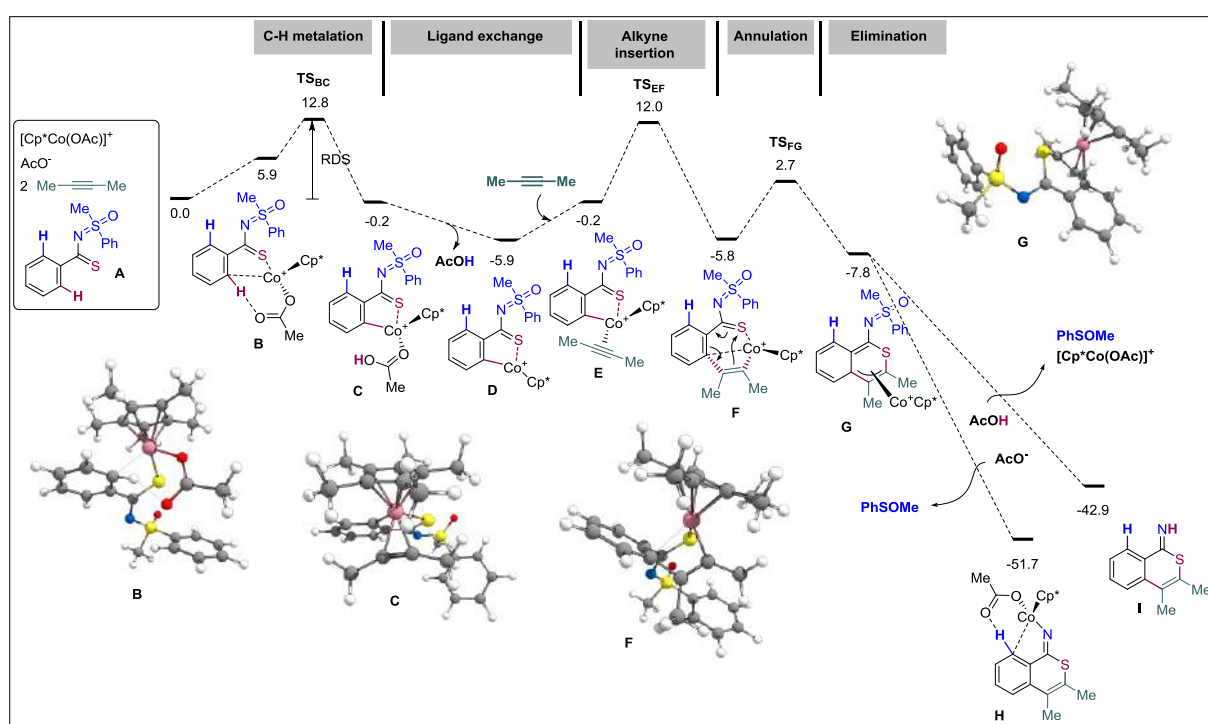

**Scheme 1. Free energy profile ( $\Delta G_{393}$ , kcal/mol), part 1 (first annulation).**

Alkyne insertion yields the seven-membered complex **F** in which the metal receives electron density from an aryl carbon. This intermediate is formed in an exergonic fashion (-5.8 kcal/mol) through **TS<sub>EF</sub>** lying at 12.0 kcal/mol. The annulation step can be described as a  $6\pi$ -electrocyclization to give the  $\pi$ -allyl intermediate **G** at -7.8 kcal/mol. The corresponding

transition state, **TS<sub>FG</sub>**, was found as low as 2.8 kcal/mol on the surface. Complex **G** might then react with  $\text{AcO}^-$  to give species **H** at -51.7 kcal/mol, which is ready for another CMD step, or with  $\text{AcOH}$  to give compound **I** at -42.9 kcal/mol.<sup>14</sup>

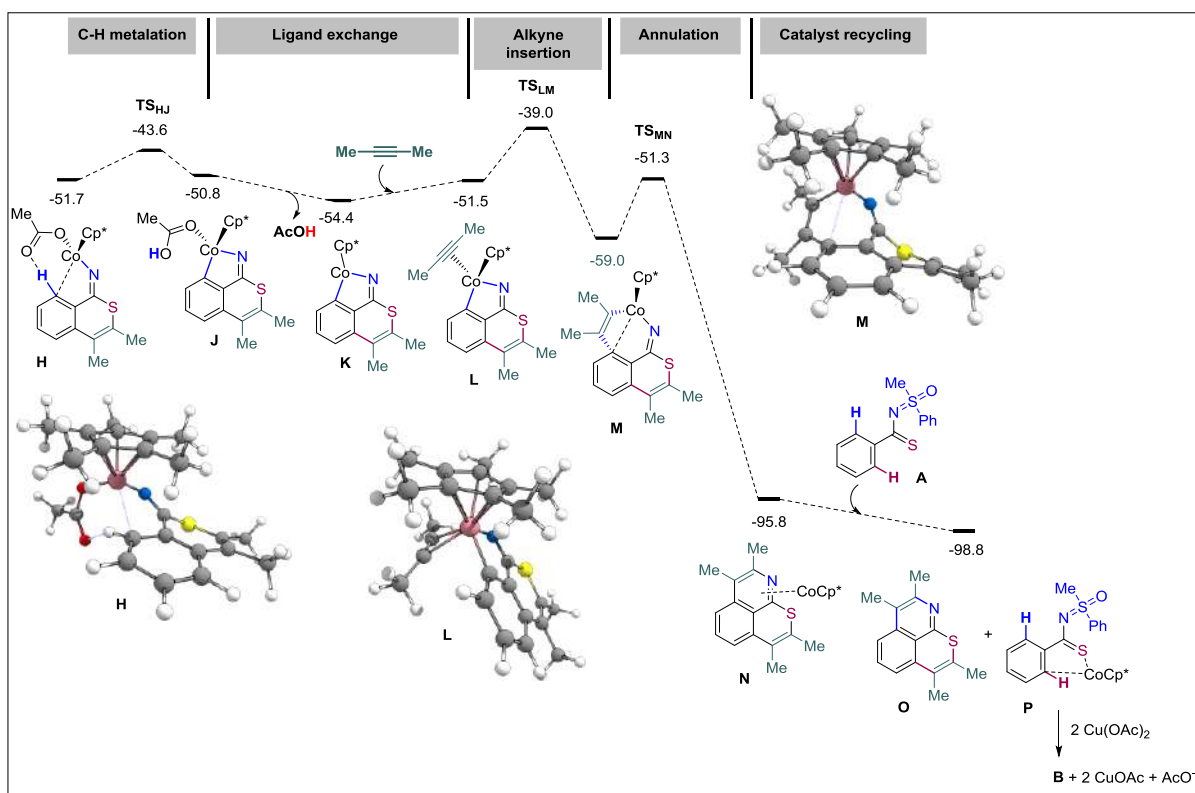

**Scheme 2. Free energy profile ( $\Delta G_{393}$ , kcal/mol), part 2 (second annulation)**

The second part of the mechanism is shown in Scheme 2. It starts in a similar fashion, the computed pathway between **H** and the alkyne complex **L** being rather flat. The insertion step requires 12.0 kcal/mol of free energy of activation and is exergonic by 7.5 kcal/mol to provide **M**. The reductive elimination step is achieved through **TS<sub>MN</sub>**, which was found at -51.3 kcal/mol. This irreversible step leads to the experimentally observed tricyclic product with a release of 36.8 kcal/mol. Liberation of the final product **O** by ligand exchange with **A** further lowers the free energy by 3.0 kcal/mol (-98.8 kcal/mol for the reference system in Scheme 1). It is then likely that complex **P** transforms into **B** for a new turn-over by  $\text{Cu}(\text{OAc})_2$  mediated oxidation.<sup>15</sup>



## Density Functional Theory (DFT) Calculations:

**Table S4.** Coordinates (x,y,z), energies (Hartree) and imaginary frequencies (cm<sup>-1</sup>) of the computed species.

| 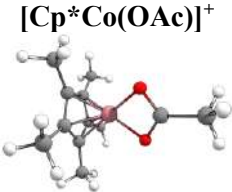 <p><b>[Cp*Co(OAc)]<sup>+</sup></b></p> <p>Thermal correction to Gibbs Free Energy=<br/>0.203311<br/>E(RM06) = -763.966307256<br/>E(SCRF) = -764.046700803</p> |           |           |           |  <p><b>AcO<sup>-</sup></b></p> <p>Thermal correction to Gibbs Free Energy=<br/>0.012493<br/>E(RM06) = -228.468666314<br/>E(SCRF) = -228.557009978</p> |           |           |           |
|-------------------------------------------------------------------------------------------------------------------------------------------------------------------------------------------------------------------------------------------------|-----------|-----------|-----------|------------------------------------------------------------------------------------------------------------------------------------------------------------------------------------------------------------------------------------------|-----------|-----------|-----------|
| Co                                                                                                                                                                                                                                              | -0.295866 | 0.000415  | -0.203279 | O                                                                                                                                                                                                                                        | 0.81005   | 1.099263  | -0.000018 |
| O                                                                                                                                                                                                                                               | -1.859548 | -1.070374 | -0.280903 | C                                                                                                                                                                                                                                        | 0.219497  | -0.00208  | 0.000075  |
| C                                                                                                                                                                                                                                               | -2.543994 | 0.009533  | -0.371343 | O                                                                                                                                                                                                                                        | 0.682323  | -1.164733 | -0.000015 |
| O                                                                                                                                                                                                                                               | -1.854738 | 1.084007  | -0.286552 | C                                                                                                                                                                                                                                        | -1.343042 | 0.062187  | 0.000025  |
| C                                                                                                                                                                                                                                               | -4.00702  | 0.004082  | -0.558784 | H                                                                                                                                                                                                                                        | -1.738991 | -0.464279 | -0.881793 |
| H                                                                                                                                                                                                                                               | -4.475497 | -0.500854 | 0.292674  | H                                                                                                                                                                                                                                        | -1.739344 | -0.46759  | 0.879686  |
| H                                                                                                                                                                                                                                               | -4.25748  | -0.58066  | -1.449608 | H                                                                                                                                                                                                                                        | -1.719382 | 1.094985  | 0.001772  |
| H                                                                                                                                                                                                                                               | -4.390496 | 1.021142  | -0.649616 |                                                                                                                                                                                                                                          |           |           |           |
| C                                                                                                                                                                                                                                               | 1.553671  | -0.737411 | -0.674358 |                                                                                                                                                                                                                                          |           |           |           |
| C                                                                                                                                                                                                                                               | 1.557066  | 0.723676  | -0.680675 |                                                                                                                                                                                                                                          |           |           |           |
| C                                                                                                                                                                                                                                               | 1.171993  | 1.176262  | 0.599624  |                                                                                                                                                                                                                                          |           |           |           |
| C                                                                                                                                                                                                                                               | 0.872139  | 0.003796  | 1.392266  |                                                                                                                                                                                                                                          |           |           |           |
| C                                                                                                                                                                                                                                               | 1.164657  | -1.177272 | 0.609176  |                                                                                                                                                                                                                                          |           |           |           |
| C                                                                                                                                                                                                                                               | 0.932624  | 2.573171  | 1.039587  |                                                                                                                                                                                                                                          |           |           |           |
| H                                                                                                                                                                                                                                               | 1.624664  | 2.84345   | 1.84619   |                                                                                                                                                                                                                                          |           |           |           |
| H                                                                                                                                                                                                                                               | 1.0688    | 3.287486  | 0.224794  |                                                                                                                                                                                                                                          |           |           |           |
| H                                                                                                                                                                                                                                               | -0.087442 | 2.695413  | 1.422347  |                                                                                                                                                                                                                                          |           |           |           |
| C                                                                                                                                                                                                                                               | 0.333353  | 0.011254  | 2.768893  |                                                                                                                                                                                                                                          |           |           |           |
| H                                                                                                                                                                                                                                               | 1.1639    | 0.00846   | 3.48924   |                                                                                                                                                                                                                                          |           |           |           |
| H                                                                                                                                                                                                                                               | -0.265777 | 0.905403  | 2.966242  |                                                                                                                                                                                                                                          |           |           |           |
| H                                                                                                                                                                                                                                               | -0.276499 | -0.874348 | 2.971993  |                                                                                                                                                                                                                                          |           |           |           |
| C                                                                                                                                                                                                                                               | 0.91649   | -2.569032 | 1.060349  |                                                                                                                                                                                                                                          |           |           |           |
| H                                                                                                                                                                                                                                               | 1.049234  | -3.290571 | 0.251369  |                                                                                                                                                                                                                                          |           |           |           |
| H                                                                                                                                                                                                                                               | 1.605259  | -2.837065 | 1.87046   |                                                                                                                                                                                                                                          |           |           |           |
| H                                                                                                                                                                                                                                               | -0.105134 | -2.682054 | 1.441714  |                                                                                                                                                                                                                                          |           |           |           |
| C                                                                                                                                                                                                                                               | 1.819757  | -1.568358 | -1.872086 |                                                                                                                                                                                                                                          |           |           |           |
| H                                                                                                                                                                                                                                               | 1.562151  | -2.617629 | -1.712294 |                                                                                                                                                                                                                                          |           |           |           |
| H                                                                                                                                                                                                                                               | 1.256599  | -1.207897 | -2.741214 |                                                                                                                                                                                                                                          |           |           |           |
| H                                                                                                                                                                                                                                               | 2.883375  | -1.51501  | -2.139042 |                                                                                                                                                                                                                                          |           |           |           |
| C                                                                                                                                                                                                                                               | 1.83006   | 1.544051  | -1.88391  |                                                                                                                                                                                                                                          |           |           |           |
| H                                                                                                                                                                                                                                               | 1.319501  | 1.141238  | -2.76616  |                                                                                                                                                                                                                                          |           |           |           |
| H                                                                                                                                                                                                                                               | 1.517809  | 2.582883  | -1.755202 |                                                                                                                                                                                                                                          |           |           |           |

|                                                                                                                                                                                                                      |           |           |           |                                                                                                                                                                                                                |           |           |           |
|----------------------------------------------------------------------------------------------------------------------------------------------------------------------------------------------------------------------|-----------|-----------|-----------|----------------------------------------------------------------------------------------------------------------------------------------------------------------------------------------------------------------|-----------|-----------|-----------|
| H                                                                                                                                                                                                                    | 2.904942  | 1.53783   | -2.108159 |                                                                                                                                                                                                                |           |           |           |
| <b>2-butyne</b><br>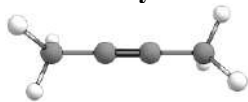<br>Thermal correction to Gibbs Free Energy=<br>0.045795<br>E(RM06) = -155.890566811<br>E(SCRF) = -155.897968660 |           |           |           | <b>A</b><br><br>Thermal correction to Gibbs Free Energy=<br>0.170973<br>E(RM06) = -1467.24063733<br>E(SCRF) = -1467.26886336 |           |           |           |
| C                                                                                                                                                                                                                    | -0.604134 | 0.000216  | 0.000107  | C                                                                                                                                                                                                              | 4.33057   | -0.594409 | -1.187891 |
| C                                                                                                                                                                                                                    | 0.603933  | 0.000764  | -0.001137 | C                                                                                                                                                                                                              | 3.01645   | -0.761669 | -0.772949 |
| C                                                                                                                                                                                                                    | 2.058312  | -0.000294 | 0.000358  | C                                                                                                                                                                                                              | 5.081312  | 0.476807  | -0.714544 |
| H                                                                                                                                                                                                                    | 2.462601  | 0.601976  | -0.823881 | C                                                                                                                                                                                                              | 4.51009   | 1.377178  | 0.180812  |
| H                                                                                                                                                                                                                    | 2.459783  | 0.412485  | 0.935107  | C                                                                                                                                                                                                              | 3.199207  | 1.207892  | 0.600134  |
| H                                                                                                                                                                                                                    | 2.459779  | -1.01643  | -0.108832 | C                                                                                                                                                                                                              | 2.430889  | 0.137405  | 0.12847   |
| C                                                                                                                                                                                                                    | -2.058168 | -0.000198 | 0.000254  | C                                                                                                                                                                                                              | 1.022482  | -0.040491 | 0.568941  |
| H                                                                                                                                                                                                                    | -2.460639 | -0.359948 | 0.956278  | S                                                                                                                                                                                                              | 0.320436  | 0.922924  | 1.739564  |
| H                                                                                                                                                                                                                    | -2.460605 | 1.007546  | -0.166832 | N                                                                                                                                                                                                              | 0.399058  | -1.055634 | -0.103485 |
| H                                                                                                                                                                                                                    | -2.460576 | -0.648556 | -0.78933  | S                                                                                                                                                                                                              | -1.116146 | -1.384412 | 0.237098  |
|                                                                                                                                                                                                                      |           |           |           | O                                                                                                                                                                                                              | -1.544768 | -1.957378 | 1.514749  |
|                                                                                                                                                                                                                      |           |           |           | C                                                                                                                                                                                                              | -1.45319  | -2.575944 | -1.042453 |
|                                                                                                                                                                                                                      |           |           |           | C                                                                                                                                                                                                              | -2.198091 | -0.026564 | -0.205645 |
|                                                                                                                                                                                                                      |           |           |           | C                                                                                                                                                                                                              | -3.332633 | 0.180552  | 0.567264  |
|                                                                                                                                                                                                                      |           |           |           | C                                                                                                                                                                                                              | -4.209448 | 1.195066  | 0.199955  |
|                                                                                                                                                                                                                      |           |           |           | C                                                                                                                                                                                                              | -3.941629 | 1.978426  | -0.918387 |
|                                                                                                                                                                                                                      |           |           |           | C                                                                                                                                                                                                              | -2.795262 | 1.757876  | -1.67827  |
|                                                                                                                                                                                                                      |           |           |           | C                                                                                                                                                                                                              | -1.909989 | 0.74796   | -1.324743 |
|                                                                                                                                                                                                                      |           |           |           | H                                                                                                                                                                                                              | 6.111492  | 0.609393  | -1.041571 |
|                                                                                                                                                                                                                      |           |           |           | H                                                                                                                                                                                                              | 5.091531  | 2.217923  | 0.555159  |
|                                                                                                                                                                                                                      |           |           |           | H                                                                                                                                                                                                              | -2.502278 | -2.871819 | -0.946609 |
|                                                                                                                                                                                                                      |           |           |           | H                                                                                                                                                                                                              | -1.250885 | -2.137675 | -2.023245 |
|                                                                                                                                                                                                                      |           |           |           | H                                                                                                                                                                                                              | -0.792492 | -3.428578 | -0.859593 |
|                                                                                                                                                                                                                      |           |           |           | H                                                                                                                                                                                                              | -3.501038 | -0.433441 | 1.449275  |
|                                                                                                                                                                                                                      |           |           |           | H                                                                                                                                                                                                              | -5.100411 | 1.380794  | 0.796085  |
|                                                                                                                                                                                                                      |           |           |           | H                                                                                                                                                                                                              | -4.628923 | 2.774467  | -1.198305 |
|                                                                                                                                                                                                                      |           |           |           | H                                                                                                                                                                                                              | -2.583744 | 2.381513  | -2.544303 |
|                                                                                                                                                                                                                      |           |           |           | H                                                                                                                                                                                                              | -0.994595 | 0.579198  | -1.891103 |
|                                                                                                                                                                                                                      |           |           |           | H                                                                                                                                                                                                              | 2.426877  | -1.598718 | -1.137415 |
|                                                                                                                                                                                                                      |           |           |           | H                                                                                                                                                                                                              | 4.771     | -1.305621 | -1.884903 |
|                                                                                                                                                                                                                      |           |           |           | H                                                                                                                                                                                                              | 2.745011  | 1.904307  | 1.302185  |
| <b>B</b>                                                                                                                                                                                                             |           |           |           | <b>TS<sub>BC</sub></b>                                                                                                                                                                                         |           |           |           |

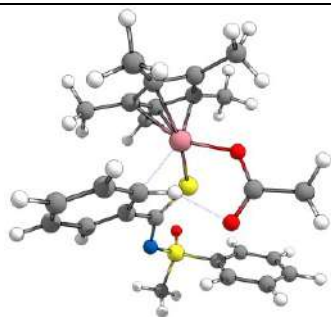

Thermal correction to Gibbs Free Energy=  
0.415026

E(RM06) = -2231.26691649

E(SCRF) = -2231.34690154

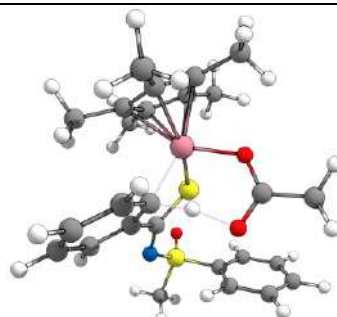

Thermal correction to Gibbs Free Energy=  
0.414080

E(RM06) = -2231.25736895

E(SCRF) = -2231.33497869

Frequency -795.5507

|    |           |           |           |    |           |           |           |
|----|-----------|-----------|-----------|----|-----------|-----------|-----------|
| H  | -0.807361 | 0.134419  | -1.620748 | H  | -0.502465 | -0.117329 | -1.616229 |
| C  | -1.10907  | 1.190213  | -1.411965 | O  | 0.251447  | -1.17158  | -2.170008 |
| C  | -2.065672 | 1.779765  | -2.238711 | C  | -0.992653 | 0.974524  | -1.345484 |
| C  | -2.155311 | 3.165026  | -2.330961 | C  | -1.860139 | 1.465096  | -2.330192 |
| C  | -1.269804 | 3.968422  | -1.612383 | C  | -0.081923 | 1.882661  | -0.75733  |
| C  | -0.279771 | 3.395123  | -0.821698 | Co | -1.591515 | -0.426974 | 0.155206  |
| H  | -1.338228 | 5.050578  | -1.687606 | C  | -1.872763 | 2.813257  | -2.67134  |
| C  | -0.198395 | 2.006067  | -0.714603 | H  | -2.509283 | 0.767949  | -2.858127 |
| H  | -2.898445 | 3.622384  | -2.97929  | C  | -0.993788 | 3.697925  | -2.044085 |
| H  | -2.714008 | 1.14804   | -2.841653 | H  | -2.552839 | 3.179466  | -3.436918 |
| Co | -1.591072 | -0.496388 | 0.103476  | C  | -0.078939 | 3.233882  | -1.104834 |
| C  | 0.859457  | 1.371371  | 0.090252  | H  | -1.004354 | 4.751694  | -2.31095  |
| O  | -0.928016 | -2.073978 | -0.749082 | H  | 0.637081  | 3.908174  | -0.641381 |
| C  | -2.382833 | -0.01058  | 1.987378  | C  | 0.917026  | 1.320221  | 0.162097  |
| C  | -3.689943 | -0.371406 | 0.103639  | O  | -1.013636 | -2.114955 | -0.595213 |
| C  | 0.000302  | -2.114762 | -1.661656 | C  | -3.674843 | -0.272144 | 0.061696  |
| O  | 0.467596  | -1.14108  | -2.248059 | C  | -2.472751 | -1.129915 | 1.838588  |
| C  | 0.500491  | -3.512094 | -1.934833 | S  | 0.508366  | -0.11872  | 0.977747  |
| H  | -0.315831 | -4.239019 | -1.916558 | N  | 2.081955  | 1.971731  | 0.21566   |
| H  | 1.206864  | -3.787255 | -1.142735 | C  | -0.183553 | -2.174567 | -1.565401 |
| H  | 1.018548  | -3.544615 | -2.895526 | C  | -2.431465 | 0.310604  | 1.93109   |
| C  | -2.385621 | -1.425779 | 1.68363   | C  | -3.141913 | 0.836696  | 0.822915  |
| C  | -3.294588 | -1.639243 | 0.584272  | C  | -1.790087 | 1.116102  | 3.002755  |
| C  | -1.685403 | -2.505859 | 2.42265   | C  | -3.328695 | -1.470519 | 0.739146  |
| C  | -3.134032 | 0.641714  | 0.983734  | C  | -4.544195 | -0.187834 | -1.14312  |
| C  | -1.714107 | 0.649601  | 3.137549  | C  | 0.291192  | -3.54603  | -1.949298 |
| C  | -3.423079 | 2.098102  | 0.932944  | H  | -0.51385  | -4.278136 | -1.850583 |
| C  | -4.609547 | -0.136496 | -1.041423 | H  | 1.092662  | -3.839649 | -1.262168 |
| C  | -3.620443 | -2.957489 | -0.005592 | H  | 0.685318  | -3.541225 | -2.967276 |
| H  | -4.386238 | 2.300319  | 1.419604  | C  | -1.845001 | -2.108585 | 2.765055  |
| H  | -2.661479 | 2.680672  | 1.459889  | C  | -3.678561 | -2.850569 | 0.32912   |
| H  | -3.484265 | 2.475799  | -0.091851 | H  | -1.482294 | -2.984507 | 2.216157  |
| H  | -5.635343 | -0.411286 | -0.764138 | H  | -0.995219 | -1.673258 | 3.299689  |
| H  | -4.622012 | 0.913317  | -1.3455   | H  | -2.56671  | -2.45959  | 3.513973  |
| H  | -4.334144 | -0.743358 | -1.911488 | C  | -3.407039 | 2.277476  | 0.576598  |

|                                                                                                              |           |           |           |                                                                                                              |           |           |           |
|--------------------------------------------------------------------------------------------------------------|-----------|-----------|-----------|--------------------------------------------------------------------------------------------------------------|-----------|-----------|-----------|
| H                                                                                                            | -3.981215 | -3.644698 | 0.768541  | H                                                                                                            | -1.05507  | 0.540445  | 3.571376  |
| H                                                                                                            | -4.389437 | -2.876664 | -0.778377 | H                                                                                                            | -1.281604 | 1.999174  | 2.60018   |
| H                                                                                                            | -2.716884 | -3.392717 | -0.452401 | H                                                                                                            | -2.556454 | 1.468172  | 3.705547  |
| H                                                                                                            | -1.306908 | -3.258938 | 1.723729  | H                                                                                                            | -4.376621 | 2.55005   | 1.013512  |
| H                                                                                                            | -0.836958 | -2.121831 | 2.996981  | H                                                                                                            | -2.650113 | 2.916859  | 1.04038   |
| H                                                                                                            | -2.367401 | -3.004448 | 3.123604  | H                                                                                                            | -3.44377  | 2.518025  | -0.489566 |
| H                                                                                                            | -0.920379 | 0.032181  | 3.565953  | H                                                                                                            | -5.584742 | -0.422875 | -0.885692 |
| H                                                                                                            | -1.270968 | 1.609377  | 2.852209  | H                                                                                                            | -4.531683 | 0.813244  | -1.582666 |
| H                                                                                                            | -2.452564 | 0.843364  | 3.926333  | H                                                                                                            | -4.228091 | -0.900492 | -1.914153 |
| S                                                                                                            | 0.512998  | -0.103866 | 0.862058  | H                                                                                                            | -4.182976 | -3.371904 | 1.15164   |
| H                                                                                                            | 0.433159  | 4.013347  | -0.282439 | H                                                                                                            | -4.343146 | -2.859678 | -0.538811 |
| N                                                                                                            | 2.019251  | 2.030253  | 0.109441  | H                                                                                                            | -2.772612 | -3.413131 | 0.074872  |
| S                                                                                                            | 3.290711  | 1.396701  | 0.880957  | S                                                                                                            | 3.336763  | 1.297266  | 0.969973  |
| O                                                                                                            | 3.263394  | 1.249019  | 2.334594  | O                                                                                                            | 3.321598  | 1.072781  | 2.41365   |
| H                                                                                                            | 4.603974  | 2.589049  | -0.686203 | C                                                                                                            | 4.615931  | 2.449417  | 0.546788  |
| C                                                                                                            | 4.548264  | 2.550794  | 0.404155  | C                                                                                                            | 3.733923  | -0.207269 | 0.104412  |
| H                                                                                                            | 4.264757  | 3.522993  | 0.815411  | H                                                                                                            | 4.675706  | 2.537032  | -0.540365 |
| H                                                                                                            | 5.487265  | 2.200702  | 0.840521  | H                                                                                                            | 4.347155  | 3.406387  | 1.001618  |
| C                                                                                                            | 3.736132  | -0.138909 | 0.102692  | H                                                                                                            | 5.547793  | 2.065842  | 0.969946  |
| C                                                                                                            | 4.382636  | -1.07849  | 0.901922  | C                                                                                                            | 4.353892  | -1.213774 | 0.838493  |
| H                                                                                                            | 4.566951  | -0.869123 | 1.952928  | C                                                                                                            | 3.404512  | -0.3507   | -1.241975 |
| C                                                                                                            | 4.75697   | -2.284703 | 0.322949  | H                                                                                                            | 4.56383   | -1.070174 | 1.895733  |
| H                                                                                                            | 5.264763  | -3.035034 | 0.922502  | C                                                                                                            | 4.665662  | -2.402743 | 0.189362  |
| C                                                                                                            | 4.472015  | -2.53321  | -1.017992 | H                                                                                                            | 5.153329  | -3.204021 | 0.737507  |
| H                                                                                                            | 4.762697  | -3.482133 | -1.461742 | C                                                                                                            | 4.341489  | -2.569146 | -1.154964 |
| H                                                                                                            | 3.565499  | -1.79072  | -2.831906 | H                                                                                                            | 4.580604  | -3.505444 | -1.653209 |
| C                                                                                                            | 3.810821  | -1.583854 | -1.794019 | C                                                                                                            | 3.708404  | -1.552337 | -1.867389 |
| C                                                                                                            | 3.436952  | -0.367315 | -1.238151 | H                                                                                                            | 3.435006  | -1.695498 | -2.909228 |
| H                                                                                                            | 2.888104  | 0.362902  | -1.828545 | H                                                                                                            | 2.892948  | 0.443513  | -1.782159 |
| <b>C</b><br>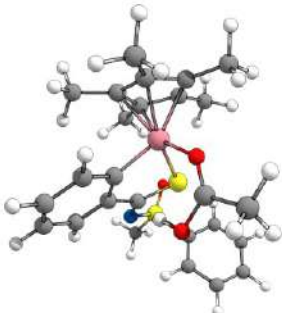              |           |           |           | <b>AcOH</b><br>         |           |           |           |
| Thermal correction to Gibbs Free Energy=<br>0.416985<br>E(RM06) = -2231.28366811<br>E(SCRF) = -2231.35863210 |           |           |           | Thermal correction to Gibbs Free Energy=<br>0.024845<br>E(RM06) = -229.030900998<br>E(SCRF) = -229.039875448 |           |           |           |
| H                                                                                                            | -0.565228 | -0.284651 | -2.308226 | H                                                                                                            | -1.706952 | -0.812585 | -0.000036 |
| O                                                                                                            | -0.704031 | -1.038953 | -2.920656 | O                                                                                                            | -0.762292 | -1.047155 | -0.000002 |
| C                                                                                                            | -1.35934  | 1.141645  | -0.977051 | C                                                                                                            | -0.0925   | 0.125019  | 0.000022  |
| C                                                                                                            | -2.339091 | 1.686161  | -1.80843  | O                                                                                                            | -0.653138 | 1.192221  | 0         |
| C                                                                                                            | -0.109867 | 1.796737  | -0.916617 | C                                                                                                            | 1.38729   | -0.099363 | 0.000019  |
| Co                                                                                                           | -1.643737 | -0.351294 | 0.201134  | H                                                                                                            | 1.904989  | 0.861789  | 0.000338  |

|   |           |           |           |   |          |           |           |
|---|-----------|-----------|-----------|---|----------|-----------|-----------|
| C | -2.111306 | 2.877278  | -2.495243 | H | 1.678354 | -0.682237 | 0.881165  |
| H | -3.303193 | 1.185088  | -1.911313 | H | 1.678316 | -0.681441 | -0.881701 |
| C | -0.898861 | 3.558012  | -2.357561 |   |          |           |           |
| H | -2.887417 | 3.287144  | -3.138455 |   |          |           |           |
| C | 0.107884  | 3.017266  | -1.575036 |   |          |           |           |
| H | -0.739157 | 4.496881  | -2.880899 |   |          |           |           |
| H | 1.073653  | 3.508832  | -1.479627 |   |          |           |           |
| C | 0.953214  | 1.096781  | -0.20477  |   |          |           |           |
| O | -2.033676 | -1.701622 | -1.240247 |   |          |           |           |
| C | -3.573255 | -0.360057 | 0.926219  |   |          |           |           |
| C | -1.771589 | -0.995705 | 2.236328  |   |          |           |           |
| S | 0.614582  | -0.530101 | 0.237981  |   |          |           |           |
| N | 2.101562  | 1.75222   | 0.001208  |   |          |           |           |
| C | -1.560172 | -1.863691 | -2.366628 |   |          |           |           |
| C | -1.750426 | 0.448139  | 2.067259  |   |          |           |           |
| C | -2.933258 | 0.833175  | 1.357011  |   |          |           |           |
| C | -0.801399 | 1.394855  | 2.712924  |   |          |           |           |
| C | -2.87318  | -1.487606 | 1.520054  |   |          |           |           |
| C | -4.807483 | -0.480322 | 0.105869  |   |          |           |           |
| C | -1.917427 | -3.027843 | -3.221583 |   |          |           |           |
| H | -2.638557 | -3.666305 | -2.711276 |   |          |           |           |
| H | -1.013205 | -3.597782 | -3.457052 |   |          |           |           |
| H | -2.328873 | -2.674459 | -4.171939 |   |          |           |           |
| C | -0.779317 | -1.781605 | 3.017613  |   |          |           |           |
| C | -3.277359 | -2.904819 | 1.333578  |   |          |           |           |
| H | -0.661196 | -2.796571 | 2.625025  |   |          |           |           |
| H | 0.207197  | -1.305704 | 3.015645  |   |          |           |           |
| H | -1.102086 | -1.863983 | 4.063231  |   |          |           |           |
| C | -3.377707 | 2.236886  | 1.151857  |   |          |           |           |
| H | 0.189699  | 0.955523  | 2.865418  |   |          |           |           |
| H | -0.676479 | 2.302337  | 2.110955  |   |          |           |           |
| H | -1.184118 | 1.705548  | 3.694272  |   |          |           |           |
| H | -3.785413 | 2.625478  | 2.094125  |   |          |           |           |
| H | -2.550746 | 2.891536  | 0.854673  |   |          |           |           |
| H | -4.160565 | 2.321163  | 0.393251  |   |          |           |           |
| H | -5.659535 | -0.791725 | 0.723911  |   |          |           |           |
| H | -5.076885 | 0.468255  | -0.36886  |   |          |           |           |
| H | -4.685526 | -1.231562 | -0.682923 |   |          |           |           |
| H | -4.242529 | -3.094838 | 1.820132  |   |          |           |           |
| H | -3.392686 | -3.14015  | 0.269544  |   |          |           |           |
| H | -2.547525 | -3.599456 | 1.758384  |   |          |           |           |
| S | 3.24267   | 1.080347  | 0.917731  |   |          |           |           |
| O | 2.941371  | 0.738653  | 2.308474  |   |          |           |           |
| C | 4.478144  | 2.349165  | 0.856873  |   |          |           |           |
| C | 3.974491  | -0.308422 | 0.082083  |   |          |           |           |
| H | 4.744198  | 2.544953  | -0.184284 |   |          |           |           |
| H | 4.041971  | 3.238531  | 1.318903  |   |          |           |           |
| H | 5.338517  | 1.993275  | 1.429019  |   |          |           |           |

|                                                                                   |           |           |           |                                                                                    |           |           |           |
|-----------------------------------------------------------------------------------|-----------|-----------|-----------|------------------------------------------------------------------------------------|-----------|-----------|-----------|
| C                                                                                 | 4.379735  | -1.387146 | 0.860418  |                                                                                    |           |           |           |
| C                                                                                 | 4.140033  | -0.273227 | -1.301008 |                                                                                    |           |           |           |
| H                                                                                 | 4.209039  | -1.376304 | 1.934009  |                                                                                    |           |           |           |
| C                                                                                 | 4.98251   | -2.466385 | 0.22405   |                                                                                    |           |           |           |
| H                                                                                 | 5.307299  | -3.322949 | 0.808093  |                                                                                    |           |           |           |
| C                                                                                 | 5.164294  | -2.449919 | -1.155762 |                                                                                    |           |           |           |
| H                                                                                 | 5.63761   | -3.296605 | -1.646112 |                                                                                    |           |           |           |
| C                                                                                 | 4.744094  | -1.360631 | -1.917529 |                                                                                    |           |           |           |
| H                                                                                 | 4.884368  | -1.360785 | -2.994794 |                                                                                    |           |           |           |
| H                                                                                 | 3.791806  | 0.577791  | -1.883383 |                                                                                    |           |           |           |
| <b>D</b>                                                                          |           |           |           | <b>E</b>                                                                           |           |           |           |
| 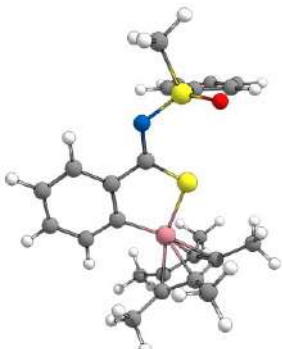 |           |           |           |  |           |           |           |
| Thermal correction to Gibbs Free Energy=<br>0.356758                              |           |           |           | Thermal correction to Gibbs Free Energy=<br>0.440386                               |           |           |           |
| E(RM06) = -2002.21201071                                                          |           |           |           | E(RM06) = -2158.14132509                                                           |           |           |           |
| E(SCRF) = -2002.29234377                                                          |           |           |           | E(RM06) = -2158.21912771                                                           |           |           |           |
| C                                                                                 | -0.822254 | 4.26672   | -0.943591 | C                                                                                  | 0.706791  | 4.205708  | 1.205508  |
| C                                                                                 | 0.149408  | 3.431941  | -0.407852 | C                                                                                  | -0.267156 | 3.42636   | 0.614028  |
| C                                                                                 | -2.082674 | 3.750667  | -1.224947 | C                                                                                  | 1.95498   | 3.639774  | 1.471338  |
| C                                                                                 | -2.381665 | 2.412312  | -0.953752 | C                                                                                  | 2.221554  | 2.314614  | 1.142032  |
| C                                                                                 | -1.43463  | 1.548818  | -0.406039 | C                                                                                  | 1.265601  | 1.500128  | 0.528091  |
| C                                                                                 | -0.15252  | 2.090858  | -0.155088 | C                                                                                  | 0.006458  | 2.08811   | 0.278301  |
| C                                                                                 | 0.864491  | 1.175513  | 0.3437    | C                                                                                  | -1.018532 | 1.263476  | -0.328281 |
| S                                                                                 | 0.383511  | -0.482336 | 0.514643  | S                                                                                  | -0.563349 | -0.328413 | -0.734158 |
| N                                                                                 | 2.069997  | 1.662955  | 0.60919   | N                                                                                  | -2.236458 | 1.799378  | -0.507656 |
| S                                                                                 | 3.252204  | 0.698313  | 1.15142   | S                                                                                  | -3.430205 | 0.911662  | -1.101274 |
| O                                                                                 | 3.08718   | -0.048168 | 2.395031  | O                                                                                  | -3.34001  | 0.313954  | -2.432599 |
| C                                                                                 | 4.556309  | 1.886193  | 1.324436  | C                                                                                  | -4.757526 | 2.086686  | -1.055561 |
| C                                                                                 | 3.765543  | -0.376897 | -0.168404 | C                                                                                  | -3.880856 | -0.331734 | 0.094991  |
| C                                                                                 | 4.118793  | -1.678612 | 0.169284  | C                                                                                  | -4.302485 | -1.565476 | -0.38829  |
| C                                                                                 | 4.553889  | -2.523481 | -0.845993 | C                                                                                  | -4.69373  | -2.534936 | 0.52968   |
| C                                                                                 | 4.625322  | -2.060733 | -2.156758 | C                                                                                  | -4.657677 | -2.258966 | 1.893523  |
| C                                                                                 | 4.259686  | -0.753241 | -2.473249 | C                                                                                  | -4.225136 | -1.01715  | 2.357376  |
| C                                                                                 | 3.821707  | 0.106163  | -1.474813 | C                                                                                  | -3.829266 | -0.037014 | 1.456015  |
| H                                                                                 | -2.846172 | 4.395652  | -1.65489  | H                                                                                  | 2.730804  | 4.239441  | 1.943594  |
| H                                                                                 | -3.383808 | 2.057384  | -1.185286 | H                                                                                  | 3.204504  | 1.915618  | 1.385579  |
| H                                                                                 | 5.446276  | 1.342201  | 1.650421  | H                                                                                  | -5.655912 | 1.572879  | -1.406467 |
| H                                                                                 | 4.72219   | 2.38878   | 0.369119  | H                                                                                  | -4.8808   | 2.458162  | -0.036048 |
| H                                                                                 | 4.233289  | 2.599423  | 2.08733   | H                                                                                  | -4.483628 | 2.898929  | -1.733656 |
| H                                                                                 | 4.039882  | -2.014165 | 1.200344  | H                                                                                  | -4.311088 | -1.753428 | -1.459249 |

|                        |           |           |           |          |           |           |           |
|------------------------|-----------|-----------|-----------|----------|-----------|-----------|-----------|
| H                      | 4.836296  | -3.545935 | -0.61118  | H        | -5.030162 | -3.505982 | 0.176844  |
| H                      | 4.968883  | -2.726931 | -2.943802 | H        | -4.97082  | -3.018716 | 2.605018  |
| H                      | 4.313534  | -0.403931 | -3.500486 | H        | -4.19735  | -0.811974 | 3.423995  |
| H                      | 3.51798   | 1.124986  | -1.707501 | H        | -3.475164 | 0.932184  | 1.802463  |
| Co                     | -1.729716 | -0.317251 | -0.027627 | Co       | 1.571777  | -0.353602 | 0.012275  |
| H                      | 1.146764  | 3.805149  | -0.186631 | H        | -1.253294 | 3.828709  | 0.39512   |
| H                      | -0.598023 | 5.310649  | -1.145156 | H        | 0.505455  | 5.242001  | 1.462379  |
| C                      | -2.278535 | -2.203594 | 0.711794  | C        | 2.104327  | -1.694723 | -1.558932 |
| C                      | -2.921507 | -1.097846 | 1.368845  | C        | 2.293735  | -0.301759 | -1.912779 |
| C                      | -3.744709 | -0.389695 | 0.411277  | C        | 3.307705  | 0.23805   | -1.067734 |
| C                      | -3.493204 | -0.963146 | -0.852274 | C        | 3.627041  | -0.750871 | -0.093763 |
| C                      | -2.572625 | -2.077743 | -0.662288 | C        | 2.921956  | -1.964113 | -0.443032 |
| C                      | -4.669583 | 0.718496  | 0.765291  | C        | 3.953961  | 1.559802  | -1.278318 |
| H                      | -5.46763  | 0.341158  | 1.416939  | H        | 4.603453  | 1.497811  | -2.161579 |
| H                      | -4.155071 | 1.521471  | 1.304305  | H        | 3.220918  | 2.351955  | -1.461206 |
| H                      | -5.146477 | 1.156822  | -0.115674 | H        | 4.578245  | 1.864325  | -0.434526 |
| C                      | -4.038038 | -0.558939 | -2.1744   | C        | 4.668055  | -0.663291 | 0.965404  |
| H                      | -4.643313 | -1.366318 | -2.605597 | H        | 5.623442  | -1.062341 | 0.599493  |
| H                      | -4.671045 | 0.329797  | -2.104231 | H        | 4.852121  | 0.368711  | 1.283579  |
| H                      | -3.232895 | -0.338321 | -2.886002 | H        | 4.392167  | -1.248479 | 1.850012  |
| C                      | -1.99129  | -2.856869 | -1.783176 | C        | 3.100978  | -3.258687 | 0.265129  |
| H                      | -1.14446  | -3.469347 | -1.461716 | H        | 2.422242  | -4.031887 | -0.105988 |
| H                      | -2.743767 | -3.522582 | -2.226113 | H        | 4.124733  | -3.626915 | 0.121814  |
| H                      | -1.644073 | -2.188106 | -2.580656 | H        | 2.943681  | -3.152697 | 1.345315  |
| C                      | -1.38913  | -3.208061 | 1.355004  | C        | 1.251208  | -2.660444 | -2.303861 |
| H                      | -0.657593 | -3.614118 | 0.648837  | H        | 1.014734  | -3.548649 | -1.709245 |
| H                      | -0.83349  | -2.779793 | 2.195346  | H        | 0.30586   | -2.213623 | -2.629858 |
| H                      | -1.97742  | -4.048641 | 1.742117  | H        | 1.773495  | -3.002259 | -3.20652  |
| C                      | -2.806023 | -0.735558 | 2.801834  | C        | 1.711005  | 0.407228  | -3.083564 |
| H                      | -1.854927 | -1.063455 | 3.231244  | H        | 0.8242    | -0.097793 | -3.47521  |
| H                      | -2.886905 | 0.347563  | 2.941081  | H        | 1.422287  | 1.432612  | -2.82372  |
| H                      | -3.615091 | -1.204201 | 3.379127  | H        | 2.449219  | 0.469187  | -3.894246 |
|                        |           |           |           | C        | 1.42775   | -0.659014 | 2.141752  |
|                        |           |           |           | C        | 0.756922  | -1.535254 | 1.578203  |
|                        |           |           |           | C        | -0.106701 | -2.697415 | 1.358364  |
|                        |           |           |           | H        | 0.202329  | -3.283062 | 0.485632  |
|                        |           |           |           | H        | -0.075666 | -3.350992 | 2.237536  |
|                        |           |           |           | H        | -1.144806 | -2.387268 | 1.193417  |
|                        |           |           |           | C        | 2.043607  | 0.085037  | 3.241883  |
|                        |           |           |           | H        | 1.544196  | 1.045343  | 3.404211  |
|                        |           |           |           | H        | 1.962426  | -0.508275 | 4.159353  |
|                        |           |           |           | H        | 3.104941  | 0.28971   | 3.067018  |
| <b>T<sub>SEF</sub></b> |           |           |           | <b>F</b> |           |           |           |

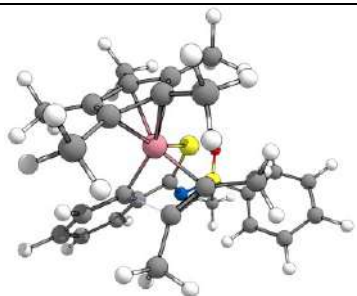

Thermal correction to Gibbs Free Energy=  
0.444350

E(RM06) = -2158.12604730

E(SCRF) = -2158.20329388

Frequency -243.8195

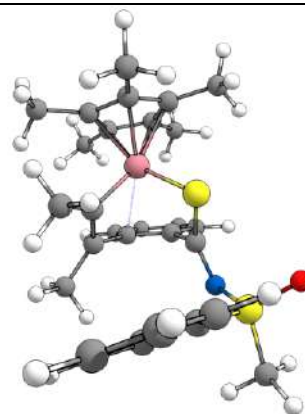

Thermal correction to Gibbs Free Energy=  
0.441945

E(RM06) = -2158.15189480

E(SCRF) = -2158.22956772

|    |           |           |           |    |           |           |           |
|----|-----------|-----------|-----------|----|-----------|-----------|-----------|
| C  | 0.843982  | -0.021438 | 1.879717  | C  | 0.185931  | -0.000841 | 2.065598  |
| C  | 1.240485  | 1.41975   | 0.636389  | C  | 0.829294  | 1.223917  | 1.507277  |
| C  | 2.25731   | 2.224294  | 1.183983  | C  | 1.818954  | 1.935082  | 2.215607  |
| C  | 2.115582  | 3.596813  | 1.303632  | C  | 2.354691  | 3.111212  | 1.7289    |
| C  | 0.926961  | 4.228273  | 0.921404  | C  | 1.926631  | 3.623448  | 0.495948  |
| C  | -0.09723  | 3.470966  | 0.387259  | C  | 0.950196  | 2.962431  | -0.221151 |
| H  | 0.814727  | 5.302596  | 1.036476  | H  | 2.343366  | 4.552828  | 0.116075  |
| C  | 0.063033  | 2.087178  | 0.20494   | C  | 0.389143  | 1.770229  | 0.274982  |
| H  | -1.026384 | 3.931367  | 0.060132  | H  | 0.573423  | 3.370643  | -1.157337 |
| H  | 2.932219  | 4.185444  | 1.715981  | H  | 3.105043  | 3.645991  | 2.306458  |
| H  | 3.166983  | 1.754982  | 1.553696  | H  | 2.14528   | 1.546128  | 3.17898   |
| Co | 1.525884  | -0.398289 | -0.077019 | Co | 1.424756  | -0.415057 | -0.187731 |
| C  | -0.965576 | 1.313664  | -0.457343 | C  | -0.794578 | 1.221841  | -0.450121 |
| S  | -0.499993 | -0.212506 | -1.054534 | S  | -0.499049 | -0.173654 | -1.356631 |
| N  | -2.195407 | 1.852445  | -0.537096 | N  | -1.913273 | 1.92122   | -0.298846 |
| S  | -3.412547 | 0.974394  | -1.091758 | S  | -3.272682 | 1.32564   | -0.963753 |
| O  | -3.433013 | 0.458254  | -2.459494 | O  | -3.372668 | 1.144276  | -2.409162 |
| C  | -4.758872 | 2.103537  | -0.852128 | C  | -4.446728 | 2.530702  | -0.406077 |
| C  | -3.712308 | -0.354775 | 0.063613  | C  | -3.680867 | -0.178729 | -0.104726 |
| H  | -5.671746 | 1.587487  | -1.159583 | H  | -5.430701 | 2.206811  | -0.754    |
| H  | -4.801234 | 2.403671  | 0.196949  | H  | -4.407892 | 2.600565  | 0.683005  |
| H  | -4.56471  | 2.9657    | -1.495309 | H  | -4.164022 | 3.481736  | -0.865043 |
| C  | -4.157055 | -1.566934 | -0.451987 | C  | -4.213373 | -1.222697 | -0.8528   |
| C  | -3.522461 | -0.146642 | 1.42868   | C  | -3.477103 | -0.264517 | 1.271439  |
| C  | -4.432261 | -2.602382 | 0.436068  | C  | -4.565552 | -2.39304  | -0.18838  |
| H  | -4.270405 | -1.688881 | -1.526545 | H  | -4.335021 | -1.116245 | -1.928    |
| C  | -4.261476 | -2.411638 | 1.80448   | C  | -4.385519 | -2.495735 | 1.188291  |
| H  | -4.78321  | -3.558126 | 0.056558  | H  | -4.983472 | -3.22471  | -0.748582 |
| C  | -3.80486  | -1.1909   | 2.300154  | C  | -3.841732 | -1.438351 | 1.916683  |
| H  | -4.484974 | -3.222192 | 2.493387  | H  | -4.66976  | -3.410825 | 1.701322  |
| H  | -3.669766 | -1.052252 | 3.369625  | H  | -3.70103  | -1.52928  | 2.990817  |
| H  | -3.149104 | 0.806712  | 1.798947  | H  | -3.026486 | 0.560838  | 1.820092  |
| C  | 2.495017  | -0.594148 | -1.899812 | C  | 2.627319  | -0.739876 | -1.918218 |
| C  | 3.555227  | -0.839945 | 0.129178  | C  | 3.45887   | -0.591078 | 0.232197  |



|                                                                                                                                    |           |           |           |                                                                                                              |           |           |           |
|------------------------------------------------------------------------------------------------------------------------------------|-----------|-----------|-----------|--------------------------------------------------------------------------------------------------------------|-----------|-----------|-----------|
| C                                                                                                                                  | 0.445273  | -1.124731 | 1.369483  | C                                                                                                            | 0.302483  | -1.053631 | 1.247913  |
| C                                                                                                                                  | 2.140298  | -1.895553 | -1.354933 | C                                                                                                            | 2.255656  | -1.941586 | -1.179629 |
| C                                                                                                                                  | 2.843979  | -2.056421 | -0.134009 | C                                                                                                            | 2.879083  | -1.8772   | 0.113606  |
| C                                                                                                                                  | 1.267349  | -2.907458 | -2.012161 | C                                                                                                            | 1.533283  | -3.112407 | -1.745051 |
| C                                                                                                                                  | 3.390204  | 0.033253  | -1.001835 | C                                                                                                            | 3.343362  | 0.089505  | -1.046691 |
| C                                                                                                                                  | 2.078472  | -0.02023  | -3.20805  | C                                                                                                            | 2.266767  | -0.438238 | -3.330287 |
| C                                                                                                                                  | 4.048445  | 1.342882  | -1.255058 | C                                                                                                            | 3.907054  | 1.430566  | -1.348522 |
| C                                                                                                                                  | 4.414386  | -0.624545 | 1.325657  | C                                                                                                            | 4.222959  | -0.116515 | 1.415756  |
| C                                                                                                                                  | 2.870456  | -3.249455 | 0.753573  | C                                                                                                            | 2.959675  | -2.942759 | 1.147935  |
| H                                                                                                                                  | 4.768467  | 1.242373  | -2.077145 | H                                                                                                            | 4.974951  | 1.35213   | -1.590235 |
| H                                                                                                                                  | 3.323402  | 2.112704  | -1.543893 | H                                                                                                            | 3.407511  | 1.900617  | -2.201902 |
| H                                                                                                                                  | 4.596835  | 1.711715  | -0.384429 | H                                                                                                            | 3.815857  | 2.109481  | -0.493186 |
| H                                                                                                                                  | 5.247545  | -1.338826 | 1.337933  | H                                                                                                            | 5.235322  | -0.542677 | 1.409039  |
| H                                                                                                                                  | 4.850999  | 0.378319  | 1.349148  | H                                                                                                            | 4.323275  | 0.972805  | 1.432747  |
| H                                                                                                                                  | 3.848918  | -0.774225 | 2.254426  | H                                                                                                            | 3.74187   | -0.428892 | 2.350198  |
| H                                                                                                                                  | 2.154411  | -4.014655 | 0.43867   | H                                                                                                            | 2.373414  | -3.826295 | 0.880857  |
| H                                                                                                                                  | 3.865616  | -3.711806 | 0.730798  | H                                                                                                            | 4.001866  | -3.268868 | 1.258288  |
| H                                                                                                                                  | 2.662783  | -2.987208 | 1.798862  | H                                                                                                            | 2.624453  | -2.588568 | 2.129816  |
| H                                                                                                                                  | 0.711598  | -3.499153 | -1.276215 | H                                                                                                            | 1.080038  | -3.726026 | -0.959977 |
| H                                                                                                                                  | 0.533892  | -2.440701 | -2.677513 | H                                                                                                            | 0.73441   | -2.810212 | -2.430845 |
| H                                                                                                                                  | 1.863137  | -3.602071 | -2.617339 | H                                                                                                            | 2.220967  | -3.753679 | -2.312059 |
| H                                                                                                                                  | 1.229378  | -0.549971 | -3.647645 | H                                                                                                            | 1.384804  | -0.997472 | -3.657767 |
| H                                                                                                                                  | 1.7942    | 1.033875  | -3.104932 | H                                                                                                            | 2.049836  | 0.626315  | -3.472934 |
| H                                                                                                                                  | 2.909641  | -0.070048 | -3.923619 | H                                                                                                            | 3.091531  | -0.704311 | -4.003168 |
| C                                                                                                                                  | 1.023391  | 0.607325  | 3.214088  | C                                                                                                            | -0.51386  | 0.103624  | 3.389626  |
| C                                                                                                                                  | -0.336103 | -2.356081 | 1.551291  | C                                                                                                            | -0.371201 | -2.372736 | 1.341427  |
| H                                                                                                                                  | 0.238285  | -3.251171 | 1.290295  | H                                                                                                            | 0.333064  | -3.212689 | 1.351328  |
| H                                                                                                                                  | -0.667202 | -2.453688 | 2.593511  | H                                                                                                            | -0.997531 | -2.45735  | 2.240876  |
| H                                                                                                                                  | -1.22958  | -2.338119 | 0.912804  | H                                                                                                            | -1.029318 | -2.511862 | 0.469663  |
| H                                                                                                                                  | 0.542108  | 1.590733  | 3.273262  | H                                                                                                            | -1.285154 | 0.888139  | 3.375923  |
| H                                                                                                                                  | 0.584891  | -0.056088 | 3.968636  | H                                                                                                            | -0.983228 | -0.843064 | 3.675407  |
| H                                                                                                                                  | 2.082133  | 0.744029  | 3.462231  | H                                                                                                            | 0.181851  | 0.374291  | 4.195042  |
| <b>TS<sub>FG</sub></b>                                                                                                             |           |           |           | <b>G</b>                                                                                                     |           |           |           |
|                                                 |           |           |           |                          |           |           |           |
| Thermal correction to Gibbs Free Energy=<br>0.443255<br>E(RM06) = -2158.13981513<br>E(SCRF) = -2158.21737849<br>Frequency -85.9033 |           |           |           | Thermal correction to Gibbs Free Energy=<br>0.445419<br>E(RM06) = -2158.15934355<br>E(SCRF) = -2158.23626483 |           |           |           |
| C                                                                                                                                  | 0.654083  | -1.02122  | 1.372905  | C                                                                                                            | 0.461573  | -0.887183 | 1.488072  |

|    |           |           |           |    |           |           |           |
|----|-----------|-----------|-----------|----|-----------|-----------|-----------|
| S  | -0.587732 | -0.391482 | -0.627223 | S  | -0.589831 | -0.521076 | 0.051351  |
| C  | 0.962632  | 0.181085  | 1.939534  | C  | 1.301453  | 0.15491   | 1.904457  |
| C  | 1.055651  | 1.482614  | 1.217115  | C  | 1.375646  | 1.354672  | 1.092286  |
| C  | 1.408232  | 0.183131  | 3.385027  | C  | 2.173414  | -0.055679 | 3.111593  |
| C  | 2.052221  | 2.38175   | 1.671289  | C  | 2.514778  | 2.227075  | 1.307569  |
| C  | 0.053128  | 2.038815  | 0.356664  | C  | 0.184065  | 2.001634  | 0.507945  |
| Co | 1.598035  | -0.524633 | -0.104565 | Co | 1.640809  | -0.508404 | -0.017706 |
| C  | 2.068437  | 3.715114  | 1.313138  | C  | 2.465078  | 3.559933  | 1.064205  |
| H  | 2.829213  | 2.008198  | 2.334118  | H  | 3.428801  | 1.788652  | 1.701207  |
| C  | 1.054988  | 4.249329  | 0.509817  | C  | 1.264384  | 4.18393   | 0.590937  |
| H  | 2.870056  | 4.354663  | 1.675234  | H  | 3.345208  | 4.171875  | 1.248012  |
| C  | 0.052412  | 3.414547  | 0.06327   | C  | 0.165693  | 3.428616  | 0.346276  |
| H  | 1.060705  | 5.300033  | 0.235523  | H  | 1.246714  | 5.256252  | 0.419127  |
| H  | -0.745336 | 3.792699  | -0.570343 | H  | -0.750472 | 3.867814  | -0.039549 |
| C  | -0.985077 | 1.222533  | -0.228201 | C  | -0.902989 | 1.257106  | 0.119189  |
| C  | 3.632082  | -0.515125 | -0.258629 | C  | 3.641842  | -0.685312 | -0.435665 |
| C  | 2.275786  | -2.030446 | -1.311432 | C  | 2.031023  | -2.05532  | -1.327104 |
| N  | -2.194444 | 1.794931  | -0.388108 | N  | -2.128778 | 1.786049  | -0.160124 |
| S  | -3.394281 | 0.978363  | -1.063068 | S  | -3.17115  | 0.999376  | -1.042483 |
| O  | -3.283876 | 0.45772   | -2.425783 | O  | -2.749776 | 0.311692  | -2.26996  |
| C  | -4.695743 | 2.17898   | -0.966675 | C  | -4.366019 | 2.260717  | -1.40449  |
| C  | -3.882022 | -0.330172 | 0.04462   | C  | -4.066969 | -0.166834 | -0.02891  |
| H  | -5.598272 | 1.71088   | -1.36746  | H  | -5.188326 | 1.782597  | -1.943034 |
| H  | -4.829918 | 2.482884  | 0.073669  | H  | -4.710075 | 2.706891  | -0.468894 |
| H  | -4.391528 | 3.028831  | -1.582913 | H  | -3.867615 | 3.00416   | -2.031257 |
| C  | -4.349731 | -1.511227 | -0.520546 | C  | -4.534909 | -1.332896 | -0.627214 |
| C  | -3.766296 | -0.15167  | 1.42198   | C  | -4.285919 | 0.122065  | 1.316455  |
| C  | -4.720192 | -2.547448 | 0.329988  | C  | -5.248395 | -2.235933 | 0.153404  |
| H  | -4.402383 | -1.613417 | -1.601661 | H  | -4.328279 | -1.524897 | -1.677302 |
| C  | -4.138145 | -1.198501 | 2.25493   | C  | -5.003205 | -0.790221 | 2.08028   |
| H  | -3.377779 | 0.780037  | 1.829415  | H  | -3.89005  | 1.037621  | 1.752938  |
| C  | -4.613295 | -2.390185 | 1.708927  | C  | -5.481615 | -1.962986 | 1.498475  |
| H  | -5.090027 | -3.480433 | -0.086308 | H  | -5.622763 | -3.154729 | -0.289777 |
| H  | -4.904098 | -3.20476  | 2.367218  | H  | -6.042978 | -2.671645 | 2.10189   |
| H  | -4.05954  | -1.084814 | 3.332752  | H  | -5.188905 | -0.587411 | 3.131568  |
| C  | 2.241394  | -0.77202  | -2.057866 | C  | 1.97641   | -0.769979 | -2.016033 |
| C  | 3.096051  | 0.150257  | -1.420534 | C  | 2.997885  | 0.056839  | -1.496123 |
| C  | 1.468894  | -0.539701 | -3.308016 | C  | 1.013023  | -0.388889 | -3.0863   |
| C  | 3.1987    | -1.881166 | -0.243777 | C  | 3.094039  | -2.010323 | -0.392984 |
| C  | 4.561542  | 0.090212  | 0.731407  | C  | 4.816306  | -0.224809 | 0.352273  |
| C  | 0.251209  | -2.314378 | 1.959654  | C  | 0.229239  | -2.183784 | 2.188365  |
| C  | 1.514576  | -3.256546 | -1.673239 | C  | 1.155266  | -3.223582 | -1.616986 |
| C  | 3.603568  | -2.894785 | 0.768734  | C  | 3.534008  | -3.096974 | 0.524275  |
| H  | 1.456328  | -3.955984 | -0.832827 | H  | 1.100514  | -3.911096 | -0.766067 |
| H  | 0.489502  | -3.019679 | -1.981372 | H  | 0.134101  | -2.91975  | -1.871973 |
| H  | 1.988695  | -3.783613 | -2.511296 | H  | 1.54197   | -3.794431 | -2.470988 |
| C  | 3.324917  | 1.573155  | -1.793448 | C  | 3.32104   | 1.441652  | -1.930369 |
| H  | 0.609157  | -1.210723 | -3.394756 | H  | 0.121035  | -1.022444 | -3.083351 |

|                                                                                                              |           |           |           |                                                                                                              |           |           |           |
|--------------------------------------------------------------------------------------------------------------|-----------|-----------|-----------|--------------------------------------------------------------------------------------------------------------|-----------|-----------|-----------|
| H                                                                                                            | 1.09487   | 0.487408  | -3.373219 | H                                                                                                            | 0.674749  | 0.646964  | -2.965306 |
| H                                                                                                            | 2.110865  | -0.716218 | -4.180491 | H                                                                                                            | 1.478996  | -0.473168 | -4.076159 |
| H                                                                                                            | 4.30373   | 1.713494  | -2.269126 | H                                                                                                            | 4.117946  | 1.43979   | -2.684815 |
| H                                                                                                            | 2.561547  | 1.926308  | -2.494172 | H                                                                                                            | 2.447838  | 1.934829  | -2.371997 |
| H                                                                                                            | 3.286788  | 2.229243  | -0.914201 | H                                                                                                            | 3.65627   | 2.064316  | -1.093678 |
| H                                                                                                            | 5.599255  | -0.176164 | 0.491015  | H                                                                                                            | 5.734221  | -0.677191 | -0.045574 |
| H                                                                                                            | 4.494385  | 1.18232   | 0.737313  | H                                                                                                            | 4.94142   | 0.860507  | 0.301572  |
| H                                                                                                            | 4.363859  | -0.272966 | 1.747034  | H                                                                                                            | 4.752846  | -0.515514 | 1.407505  |
| H                                                                                                            | 2.933961  | -3.761013 | 0.775385  | H                                                                                                            | 2.722028  | -3.796061 | 0.752281  |
| H                                                                                                            | 4.615302  | -3.269447 | 0.567338  | H                                                                                                            | 4.349347  | -3.681362 | 0.07848   |
| H                                                                                                            | 3.61706   | -2.47121  | 1.781478  | H                                                                                                            | 3.90997   | -2.698407 | 1.473924  |
| H                                                                                                            | 1.128557  | 1.118366  | 3.883192  | H                                                                                                            | 2.514318  | 0.896533  | 3.525995  |
| H                                                                                                            | 0.952599  | -0.651173 | 3.927522  | H                                                                                                            | 1.611492  | -0.574325 | 3.895417  |
| H                                                                                                            | 2.496351  | 0.068821  | 3.483746  | H                                                                                                            | 3.05826   | -0.66835  | 2.89204   |
| H                                                                                                            | 1.138498  | -2.901485 | 2.235525  | H                                                                                                            | 1.183113  | -2.608392 | 2.522265  |
| H                                                                                                            | -0.379263 | -2.197469 | 2.85046   | H                                                                                                            | -0.417893 | -2.060626 | 3.066103  |
| H                                                                                                            | -0.305757 | -2.906504 | 1.223301  | H                                                                                                            | -0.24715  | -2.911431 | 1.522861  |
| <b>PhSOMe</b>                                                                                                |           |           |           | <b>H</b>                                                                                                     |           |           |           |
|                            |           |           |           |                           |           |           |           |
| Thermal correction to Gibbs Free Energy=<br>0.084214<br>E(RM06) = -744.752363361<br>E(SCRF) = -744.768611573 |           |           |           | Thermal correction to Gibbs Free Energy=<br>0.365529<br>E(RM06) = -1642.05466419<br>E(SCRF) = -1642.08657482 |           |           |           |
| S                                                                                                            | 1.676724  | -0.143615 | -0.469103 | H                                                                                                            | 0.49177   | -0.122071 | 1.785422  |
| O                                                                                                            | 2.195908  | 1.258264  | -0.348631 | C                                                                                                            | -0.35941  | 0.557752  | 1.557399  |
| C                                                                                                            | 2.032289  | -0.953476 | 1.12669   | C                                                                                                            | -0.507626 | 1.729478  | 2.293416  |
| C                                                                                                            | -0.116072 | -0.066849 | -0.204918 | C                                                                                                            | -1.72862  | 2.396621  | 2.261547  |
| C                                                                                                            | -0.664492 | 1.150177  | 0.172414  | C                                                                                                            | -2.78566  | 1.890307  | 1.513804  |
| C                                                                                                            | -2.040275 | 1.238343  | 0.361735  | C                                                                                                            | -2.674599 | 0.698519  | 0.775213  |
| C                                                                                                            | -2.845072 | 0.119998  | 0.165771  | H                                                                                                            | -3.729933 | 2.428401  | 1.517215  |
| C                                                                                                            | -2.281482 | -1.092467 | -0.225958 | C                                                                                                            | -1.426319 | 0.044791  | 0.804616  |
| C                                                                                                            | -0.908256 | -1.189143 | -0.420398 | H                                                                                                            | -1.870596 | 3.308568  | 2.837439  |
| H                                                                                                            | 1.678622  | -0.292589 | 1.926333  | H                                                                                                            | 0.312044  | 2.093269  | 2.909665  |
| H                                                                                                            | 1.532538  | -1.927206 | 1.177726  | Co                                                                                                           | 1.274699  | -0.034903 | -0.08644  |
| H                                                                                                            | 3.117214  | -1.080237 | 1.19908   | C                                                                                                            | -1.103402 | -1.130312 | -0.019669 |
| H                                                                                                            | -0.000566 | 2.005085  | 0.299838  | N                                                                                                            | 0.047472  | -1.420957 | -0.451434 |
| H                                                                                                            | -2.48739  | 2.185207  | 0.65977   | O                                                                                                            | 2.448165  | -1.290247 | 0.751148  |

|                                                                                                 |           |           |           |                        |           |           |           |
|-------------------------------------------------------------------------------------------------|-----------|-----------|-----------|------------------------|-----------|-----------|-----------|
| H                                                                                               | -3.921411 | 0.1941    | 0.310461  | C                      | 1.013657  | 0.625353  | -2.050801 |
| H                                                                                               | -2.915618 | -1.962218 | -0.388203 | C                      | 2.123773  | 1.898159  | -0.449186 |
| H                                                                                               | -0.458083 | -2.129914 | -0.742322 | C                      | 2.164706  | -1.953172 | 1.830781  |
|                                                                                                 |           |           |           | O                      | 1.217094  | -1.745573 | 2.581085  |
|                                                                                                 |           |           |           | C                      | 3.158755  | -3.060931 | 2.111466  |
|                                                                                                 |           |           |           | H                      | 4.184825  | -2.691034 | 2.016759  |
|                                                                                                 |           |           |           | H                      | 3.028661  | -3.854667 | 1.368094  |
|                                                                                                 |           |           |           | H                      | 2.99616   | -3.471651 | 3.109998  |
|                                                                                                 |           |           |           | C                      | 2.298995  | 0.029533  | -1.779241 |
|                                                                                                 |           |           |           | C                      | 3.015744  | 0.903797  | -0.868161 |
|                                                                                                 |           |           |           | C                      | 2.855349  | -1.210943 | -2.375538 |
|                                                                                                 |           |           |           | C                      | 0.87354   | 1.727328  | -1.179301 |
|                                                                                                 |           |           |           | C                      | -0.004216 | 0.090064  | -2.991587 |
|                                                                                                 |           |           |           | C                      | -0.285965 | 2.655925  | -1.102638 |
|                                                                                                 |           |           |           | C                      | 2.392923  | 2.968689  | 0.551033  |
|                                                                                                 |           |           |           | C                      | 4.388978  | 0.648825  | -0.367663 |
|                                                                                                 |           |           |           | H                      | -0.073109 | 3.572878  | -1.668423 |
|                                                                                                 |           |           |           | H                      | -1.193506 | 2.208176  | -1.519915 |
|                                                                                                 |           |           |           | H                      | -0.50924  | 2.94559   | -0.069851 |
|                                                                                                 |           |           |           | H                      | 2.884979  | 3.83138   | 0.082508  |
|                                                                                                 |           |           |           | H                      | 1.464845  | 3.326938  | 1.007682  |
|                                                                                                 |           |           |           | H                      | 3.043385  | 2.609619  | 1.355909  |
|                                                                                                 |           |           |           | H                      | 5.086921  | 0.508504  | -1.201846 |
|                                                                                                 |           |           |           | H                      | 4.755388  | 1.475643  | 0.248072  |
|                                                                                                 |           |           |           | H                      | 4.389429  | -0.268943 | 0.235558  |
|                                                                                                 |           |           |           | H                      | 3.311901  | -1.820747 | -1.587966 |
|                                                                                                 |           |           |           | H                      | 2.069773  | -1.80933  | -2.845093 |
|                                                                                                 |           |           |           | H                      | 3.619476  | -0.984293 | -3.131042 |
|                                                                                                 |           |           |           | H                      | -0.069794 | -1.000392 | -2.911336 |
|                                                                                                 |           |           |           | H                      | -1.001674 | 0.489683  | -2.775986 |
|                                                                                                 |           |           |           | H                      | 0.25178   | 0.351811  | -4.026106 |
|                                                                                                 |           |           |           | S                      | -2.485027 | -2.231833 | -0.403227 |
|                                                                                                 |           |           |           | C                      | -3.833869 | -1.09938  | -0.460103 |
|                                                                                                 |           |           |           | C                      | -3.812803 | 0.166968  | 0.025051  |
|                                                                                                 |           |           |           | C                      | -5.013682 | 1.059348  | -0.131813 |
|                                                                                                 |           |           |           | H                      | -4.719661 | 2.057972  | -0.479979 |
|                                                                                                 |           |           |           | H                      | -5.728944 | 0.665829  | -0.857184 |
|                                                                                                 |           |           |           | H                      | -5.551676 | 1.197444  | 0.817028  |
|                                                                                                 |           |           |           | C                      | -5.034455 | -1.720131 | -1.120235 |
|                                                                                                 |           |           |           | H                      | -5.952881 | -1.526375 | -0.556244 |
|                                                                                                 |           |           |           | H                      | -5.173793 | -1.330965 | -2.137338 |
|                                                                                                 |           |           |           | H                      | -4.922094 | -2.805775 | -1.205704 |
| <b>I</b><br> |           |           |           | <b>TS<sub>HJ</sub></b> |           |           |           |

|                                                                                                              |           |           |           |                                                                                                                                                                                                                            |           |           |           |
|--------------------------------------------------------------------------------------------------------------|-----------|-----------|-----------|----------------------------------------------------------------------------------------------------------------------------------------------------------------------------------------------------------------------------|-----------|-----------|-----------|
| Thermal correction to Gibbs Free Energy=<br>0.137052<br>E(RM06) = -878.467412469<br>E(SCRF) = -878.483632672 |           |           |           | 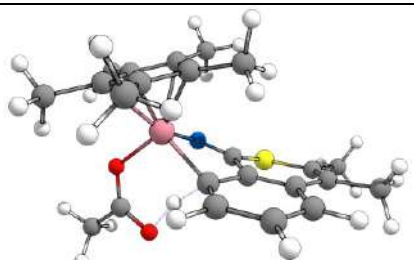<br>Thermal correction to Gibbs Free Energy=<br>0.361824<br>E(RM06) = -1642.04224088<br>E(SCRF) = -1642.06998028<br>Frequency -1509.2993 |           |           |           |
| C                                                                                                            | 3.303598  | -0.006018 | 0.000171  | H                                                                                                                                                                                                                          | 0.41398   | -0.268125 | 1.802298  |
| C                                                                                                            | 2.934215  | -1.349017 | 0.000245  | O                                                                                                                                                                                                                          | 0.805952  | -1.225117 | 2.675705  |
| C                                                                                                            | 1.596255  | -1.698459 | 0.000154  | C                                                                                                                                                                                                                          | 1.809535  | -1.745249 | 2.125189  |
| C                                                                                                            | 0.567056  | -0.736741 | -0.000009 | O                                                                                                                                                                                                                          | 2.264031  | -1.390298 | 0.998879  |
| C                                                                                                            | 0.957711  | 0.623438  | -0.000052 | Co                                                                                                                                                                                                                         | 1.262252  | -0.090298 | -0.070878 |
| C                                                                                                            | 2.317794  | 0.961431  | 0.000023  | C                                                                                                                                                                                                                          | -0.248112 | 0.647412  | 1.186025  |
| C                                                                                                            | -0.825695 | -1.19165  | -0.000127 | C                                                                                                                                                                                                                          | -0.313998 | 1.841073  | 1.910232  |
| C                                                                                                            | -1.877237 | -0.343522 | 0.000101  | C                                                                                                                                                                                                                          | -1.431262 | 0.156708  | 0.592661  |
| S                                                                                                            | -1.72941  | 1.408766  | 0.000445  | C                                                                                                                                                                                                                          | -1.519449 | 2.529793  | 2.010136  |
| C                                                                                                            | 0.019072  | 1.758122  | -0.000219 | H                                                                                                                                                                                                                          | 0.572434  | 2.215172  | 2.421791  |
| C                                                                                                            | -1.077501 | -2.674523 | -0.000517 | C                                                                                                                                                                                                                          | -2.670308 | 2.026743  | 1.412944  |
| C                                                                                                            | -3.322792 | -0.761641 | 0.000088  | H                                                                                                                                                                                                                          | -1.576216 | 3.457668  | 2.576337  |
| N                                                                                                            | 0.434674  | 2.965257  | -0.000671 | C                                                                                                                                                                                                                          | -2.668579 | 0.815141  | 0.697309  |
| H                                                                                                            | 4.353207  | 0.281168  | 0.000233  | H                                                                                                                                                                                                                          | -3.597365 | 2.583748  | 1.523838  |
| H                                                                                                            | 3.693309  | -2.129511 | 0.000381  | C                                                                                                                                                                                                                          | -3.895292 | 0.276339  | 0.106445  |
| H                                                                                                            | 1.339866  | -2.754221 | 0.000225  | C                                                                                                                                                                                                                          | -1.17717  | -1.05632  | -0.185101 |
| H                                                                                                            | 2.56759   | 2.019602  | -0.000034 | N                                                                                                                                                                                                                          | -0.008838 | -1.433257 | -0.50427  |
| H                                                                                                            | -2.143648 | -2.914059 | -0.001045 | C                                                                                                                                                                                                                          | 2.600551  | -0.212382 | -1.608078 |
| H                                                                                                            | -0.637329 | -3.158    | -0.884045 | C                                                                                                                                                                                                                          | 1.053313  | 1.474669  | -1.412331 |
| H                                                                                                            | -0.638098 | -3.158378 | 0.883192  | S                                                                                                                                                                                                                          | -2.594282 | -2.059682 | -0.661355 |
| H                                                                                                            | -3.568854 | -1.359472 | -0.887155 | C                                                                                                                                                                                                                          | 1.382909  | 0.297438  | -2.144183 |
| H                                                                                                            | -3.56876  | -1.360012 | 0.886989  | C                                                                                                                                                                                                                          | 0.560253  | -0.380414 | -3.178477 |
| H                                                                                                            | -3.992052 | 0.106549  | 0.000382  | C                                                                                                                                                                                                                          | 2.173073  | 1.789037  | -0.540409 |
| H                                                                                                            | -0.332236 | 3.640765  | -0.0007   | C                                                                                                                                                                                                                          | 3.119862  | 0.760339  | -0.669804 |
|                                                                                                              |           |           |           | C                                                                                                                                                                                                                          | 2.312927  | 3.016092  | 0.292515  |
|                                                                                                              |           |           |           | C                                                                                                                                                                                                                          | 2.508811  | -2.870756 | 2.833869  |
|                                                                                                              |           |           |           | H                                                                                                                                                                                                                          | 3.528972  | -2.992552 | 2.464285  |
|                                                                                                              |           |           |           | H                                                                                                                                                                                                                          | 1.955736  | -3.795678 | 2.638566  |
|                                                                                                              |           |           |           | H                                                                                                                                                                                                                          | 2.502606  | -2.700227 | 3.912915  |
|                                                                                                              |           |           |           | C                                                                                                                                                                                                                          | 3.265491  | -1.483499 | -1.995844 |
|                                                                                                              |           |           |           | C                                                                                                                                                                                                                          | 4.400047  | 0.611456  | 0.070684  |
|                                                                                                              |           |           |           | H                                                                                                                                                                                                                          | 3.746151  | -1.948695 | -1.129301 |
|                                                                                                              |           |           |           | H                                                                                                                                                                                                                          | 2.535339  | -2.197848 | -2.389594 |
|                                                                                                              |           |           |           | H                                                                                                                                                                                                                          | 4.032424  | -1.318265 | -2.765054 |
|                                                                                                              |           |           |           | C                                                                                                                                                                                                                          | -0.14505  | 2.32985   | -1.63606  |
|                                                                                                              |           |           |           | H                                                                                                                                                                                                                          | 0.249521  | -1.371924 | -2.821962 |
|                                                                                                              |           |           |           | H                                                                                                                                                                                                                          | -0.345443 | 0.187115  | -3.413969 |

|    |                                                                                    |           |           |           |    |                                                                                     |           |           |  |
|----|------------------------------------------------------------------------------------|-----------|-----------|-----------|----|-------------------------------------------------------------------------------------|-----------|-----------|--|
|    | H                                                                                  | 1.135304  | -0.504674 | -4.104235 |    |                                                                                     |           |           |  |
|    | H                                                                                  | 0.050749  | 3.089014  | -2.405039 |    |                                                                                     |           |           |  |
|    | H                                                                                  | -1.002611 | 1.732747  | -1.965751 |    |                                                                                     |           |           |  |
|    | H                                                                                  | -0.44878  | 2.849029  | -0.720525 |    |                                                                                     |           |           |  |
|    | H                                                                                  | 2.927256  | 3.764601  | -0.22538  |    |                                                                                     |           |           |  |
|    | H                                                                                  | 1.341438  | 3.474391  | 0.500491  |    |                                                                                     |           |           |  |
|    | H                                                                                  | 2.793029  | 2.804056  | 1.254824  |    |                                                                                     |           |           |  |
|    | H                                                                                  | 5.242768  | 0.520197  | -0.626324 |    |                                                                                     |           |           |  |
|    | H                                                                                  | 4.595182  | 1.468292  | 0.722841  |    |                                                                                     |           |           |  |
|    | H                                                                                  | 4.377787  | -0.294237 | 0.688767  |    |                                                                                     |           |           |  |
|    | C                                                                                  | -3.954279 | -0.95399  | -0.45779  |    |                                                                                     |           |           |  |
|    | C                                                                                  | -5.217188 | -1.563017 | -1.005777 |    |                                                                                     |           |           |  |
|    | C                                                                                  | -5.127021 | 1.135162  | 0.183897  |    |                                                                                     |           |           |  |
|    | H                                                                                  | -4.944324 | 2.12789   | -0.248408 |    |                                                                                     |           |           |  |
|    | H                                                                                  | -5.973514 | 0.702517  | -0.352701 |    |                                                                                     |           |           |  |
|    | H                                                                                  | -5.4453   | 1.29461   | 1.223621  |    |                                                                                     |           |           |  |
|    | H                                                                                  | -6.031973 | -1.527082 | -0.274375 |    |                                                                                     |           |           |  |
|    | H                                                                                  | -5.552488 | -1.039657 | -1.910094 |    |                                                                                     |           |           |  |
|    | H                                                                                  | -5.067347 | -2.612761 | -1.277575 |    |                                                                                     |           |           |  |
|    | <b>J</b>                                                                           |           |           |           |    | <b>K</b>                                                                            |           |           |  |
|    | 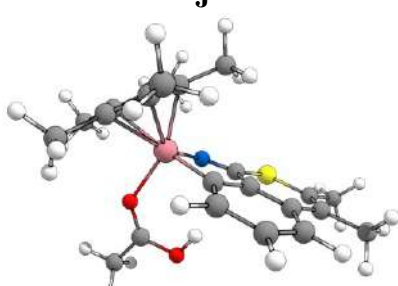 |           |           |           |    |  |           |           |  |
|    | Thermal correction to Gibbs Free Energy=<br>0.367005                               |           |           |           |    | Thermal correction to Gibbs Free Energy=<br>0.311163                                |           |           |  |
|    | E(RM06) = -1642.05993041                                                           |           |           |           |    | E(RM06) = -1412.99266437                                                            |           |           |  |
|    | E(SCRF) = -1642.08651171                                                           |           |           |           |    | E(SCRF) = -1413.02144893                                                            |           |           |  |
| H  | -0.510104                                                                          | 1.938583  | 0.697692  |           | C  | 0.17402                                                                             | 1.13021   | -0.220719 |  |
| O  | -0.276159                                                                          | 2.537674  | 1.444305  |           | C  | 0.207789                                                                            | 2.514722  | -0.301574 |  |
| C  | 0.962669                                                                           | 2.300643  | 1.806271  |           | C  | 1.436225                                                                            | 3.192779  | -0.250734 |  |
| O  | 1.689592                                                                           | 1.45581   | 1.291374  |           | C  | 2.629021                                                                            | 2.503287  | -0.129528 |  |
| Co | 1.262346                                                                           | -0.078968 | 0.036658  |           | C  | 2.651915                                                                            | 1.092113  | -0.087533 |  |
| C  | -0.240423                                                                          | 0.699699  | -0.894237 |           | H  | 3.559362                                                                            | 3.063597  | -0.082063 |  |
| C  | -0.288875                                                                          | 1.652511  | -1.912174 |           | C  | 1.407162                                                                            | 0.452784  | -0.13162  |  |
| C  | -1.467804                                                                          | 0.209288  | -0.39611  |           | H  | 1.454423                                                                            | 4.280482  | -0.302334 |  |
| C  | -1.520319                                                                          | 2.0472    | -2.442079 |           | H  | -0.710791                                                                           | 3.093405  | -0.403774 |  |
| H  | 0.628991                                                                           | 2.094639  | -2.302873 |           | Co | -1.295022                                                                           | -0.116542 | -0.317938 |  |
| C  | -2.710846                                                                          | 1.51399   | -1.965926 |           | C  | 1.167817                                                                            | -0.982386 | -0.219081 |  |
| H  | -1.553286                                                                          | 2.786762  | -3.24099  |           | N  | -0.017483                                                                           | -1.449762 | -0.320791 |  |
| C  | -2.723342                                                                          | 0.585306  | -0.909778 |           | C  | -2.263939                                                                           | -0.242188 | 1.385344  |  |
| H  | -3.646629                                                                          | 1.844957  | -2.408572 |           | C  | -3.254827                                                                           | 0.599133  | -0.50751  |  |
| C  | -3.977477                                                                          | 0.058278  | -0.367075 |           | C  | -2.731198                                                                           | -1.371722 | 0.614169  |  |
| C  | -1.218042                                                                          | -0.624366 | 0.778688  |           | C  | -3.252467                                                                           | -0.853749 | -0.581773 |  |
| N  | -0.043764                                                                          | -0.801588 | 1.226168  |           | C  | -2.457723                                                                           | -2.795161 | 0.93832   |  |

|   |           |           |           |   |           |           |           |
|---|-----------|-----------|-----------|---|-----------|-----------|-----------|
| C | 3.215111  | -0.886703 | 0.364275  | C | -2.709411 | 0.974398  | 0.733373  |
| C | 1.620451  | -1.721122 | -1.059961 | C | -1.556929 | -0.324447 | 2.690773  |
| S | -2.631003 | -1.347002 | 1.625974  | C | -2.615961 | 2.337129  | 1.321914  |
| C | 2.317767  | -1.950118 | 0.182914  | C | -3.74537  | 1.494972  | -1.590838 |
| C | 1.993715  | -3.015812 | 1.163161  | C | -3.657771 | -1.624901 | -1.788325 |
| C | 2.263254  | -0.613967 | -1.729779 | H | -3.376456 | 2.460457  | 2.10444   |
| C | 3.188871  | -0.053411 | -0.824972 | H | -1.636504 | 2.518451  | 1.776884  |
| C | 2.004917  | -0.205586 | -3.136678 | H | -2.786288 | 3.119883  | 0.575324  |
| C | 1.423888  | 3.172196  | 2.926357  | H | -4.842605 | 1.54175   | -1.61123  |
| H | 2.488479  | 3.022179  | 3.107296  | H | -3.36822  | 2.516181  | -1.472146 |
| H | 0.858302  | 2.918079  | 3.828716  | H | -3.418921 | 1.138482  | -2.575371 |
| H | 1.215038  | 4.220966  | 2.696909  | H | -4.742547 | -1.576465 | -1.95267  |
| C | 4.03185   | -0.637132 | 1.585202  | H | -3.176582 | -1.220473 | -2.688041 |
| C | 4.009848  | 1.172509  | -1.022845 | H | -3.366169 | -2.676111 | -1.709114 |
| H | 4.344202  | 0.409651  | 1.649805  | H | -3.135718 | -3.46733  | 0.403006  |
| H | 3.457767  | -0.866039 | 2.490491  | H | -1.422898 | -3.037695 | 0.647899  |
| H | 4.939529  | -1.255154 | 1.59522   | H | -2.573564 | -2.986308 | 2.011058  |
| C | 0.57885   | -2.612609 | -1.639802 | H | -0.874061 | -1.180943 | 2.70501   |
| H | 1.062903  | -2.751384 | 1.688672  | H | -0.960964 | 0.57634   | 2.87268   |
| H | 1.84753   | -3.981    | 0.664618  | H | -2.264475 | -0.437147 | 3.524252  |
| H | 2.789938  | -3.133378 | 1.905451  | S | 2.570417  | -2.079002 | -0.252093 |
| H | 1.027125  | -3.457044 | -2.181637 | C | 3.963197  | -1.004537 | -0.097137 |
| H | -0.066637 | -3.02217  | -0.854409 | C | 3.909405  | 0.348146  | -0.026315 |
| H | -0.063696 | -2.06626  | -2.339147 | C | 5.176426  | 1.147817  | 0.102625  |
| H | 2.528688  | -0.885524 | -3.822054 | H | 5.135354  | 1.815424  | 0.972917  |
| H | 0.938791  | -0.241059 | -3.384075 | H | 6.059994  | 0.517694  | 0.220142  |
| H | 2.363044  | 0.808185  | -3.345373 | H | 5.342215  | 1.782314  | -0.778398 |
| H | 5.069798  | 0.931148  | -1.178313 | C | 5.242636  | -1.797256 | -0.059116 |
| H | 3.669454  | 1.747199  | -1.891131 | H | 5.939753  | -1.474327 | -0.840854 |
| H | 3.945724  | 1.83099   | -0.148355 | H | 5.750275  | -1.690075 | 0.907576  |
| C | -4.022592 | -0.765331 | 0.707958  | H | 5.056584  | -2.865439 | -0.210135 |
| C | -5.302105 | -1.305794 | 1.28988   |   |           |           |           |
| C | -5.247054 | 0.480755  | -1.053348 |   |           |           |           |
| H | -5.22085  | 0.232854  | -2.122835 |   |           |           |           |
| H | -6.13283  | 0.002043  | -0.631725 |   |           |           |           |
| H | -5.399277 | 1.566545  | -0.982966 |   |           |           |           |
| H | -5.969267 | -0.497047 | 1.611075  |   |           |           |           |
| H | -5.846047 | -1.918366 | 0.560809  |   |           |           |           |
| H | -5.108972 | -1.935491 | 2.16409   |   |           |           |           |

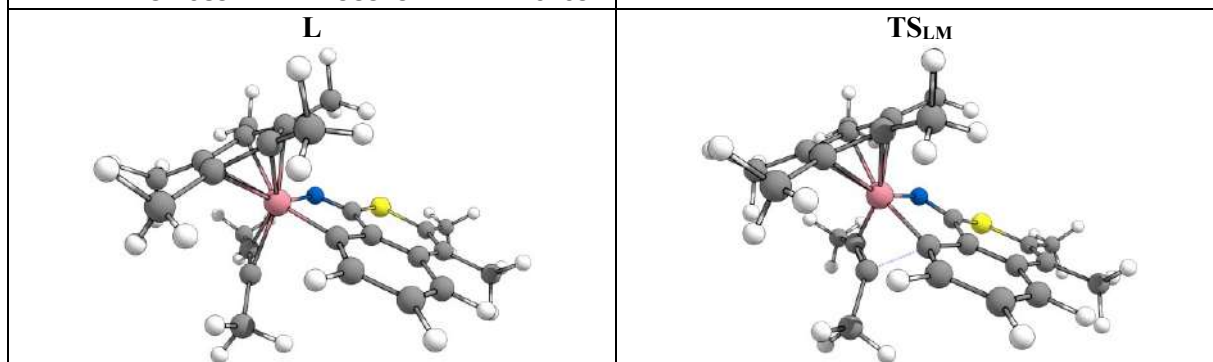

| Thermal correction to Gibbs Free Energy=<br>0.392531<br>E(RM06) = -1568.92470447<br>E(SCRF) = -1568.95033108 |           |           |           | Thermal correction to Gibbs Free Energy=<br>0.395495<br>E(RM06) = -1568.90778299<br>E(SCRF) = -1568.93331360<br>Frequency -261.7897 |           |           |           |
|--------------------------------------------------------------------------------------------------------------|-----------|-----------|-----------|-------------------------------------------------------------------------------------------------------------------------------------|-----------|-----------|-----------|
| C                                                                                                            | -0.310487 | 1.132327  | 0.100108  | C                                                                                                                                   | 0.7569    | 0.547981  | 1.944776  |
| C                                                                                                            | -0.336928 | 2.524653  | 0.087929  | C                                                                                                                                   | -0.250175 | 1.100572  | 0.390646  |
| C                                                                                                            | -1.55791  | 3.199313  | 0.044492  | C                                                                                                                                   | -0.266369 | 2.499663  | 0.287526  |
| C                                                                                                            | -2.760669 | 2.505986  | 0.017142  | C                                                                                                                                   | -1.471901 | 0.408744  | 0.216692  |
| C                                                                                                            | -2.786411 | 1.102067  | 0.037835  | Co                                                                                                                                  | 1.224069  | -0.150755 | 0.066655  |
| H                                                                                                            | -3.689603 | 3.068478  | -0.020437 | C                                                                                                                                   | -1.460417 | 3.164233  | 0.047871  |
| C                                                                                                            | -1.538787 | 0.450252  | 0.083775  | H                                                                                                                                   | 0.653432  | 3.069601  | 0.414698  |
| H                                                                                                            | -1.571522 | 4.288347  | 0.029163  | C                                                                                                                                   | -2.660629 | 2.469829  | -0.07647  |
| H                                                                                                            | 0.586491  | 3.104485  | 0.113448  | H                                                                                                                                   | -1.463741 | 4.249676  | -0.03766  |
| Co                                                                                                           | 1.190216  | -0.093637 | 0.125912  | C                                                                                                                                   | -2.700112 | 1.069471  | 0.005853  |
| C                                                                                                            | -1.314106 | -0.985542 | 0.115114  | H                                                                                                                                   | -3.573946 | 3.032377  | -0.246722 |
| N                                                                                                            | -0.147233 | -1.48284  | 0.148917  | C                                                                                                                                   | -3.96022  | 0.335871  | -0.143406 |
| C                                                                                                            | 1.61423   | -0.545556 | -1.818725 | C                                                                                                                                   | -1.26542  | -1.025694 | 0.167786  |
| C                                                                                                            | 2.976787  | 0.83906   | -0.579582 | N                                                                                                                                   | -0.106537 | -1.541607 | 0.087688  |
| C                                                                                                            | 2.465228  | -1.378465 | -1.005999 | C                                                                                                                                   | 1.74391   | -0.639319 | -1.85706  |
| C                                                                                                            | 3.288764  | -0.52346  | -0.240228 | C                                                                                                                                   | 2.879911  | 0.963612  | -0.652217 |
| C                                                                                                            | 2.390818  | -2.861976 | -0.967177 | C                                                                                                                                   | 1.184927  | -0.659825 | 1.923186  |
| C                                                                                                            | 1.990192  | 0.817956  | -1.603676 | S                                                                                                                                   | -2.701819 | -2.103988 | 0.275105  |
| C                                                                                                            | 0.612403  | -1.0323   | -2.80466  | C                                                                                                                                   | 2.620073  | -1.310836 | -0.921304 |
| C                                                                                                            | 1.508213  | 1.973108  | -2.406834 | C                                                                                                                                   | 1.920216  | 0.758896  | -1.703056 |
| C                                                                                                            | 3.695395  | 2.032141  | -0.050535 | C                                                                                                                                   | 0.828703  | -1.304209 | -2.823148 |
| C                                                                                                            | 4.312363  | -0.908958 | 0.769688  | C                                                                                                                                   | 3.348113  | -0.311109 | -0.218092 |
| H                                                                                                            | 2.074317  | 2.025387  | -3.346807 | C                                                                                                                                   | 3.399477  | 2.267496  | -0.149186 |
| H                                                                                                            | 0.447205  | 1.881068  | -2.660364 | C                                                                                                                                   | 2.706764  | -2.787422 | -0.763818 |
| H                                                                                                            | 1.64355   | 2.927751  | -1.889164 | C                                                                                                                                   | 4.356602  | -0.502072 | 0.861472  |
| H                                                                                                            | 4.616258  | 2.230669  | -0.616628 | H                                                                                                                                   | 3.354955  | -3.067354 | 0.074039  |
| H                                                                                                            | 3.081741  | 2.939427  | -0.105395 | H                                                                                                                                   | 1.706927  | -3.19674  | -0.567392 |
| H                                                                                                            | 3.987917  | 1.889083  | 0.997105  | H                                                                                                                                   | 3.102538  | -3.26684  | -1.668503 |
| H                                                                                                            | 4.417635  | -1.995638 | 0.850498  | C                                                                                                                                   | 1.2256    | 1.805437  | -2.502418 |
| H                                                                                                            | 5.295239  | -0.500747 | 0.501687  | H                                                                                                                                   | 0.518983  | -2.287941 | -2.458309 |
| H                                                                                                            | 4.056449  | -0.518119 | 1.764598  | H                                                                                                                                   | -0.083035 | -0.713323 | -2.972405 |
| H                                                                                                            | 3.124703  | -3.291902 | -0.276813 | H                                                                                                                                   | 1.309922  | -1.433279 | -3.802146 |
| H                                                                                                            | 1.385965  | -3.16573  | -0.640743 | H                                                                                                                                   | 1.69448   | 1.921677  | -3.488398 |
| H                                                                                                            | 2.573327  | -3.293129 | -1.959579 | H                                                                                                                                   | 0.170441  | 1.549431  | -2.659426 |
| H                                                                                                            | 0.159821  | -1.970463 | -2.468086 | H                                                                                                                                   | 1.246491  | 2.780973  | -2.005828 |
| H                                                                                                            | -0.198851 | -0.306938 | -2.934237 | H                                                                                                                                   | 4.414403  | 2.460941  | -0.52295  |
| H                                                                                                            | 1.071171  | -1.202834 | -3.78831  | H                                                                                                                                   | 2.773119  | 3.107652  | -0.467466 |
| S                                                                                                            | -2.734623 | -2.086087 | 0.077447  | H                                                                                                                                   | 3.454222  | 2.284403  | 0.947255  |
| C                                                                                                            | -4.117102 | -0.989204 | 0.016259  | H                                                                                                                                   | 4.558096  | -1.561786 | 1.049553  |
| C                                                                                                            | -4.05151  | 0.362955  | 0.005318  | H                                                                                                                                   | 5.310973  | -0.028785 | 0.596393  |
| C                                                                                                            | -5.313319 | 1.178779  | -0.047745 | H                                                                                                                                   | 4.022291  | -0.049339 | 1.806331  |
| H                                                                                                            | -5.335426 | 1.818479  | -0.940504 | C                                                                                                                                   | -4.051294 | -1.010376 | -0.019383 |
| H                                                                                                            | -6.213276 | 0.561383  | -0.066284 | C                                                                                                                                   | -5.344014 | -1.775484 | -0.124711 |



|                                                                                    |           |           |           |                                                                                     |           |           |           |
|------------------------------------------------------------------------------------|-----------|-----------|-----------|-------------------------------------------------------------------------------------|-----------|-----------|-----------|
| H                                                                                  | -5.391326 | 1.846213  | 0.82104   | C                                                                                   | -5.192011 | 1.150624  | -0.426772 |
| C                                                                                  | -5.406281 | -1.766782 | -0.024084 | H                                                                                   | -5.069317 | 1.751072  | -1.337998 |
| H                                                                                  | -6.038518 | -1.54032  | 0.842948  | H                                                                                   | -6.081016 | 0.532836  | -0.566072 |
| H                                                                                  | -5.9846   | -1.539211 | -0.92771  | H                                                                                   | -5.407215 | 1.853275  | 0.38993   |
| H                                                                                  | -5.222373 | -2.845927 | -0.019214 | H                                                                                   | -6.089349 | -1.406028 | 0.589051  |
| C                                                                                  | 1.38244   | -0.700245 | 2.121943  | H                                                                                   | -5.775308 | -1.697066 | -1.130444 |
| C                                                                                  | 1.321297  | 0.538871  | 2.129694  | H                                                                                   | -5.1948   | -2.840457 | 0.080202  |
| C                                                                                  | 1.323641  | 1.898871  | 2.673336  | C                                                                                   | 1.587733  | -1.901172 | 2.588853  |
| H                                                                                  | 2.03953   | 2.5447    | 2.150245  | C                                                                                   | 0.738464  | 1.710492  | 2.870114  |
| H                                                                                  | 0.336221  | 2.362333  | 2.576314  | H                                                                                   | 1.456921  | 2.480782  | 2.560736  |
| H                                                                                  | 1.598511  | 1.874485  | 3.733911  | H                                                                                   | -0.247621 | 2.185084  | 2.926249  |
| C                                                                                  | 1.487334  | -2.109448 | 2.488852  | H                                                                                   | 1.030894  | 1.369647  | 3.869988  |
| H                                                                                  | 1.348555  | -2.233226 | 3.569092  | H                                                                                   | 1.401676  | -1.856446 | 3.669195  |
| H                                                                                  | 0.724495  | -2.684606 | 1.95396   | H                                                                                   | 1.026416  | -2.74447  | 2.169433  |
| H                                                                                  | 2.471596  | -2.514465 | 2.221634  | H                                                                                   | 2.654177  | -2.106538 | 2.431073  |
| <b>M</b>                                                                           |           |           |           | <b>TS<sub>MN</sub></b>                                                              |           |           |           |
| 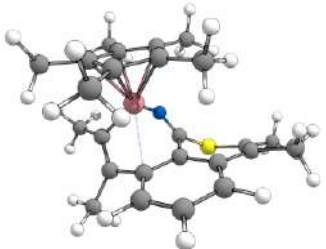 |           |           |           |  |           |           |           |
| Thermal correction to Gibbs Free Energy=<br>0.392920                               |           |           |           | Thermal correction to Gibbs Free Energy=<br>0.394213                                |           |           |           |
| E(RM06) = -1568.93693454                                                           |           |           |           | E(RM06) = -1568.92600824                                                            |           |           |           |
| E(SCRF) = -1568.96273468                                                           |           |           |           | E(SCRF) = -1568.95171465                                                            |           |           |           |
| Frequency -135.7552                                                                |           |           |           |                                                                                     |           |           |           |
| C                                                                                  | 0.934793  | 2.08111   | 1.230443  | C                                                                                   | -1.365244 | 0.020283  | -1.845101 |
| C                                                                                  | -0.103994 | 1.893965  | 0.171389  | N                                                                                   | 0.032072  | -1.335278 | -0.856101 |
| C                                                                                  | -0.155926 | 2.78662   | -0.914499 | C                                                                                   | -0.737318 | 1.226986  | -1.751752 |
| C                                                                                  | -1.113991 | 0.895074  | 0.264277  | C                                                                                   | 0.356911  | 1.532347  | -0.794965 |
| Co                                                                                 | 1.084223  | -0.232999 | 0.149554  | C                                                                                   | -1.257076 | 2.384823  | -2.568986 |
| C                                                                                  | -1.1548   | 2.69789   | -1.866398 | C                                                                                   | 0.491583  | 2.855904  | -0.330248 |
| H                                                                                  | 0.613411  | 3.553515  | -0.994661 | C                                                                                   | 1.414998  | 0.620448  | -0.503335 |
| C                                                                                  | -2.160254 | 1.739905  | -1.745593 | Co                                                                                  | -1.310129 | -0.203762 | -0.058948 |
| H                                                                                  | -1.173094 | 3.392599  | -2.703766 | C                                                                                   | 1.616819  | 3.249692  | 0.375507  |
| C                                                                                  | -2.180794 | 0.84305   | -0.674257 | H                                                                                   | -0.295821 | 3.579892  | -0.526595 |
| H                                                                                  | -2.959336 | 1.715305  | -2.482436 | C                                                                                   | 2.594583  | 1.03953   | 0.154011  |
| C                                                                                  | -3.313034 | -0.071995 | -0.497482 | C                                                                                   | 1.173069  | -0.775399 | -0.83167  |
| C                                                                                  | -1.061077 | -0.147248 | 1.320179  | C                                                                                   | -2.595917 | 0.611139  | 1.318339  |
| N                                                                                  | -0.026001 | -0.815339 | 1.571078  | C                                                                                   | -2.457066 | -1.611203 | 0.807319  |
| C                                                                                  | 1.128549  | -2.153241 | -0.734094 | C                                                                                   | 2.661843  | 2.366451  | 0.60811   |
| C                                                                                  | 2.036314  | -0.27204  | -1.731038 | H                                                                                   | 1.690721  | 4.273707  | 0.736833  |
| C                                                                                  | 1.691522  | 1.00286   | 1.457145  | H                                                                                   | 3.540192  | 2.716612  | 1.141269  |
| S                                                                                  | -2.642657 | -0.458943 | 2.159936  | C                                                                                   | 3.728531  | 0.136208  | 0.364945  |
| C                                                                                  | 2.328986  | -1.765146 | -0.011603 | C                                                                                   | 3.852684  | -1.055836 | -0.269714 |
| C                                                                                  | 0.933985  | -1.218601 | -1.759447 | C                                                                                   | 4.831688  | 0.616113  | 1.268784  |

|   |           |           |           |                                                                                      |           |           |           |
|---|-----------|-----------|-----------|--------------------------------------------------------------------------------------|-----------|-----------|-----------|
| C | 0.208321  | -3.248688 | -0.325352 | S                                                                                    | 2.609446  | -1.772763 | -1.283808 |
| C | 2.935502  | -0.659344 | -0.717863 | C                                                                                    | -1.351356 | -1.280843 | 1.704193  |
| C | 2.209998  | 0.870688  | -2.669867 | C                                                                                    | -1.450202 | 0.082387  | 2.029277  |
| C | 2.87693   | -2.498246 | 1.160363  | C                                                                                    | -0.277136 | -2.229519 | 2.107336  |
| C | 4.238106  | 0.002712  | -0.426915 | C                                                                                    | -3.276772 | -0.449862 | 0.660196  |
| H | 3.674336  | -1.933869 | 1.655213  | C                                                                                    | -2.998019 | 2.046433  | 1.318711  |
| H | 2.087616  | -2.670893 | 1.901692  | C                                                                                    | -2.168604 | -0.6182   | -2.90111  |
| H | 3.286799  | -3.474057 | 0.866861  | C                                                                                    | -2.670708 | -2.956226 | 0.208745  |
| C | -0.205239 | -1.146547 | -2.713964 | C                                                                                    | -0.497015 | 0.904375  | 2.82654   |
| H | 0.170734  | -3.334761 | 0.765596  | H                                                                                    | -0.069459 | -2.944126 | 1.303818  |
| H | -0.817092 | -3.052018 | -0.661083 | H                                                                                    | 0.662775  | -1.704164 | 2.317472  |
| H | 0.523972  | -4.216375 | -0.73653  | H                                                                                    | -0.558267 | -2.796061 | 3.004924  |
| H | 0.095578  | -1.489226 | -3.713306 | C                                                                                    | -4.524614 | -0.31367  | -0.14286  |
| H | -1.045295 | -1.76779  | -2.384895 | H                                                                                    | -3.598414 | 2.296382  | 2.204217  |
| H | -0.57645  | -0.118353 | -2.817126 | H                                                                                    | -2.118319 | 2.701646  | 1.327485  |
| H | 2.6747    | 0.548155  | -3.611984 | H                                                                                    | -3.595656 | 2.298793  | 0.434079  |
| H | 1.247532  | 1.335015  | -2.916778 | H                                                                                    | -3.496674 | -2.951785 | -0.511232 |
| H | 2.847129  | 1.648797  | -2.232794 | H                                                                                    | -1.765231 | -3.279368 | -0.320108 |
| H | 4.716994  | -0.417035 | 0.463409  | H                                                                                    | -2.900072 | -3.708243 | 0.975492  |
| H | 4.934538  | -0.129808 | -1.264731 | H                                                                                    | -4.680888 | -1.179343 | -0.796294 |
| H | 4.115112  | 1.081335  | -0.26456  | H                                                                                    | -5.412733 | -0.224095 | 0.496479  |
| C | -3.640325 | -0.600978 | 0.709456  | H                                                                                    | -4.492724 | 0.579509  | -0.781767 |
| C | -4.898903 | -1.374359 | 0.97693   | H                                                                                    | -0.949035 | 1.251574  | 3.765735  |
| C | -4.201035 | -0.309106 | -1.691373 | H                                                                                    | 0.403791  | 0.336606  | 3.081679  |
| H | -3.608015 | -0.440883 | -2.604695 | H                                                                                    | -0.174387 | 1.79504   | 2.268739  |
| H | -4.808151 | -1.210007 | -1.574768 | C                                                                                    | 5.071001  | -1.933845 | -0.182388 |
| H | -4.889685 | 0.5287    | -1.875526 | H                                                                                    | 5.993946  | -1.365419 | -0.3401   |
| H | -5.740846 | -1.019673 | 0.374779  | H                                                                                    | 5.140899  | -2.425024 | 0.797026  |
| H | -4.756025 | -2.444044 | 0.772599  | H                                                                                    | 5.039708  | -2.727397 | -0.936157 |
| H | -5.185982 | -1.291523 | 2.031192  | H                                                                                    | 4.428406  | 0.981545  | 2.221569  |
| C | 2.682673  | 0.766946  | 2.533013  | H                                                                                    | 5.545693  | -0.175993 | 1.503792  |
| C | 0.978504  | 3.413316  | 1.924823  | H                                                                                    | 5.396942  | 1.446616  | 0.822323  |
| H | 1.17554   | 4.236209  | 1.223827  | H                                                                                    | -2.012515 | -0.180664 | -3.896249 |
| H | 0.020156  | 3.637281  | 2.41373   | H                                                                                    | -1.884995 | -1.678155 | -2.943212 |
| H | 1.763082  | 3.439145  | 2.688036  | H                                                                                    | -3.240401 | -0.585808 | -2.662498 |
| H | 2.766739  | 1.616667  | 3.225222  | H                                                                                    | -1.947067 | 3.013213  | -1.987362 |
| H | 2.382687  | -0.113706 | 3.117667  | H                                                                                    | -0.43915  | 3.029872  | -2.914138 |
| H | 3.684963  | 0.561141  | 2.135708  | H                                                                                    | -1.813399 | 2.026273  | -3.441294 |
| N |           |           |           | O                                                                                    |           |           |           |
|   |           |           |           |  |           |           |           |
|   |           |           |           | Thermal correction to Gibbs Free Energy=                                             |           |           |           |

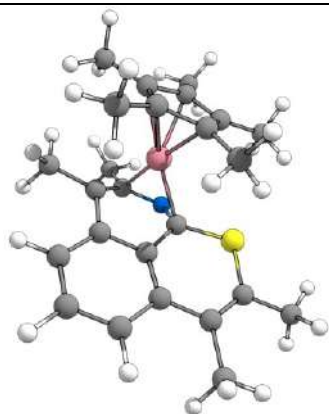

Thermal correction to Gibbs Free Energy=  
0.402170

E(RM06) = -1569.00698176  
E(SCRF) = -1569.03058325

0.201764  
E(RM06) = -1033.24426264  
E(SCRF) = -1033.26316370

|    |           |           |           |   |           |           |           |
|----|-----------|-----------|-----------|---|-----------|-----------|-----------|
| C  | -1.015251 | 0.83156   | -1.834228 | C | 1.453905  | 2.411831  | 0.000021  |
| N  | -0.209471 | -0.276278 | -1.875294 | C | 0.286007  | 3.130383  | 0.000037  |
| C  | -0.777775 | 1.798698  | -0.797849 | C | -0.960439 | 2.493756  | 0.000025  |
| C  | 0.609686  | 2.023336  | -0.358869 | C | -1.063938 | 1.108883  | 0.000007  |
| C  | -1.729061 | 2.948709  | -0.634589 | C | 0.151955  | 0.349886  | 0.000008  |
| C  | 1.101899  | 3.234683  | 0.114708  | C | 1.429857  | 0.996158  | 0.000004  |
| C  | 1.447995  | 0.894491  | -0.398331 | C | -2.38483  | 0.478273  | -0.00002  |
| Co | -1.138096 | -0.128627 | -0.142326 | C | -2.572615 | -0.861564 | -0.000001 |
| C  | 2.419617  | 3.306133  | 0.566317  | S | -1.284266 | -2.047371 | 0.000007  |
| H  | 0.466159  | 4.116263  | 0.147983  | C | 0.184021  | -1.067498 | 0.000009  |
| C  | 2.779589  | 0.952324  | 0.042069  | C | -3.578732 | 1.392006  | -0.000007 |
| C  | 0.753465  | -0.299986 | -0.887853 | C | -3.91995  | -1.531771 | -0.000029 |
| C  | -1.835974 | 0.101736  | 1.76361   | N | 1.271145  | -1.796979 | -0.000013 |
| C  | -2.853524 | -1.370153 | 0.272089  | C | 2.475292  | -1.178569 | -0.000003 |
| C  | 3.238917  | 2.192006  | 0.532142  | C | 2.615559  | 0.196944  | -0.000016 |
| H  | 2.806131  | 4.244542  | 0.958279  | C | 3.632794  | -2.130861 | -0.000004 |
| H  | 4.255361  | 2.280833  | 0.904104  | C | 3.989995  | 0.807673  | -0.000011 |
| C  | 3.669819  | -0.212881 | 0.024802  | H | 2.400482  | 2.944029  | 0.000025  |
| C  | 3.253757  | -1.445338 | -0.341021 | H | 0.324631  | 4.21872   | 0.000056  |
| C  | 5.098178  | 0.003811  | 0.440053  | H | -1.853774 | 3.110934  | 0.000003  |
| S  | 1.626081  | -1.85853  | -0.872637 | H | -4.524713 | 0.845054  | -0.000107 |
| C  | -1.635631 | -1.950042 | 0.727011  | H | -3.58145  | 2.046826  | 0.883109  |
| C  | -1.029844 | -1.061643 | 1.693487  | H | -3.581376 | 2.046833  | -0.883242 |
| C  | -1.156002 | -3.304965 | 0.329475  | H | -3.824724 | -2.623881 | -0.000046 |
| C  | -2.960615 | -0.084951 | 0.863125  | H | -4.505665 | -1.257059 | 0.88671   |
| C  | -1.563081 | 1.293086  | 2.618879  | H | -4.505635 | -1.257032 | -0.886779 |
| C  | -2.104409 | 0.905121  | -2.854452 | H | 4.608595  | -1.637542 | -0.000215 |
| C  | -3.763291 | -1.980323 | -0.738262 | H | 3.574641  | -2.785946 | 0.878768  |
| C  | 0.240837  | -1.288881 | 2.436926  | H | 3.574431  | -2.786168 | -0.878667 |
| H  | -1.123493 | -3.413033 | -0.762845 | H | 3.977081  | 1.899903  | -0.000005 |
| H  | -0.150327 | -3.511053 | 0.706904  | H | 4.567217  | 0.499457  | 0.882252  |
| H  | -1.828523 | -4.082298 | 0.717461  | H | 4.567216  | 0.499472  | -0.882281 |
| C  | -4.105302 | 0.855122  | 0.690937  |   |           |           |           |
| H  | -1.770252 | 1.087956  | 3.677641  |   |           |           |           |

|                                                                                                                                                                                                                            |           |           |           |
|----------------------------------------------------------------------------------------------------------------------------------------------------------------------------------------------------------------------------|-----------|-----------|-----------|
| H                                                                                                                                                                                                                          | -0.513995 | 1.609692  | 2.538986  |
| H                                                                                                                                                                                                                          | -2.181567 | 2.14886   | 2.326237  |
| H                                                                                                                                                                                                                          | -4.488797 | -1.255    | -1.122493 |
| H                                                                                                                                                                                                                          | -3.197991 | -2.367202 | -1.5964   |
| H                                                                                                                                                                                                                          | -4.331847 | -2.82203  | -0.318643 |
| H                                                                                                                                                                                                                          | -4.455288 | 0.891189  | -0.348688 |
| H                                                                                                                                                                                                                          | -4.959806 | 0.545636  | 1.307653  |
| H                                                                                                                                                                                                                          | -3.847662 | 1.876756  | 0.988118  |
| H                                                                                                                                                                                                                          | 0.067847  | -1.803682 | 3.391603  |
| H                                                                                                                                                                                                                          | 0.943862  | -1.896173 | 1.853111  |
| H                                                                                                                                                                                                                          | 0.740645  | -0.337107 | 2.656068  |
| C                                                                                                                                                                                                                          | 4.131173  | -2.66827  | -0.356379 |
| H                                                                                                                                                                                                                          | 4.931698  | -2.57528  | -1.100433 |
| H                                                                                                                                                                                                                          | 4.597843  | -2.84166  | 0.620001  |
| H                                                                                                                                                                                                                          | 3.559603  | -3.567727 | -0.608558 |
| H                                                                                                                                                                                                                          | 5.171894  | 0.310708  | 1.492453  |
| H                                                                                                                                                                                                                          | 5.707706  | -0.893756 | 0.32022   |
| H                                                                                                                                                                                                                          | 5.567478  | 0.79725   | -0.156075 |
| H                                                                                                                                                                                                                          | -1.830975 | 1.586437  | -3.671062 |
| H                                                                                                                                                                                                                          | -2.272636 | -0.090005 | -3.2776   |
| H                                                                                                                                                                                                                          | -3.045225 | 1.270421  | -2.42919  |
| H                                                                                                                                                                                                                          | -1.722449 | 3.320341  | 0.398272  |
| H                                                                                                                                                                                                                          | -1.449827 | 3.793998  | -1.282065 |
| H                                                                                                                                                                                                                          | -2.758992 | 2.6782    | -0.881766 |
| 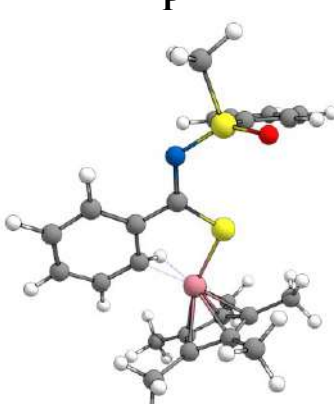 <p><b>P</b></p> <p>Thermal correction to Gibbs Free Energy=<br/>0.366716<br/>E(RM06) = -2003.00239782<br/>E(SCRF) = -2003.03638881</p> |           |           |           |
| H                                                                                                                                                                                                                          | -1.229361 | 0.490015  | -1.416961 |
| C                                                                                                                                                                                                                          | -1.351193 | 1.472449  | -0.731329 |
| C                                                                                                                                                                                                                          | -2.35609  | 2.349453  | -1.228122 |
| C                                                                                                                                                                                                                          | -2.186302 | 3.714552  | -1.24105  |
| C                                                                                                                                                                                                                          | -0.968757 | 4.2926    | -0.823692 |
| C                                                                                                                                                                                                                          | 0.054171  | 3.482008  | -0.391987 |
| H                                                                                                                                                                                                                          | -0.839715 | 5.371906  | -0.855177 |
| C                                                                                                                                                                                                                          | -0.116252 | 2.082525  | -0.319806 |
| H                                                                                                                                                                                                                          | -2.991779 | 4.355123  | -1.596091 |

|    |           |           |           |
|----|-----------|-----------|-----------|
| H  | -3.278377 | 1.922559  | -1.61799  |
| Co | -1.676986 | -0.351834 | -0.096816 |
| C  | 0.889466  | 1.228178  | 0.212505  |
| C  | -2.645315 | -1.113089 | 1.529574  |
| C  | -3.603347 | -0.881824 | -0.546357 |
| C  | -2.184228 | -2.200834 | 0.68373   |
| C  | -2.8052   | -2.075723 | -0.579753 |
| C  | -1.242148 | -3.273945 | 1.11118   |
| C  | -3.5636   | -0.330058 | 0.778997  |
| C  | -2.261005 | -0.910524 | 2.955227  |
| C  | -4.309669 | 0.87143   | 1.24526   |
| C  | -4.463931 | -0.413676 | -1.672651 |
| C  | -2.652142 | -2.9693   | -1.762256 |
| H  | -5.38484  | 0.666784  | 1.340046  |
| H  | -3.949689 | 1.206291  | 2.223468  |
| H  | -4.191354 | 1.716364  | 0.553547  |
| H  | -5.233893 | -1.159552 | -1.912758 |
| H  | -4.983154 | 0.517983  | -1.422391 |
| H  | -3.885814 | -0.240454 | -2.590492 |
| H  | -3.482148 | -3.687072 | -1.835853 |
| H  | -2.6358   | -2.395221 | -2.69611  |
| H  | -1.72195  | -3.545823 | -1.717114 |
| H  | -0.747718 | -3.739633 | 0.25118   |
| H  | -0.454417 | -2.882442 | 1.765448  |
| H  | -1.764667 | -4.065335 | 1.665434  |
| H  | -1.233083 | -1.237521 | 3.144029  |
| H  | -2.316534 | 0.146381  | 3.238026  |
| H  | -2.918412 | -1.474598 | 3.631786  |
| S  | 0.424483  | -0.38537  | 0.512552  |
| H  | 1.003792  | 3.900235  | -0.065135 |
| N  | 2.146446  | 1.757114  | 0.418029  |
| S  | 3.308699  | 0.871684  | 0.978736  |
| O  | 3.30928   | 0.281388  | 2.322998  |
| H  | 4.78386   | 2.335737  | -0.179425 |
| C  | 4.67666   | 2.00277   | 0.854711  |
| H  | 4.443861  | 2.846873  | 1.508102  |
| H  | 5.569121  | 1.476322  | 1.201632  |
| C  | 3.742048  | -0.417483 | -0.191274 |
| C  | 4.204463  | -1.631667 | 0.29996   |
| H  | 4.263829  | -1.785241 | 1.374619  |
| C  | 4.554711  | -2.626958 | -0.60636  |
| H  | 4.91472   | -3.586064 | -0.242643 |
| C  | 4.43529   | -2.397987 | -1.973867 |
| H  | 4.705944  | -3.181125 | -2.678018 |
| H  | 3.861537  | -1.008067 | -3.517649 |
| C  | 3.963693  | -1.1759   | -2.448589 |
| C  | 3.610458  | -0.172928 | -1.555015 |
| H  | 3.213691  | 0.778739  | -1.904494 |

The coordinates of all computed species are provided in Table S4 and in a separate file that allow direct visualization: *DFT.xyz*.

## References

1. B. Sun, T. Yoshino, S. Matsunaga and M. Kanai, *Adv. Synth. Catal.*, 2014, **356**, 1491-1495
2. (a) M. R. Yadav, R. K. Rit and A. K. Sahoo, *Chem. Eur. J.*, 2012, **18**, 5541-5545; (b) M. Shankar, K. Ghosh, K. Mukherjee, R. K. Rit and A. K. Sahoo, *Org. Lett.*, 2018, **20**, 5144; (c) M. Shankar, R. K. Rit, S. Sau, K. Mukherjee, V. Gandon and A. K. Sahoo, *Chem. Sci.*, 2020, **11**, 10770.
3. (a) M. J. Mio, L. C. Kopel, J. B. Braun, T. L. Gadzikwa, K. L. Hull, R. G. Brisbois, C. J. Markworth and P. A. Grieco, *Org. Lett.*, **2002**, **4**, 3199-3202; (b) S. Dutta, R. K. Mallick, R. Prasad, V. Gandon and A. K. Sahoo, *Angew. Chem., Int. Ed.*, 2019, **58**, 2289.
4. (a) T. Ozturk, E. Ertas and O. Mert, *Chem. Rev.*, 2007, **107**, 5210–5278; (b) K. Vogerl, N. Ong, J. Senger, D. Herp, K. Schmidtkunz, M. Marek, M. Muller, K. Bartel, T. B. Shaik, N. J. Porter, D. Robaa, D. W. Christianson, C. Romier, W. Sippl, M. Jung and F. Bracher, *J. Med. Chem.*, 2019, **62**, 1138–1166; (c) J.Z. Liu, S.E. Zhang, F. Nie, Y. Yang, Y.B. Tang, W. Yin, J.Y. Tian, F. Ye and Z. Xiao, *Bioorg. Med. Chem. Lett.*, 2013, **23**, 6217-6222.
5. Bruker SMART V5.630 and SAINT-PLUS V6.45, Bruker-Nonius Analytical X-ray Systems Inc.: Madison, Wisconsin, USA 2003. SADABS, Empirical absorption correction program, Bruker AXS Inc., Madison, Wisconsin, USA, 1997.
6. G M, Sheldrick *Acta Crystallogr* 64A, **112**, 2008.
7. M. J. Frisch, *Gaussian 09*, revision D.01; Gaussian, Inc.: Wallingford, CT, 2013.
8. Y. Zhao and D. G. Truhlar, *J. Chem. Phys.*, 2006, **125**, 194101.
9. A. D. MacLean and Chandler, G. S. *J. Chem. Phys.*, 1980, **72**, 5639
10. T. H. Jr. Dunning and P. J. Hay, *Modern Theoretical Chemistry*; Schaeffer, H. F., III, Ed.; Plenum: New York, vol. **3**, 1997.
11. D. Andrae, U. Häußermann, M. Dolg, H. Stoll and H. Preuß, *Theor. Chim. Acta*, 1990, **77**, 123–141.
12. A. V. Marenich, C. J. Cramer and D. G. Truhlar, *J. Phys. Chem. B*. 2009, **113**, 6378–6396.

13. V. Gandon, N. Agenet, K. P. C. Vollhardt, M. Malacria and C. Aubert, *J. Am. Chem. Soc.* 2006, **128**, 8509–8520
14. There is no spontaneous elimination of PhSOMe when the Cp\*Co<sup>2+</sup> moiety is removed, nor when **G** or its free ligand are protonated.
15. V. S. Thirunavukkarasu and M. Donati and L. Ackermann, *Org. Lett.*, 2012, **14**, 3416–3419.

MJ-5-14

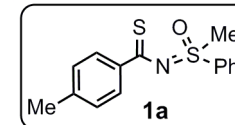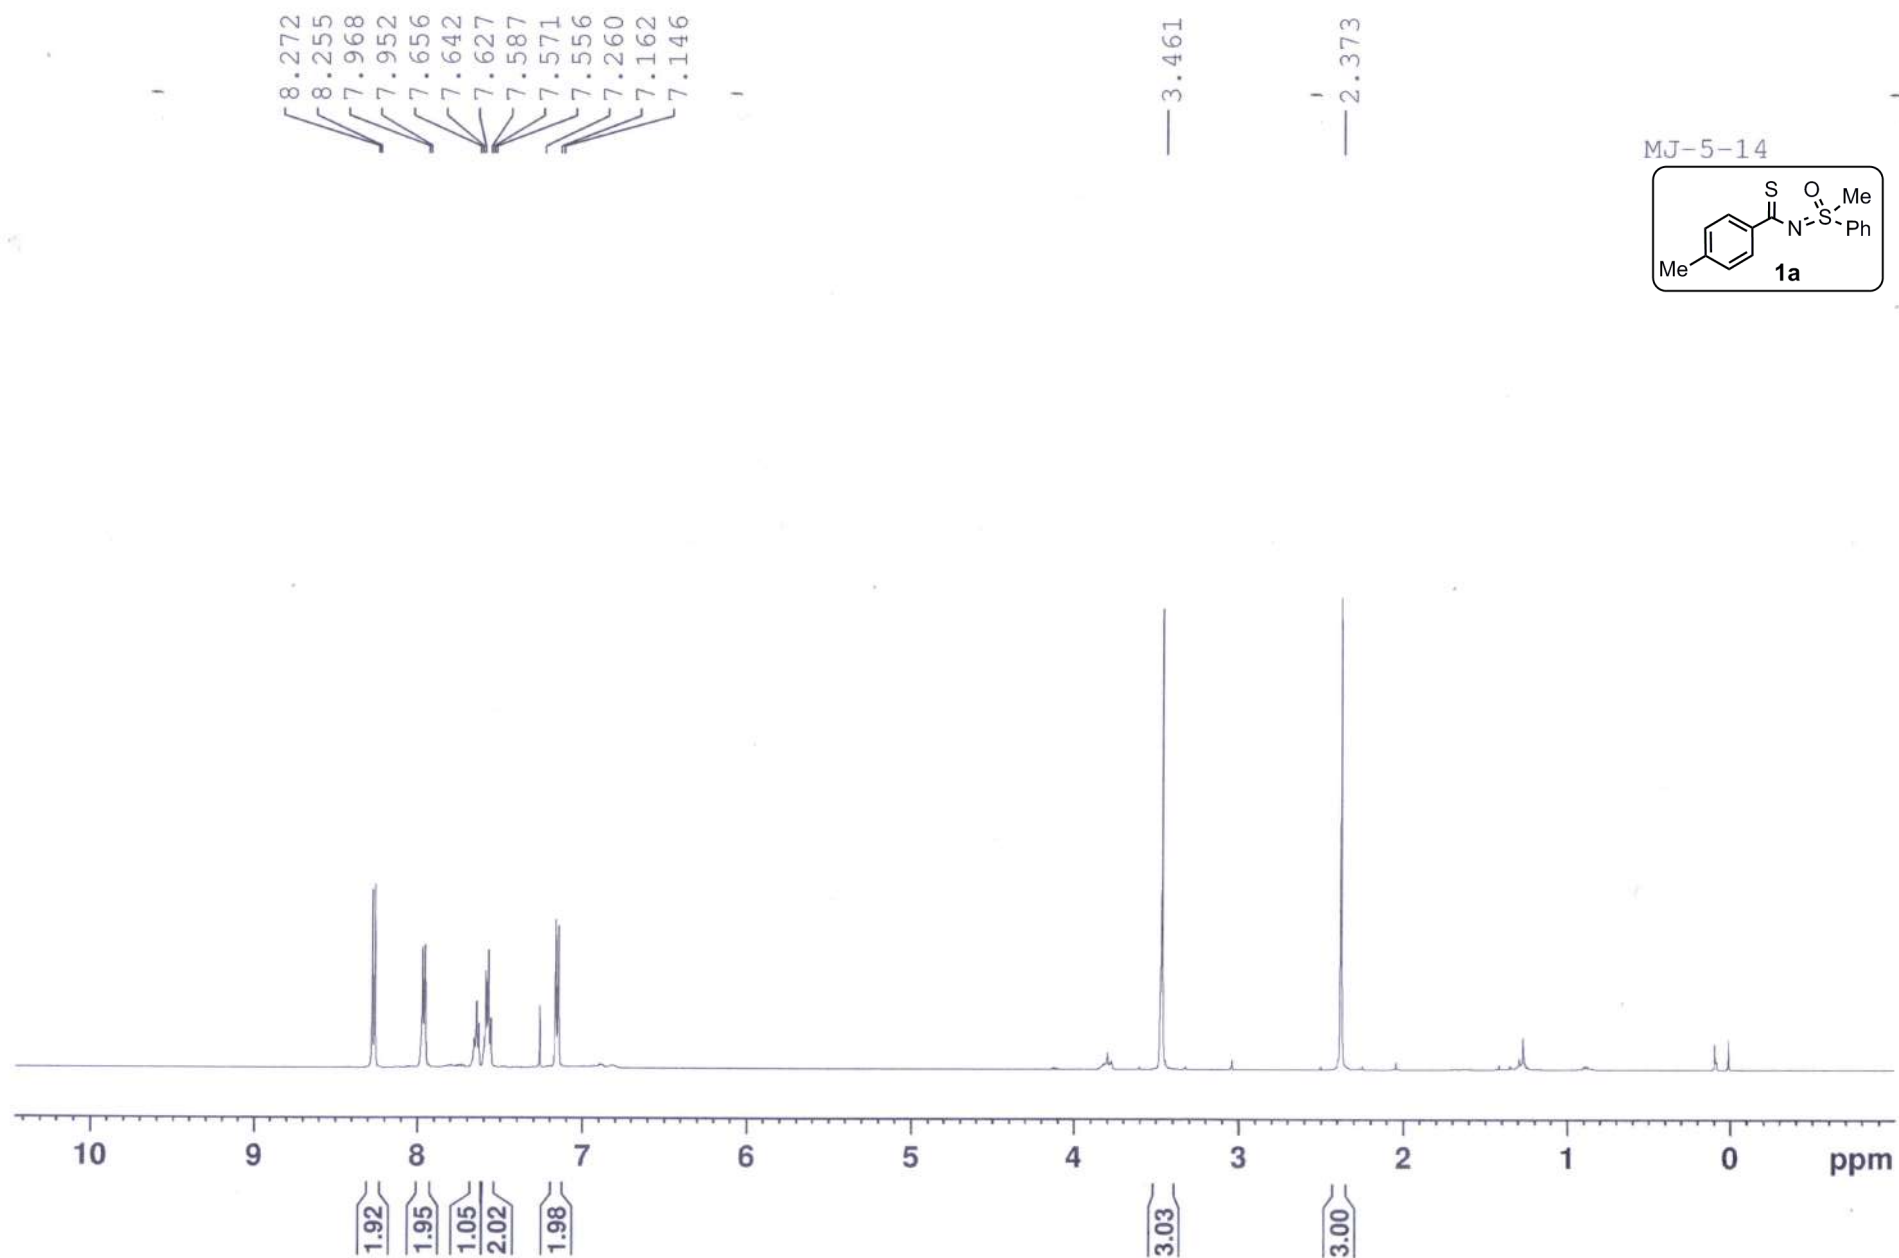



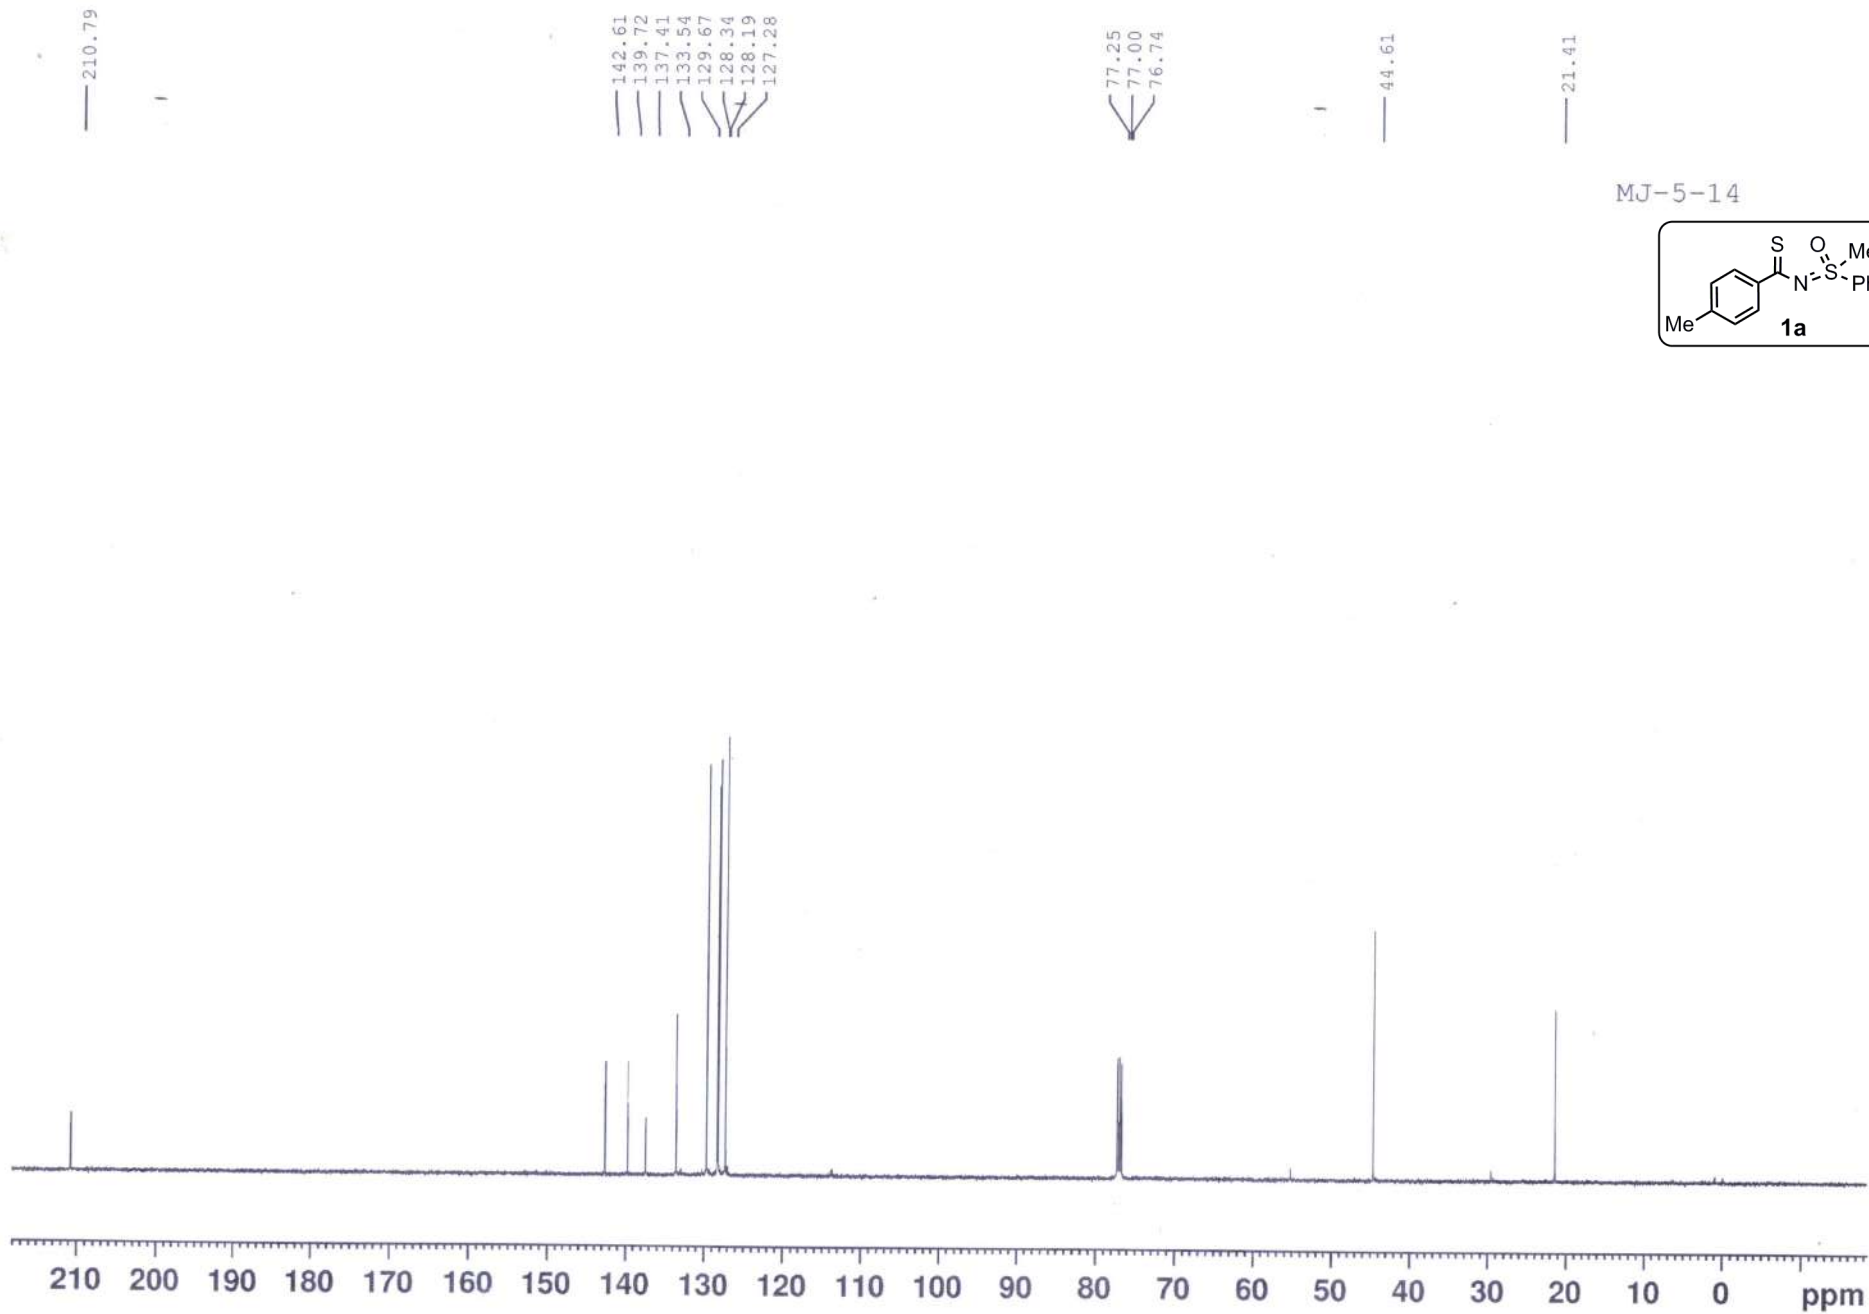

MJ-5-14

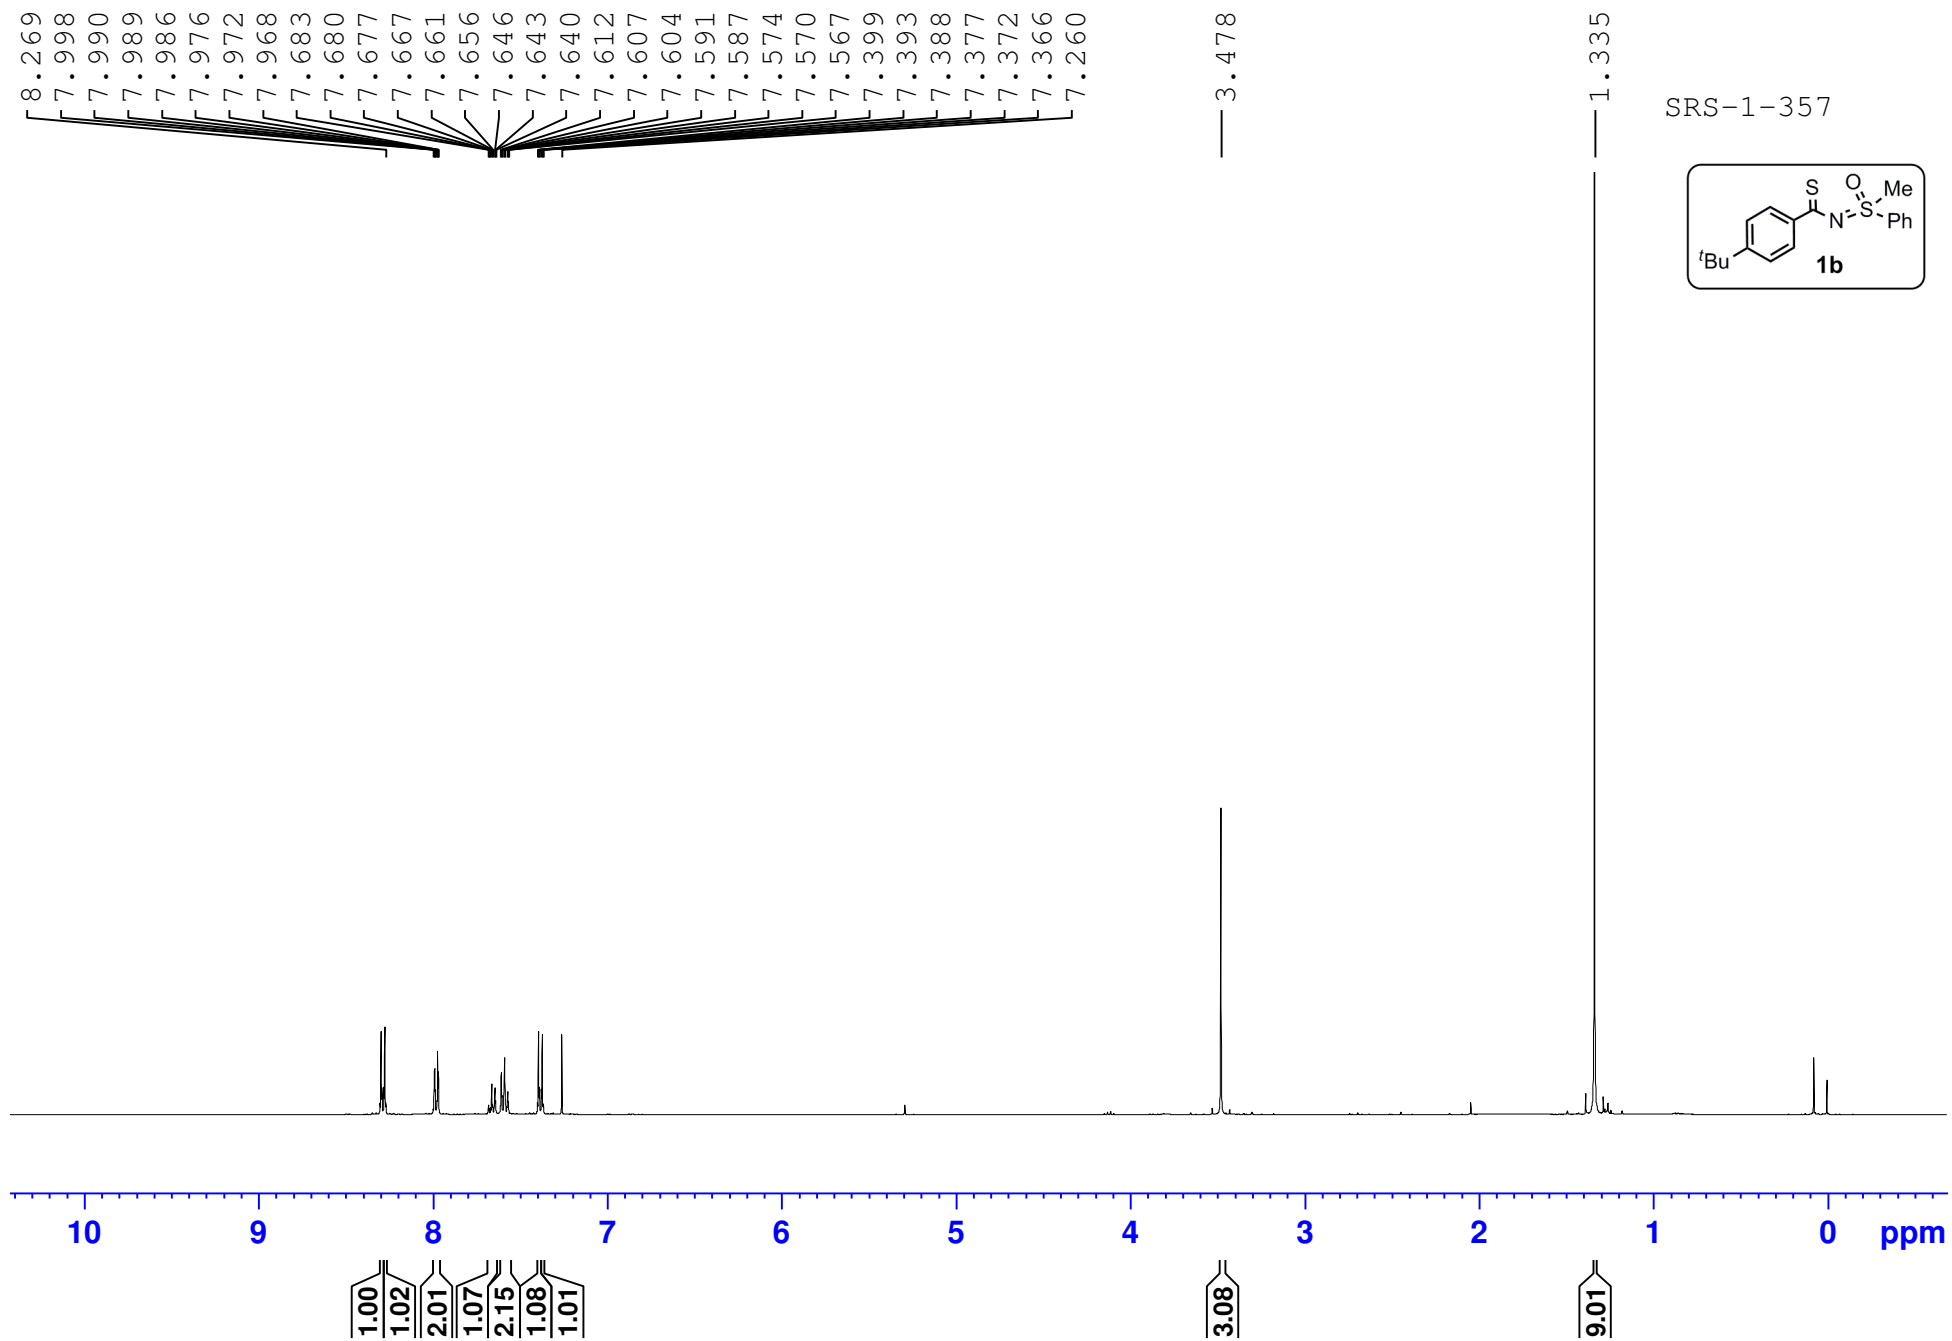

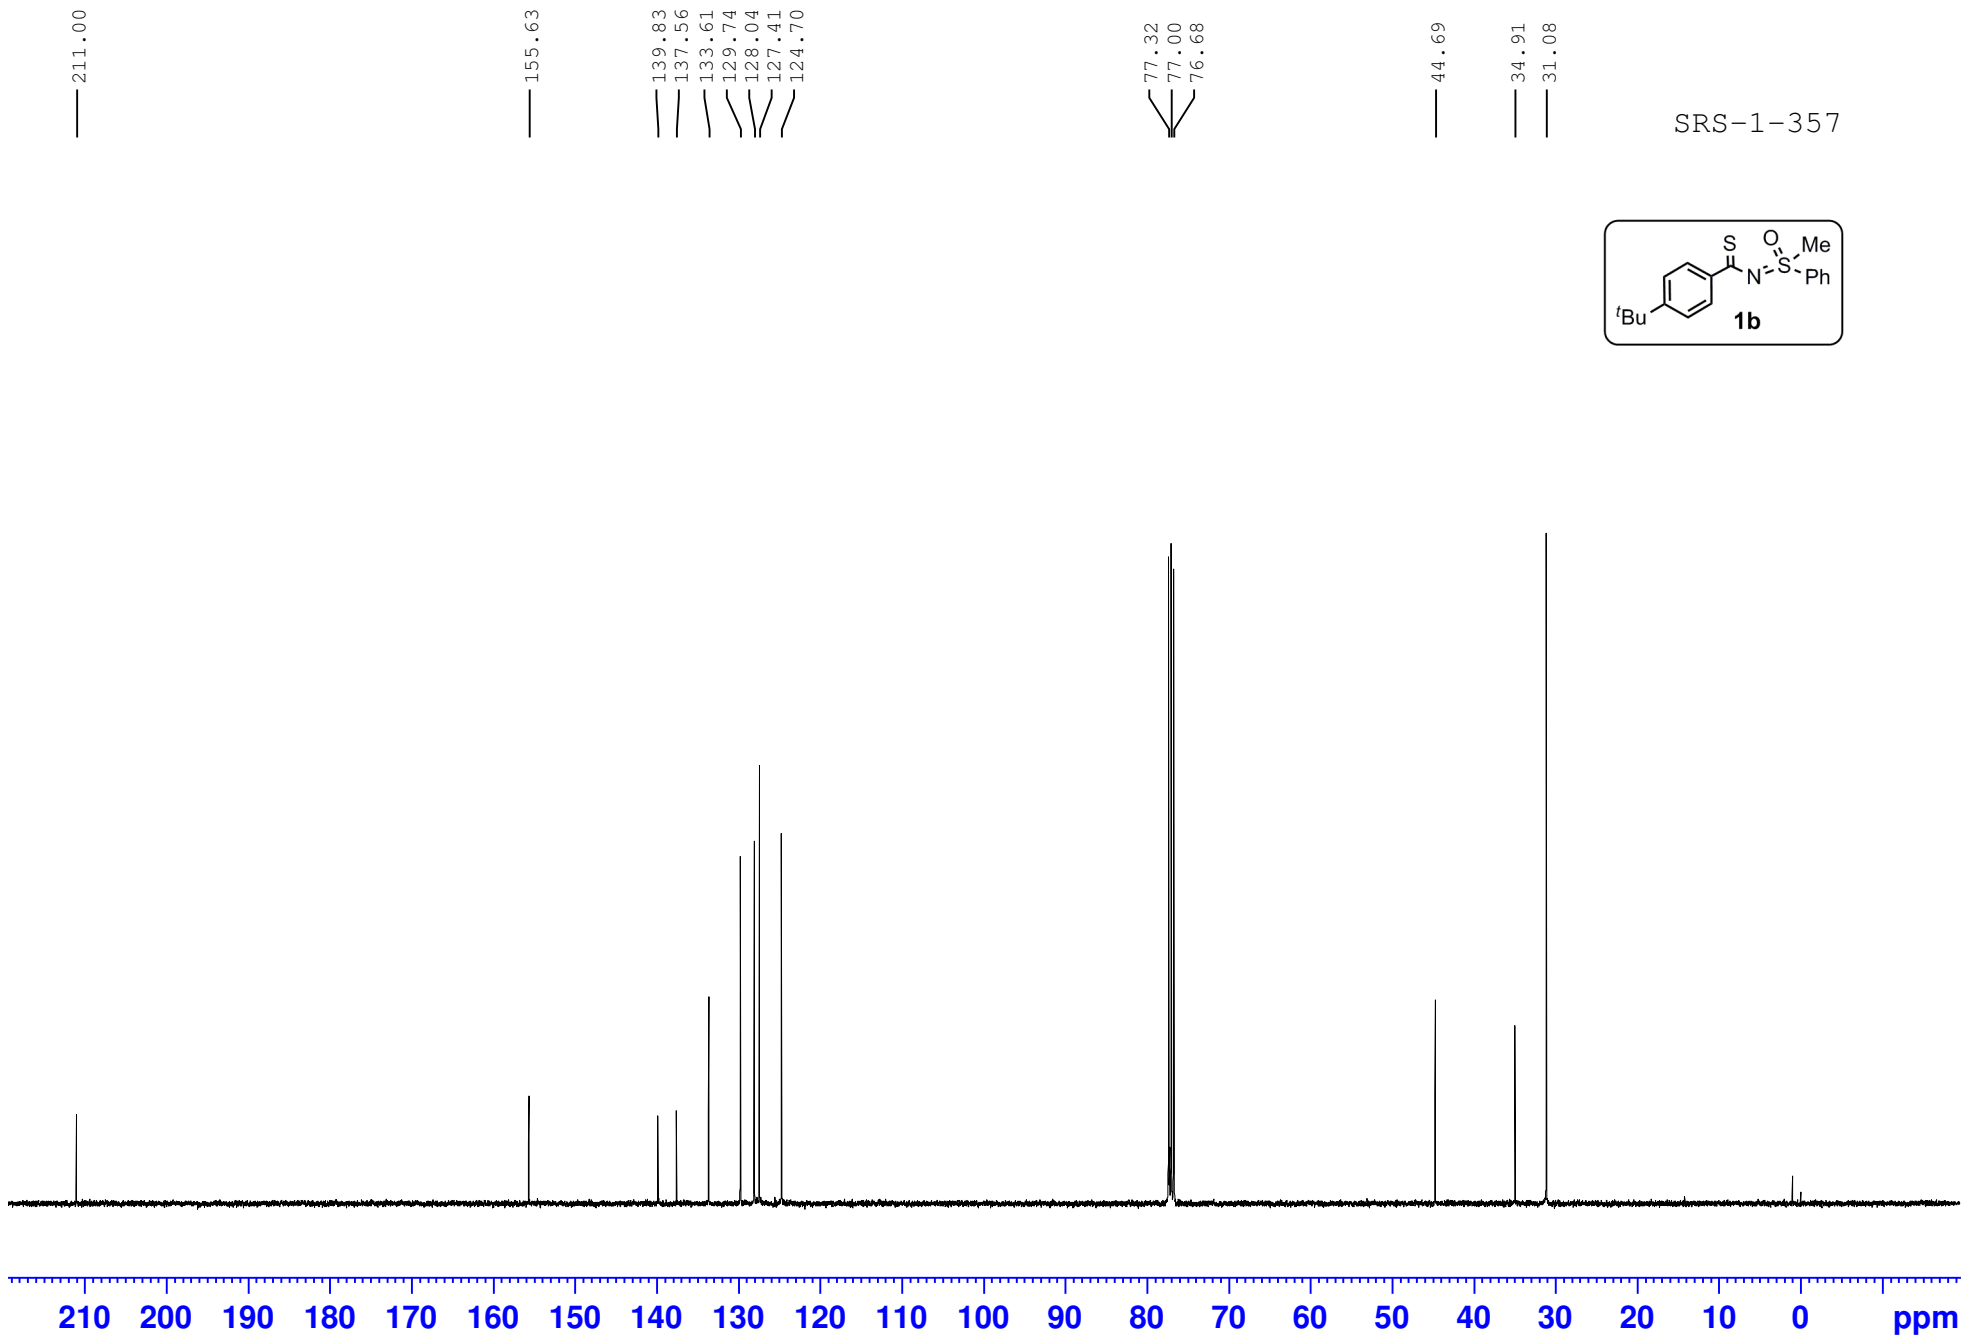

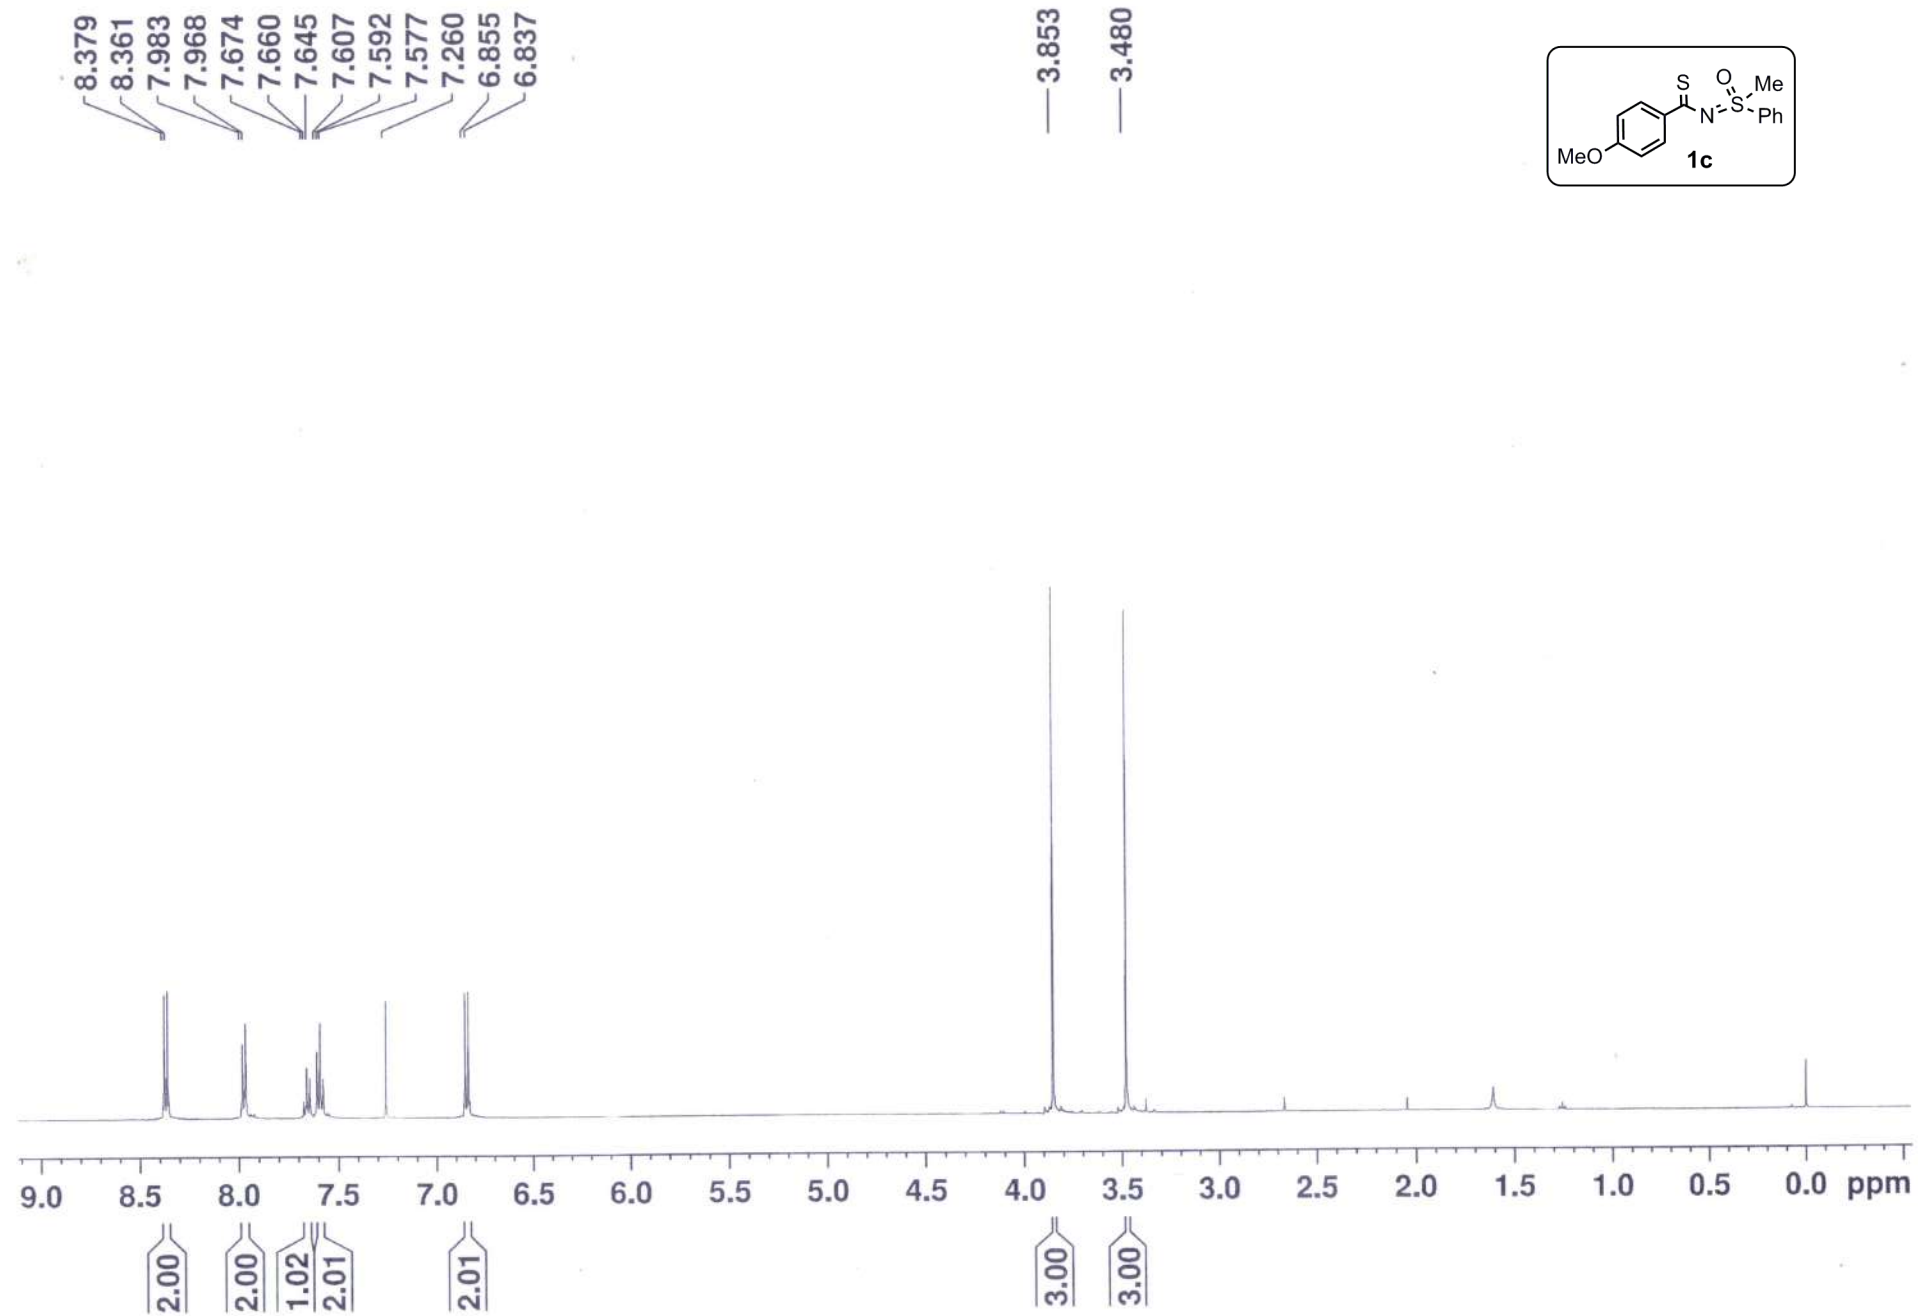

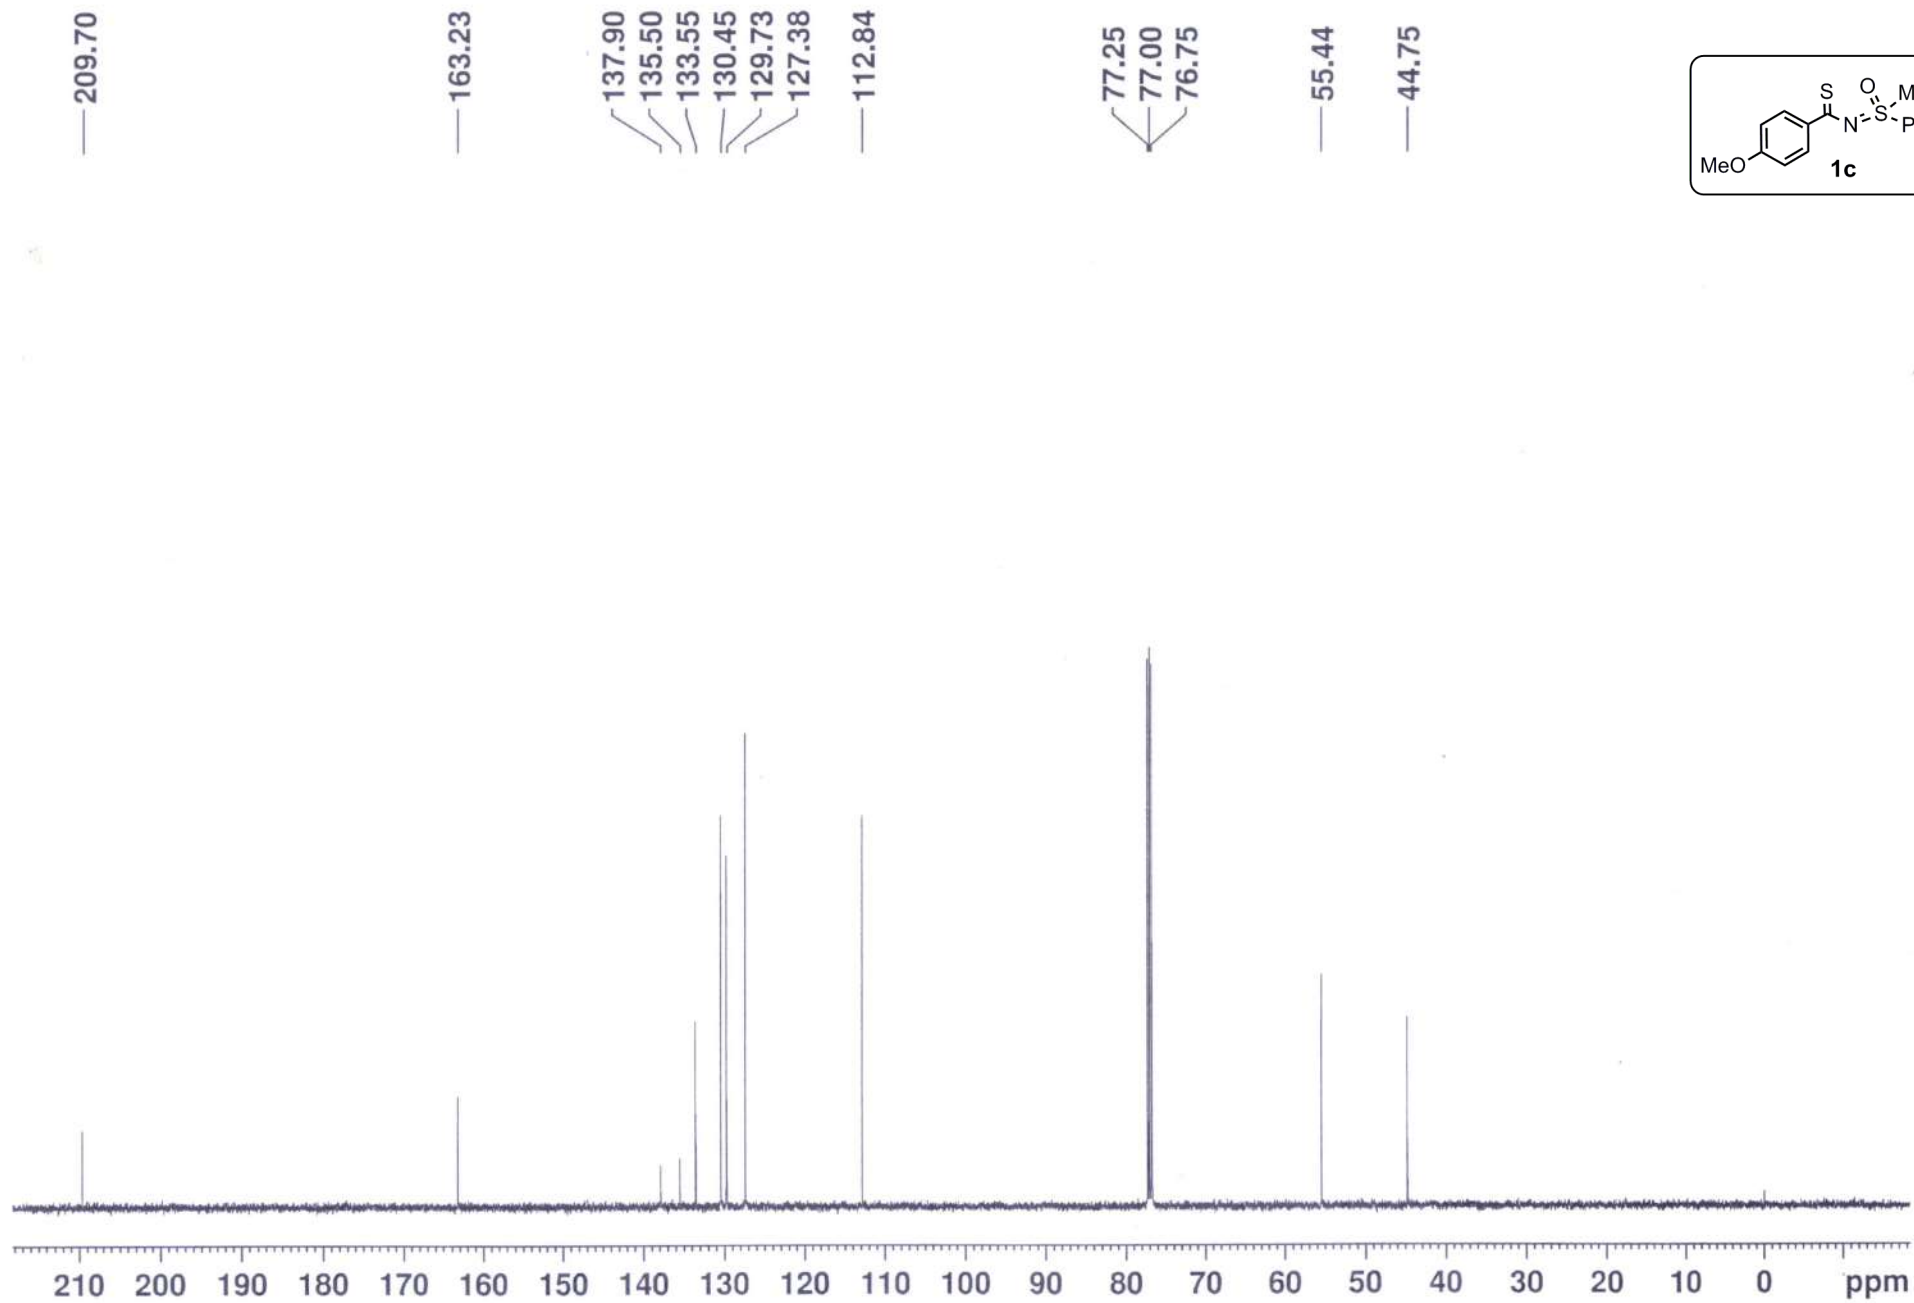

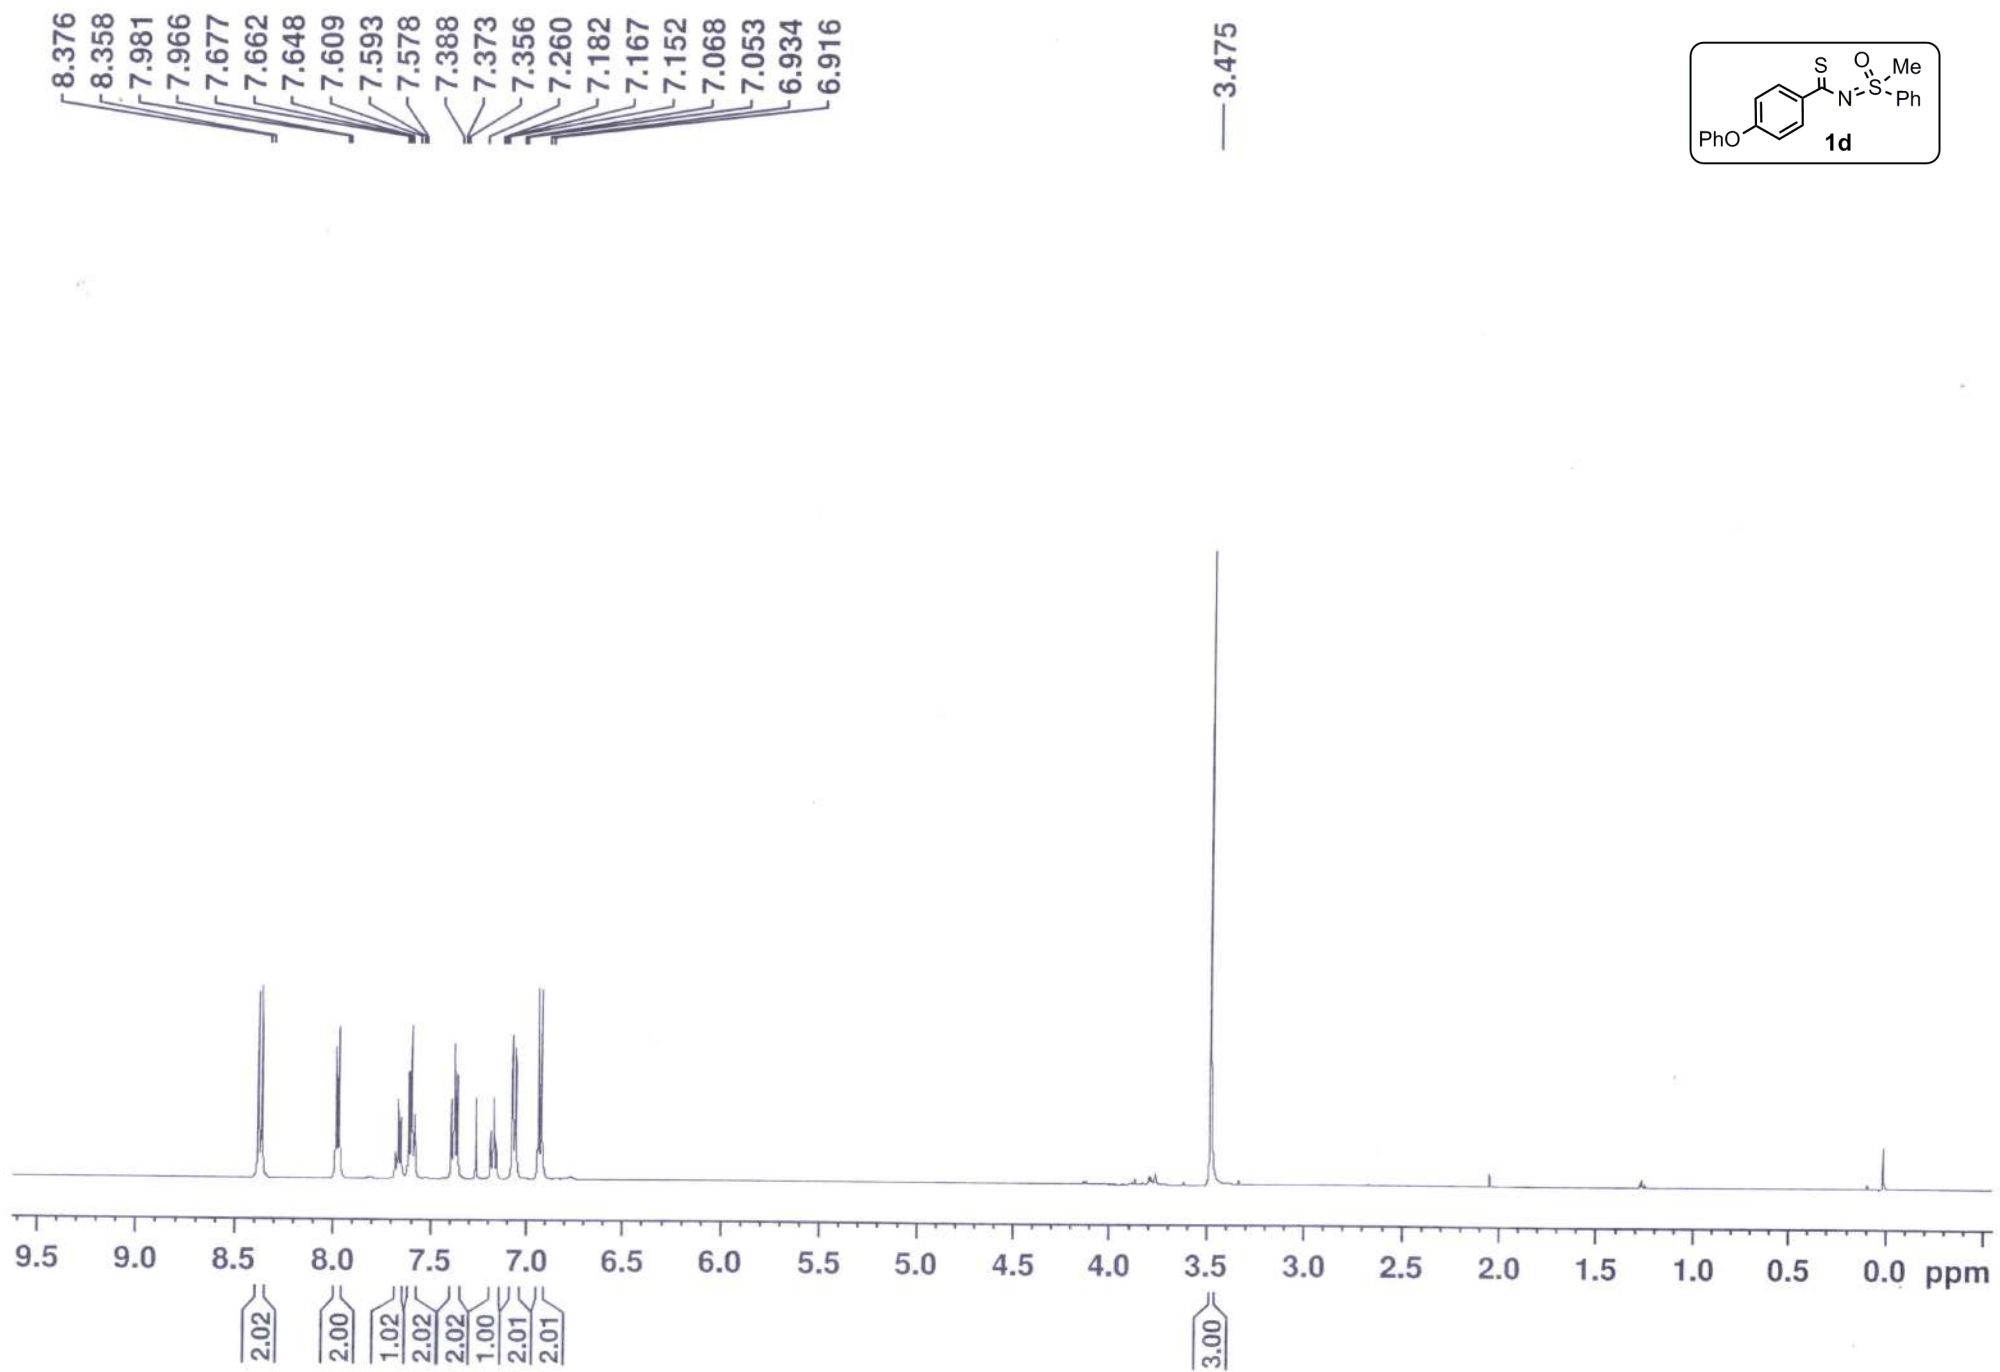

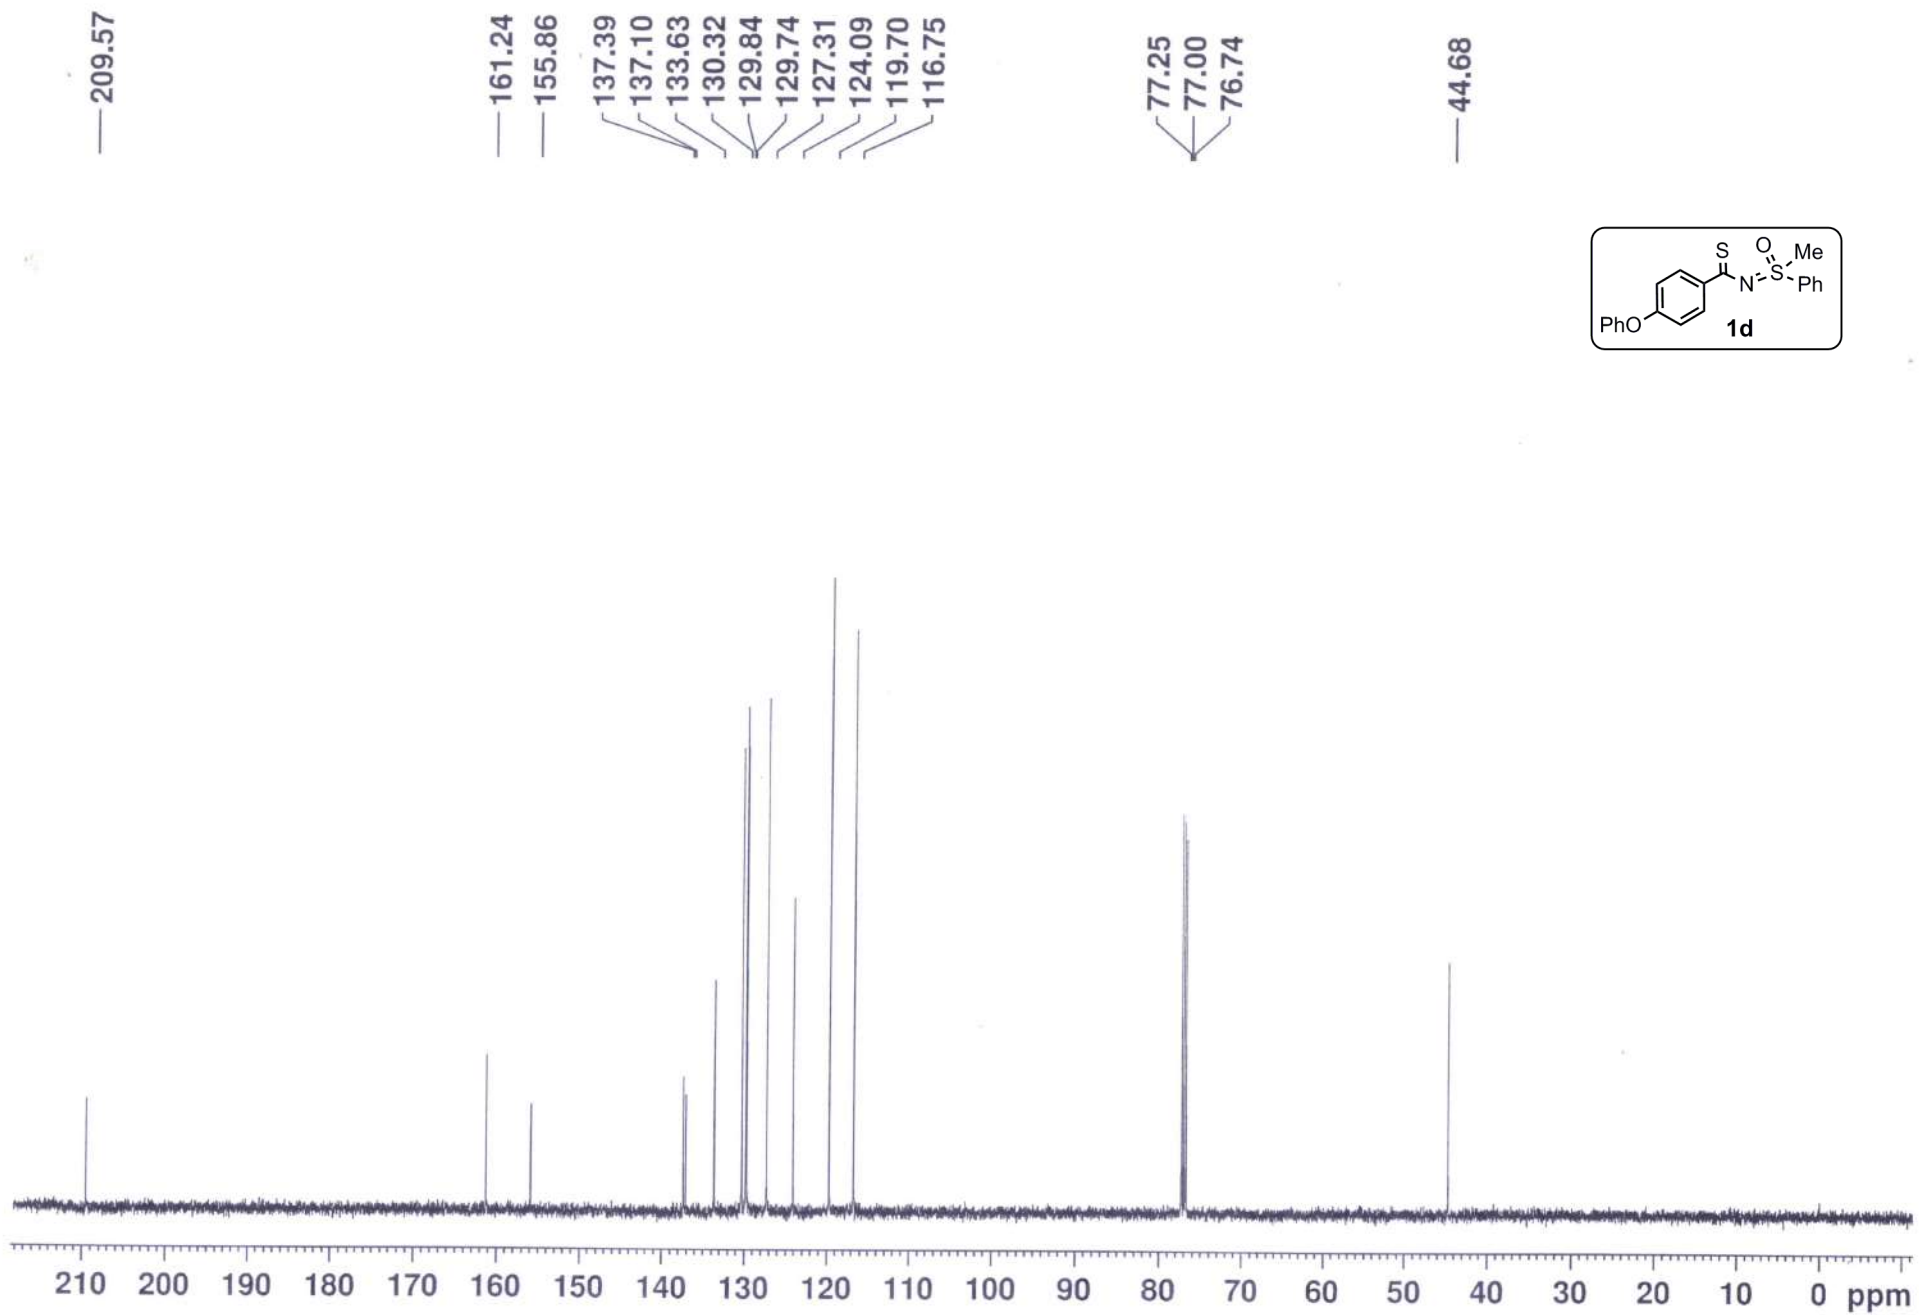

AS-305

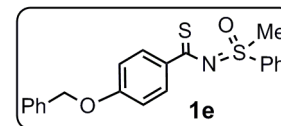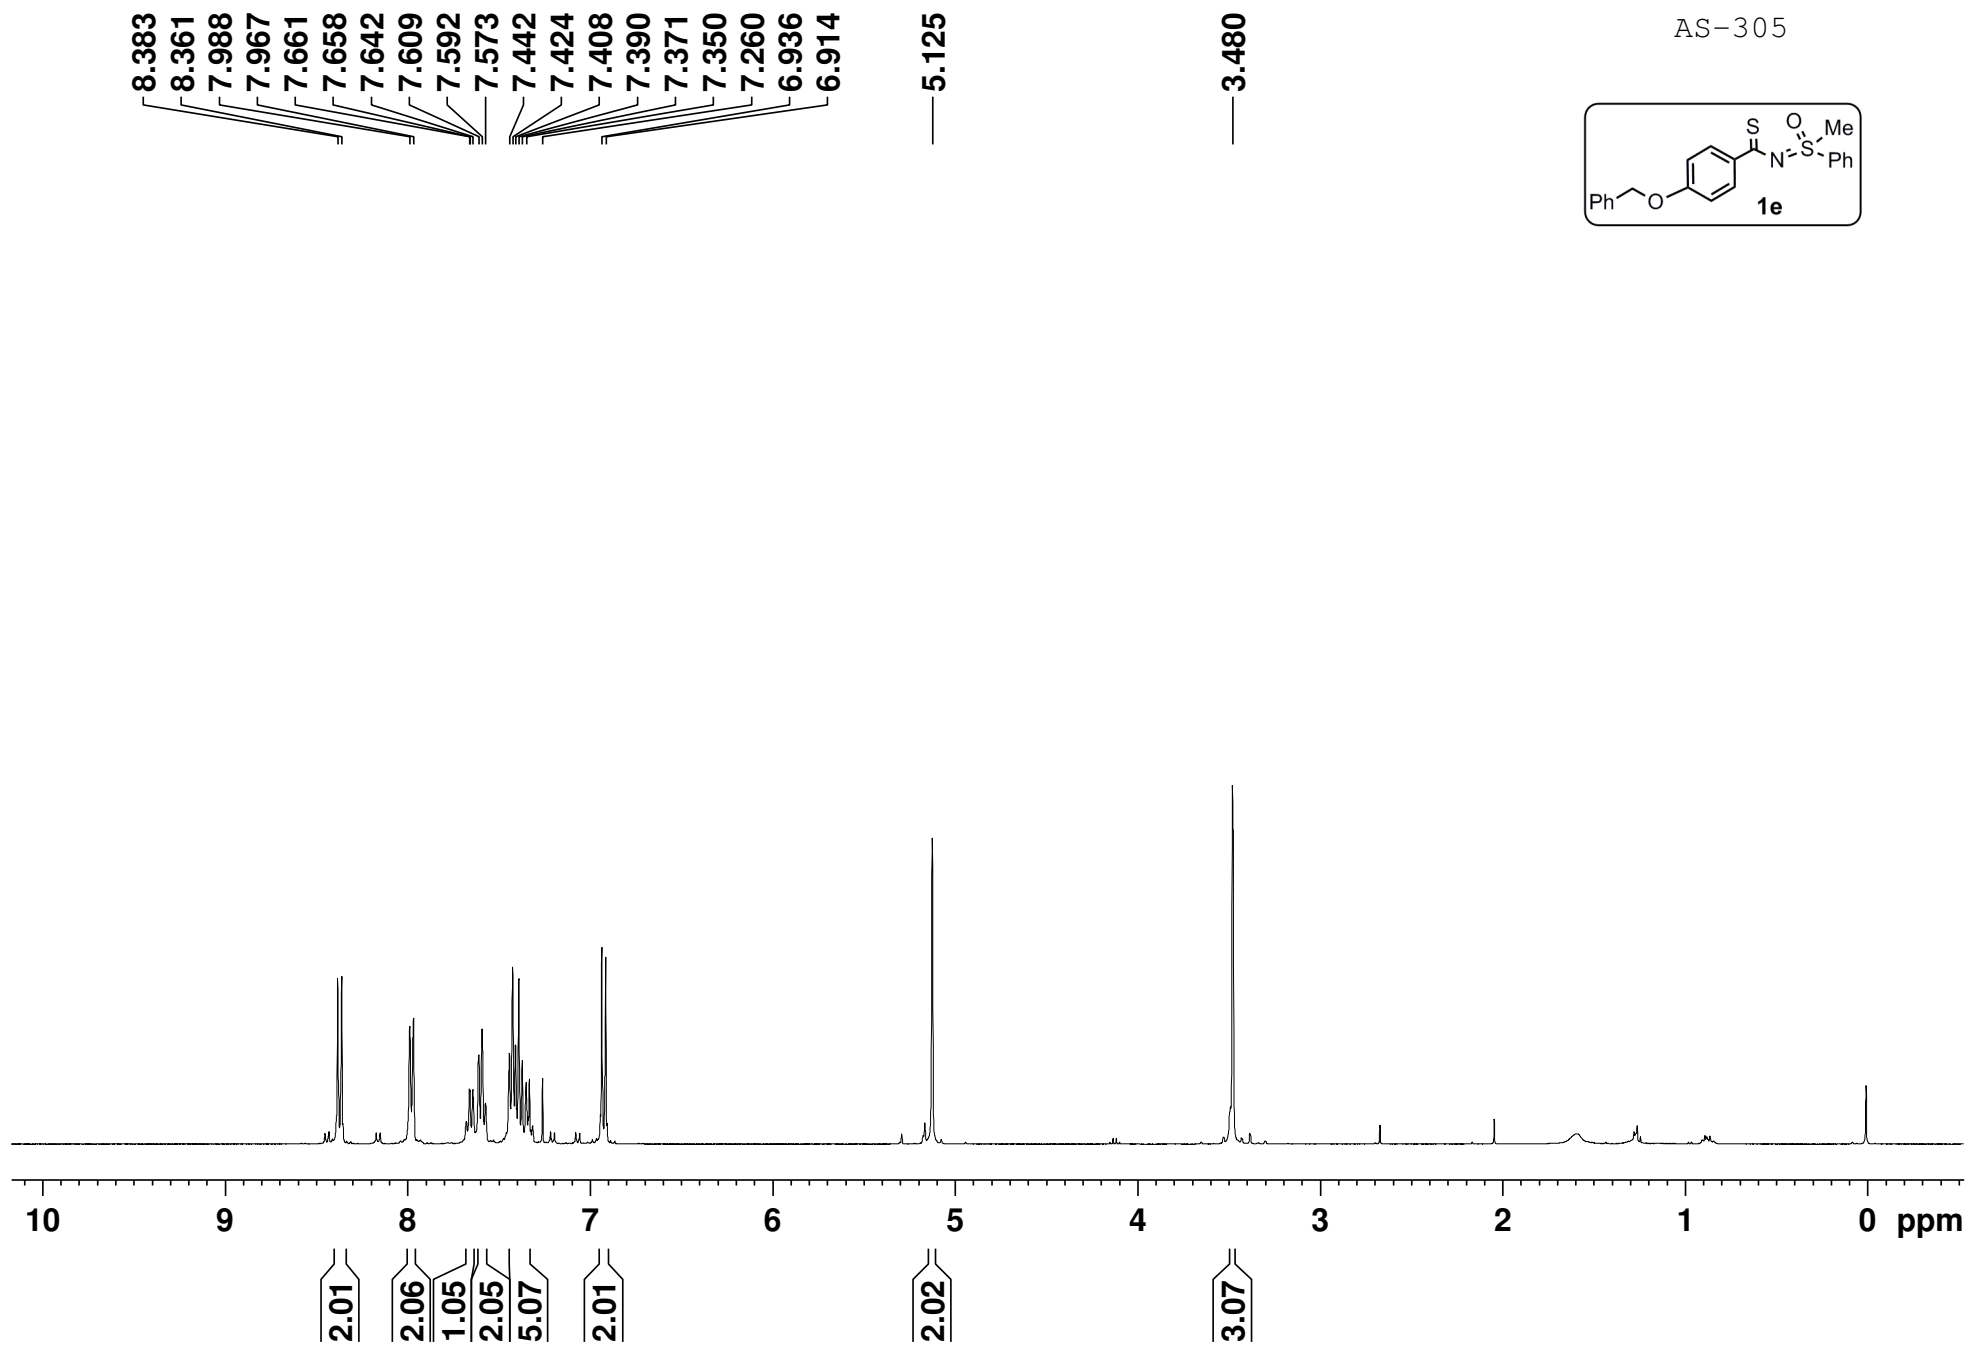



— 209.68

— 162.38

137.93  
136.47  
135.73  
133.56  
130.45  
129.74  
128.61  
128.08  
127.43  
127.40  
113.75

77.32  
77.00  
76.68  
70.09

— 44.73

AS-305

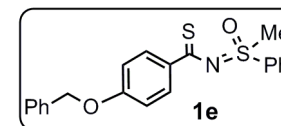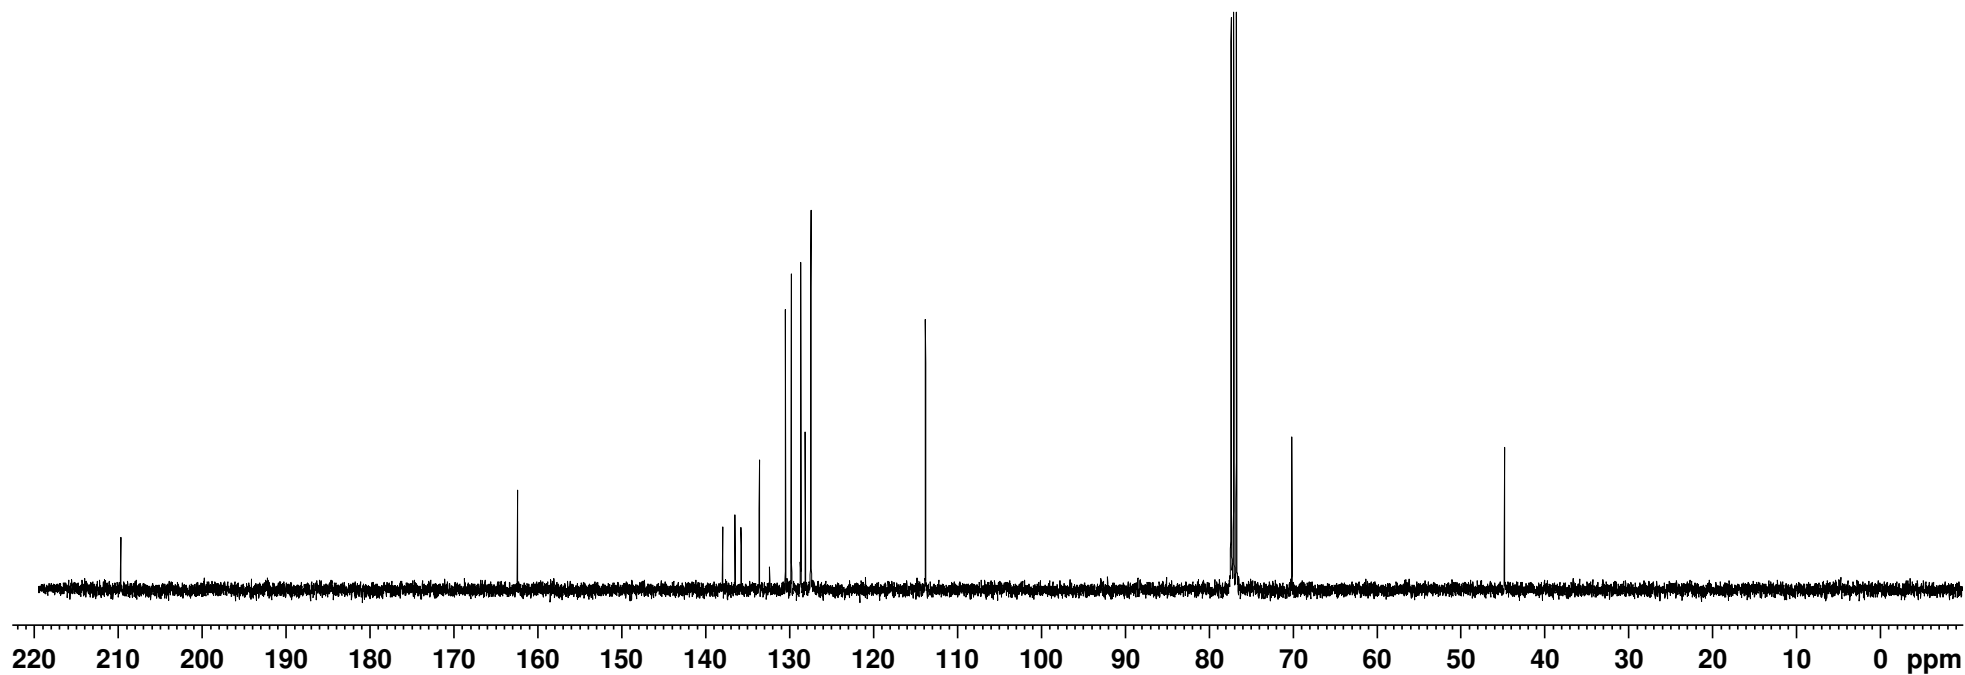

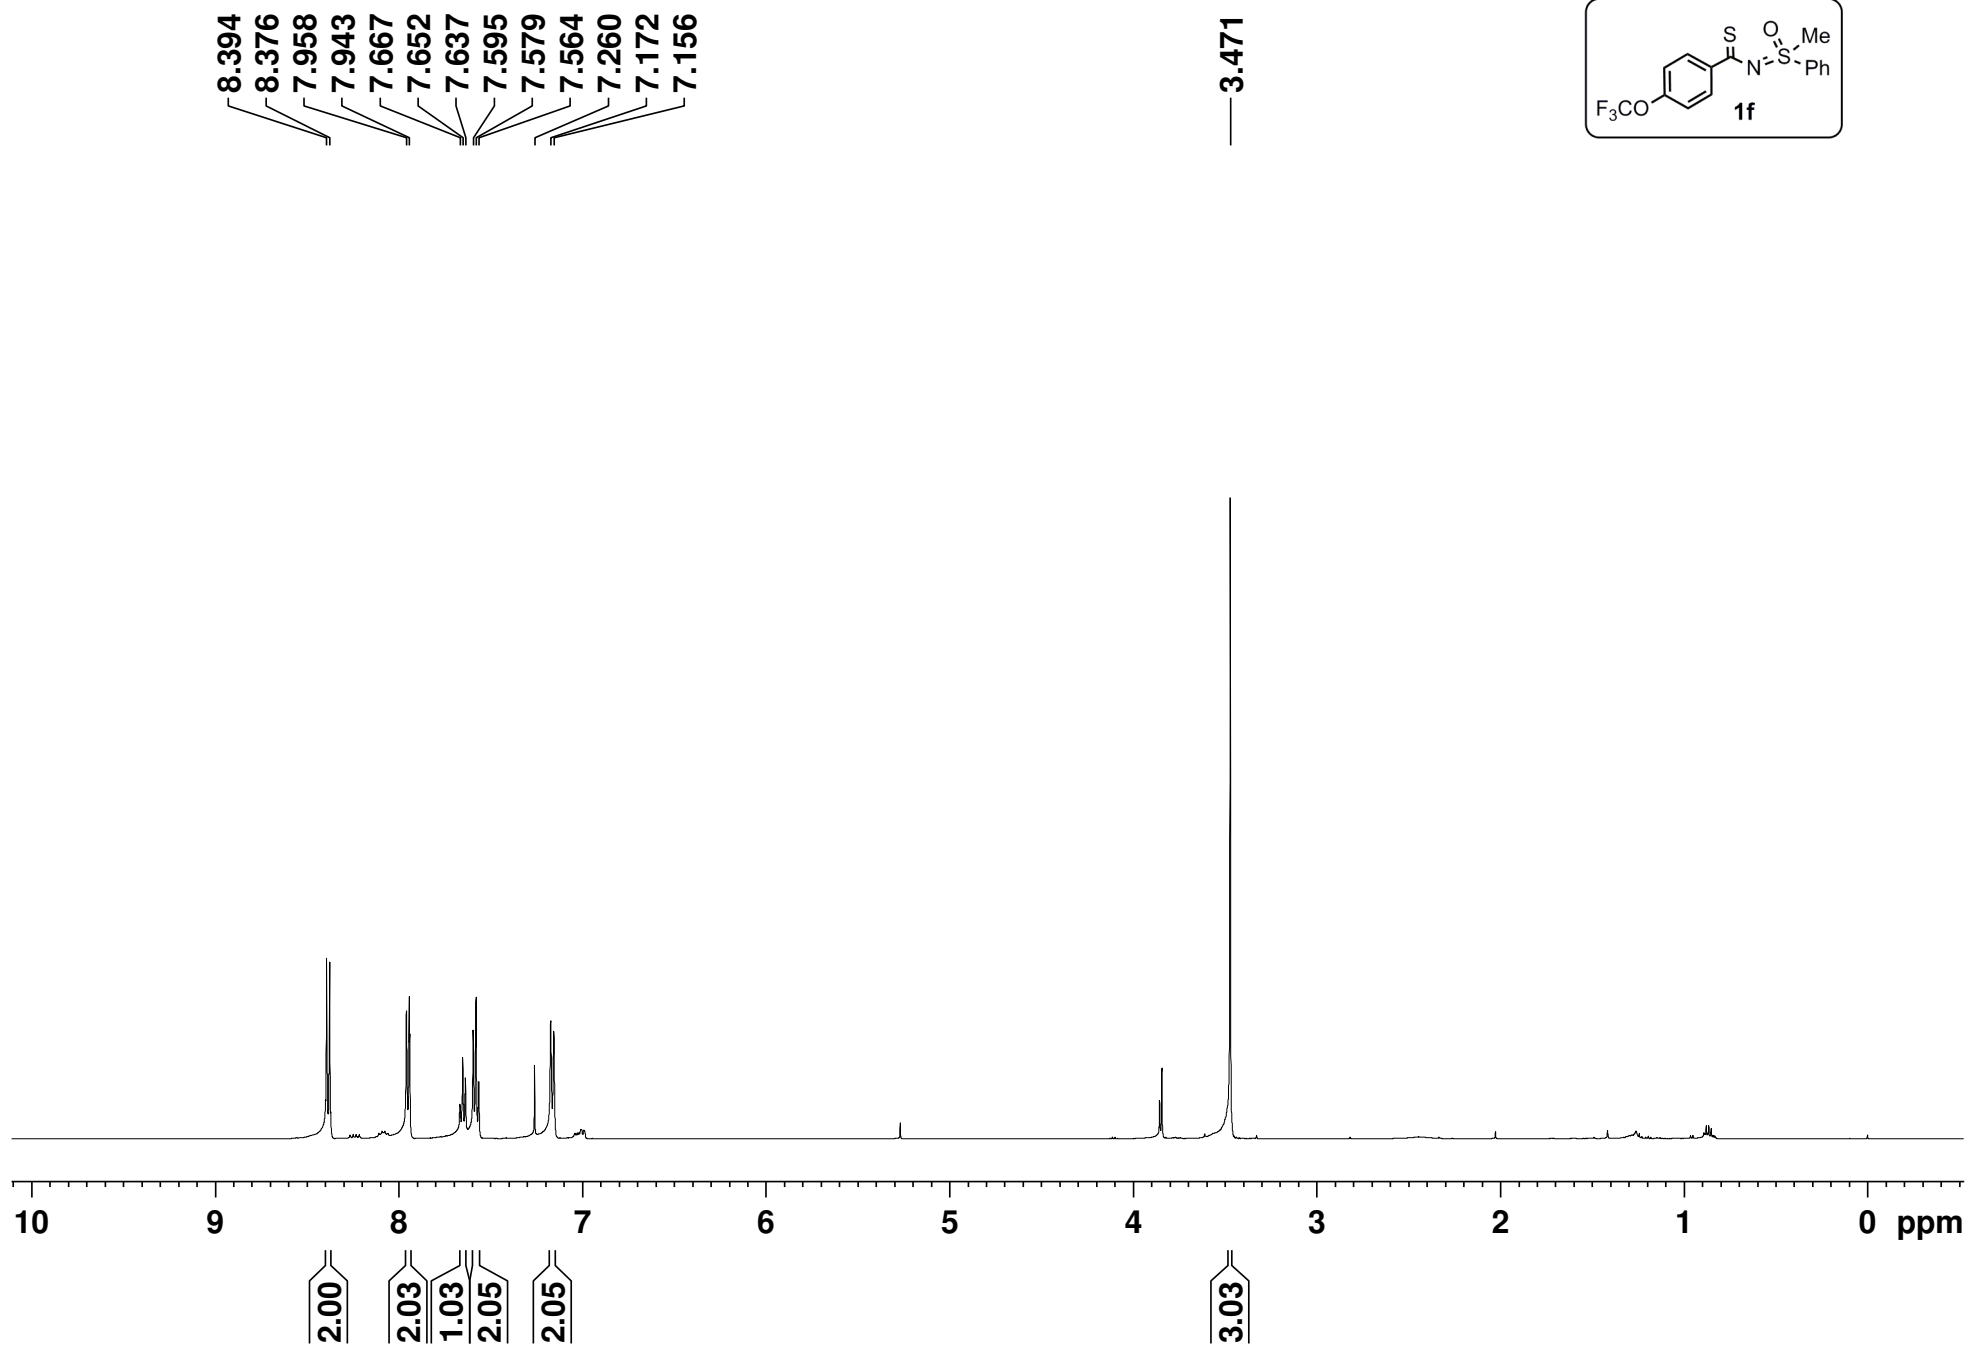

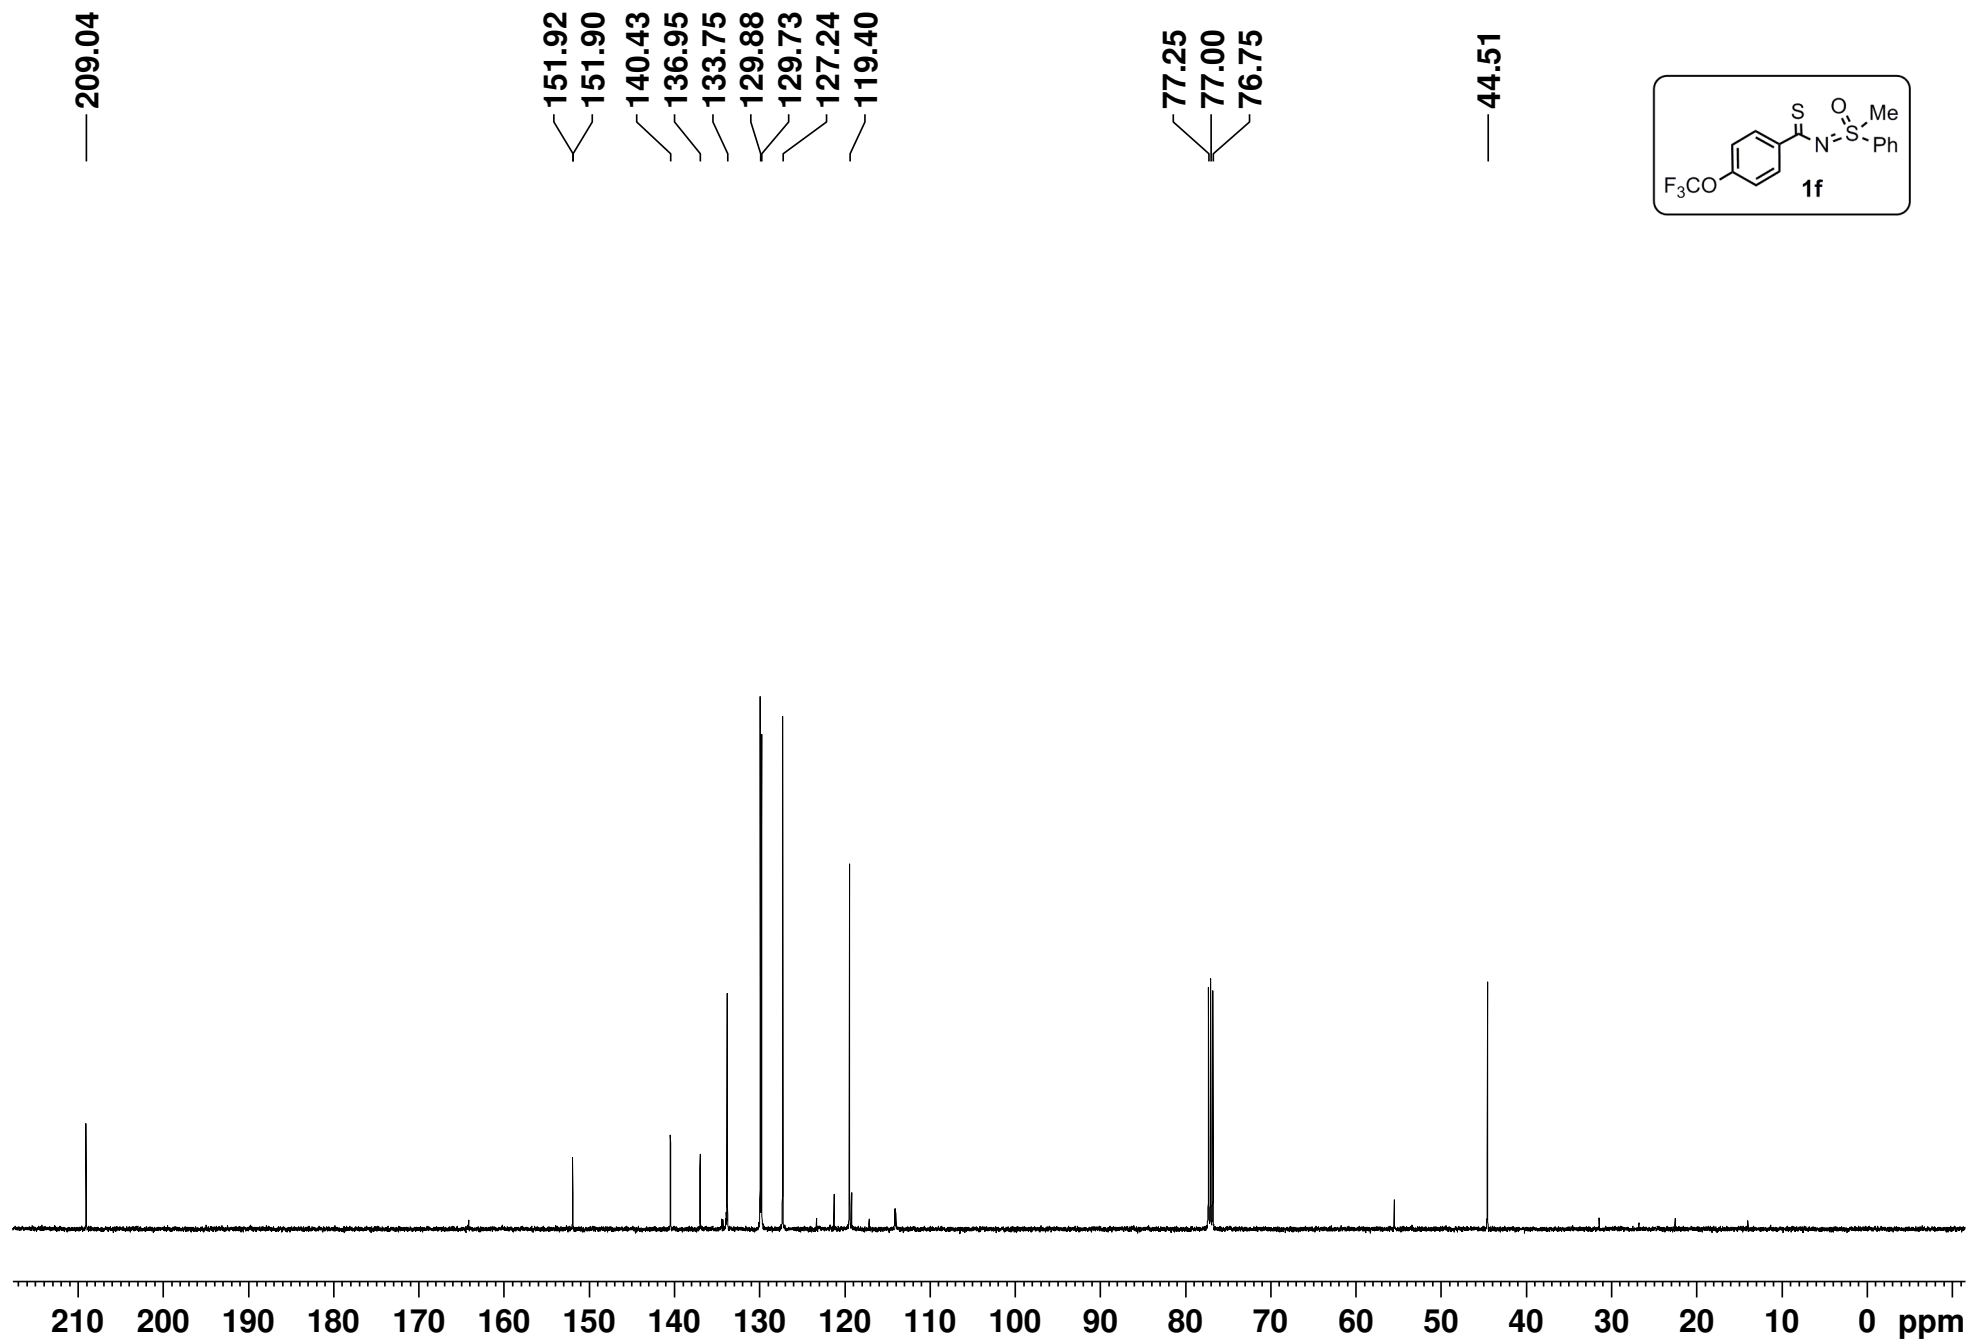

AS-OCF3

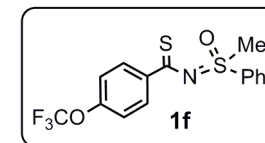

-57.54

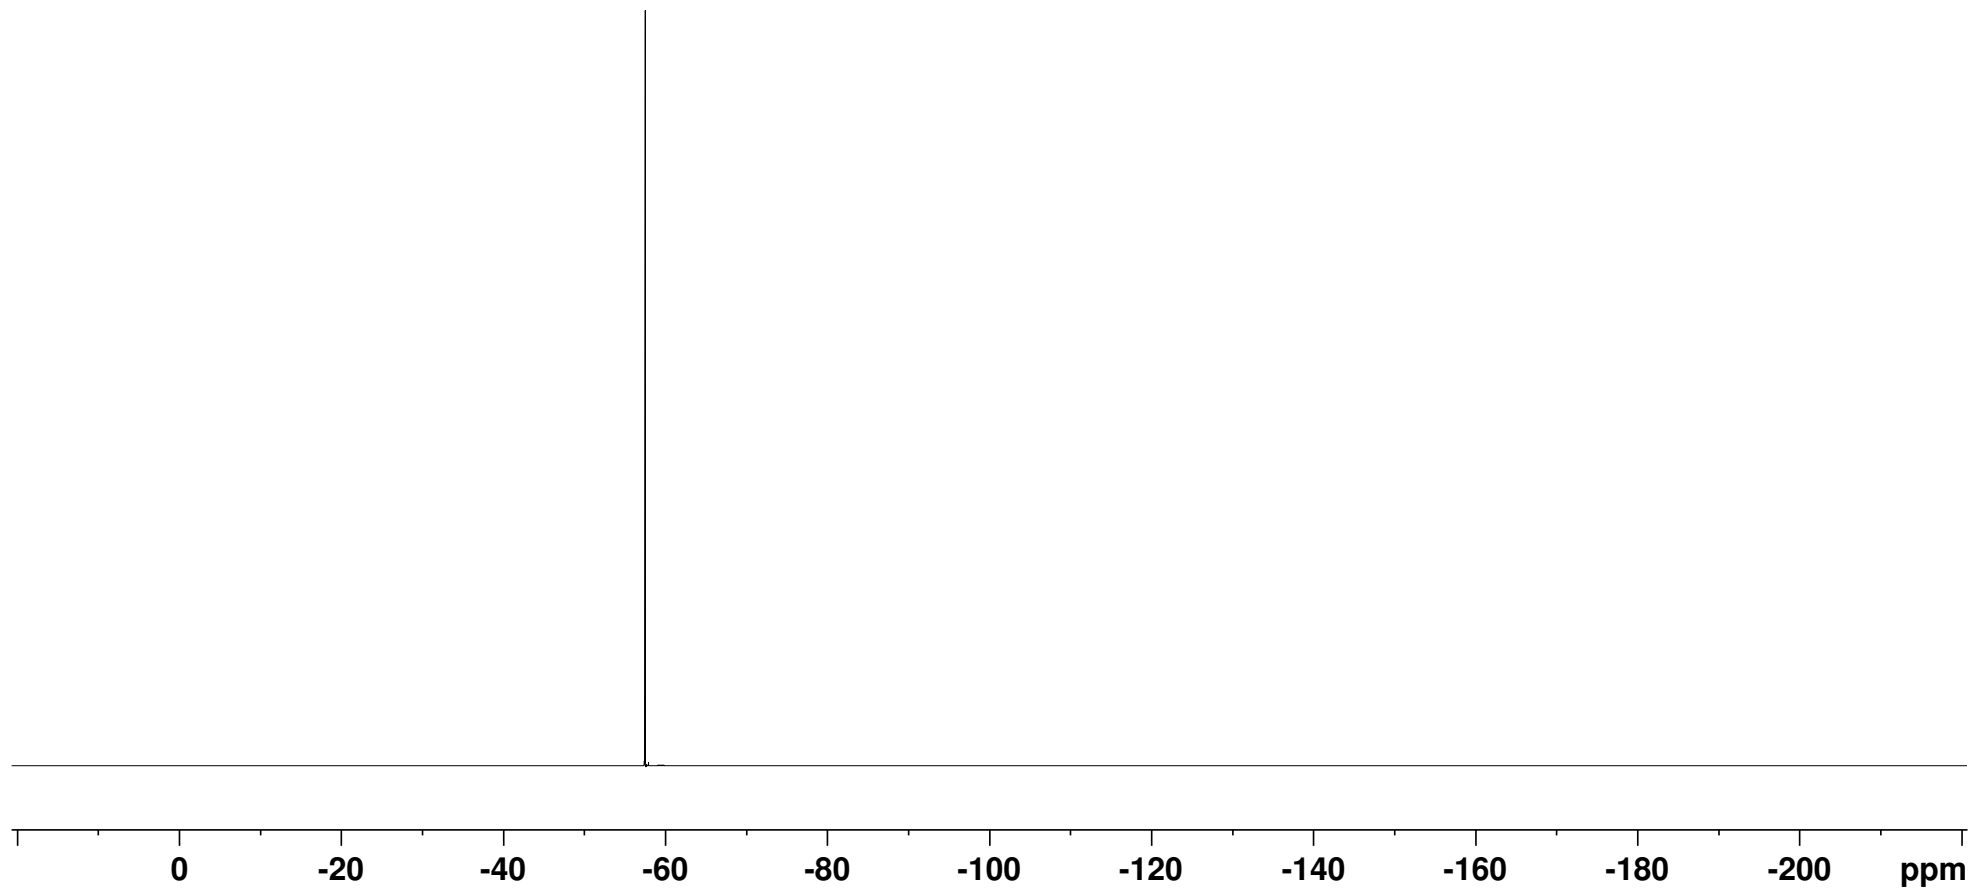

Mj-18-14

8.362  
8.360  
8.342  
8.338  
7.981  
7.962  
7.675  
7.657  
7.641  
7.604  
7.587  
7.585  
7.566  
7.518  
7.515  
7.497  
7.481  
7.479  
7.379  
7.359  
7.340  
7.260

— 3.473

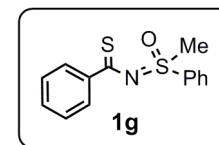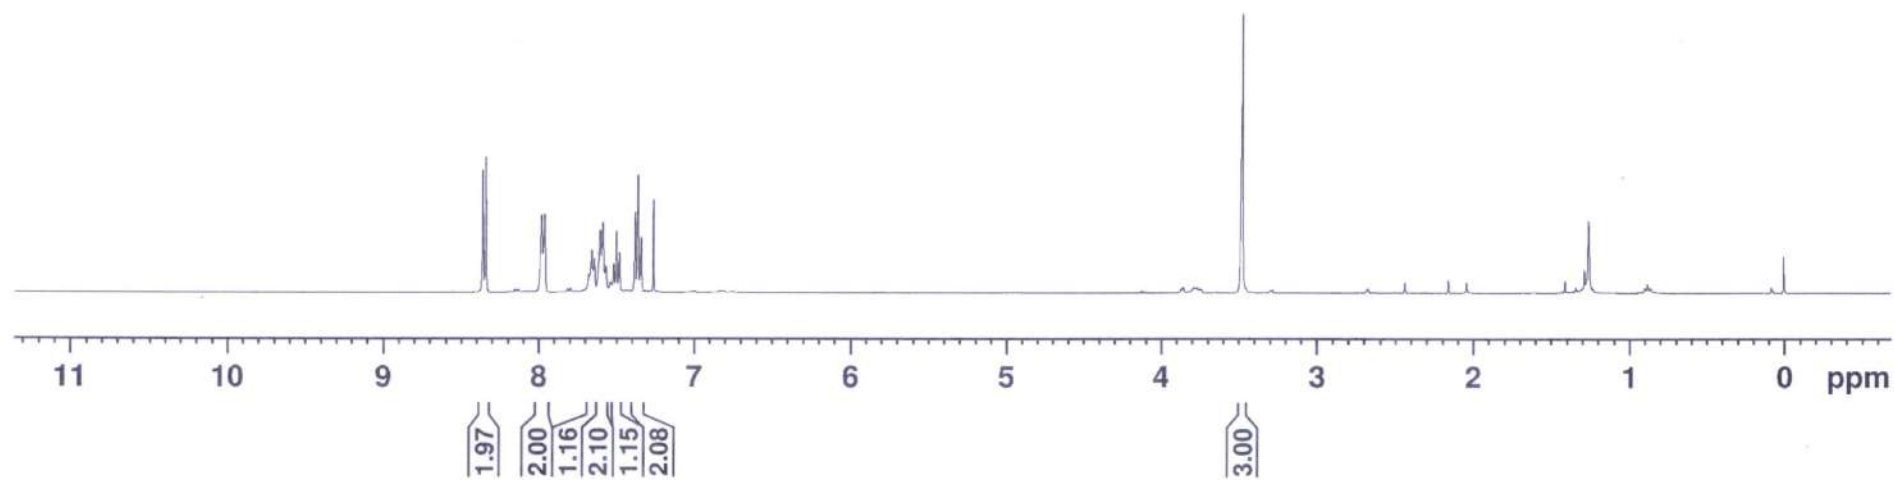

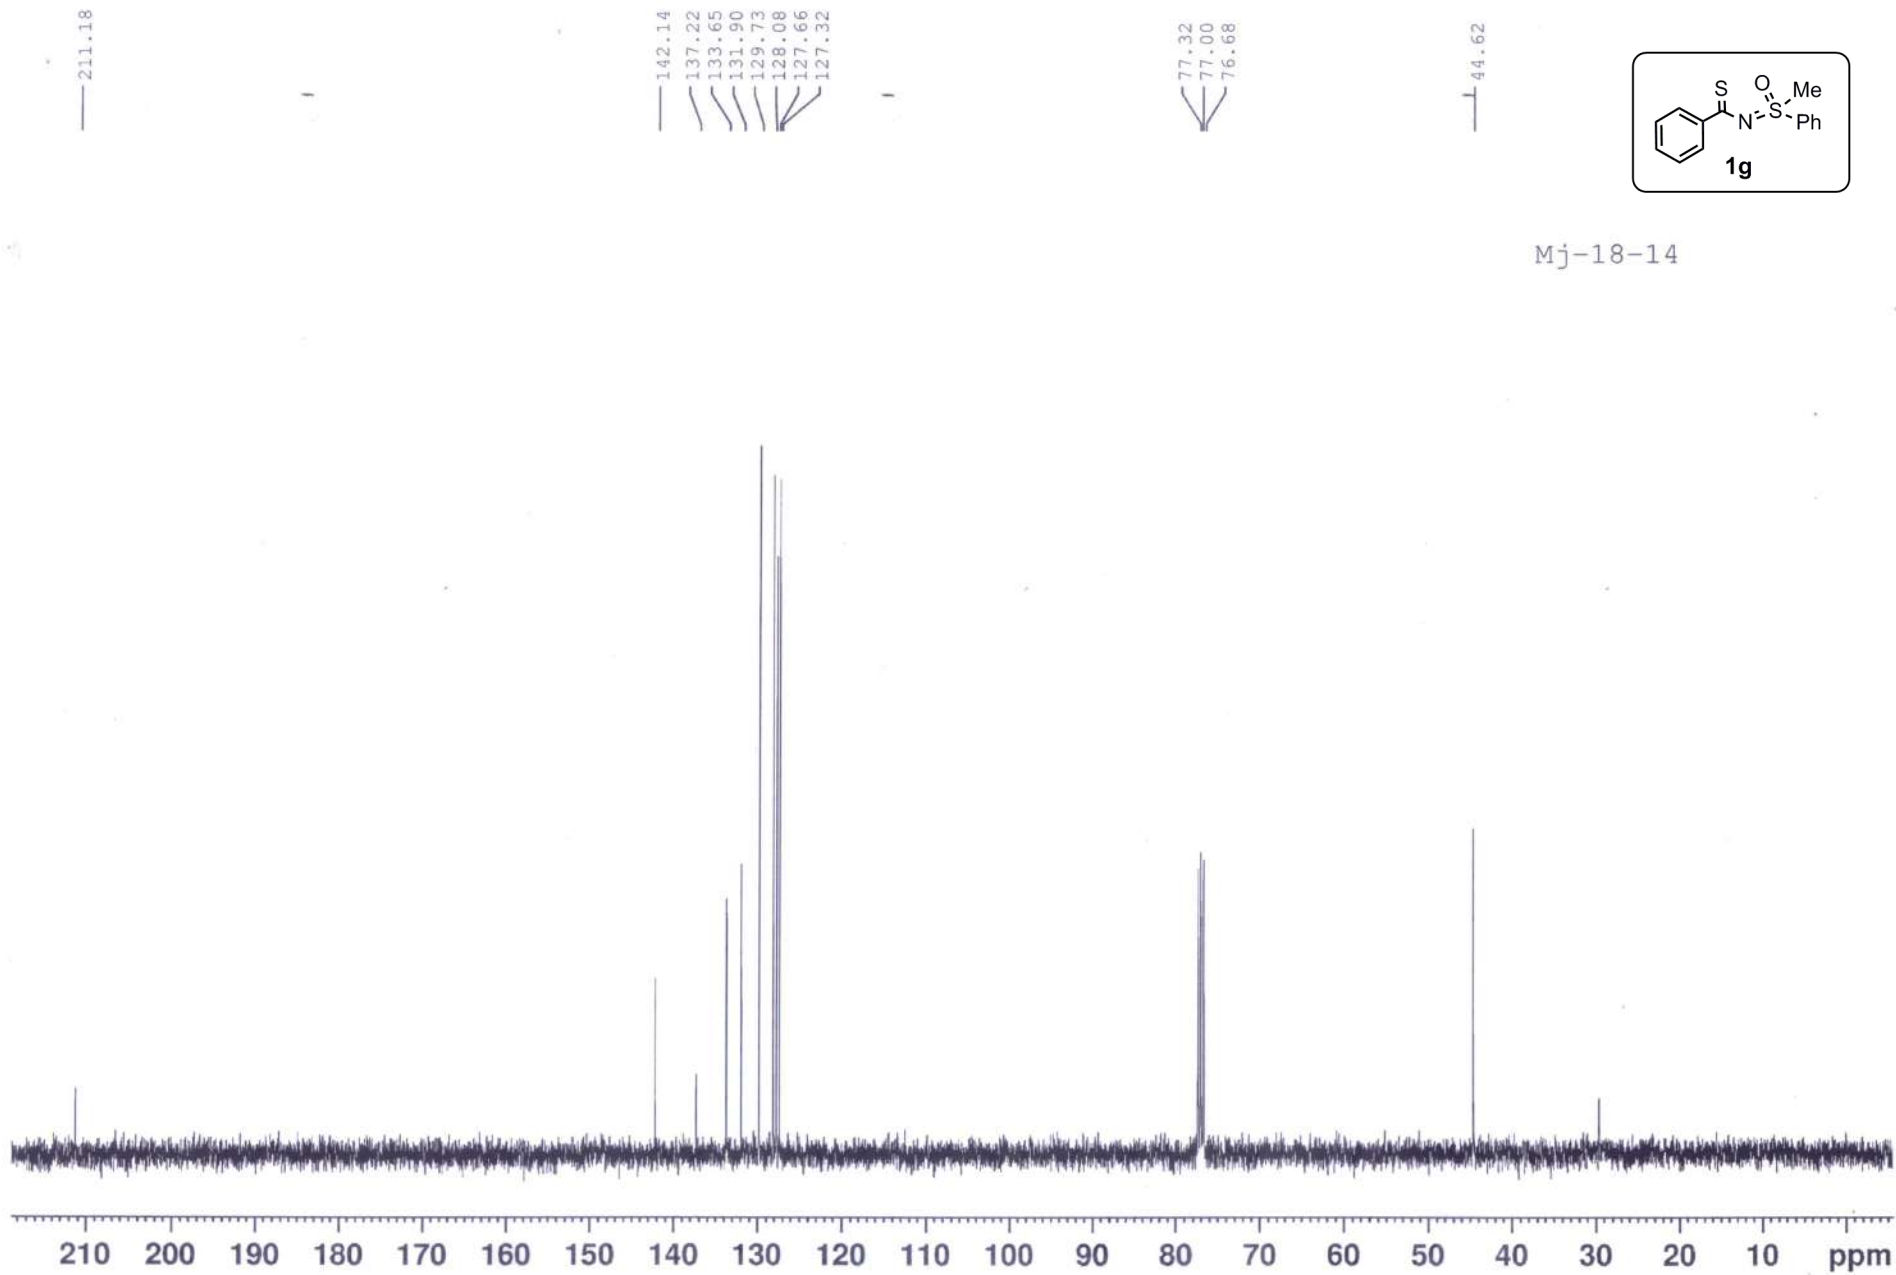

Mj-18-14

8.393  
8.381  
8.376  
8.364  
7.976  
7.961  
7.690  
7.675  
7.661  
7.620  
7.606  
7.591  
7.260  
7.032  
7.015  
6.999

3.484

Majji -MJ--06-14

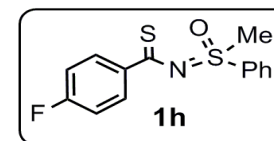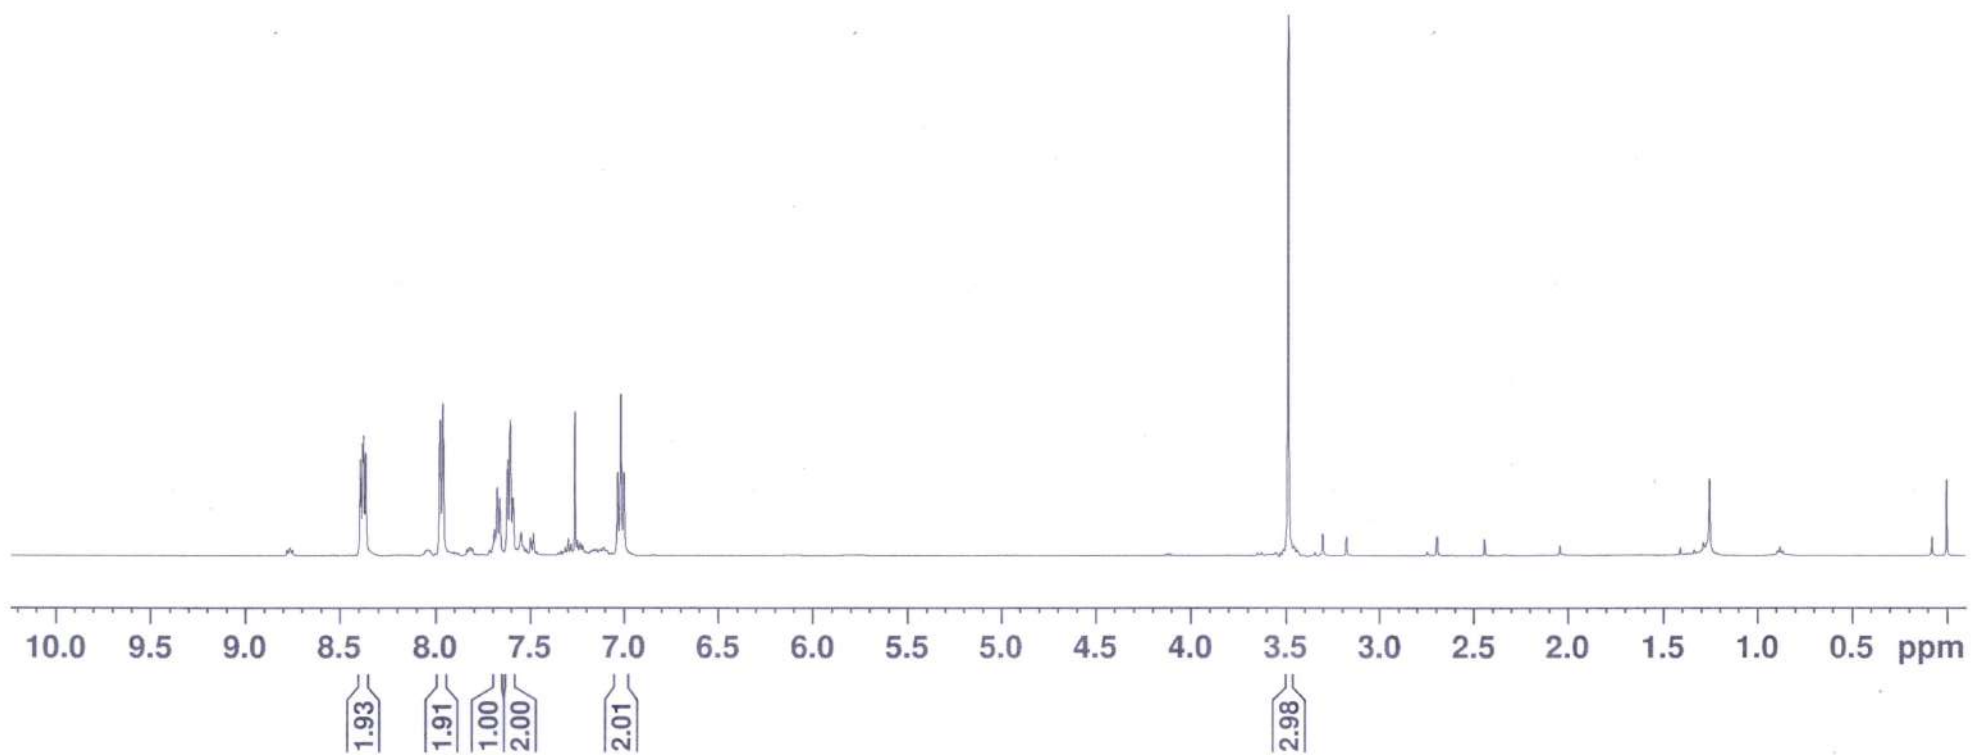

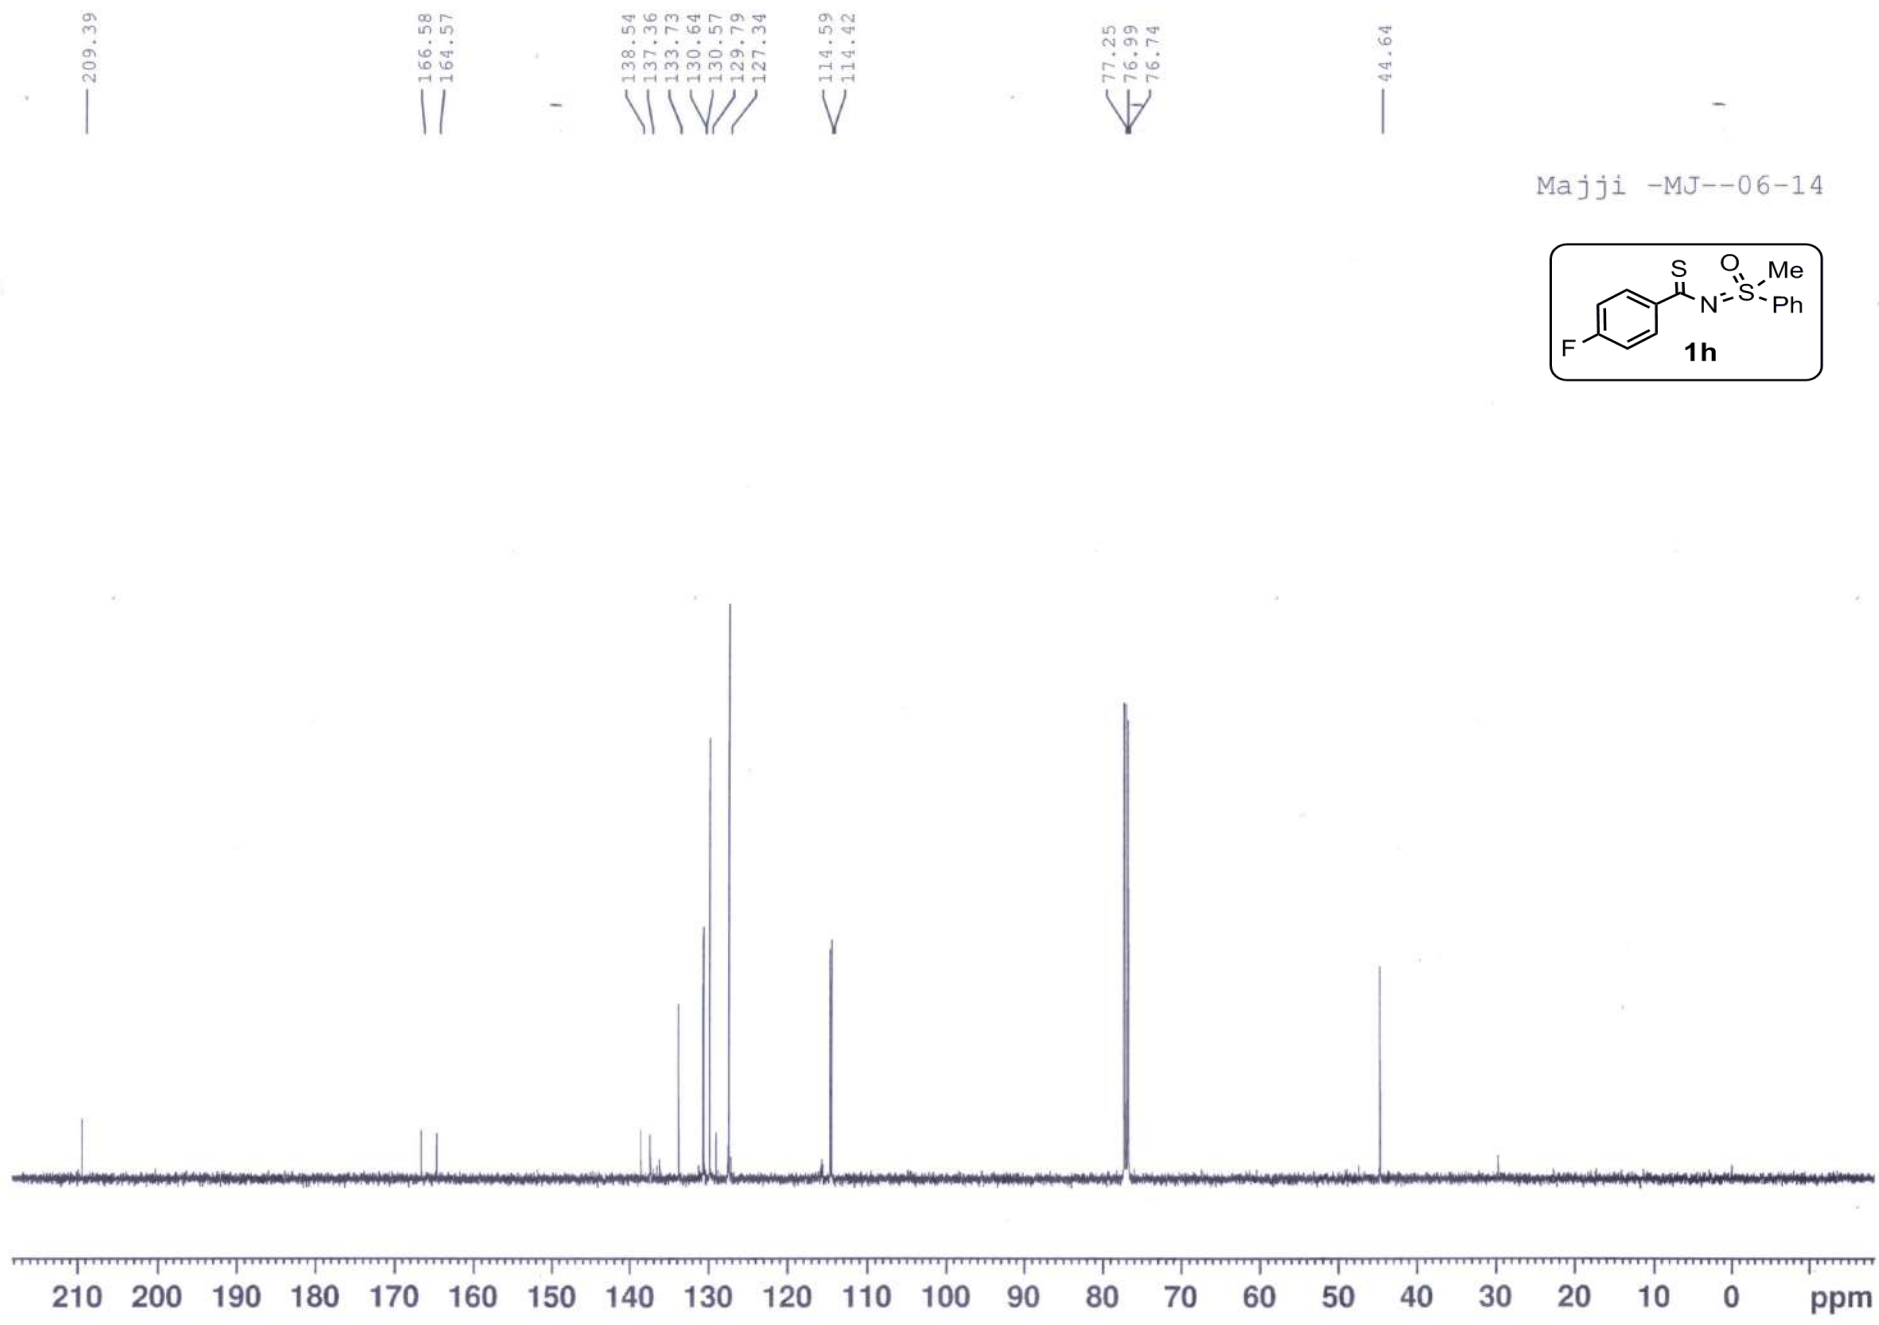

Majji -MJ--06-14

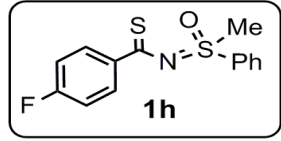



Majji -MJ--06-14

-108.22

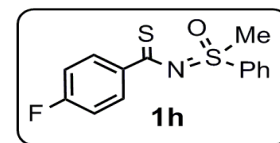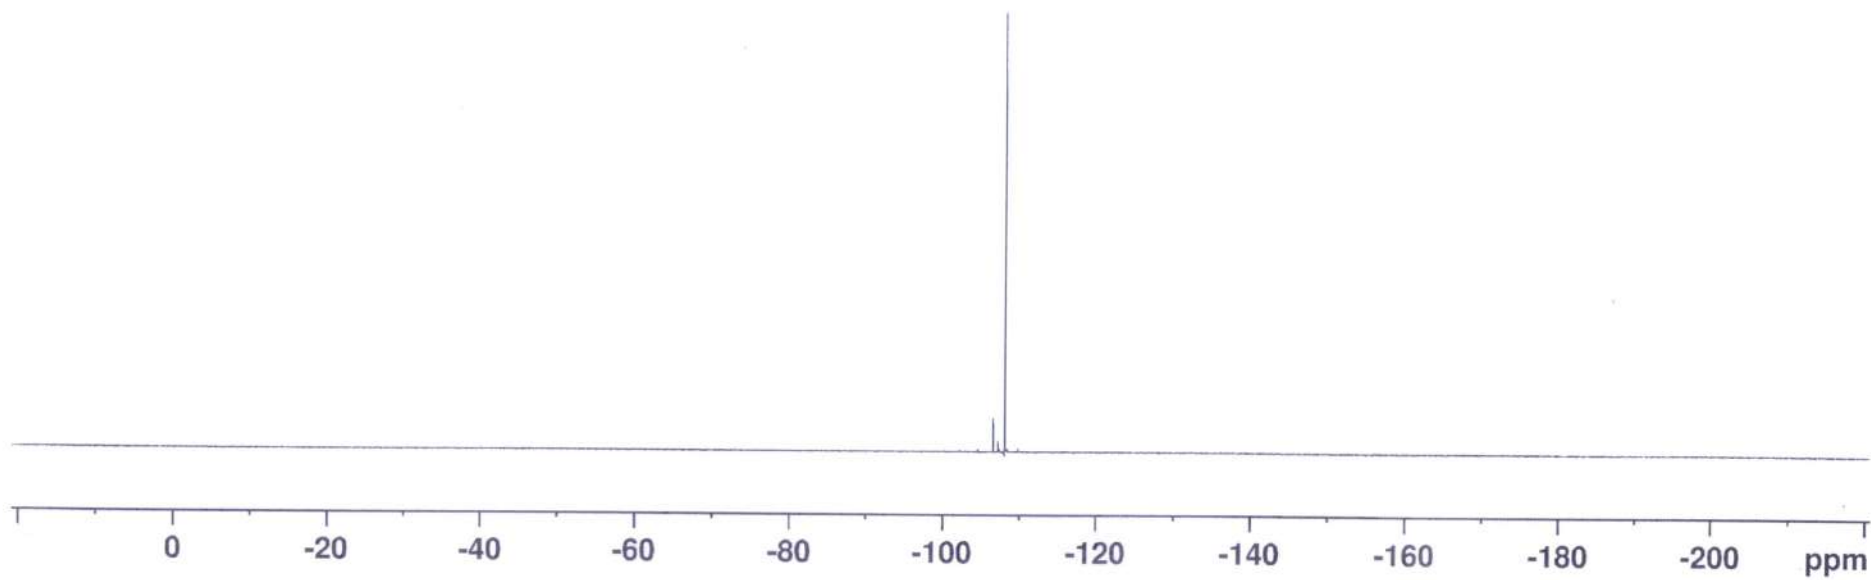

Majji -MJ--14-14

8.302  
8.285  
7.973  
7.958  
7.696  
7.681  
7.666  
7.624  
7.609  
7.594  
7.327  
7.310  
7.260

— 3.485

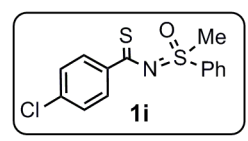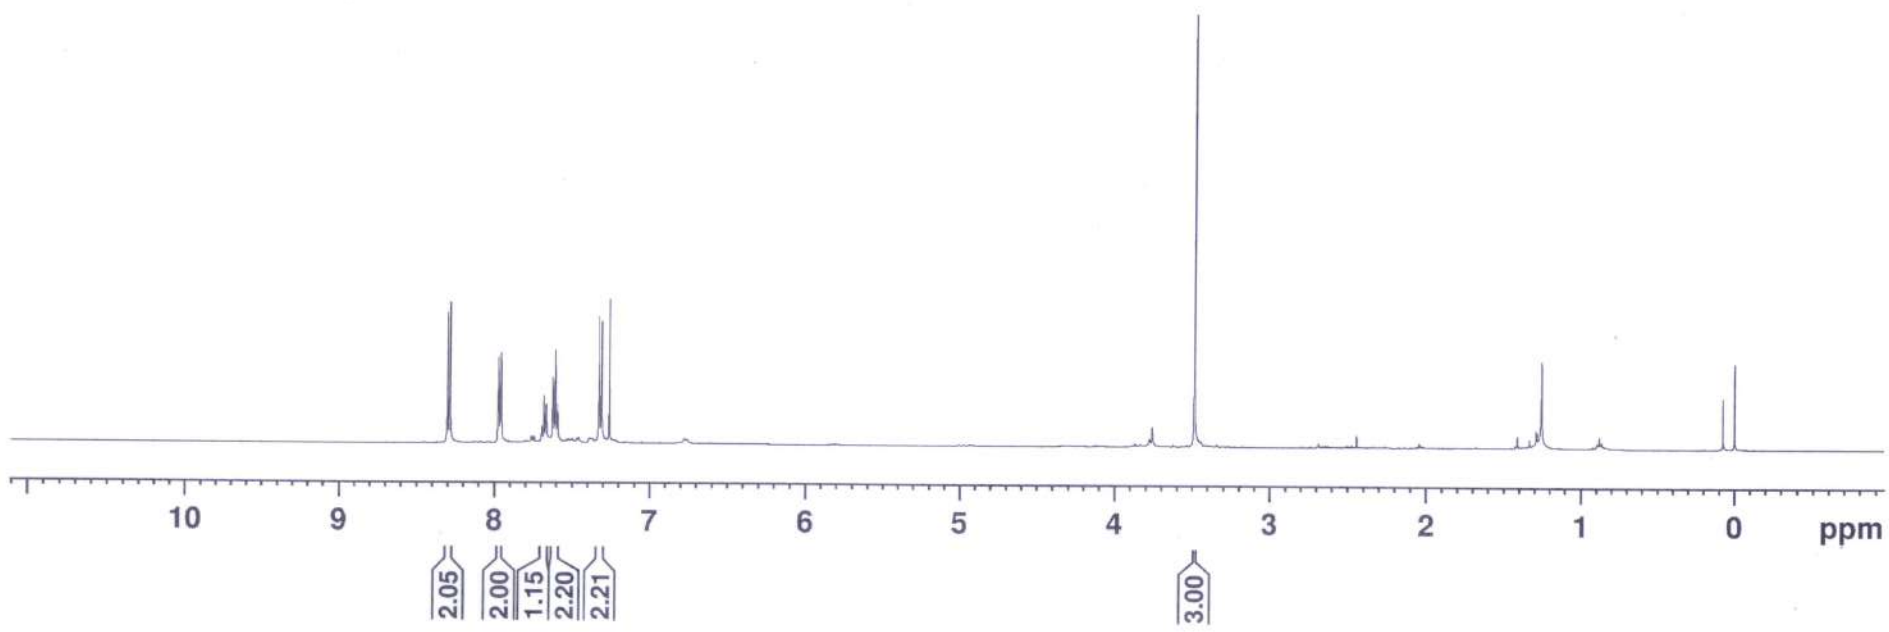

— 209.50

140.55  
138.45  
137.28  
133.79  
129.83  
129.54  
127.85  
127.38

77.25  
77.00  
76.74

— 44.67

Majji -MJ--14-14

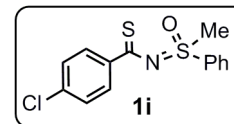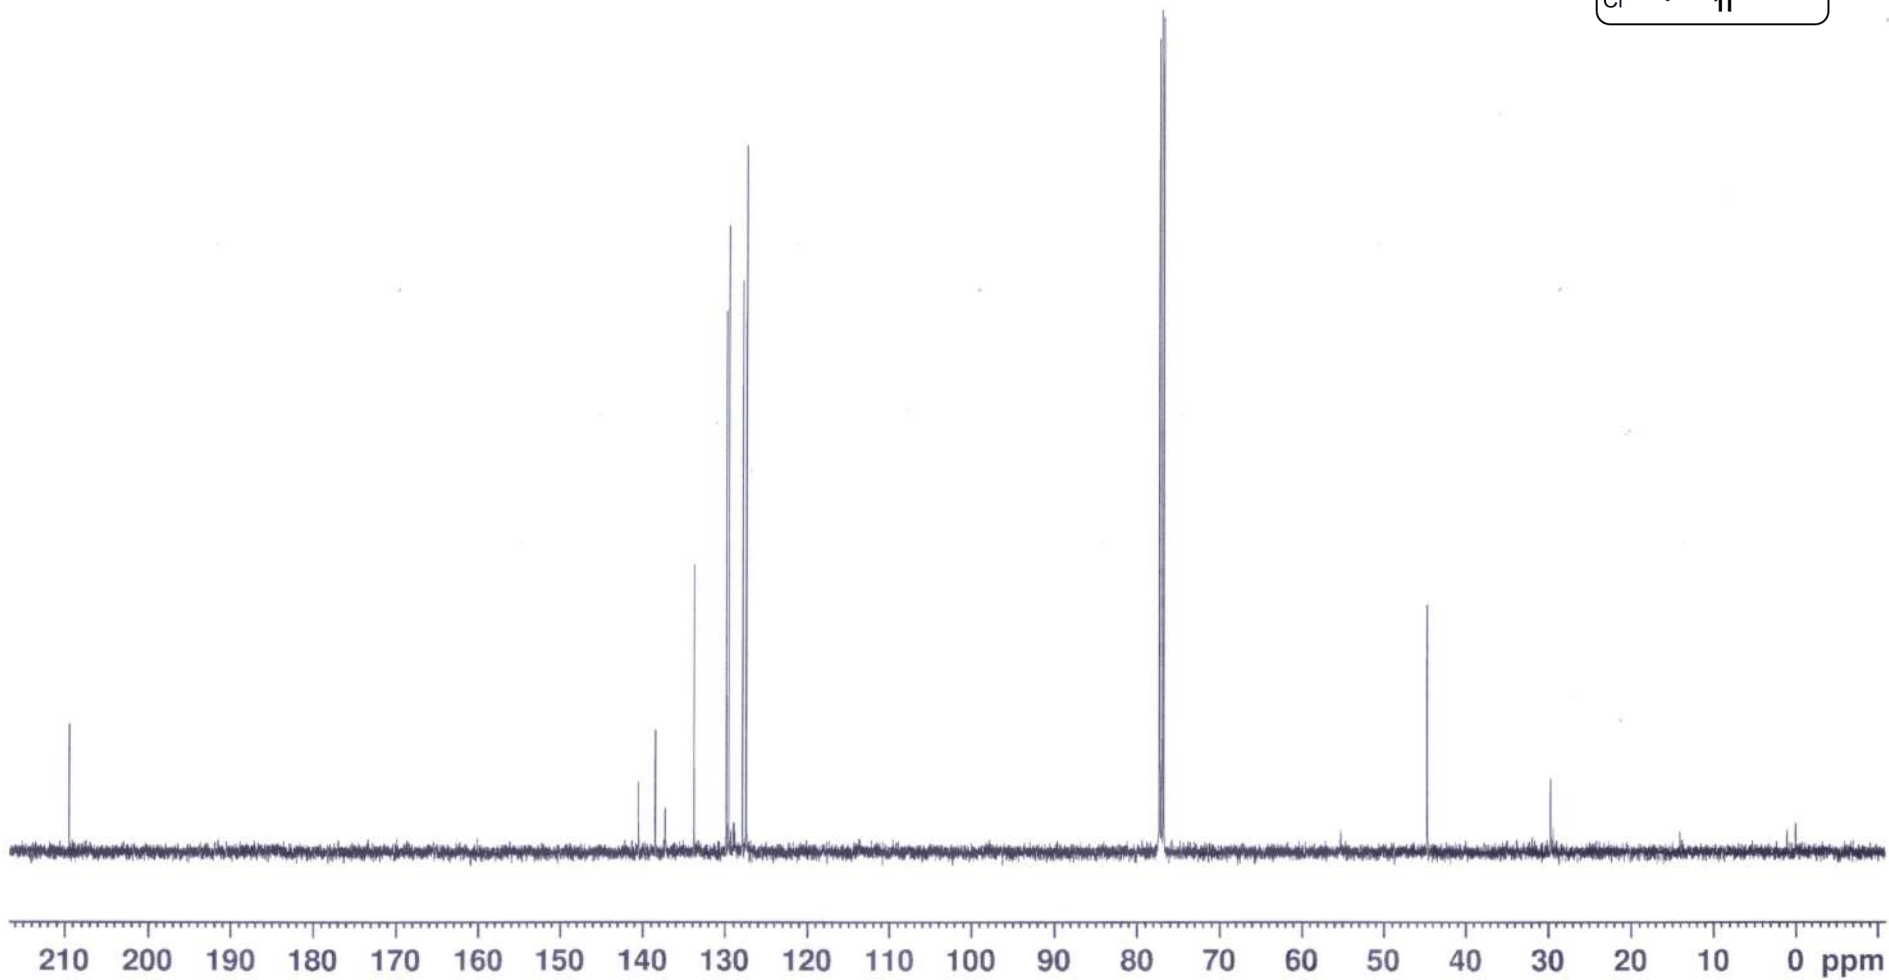

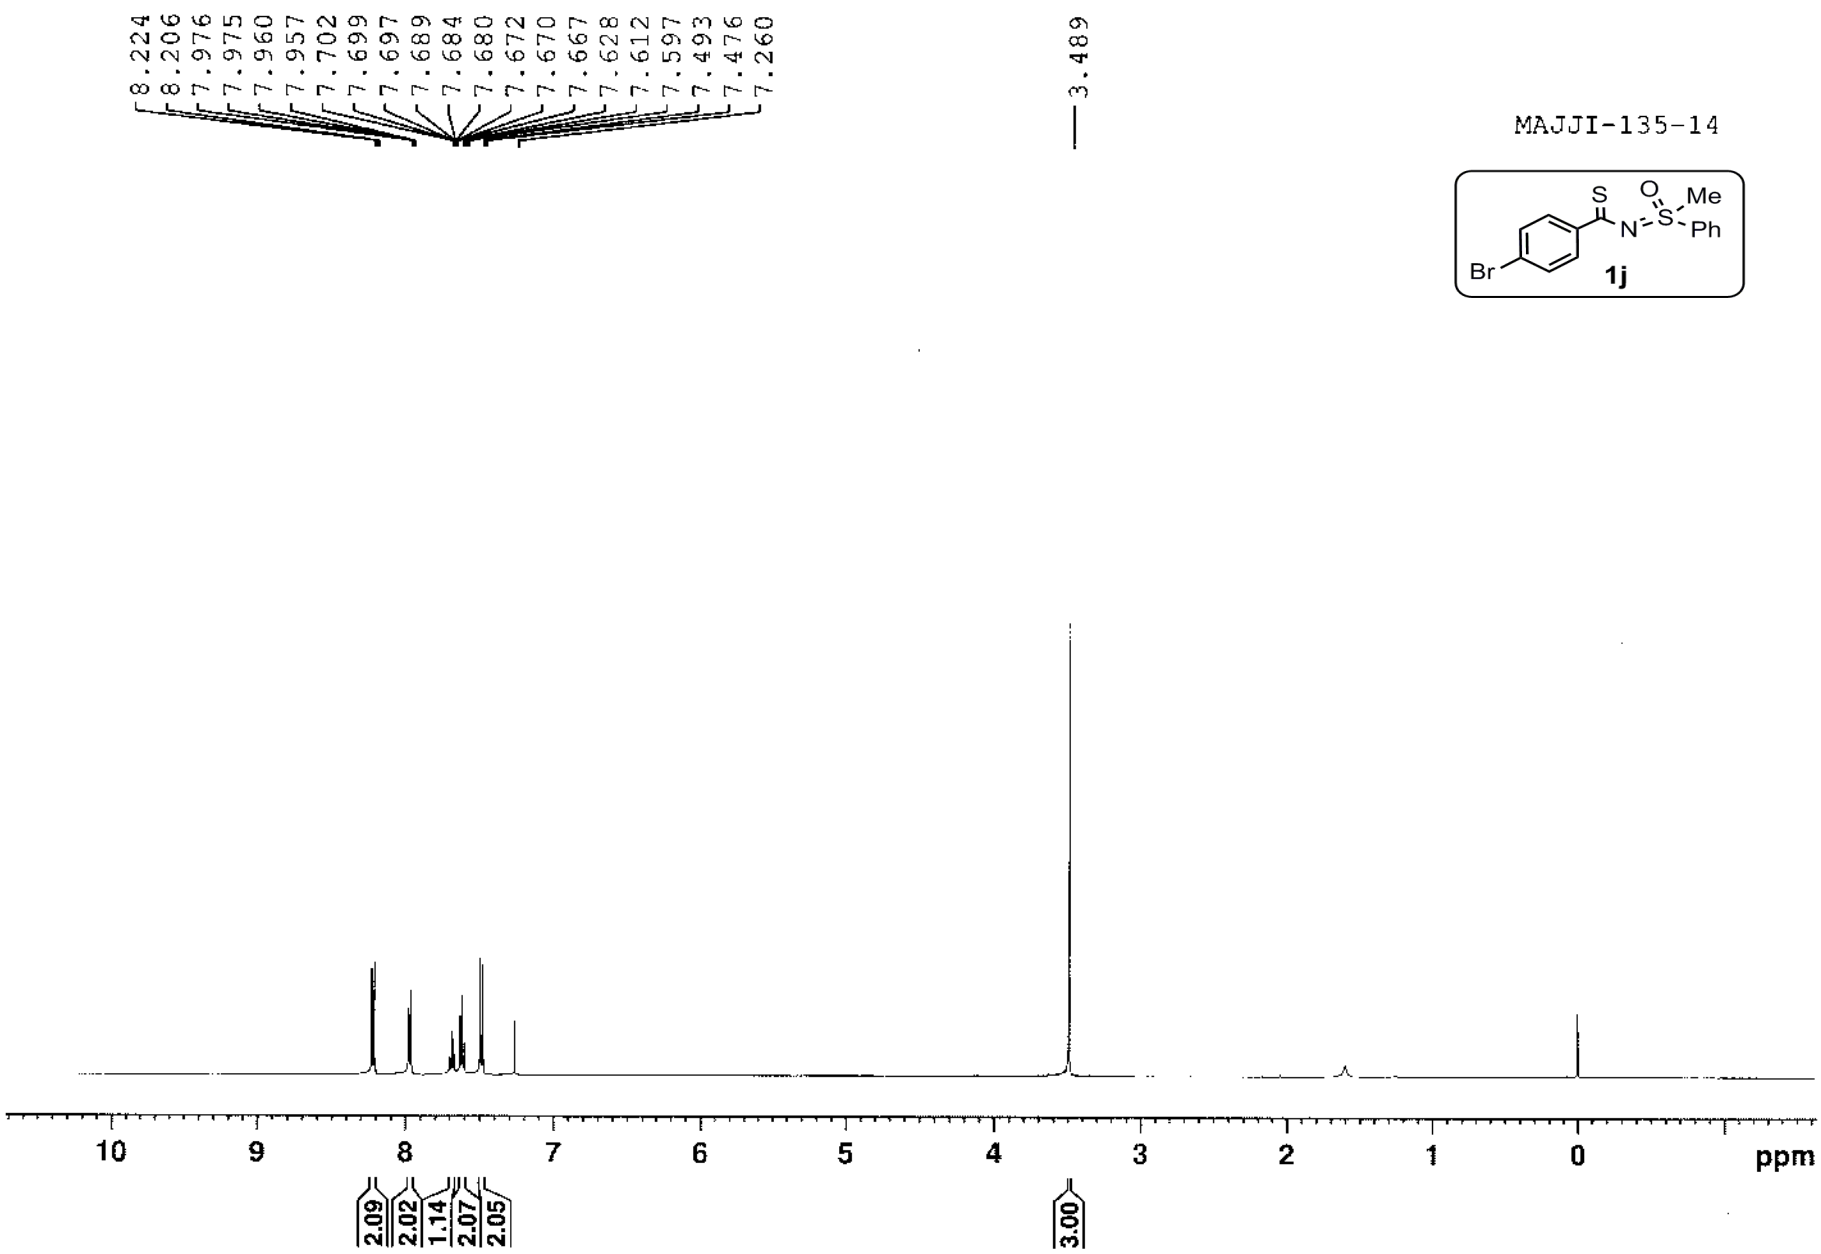

— 209.64

140.93  
137.19  
133.82  
130.85  
129.85  
129.72  
127.38  
127.24

77.25  
77.00  
76.74

— 44.69

MJ- 11-14

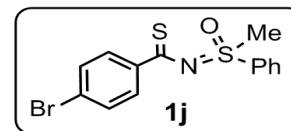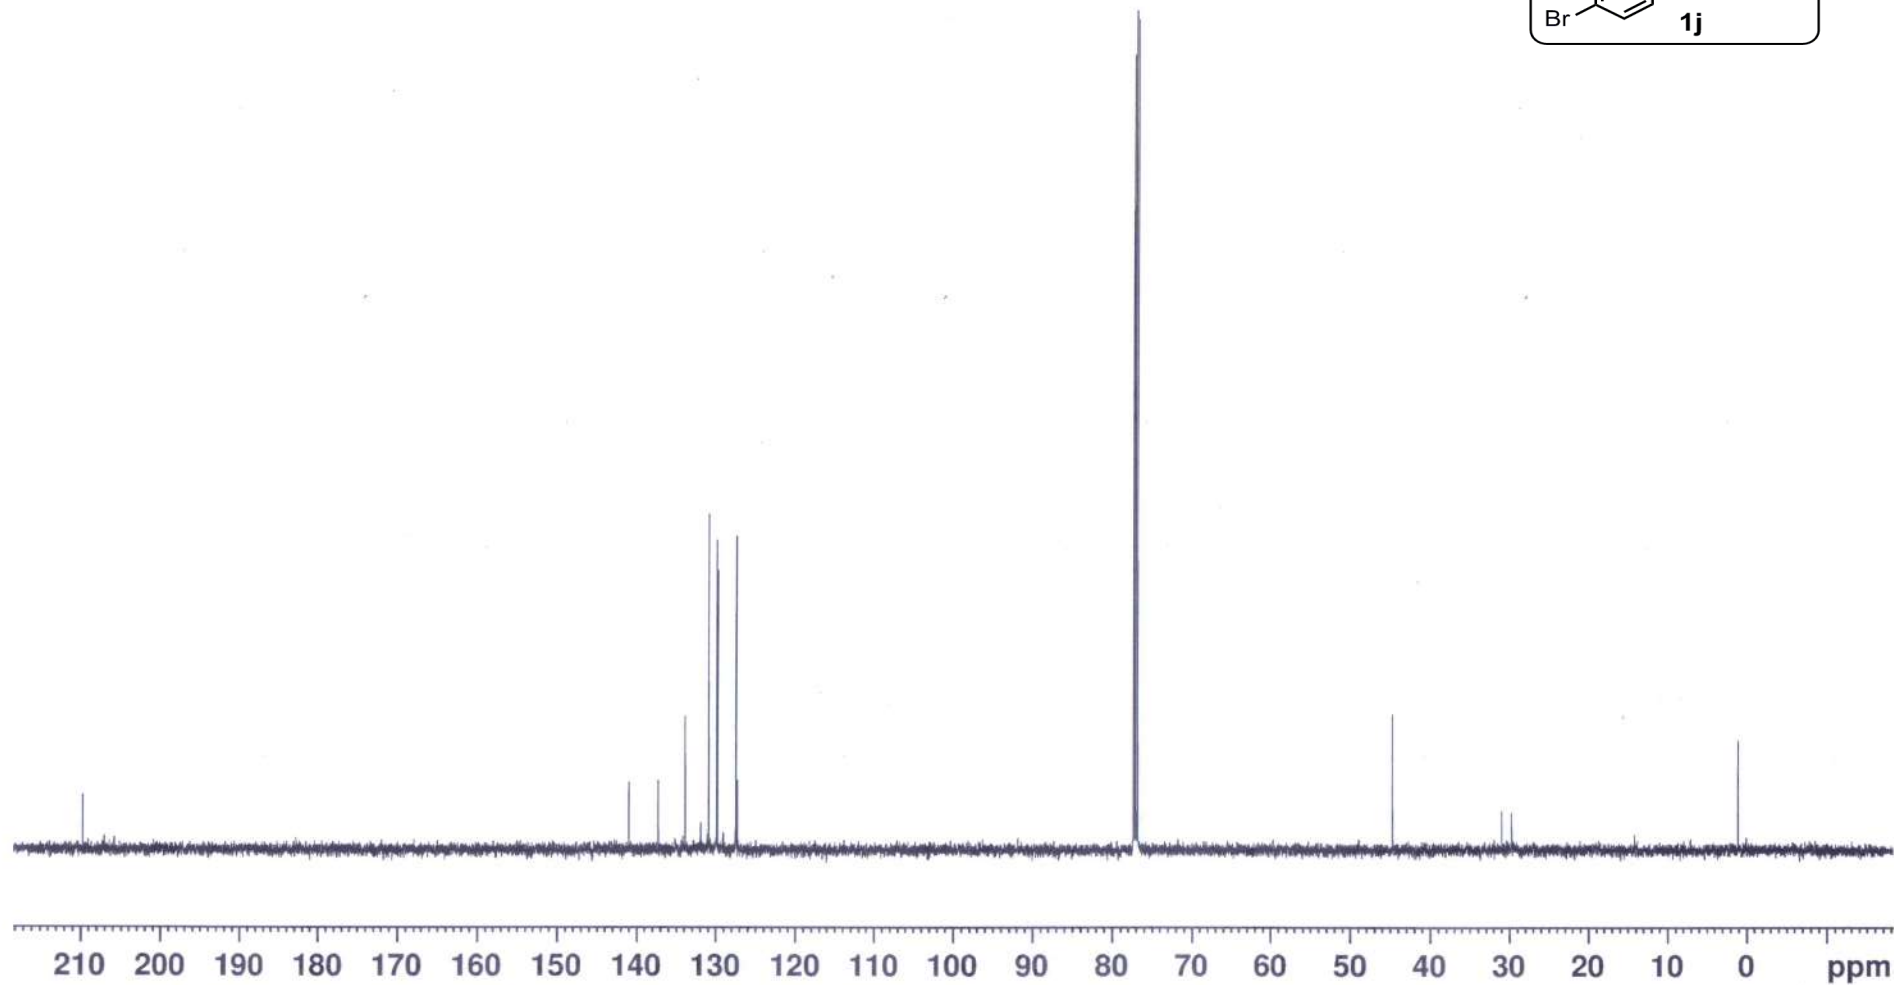

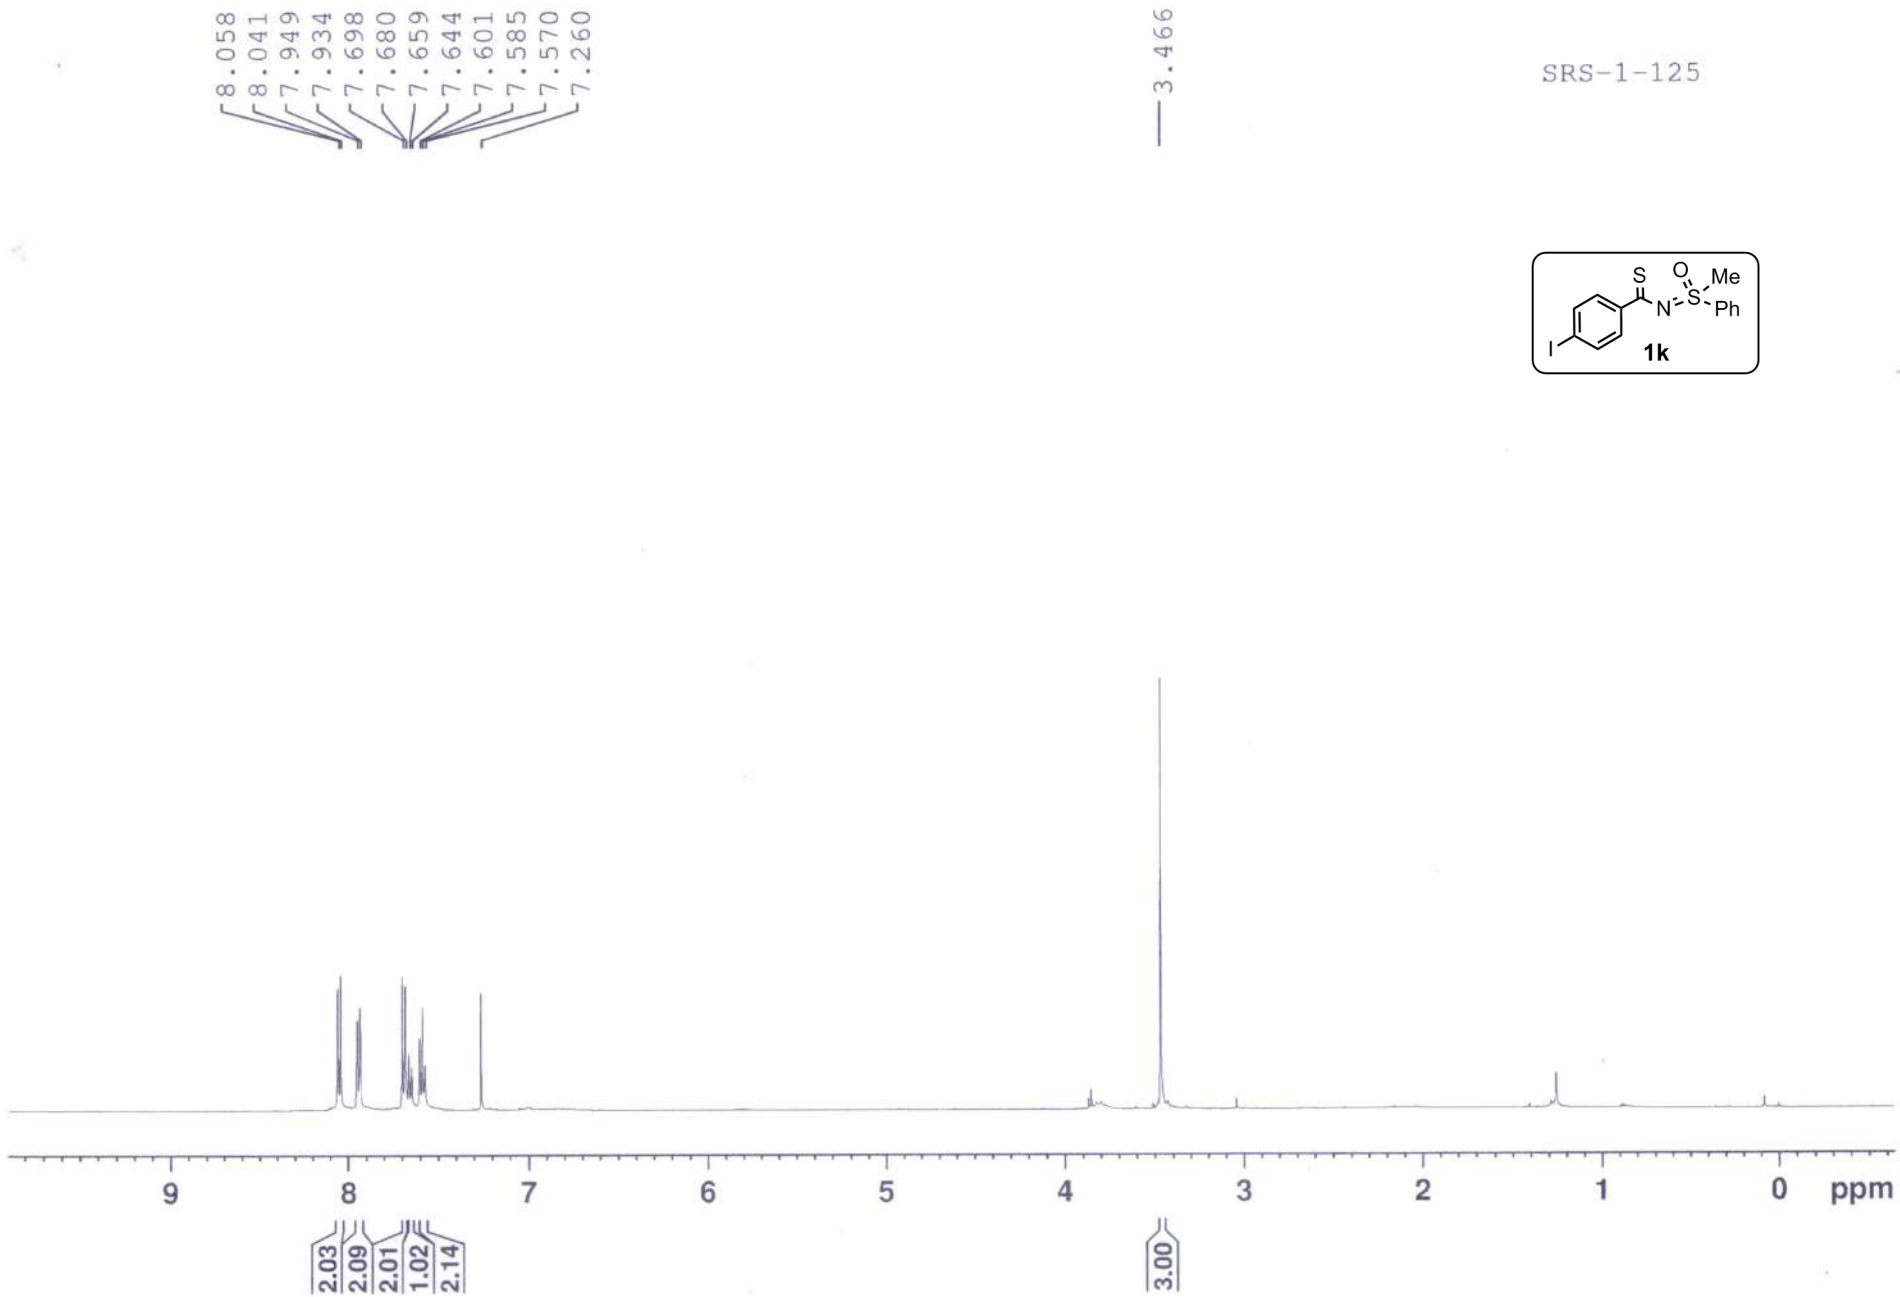

SRS-1-125

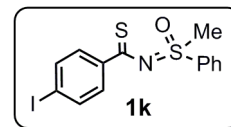

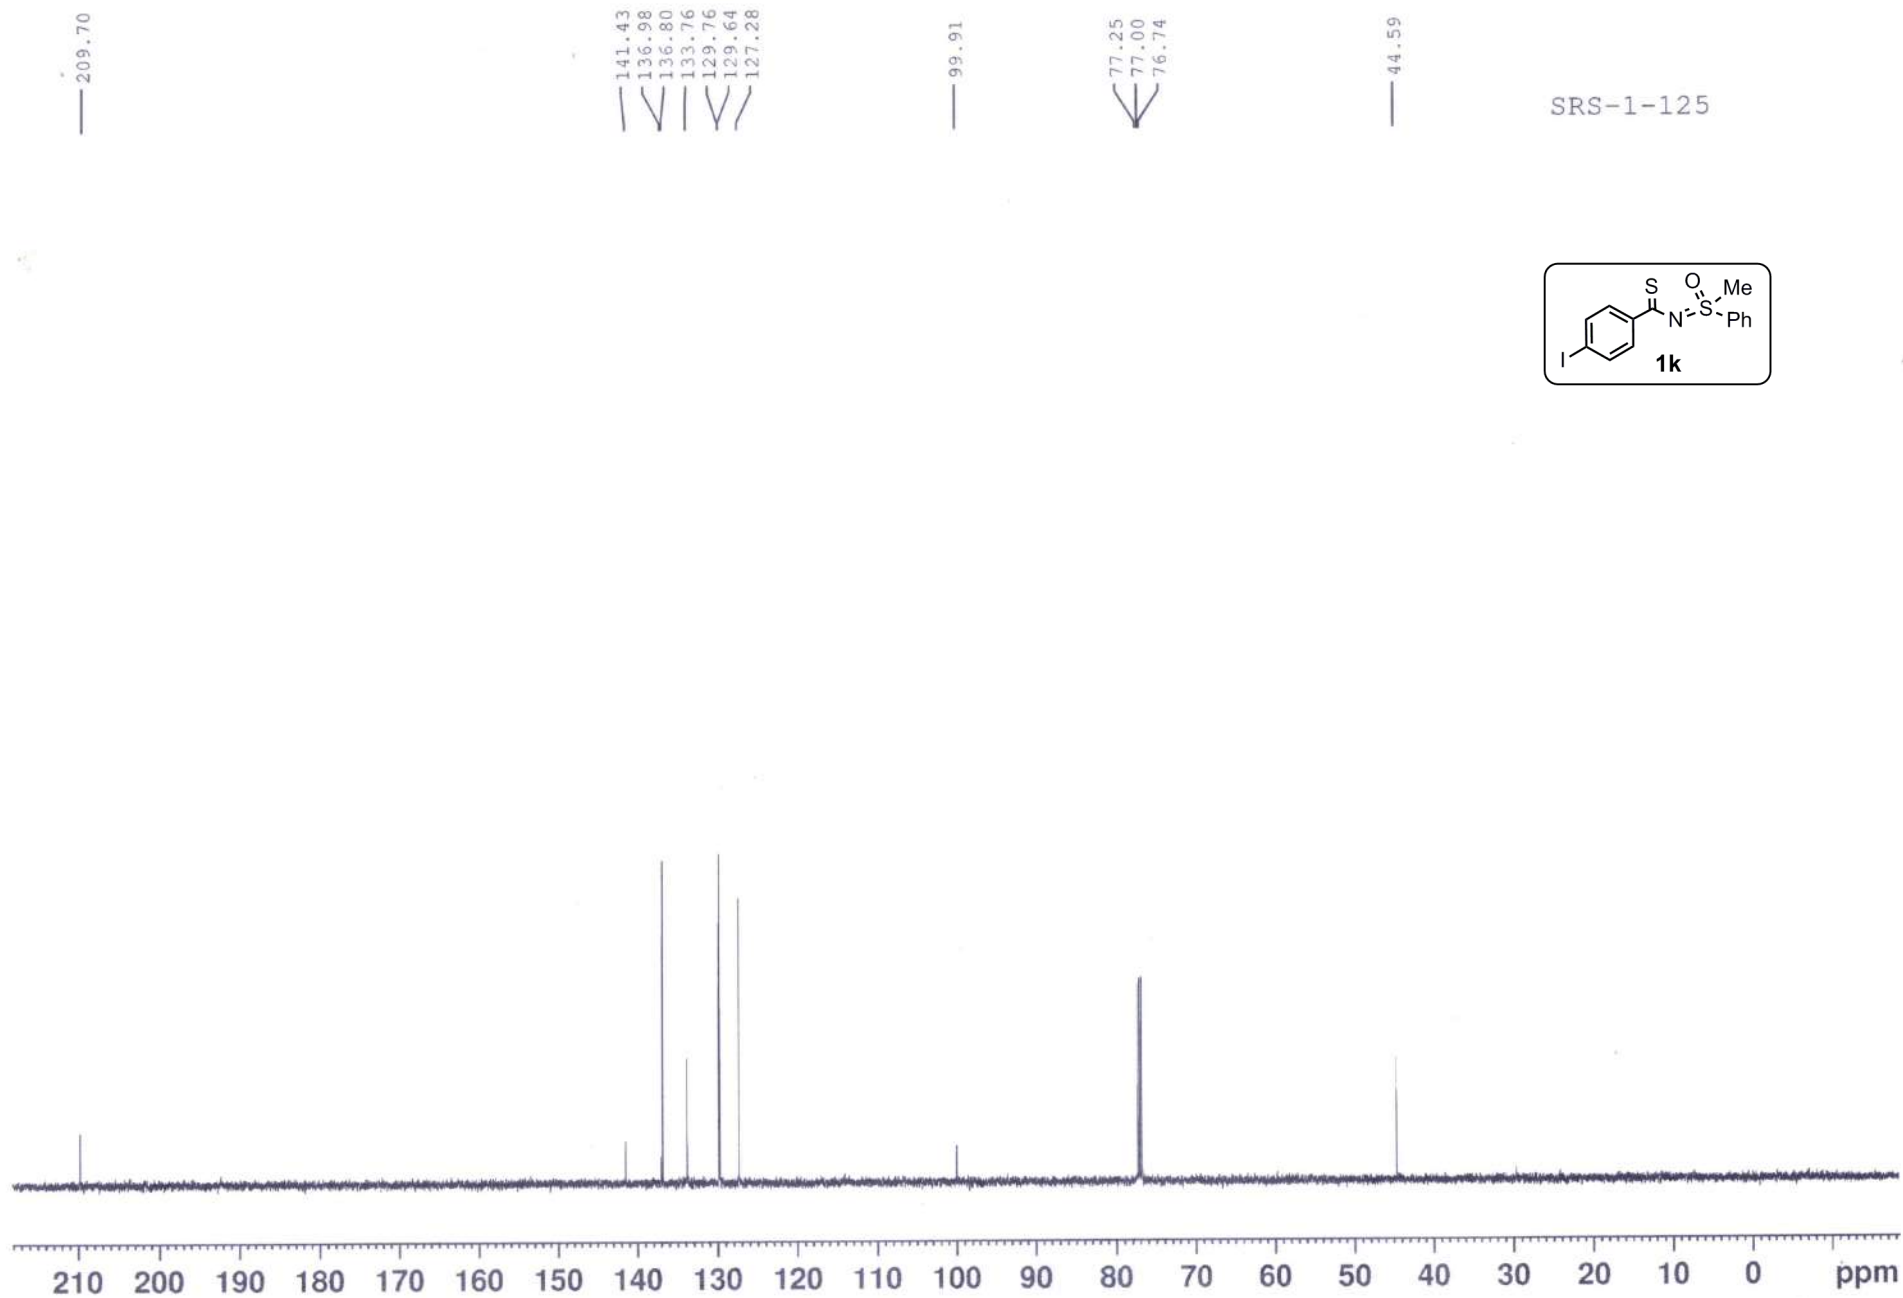

8.448  
8.431  
8.013  
7.998  
7.691  
7.677  
7.662  
7.648  
7.634  
7.625  
7.610  
7.594  
7.478  
7.463  
7.447  
7.400  
7.385  
7.371  
7.260

— 3.506

MJ-48-15

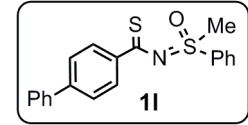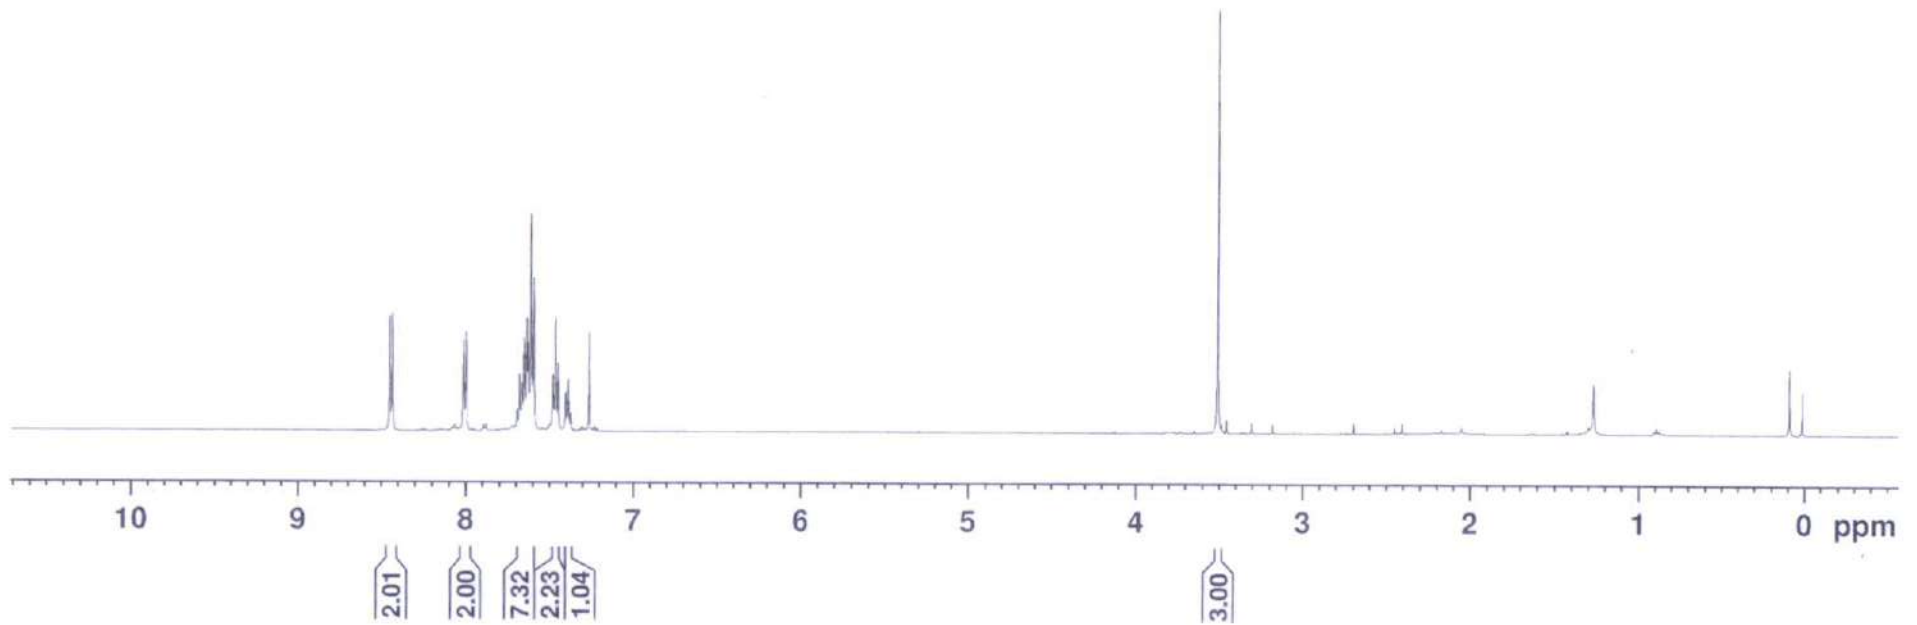



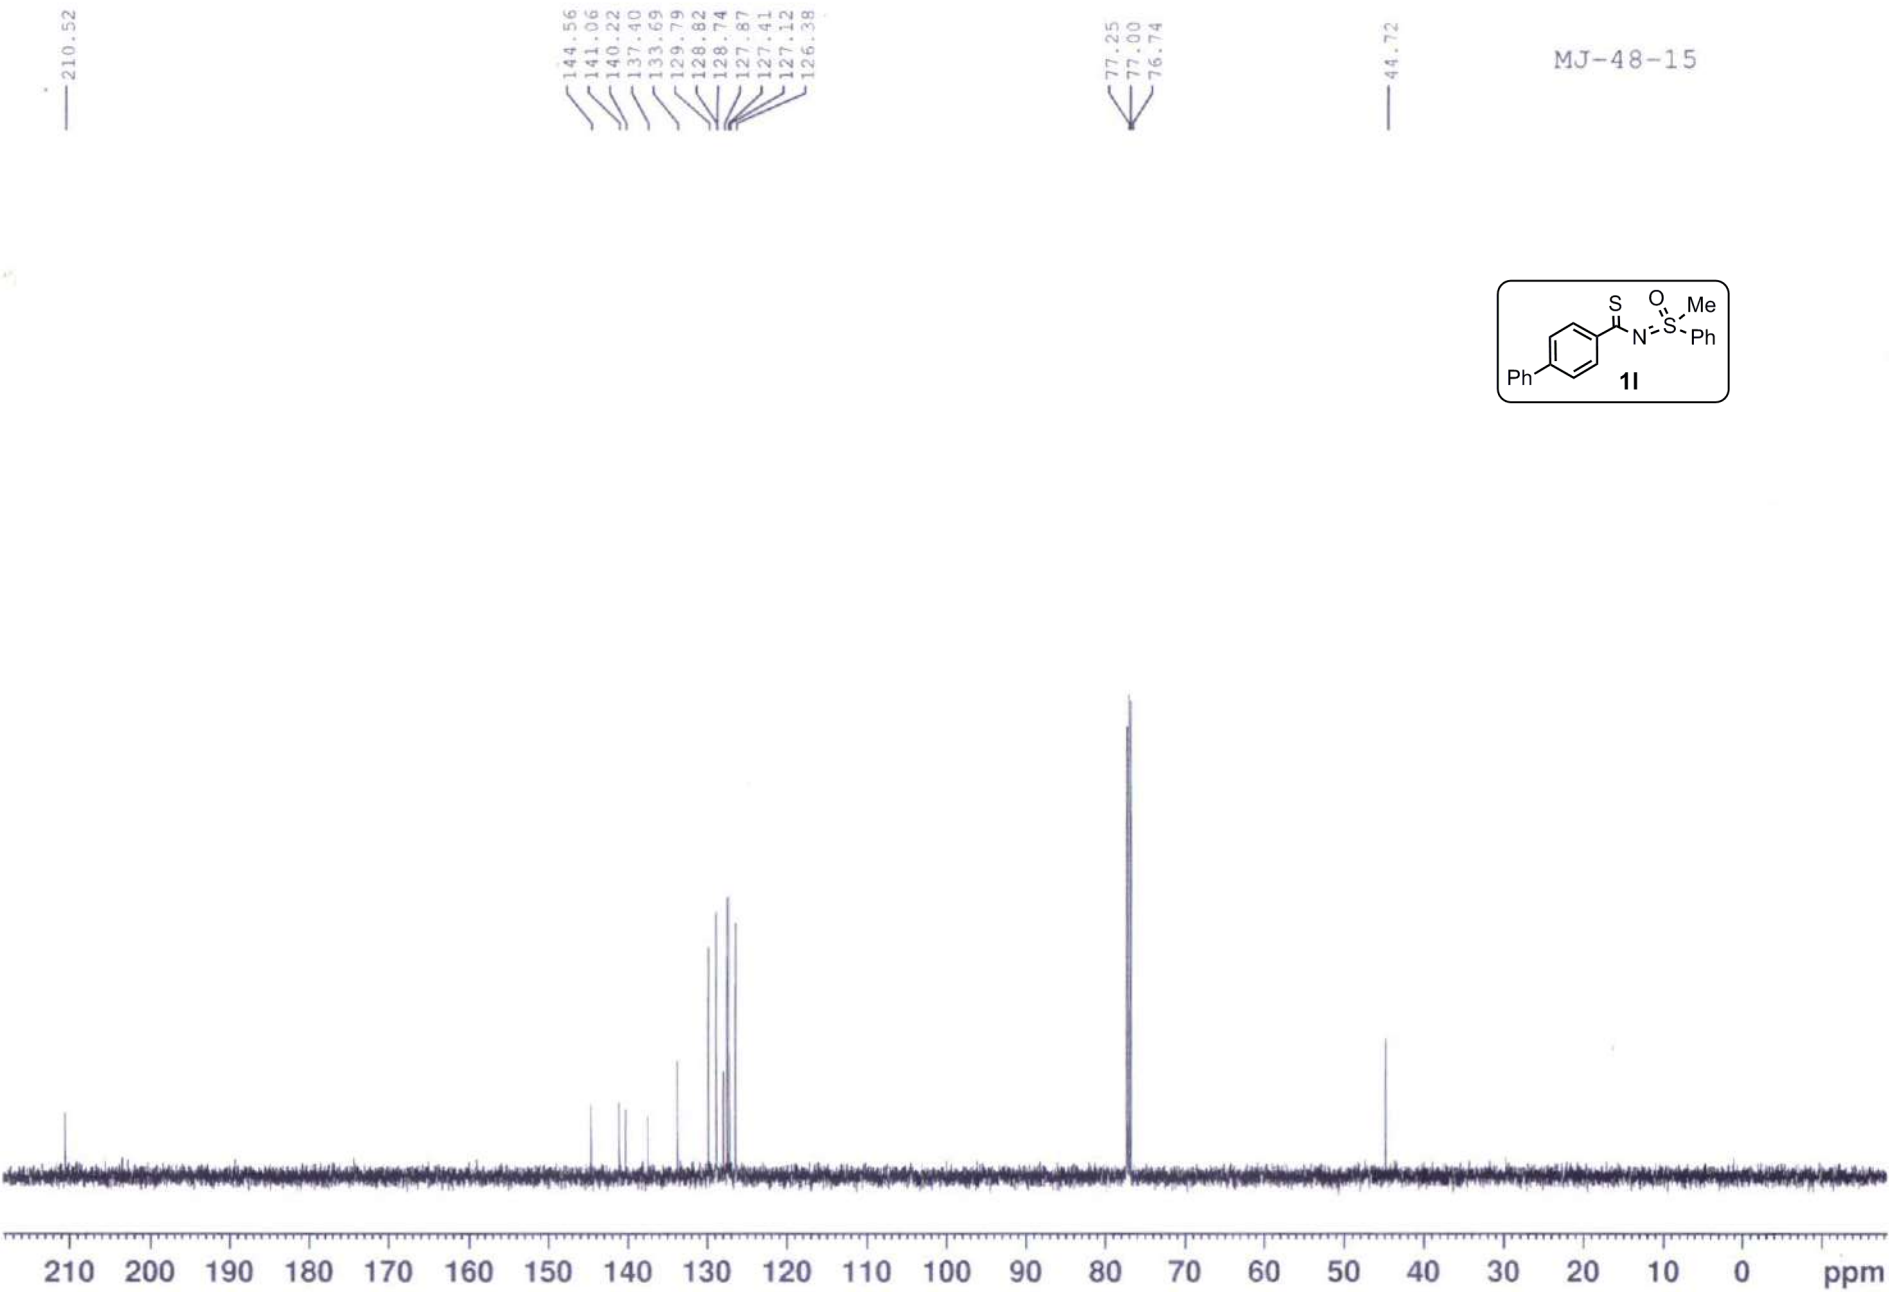

MJ-48-15

SRS-1-94-1

8.421  
8.405  
7.980  
7.965  
7.962  
7.704  
7.689  
7.674  
7.630  
7.613  
7.596  
7.260

— 3.503

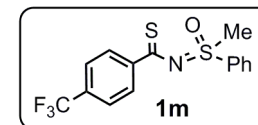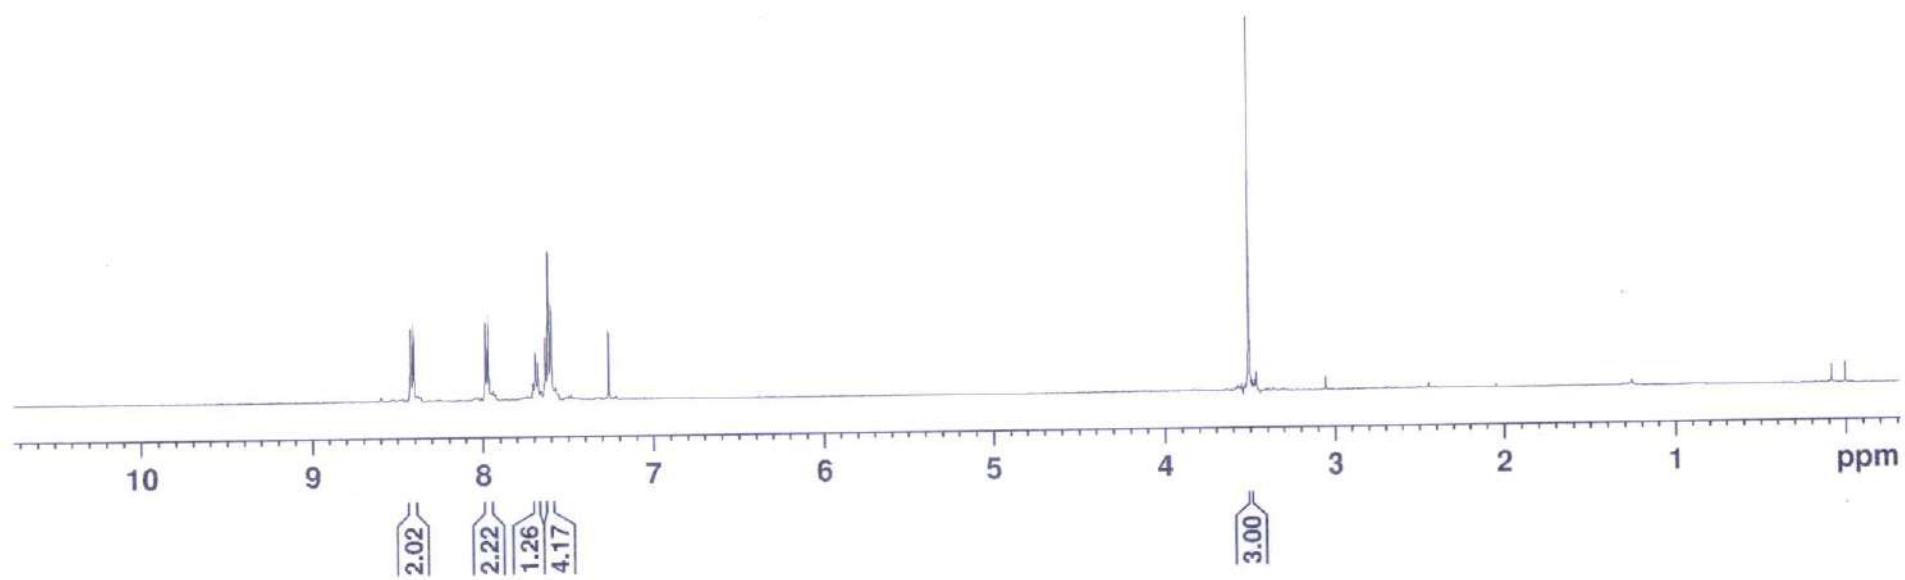

SRS-1-94-1

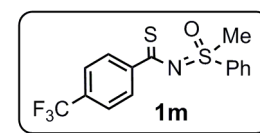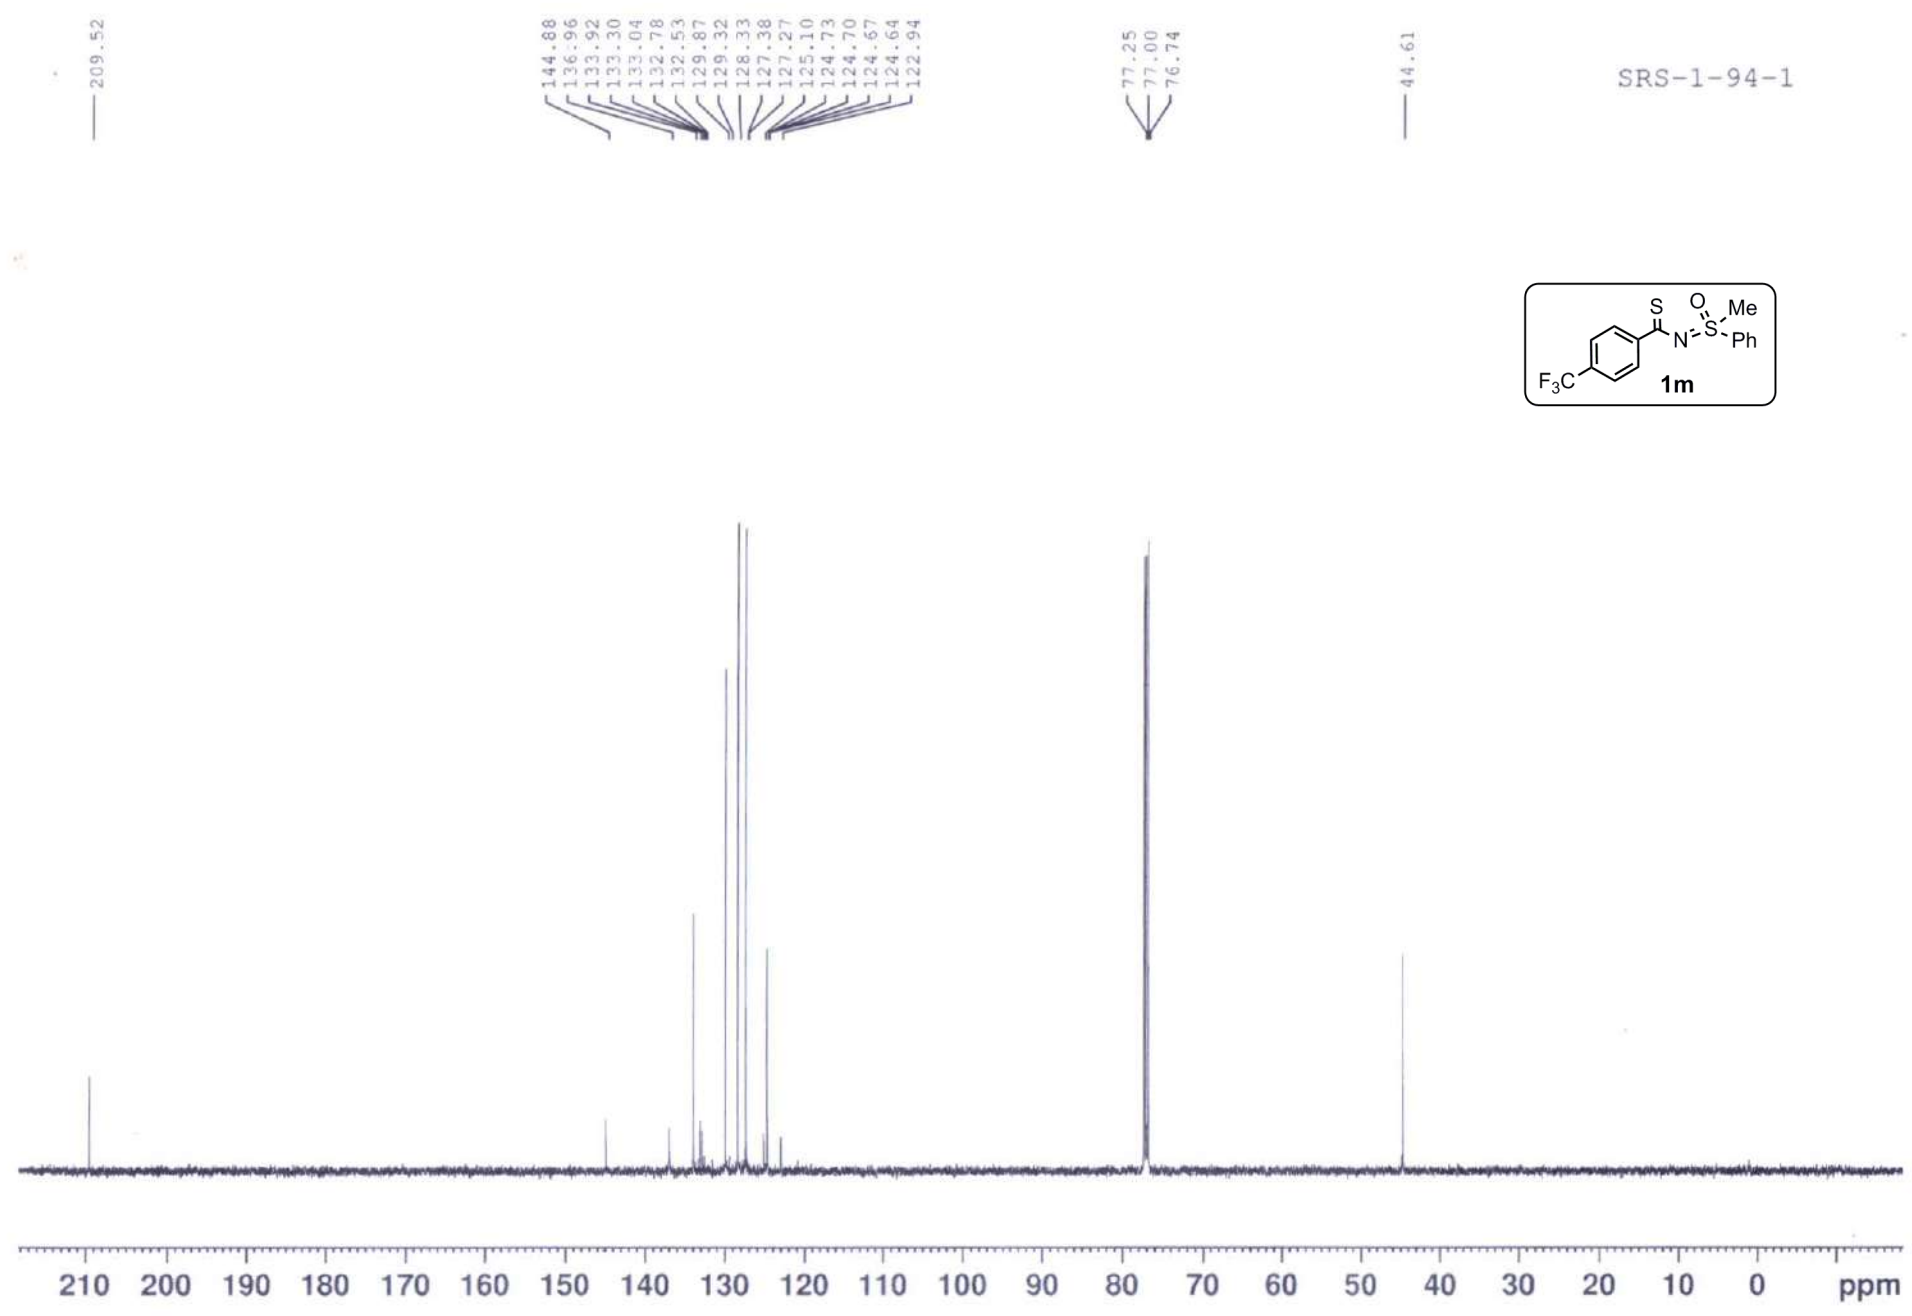

SRS-1-94-1

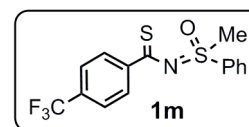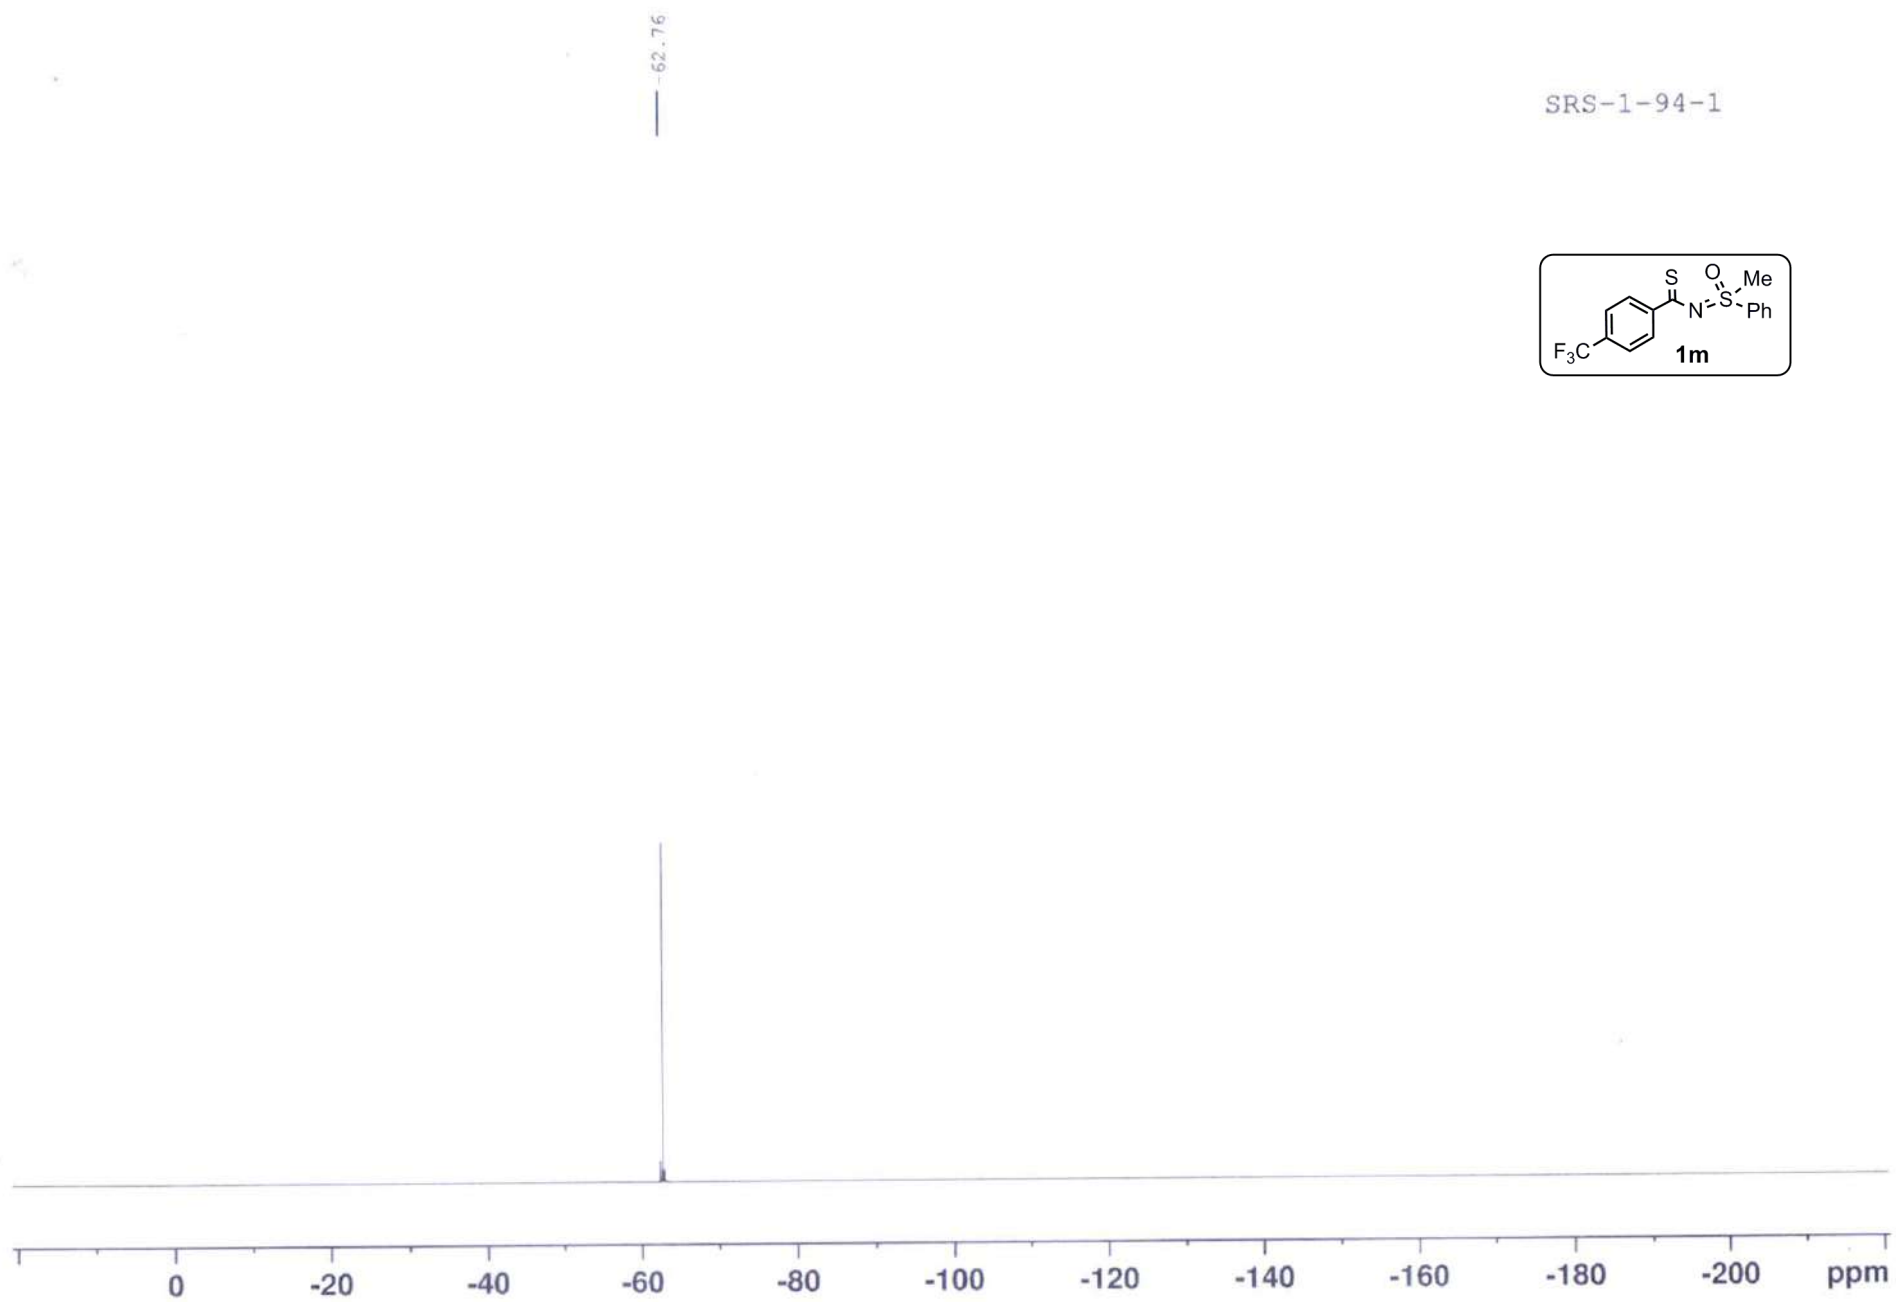

MJ-25-15

8.444  
8.426  
8.181  
8.163  
7.984  
7.969  
7.724  
7.710  
7.695  
7.650  
7.633  
7.619  
7.260

— 3.523

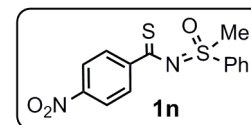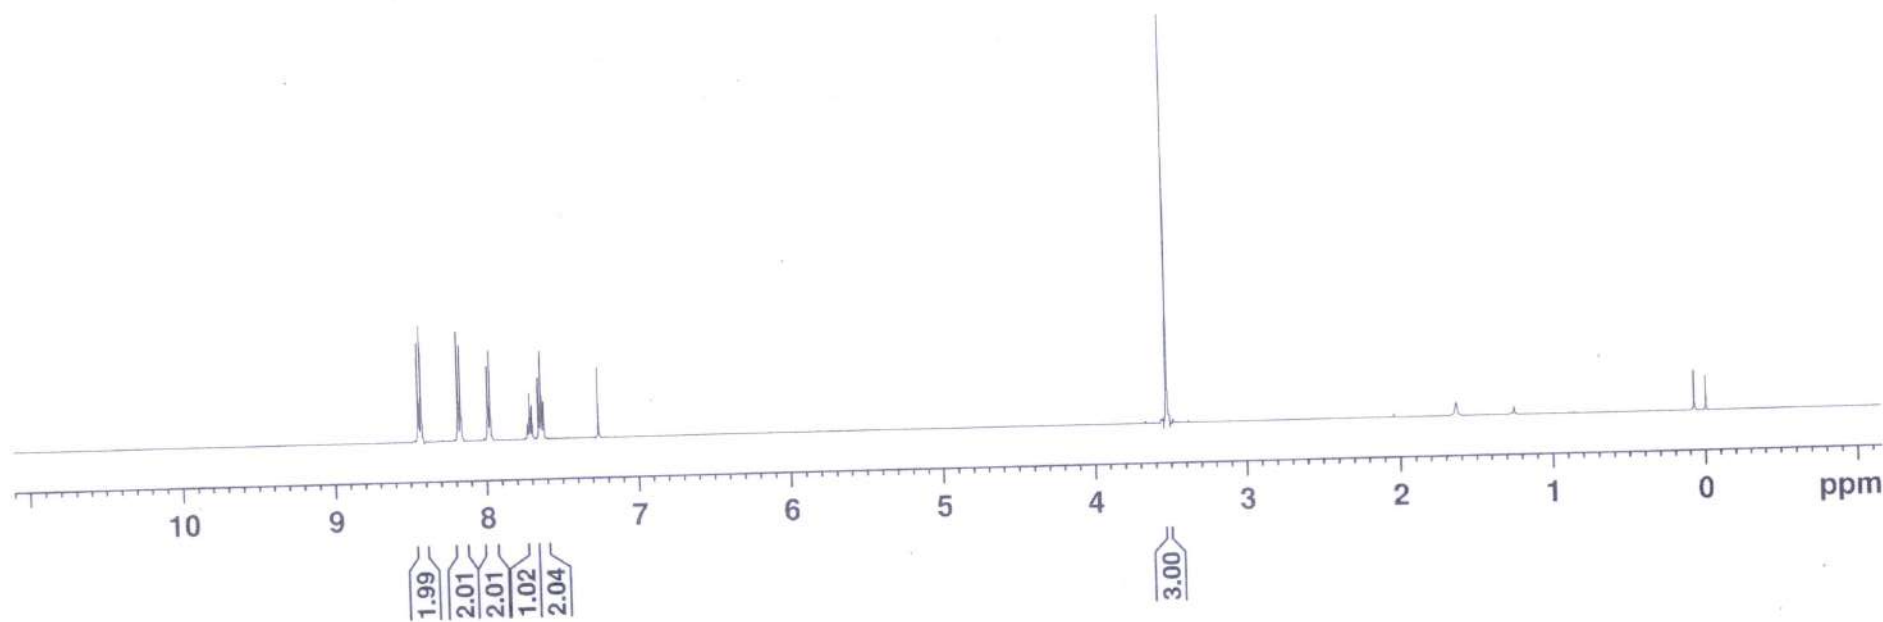

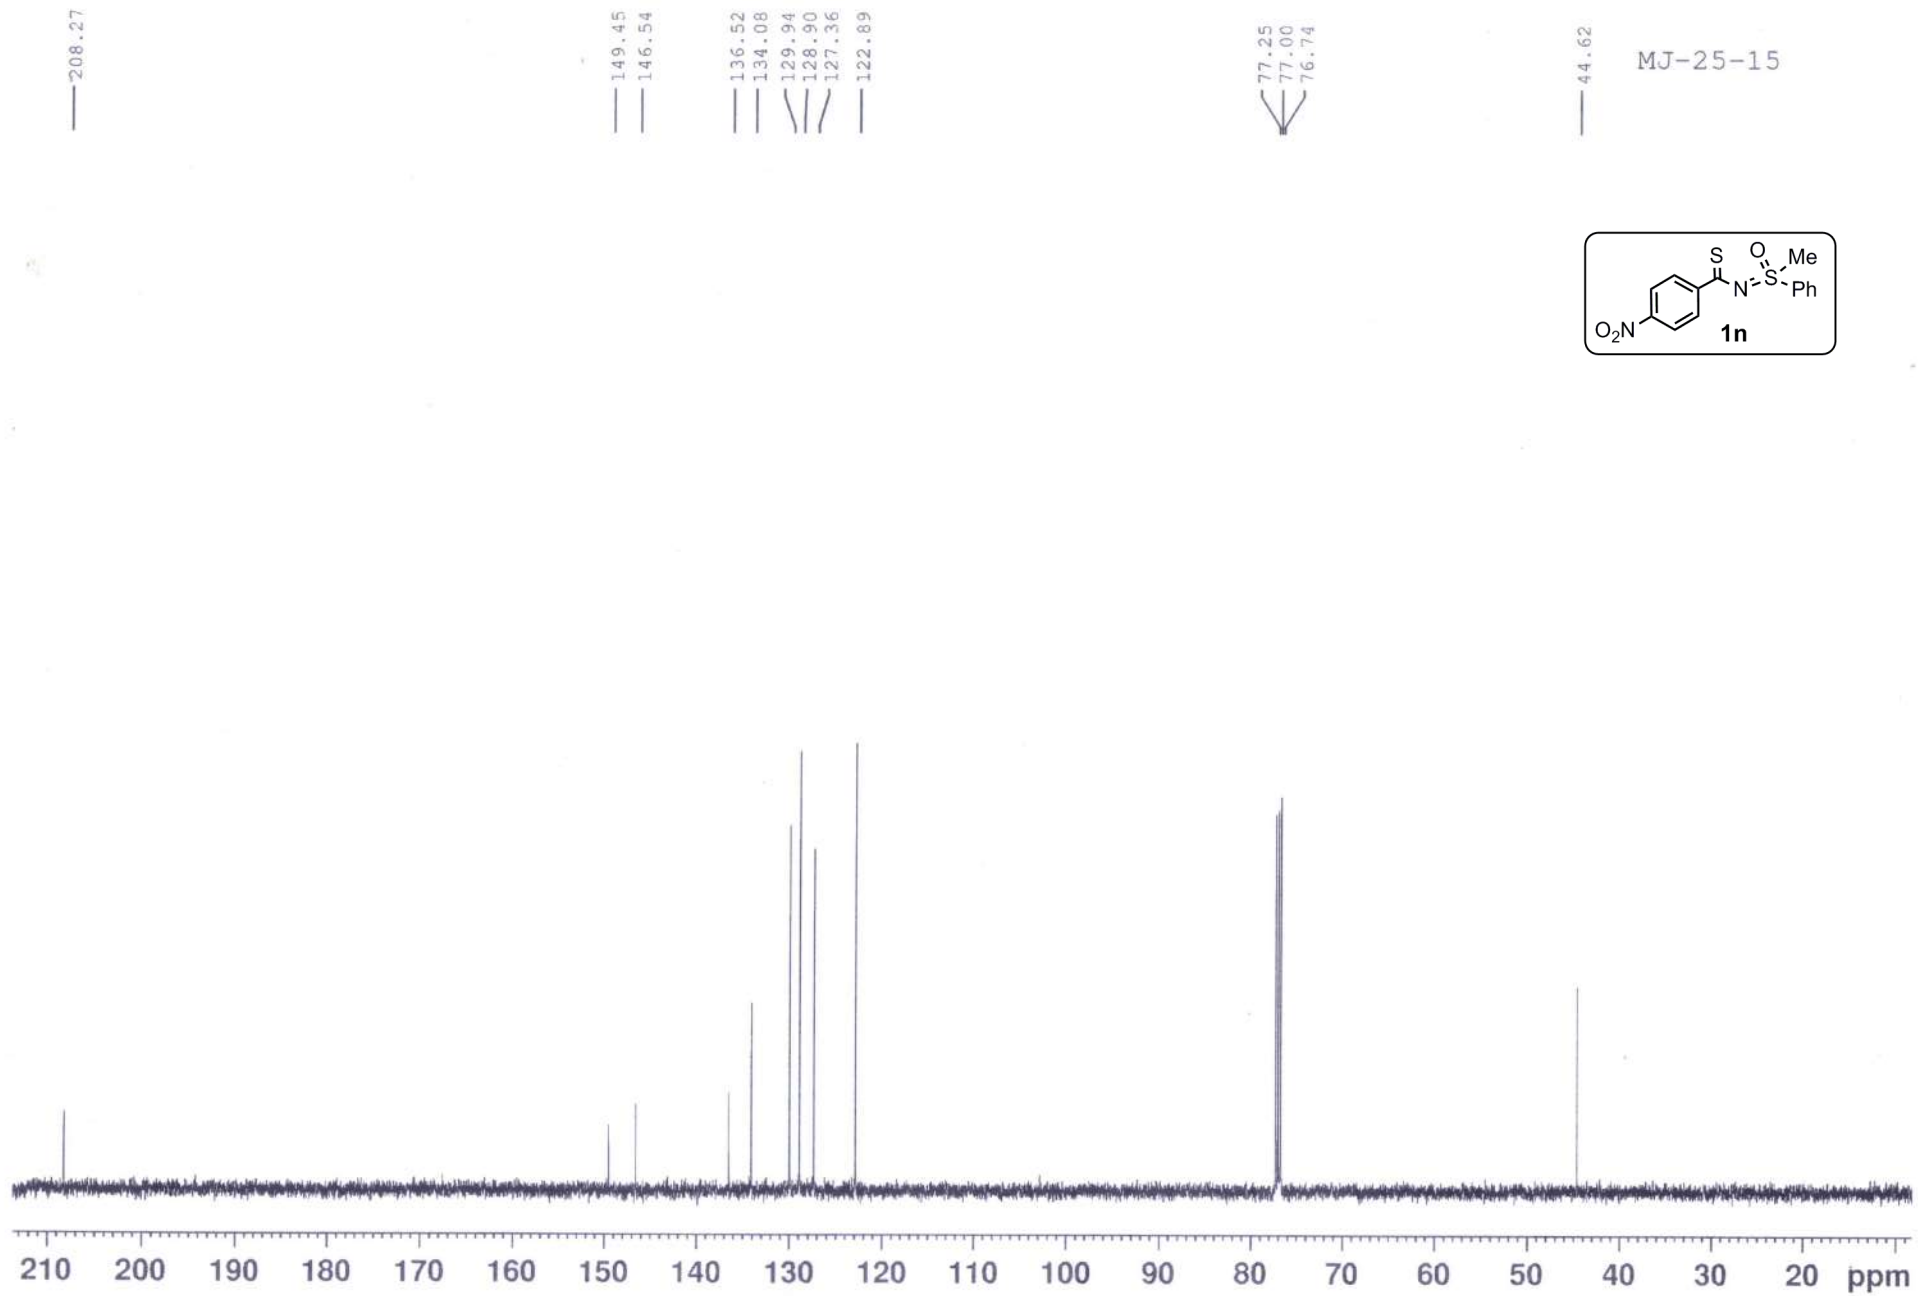

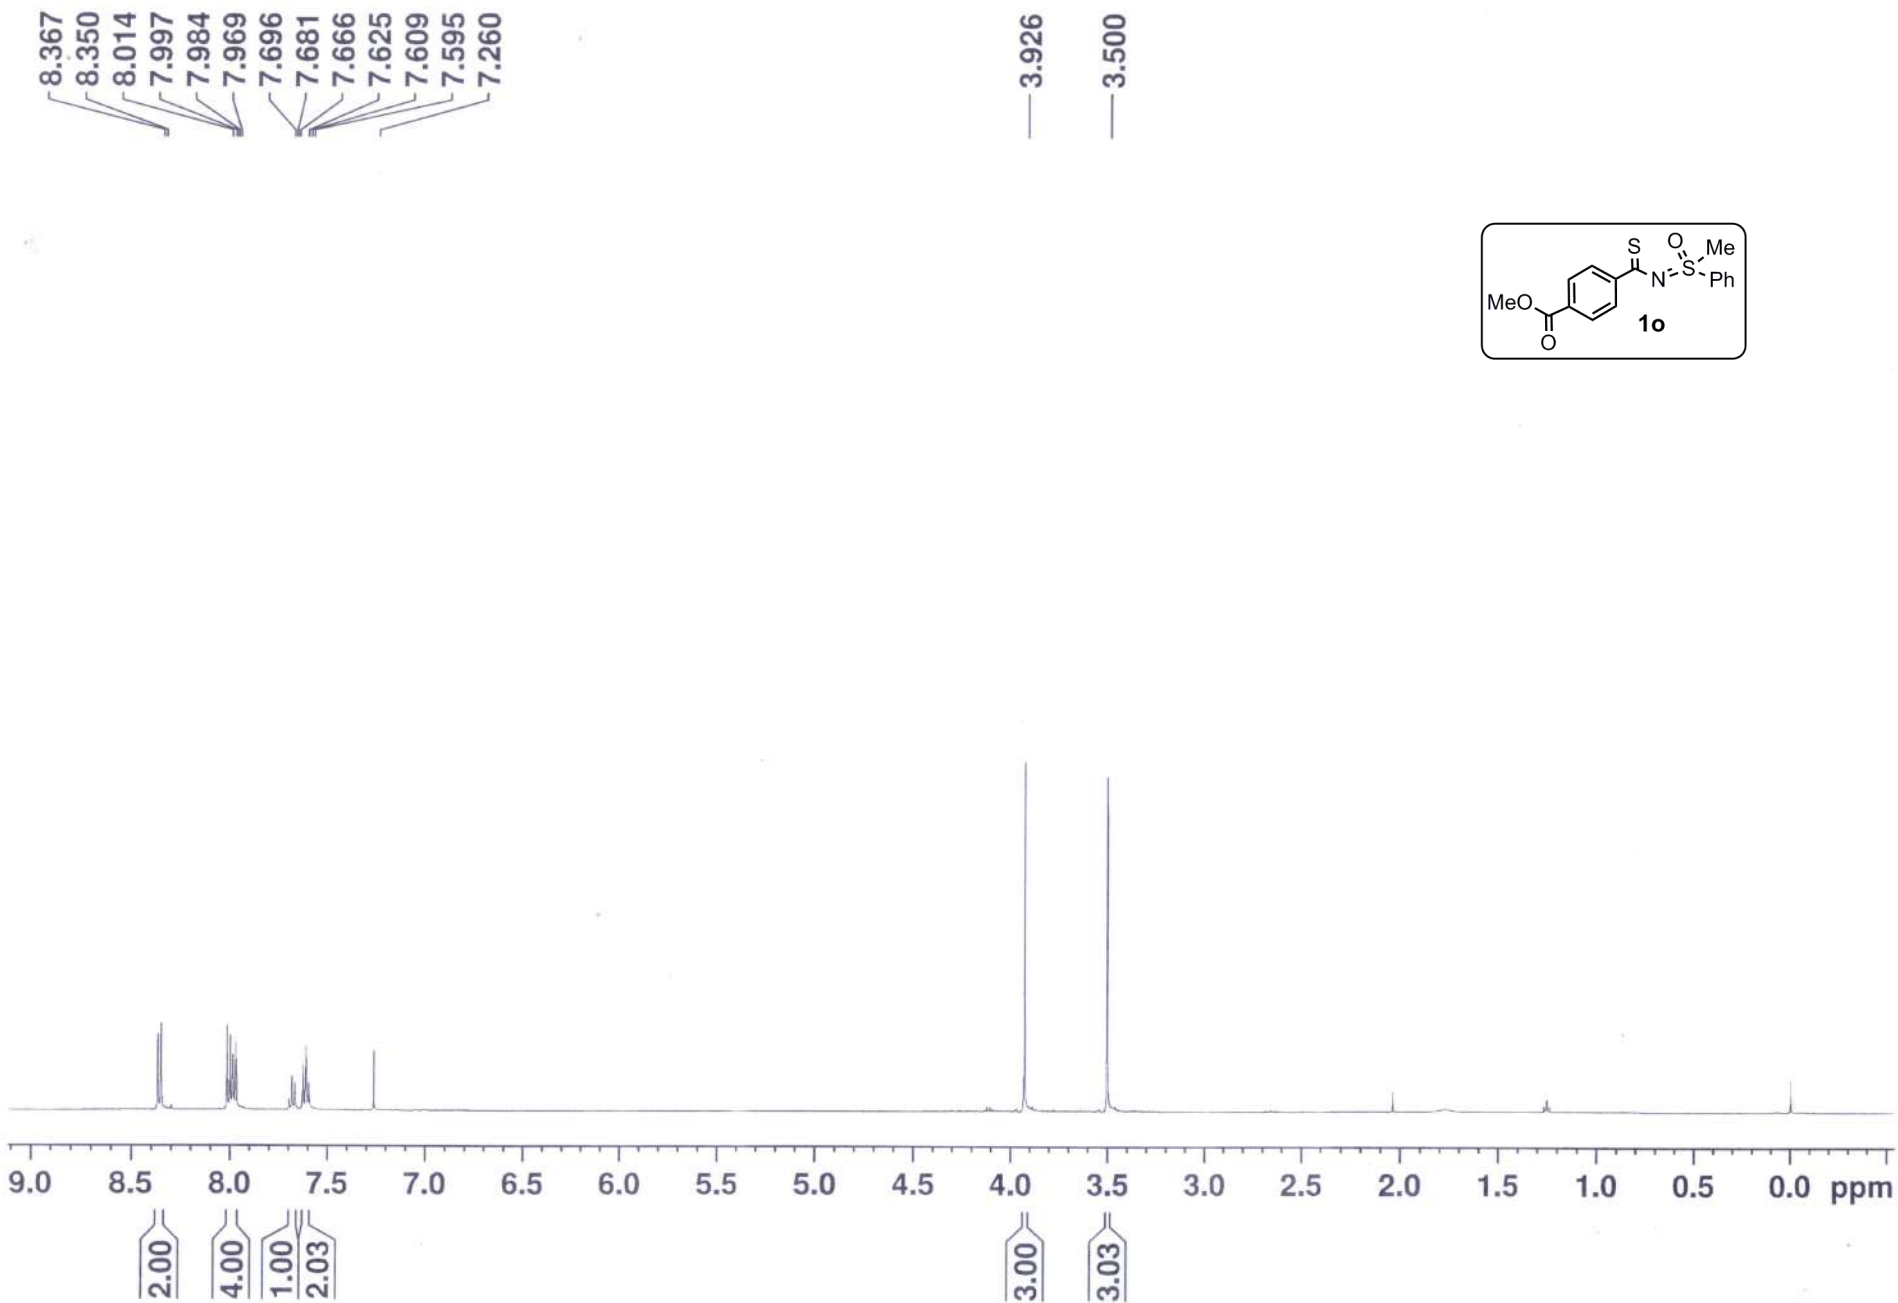

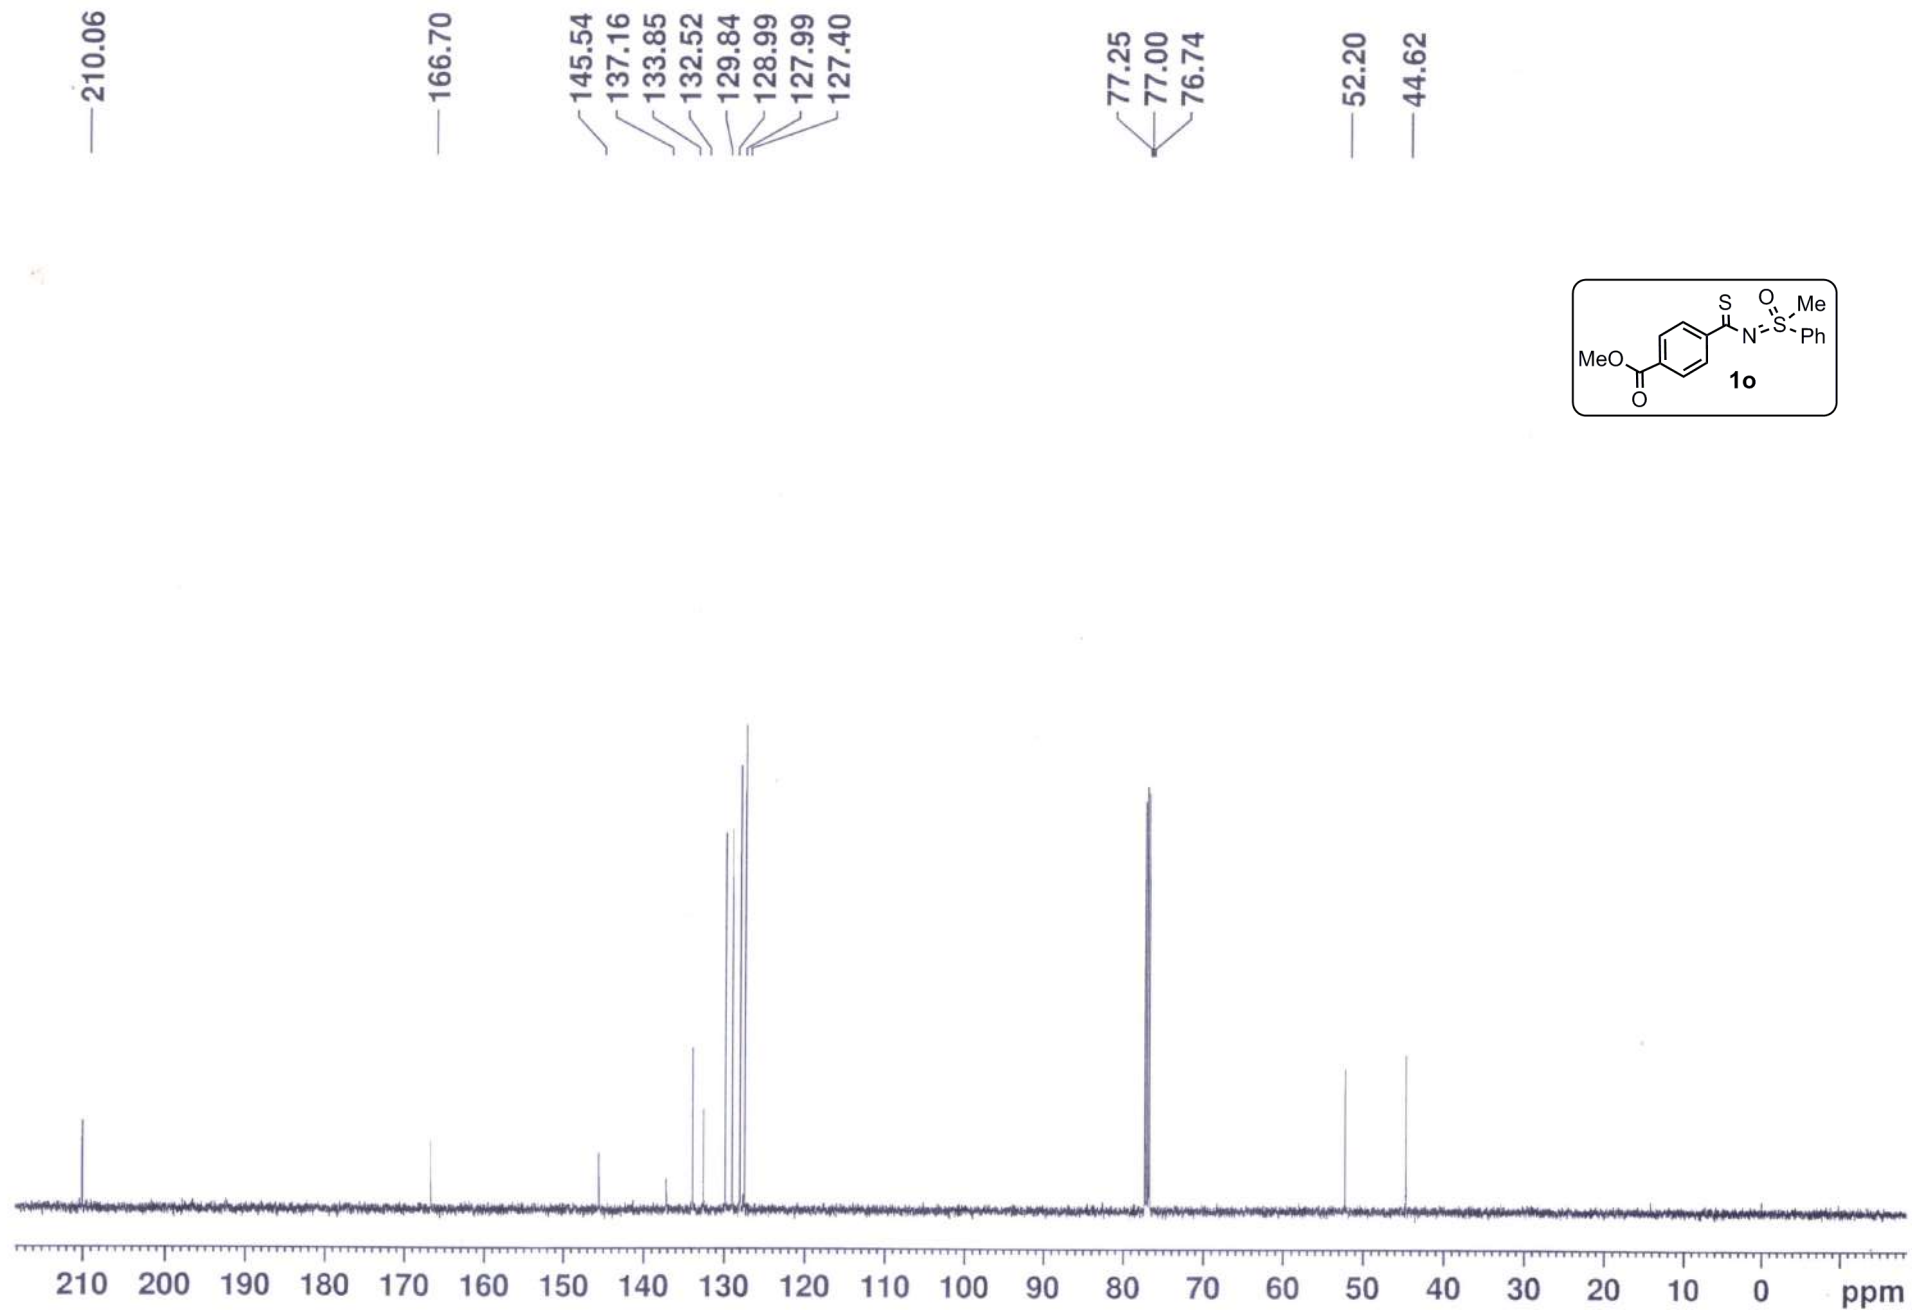



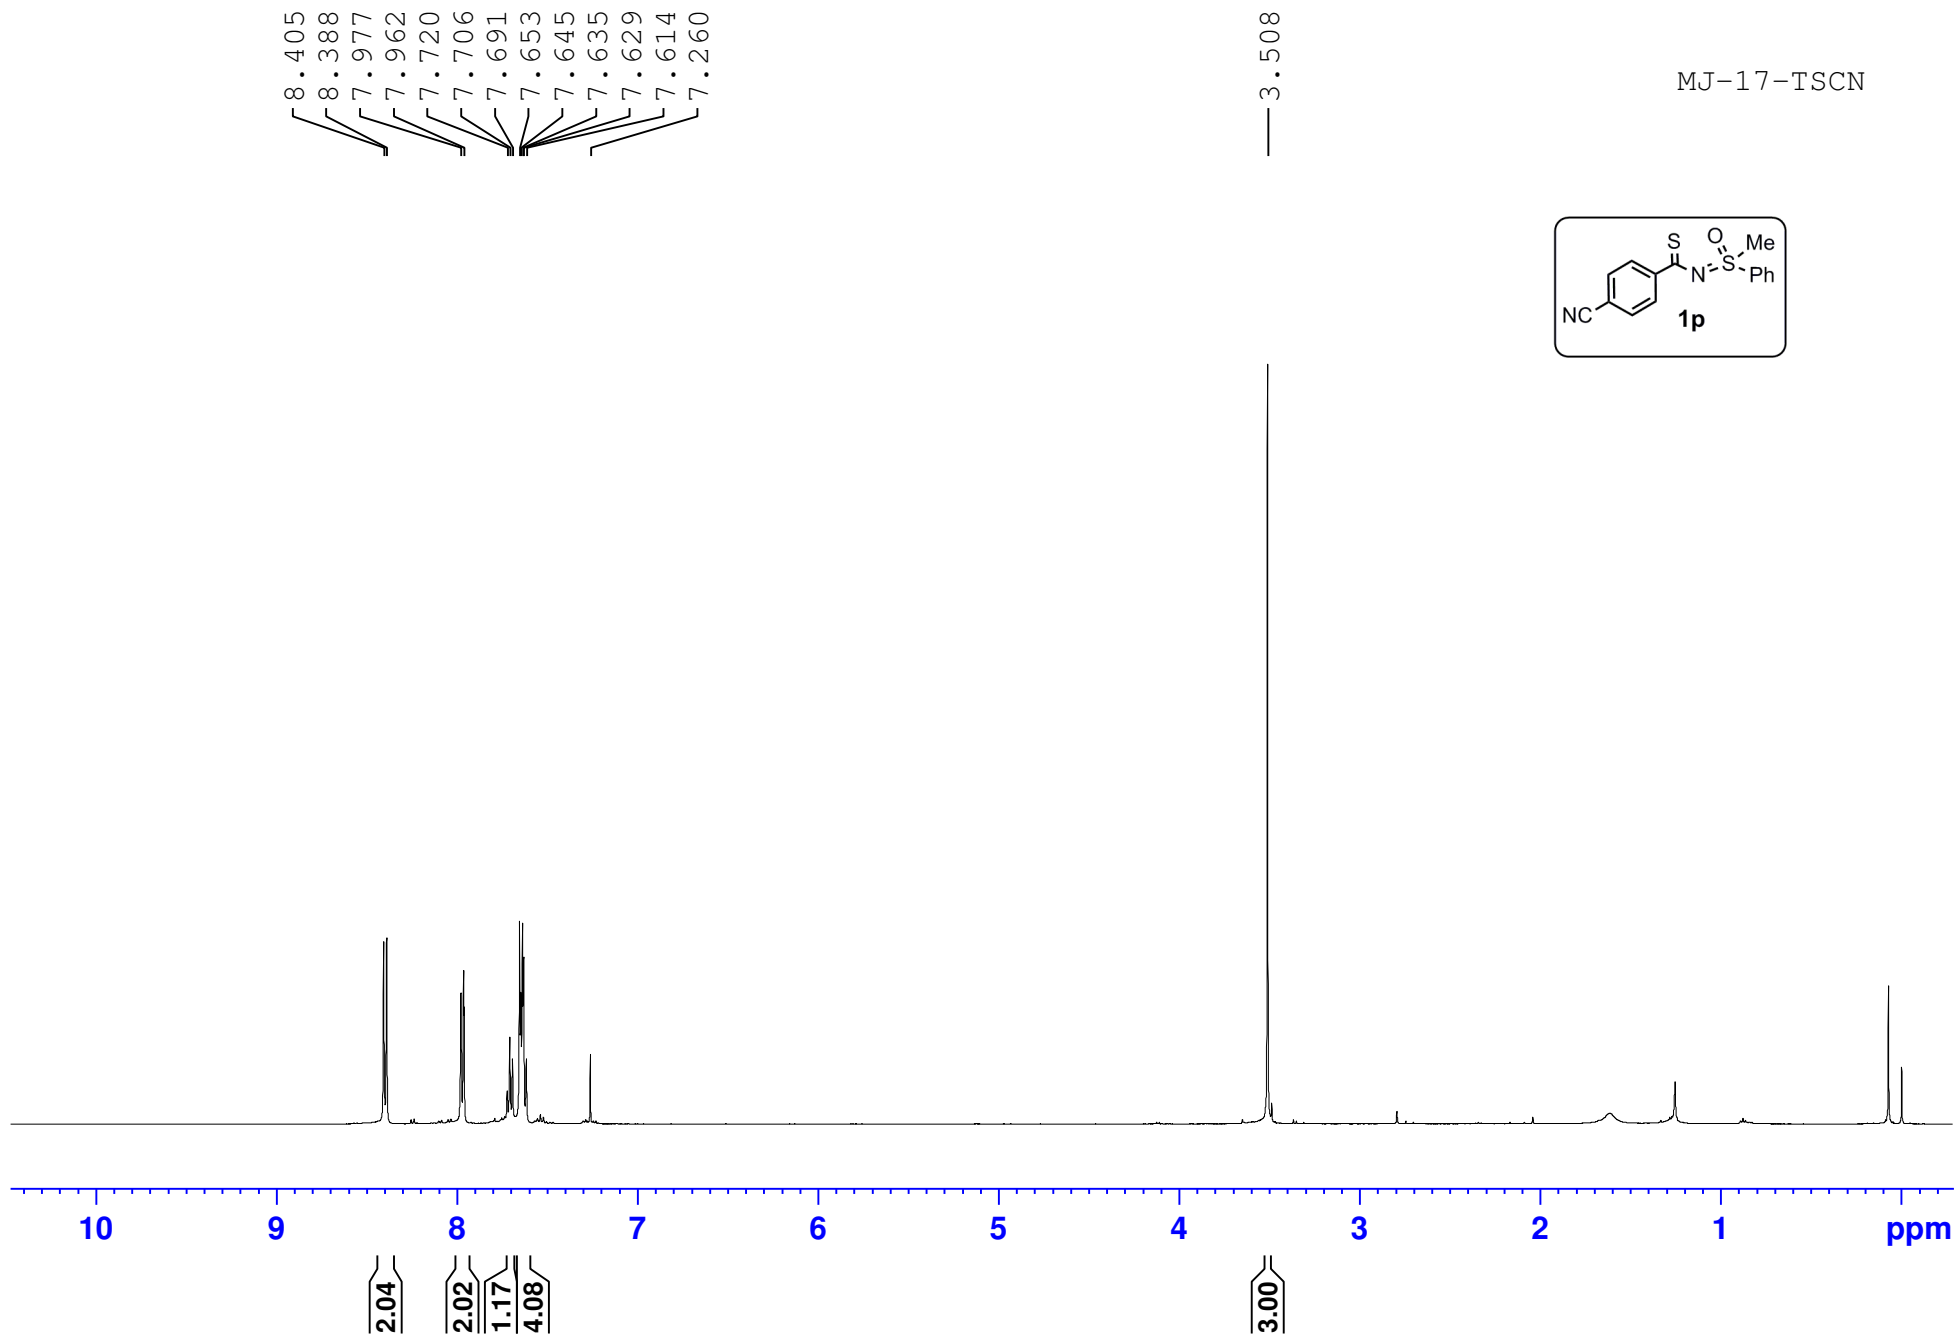

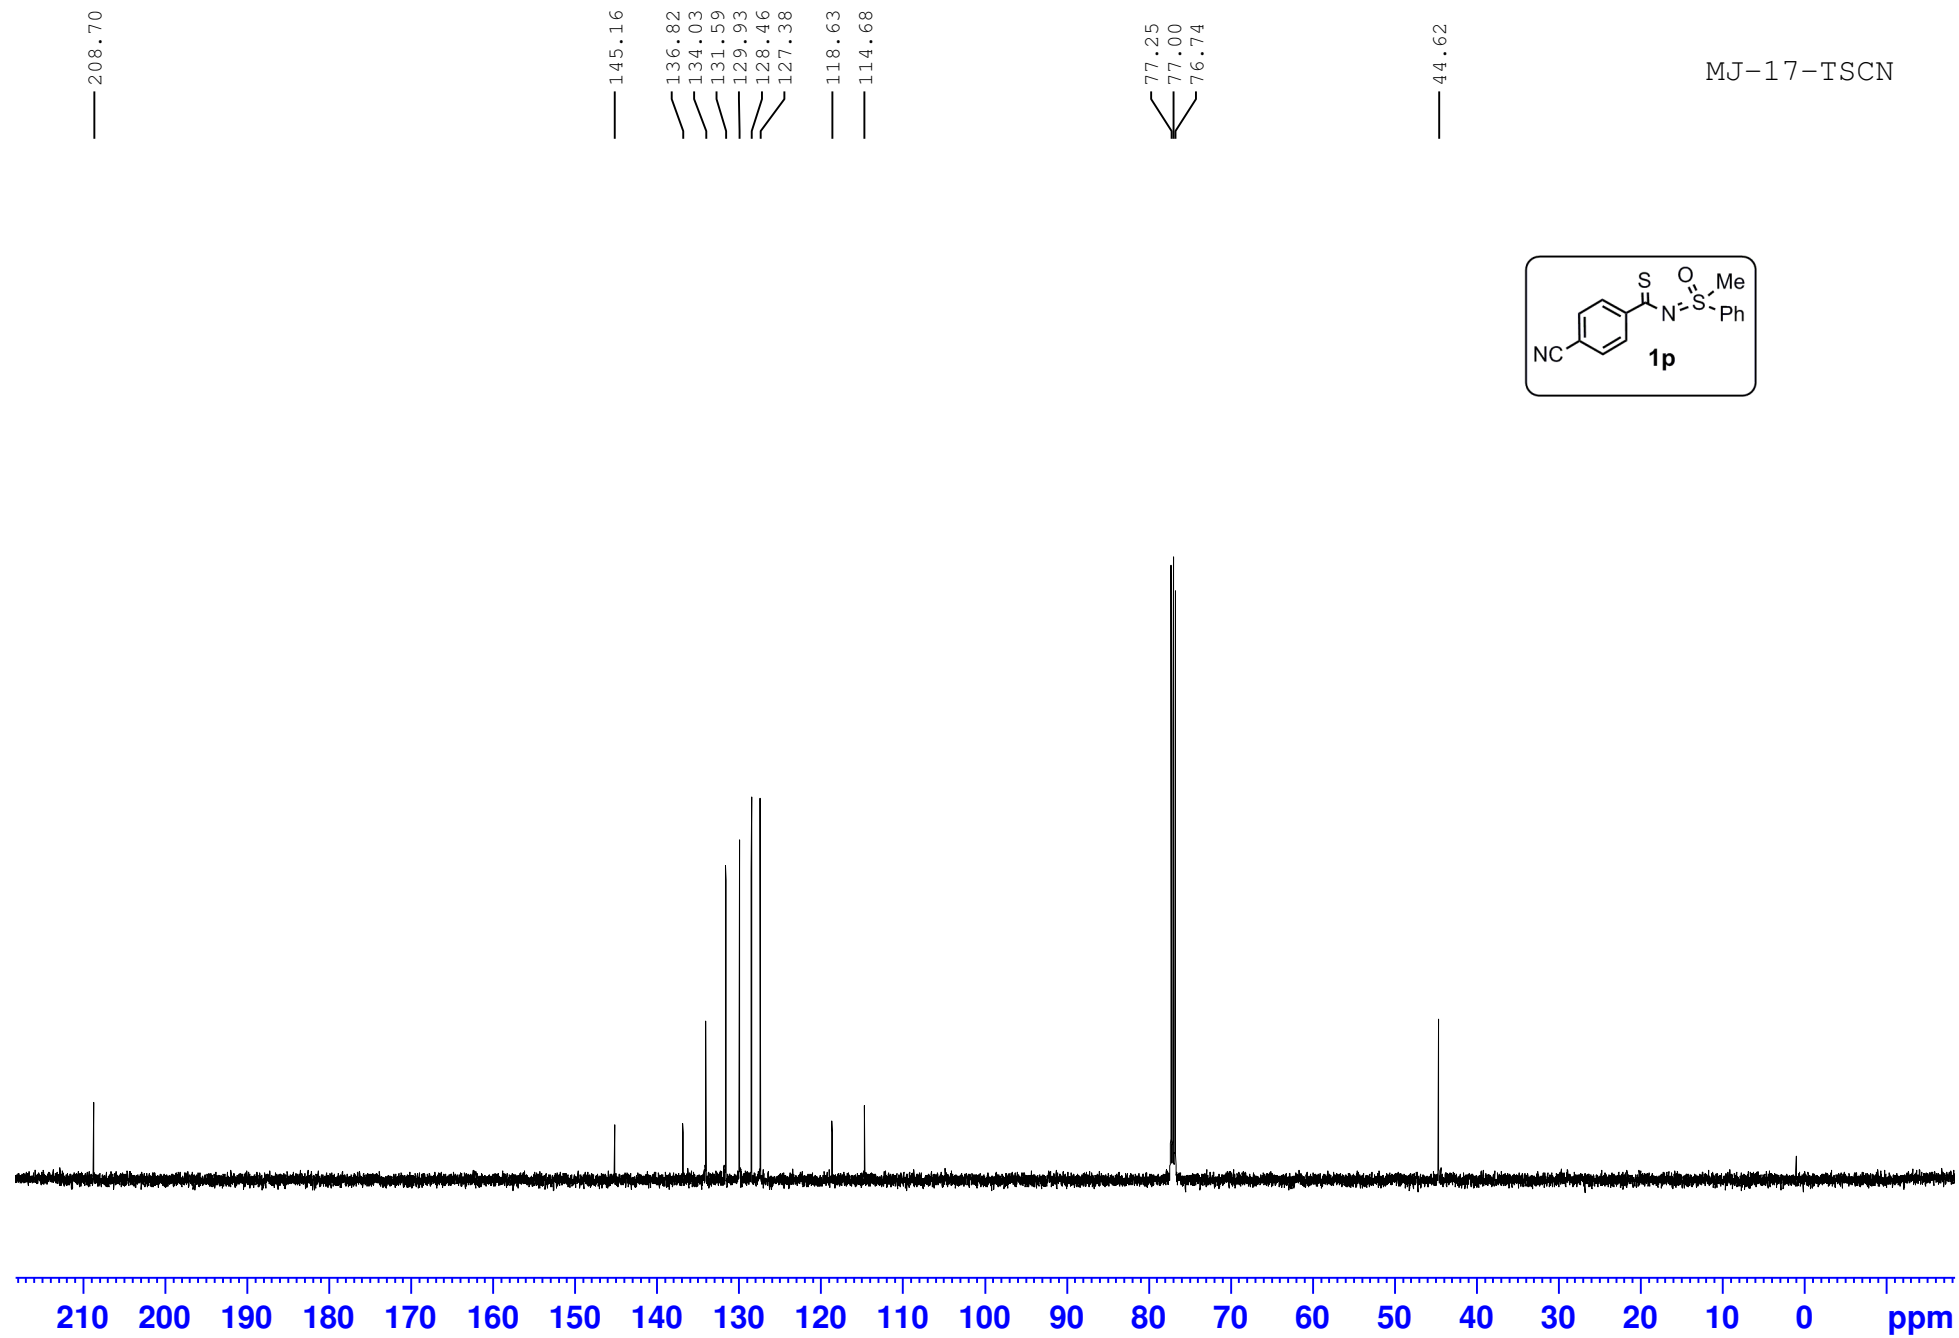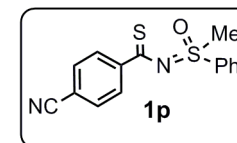

MJ-17-TSCN

8.378  
8.361  
7.976  
7.961  
7.916  
7.899  
7.690  
7.676  
7.661  
7.618  
7.602  
7.587  
7.260

— 3.500

— 2.609

MJ-17-210

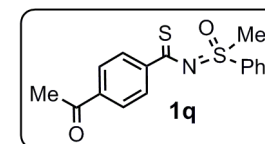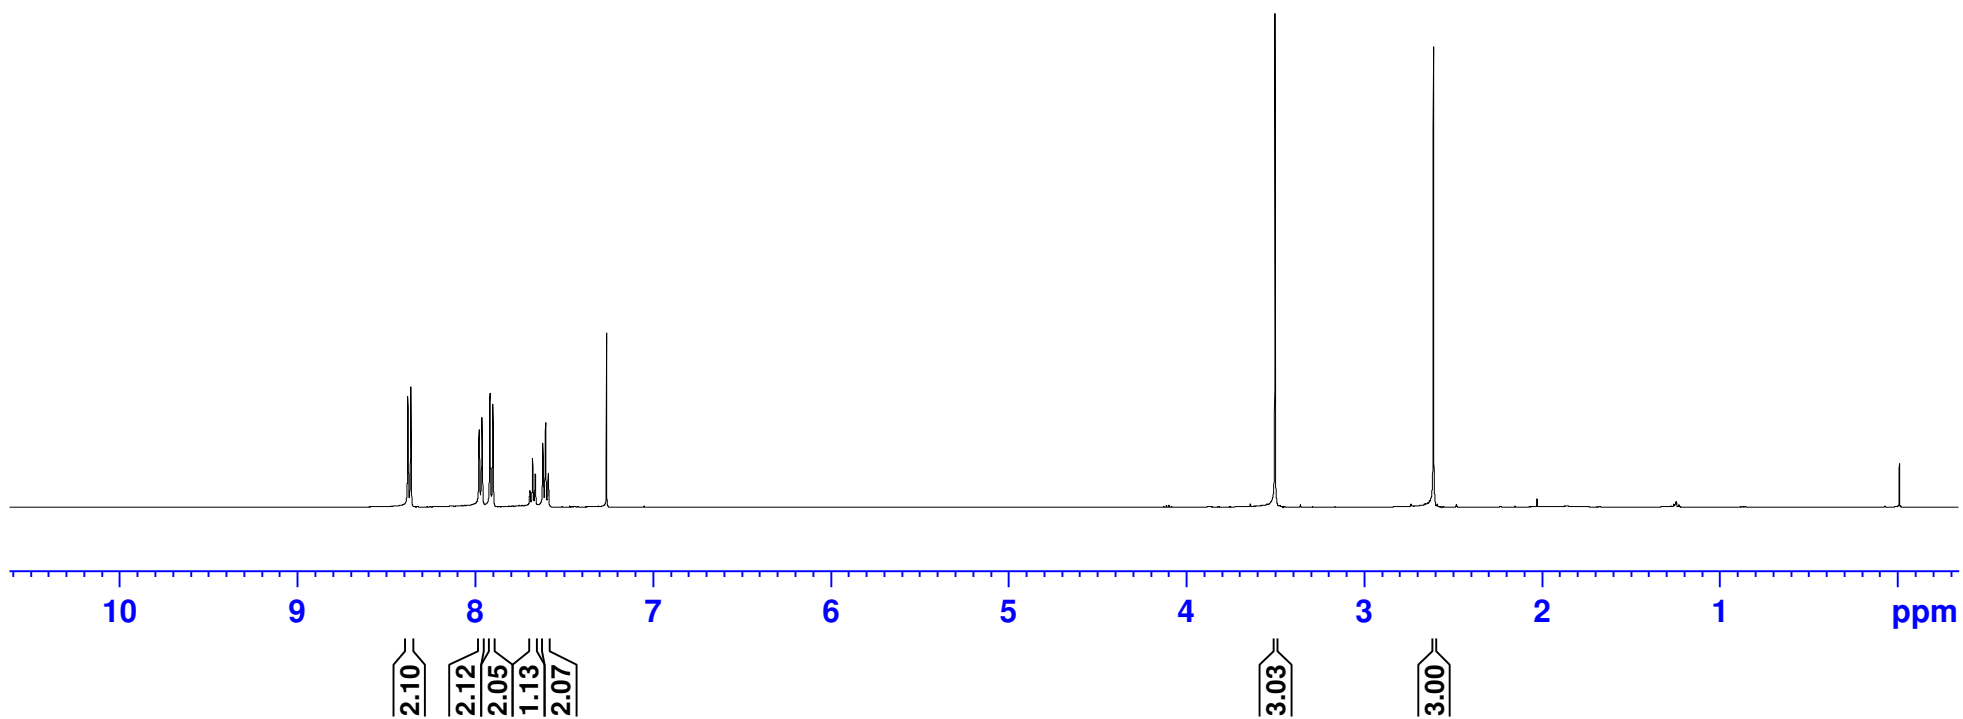

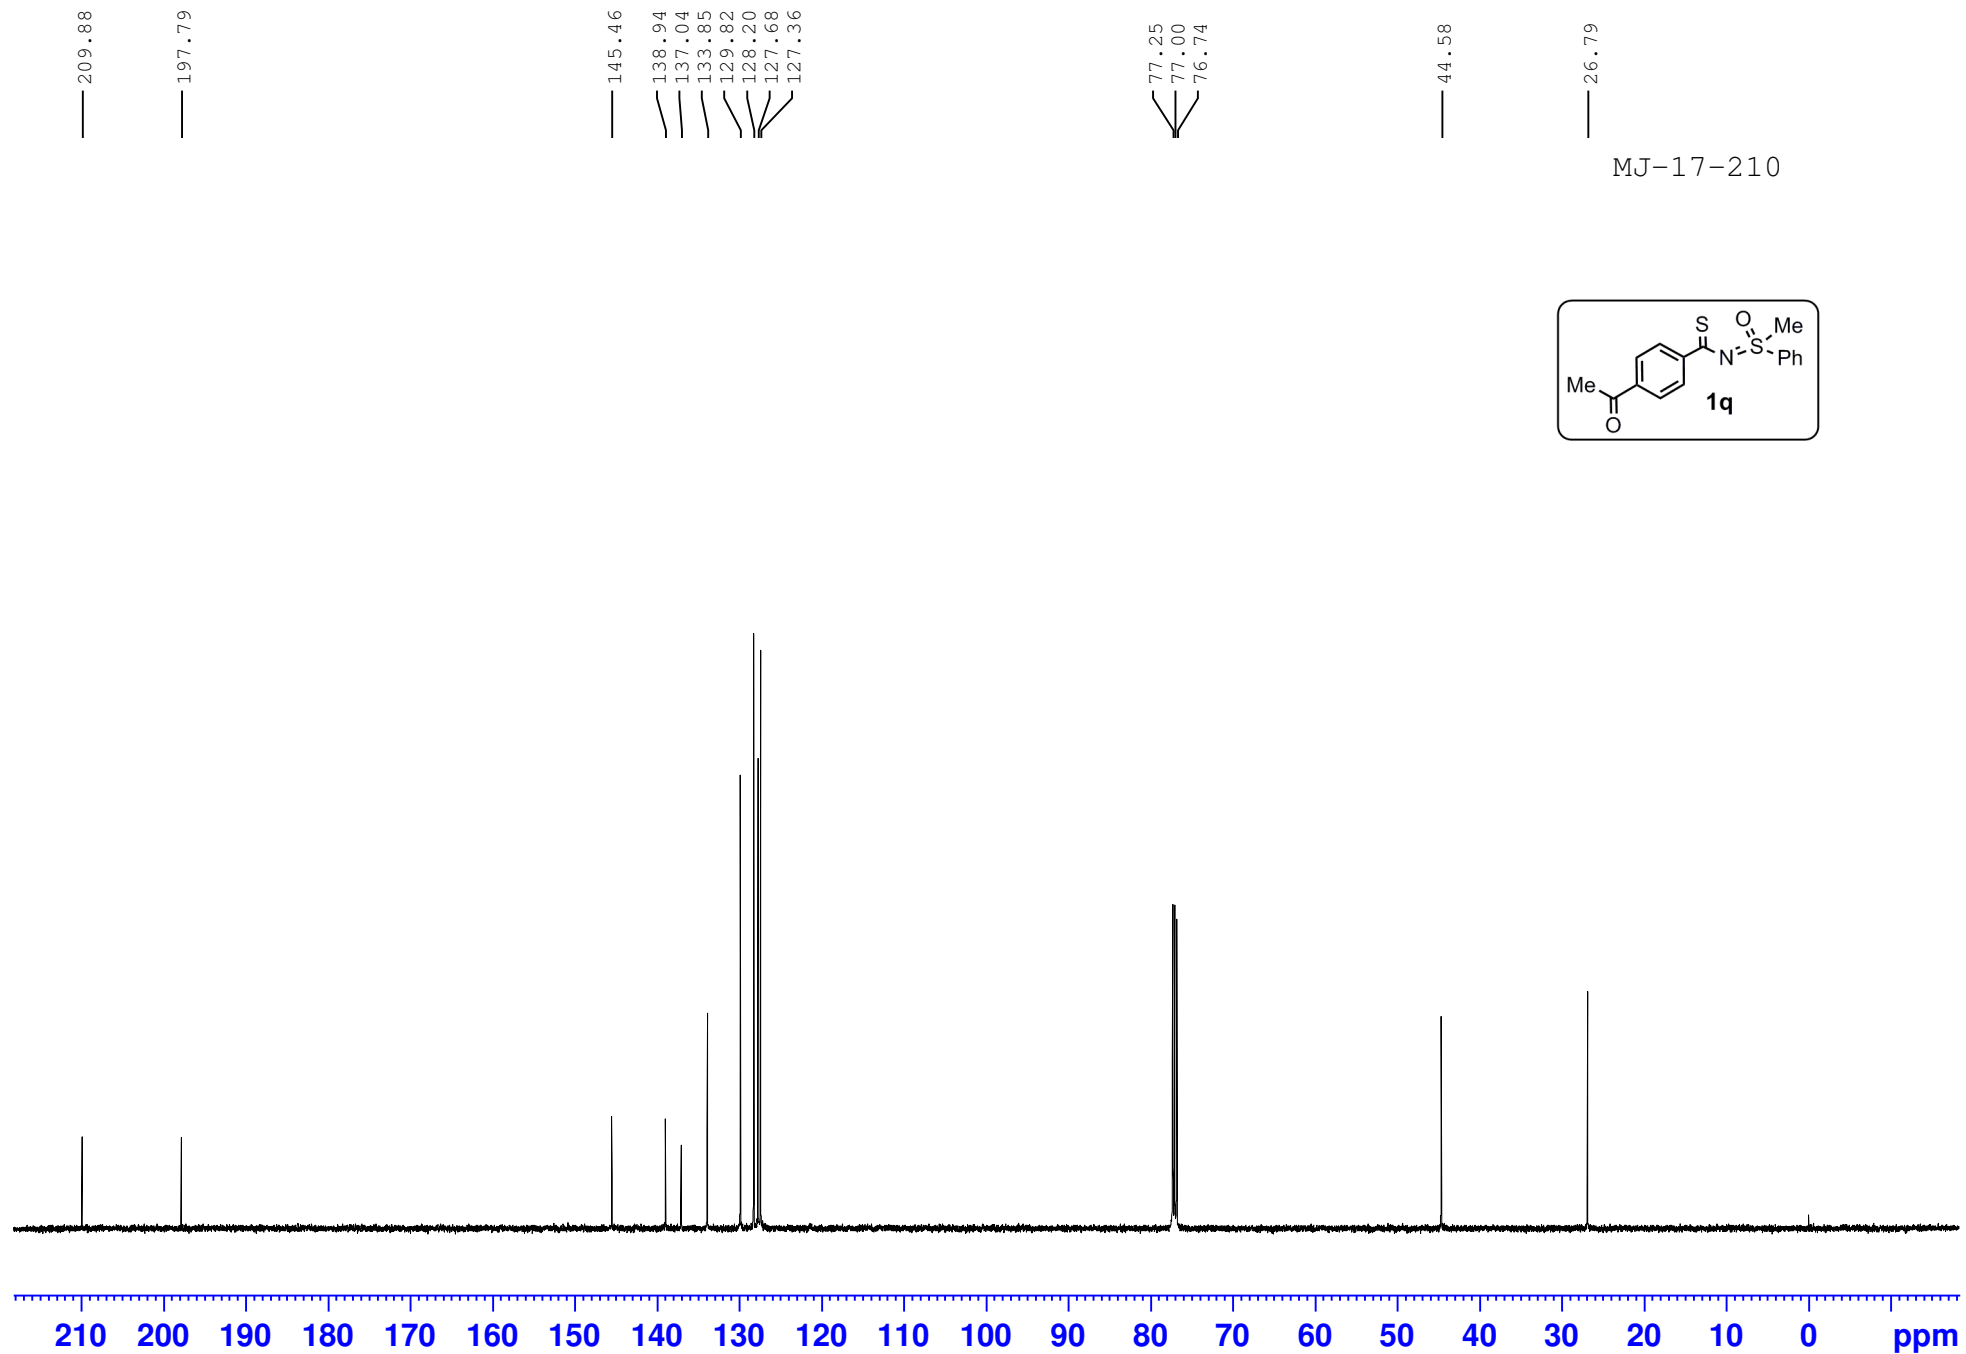

MJ-17-210

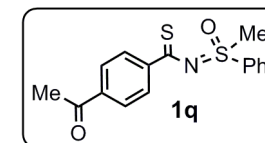

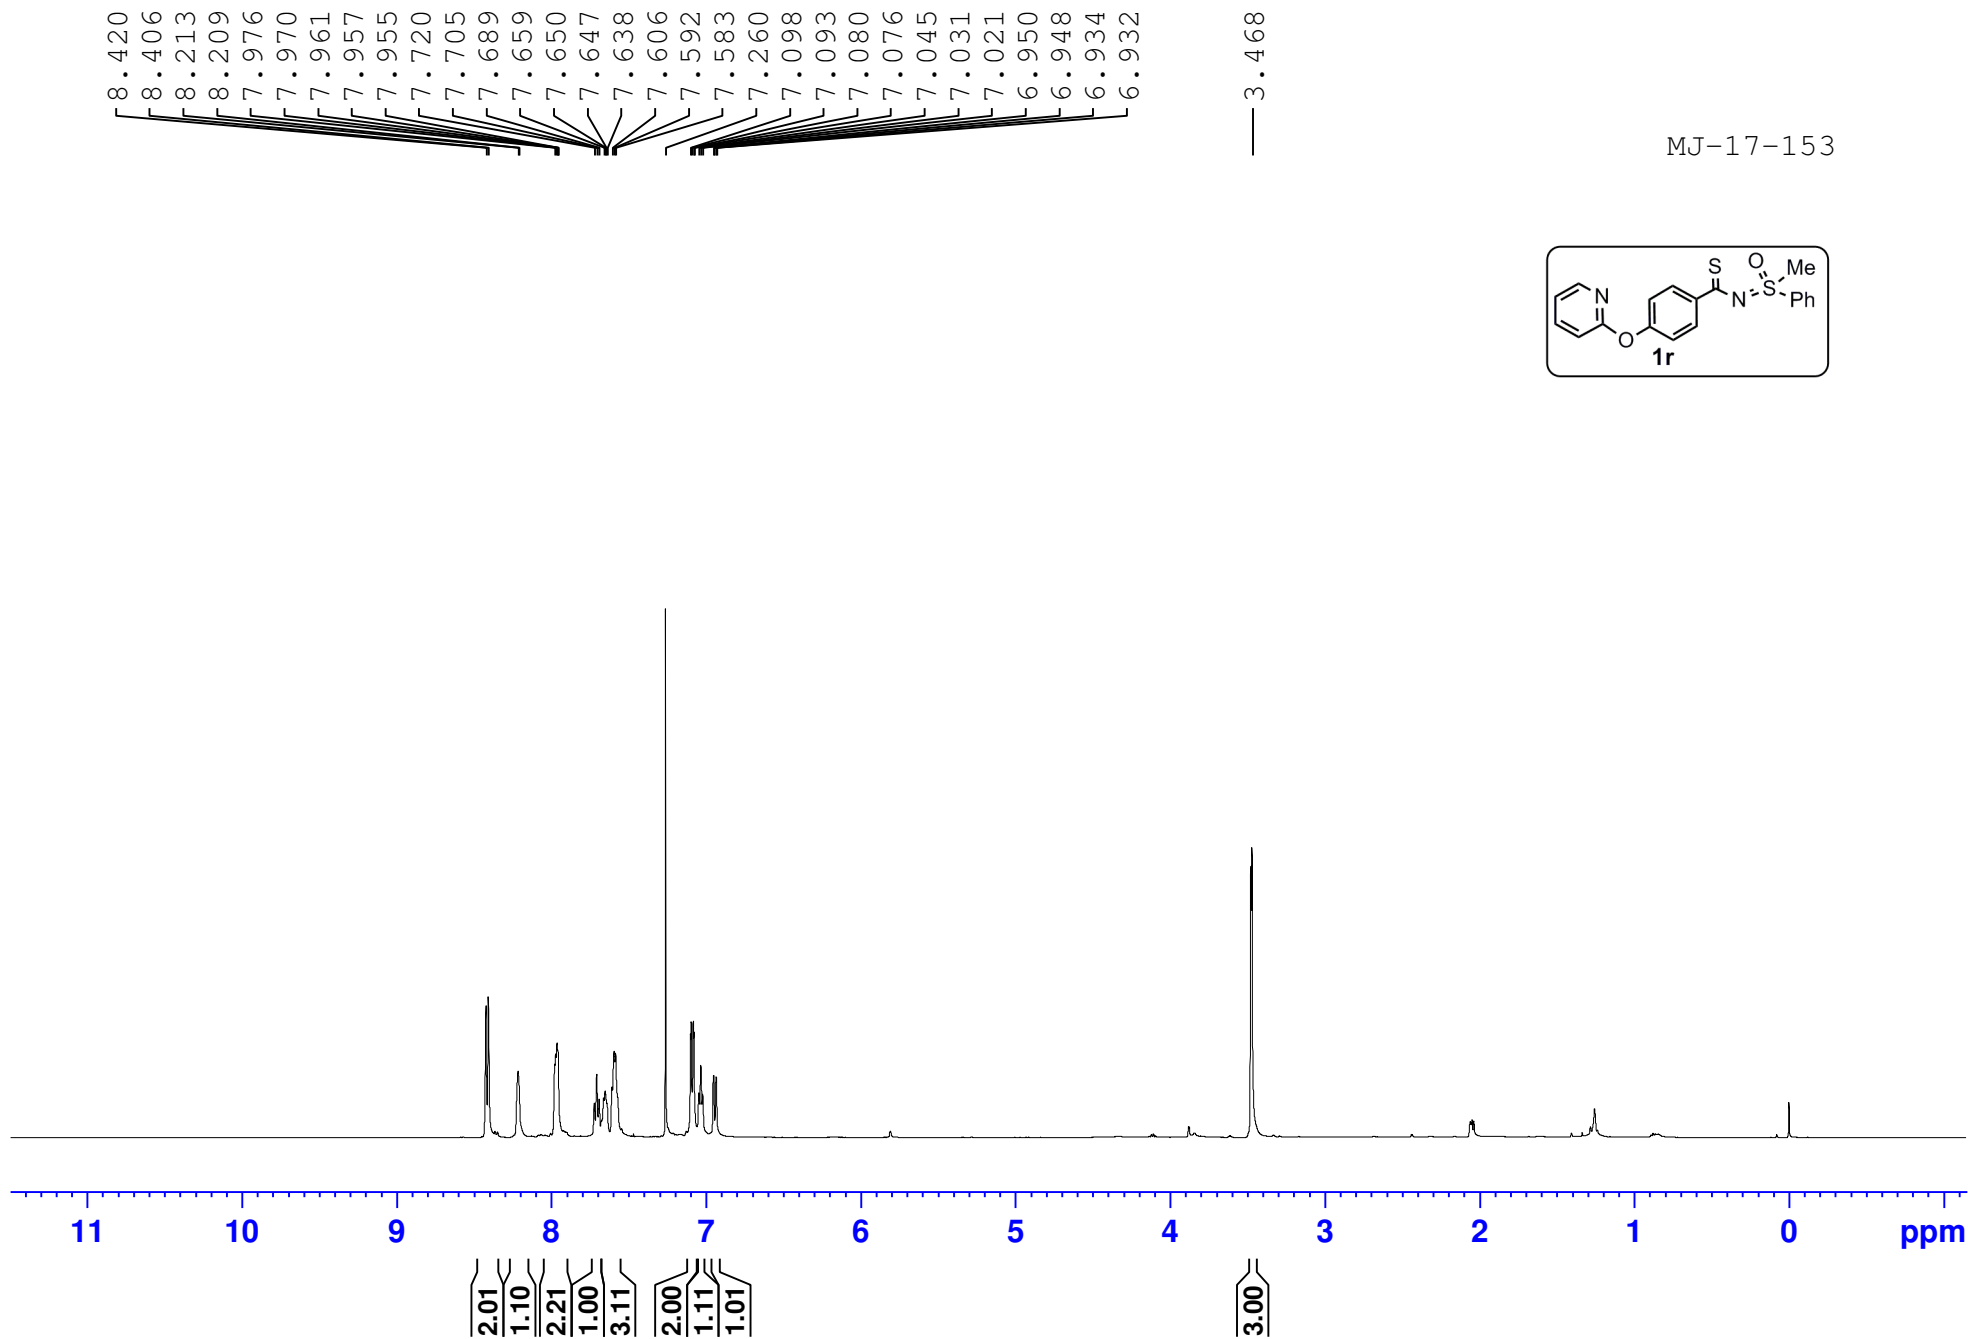

MJ-17-153

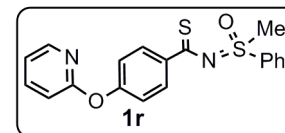

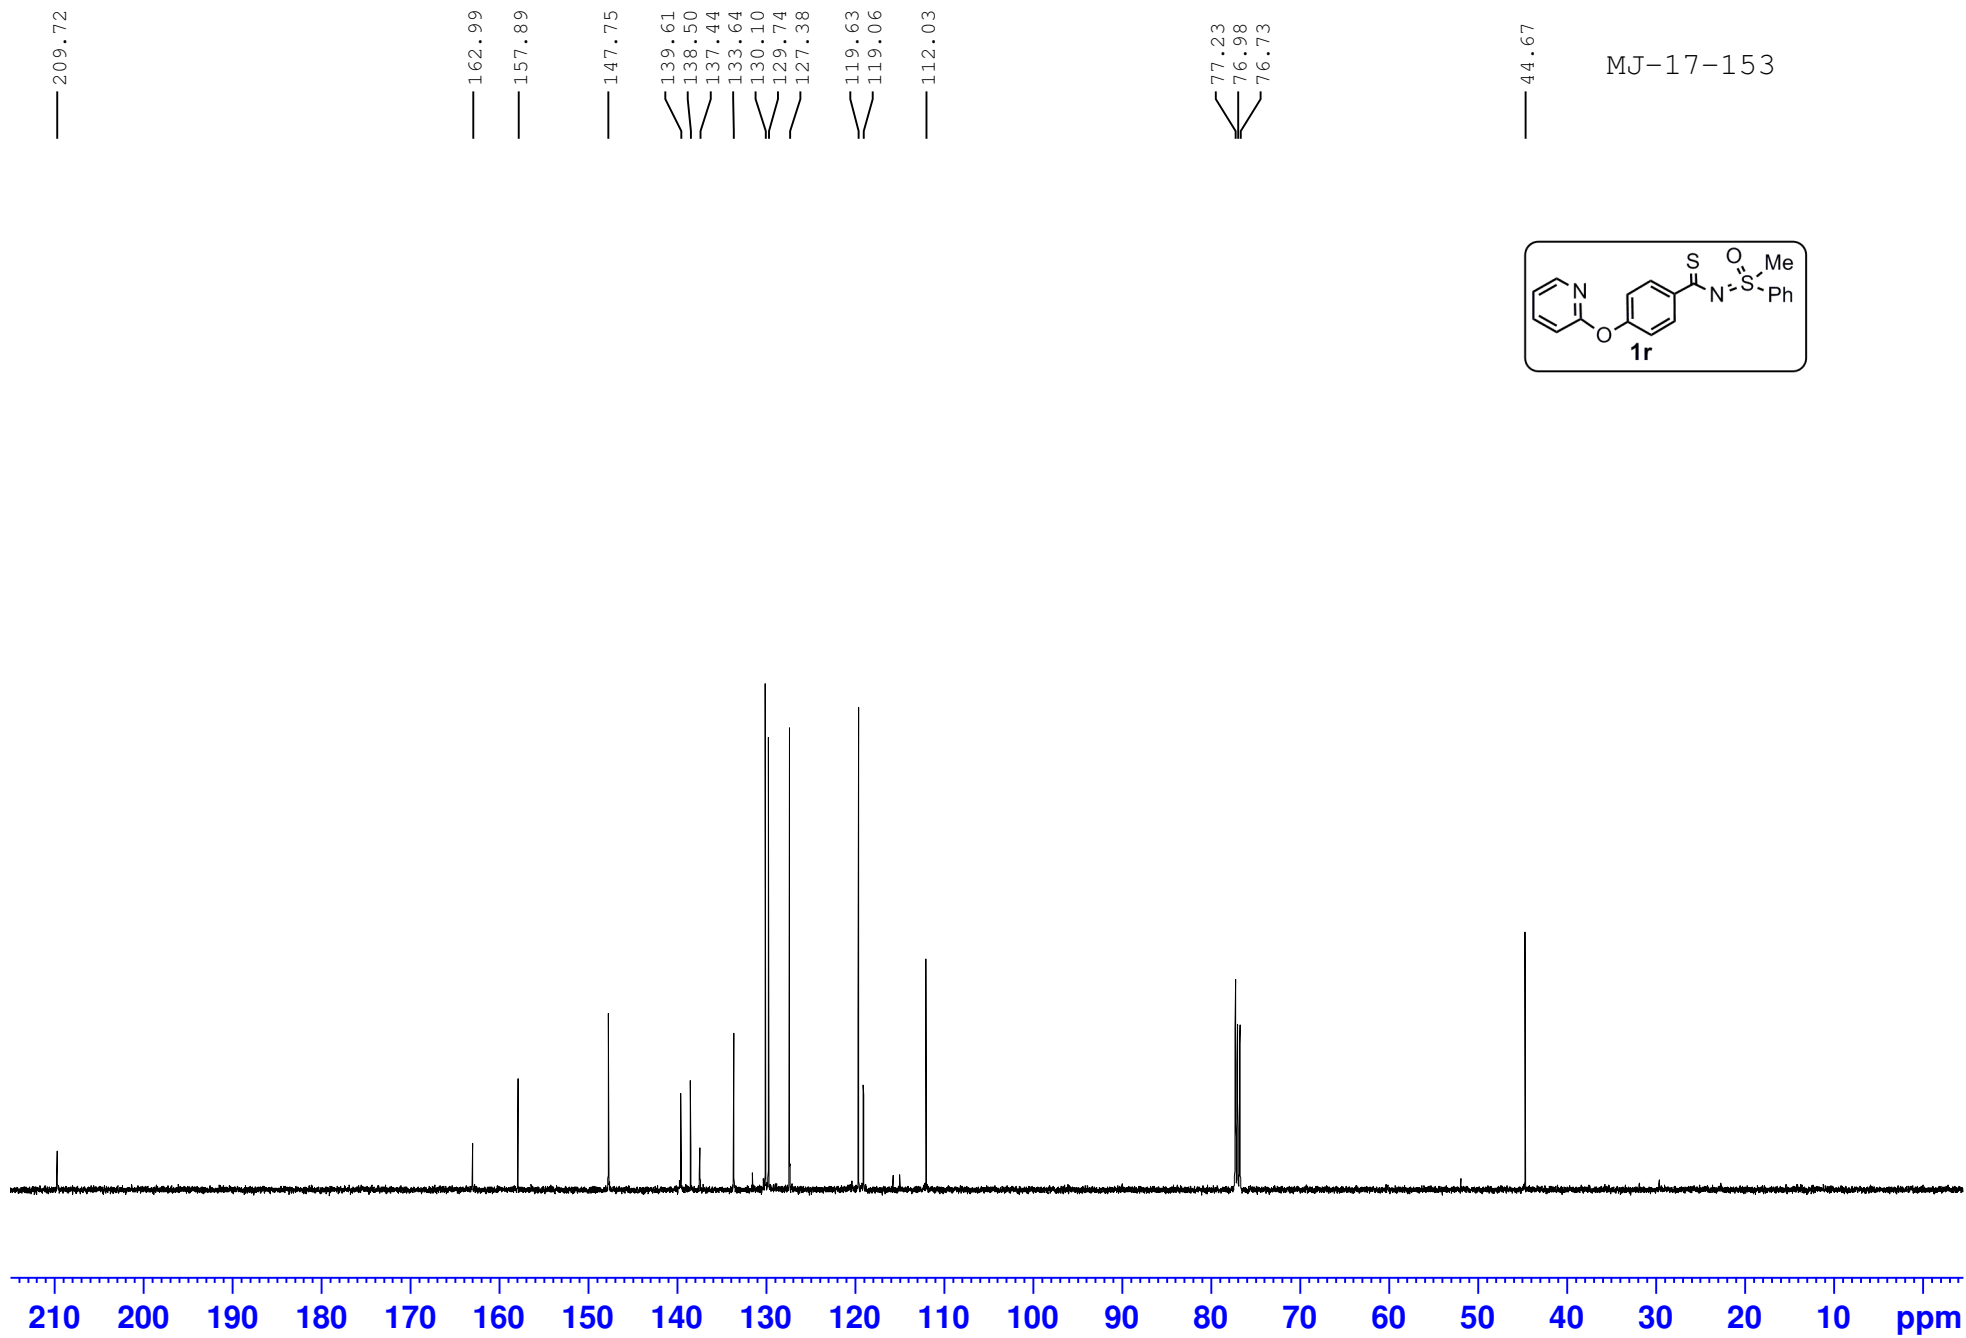

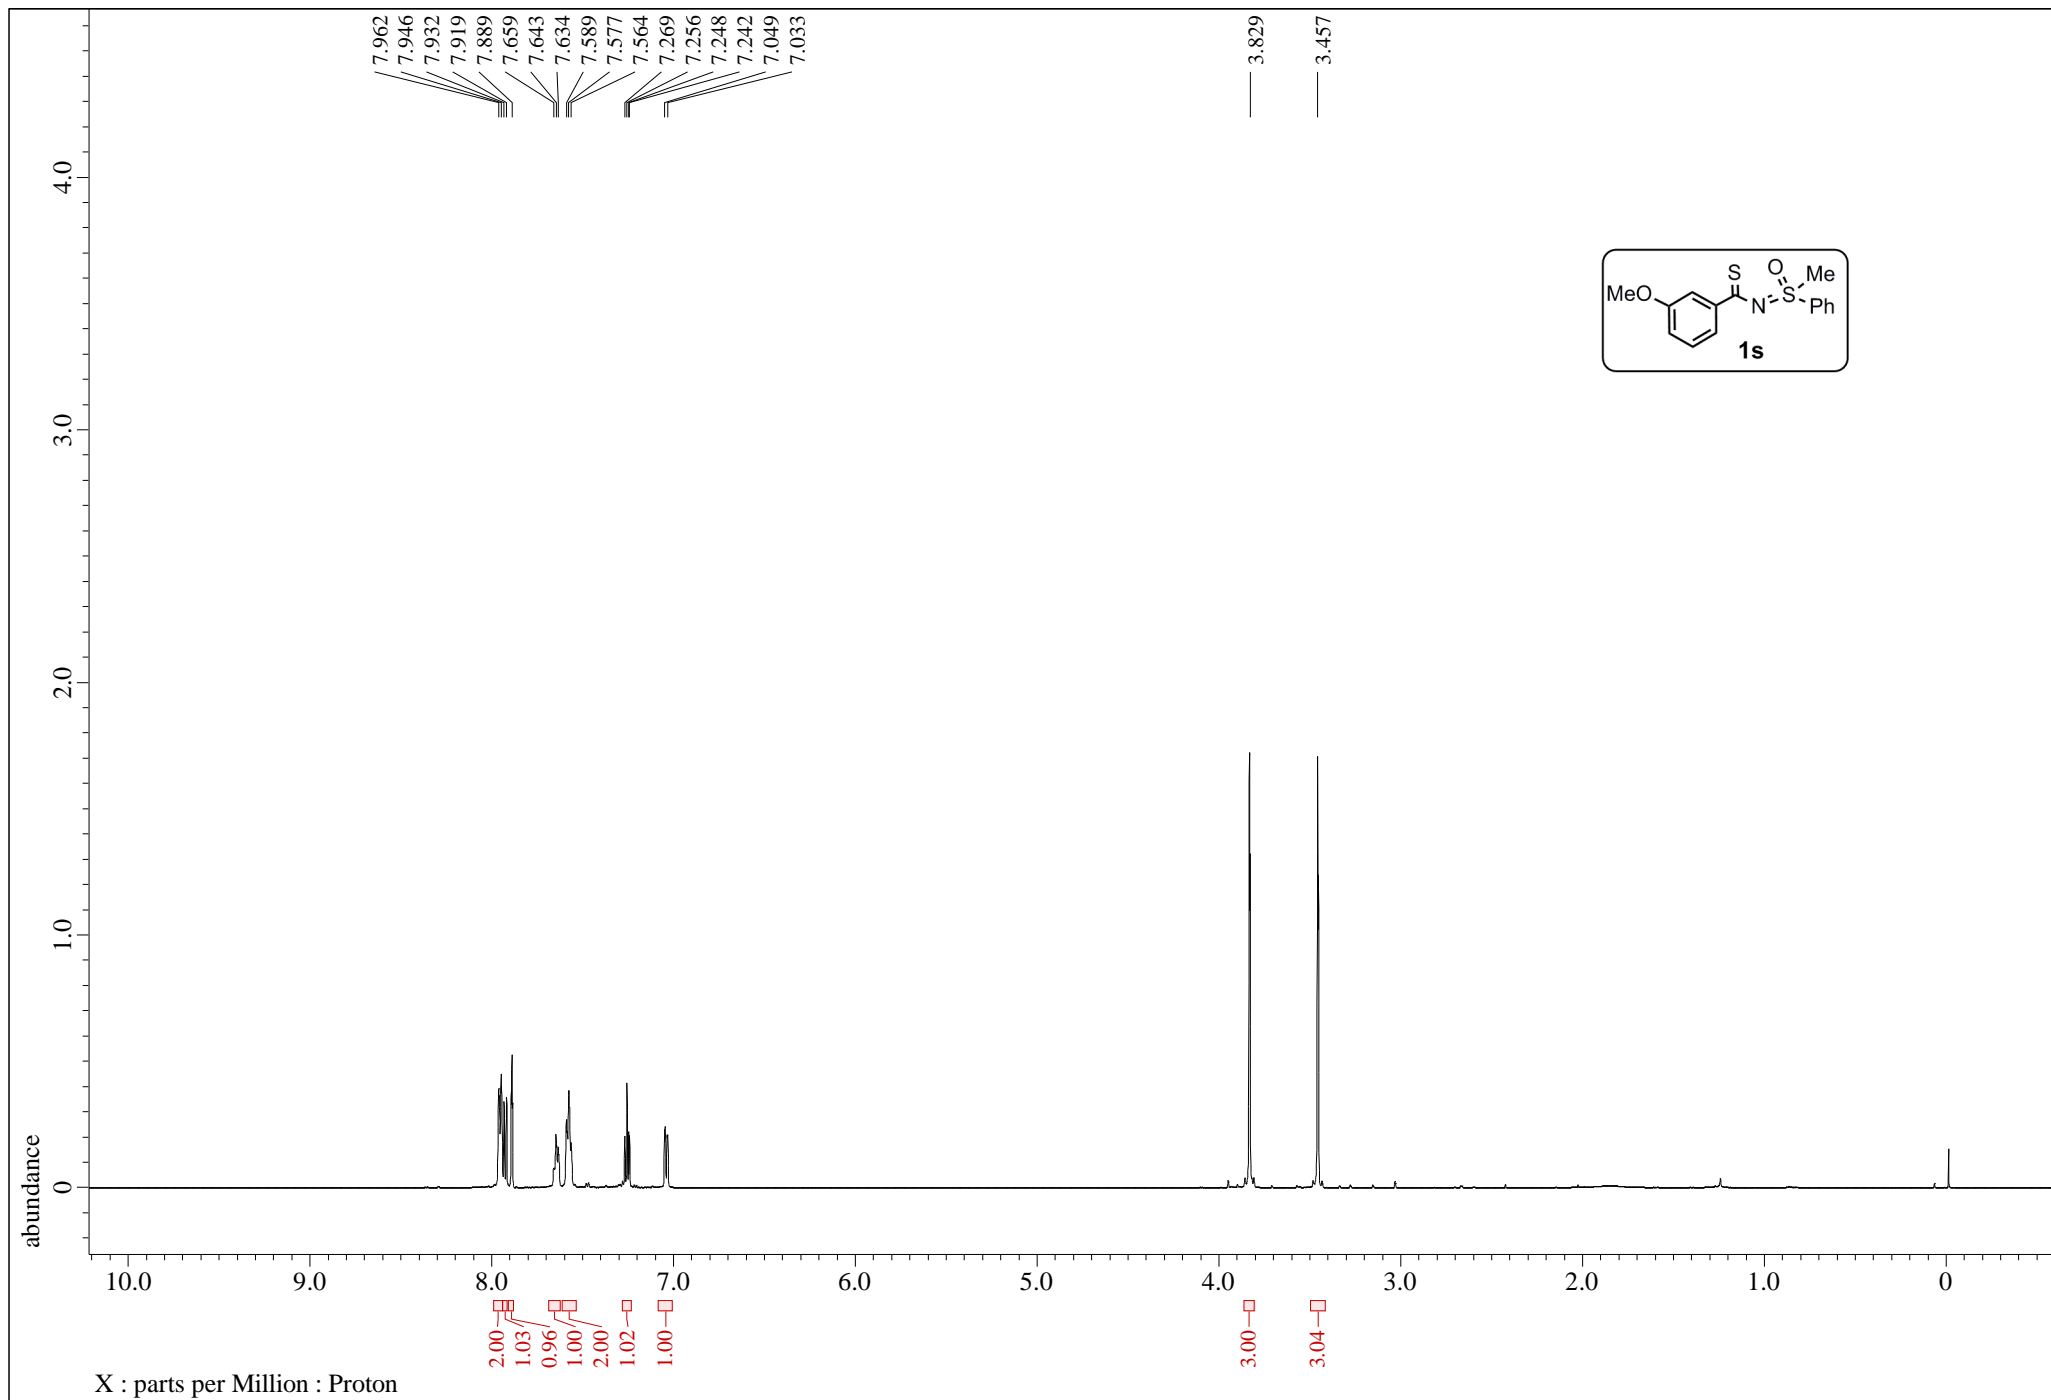

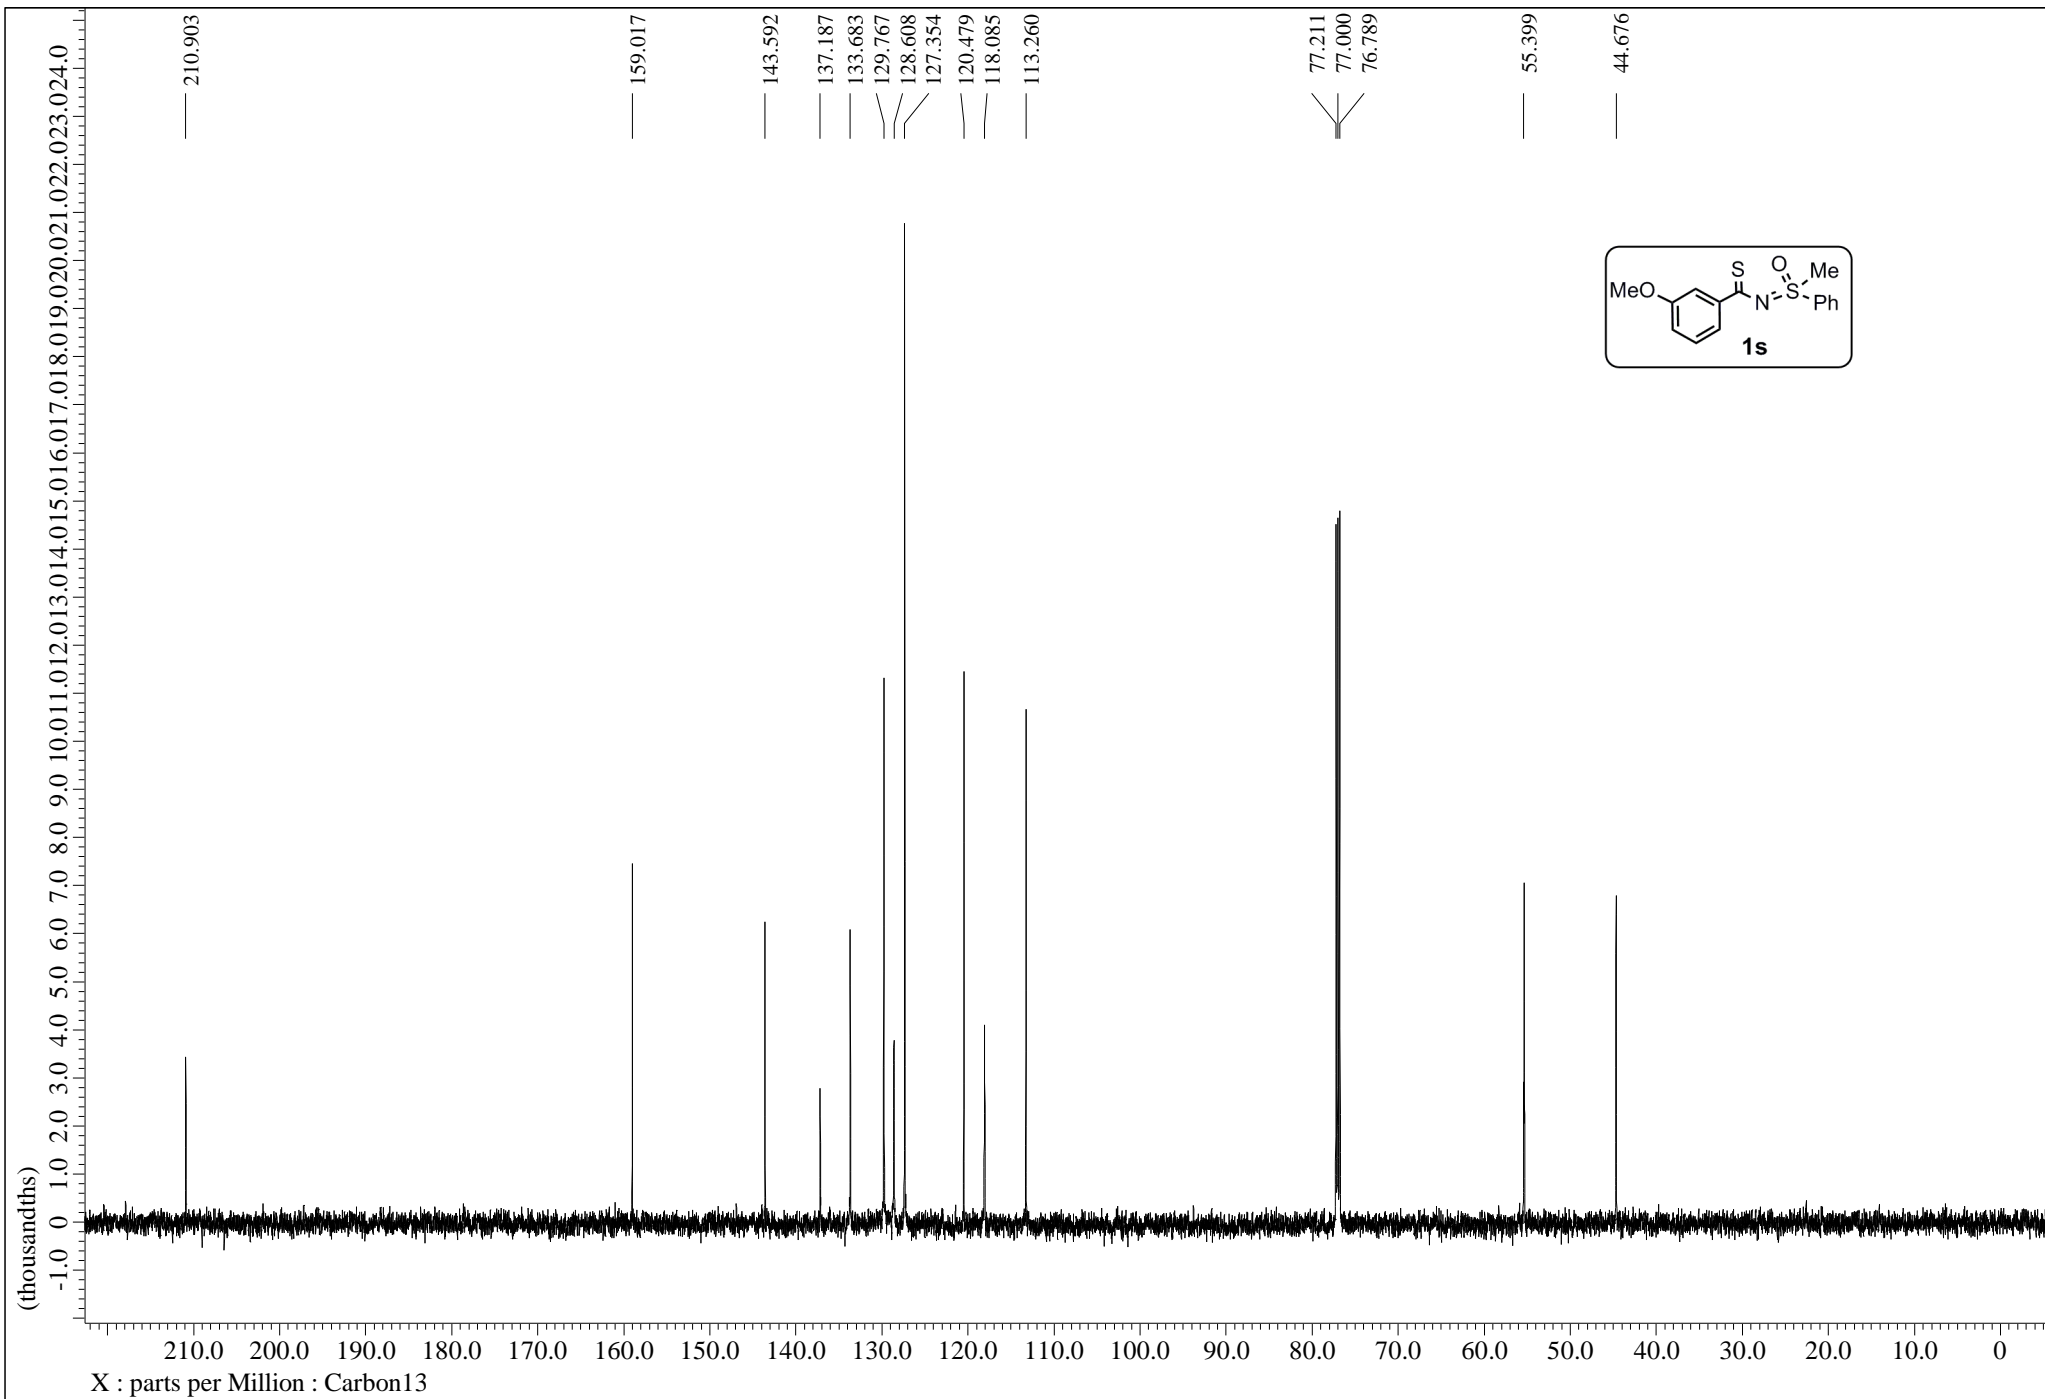



8.130  
8.127  
8.126  
8.123  
8.110  
8.108  
8.106  
8.104  
8.028  
8.023  
8.018  
7.965  
7.964  
7.951  
7.946  
7.943  
7.691  
7.688  
7.685  
7.675  
7.670  
7.664  
7.654  
7.651  
7.648  
7.611  
7.591  
7.573  
7.363  
7.344  
7.324  
7.304  
7.260  
7.157  
7.155  
7.151  
7.149  
7.137  
7.134  
7.131  
7.128  
7.110  
7.094  
7.091  
7.088  
7.036  
7.033  
7.014  
7.011  
3.464

MJ-Oph

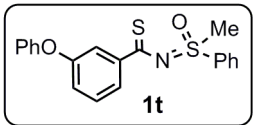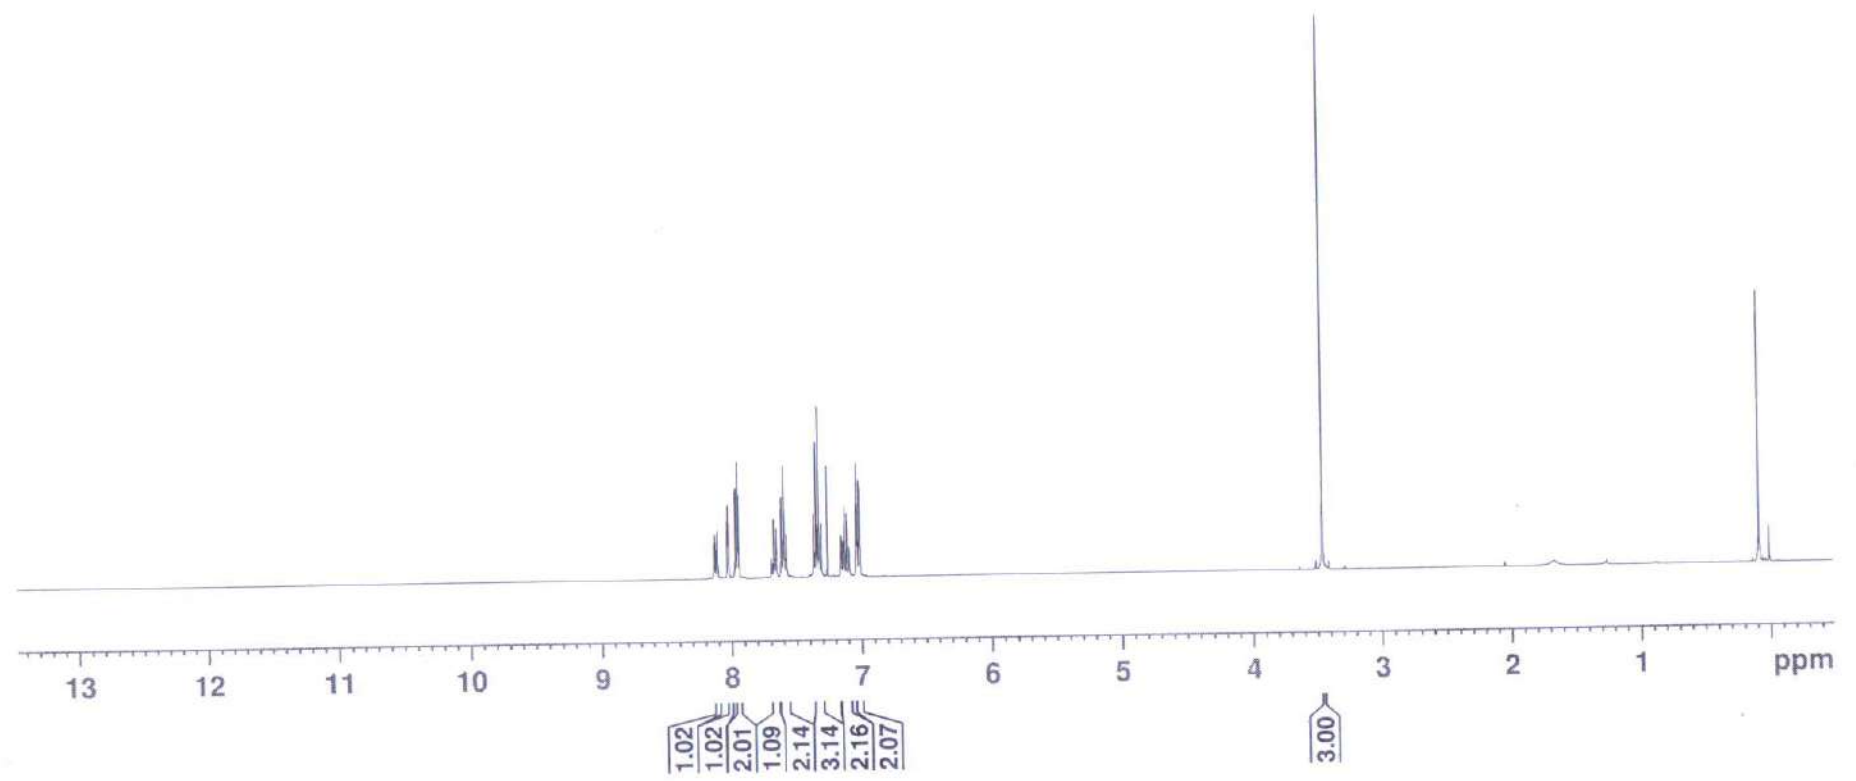

210.10

mj-oph-15

157.08  
156.51  
144.02  
137.10  
133.73  
129.77  
129.71  
128.94  
127.33  
123.53  
123.20  
122.27  
118.61  
118.42

77.32  
77.00  
76.68

44.53

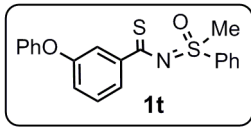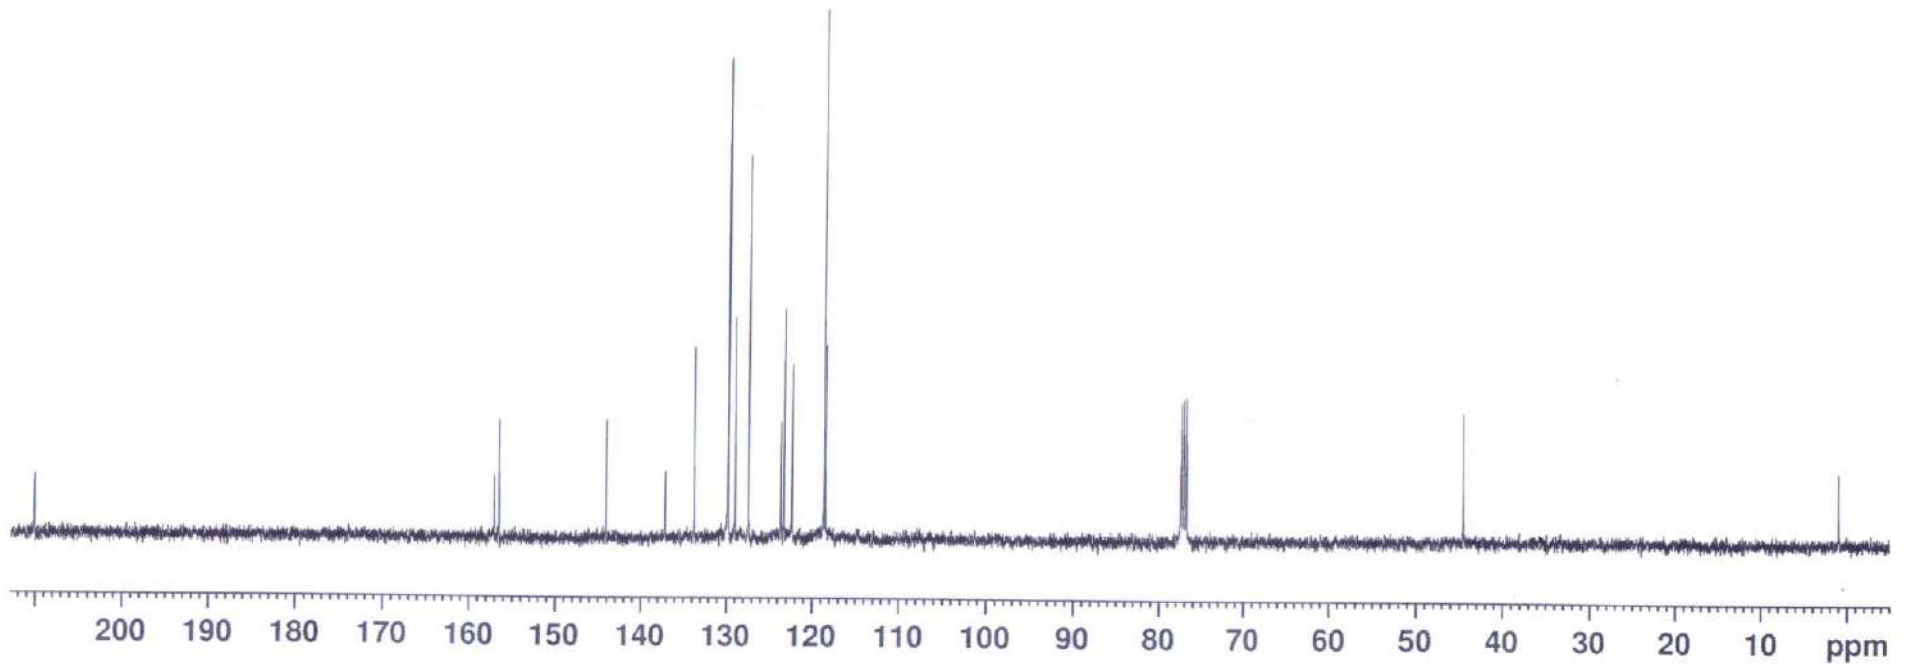

MAJJI-17-307

8.080  
8.070  
8.066  
7.973  
7.960  
7.956  
7.953  
7.935  
7.932  
7.926  
7.922  
7.916  
7.909  
7.905  
7.795  
7.772  
7.755  
7.713  
7.708  
7.698  
7.683  
7.648  
7.638  
7.623  
7.608  
7.260

— 3.983  
— 3.513

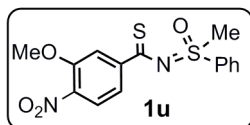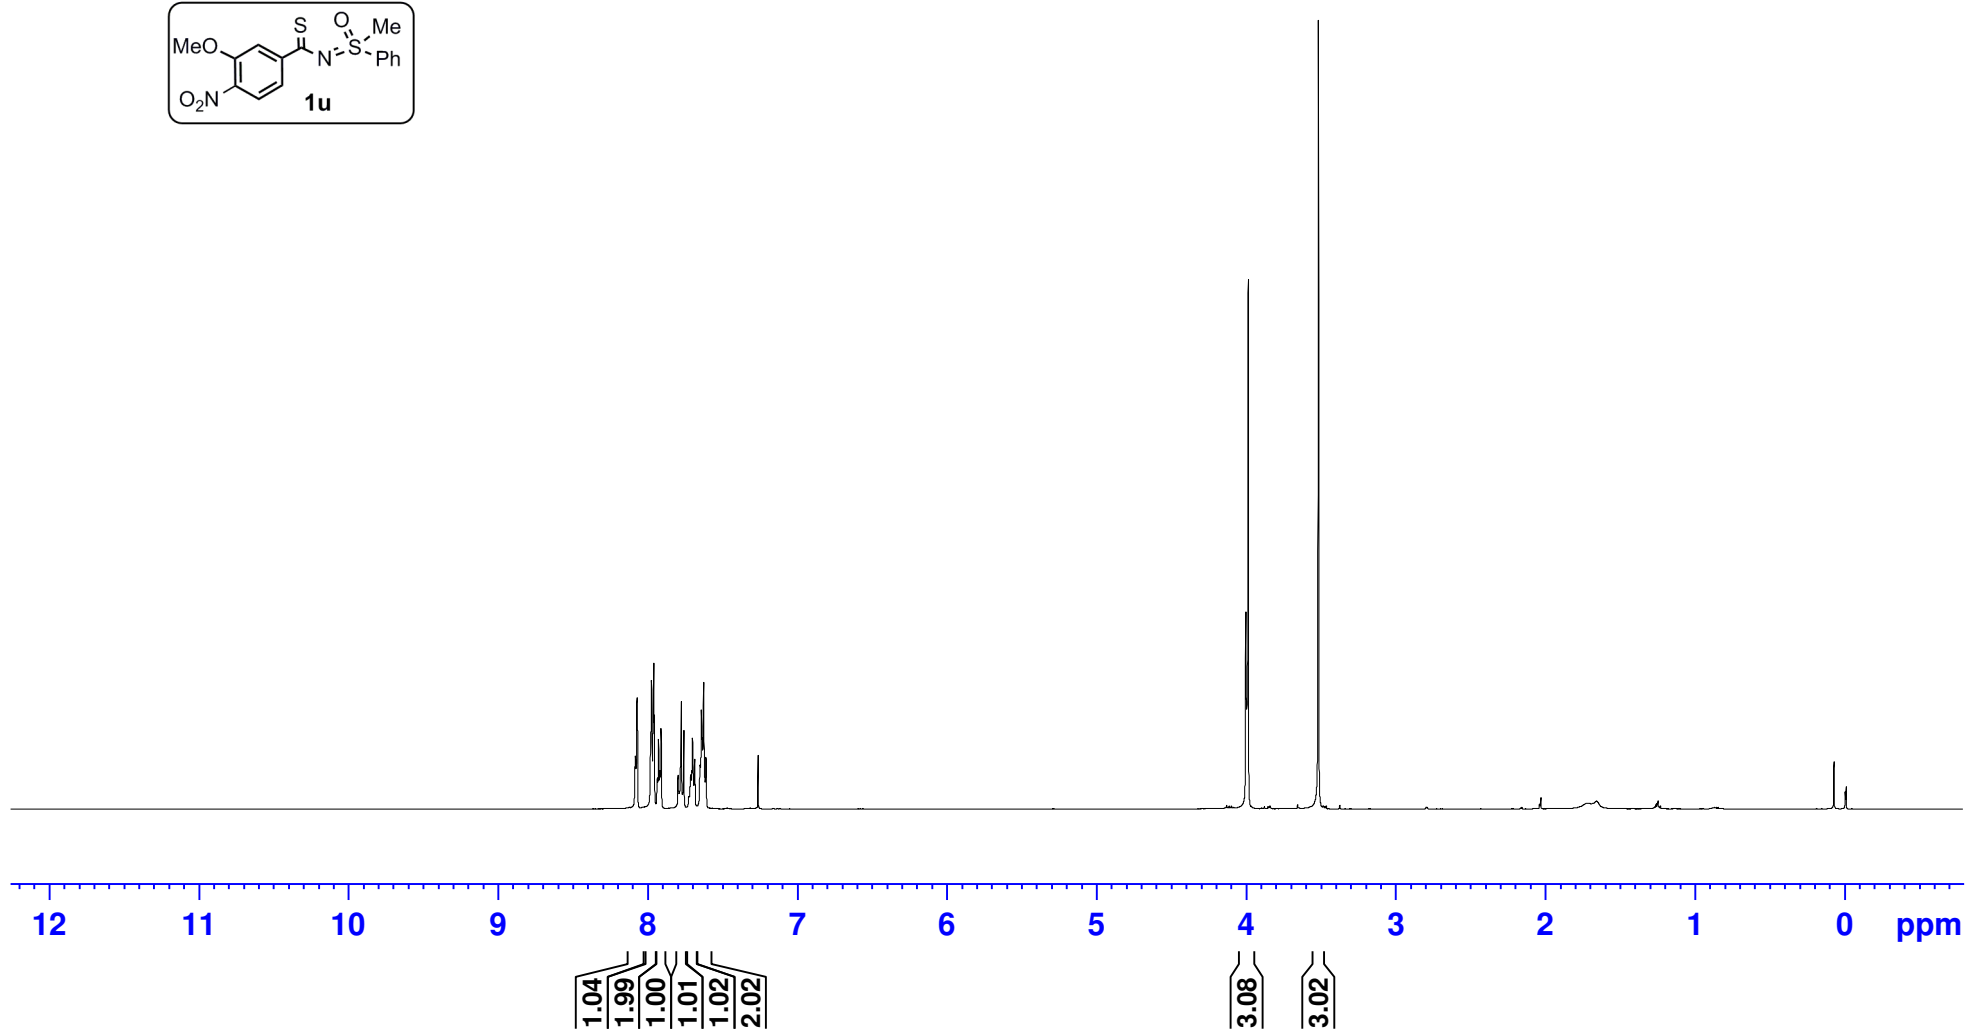

— 208.19

— 152.09

— 146.41

— 141.13

— 136.59

— 134.08

— 129.94

— 127.38

— 124.91

— 119.14

— 119.07

— 114.04

— 113.97

— 77.25

— 77.00

— 76.74

— 56.59

— 44.62

MAJJI-17-307

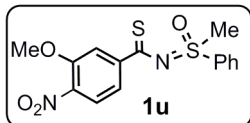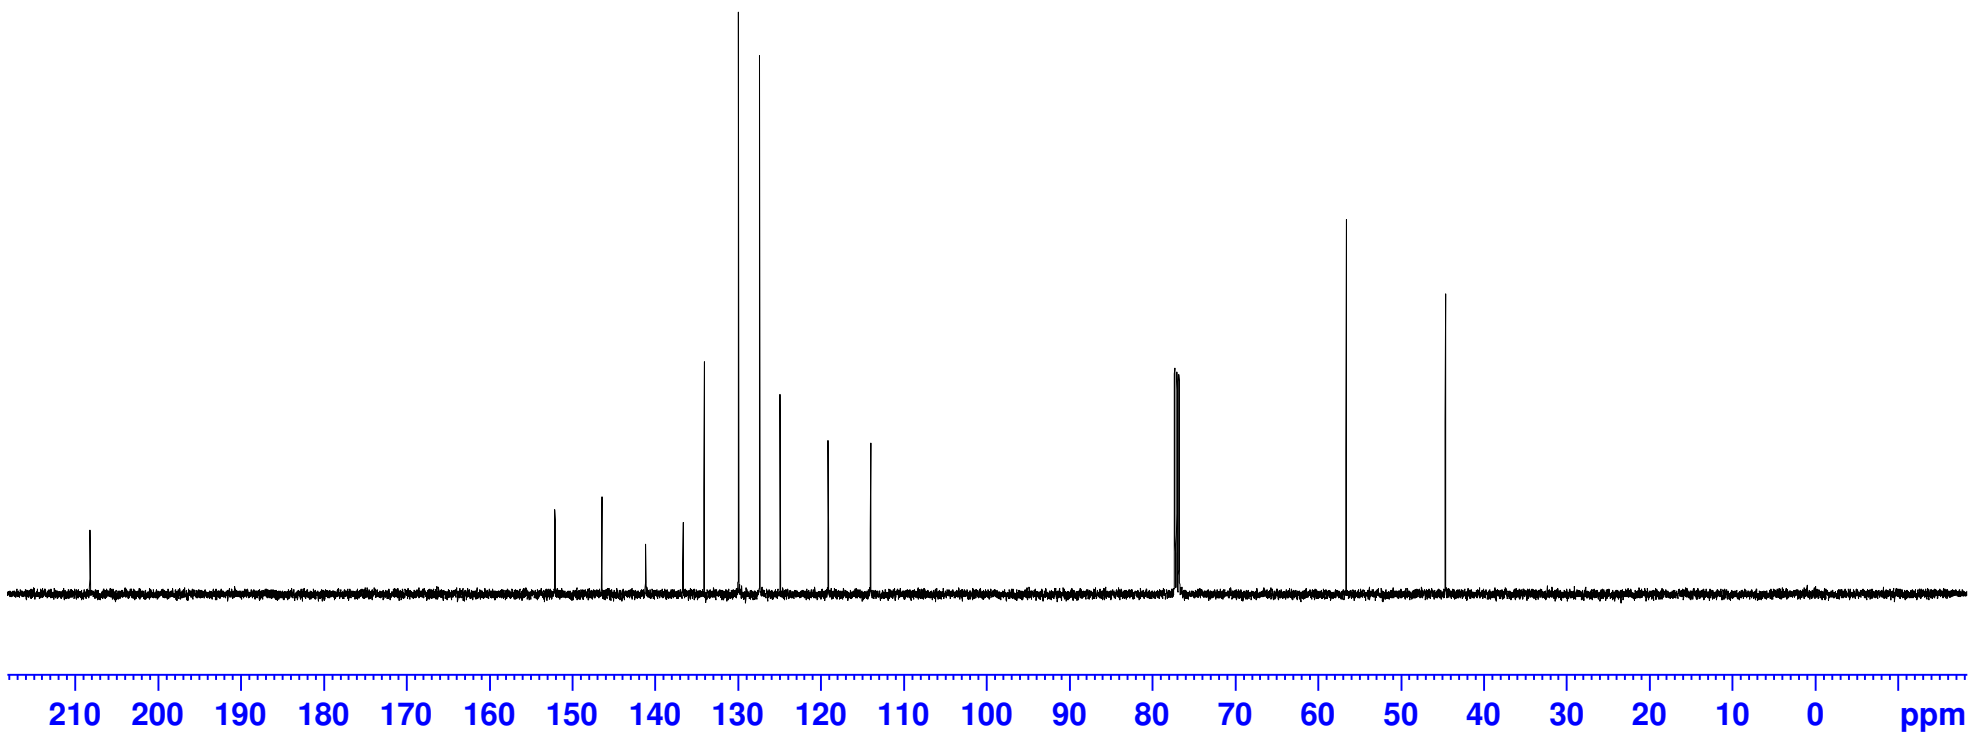

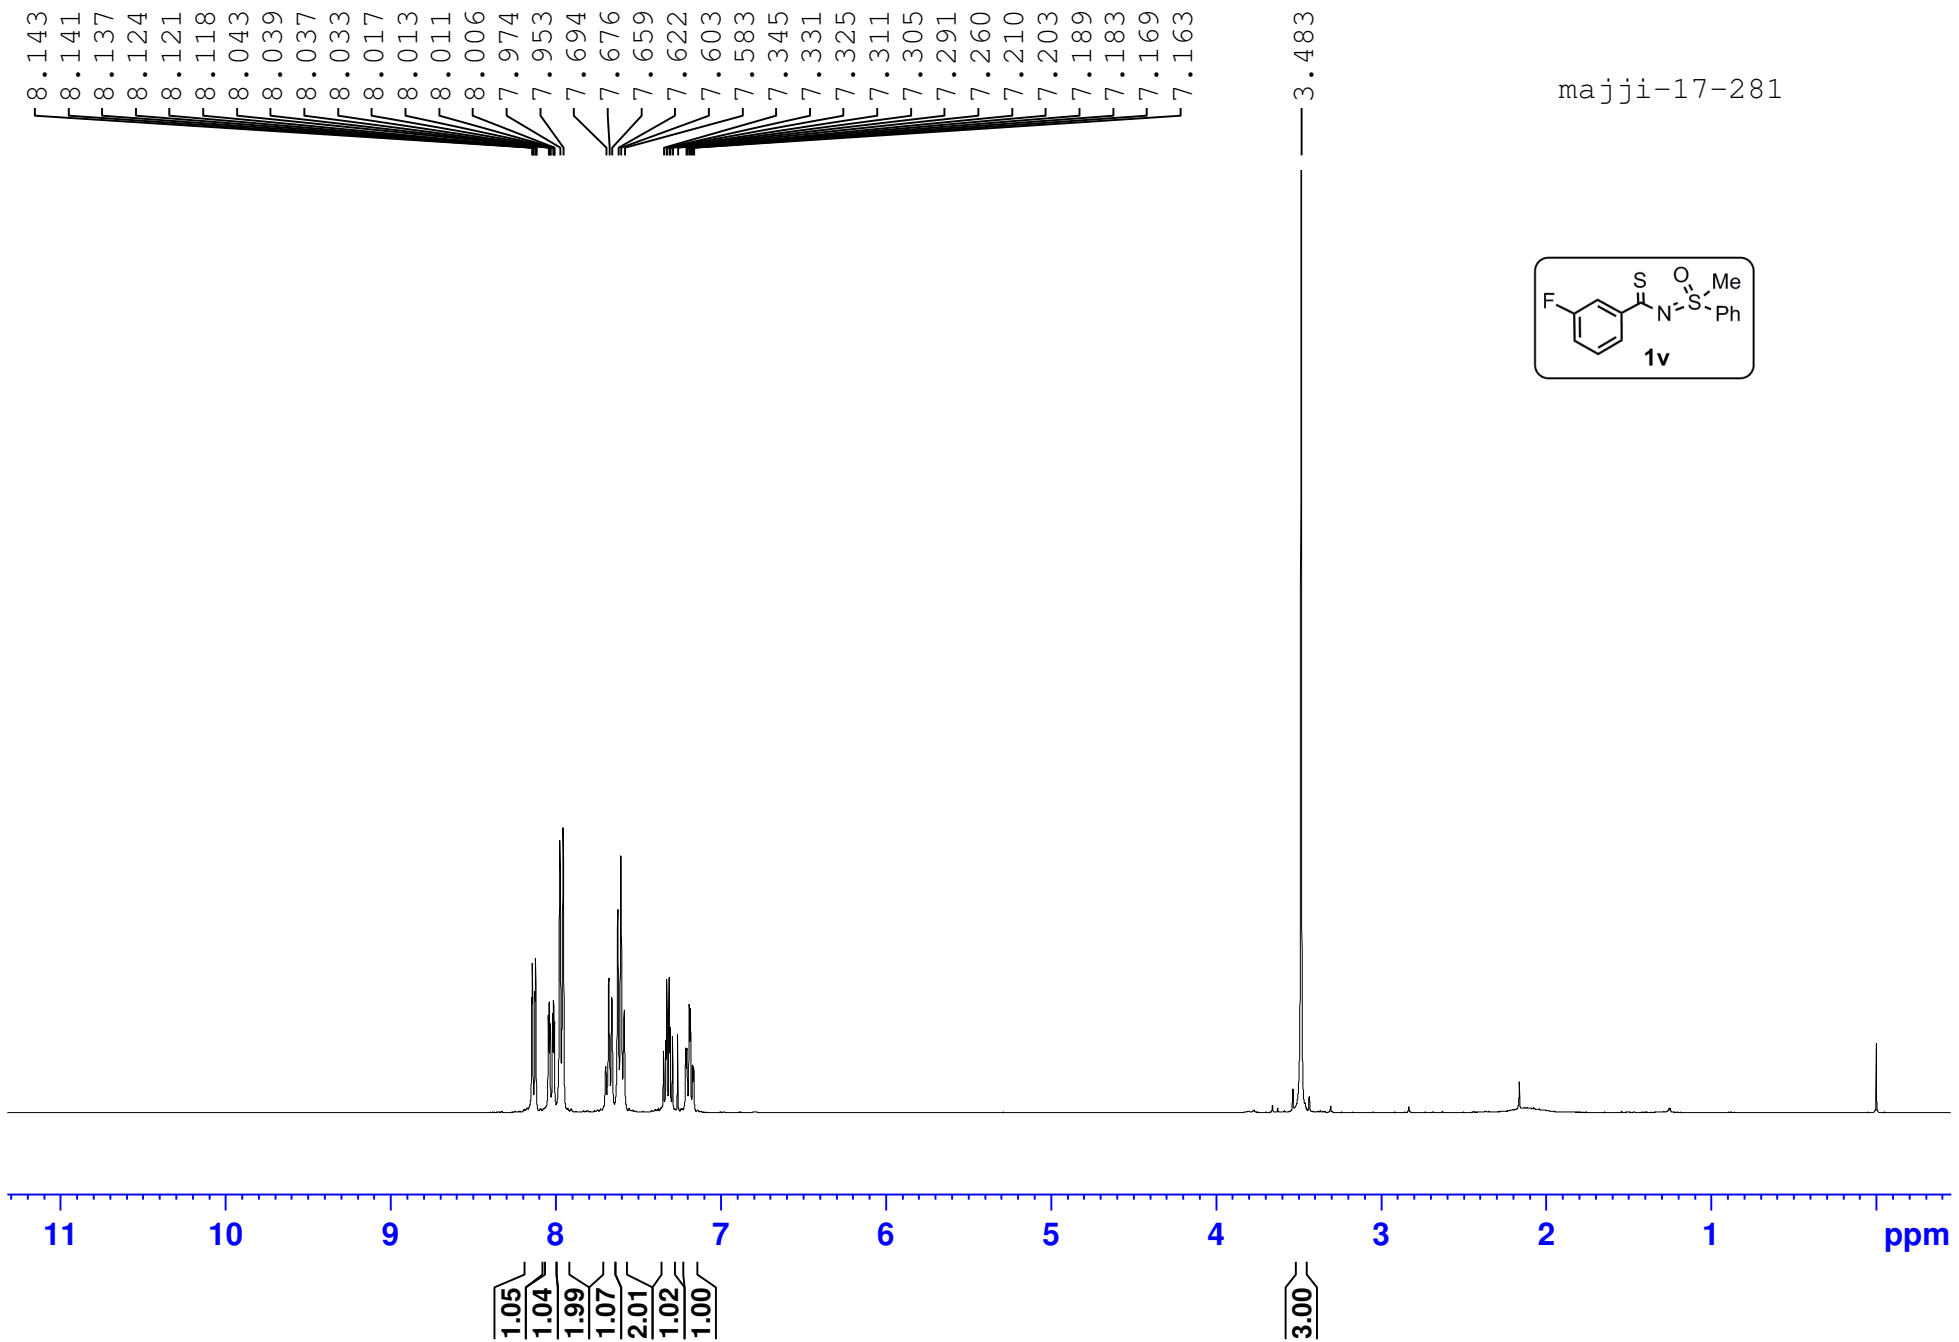

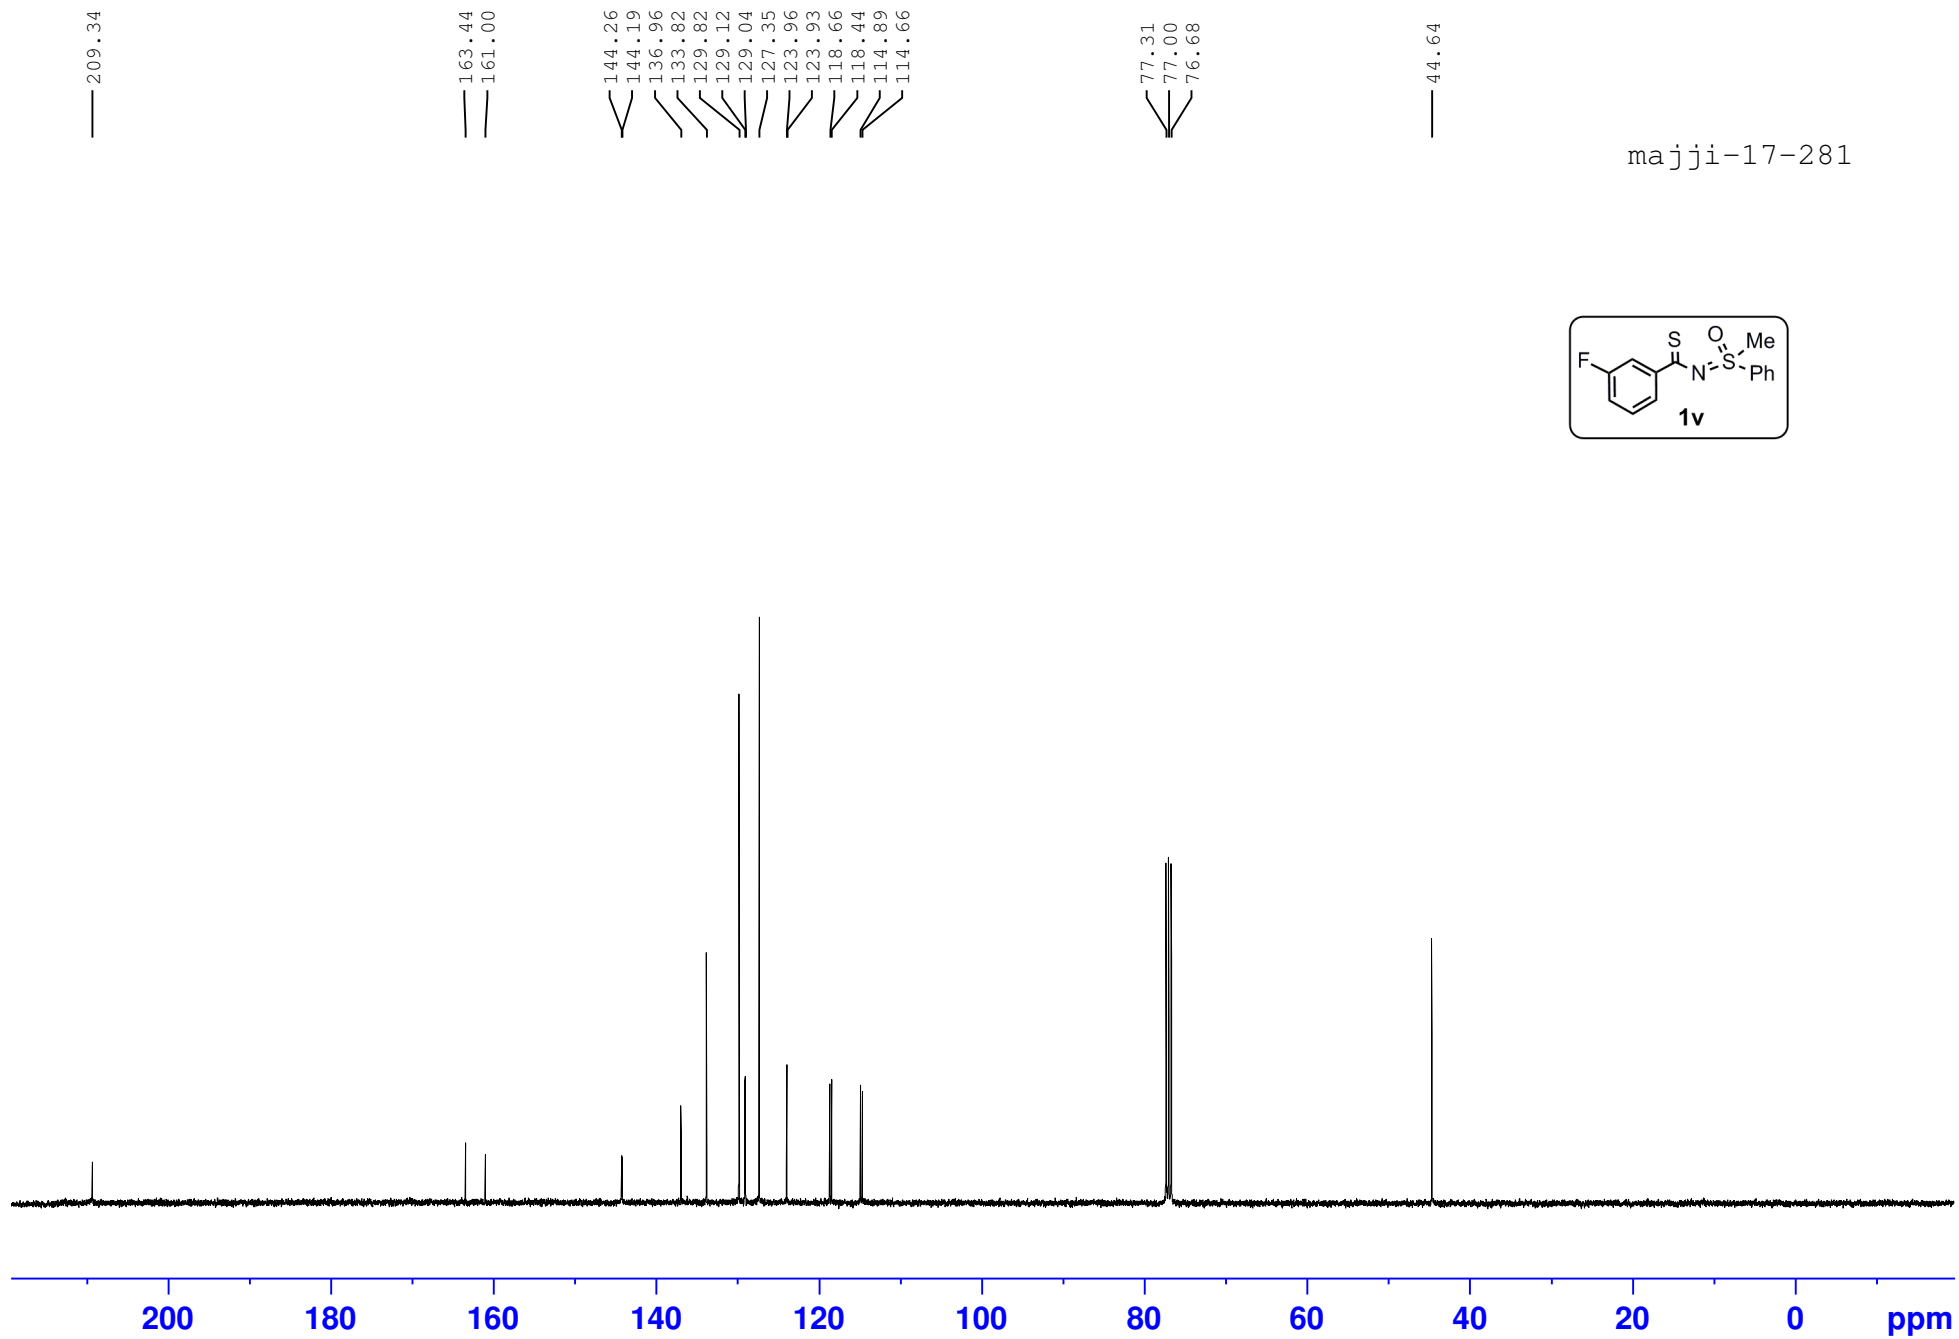

majji-17-281

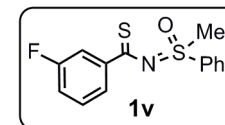

majjji-17-281

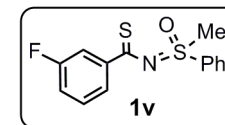

—113.69

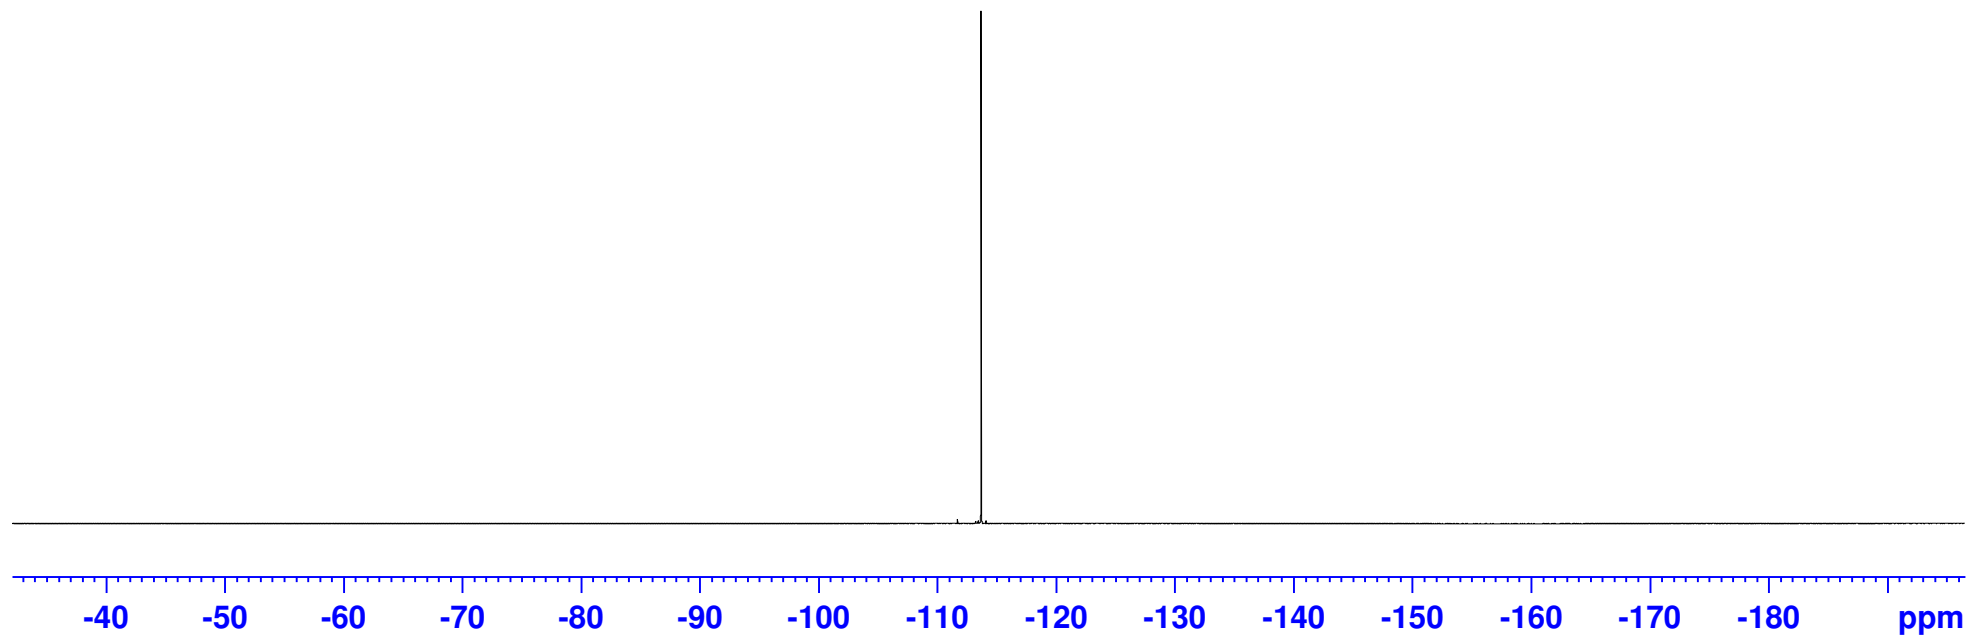

8.314  
8.310  
8.306  
8.234  
8.232  
8.231  
8.229  
8.218  
8.215  
8.213  
7.970  
7.955  
7.696  
7.682  
7.667  
7.625  
7.609  
7.595  
7.471  
7.469  
7.467  
7.465  
7.455  
7.453  
7.451  
7.449  
7.308  
7.292  
7.277  
7.260

3.481

SRS-3-436

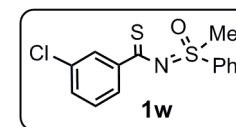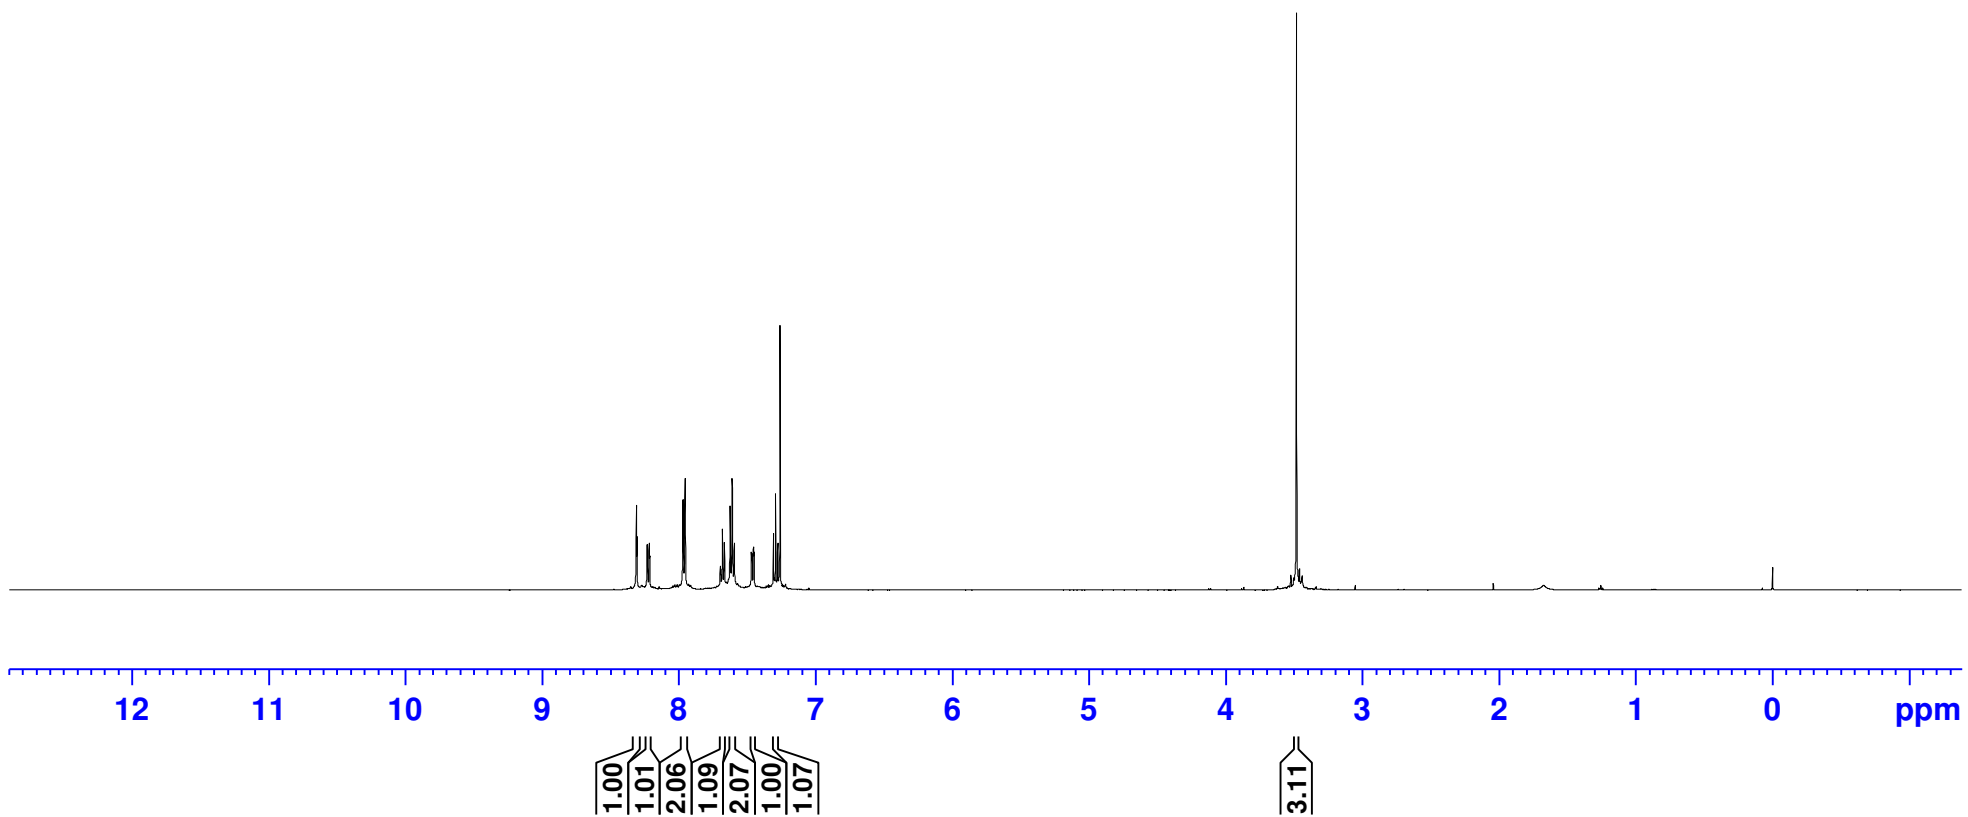



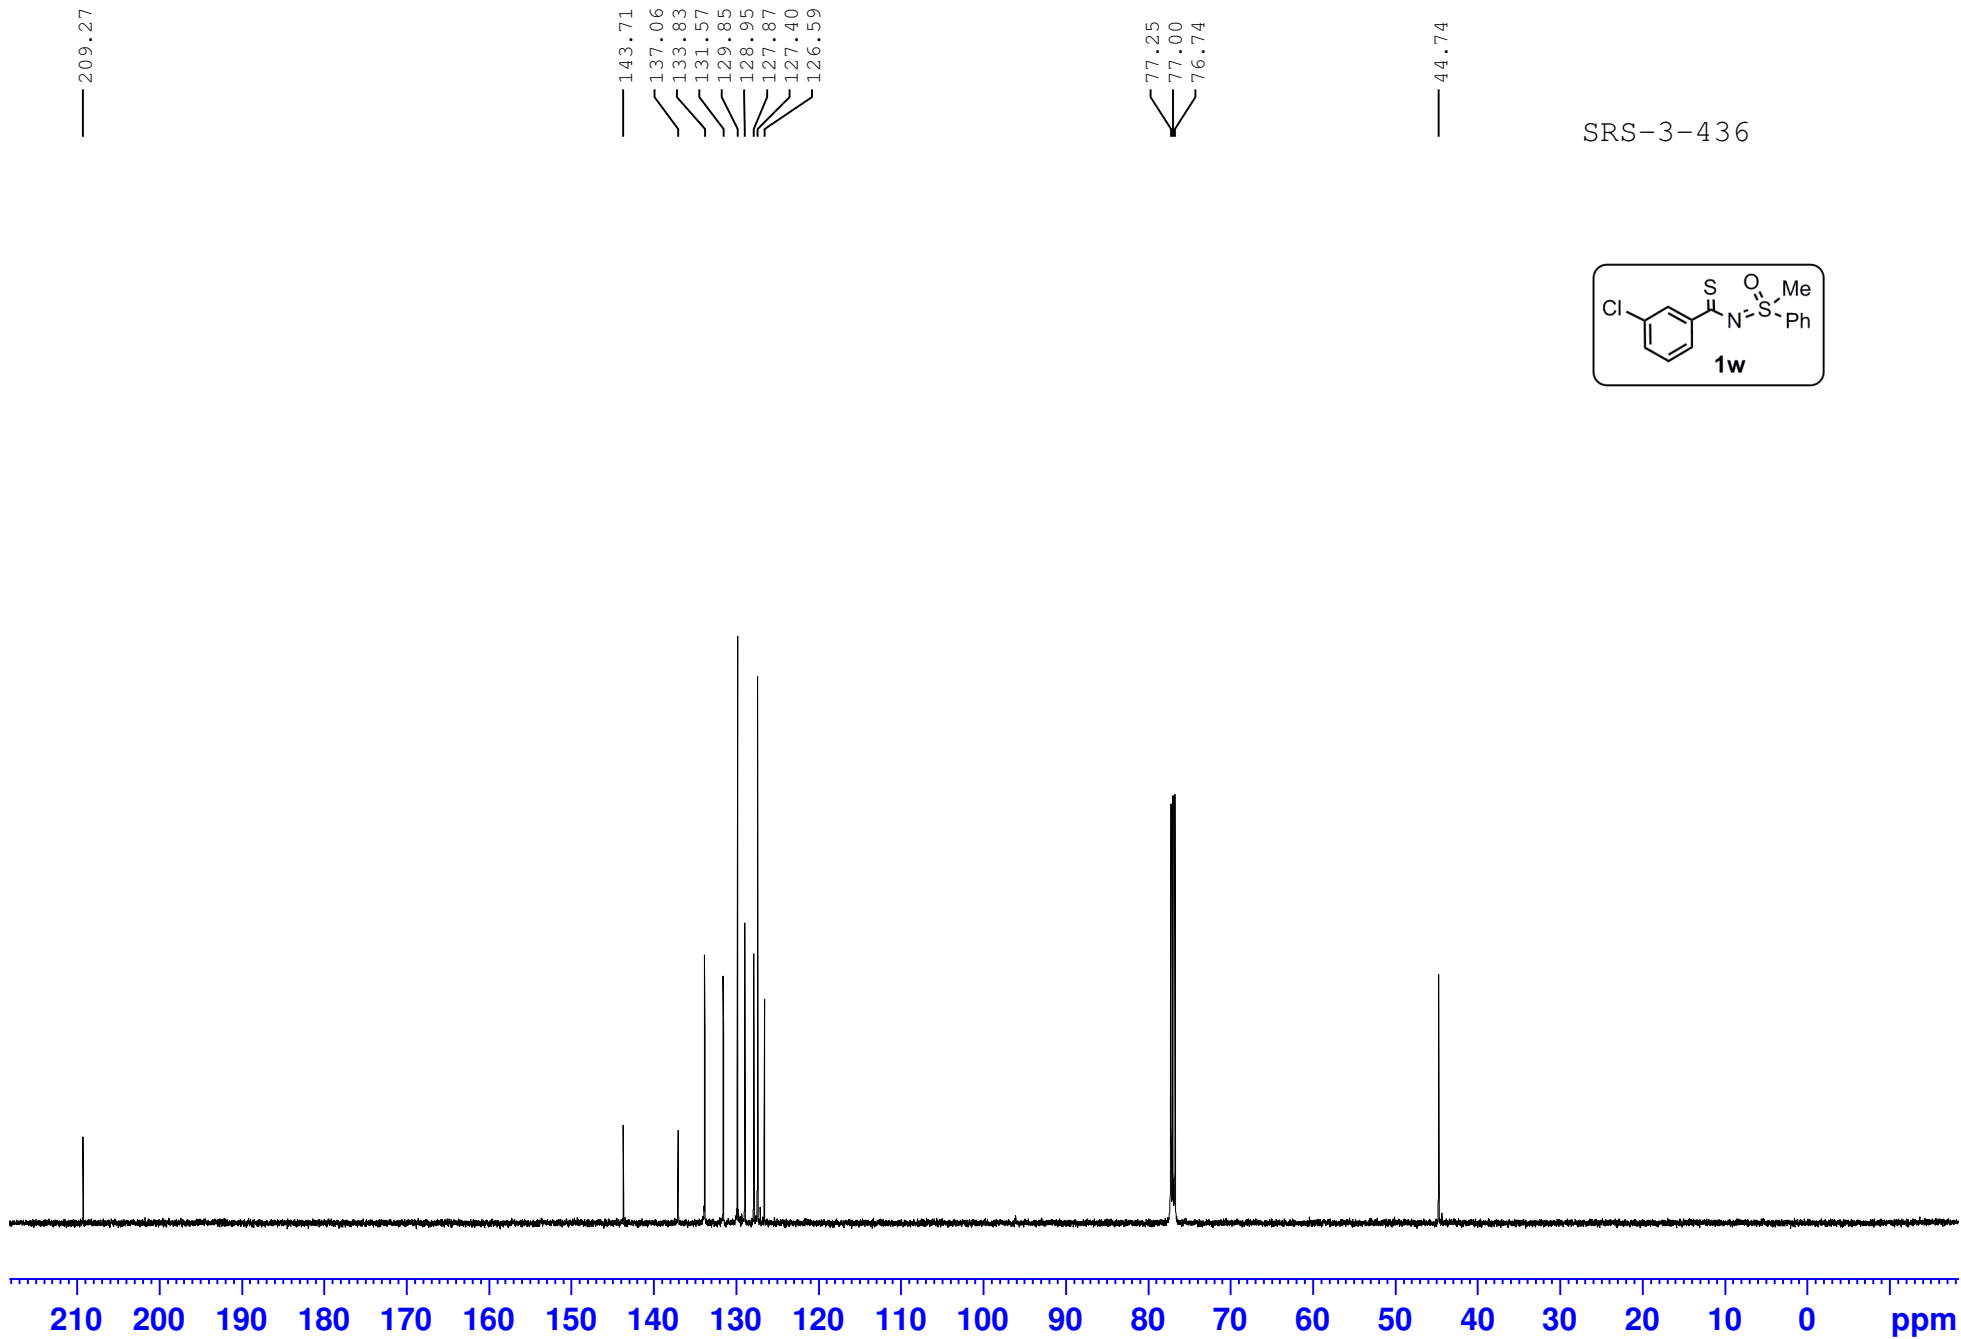

SRS-3-436

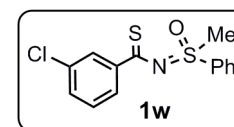

8.139  
8.134  
8.113  
8.108  
8.103  
8.097  
8.083  
8.081  
8.077  
8.076  
7.963  
7.959  
7.945  
7.941  
7.708  
7.690  
7.671  
7.633  
7.617  
7.614  
7.596  
7.593  
7.383  
7.364  
7.344  
7.260

3.488

majji-17-265

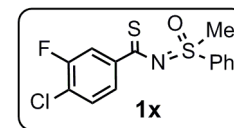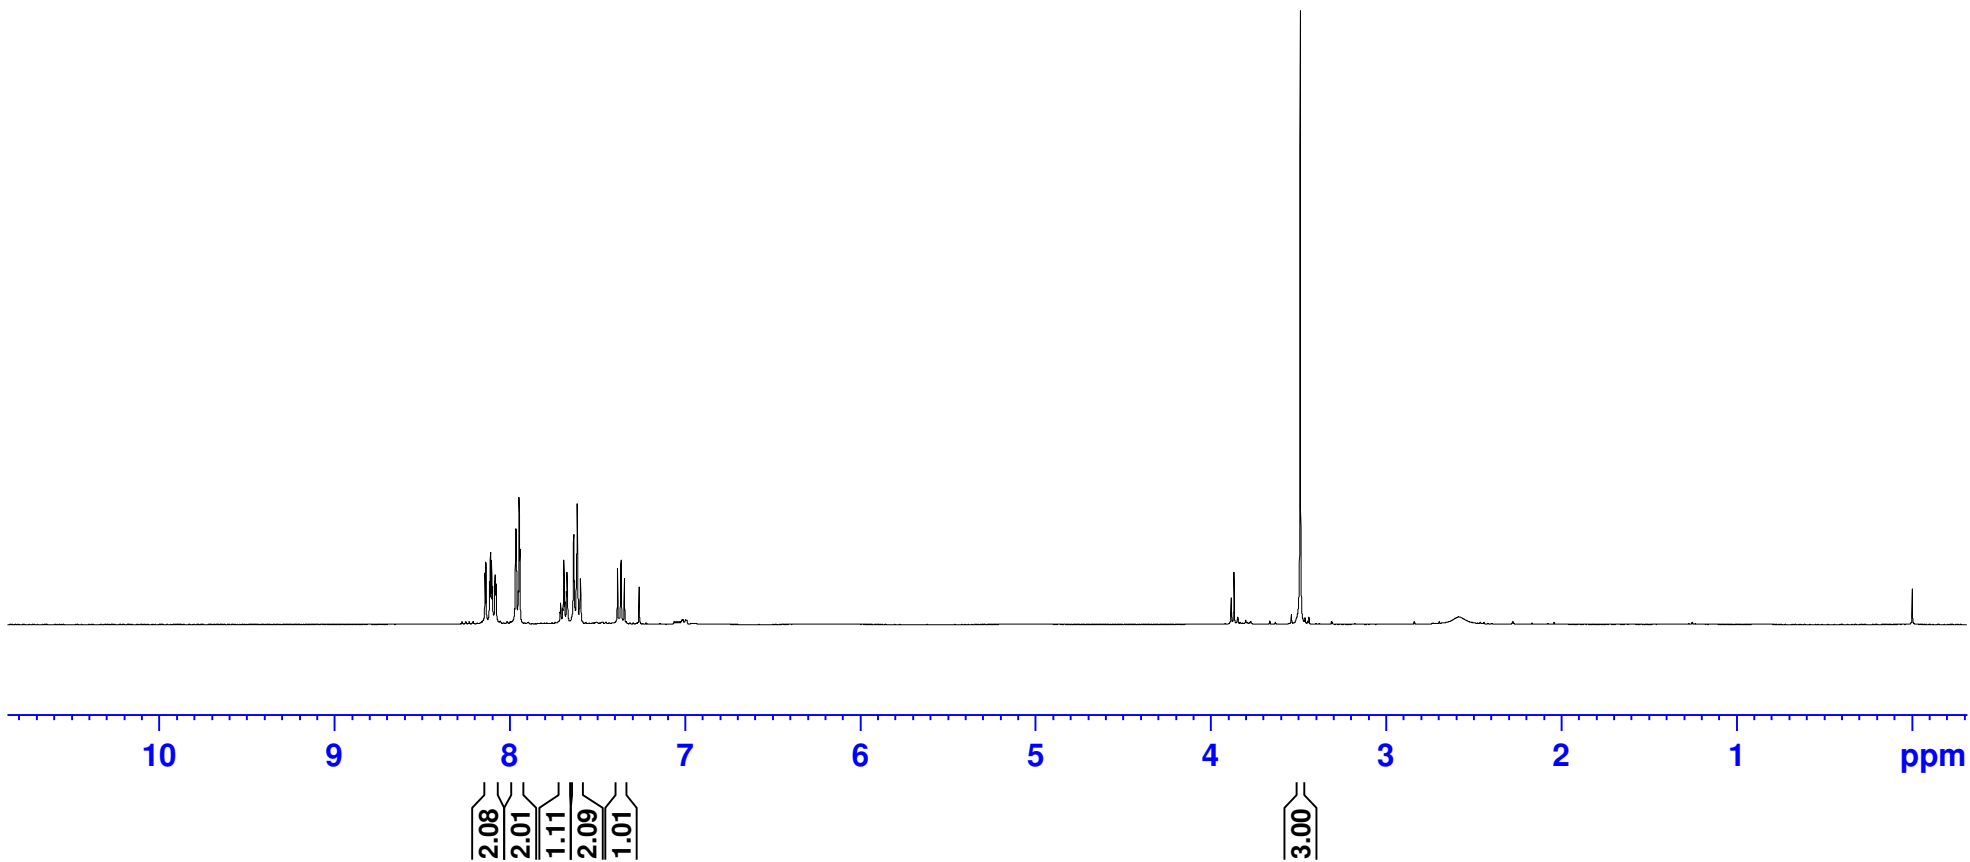

207.86  
207.83

158.52  
156.06

142.38  
142.32  
136.85  
133.93  
129.88  
129.63  
127.35  
125.04  
124.86  
124.60  
124.57  
115.99  
115.76

77.31  
77.00  
76.68

44.67

majji-17-265

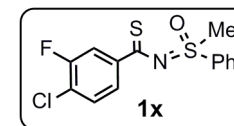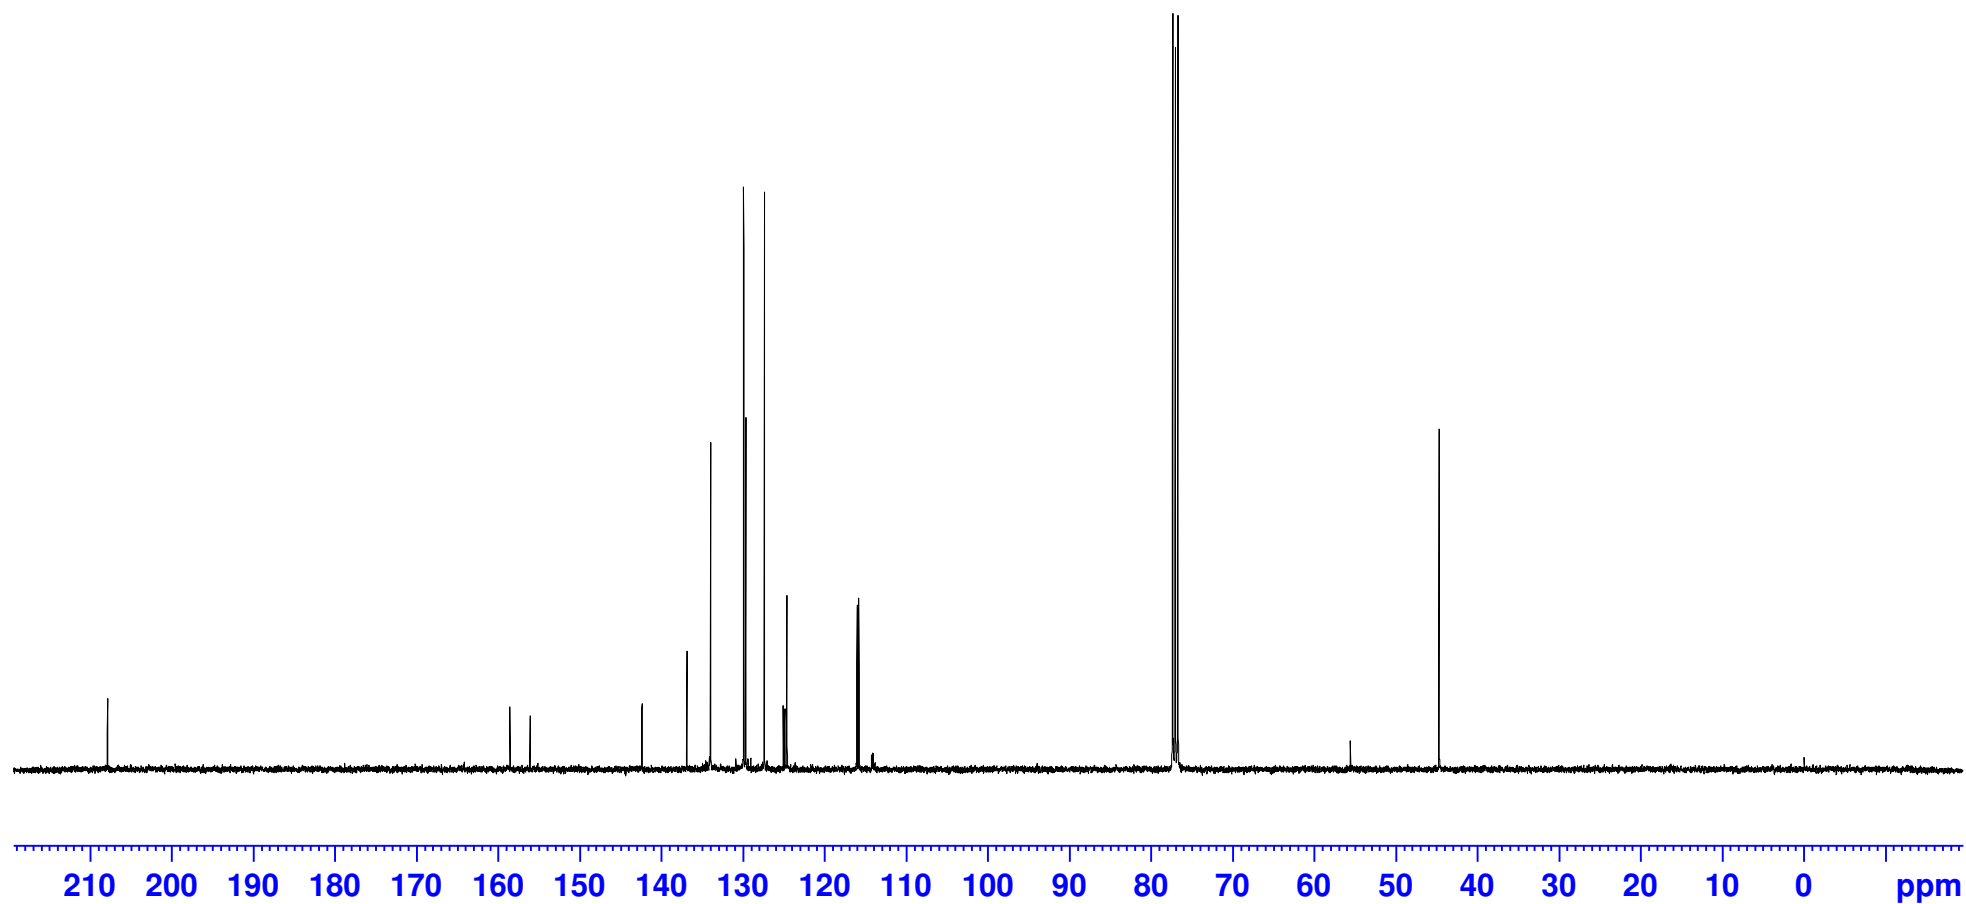

MJ-17-265

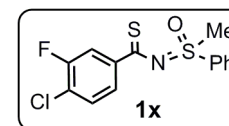

-115.74

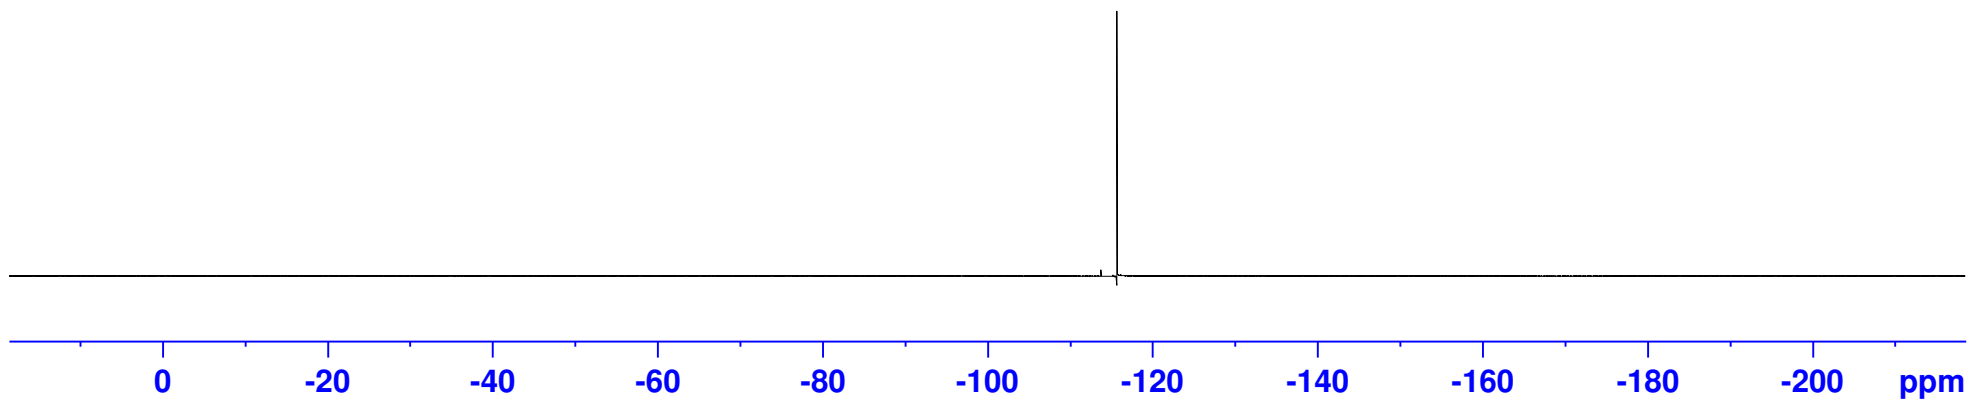

majji-17-281

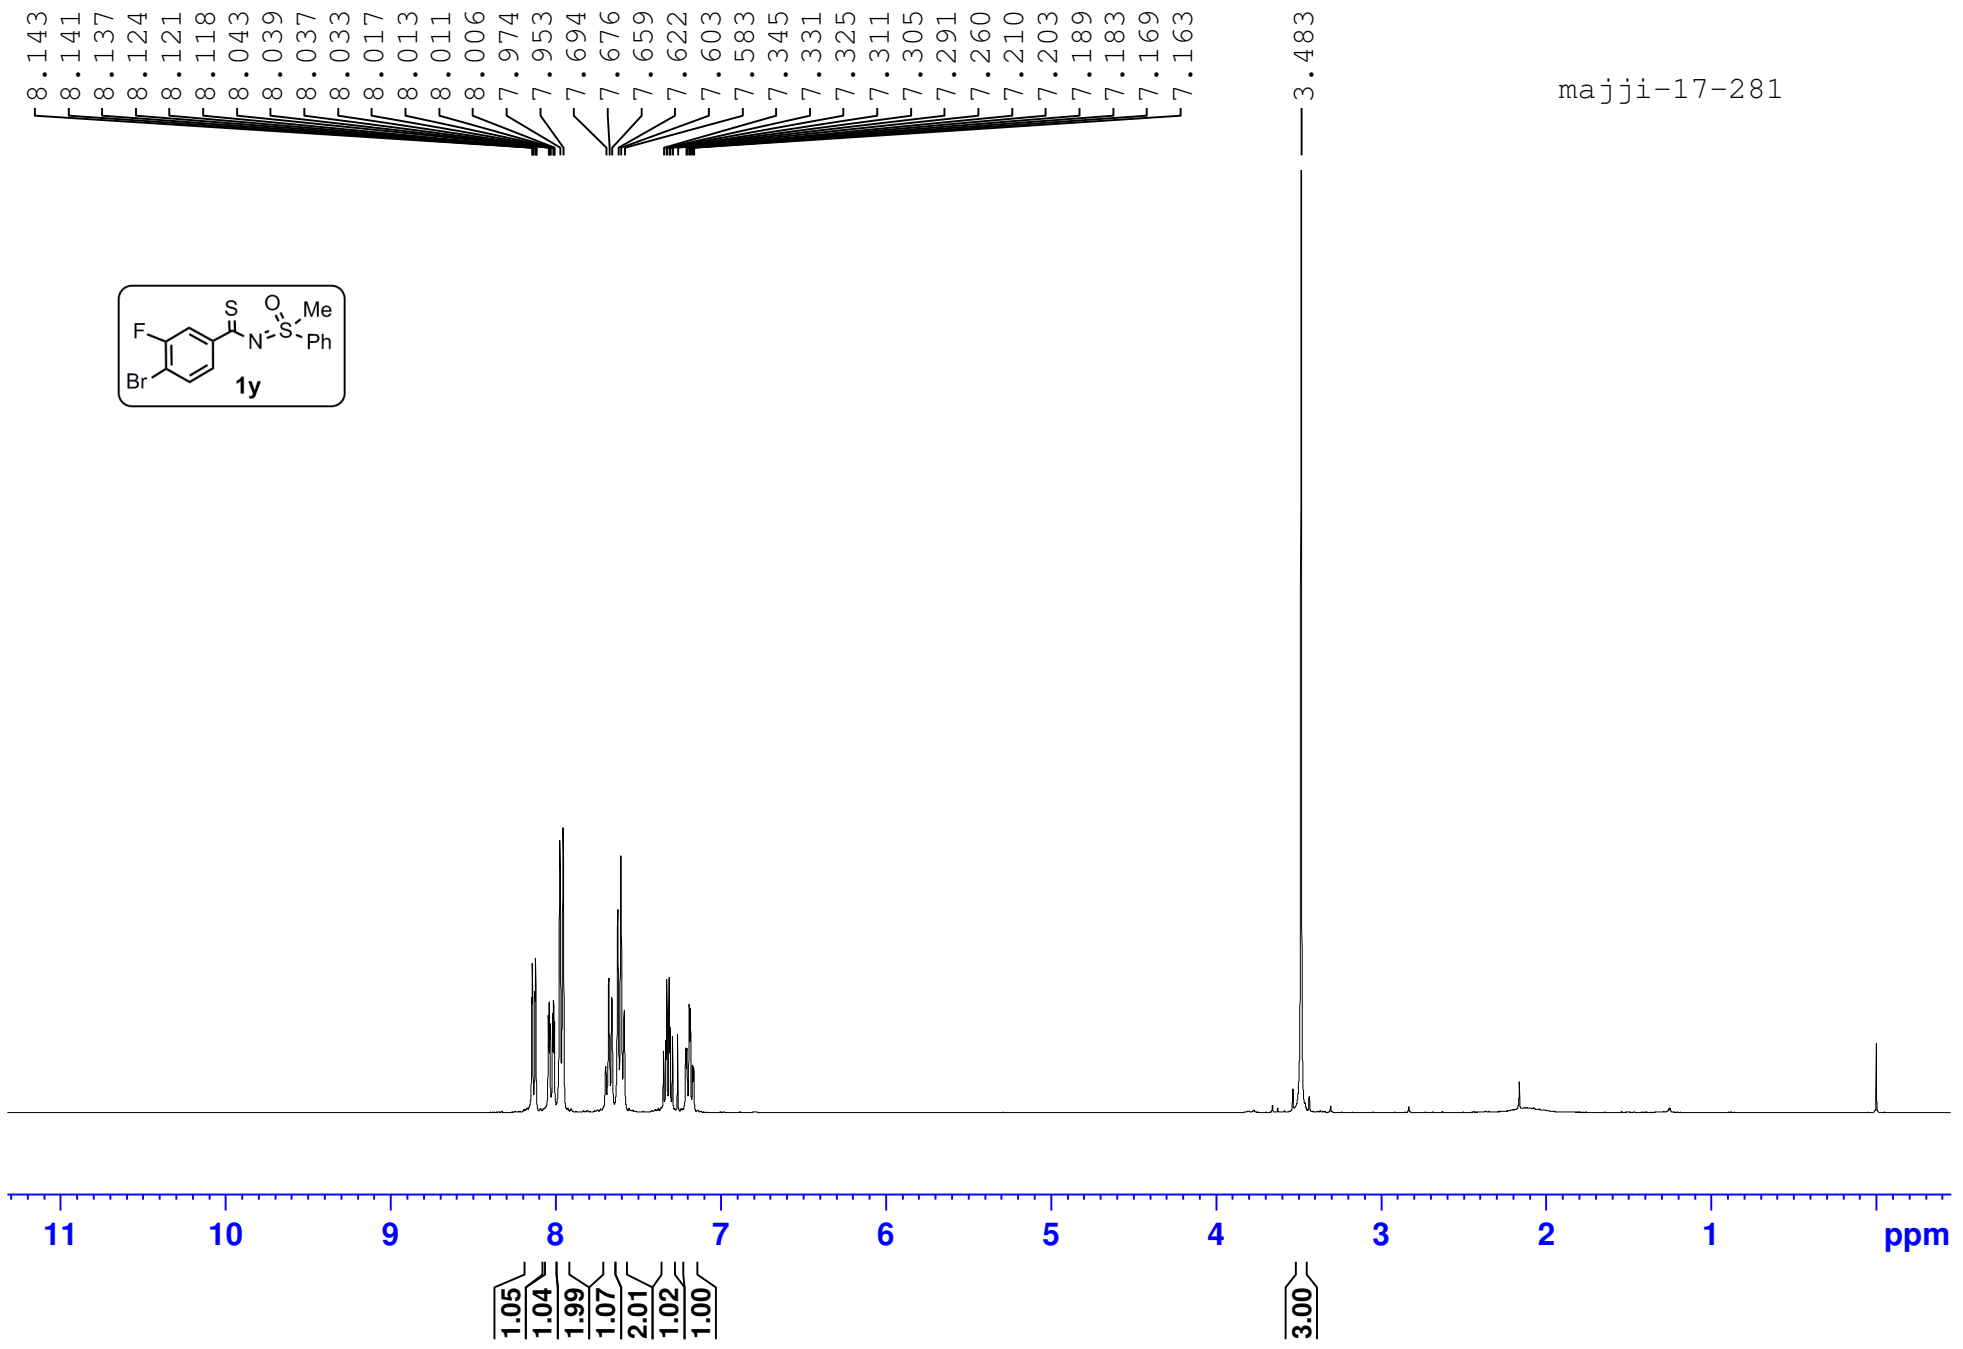

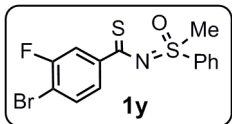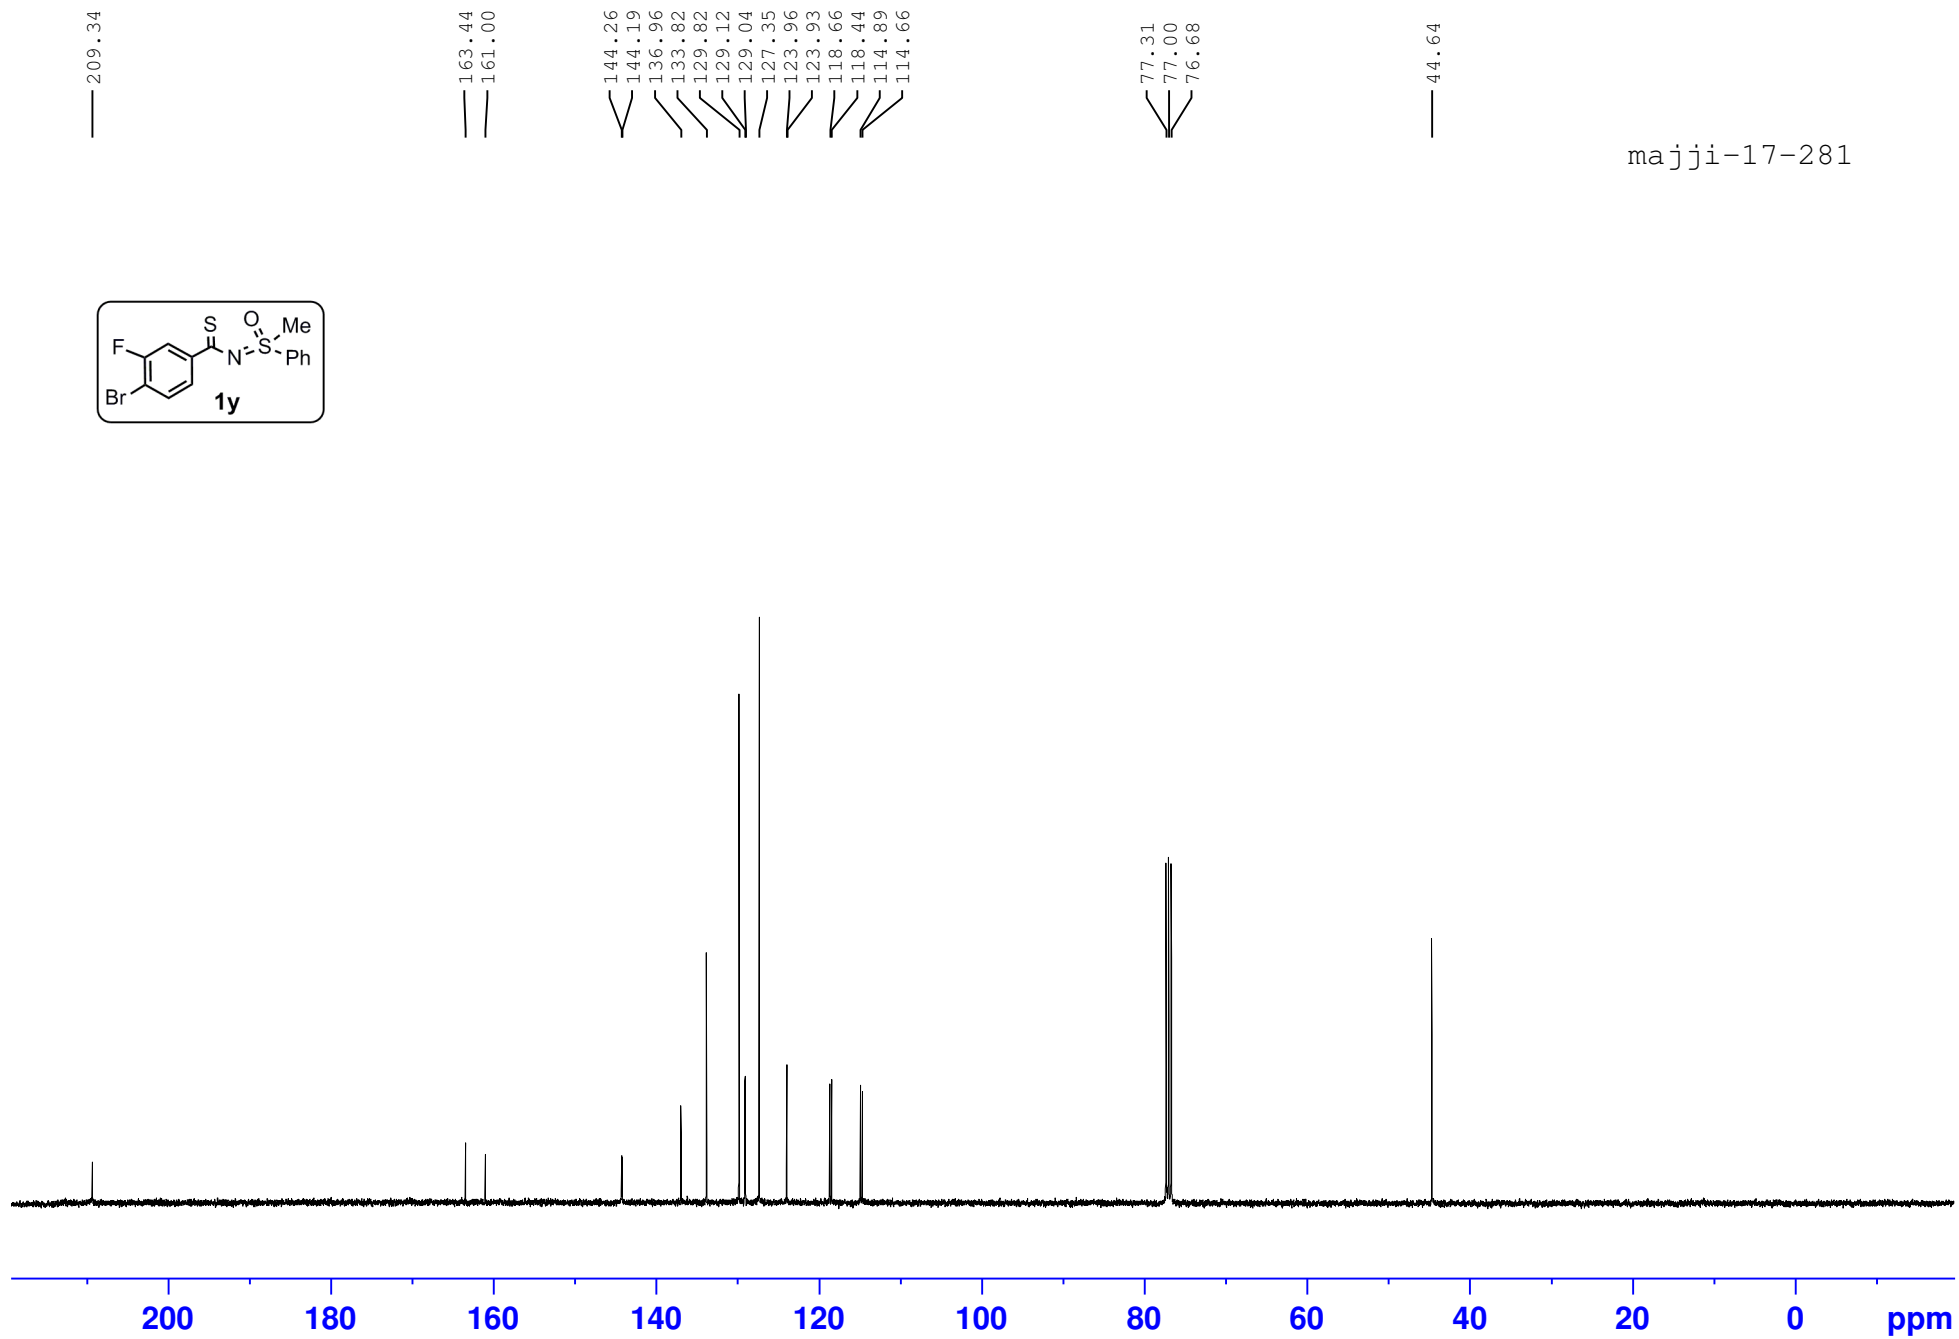

majji-17-281

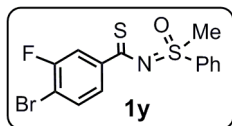

—113.69

majji-17-281

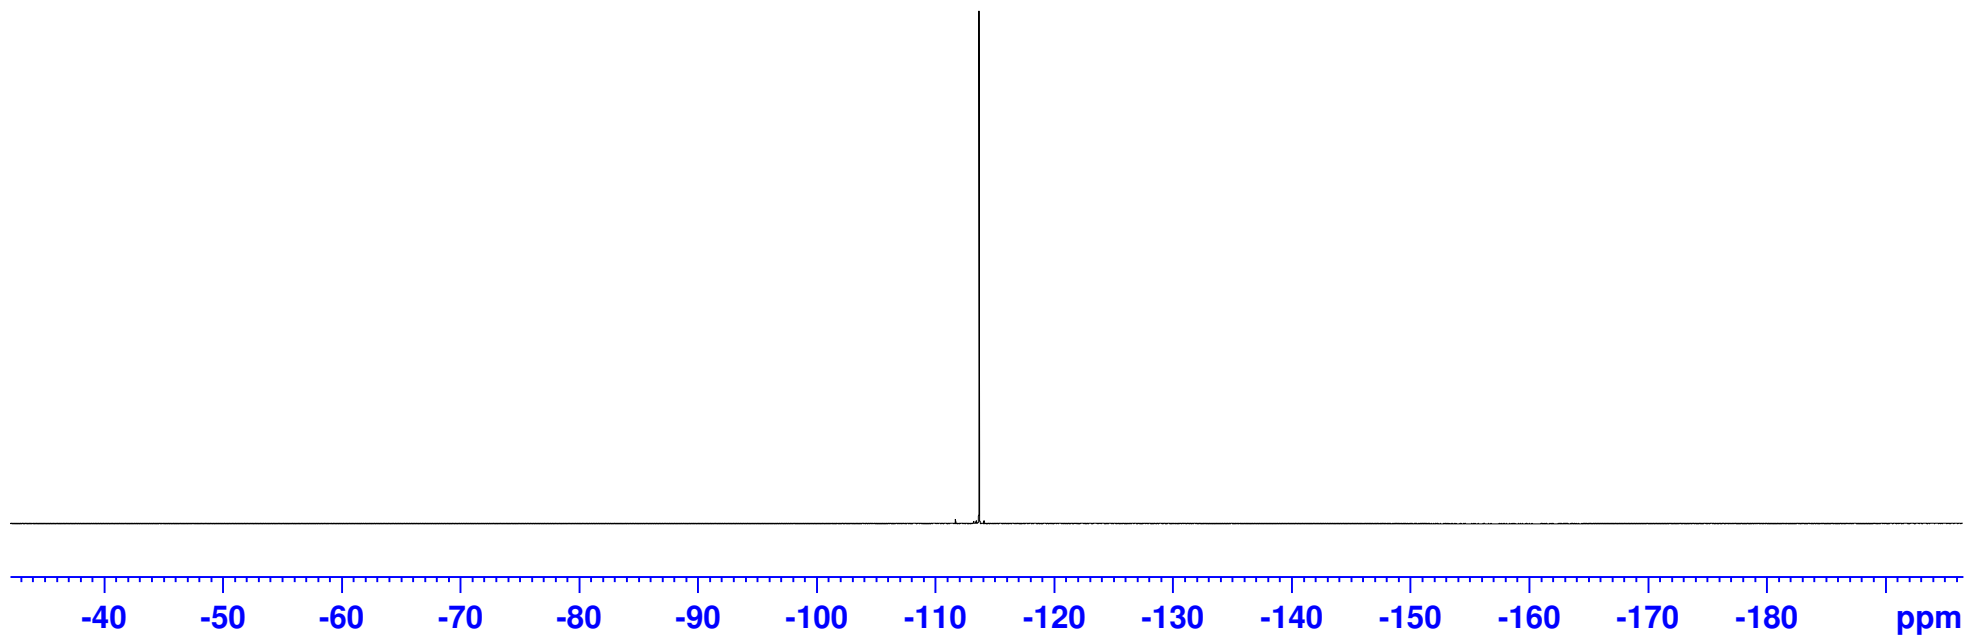

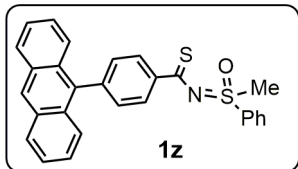

8.590  
8.569  
8.512  
8.085  
8.063  
8.041  
7.708  
7.695  
7.673  
7.672  
7.650  
7.633  
7.630  
7.484  
7.474  
7.470  
7.454  
7.449  
7.374  
7.372  
7.357  
7.353  
7.350  
7.335  
7.333  
7.260

— 3.557

k-5-145

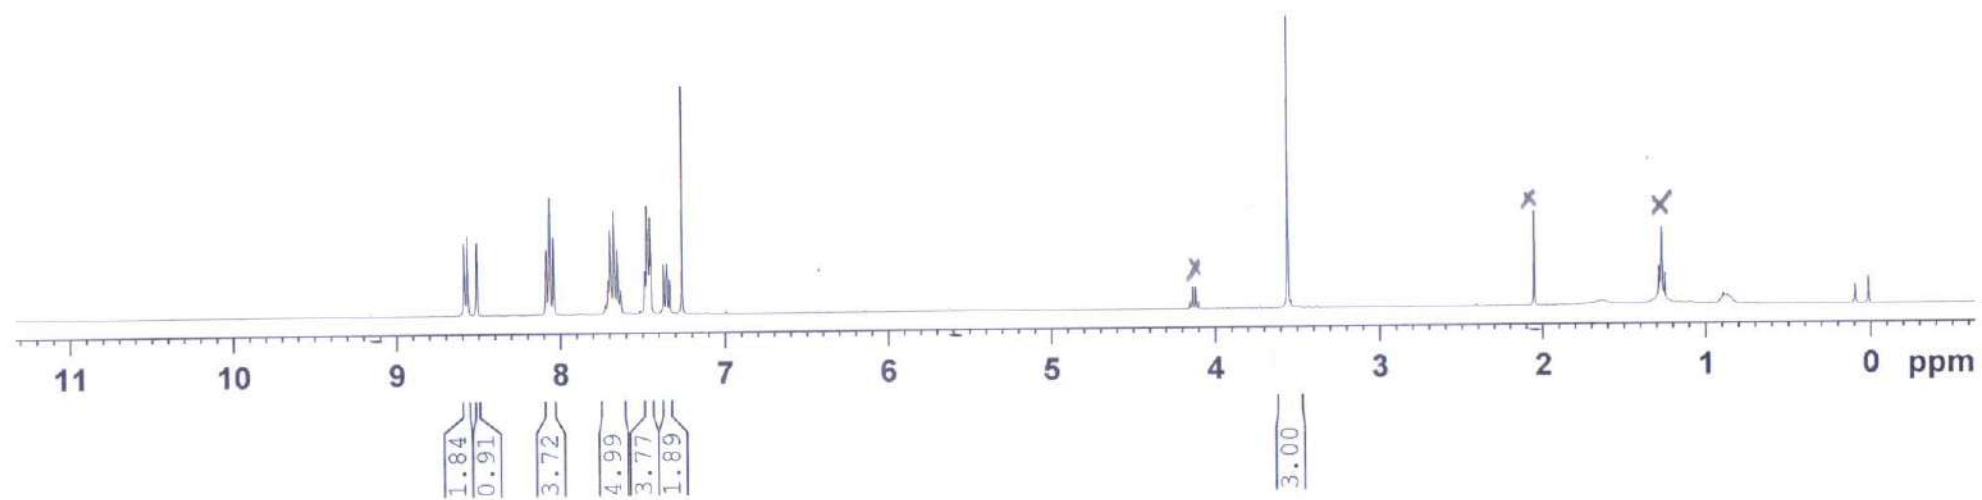



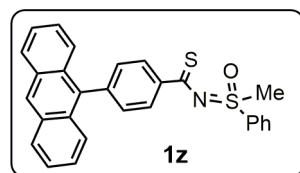

— 210.92

142.91  
141.56  
137.45  
136.16  
133.76  
131.26  
130.86  
129.87  
129.83  
128.34  
128.22  
127.48  
126.85  
126.60  
125.49  
125.14

77.31  
77.00  
76.68

— 44.77

k-5-145

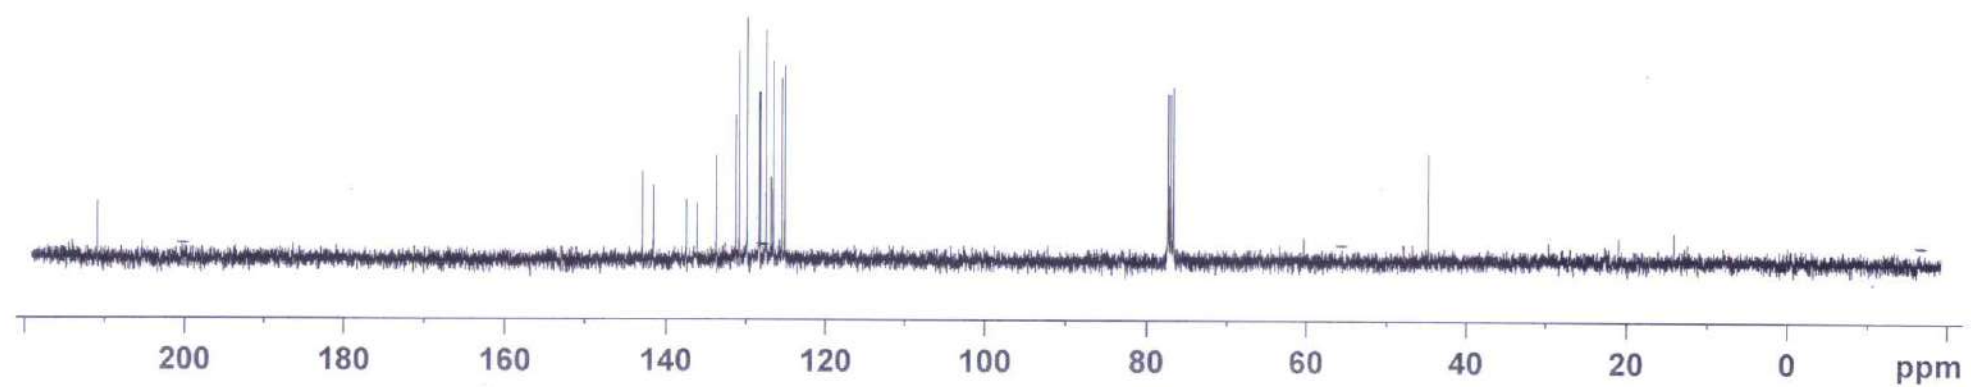

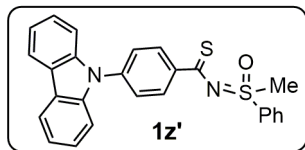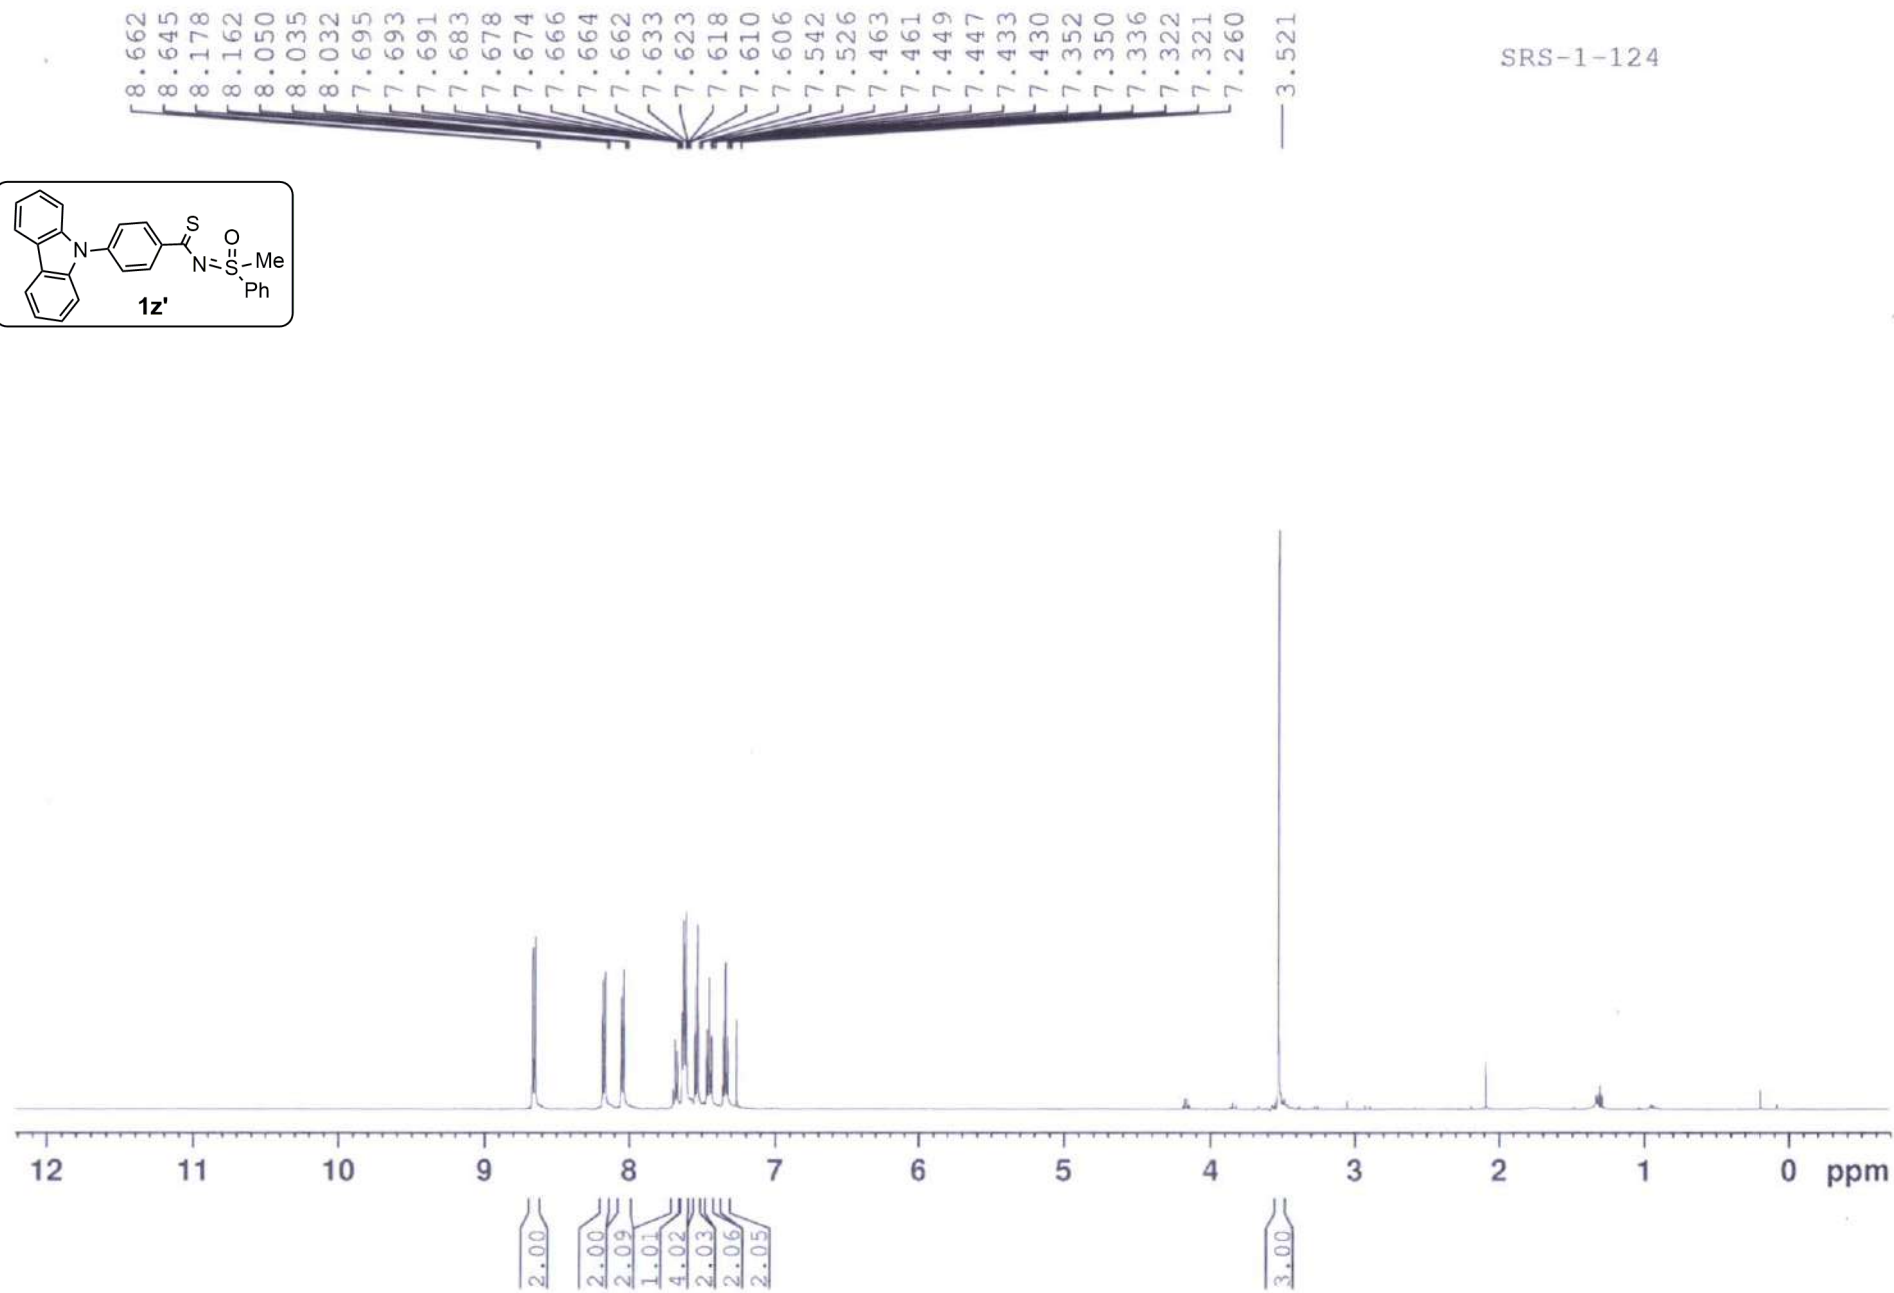

SRS-1-124

— 209.44

SRS-1-124

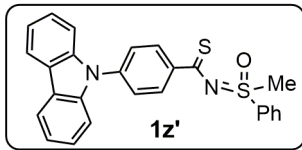

140.94  
140.64  
140.13  
137.08  
133.66  
129.76  
129.69  
127.25  
125.95  
125.44  
123.51  
120.21

— 109.74

77.25  
77.20  
77.00  
76.74

— 44.48

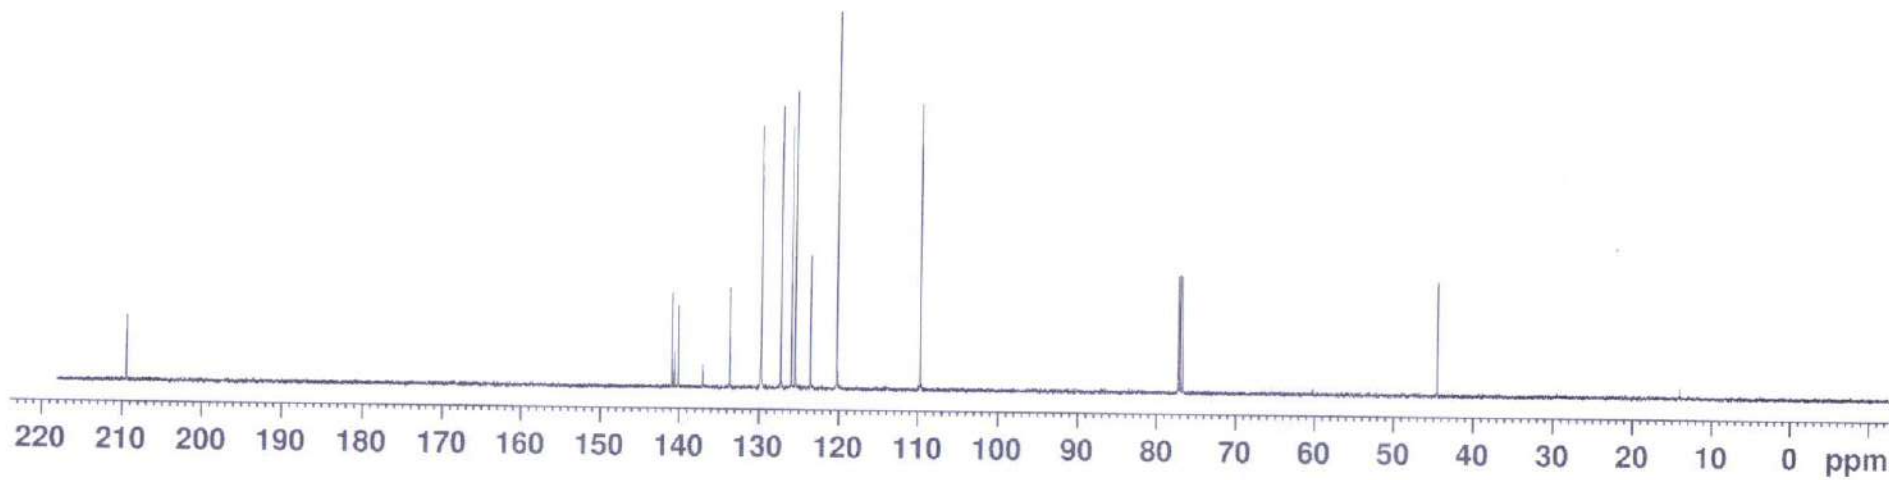

8.392  
8.370  
7.990  
7.972  
7.692  
7.673  
7.655  
7.623  
7.606  
7.603  
7.585  
7.260  
6.994  
6.972

3.490

Majji MJ-DIPMS

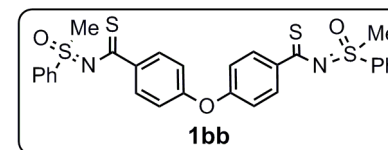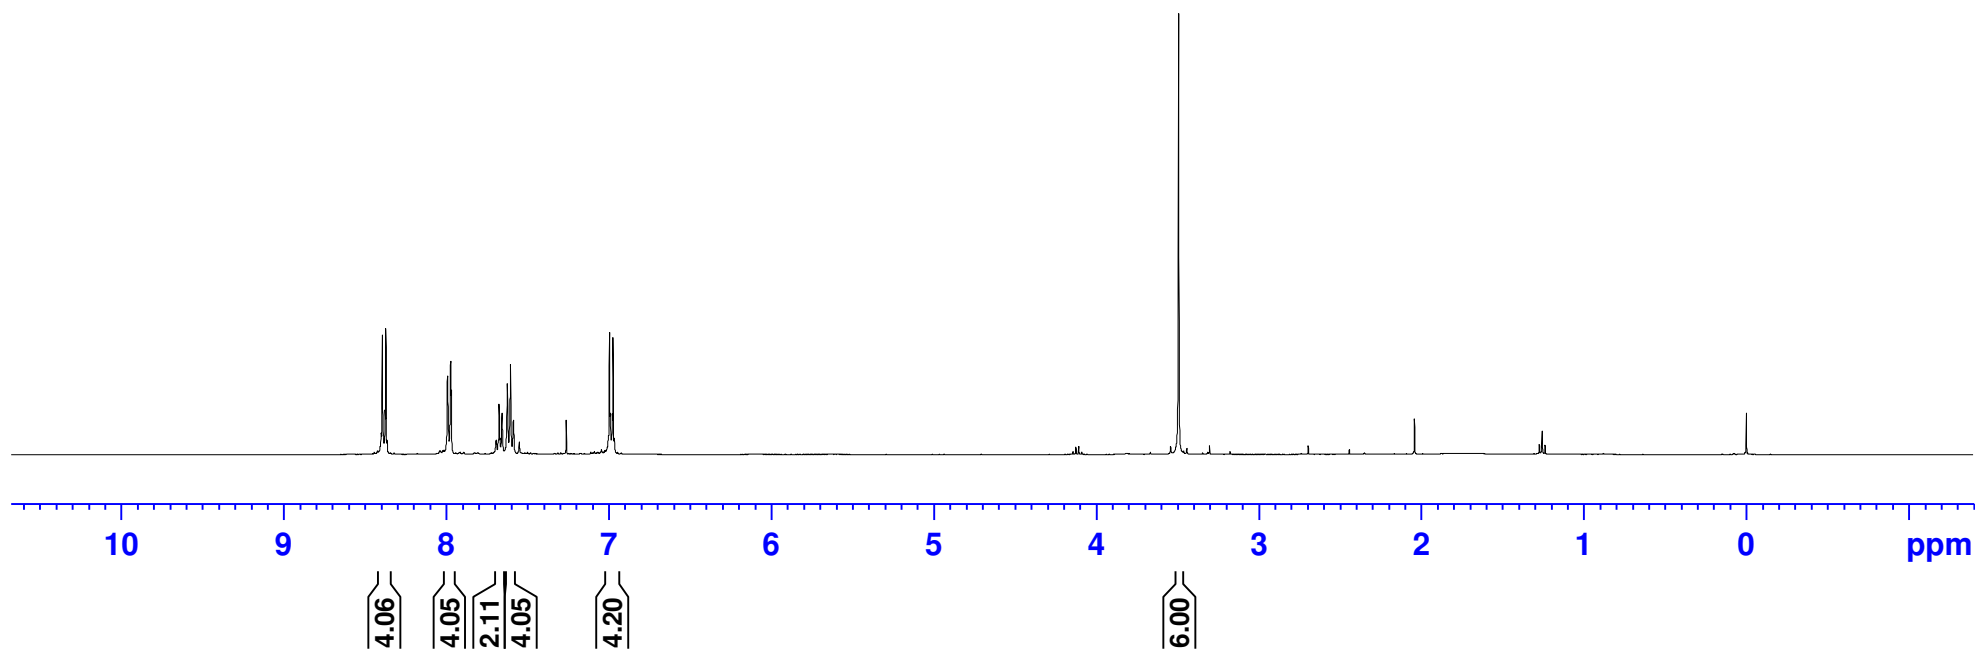

209.56

159.99

137.99  
137.48  
133.69  
130.41  
129.79  
127.37

117.83

77.31  
77.00  
76.68

44.71

Majji MJ-DIPMS

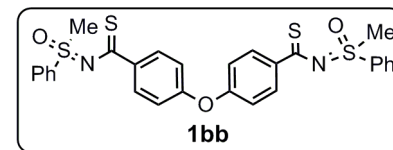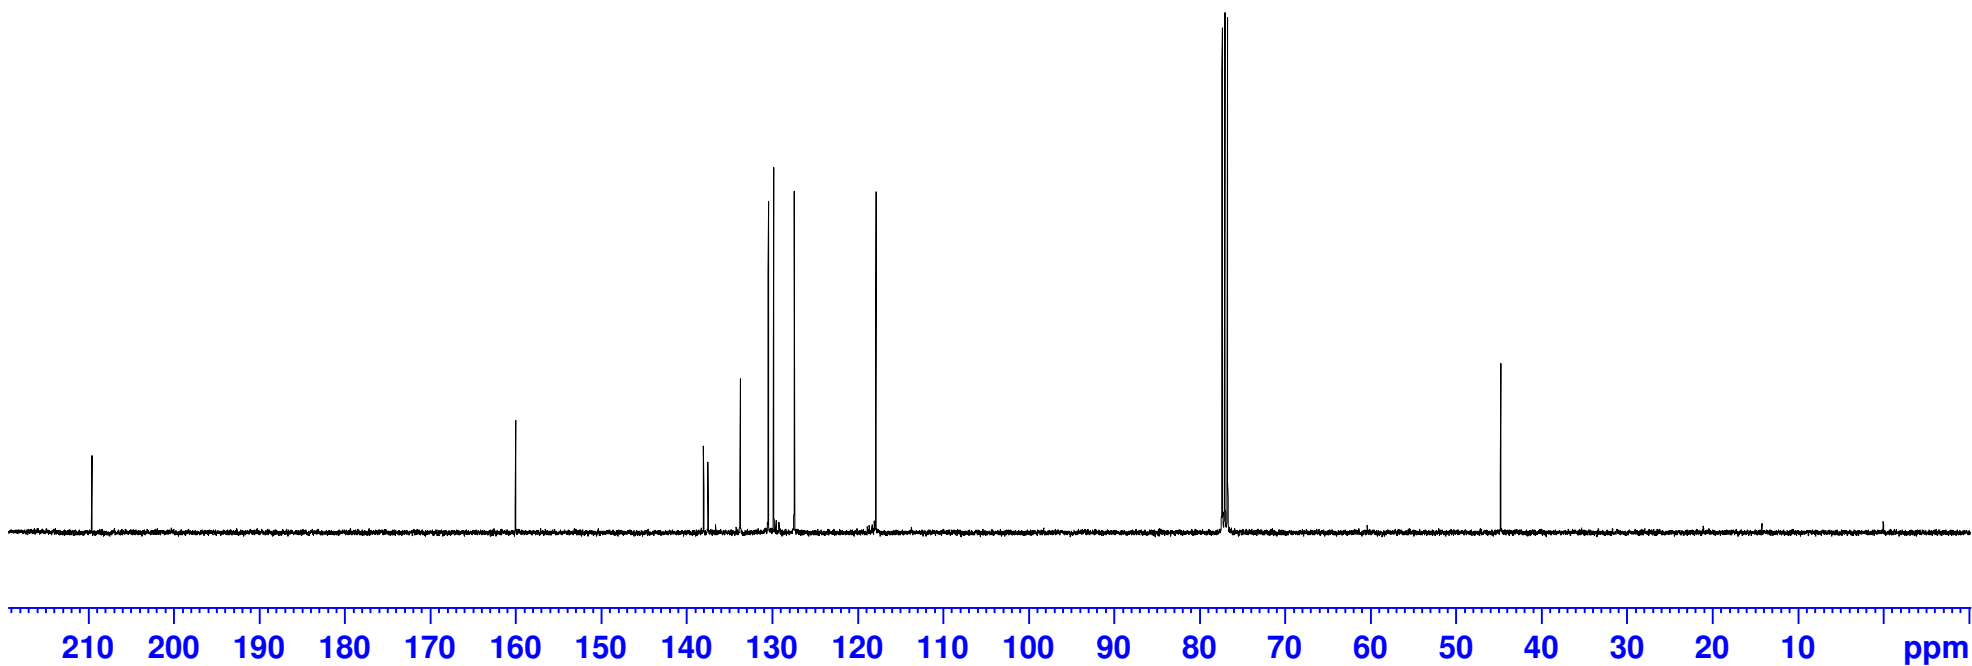

8.372  
8.350  
8.015  
7.994  
7.971  
7.704  
7.685  
7.667  
7.632  
7.612  
7.593  
7.260  
5.114  
5.096  
5.078  
4.390  
4.382  
4.375  
4.364  
4.357  
4.347  
3.503  
2.029  
2.007  
1.984  
1.966  
1.848  
1.836  
1.815  
1.803  
1.674  
1.601  
1.431  
1.418  
1.398  
1.376  
1.368  
1.361  
1.282  
1.263  
1.251  
1.244  
1.225  
1.210  
0.979  
0.963  
0.876  
0.864  
0.848  
0.838  
0.827

AS-384

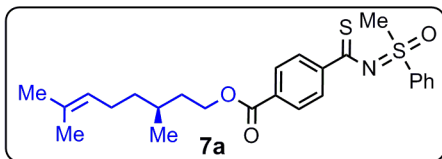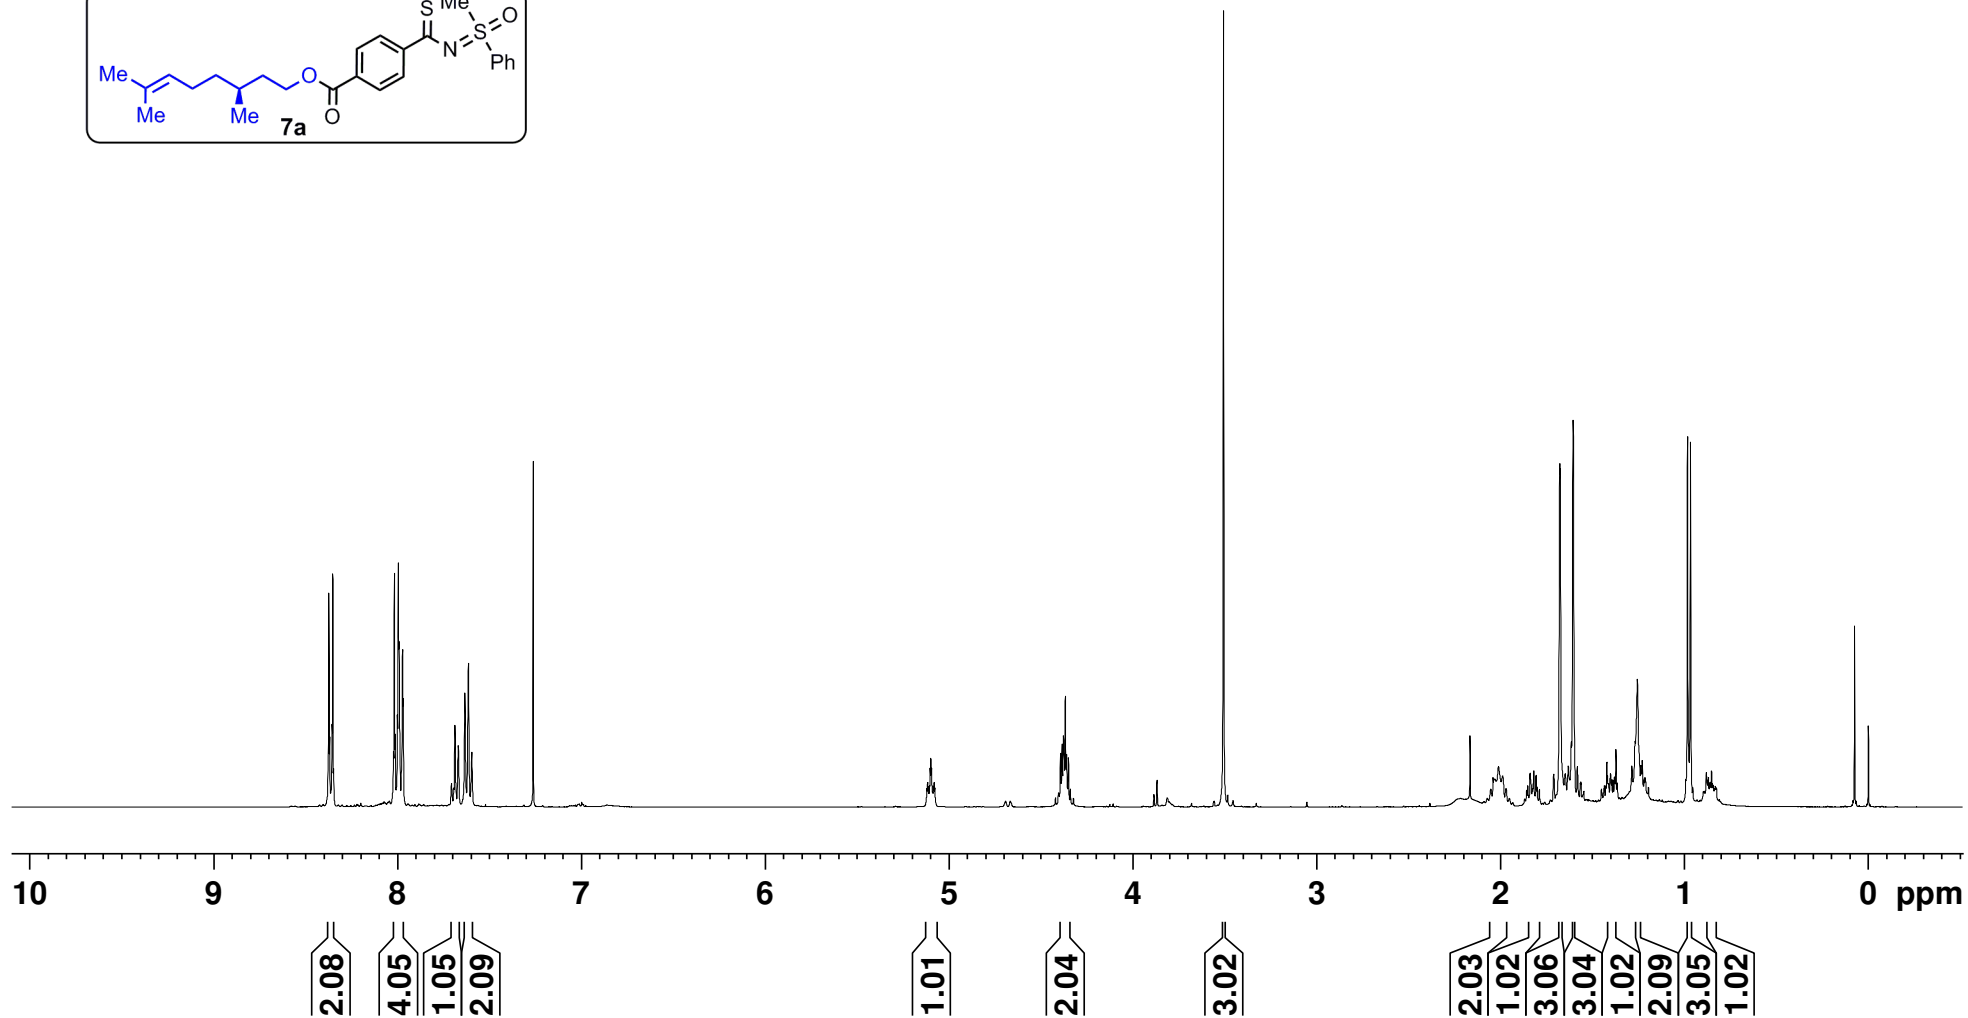

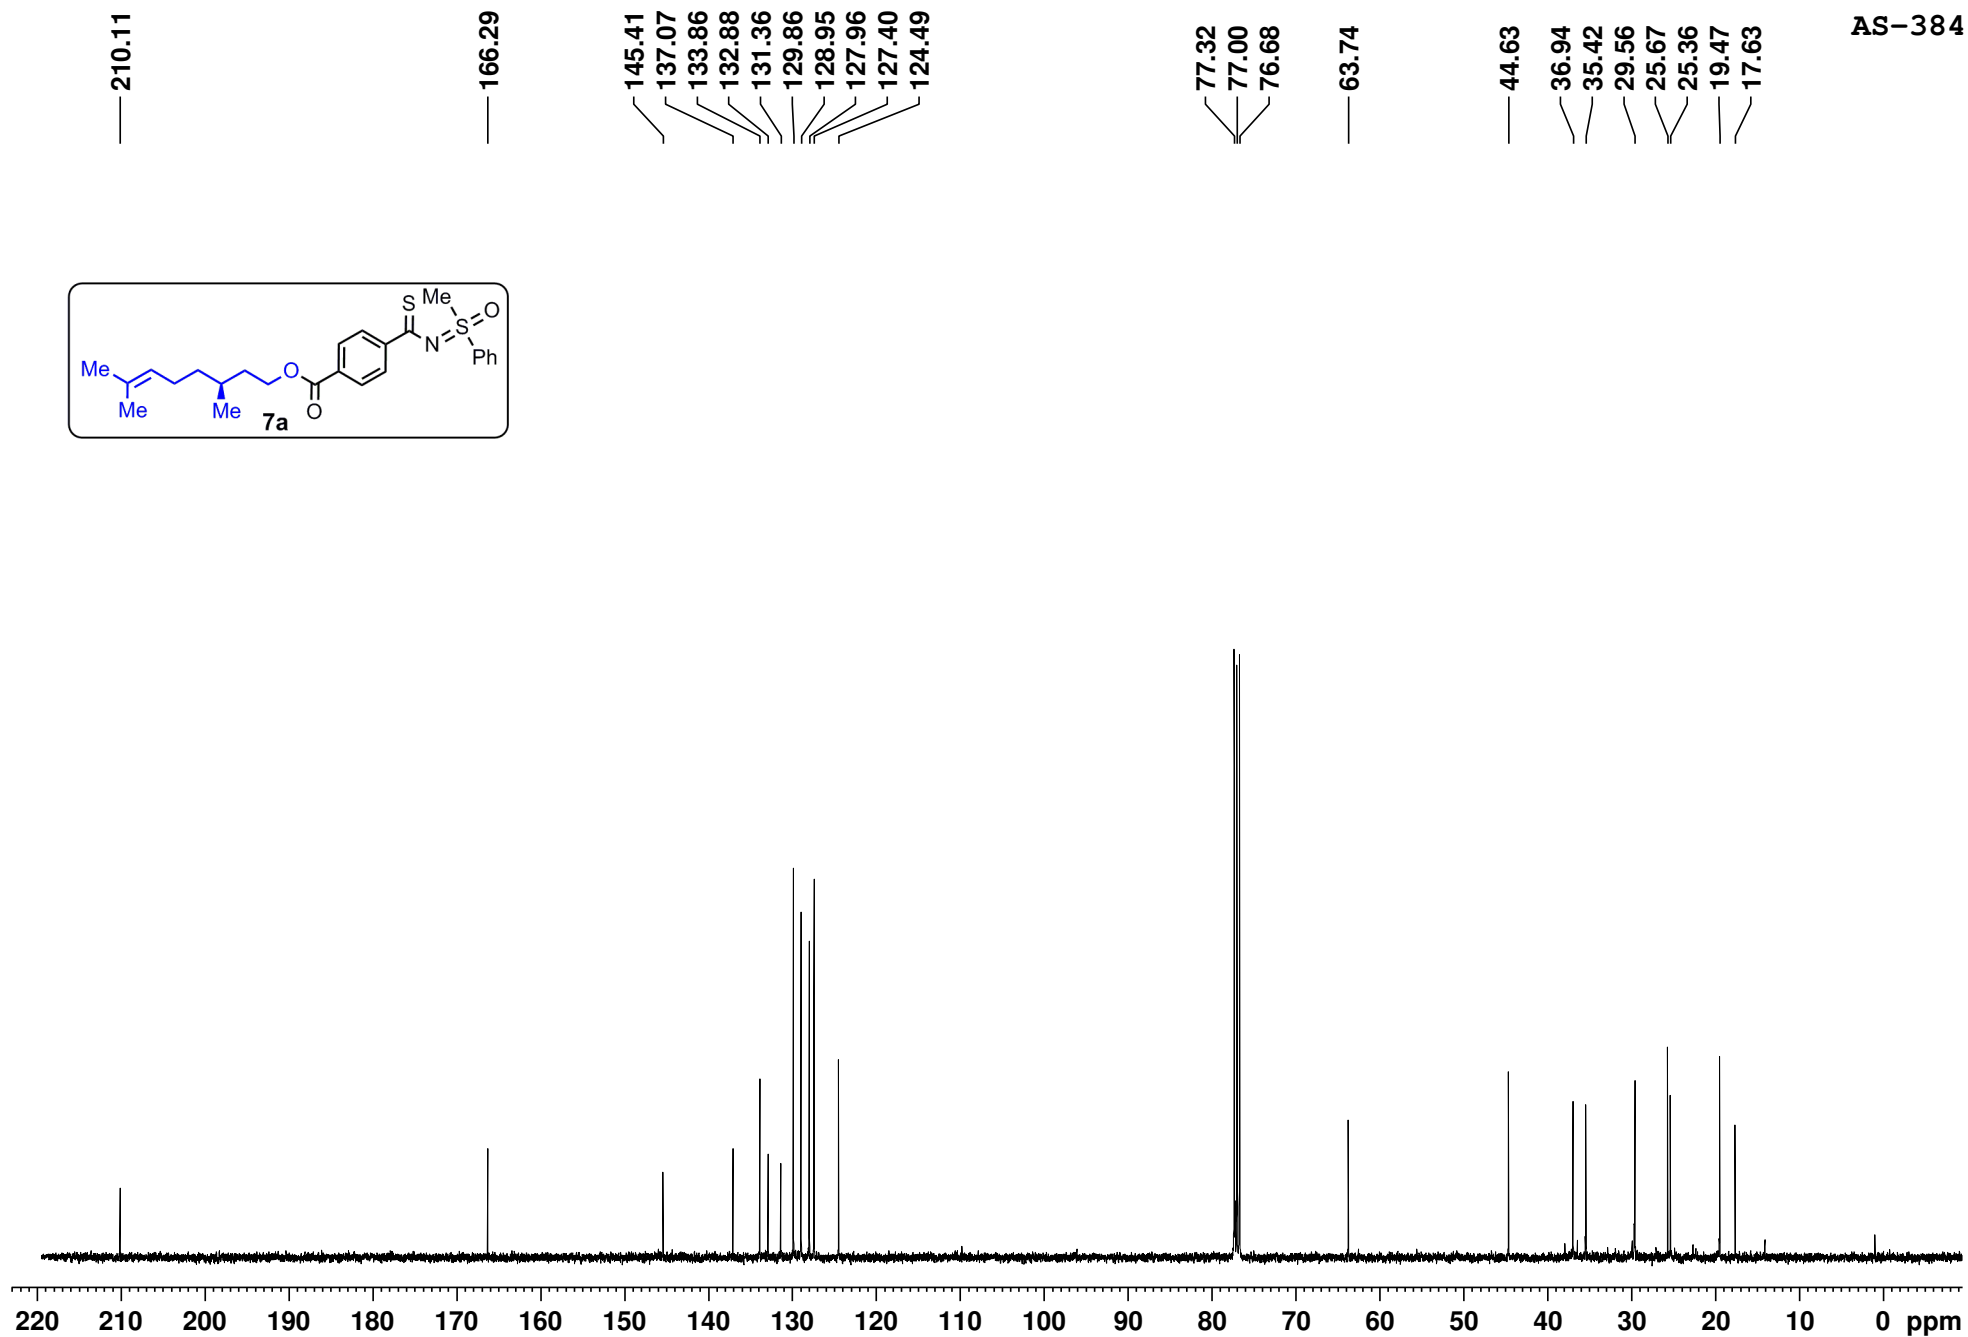

8.364  
8.347  
8.023  
8.008  
7.984  
7.969  
7.693  
7.678  
7.664  
7.623  
7.607  
7.593  
7.260

5.488  
5.474  
5.460  
5.106  
5.093  
5.079  
4.859  
4.845

3.501

2.150  
2.134  
2.120  
2.108  
2.092  
2.078  
2.065  
1.769  
1.673  
1.602

MJ-17-207

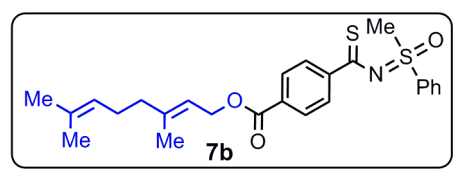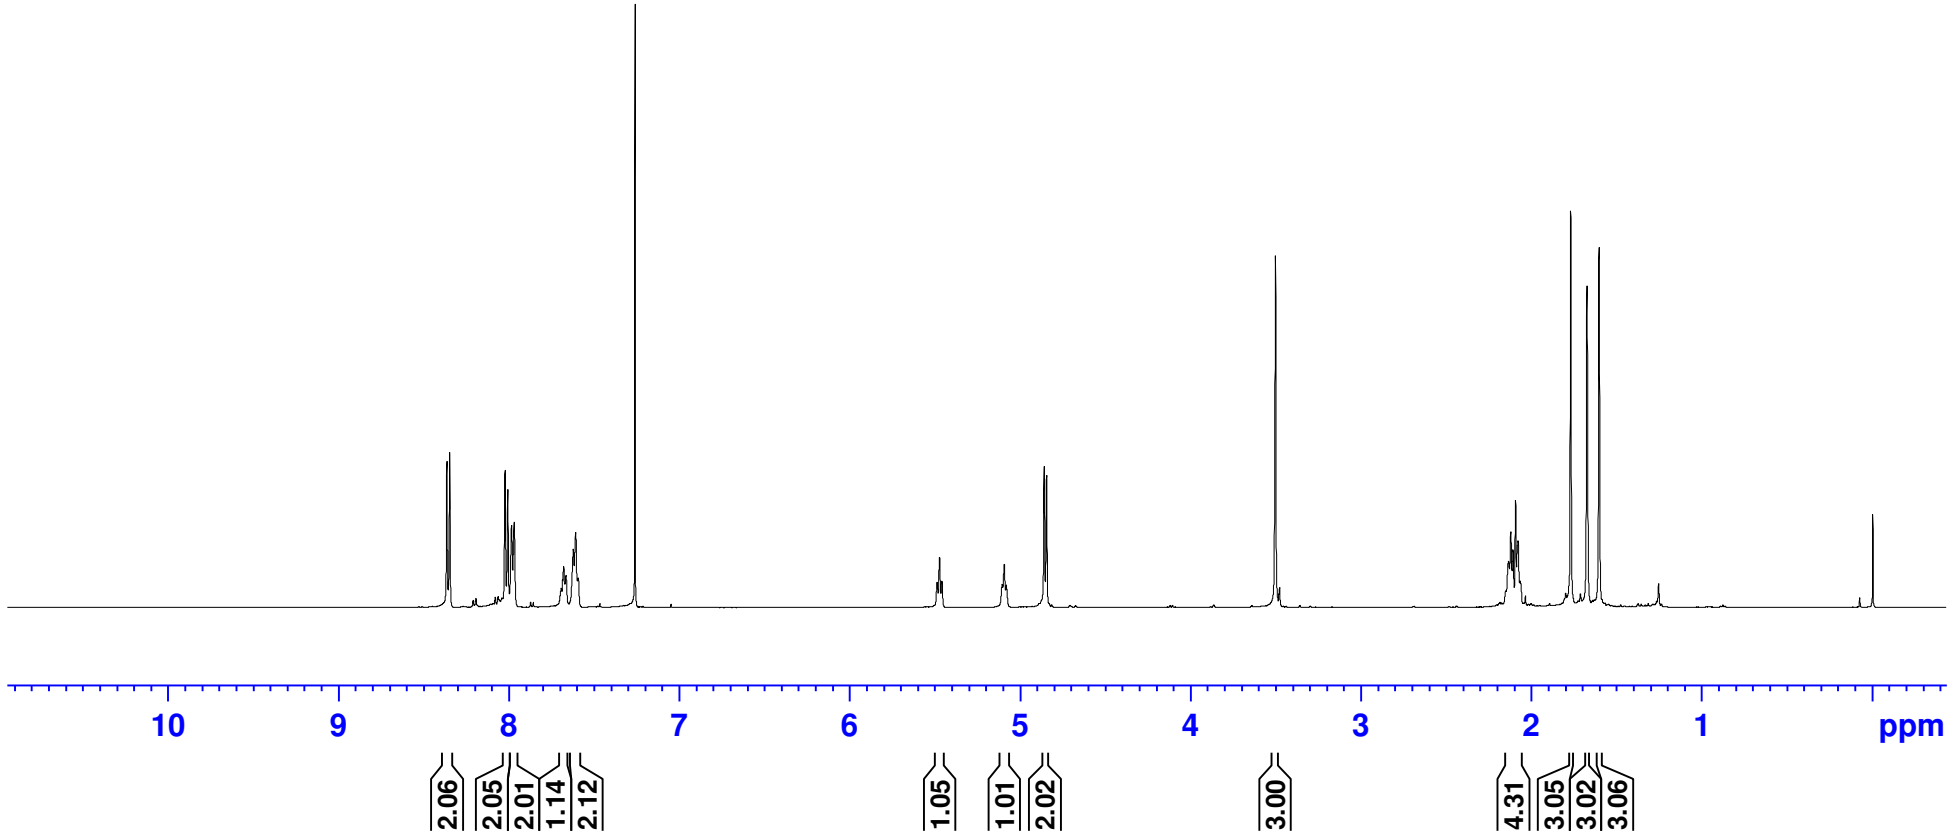



MJ-17-207

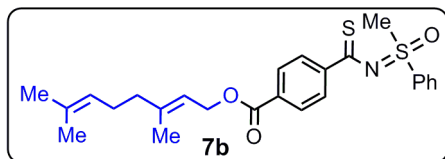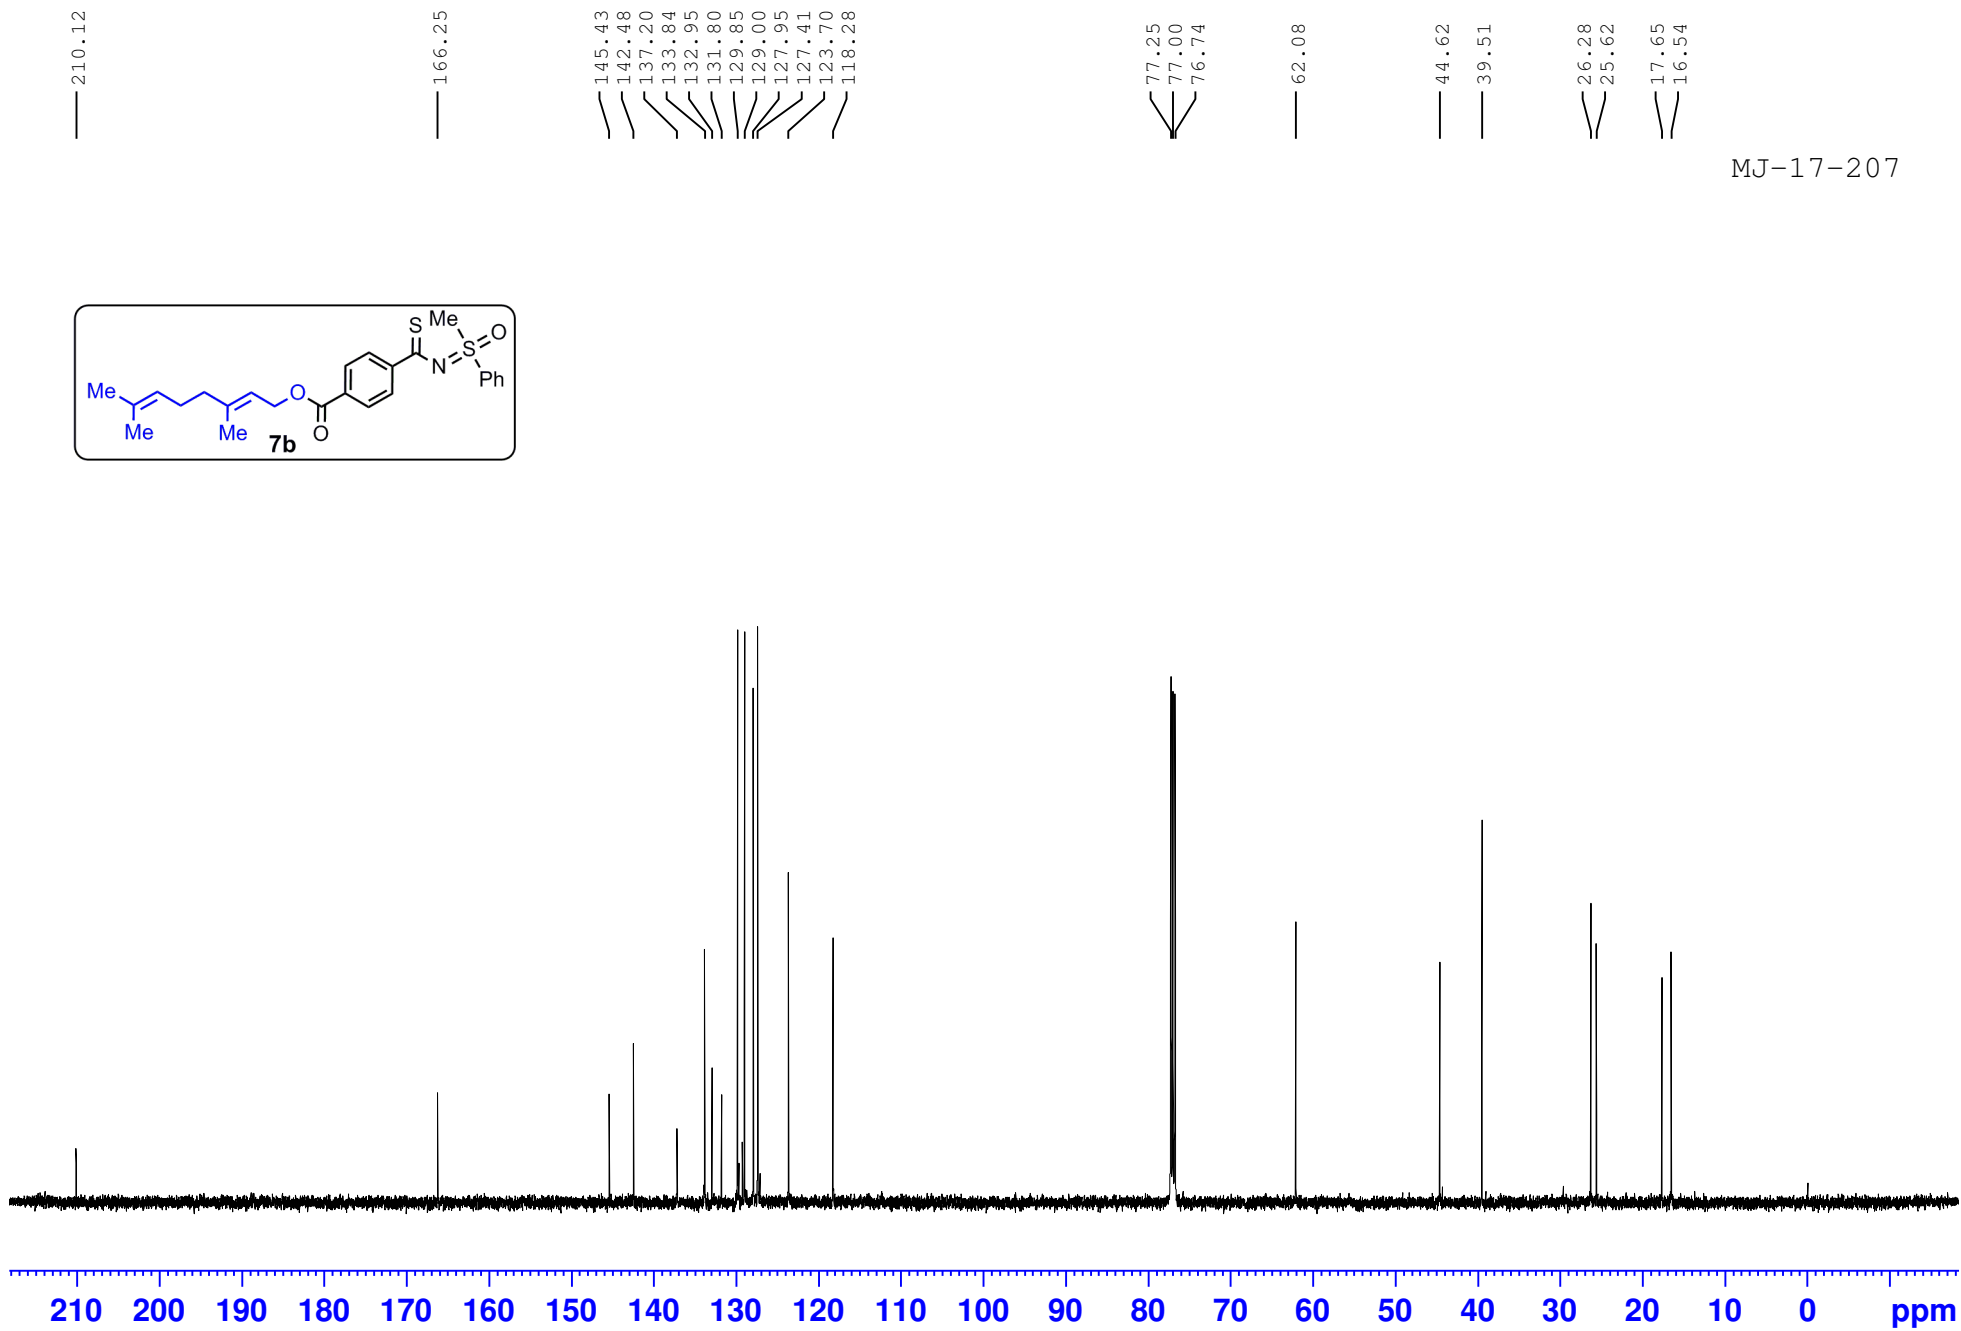

8.370  
8.353  
8.021  
8.004  
7.989  
7.974  
7.703  
7.688  
7.673  
7.631  
7.615  
7.600  
7.260

4.962  
4.953  
4.940  
4.931  
4.918  
4.910

3.507  
2.144  
2.121  
1.957  
1.952  
1.943  
1.938  
1.929  
1.924  
1.743  
1.721  
1.587  
1.566  
1.542  
1.171  
1.153  
1.129  
1.107  
1.083  
0.939  
0.926  
0.920  
0.906

Arjit-AS-379

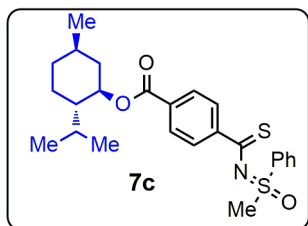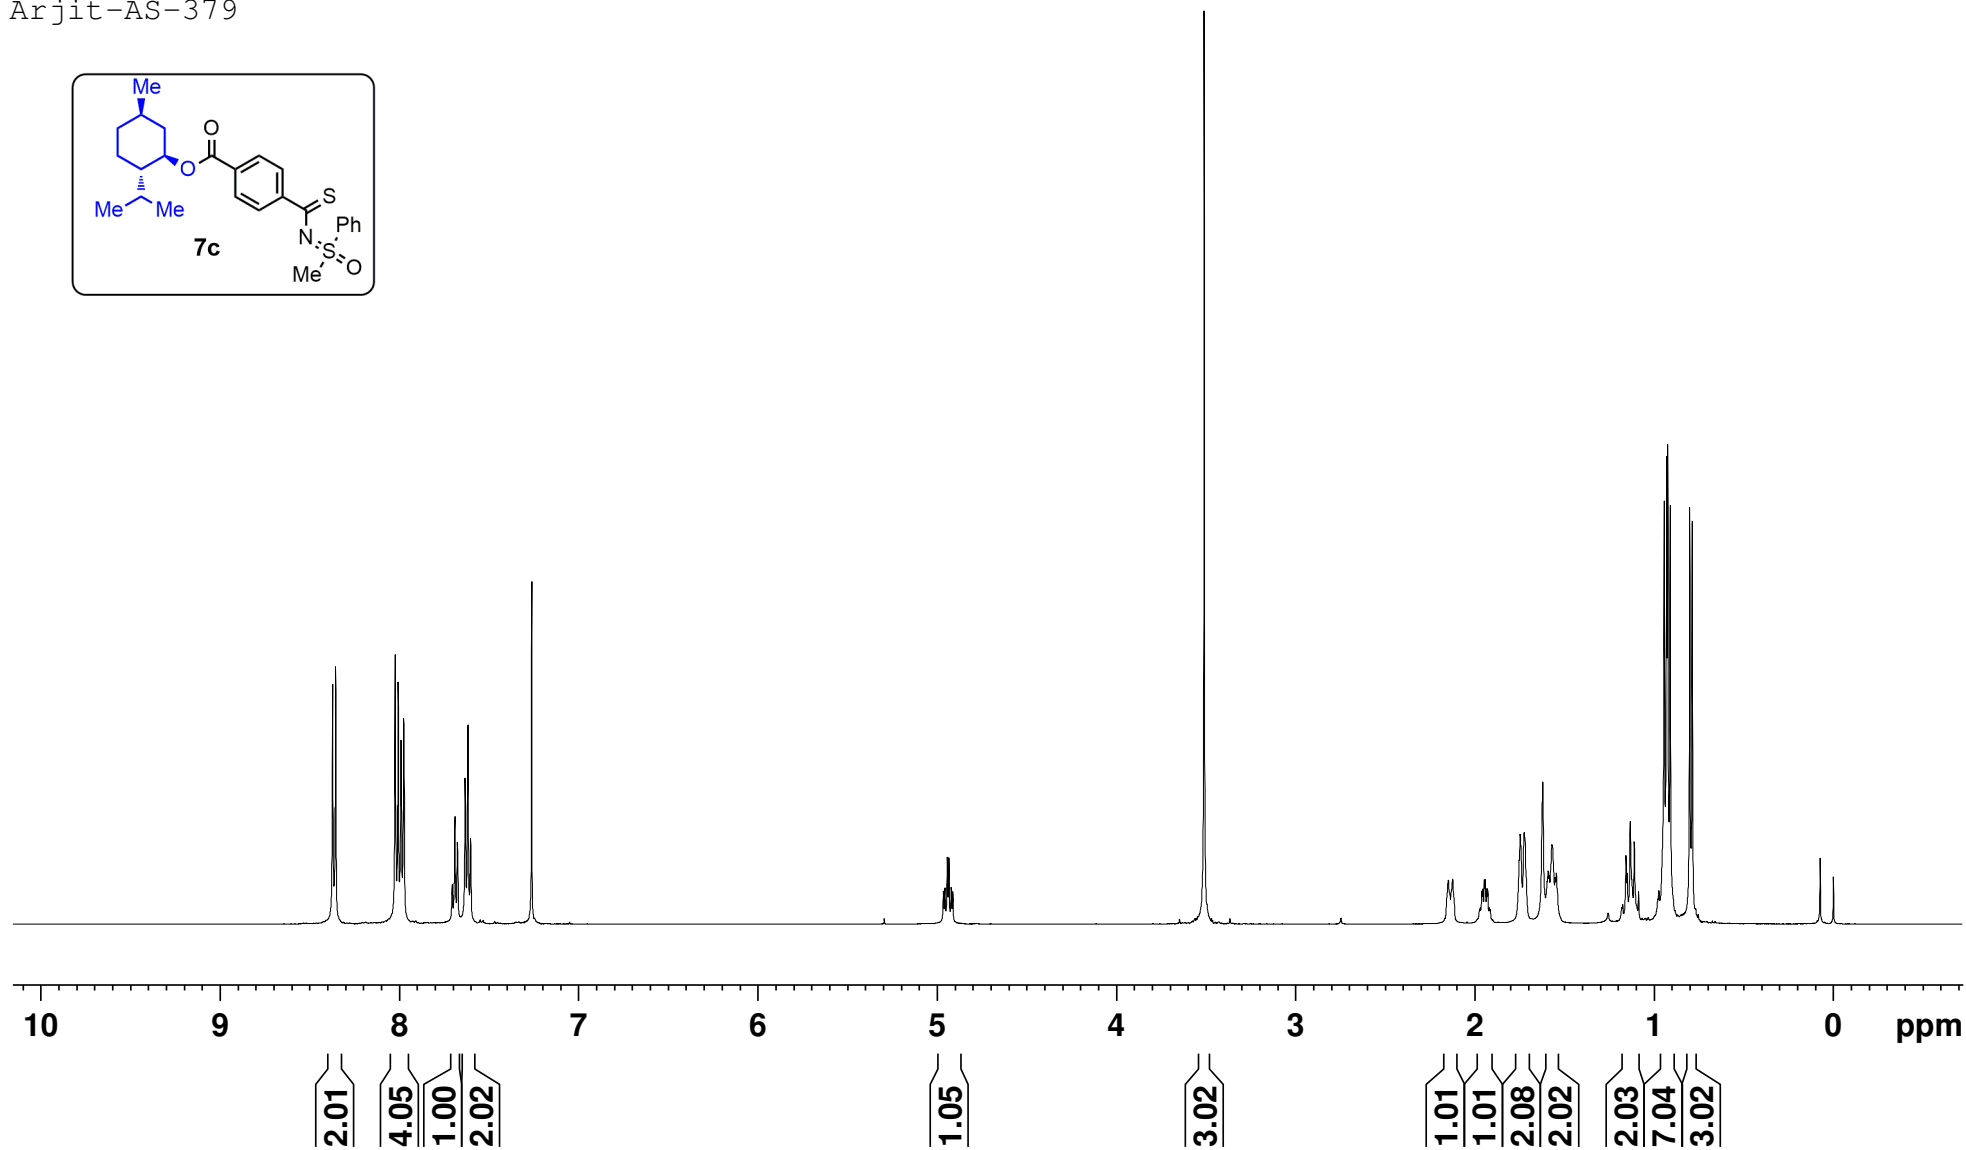

— 210.21

— 165.73

145.43  
137.23  
133.86  
133.28  
129.86  
128.98  
127.96  
127.43

77.25  
77.00  
76.75  
75.17

47.26  
44.63  
40.92  
34.30  
31.45  
26.59  
23.74  
22.00  
20.69  
16.60

AS-379

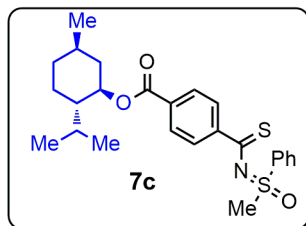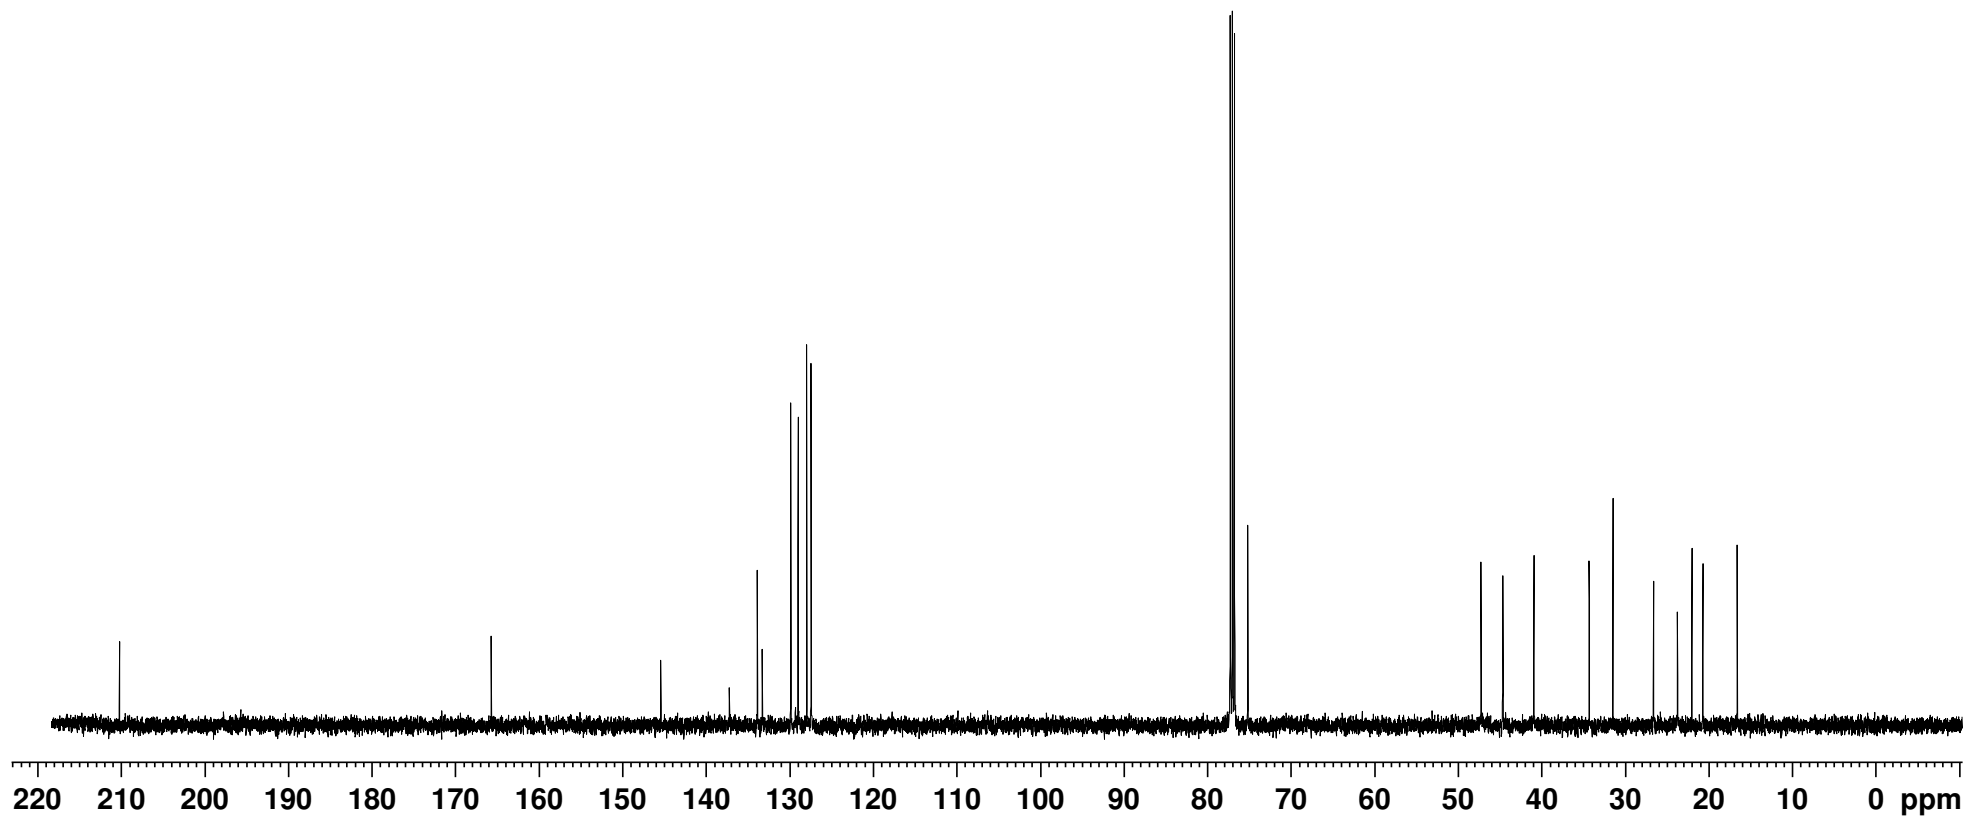

8.379  
8.358  
8.026  
8.005  
7.965  
7.946  
7.673  
7.655  
7.637  
7.601  
7.581  
7.563  
7.260  
5.123  
5.101  
3.486  
2.496  
2.485  
2.470  
2.462  
2.450  
2.446  
2.437  
2.412  
2.147  
2.136  
2.123  
2.114  
2.104  
2.091  
2.081  
1.831  
1.822  
1.801  
1.793  
1.783  
1.772  
1.764  
1.741  
1.730  
1.436  
1.431  
1.400  
1.369  
1.332  
1.321  
1.307  
1.302  
1.278  
1.269  
1.245  
1.138  
1.131  
1.104  
1.096  
0.954  
0.903

SRS-8-24

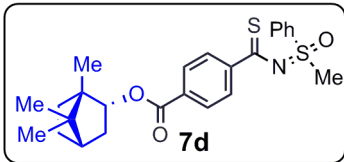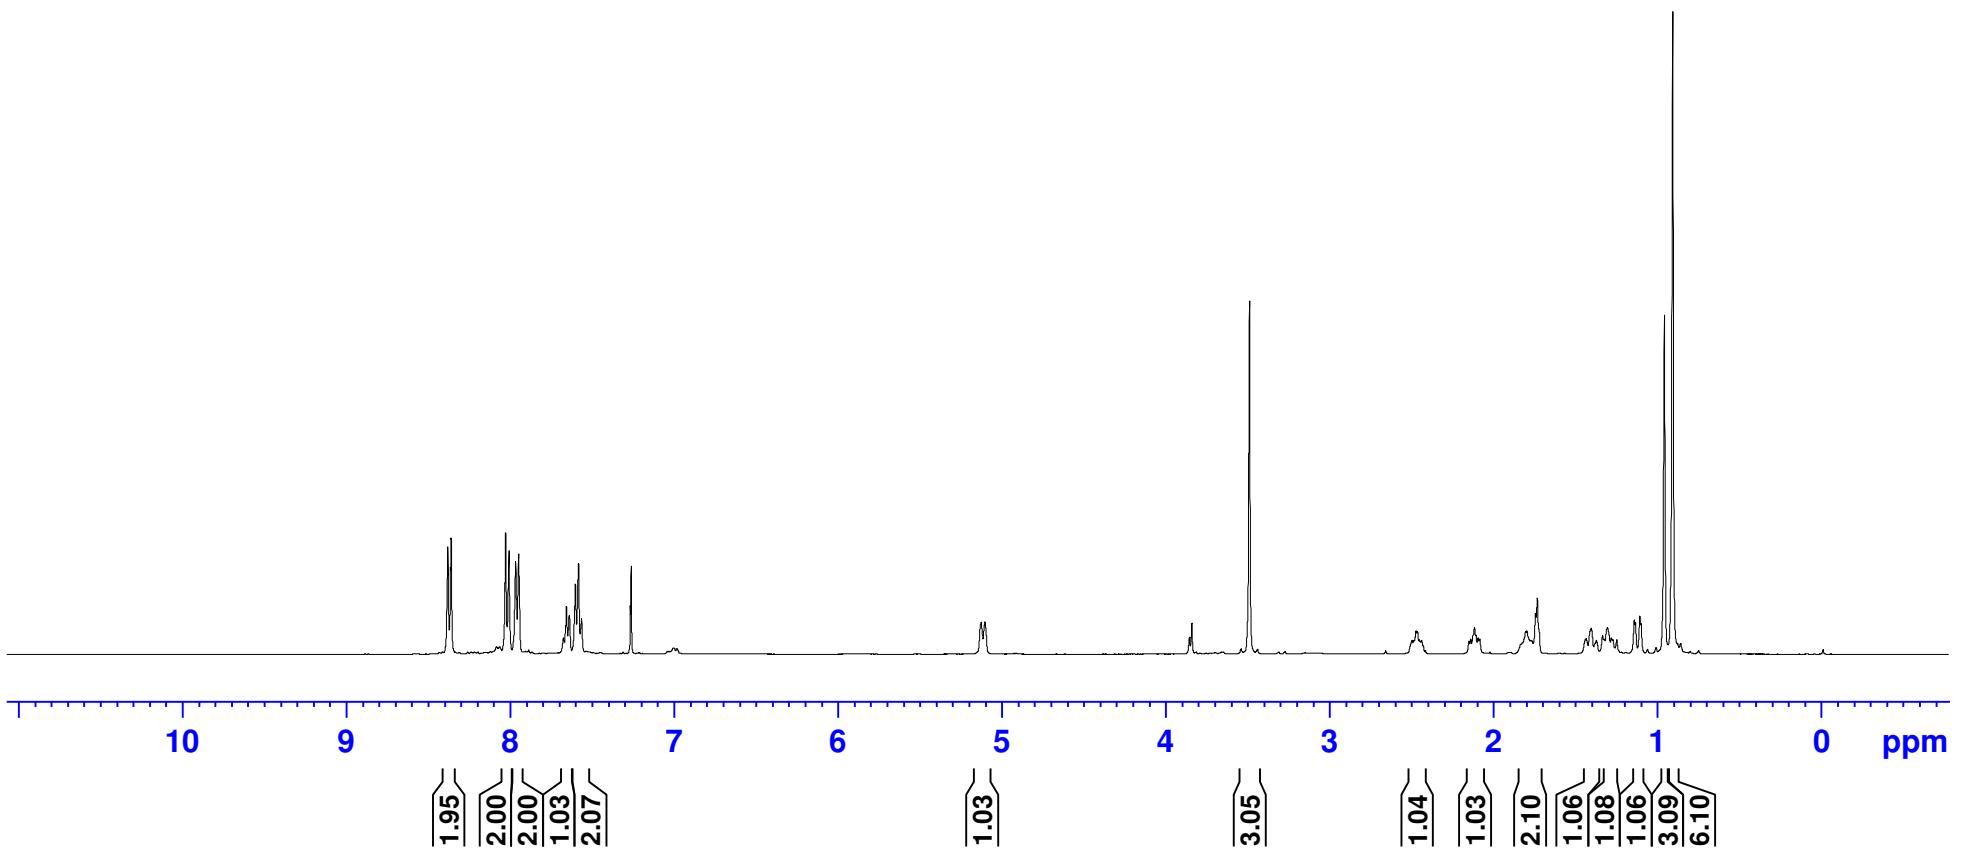

SRS-8-24

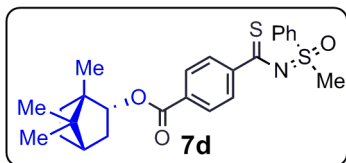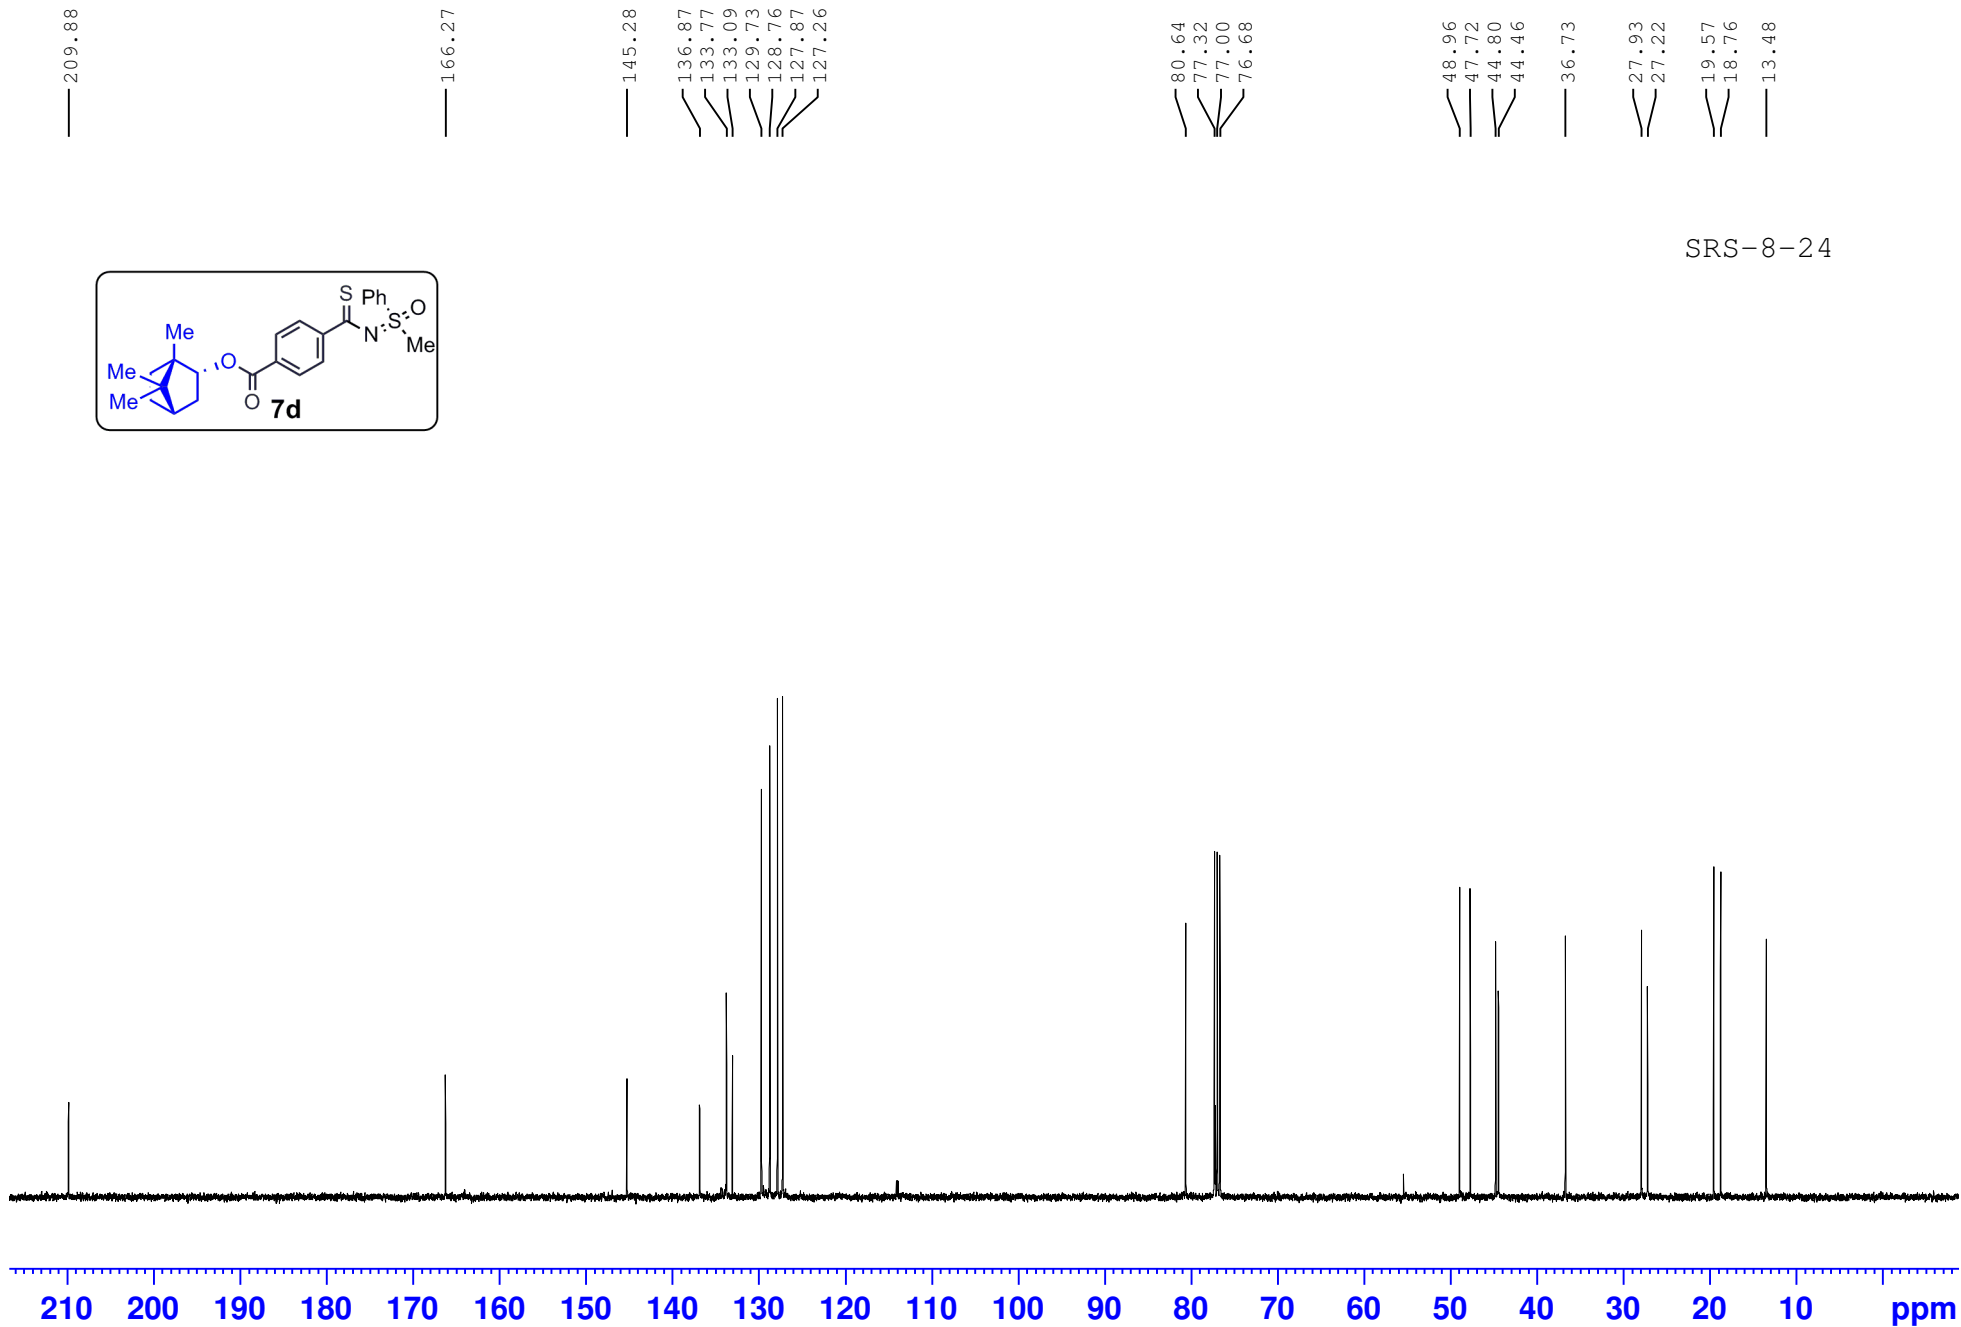

8.375  
8.358  
8.022  
8.005  
7.996  
7.981  
7.705  
7.690  
7.675  
7.635  
7.619  
7.604  
7.260

5.360  
5.349  
5.338

4.340  
4.326  
4.313

3.510  
2.019  
1.803  
1.790  
1.775  
1.760  
1.747  
1.456  
1.441  
1.426  
1.412  
1.355  
1.318  
1.296  
1.265  
1.259  
0.889  
0.876  
0.861

AS- 496

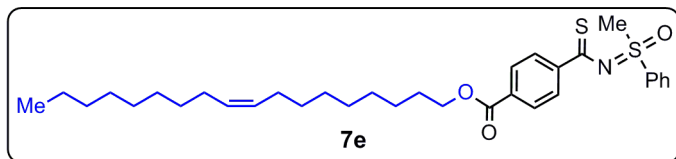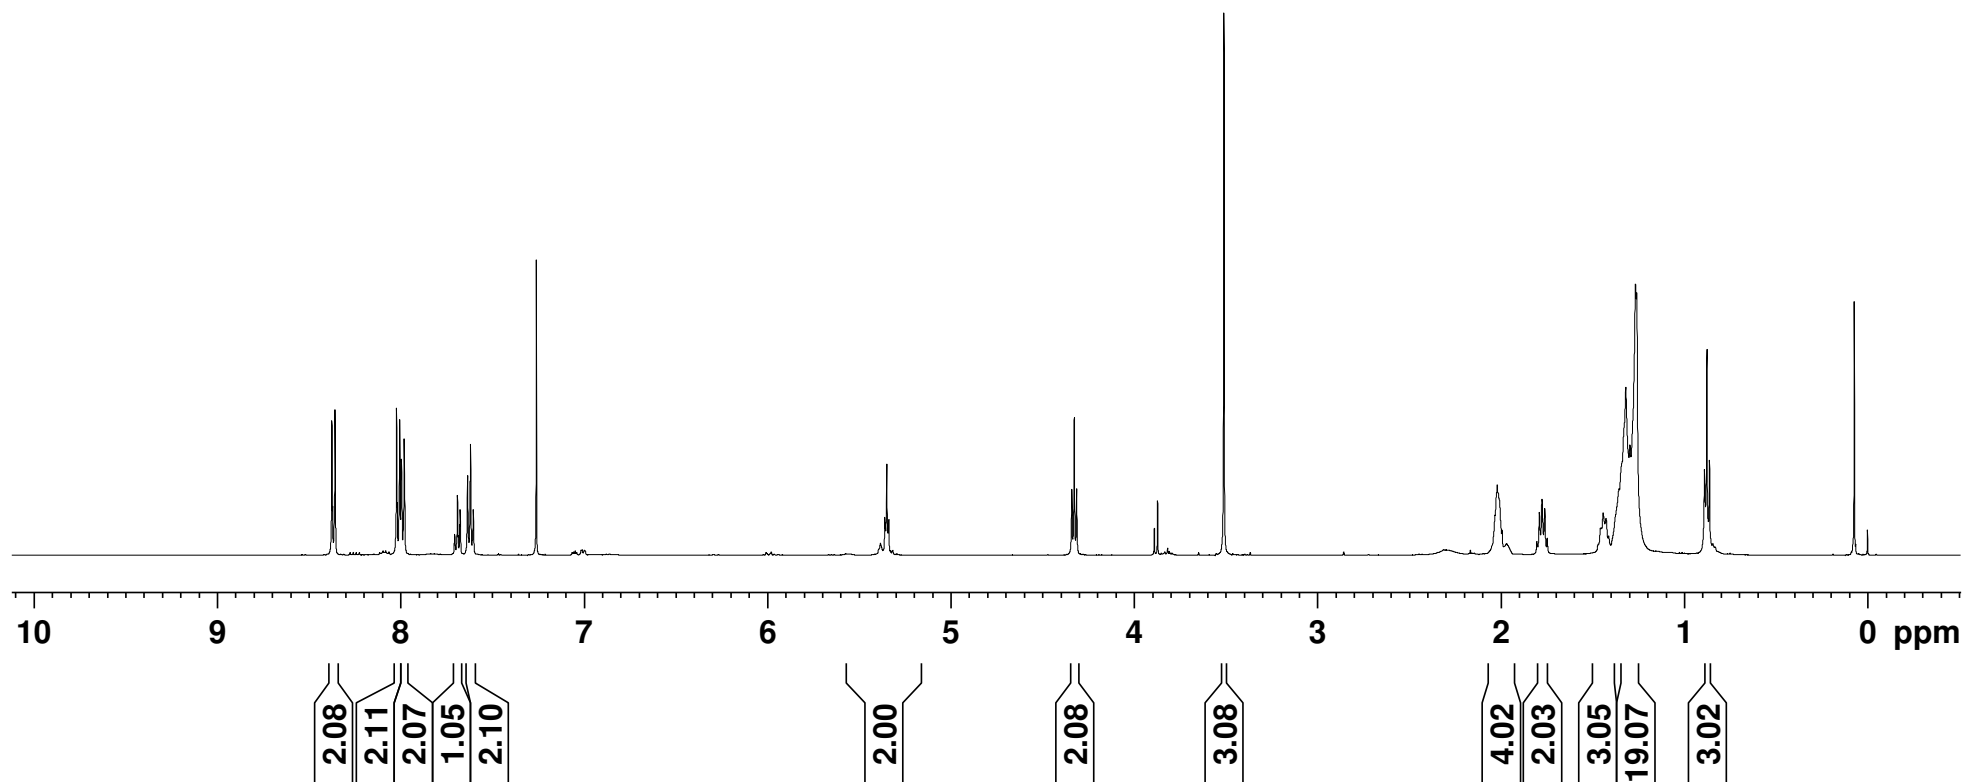

— 209.64

— 165.98

145.23  
136.87  
133.63  
132.66  
129.71  
129.61  
129.52  
128.71  
127.77  
127.17

77.25  
77.00  
76.74  
65.10  
55.35  
44.33  
32.35  
31.64  
29.51  
29.48  
29.26  
29.17  
29.05  
29.01  
28.95  
28.45  
26.97  
26.94  
25.78  
22.42  
13.88

Arjit-AS-496

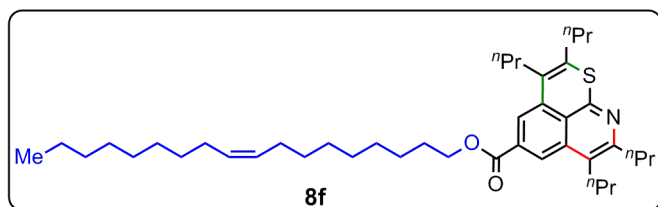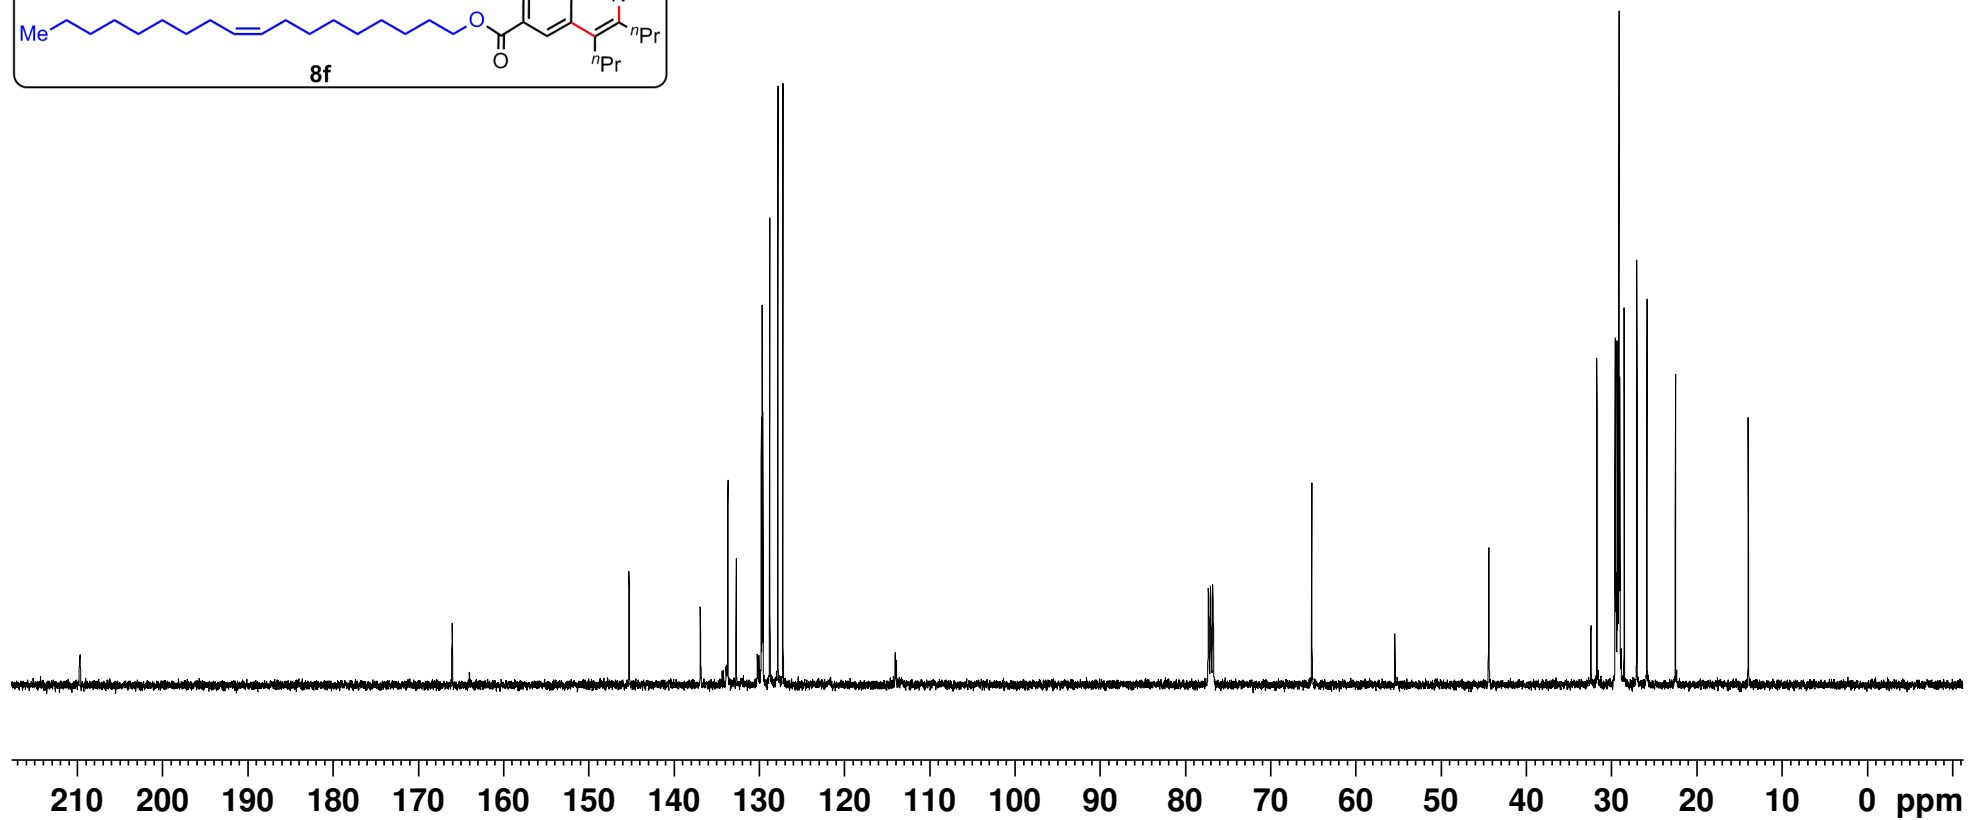

Majji-MJ-17-I35

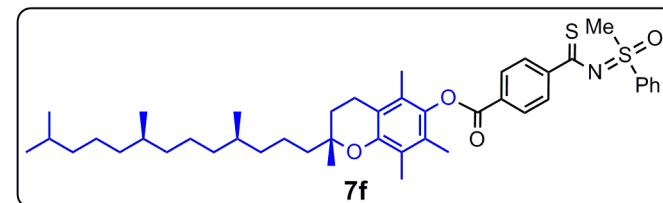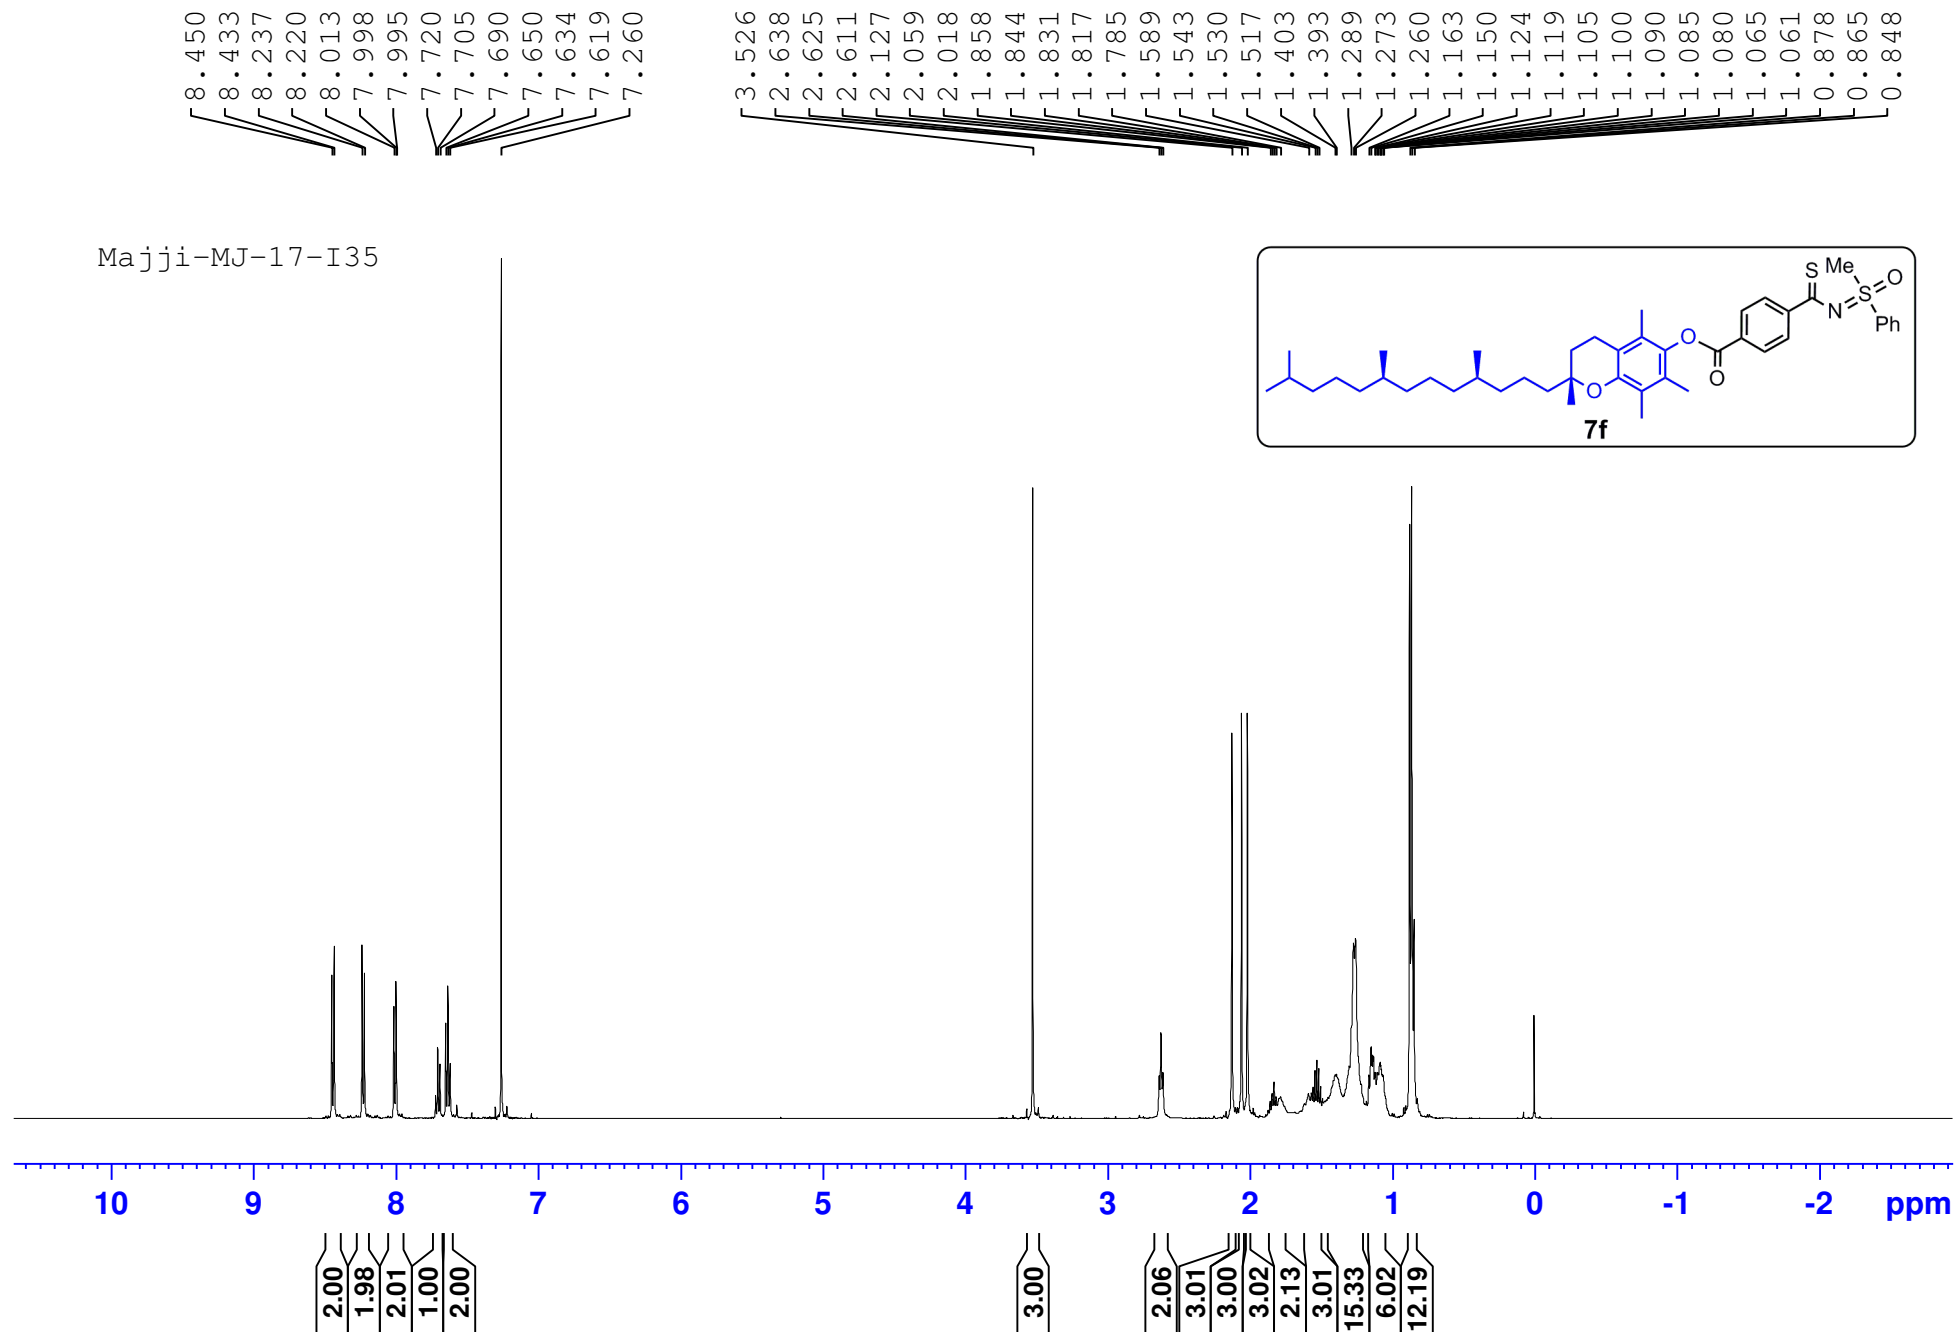



210.10

164.82

149.54  
146.07  
140.65  
137.21  
133.90  
132.02  
129.89  
128.17  
127.47  
126.83  
125.06  
123.16  
117.52

77.25  
77.00  
76.74  
75.11

44.66  
39.38  
37.59  
37.55  
37.50  
37.46  
37.42  
37.39  
37.29  
32.78  
32.71  
27.96  
24.80  
24.79  
24.44  
22.69  
22.60  
21.04  
20.63  
19.74  
19.68  
19.65  
19.63  
19.59  
13.01  
12.17

Majji-MJ-17-I35

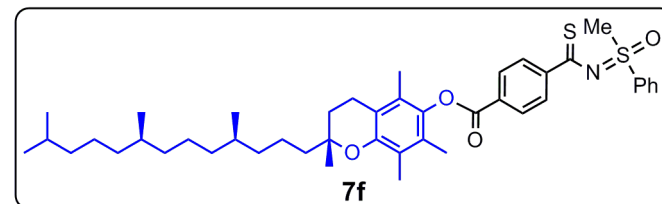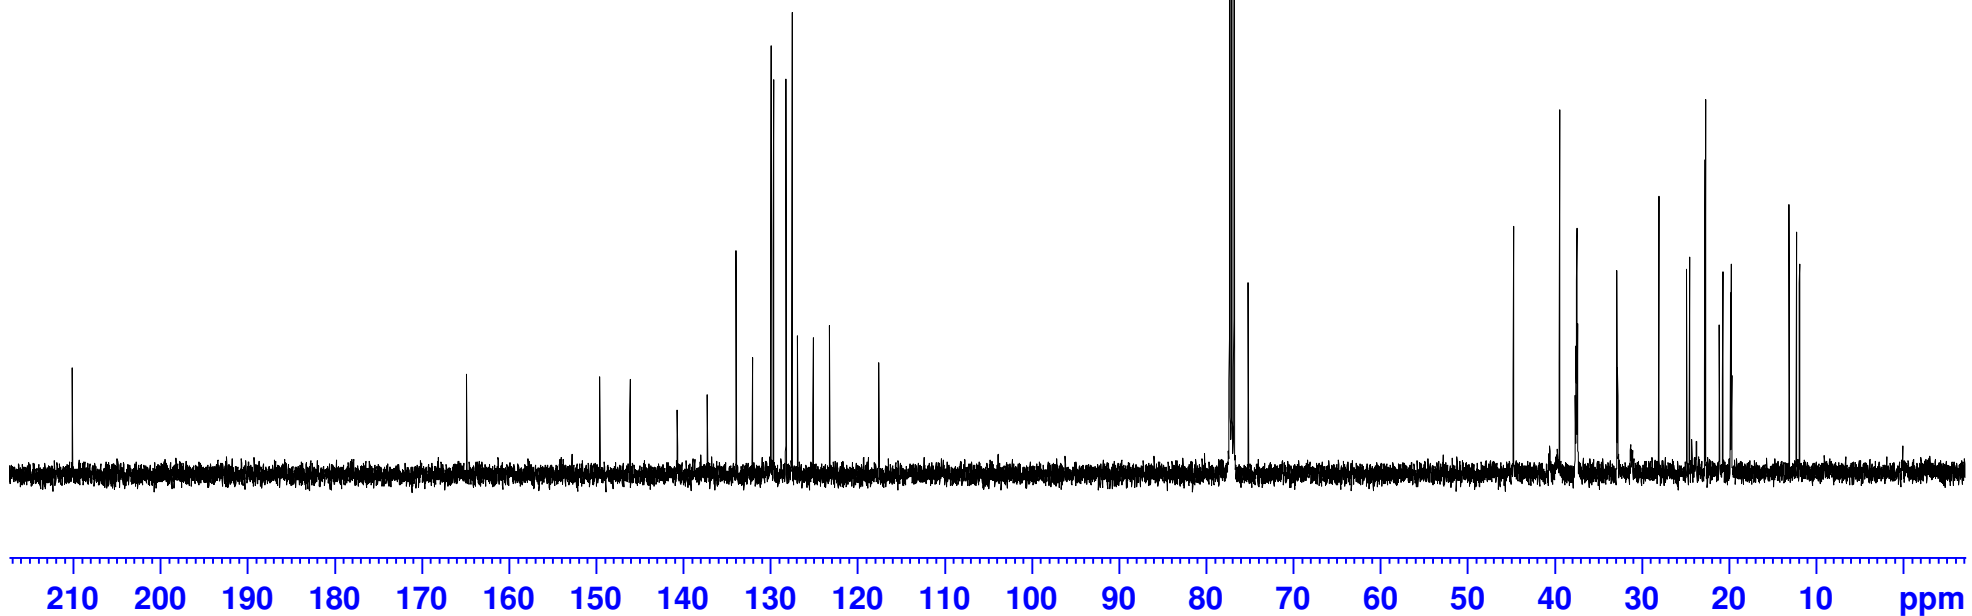

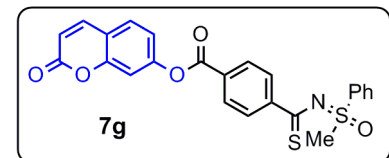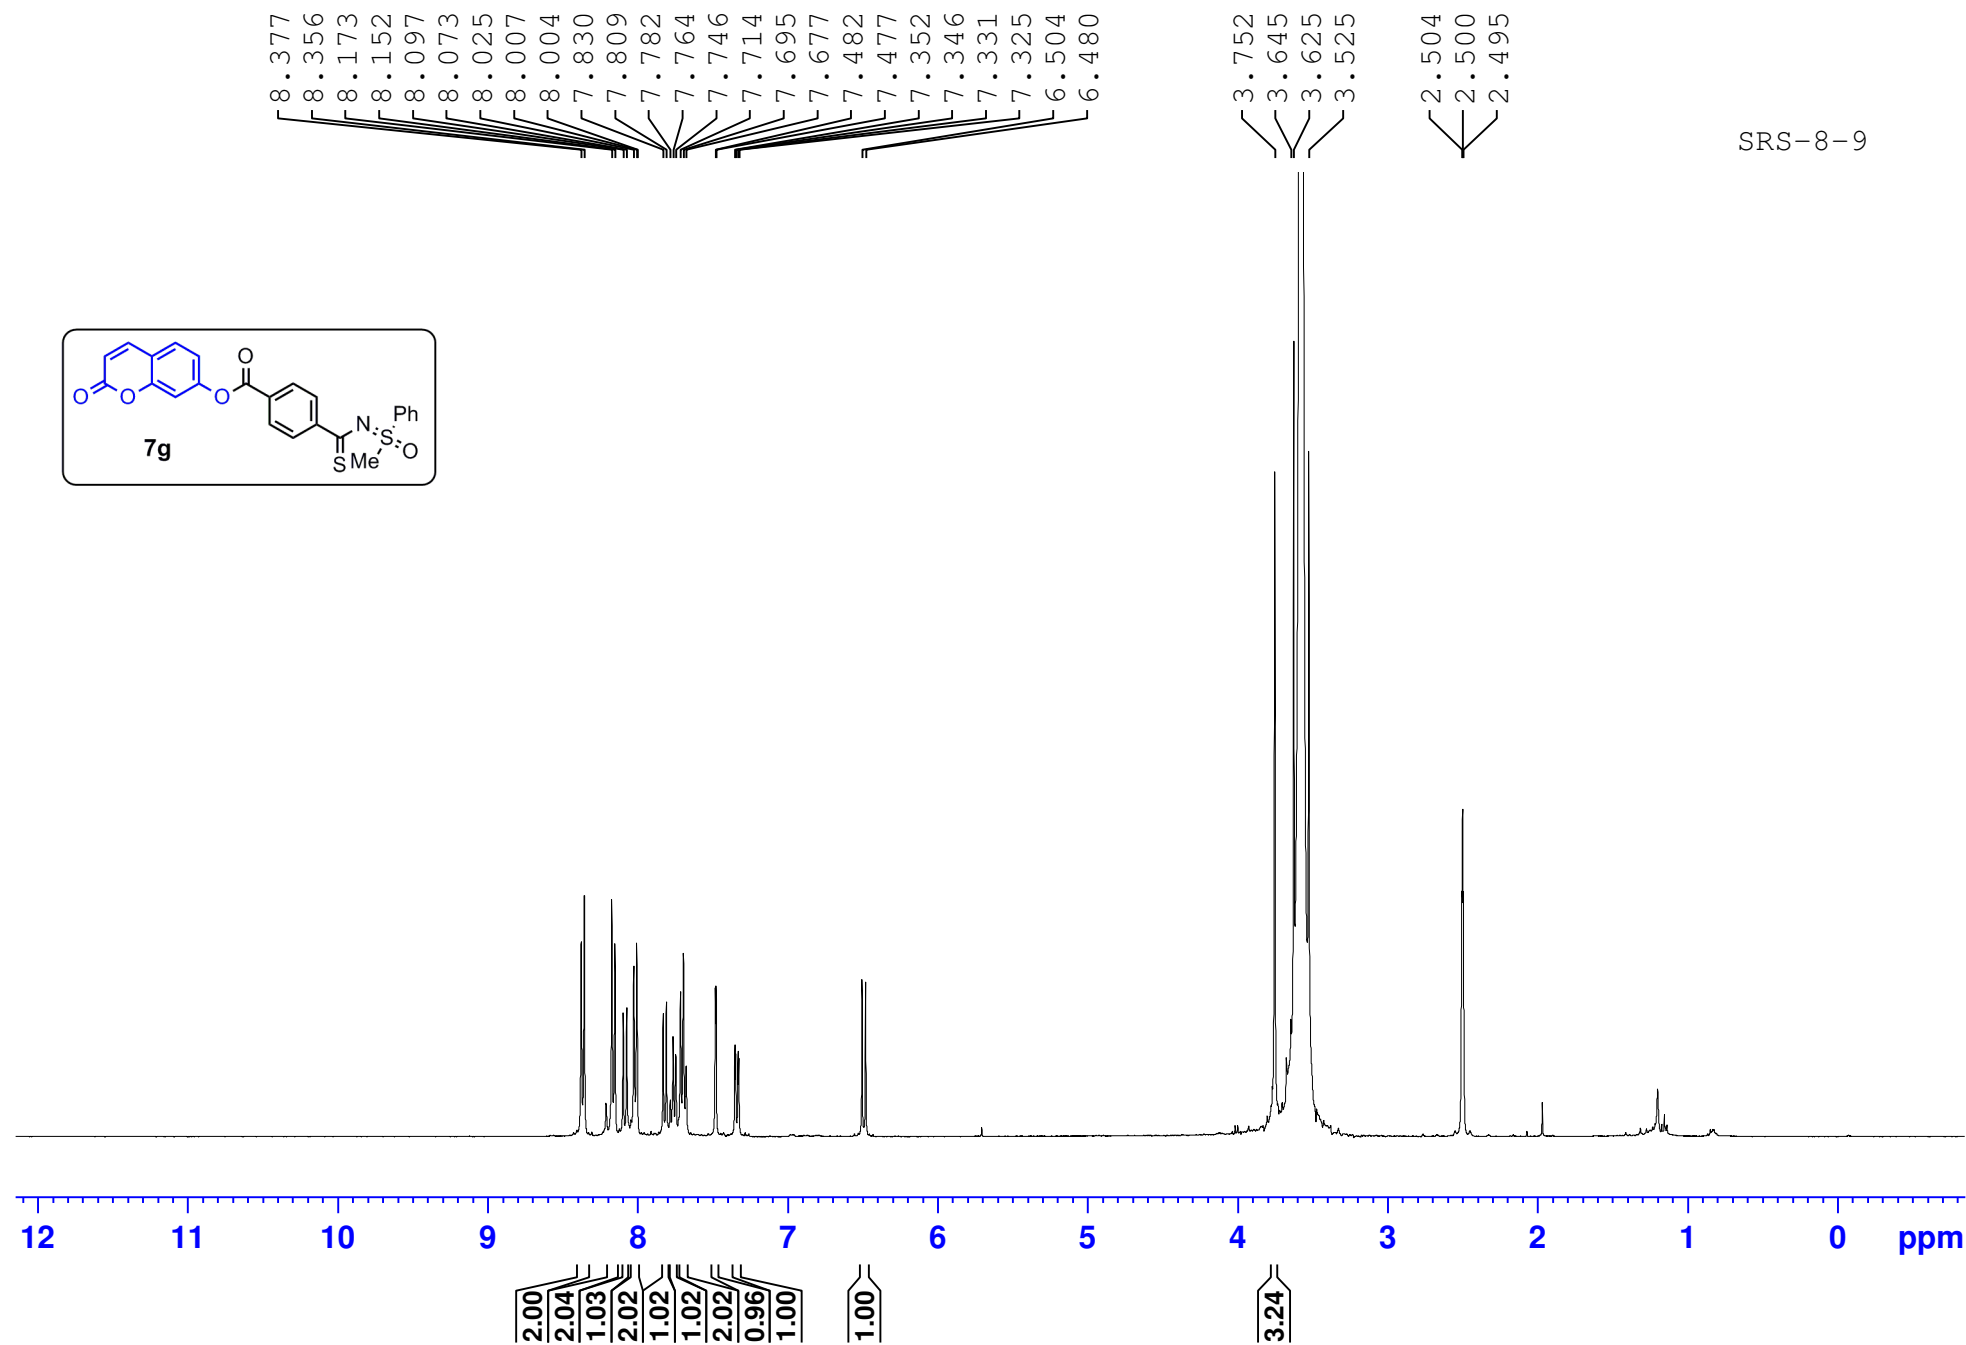

SRS-8-9

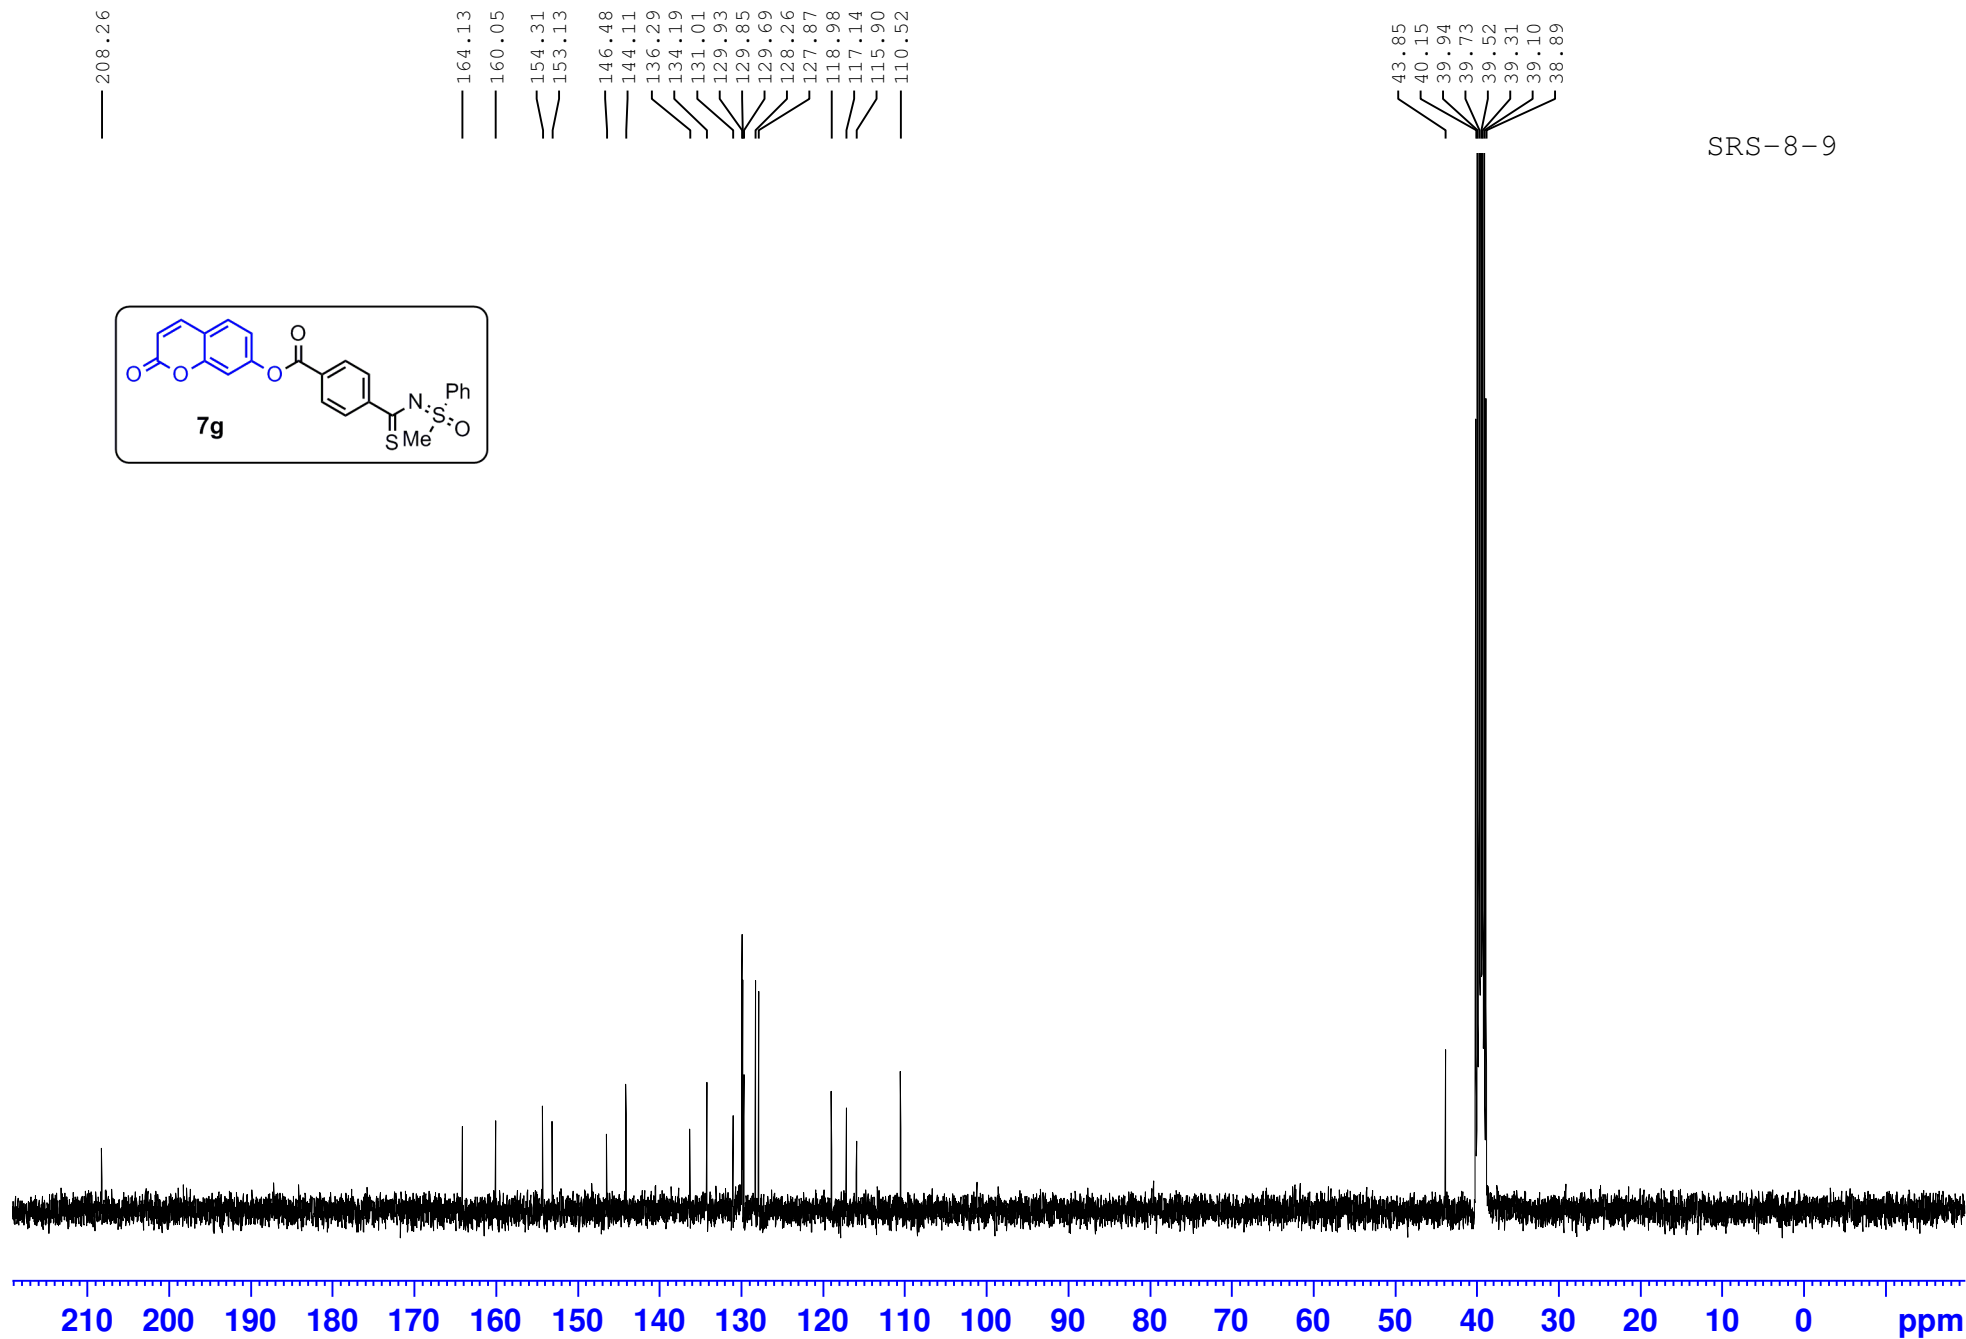

8.369  
8.351  
8.018  
7.981  
7.693  
7.637  
7.622  
7.606  
7.260  
5.429  
4.877  
4.861  
3.511  
2.483  
2.468  
2.038  
2.031  
2.013  
1.990  
1.979  
1.937  
1.910  
1.840  
1.833  
1.765  
1.741  
1.546  
1.534  
1.520  
1.507  
1.494  
1.470  
1.460  
1.353  
1.334  
1.275  
1.255  
1.213  
1.133  
1.116  
1.042  
1.030  
1.023  
1.010  
0.999  
0.929  
0.916  
0.876  
0.871  
0.863  
0.691

AS-411

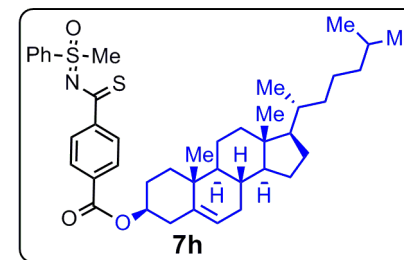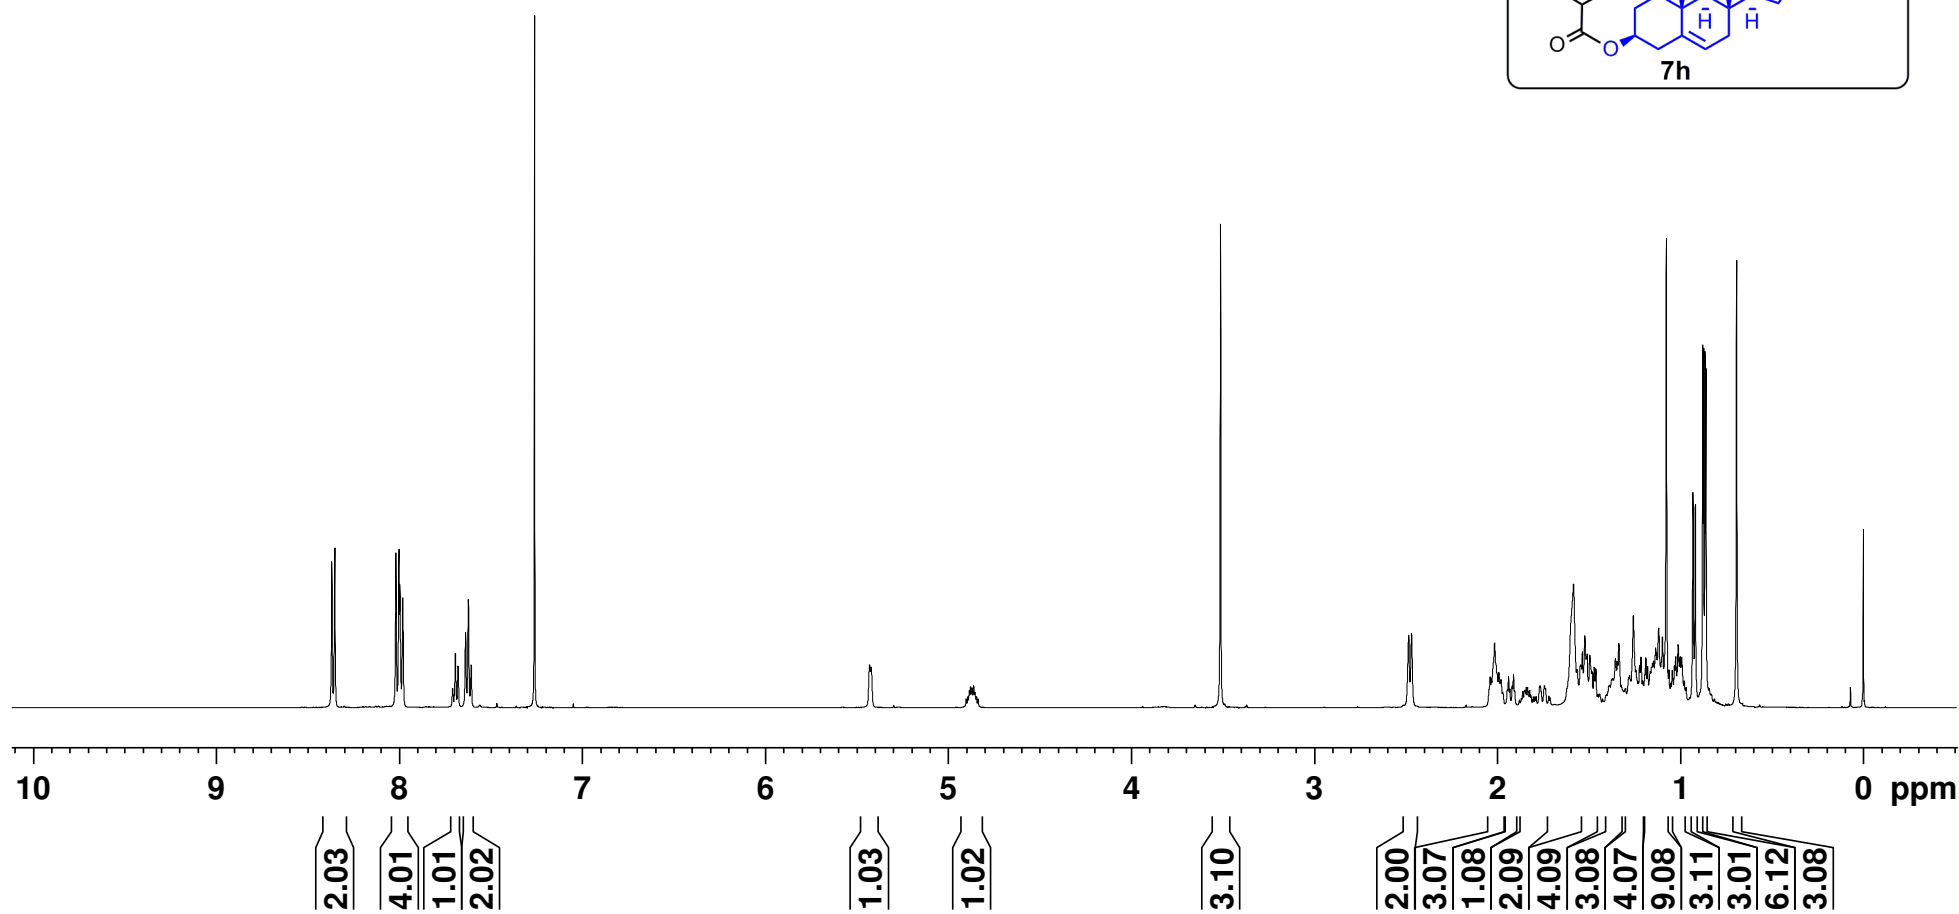

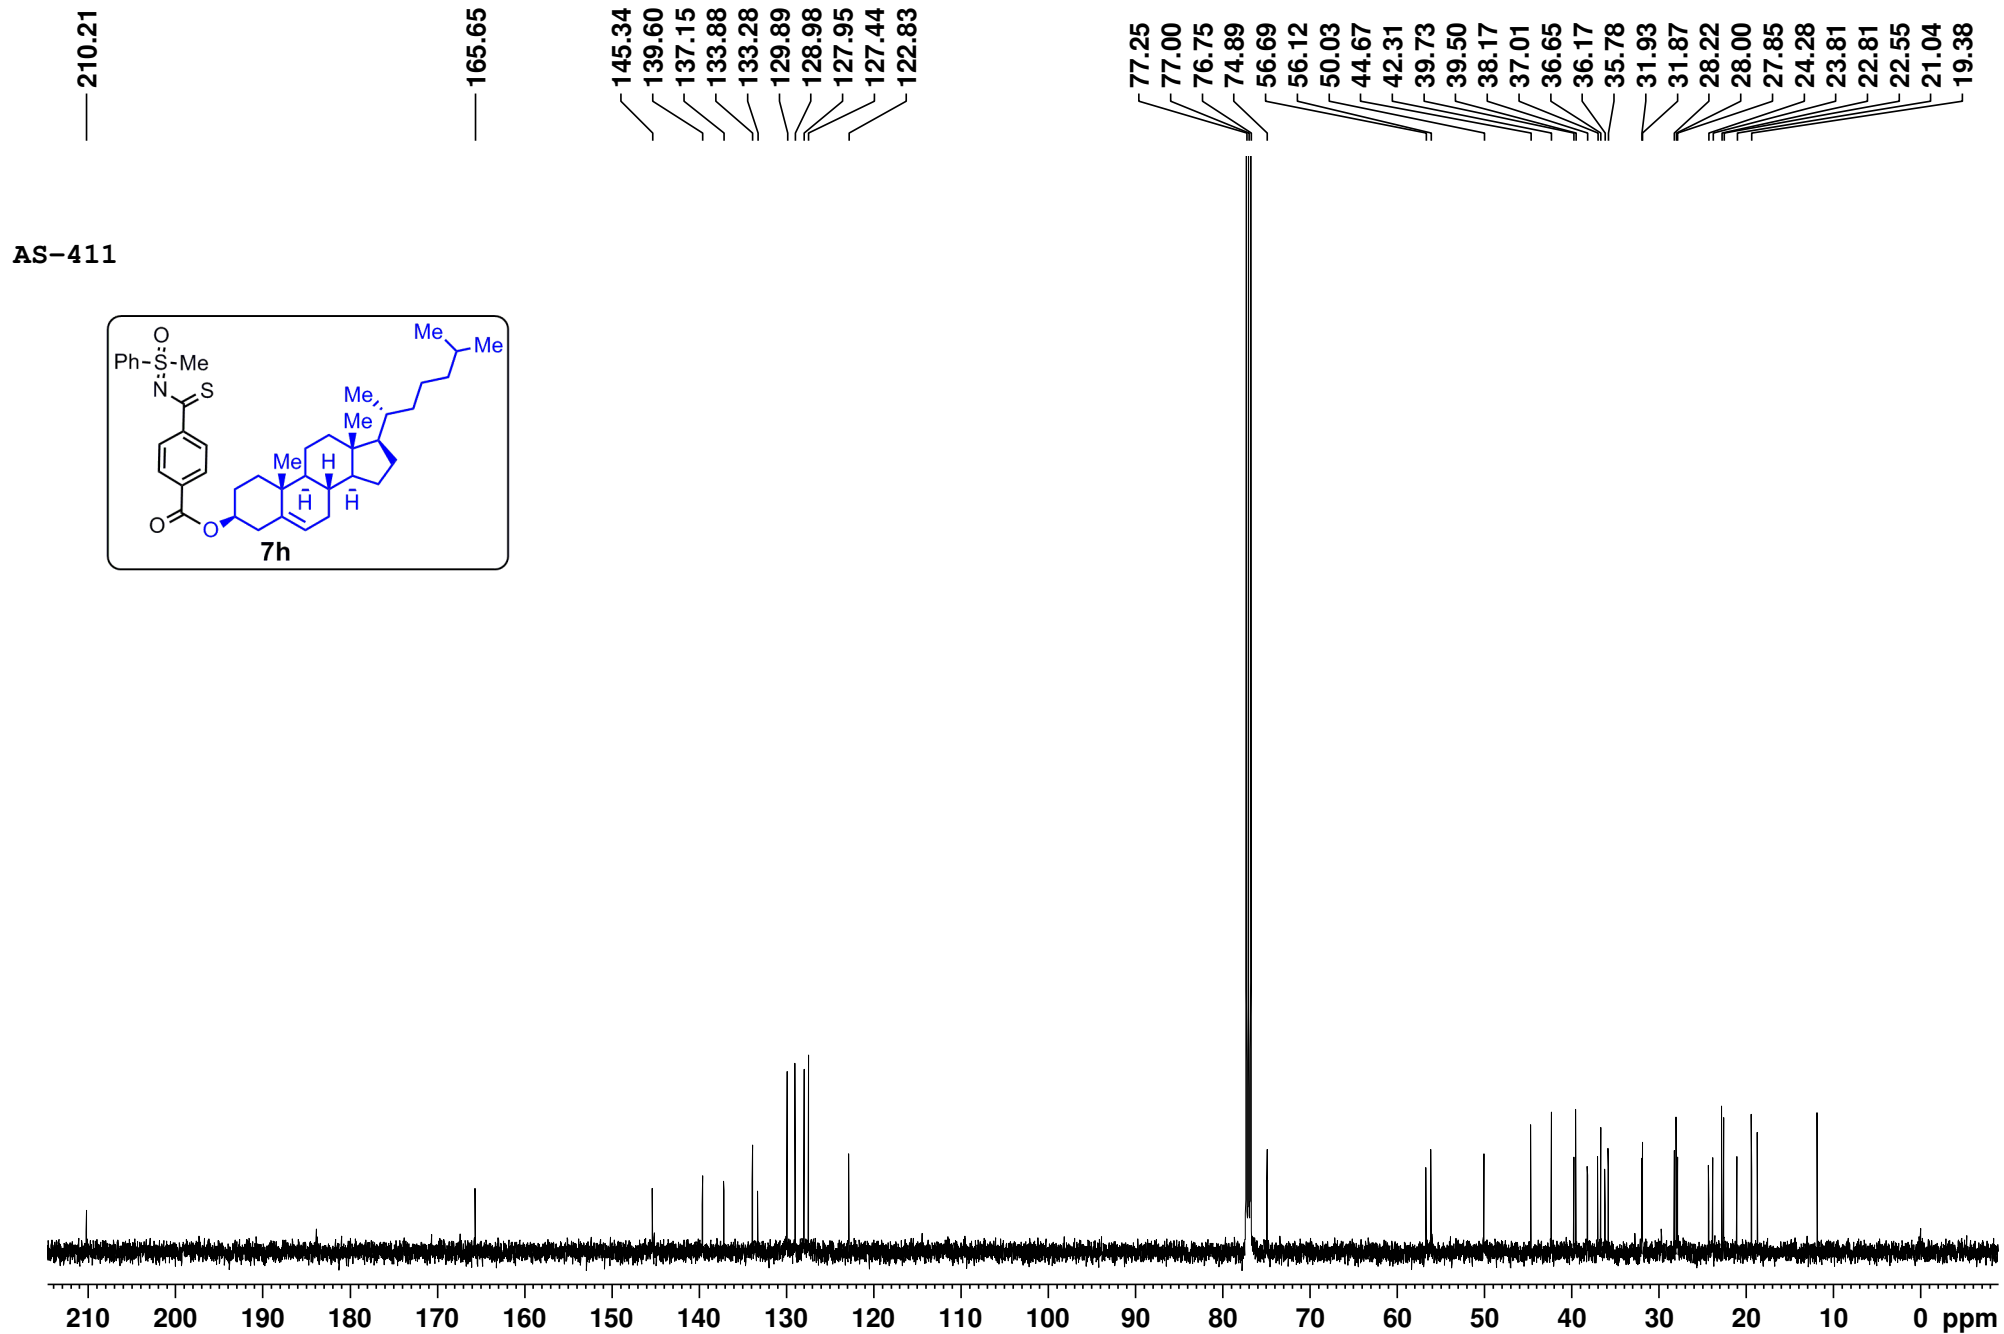

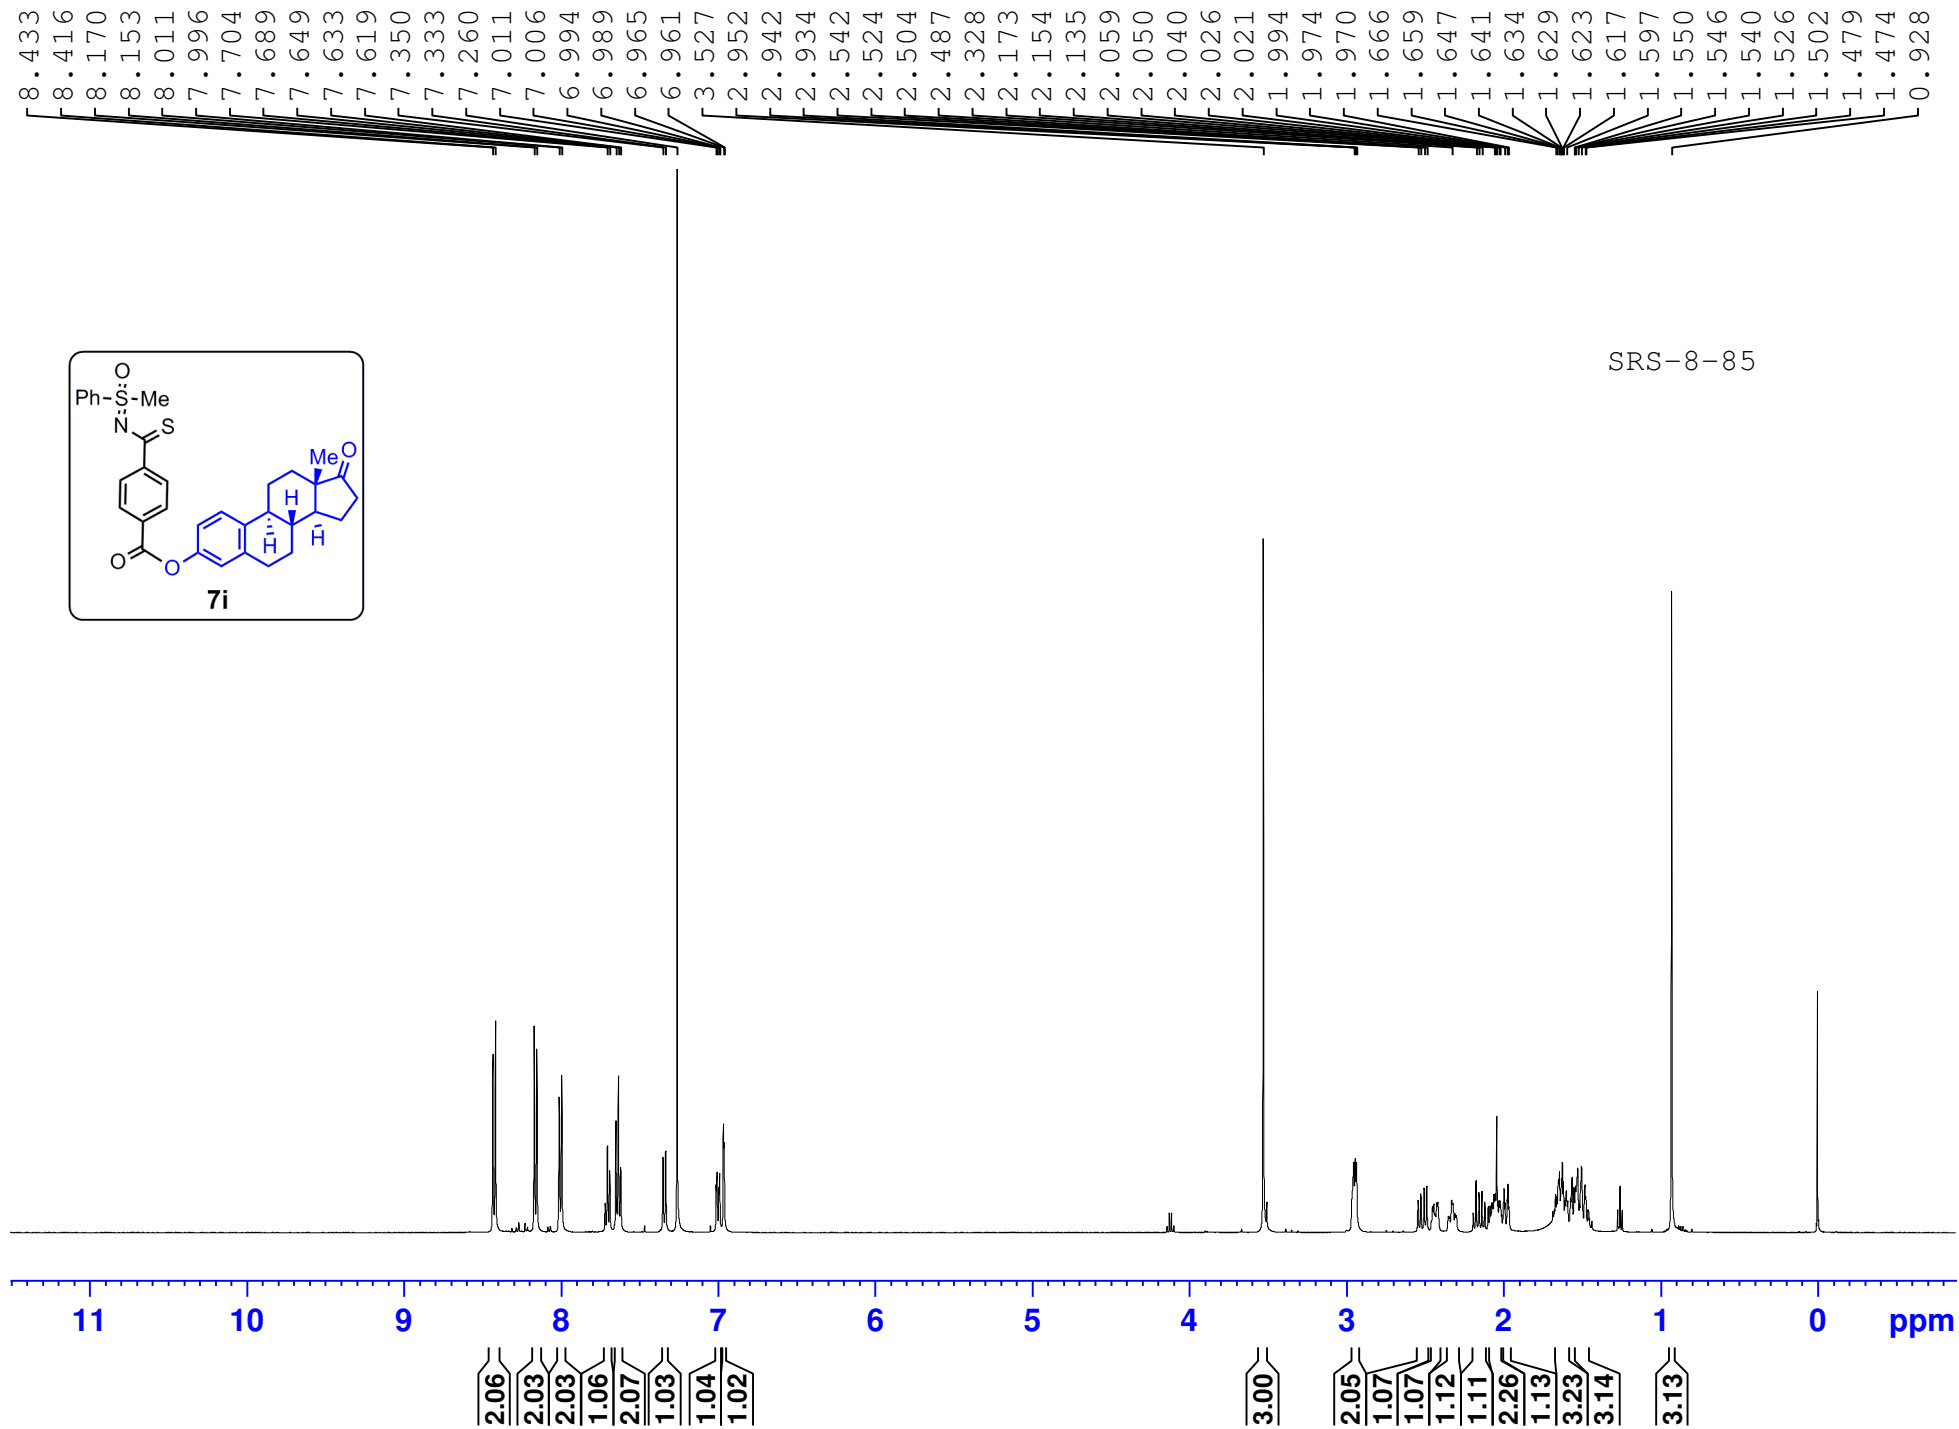

SRS-8-85

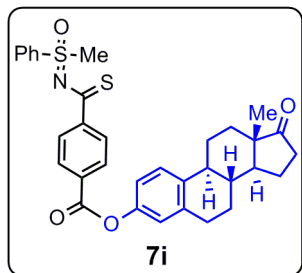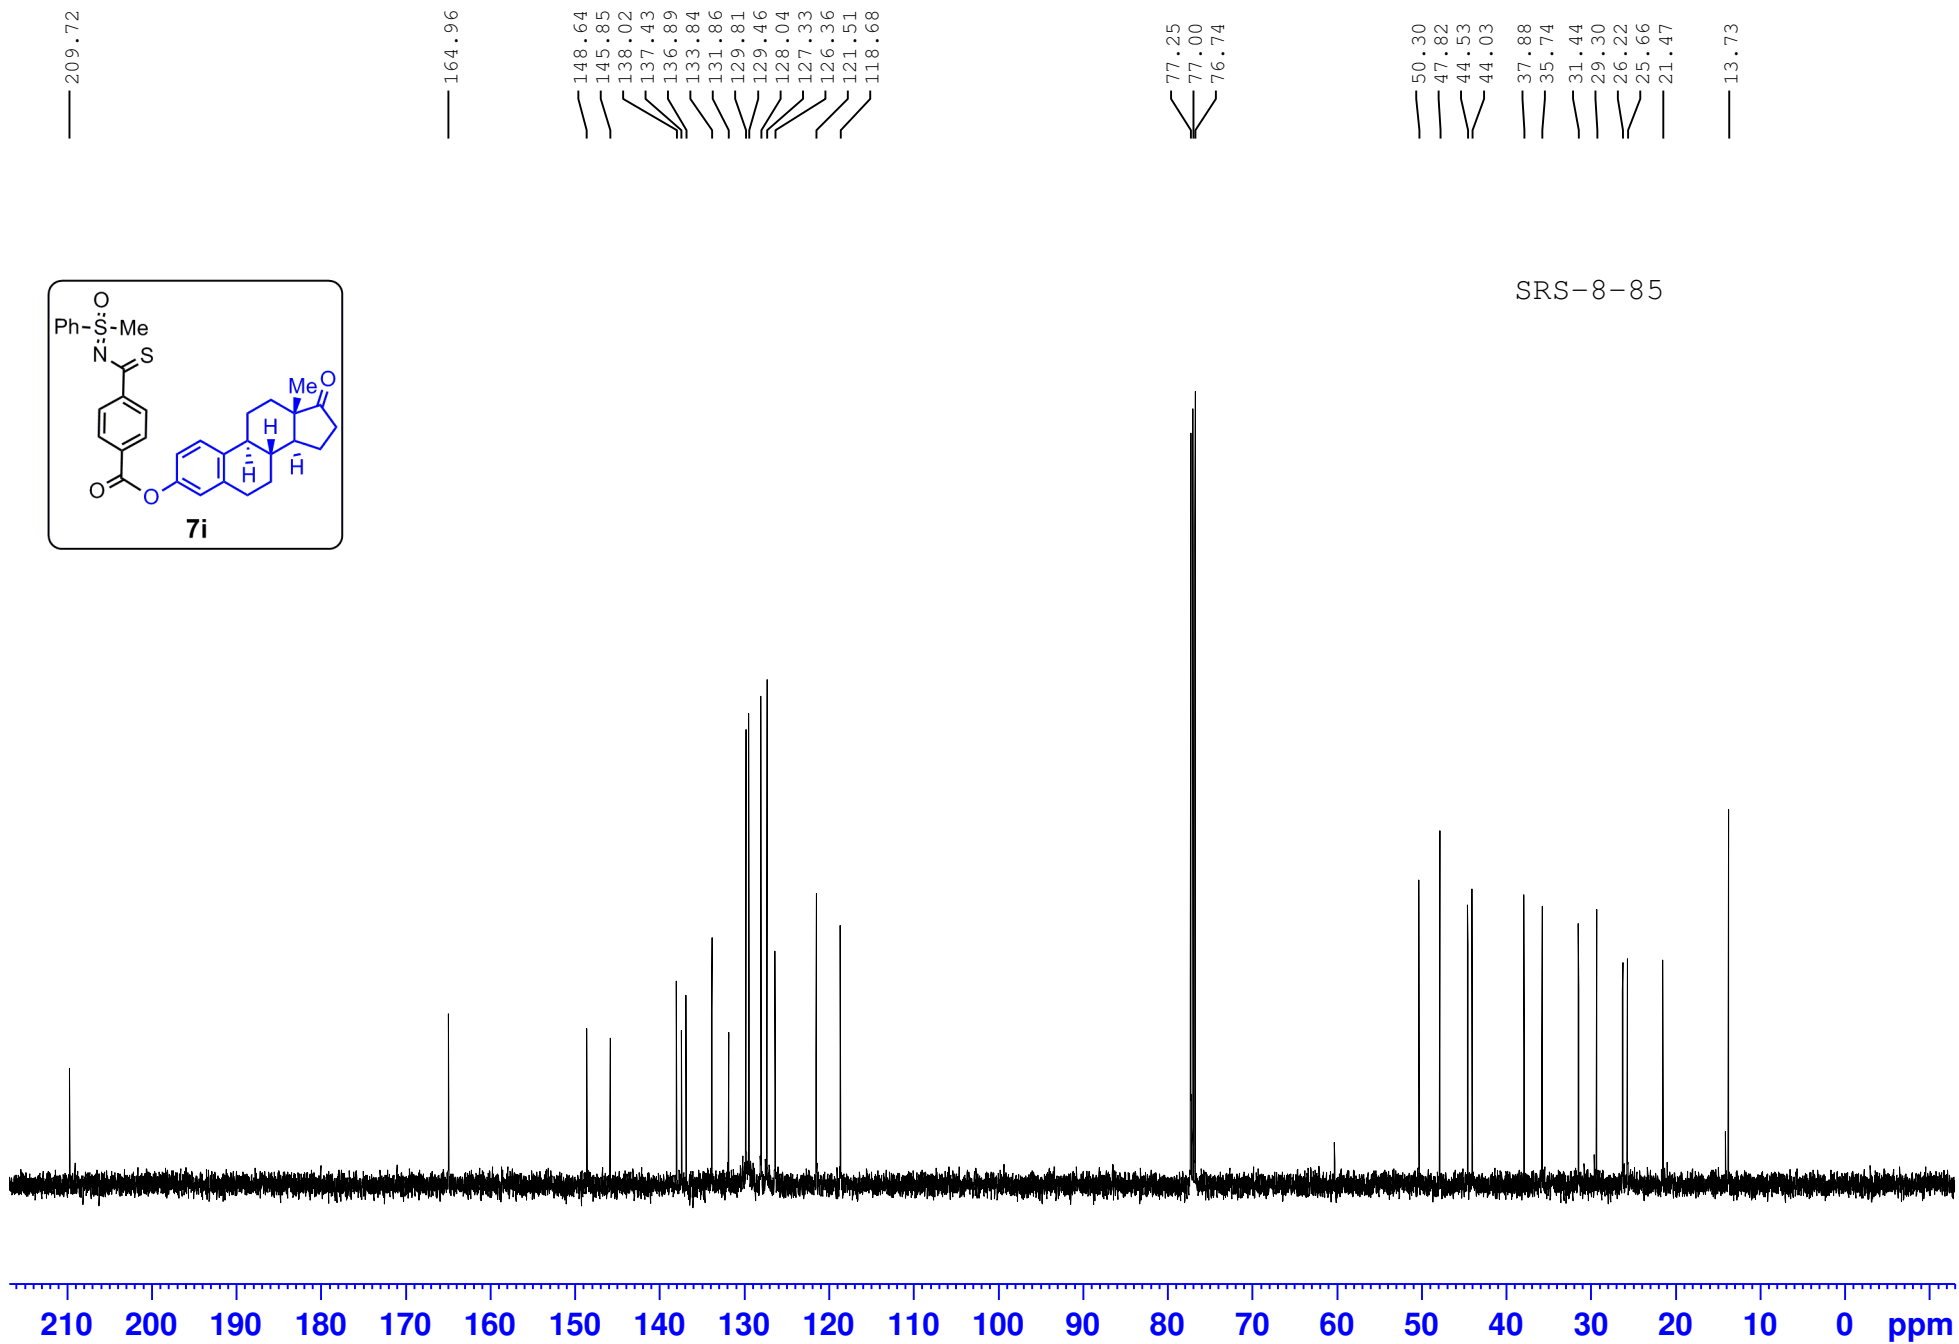

8.364  
8.347  
8.019  
8.002  
7.995  
7.979  
7.707  
7.692  
7.678  
7.636  
7.620  
7.605  
7.260  
4.983  
4.973  
4.963  
3.659  
3.512  
2.349  
2.338  
2.328  
2.318  
2.247  
2.234  
2.227  
2.214  
2.203  
1.992  
1.969  
1.875  
1.856  
1.817  
1.796  
1.783  
1.694  
1.670  
1.581  
1.556  
1.552  
1.536  
1.512  
1.447  
1.419  
1.292  
1.270  
1.249  
1.224  
1.195  
1.142  
1.123  
1.103  
1.085  
1.075  
0.960  
0.921  
0.908  
0.655

MJ-LI SM

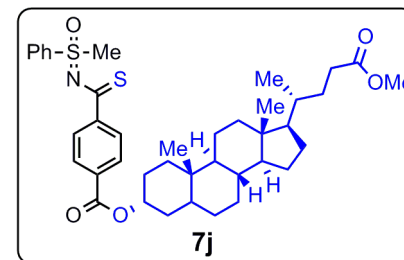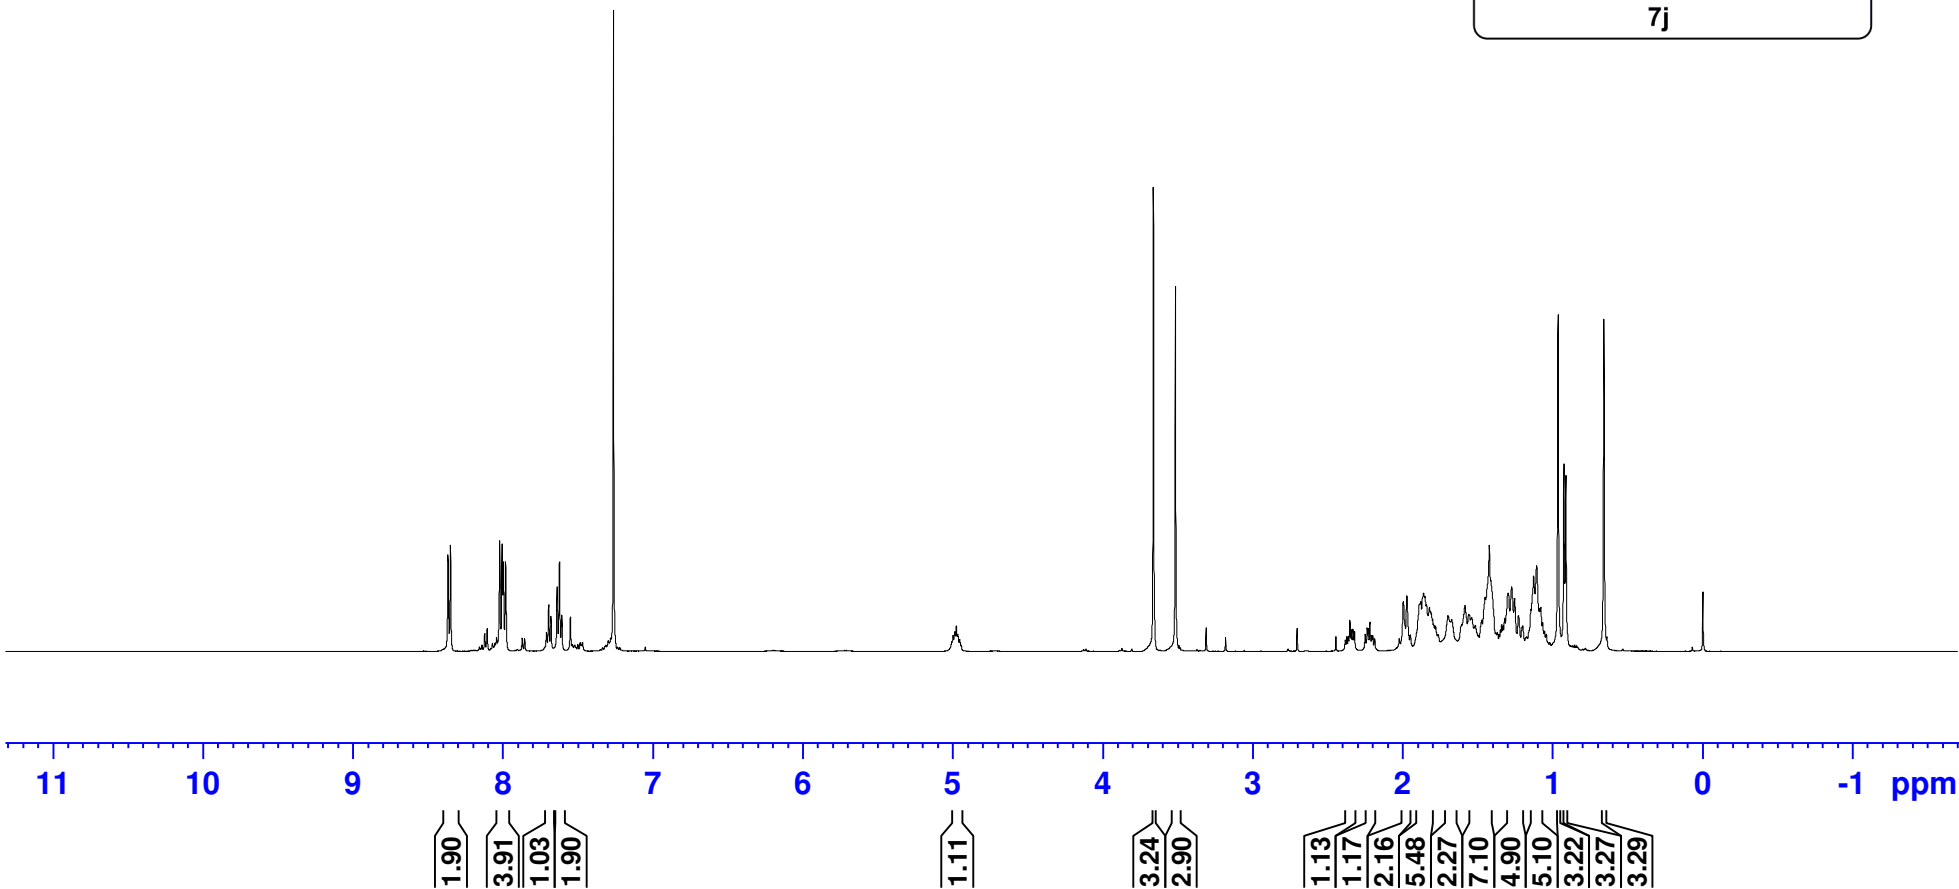



— 210.20  
— 174.75  
— 165.77  
— 145.32  
137.19  
133.86  
133.38  
129.87  
128.95  
127.93  
127.43

77.25  
77.00  
76.74  
75.34  
56.45  
55.97  
51.45  
44.64  
42.74  
41.98  
40.48  
40.11  
35.81  
35.34  
35.07  
34.64  
32.33  
31.04  
31.00  
28.16  
27.04  
26.74  
26.32  
24.16  
23.34  
20.87  
18.26  
12.03

MJ-LI SM

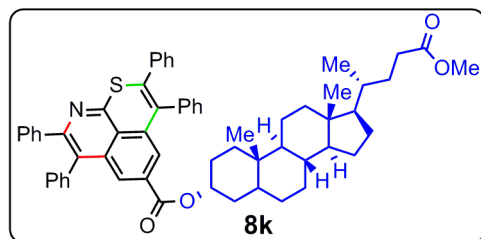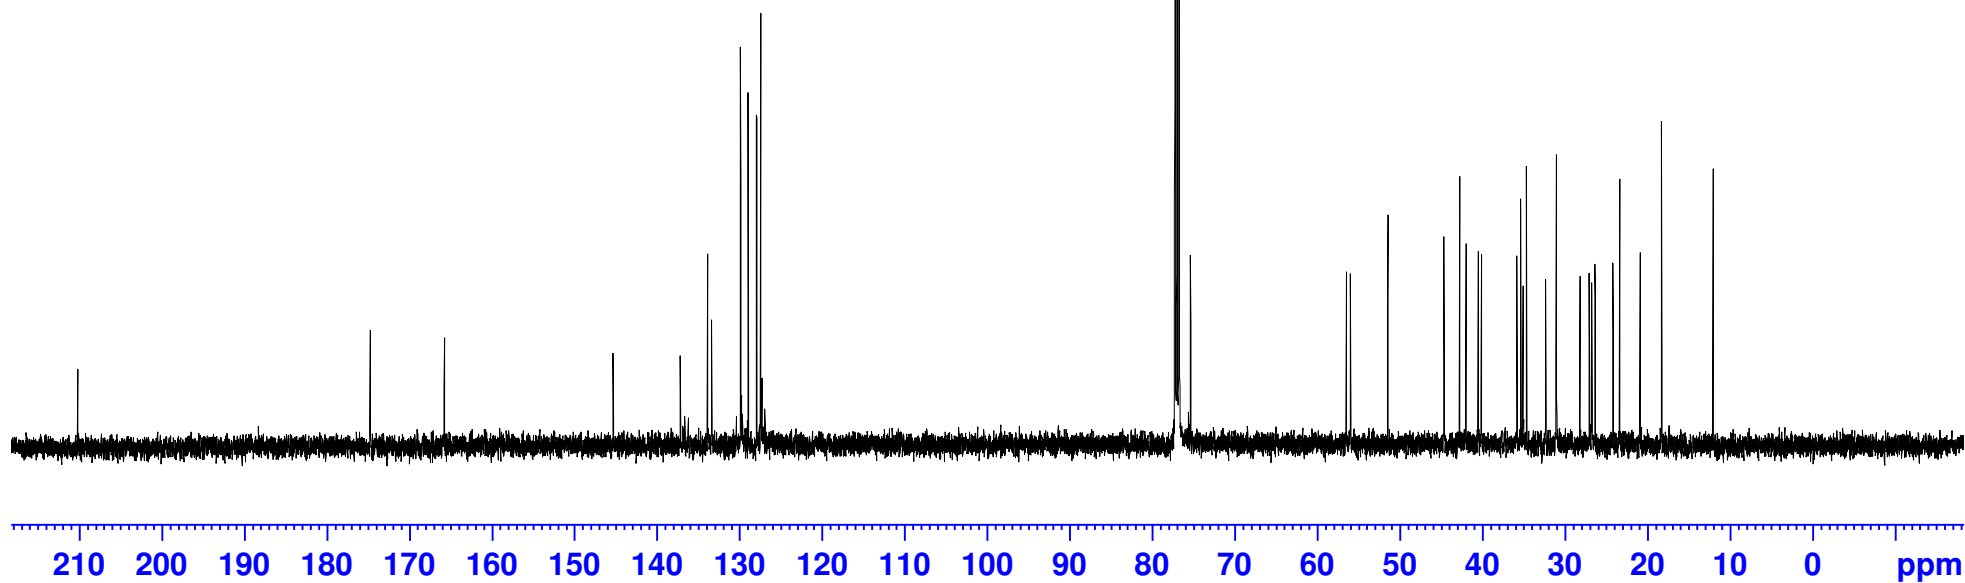

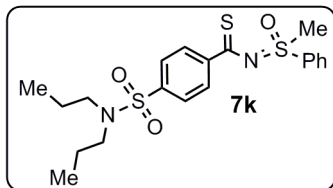

8.407  
8.390  
7.956  
7.941  
7.753  
7.735  
7.682  
7.668  
7.653  
7.609  
7.593  
7.578  
7.260

3.489  
3.065  
3.050  
3.034

1.562  
1.548  
1.533  
1.517  
1.502  
1.487  
0.860  
0.846  
0.831

Majji-MJ-17- 115

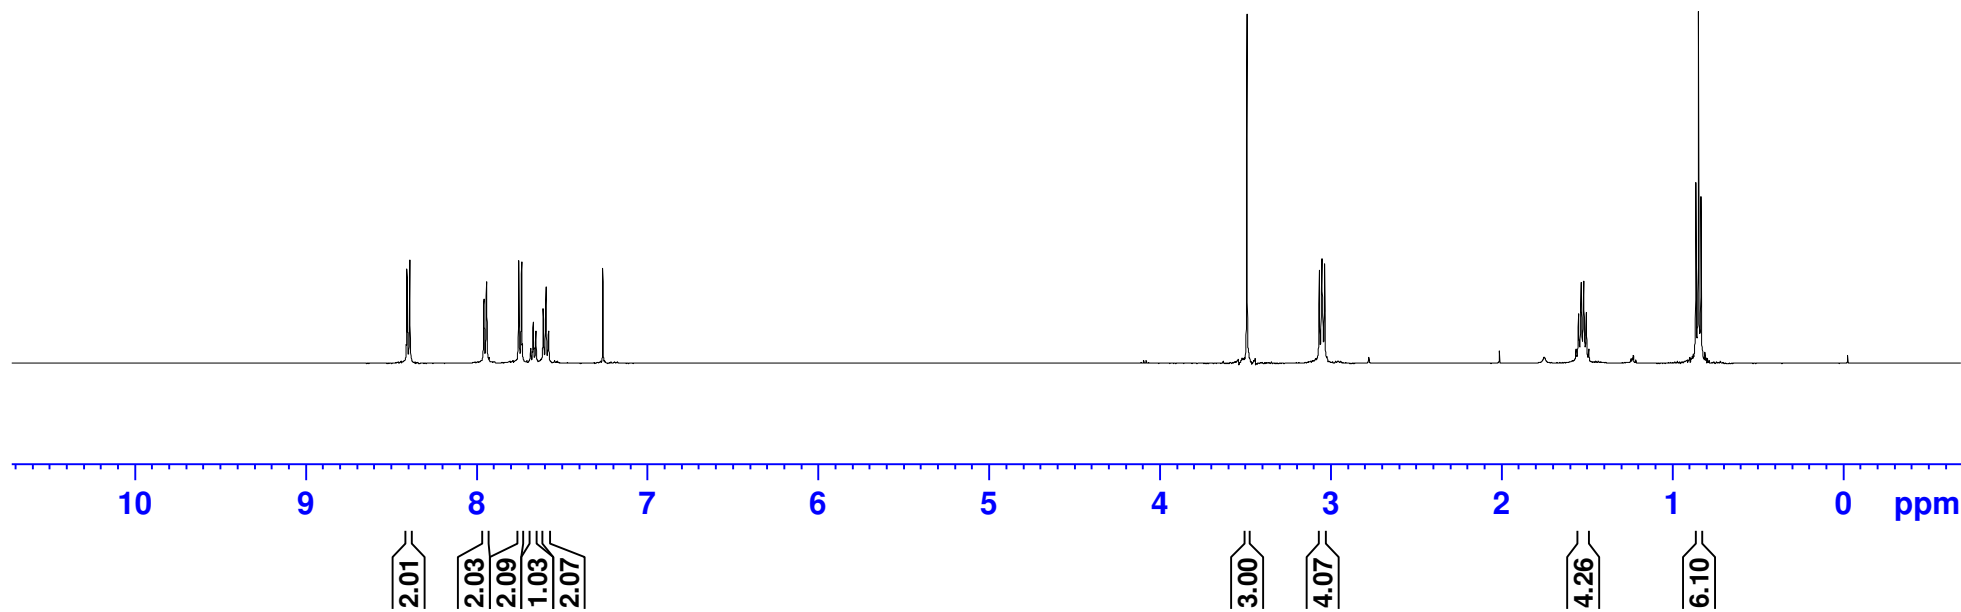

208.98

144.82  
142.35  
136.77  
133.88  
129.79  
128.49  
127.29  
126.29

77.25  
77.00  
76.74

49.97  
44.51

21.90

11.05

Majji-MJ-17- 115

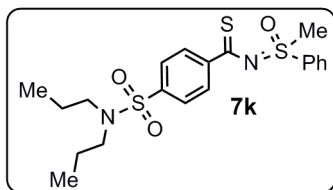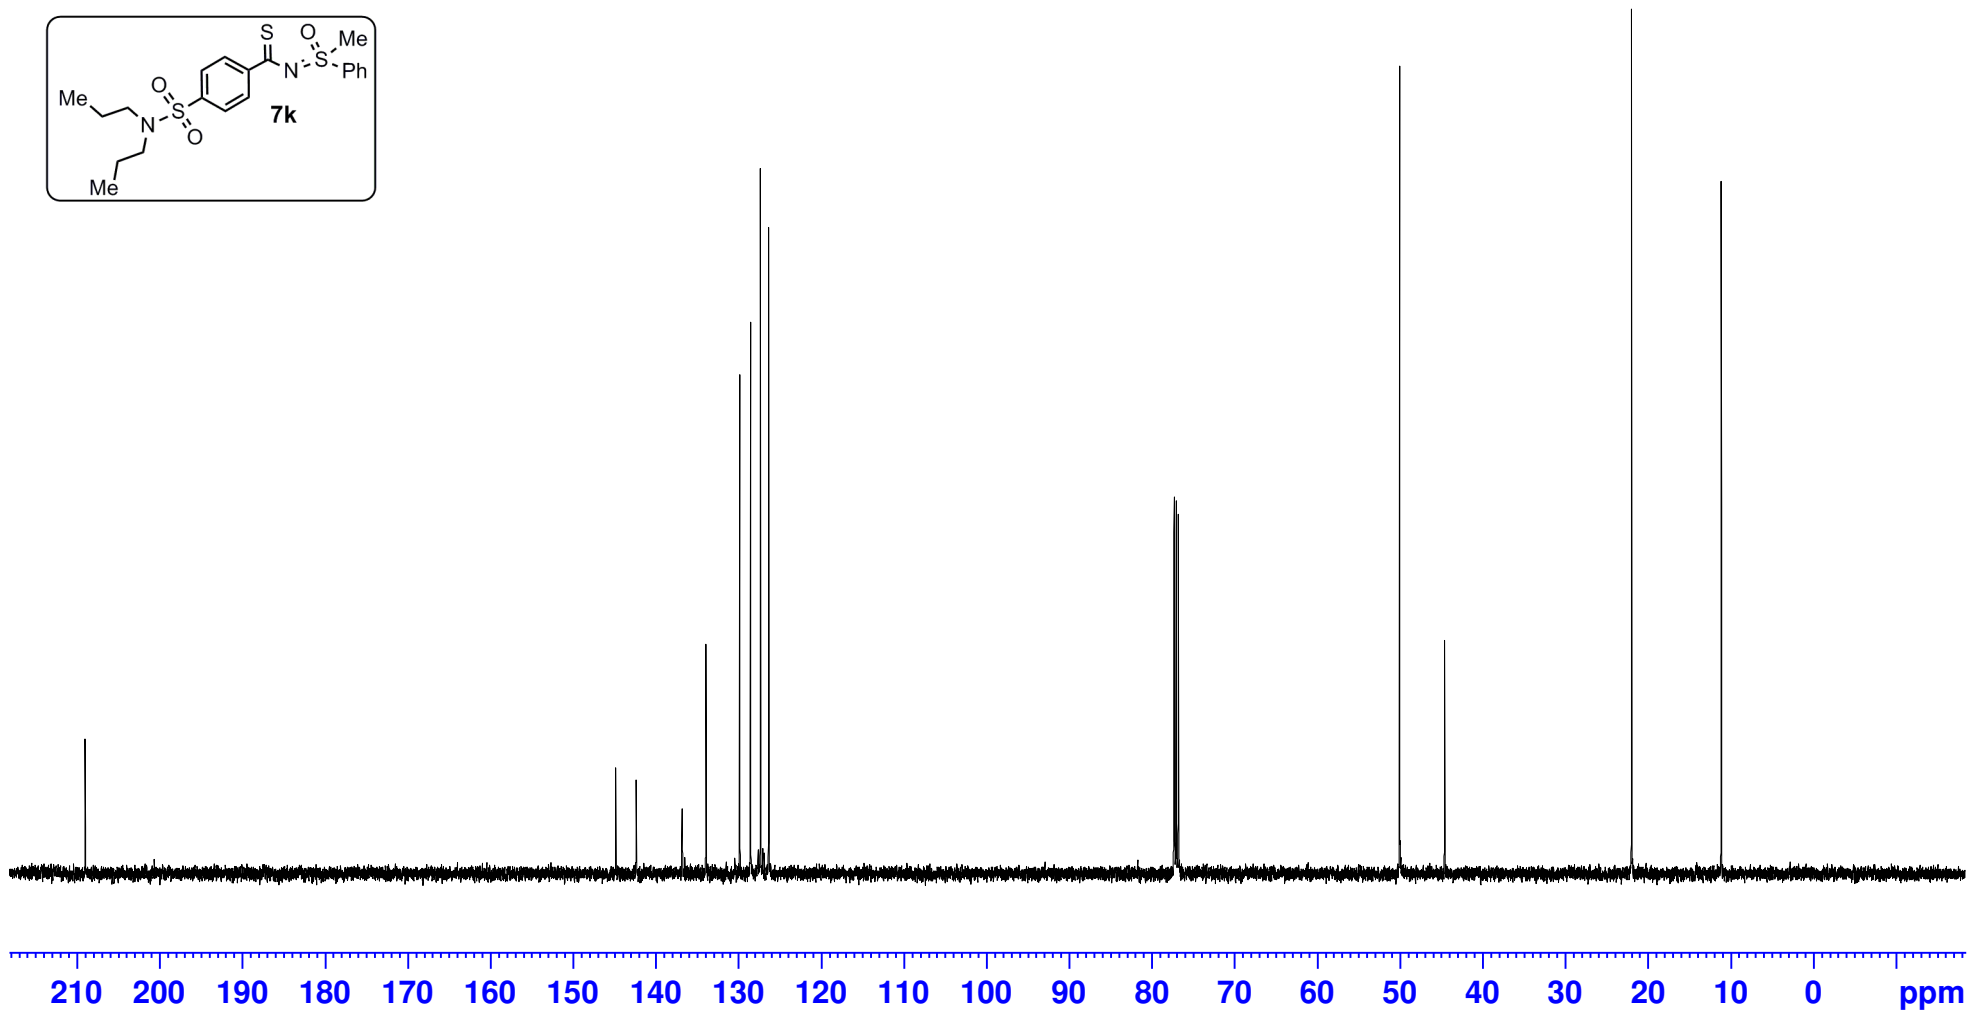

SRS-8-92

8.312  
8.295  
7.967  
7.952  
7.666  
7.651  
7.636  
7.594  
7.578  
7.564  
7.308  
7.291  
7.260  
7.098  
7.095  
7.083  
7.080  
6.978  
6.974  
6.962  
6.960  
6.947  
6.943  
6.878  
6.876  
6.863  
6.861  
6.848  
6.846  
6.611  
6.609  
6.595  
6.593  
5.080  
3.456

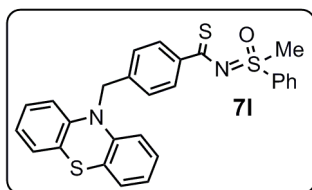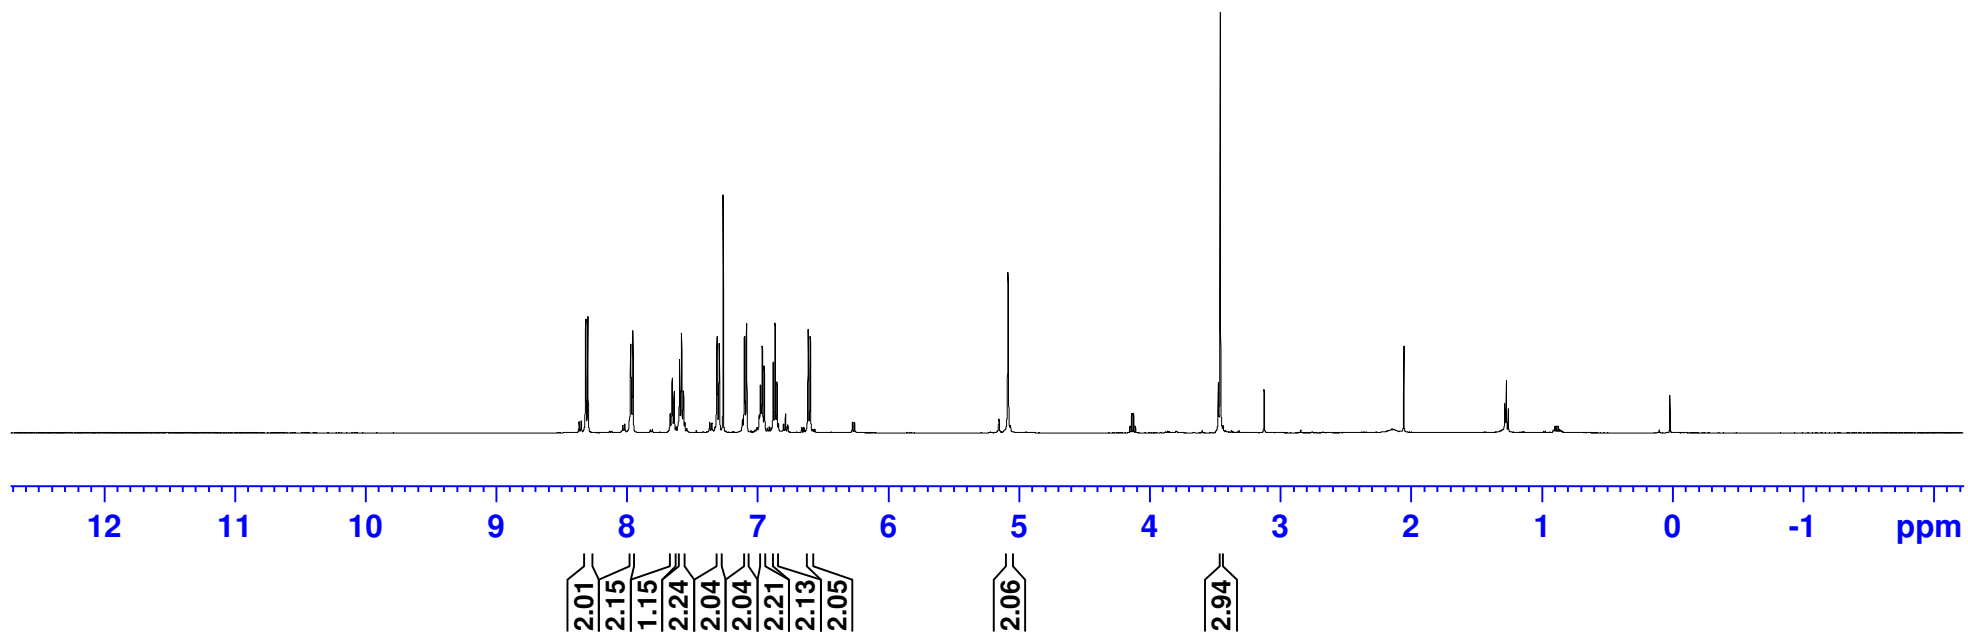

210.48

144.19  
141.25  
141.03  
137.23  
133.67  
129.73  
128.59  
127.31  
127.19  
126.79  
126.02  
123.07  
122.54  
115.34

77.25  
77.00  
76.74

52.38

44.55

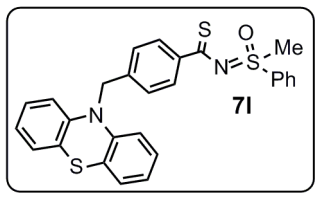

SRS-8-92

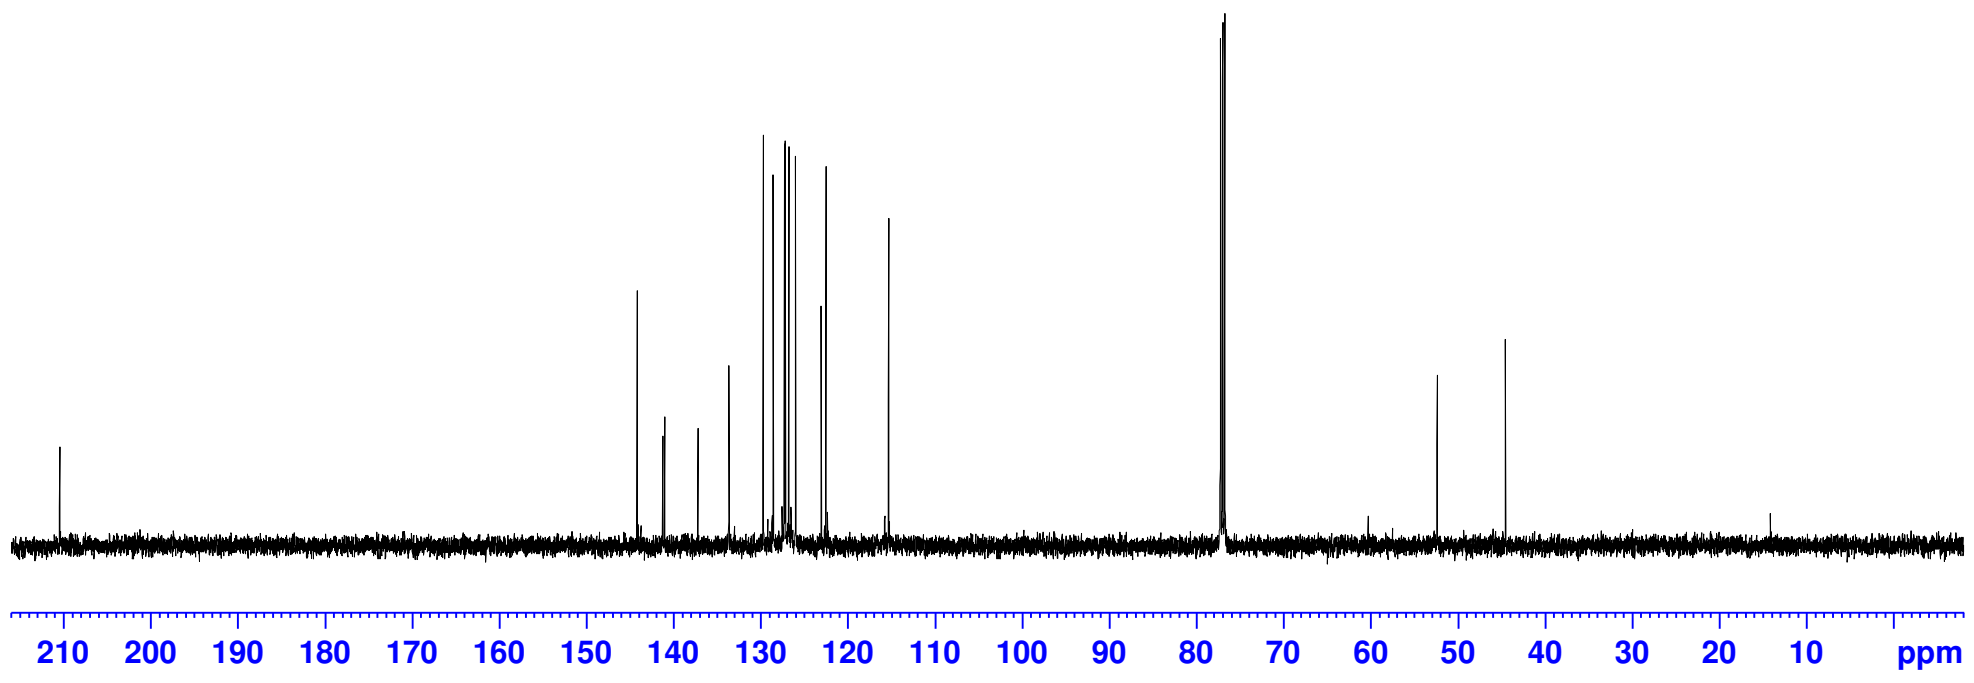

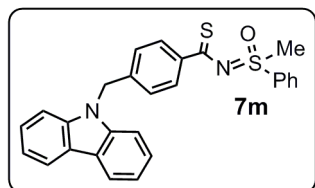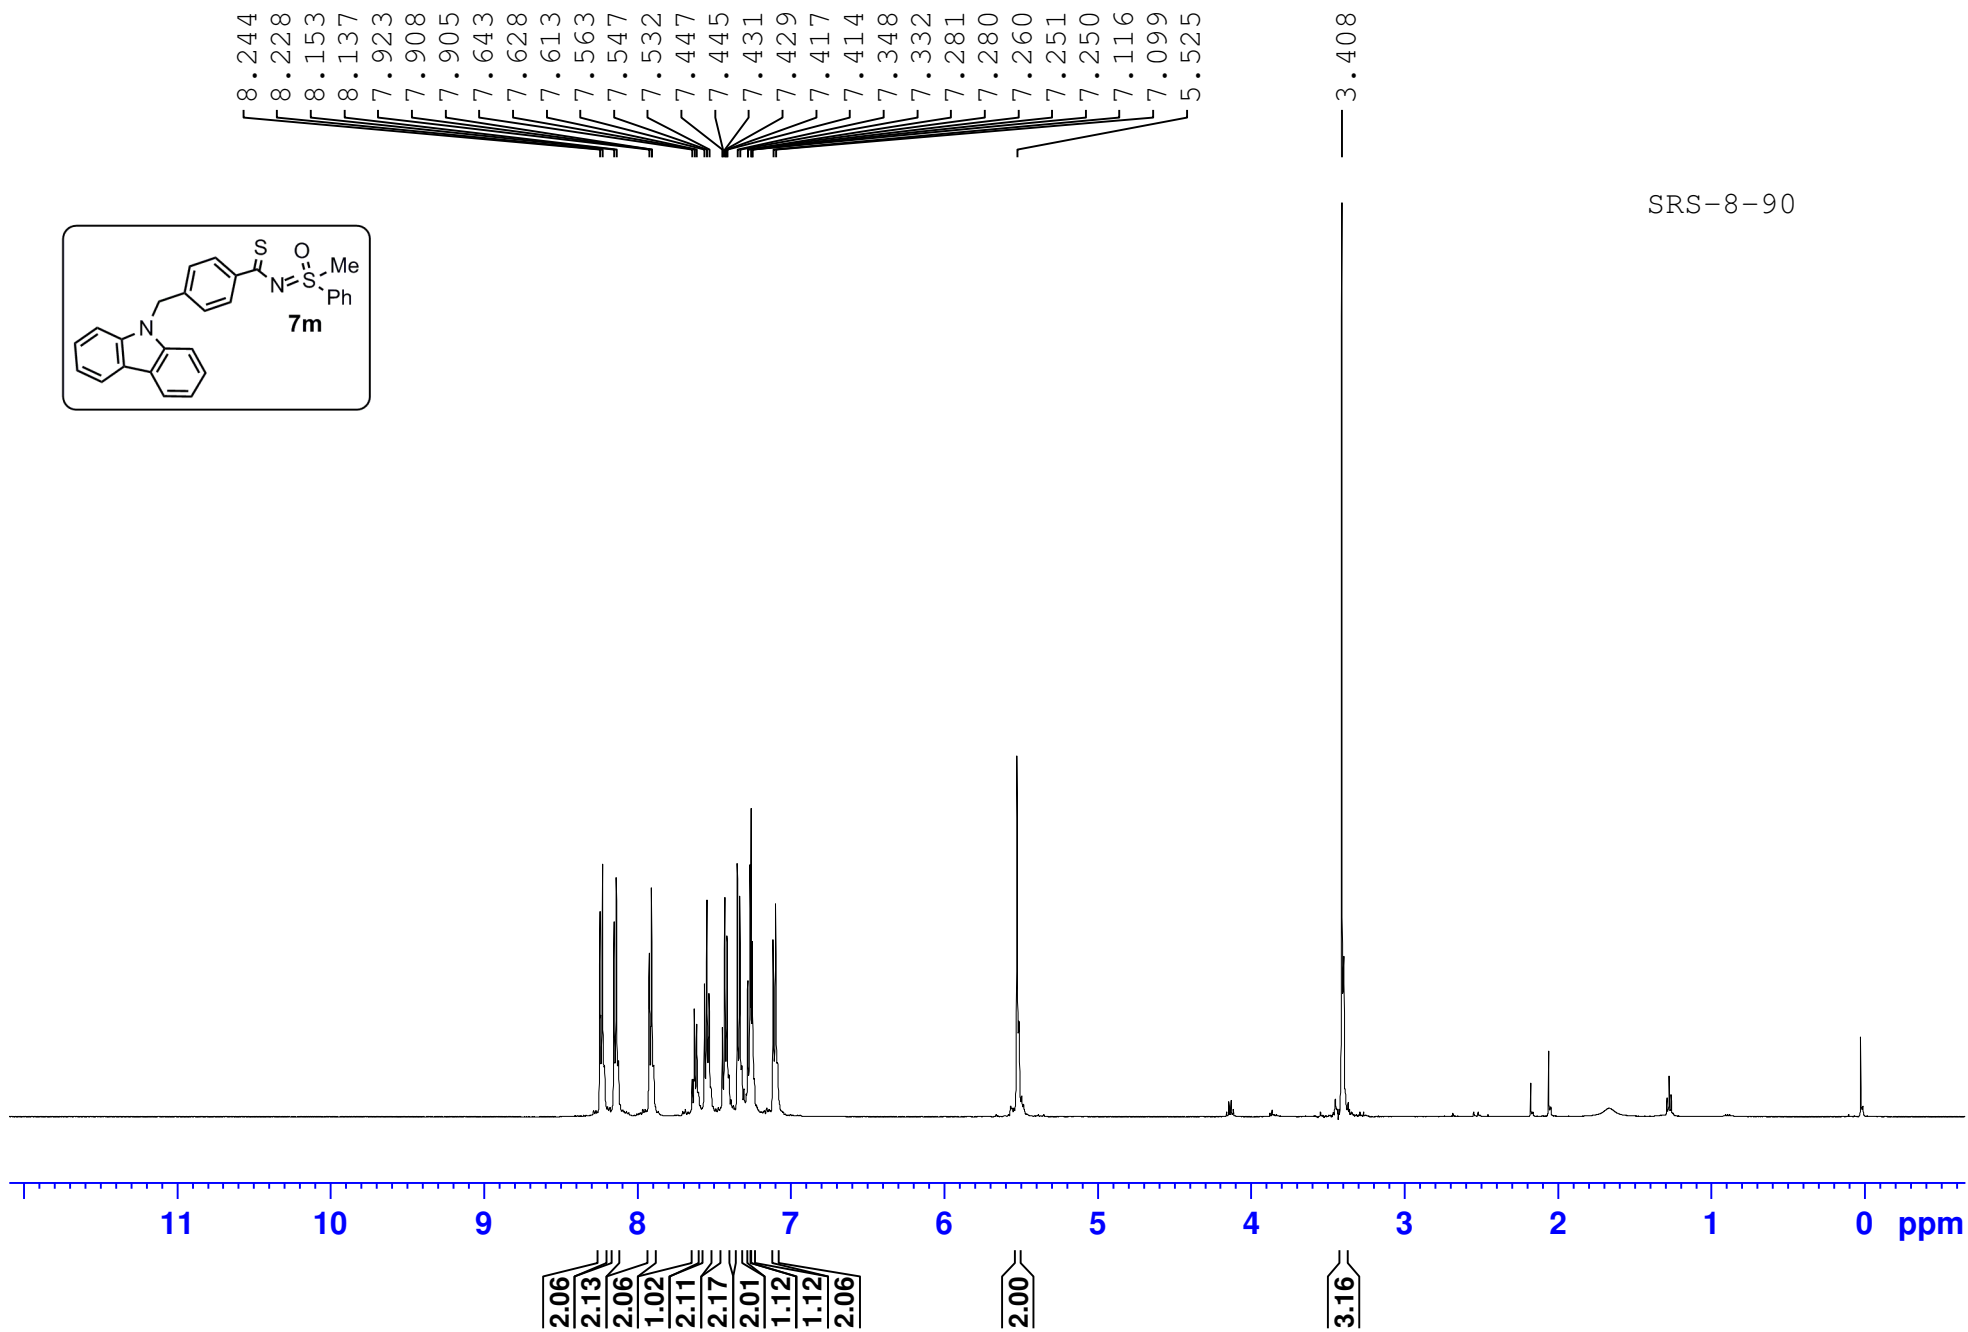

SRS-8-90

210.45

141.69  
141.19  
140.55  
137.43  
133.66  
129.72  
128.68  
127.34  
125.87  
125.76  
123.05  
120.36  
119.31  
108.85

77.25  
77.00  
76.74

46.36  
44.50

SRS-8-90

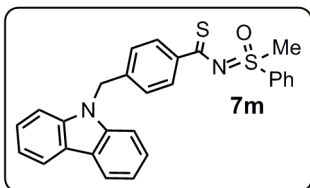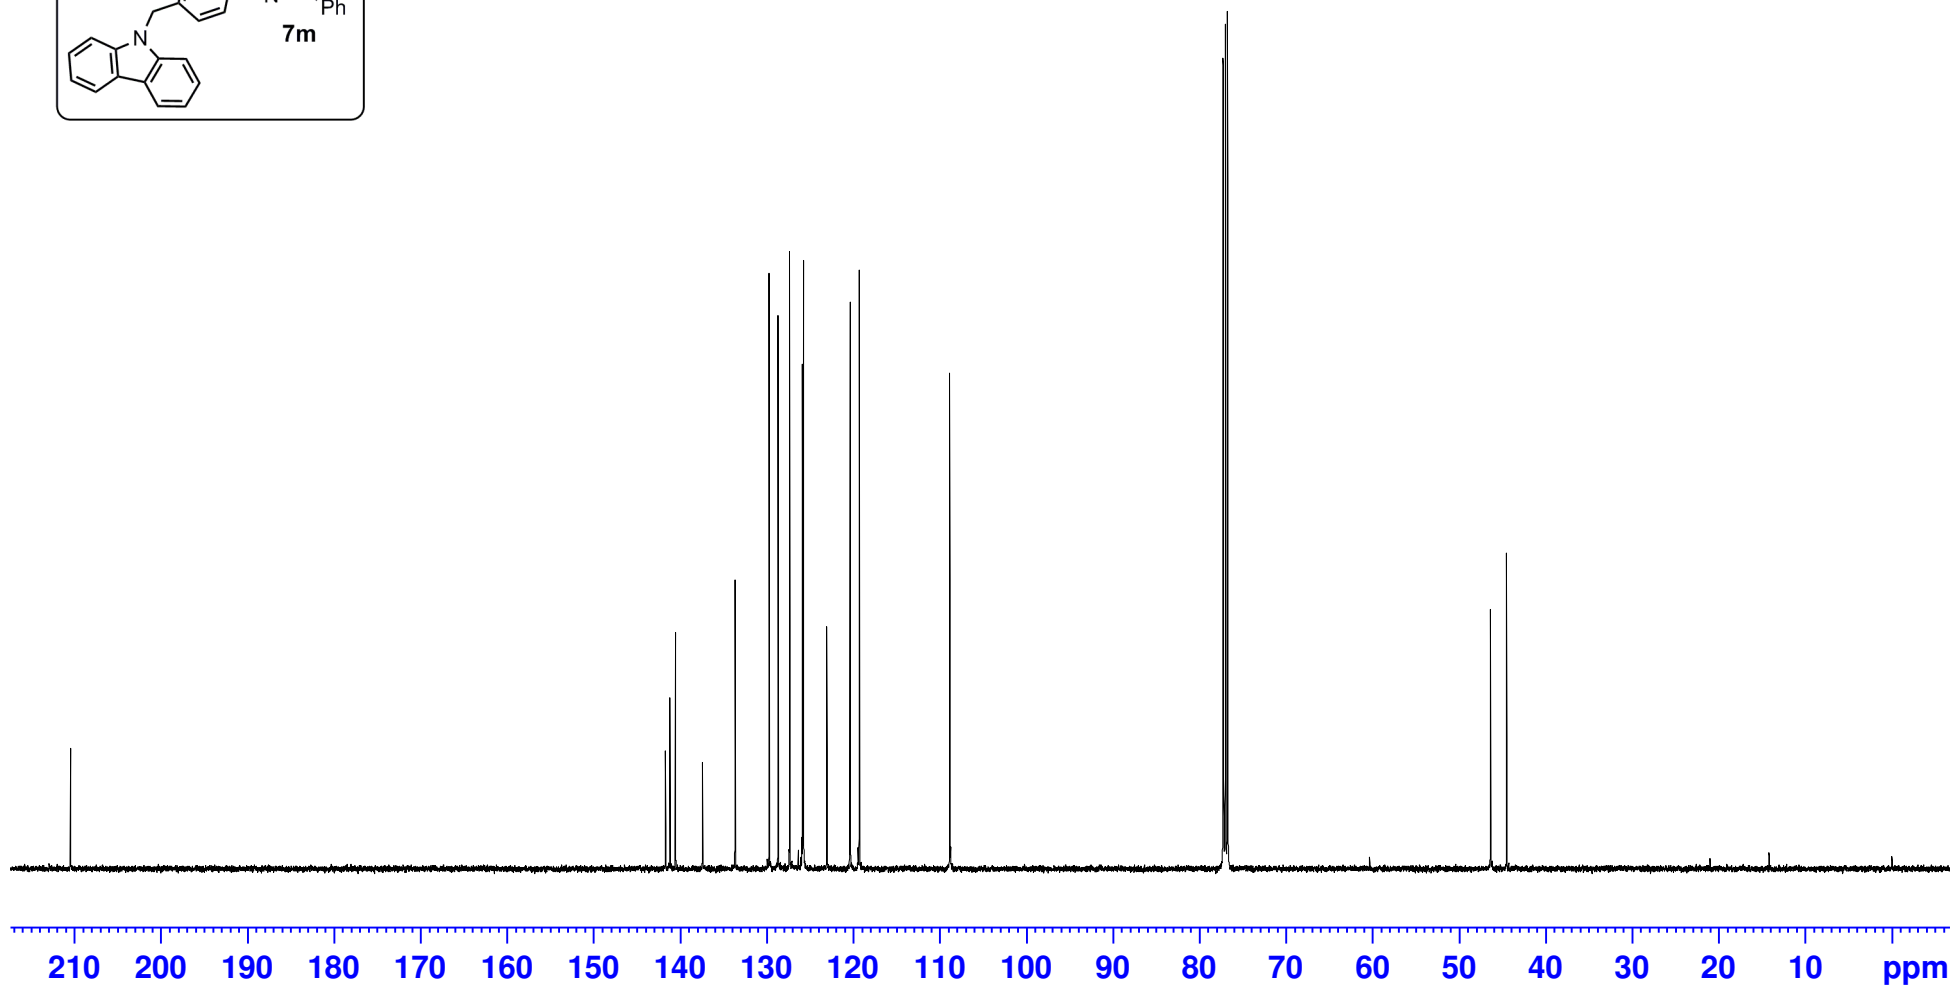

7.390  
7.376  
7.361  
7.348  
7.343  
7.332  
7.329  
7.310  
7.296  
7.281  
7.260  
7.245  
7.229  
7.225  
7.214  
7.211  
7.209  
7.205  
7.189  
7.178  
7.174  
7.168  
7.165  
7.147  
7.133  
7.044  
6.651

2.167

ARIJIT -AS-179

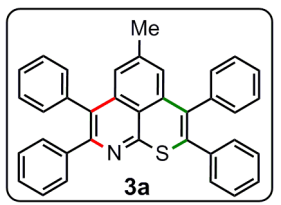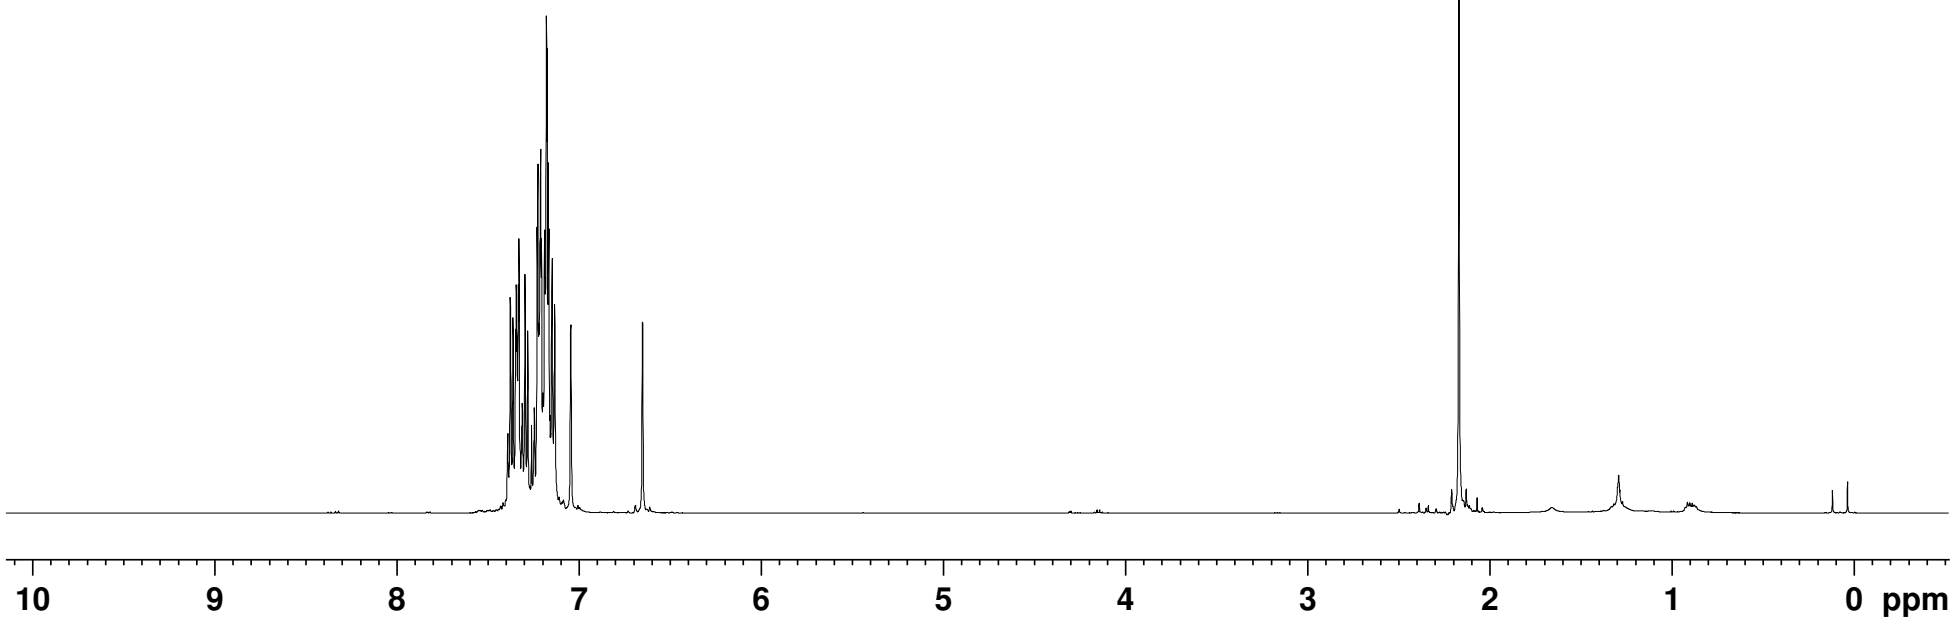

5.09  
2.08  
5.10  
6.03  
2.08  
1.02  
1.00

3.02



158.12  
150.67  
141.35  
140.20  
137.96  
137.83  
137.62  
137.42  
136.42  
136.11  
131.95  
131.14  
130.88  
130.01  
129.46  
128.58  
127.97  
127.90  
127.46  
127.15  
127.13  
127.10  
126.59  
125.04  
122.67  
122.61  
77.25  
77.00  
76.75

— 22.29

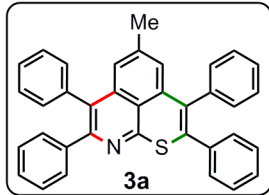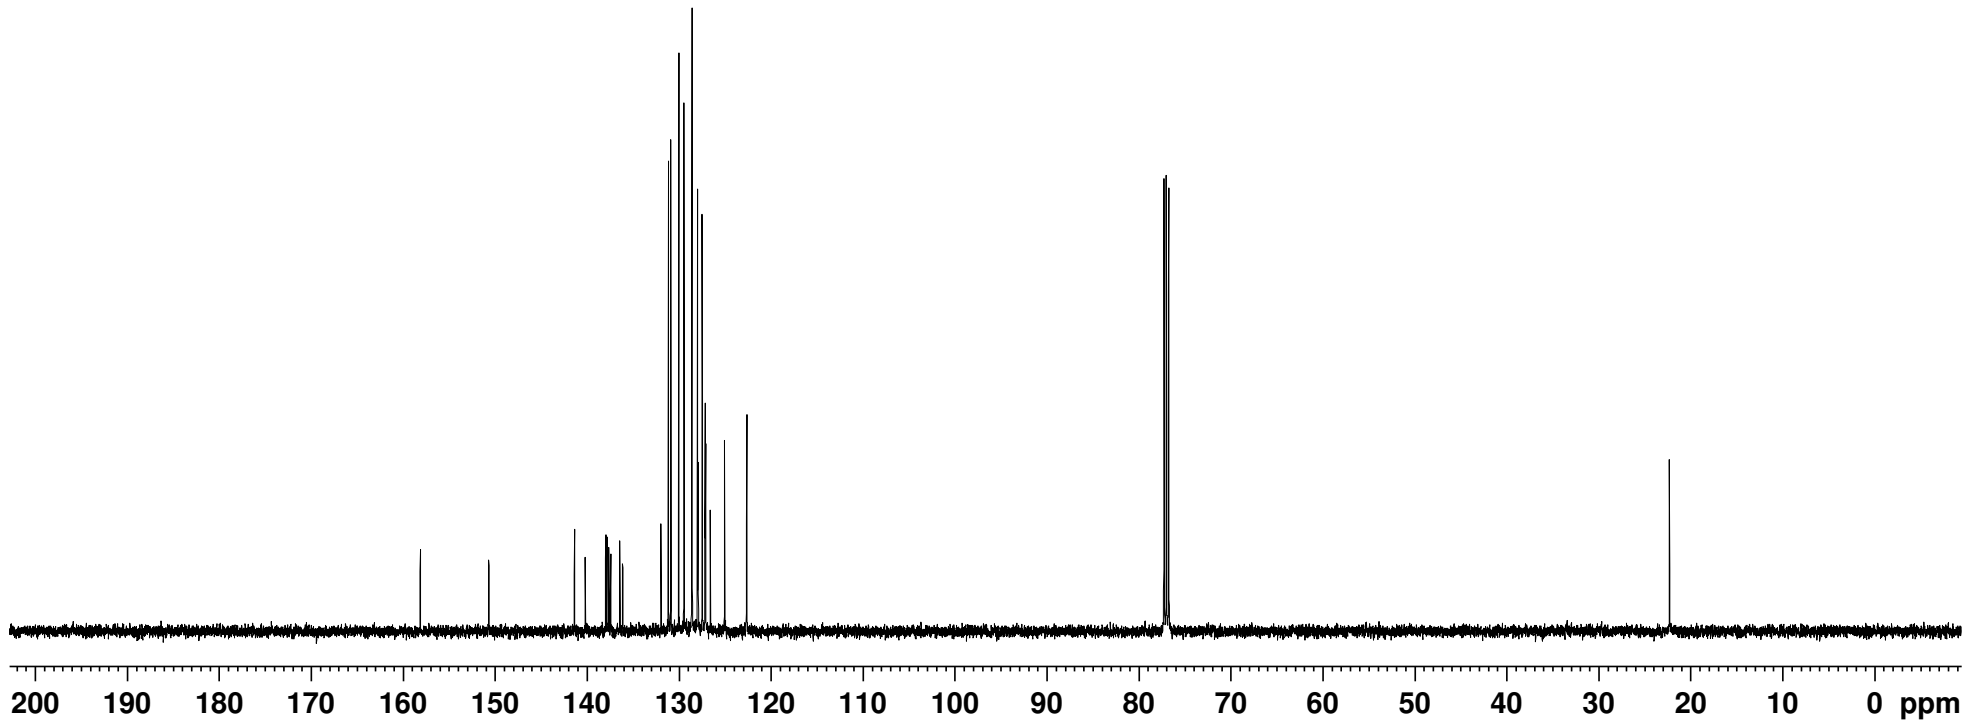

SRS-8.12

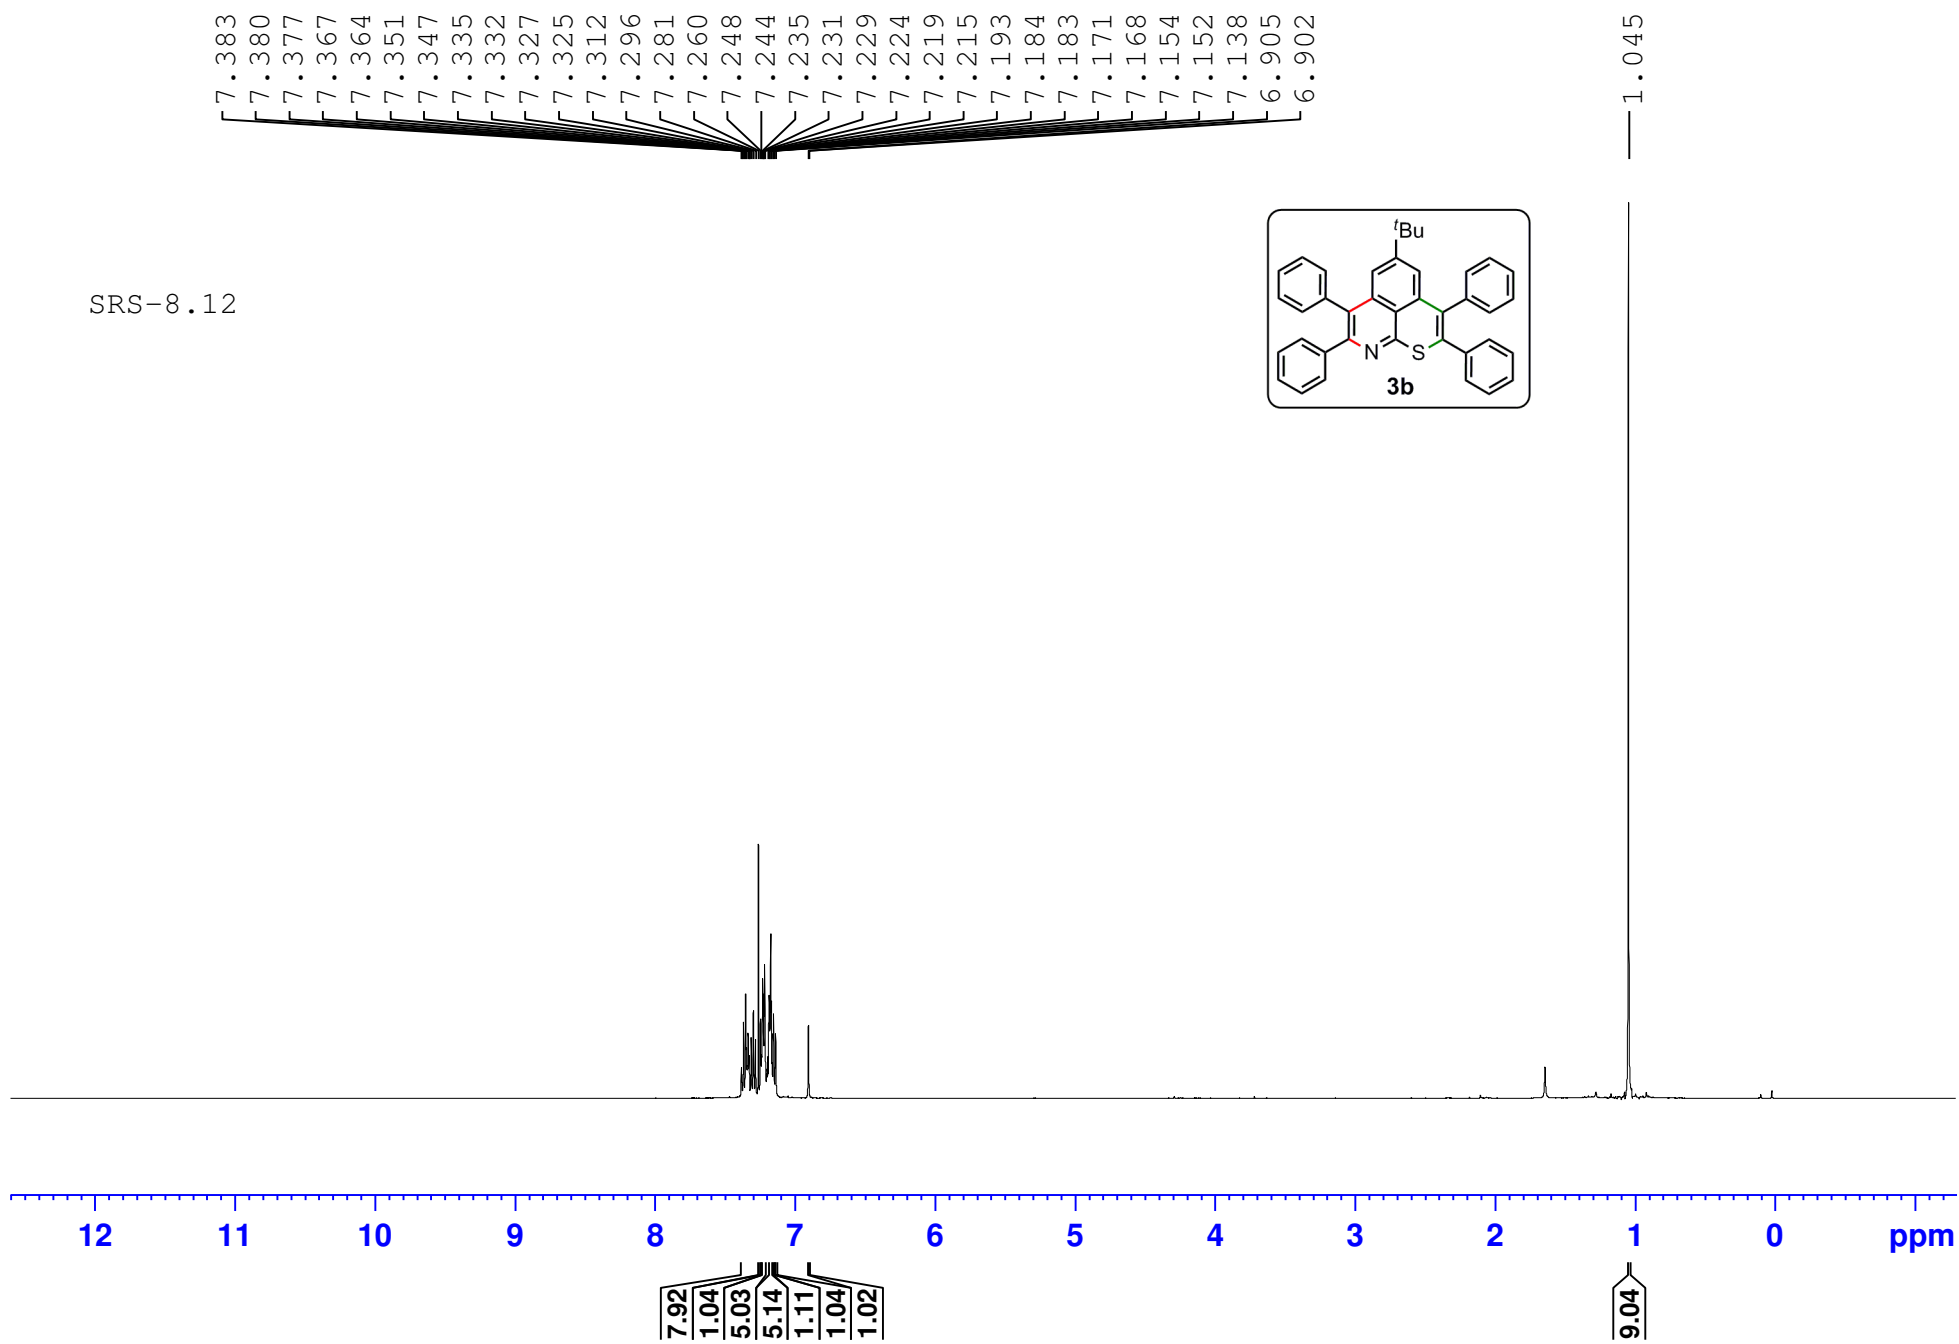

SRS-8.12

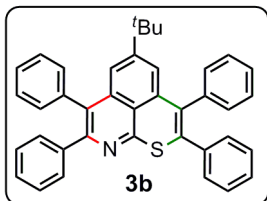

157.98  
153.94  
150.59  
140.26  
137.91  
137.69  
137.59  
137.48  
136.20  
135.51  
132.28  
131.06  
130.79  
130.03  
129.48  
128.53  
128.50  
128.00  
127.90  
127.48  
127.24  
127.17  
127.14  
127.08  
122.55  
122.18  
118.88

77.25  
77.00  
76.74

35.15  
30.56

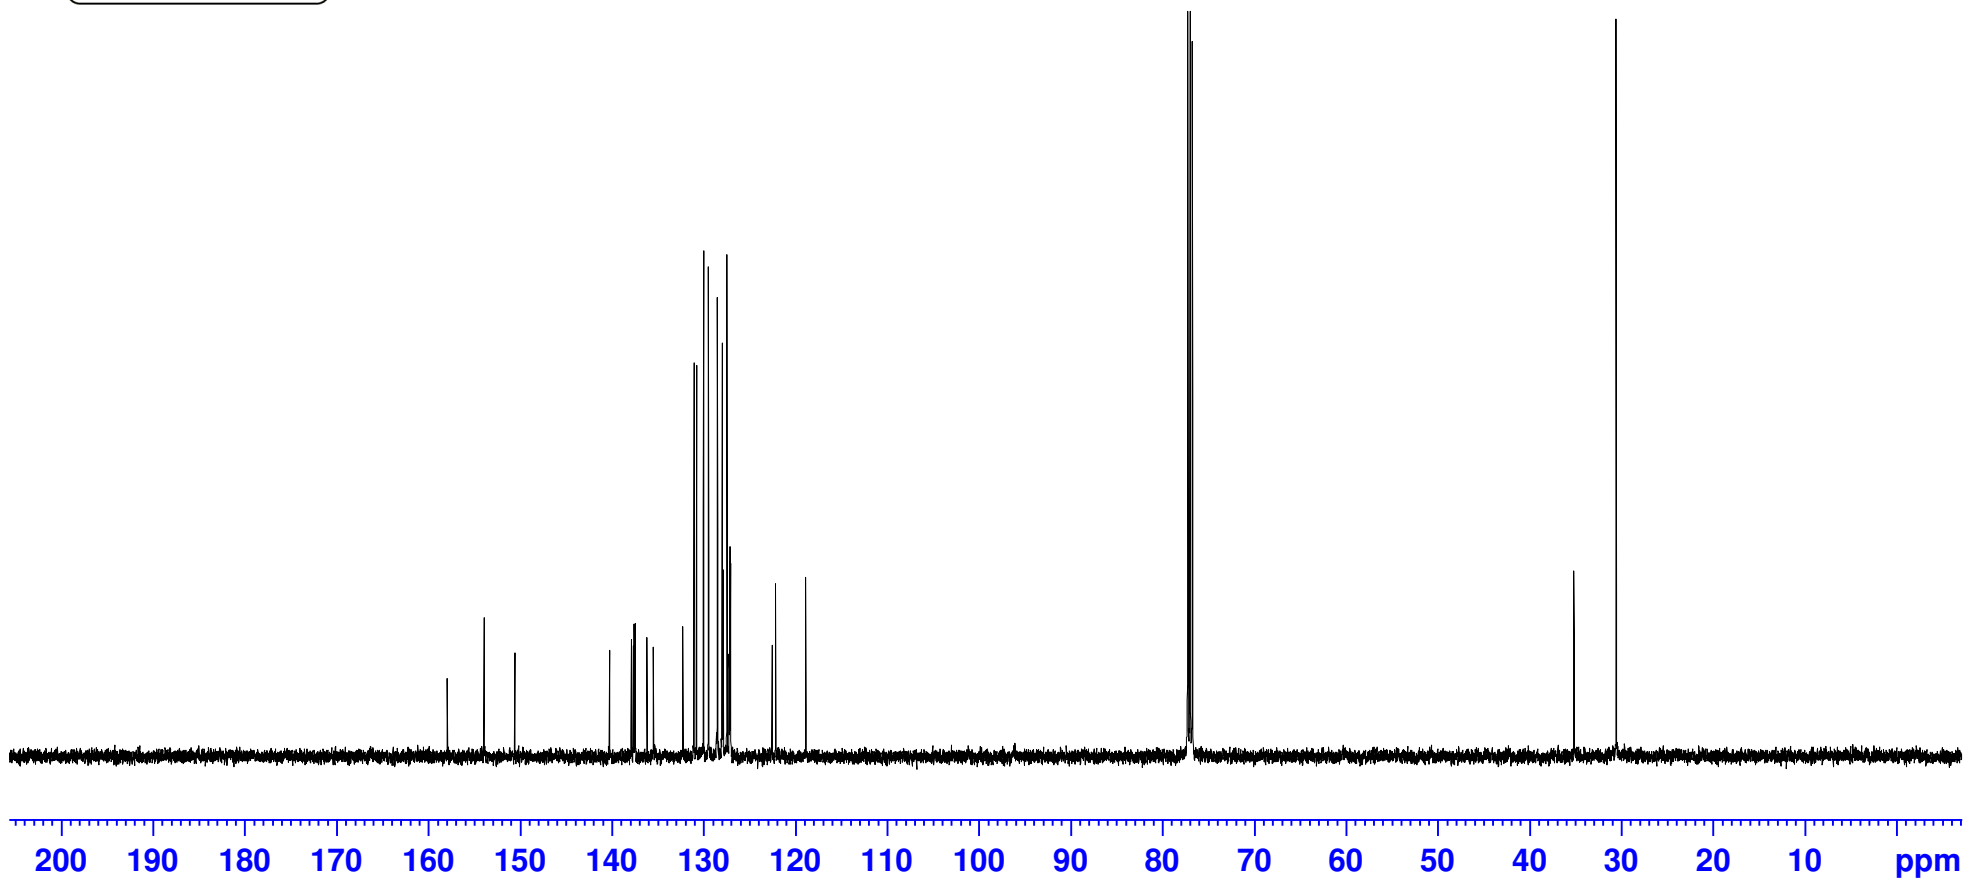

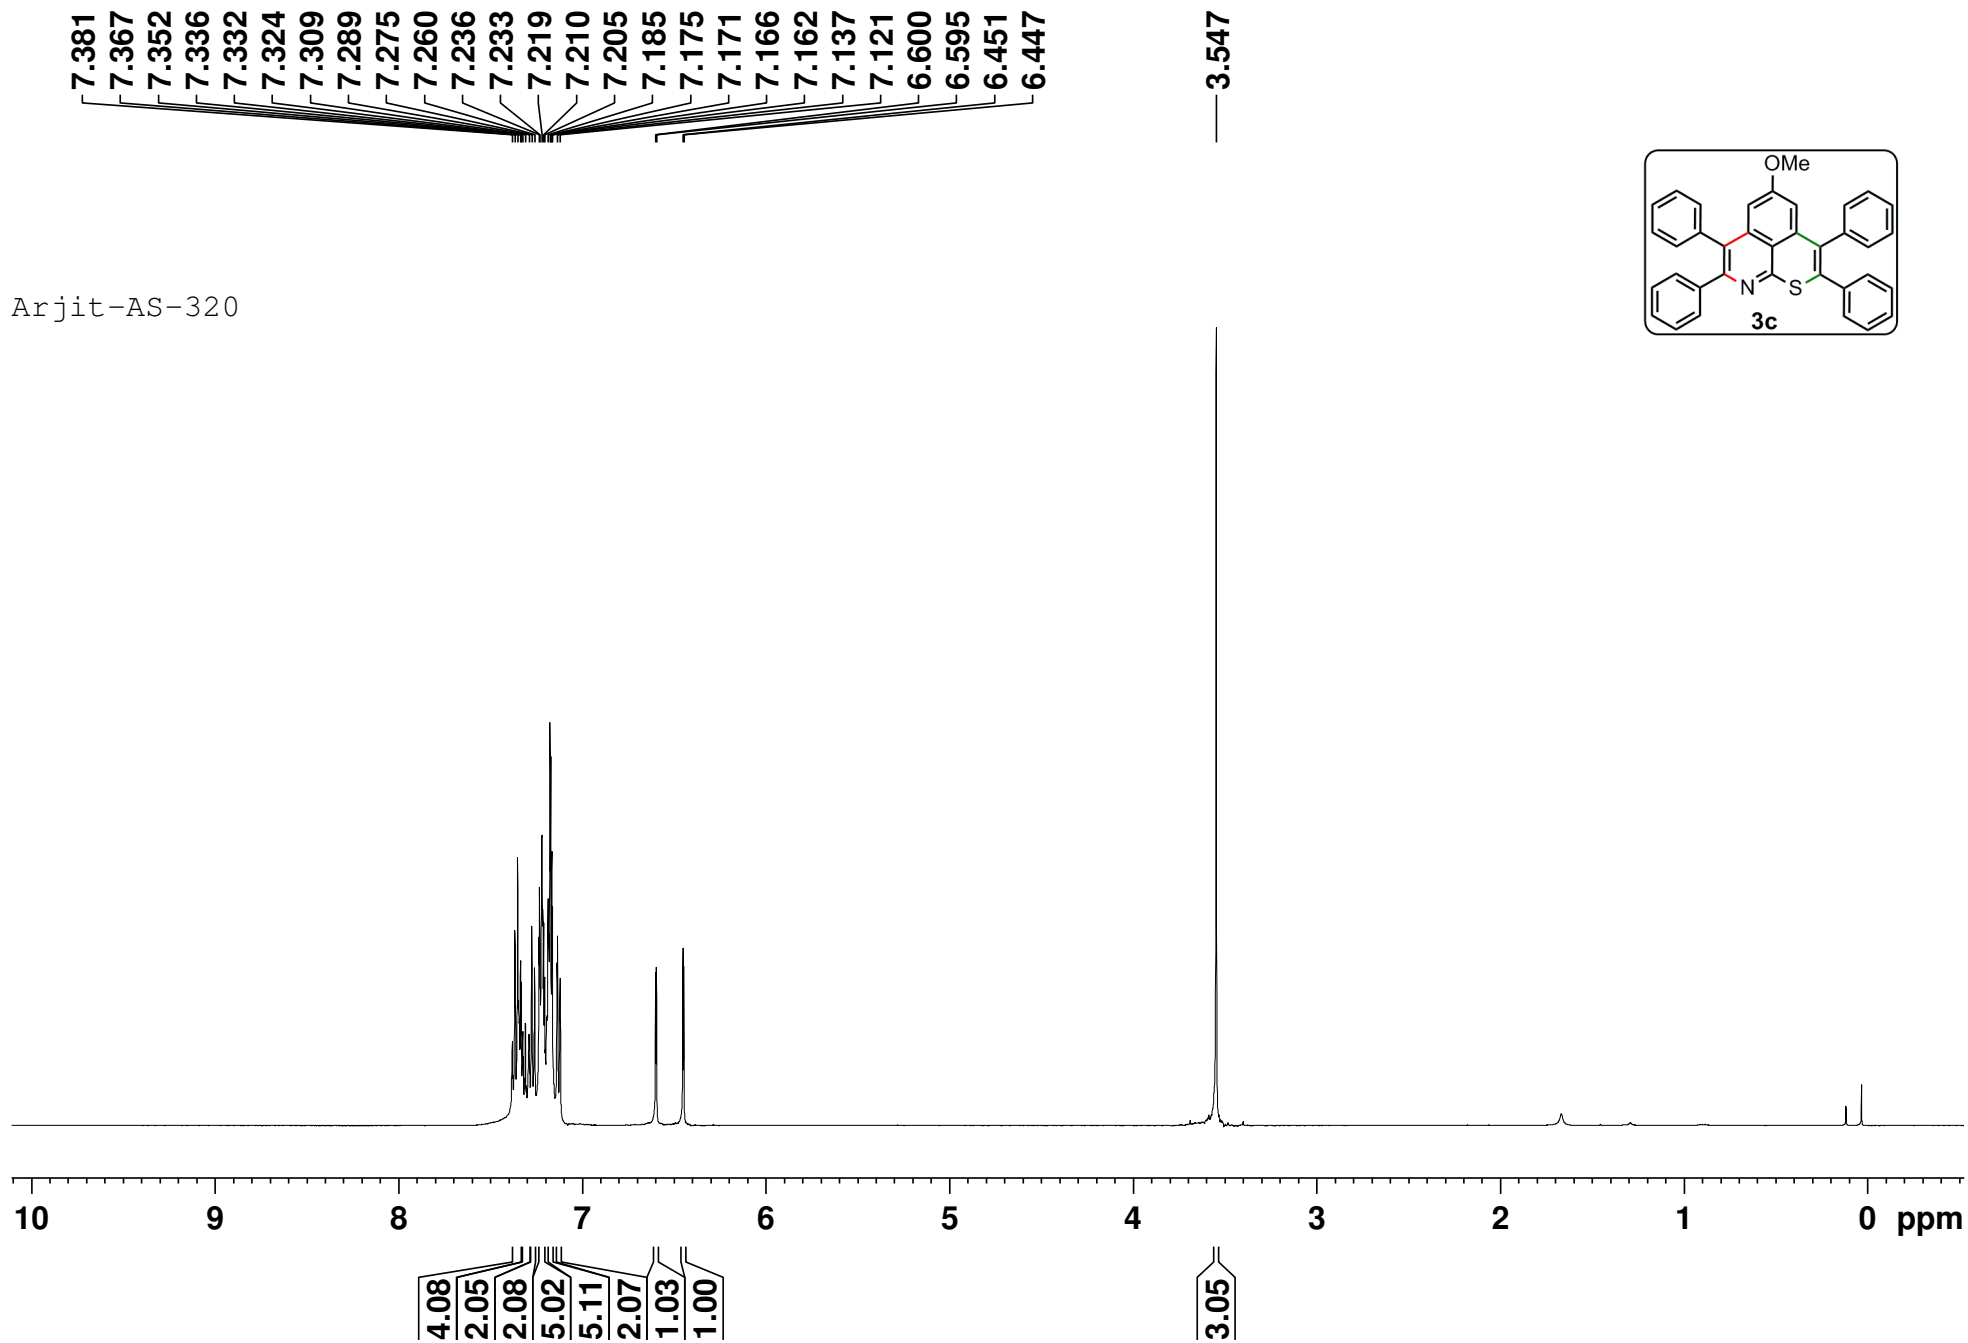

161.29  
157.59  
151.14  
140.23  
140.11  
138.68  
137.76  
137.62  
137.31  
137.04  
131.73  
131.00  
130.79  
129.99  
129.41  
128.66  
128.65  
127.98  
127.46  
127.25  
127.20  
127.13  
126.58  
120.18  
114.41  
102.71  
77.25  
77.00  
76.75

54.90

Arjit-AS-320

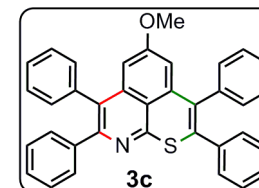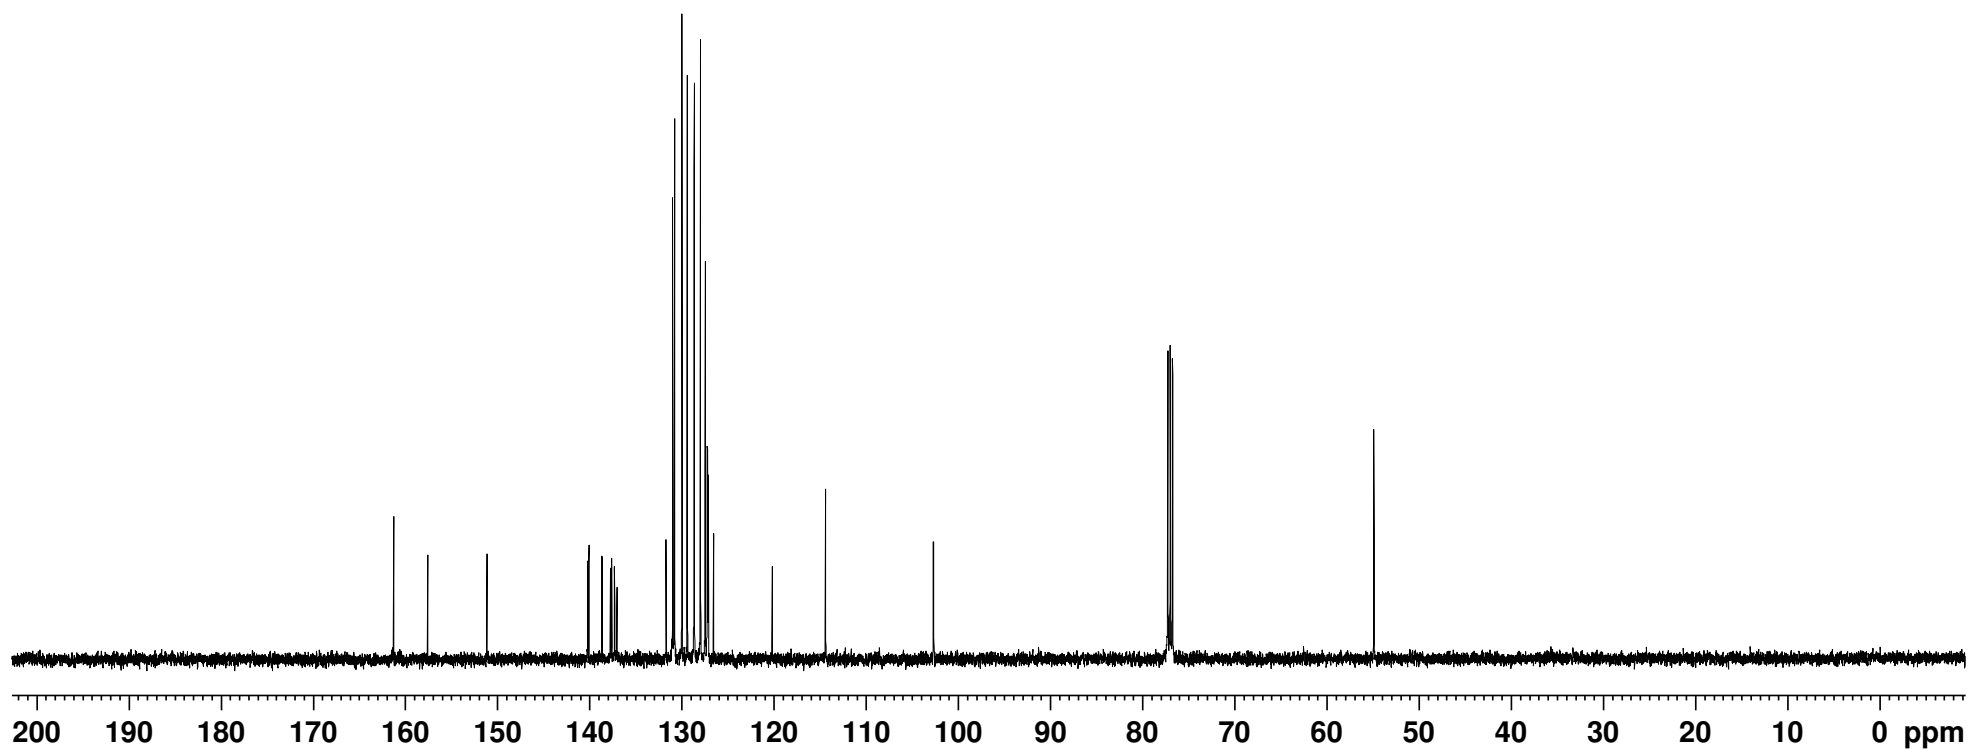

AS-216

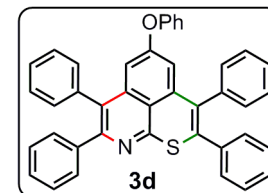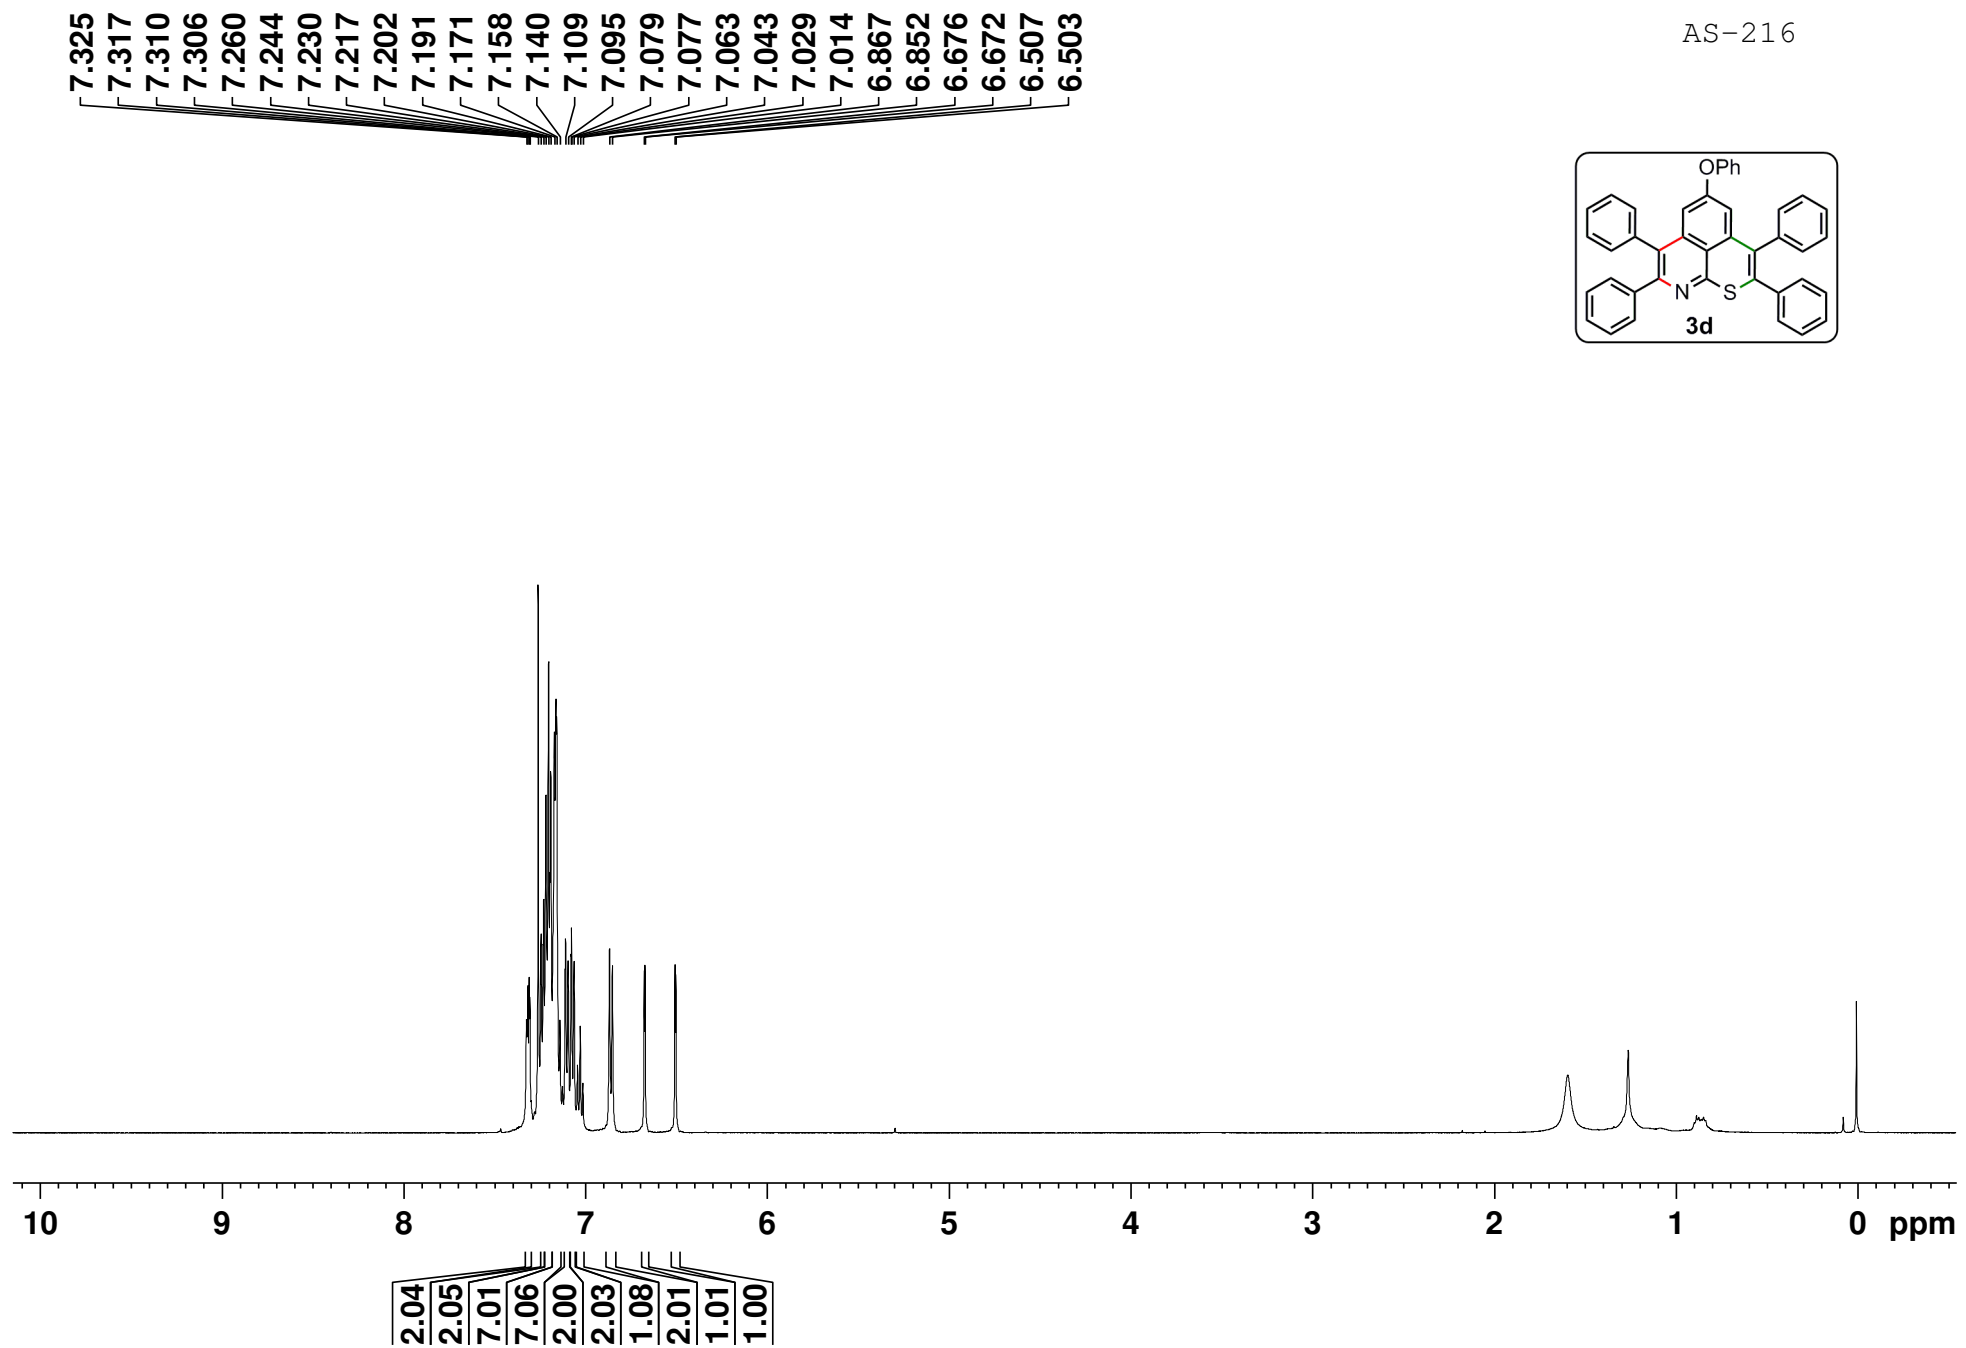

159.58  
157.94  
155.41  
151.12  
140.07  
139.98  
139.28  
137.43  
137.39  
137.27  
137.23  
131.82  
130.88  
130.69  
130.03  
129.57  
129.44  
128.65  
128.54  
128.11  
128.05  
127.53  
127.28  
127.17  
126.68  
123.94  
121.04  
119.37  
115.45  
109.32  
77.25  
77.00  
76.75

AS-216

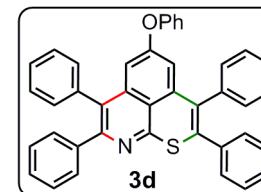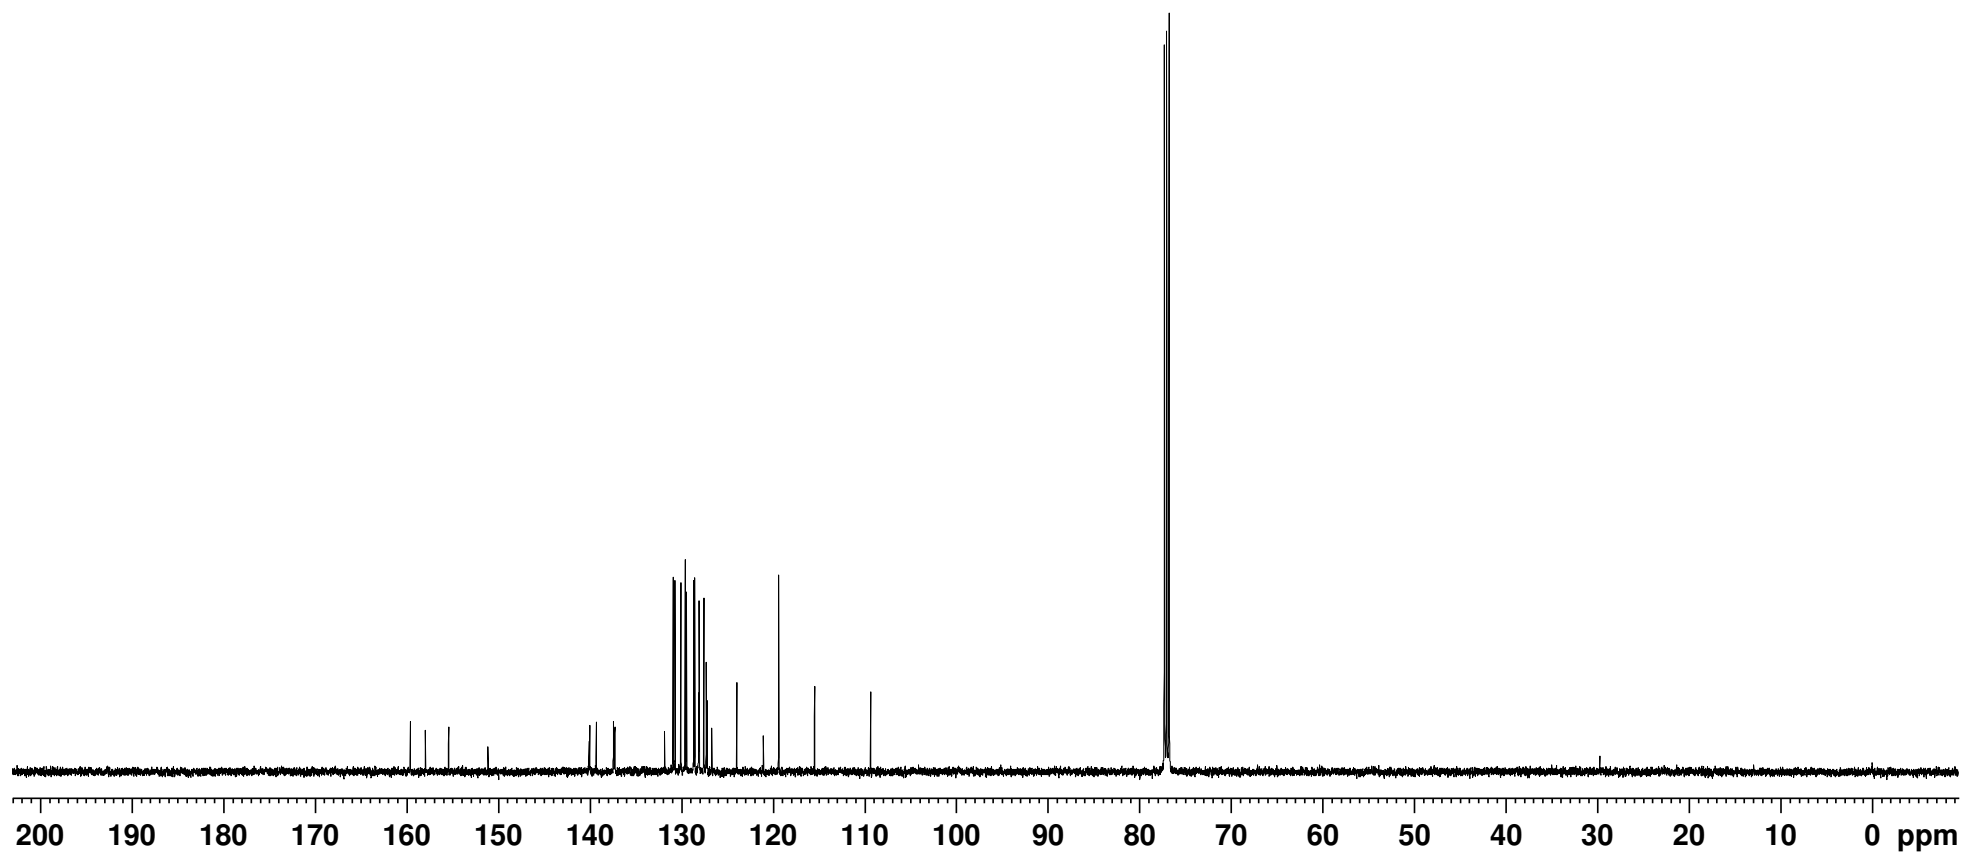

AS-324

7.346  
7.331  
7.327  
7.322  
7.313  
7.307  
7.303  
7.283  
7.276  
7.273  
7.266  
7.260  
7.251  
7.218  
7.203  
7.198  
7.189  
7.186  
7.169  
7.163  
7.158  
7.154  
7.142  
7.139  
7.126  
7.123  
7.106  
7.092  
6.636  
6.631  
6.501  
6.496  
4.808

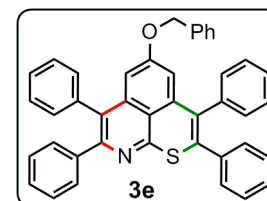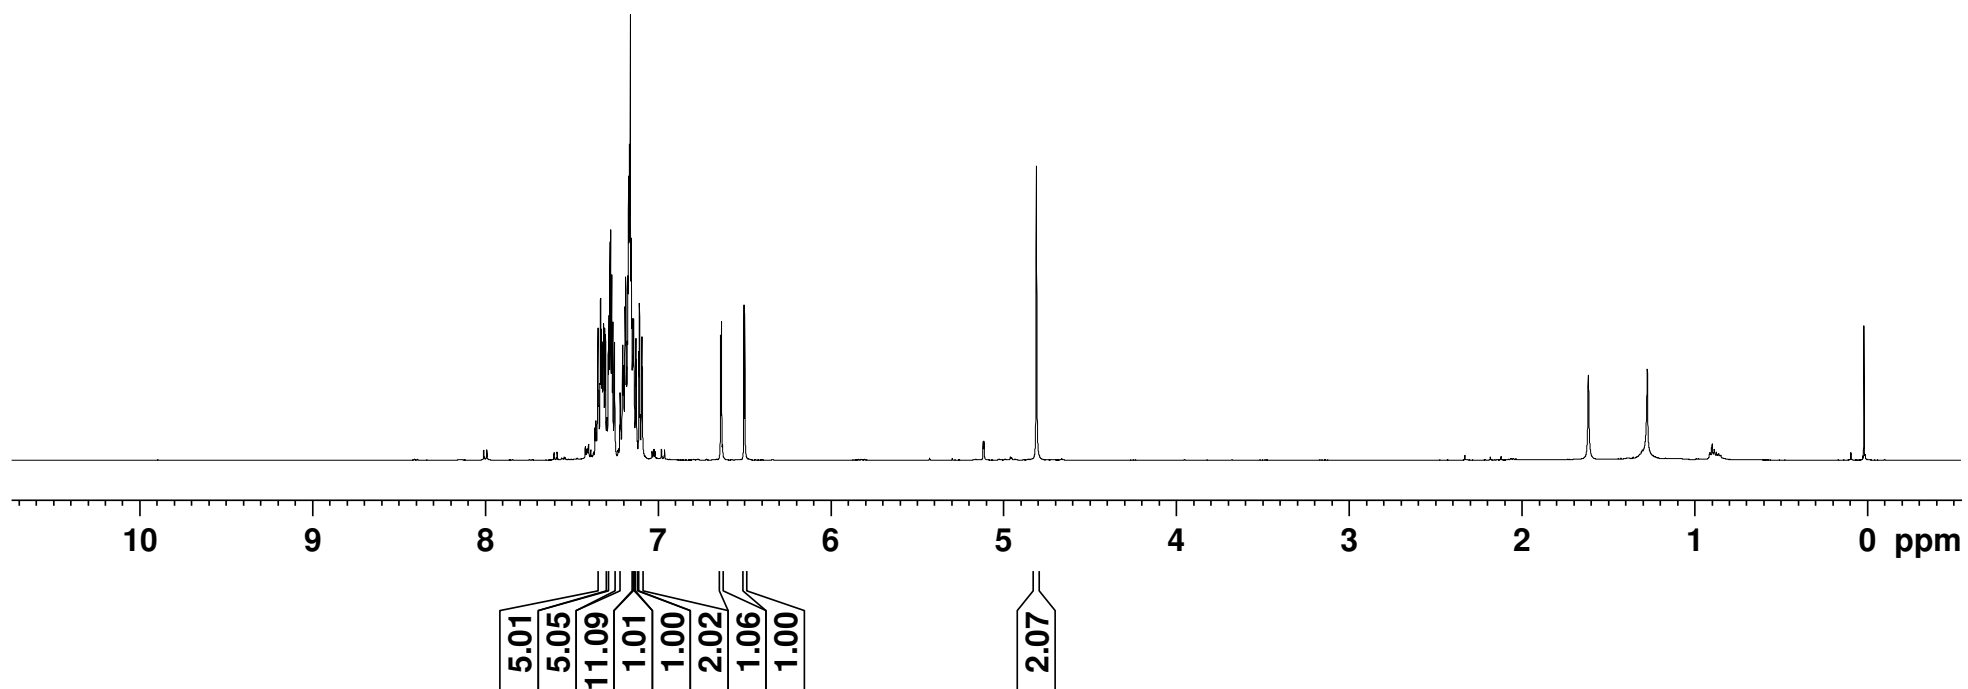



AS-324

160.21  
157.61  
151.04  
140.18  
139.94  
138.70  
137.68  
137.57  
137.30  
137.01  
135.90  
131.74  
130.99  
130.80  
129.99  
129.42  
128.70  
128.69  
128.52  
128.03  
127.98  
127.69  
127.49  
127.25  
127.15  
127.13  
126.51  
120.15  
114.70  
104.35  
77.26  
77.00  
76.75  
69.69

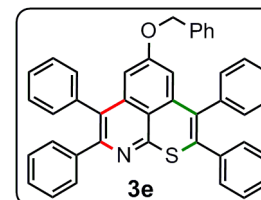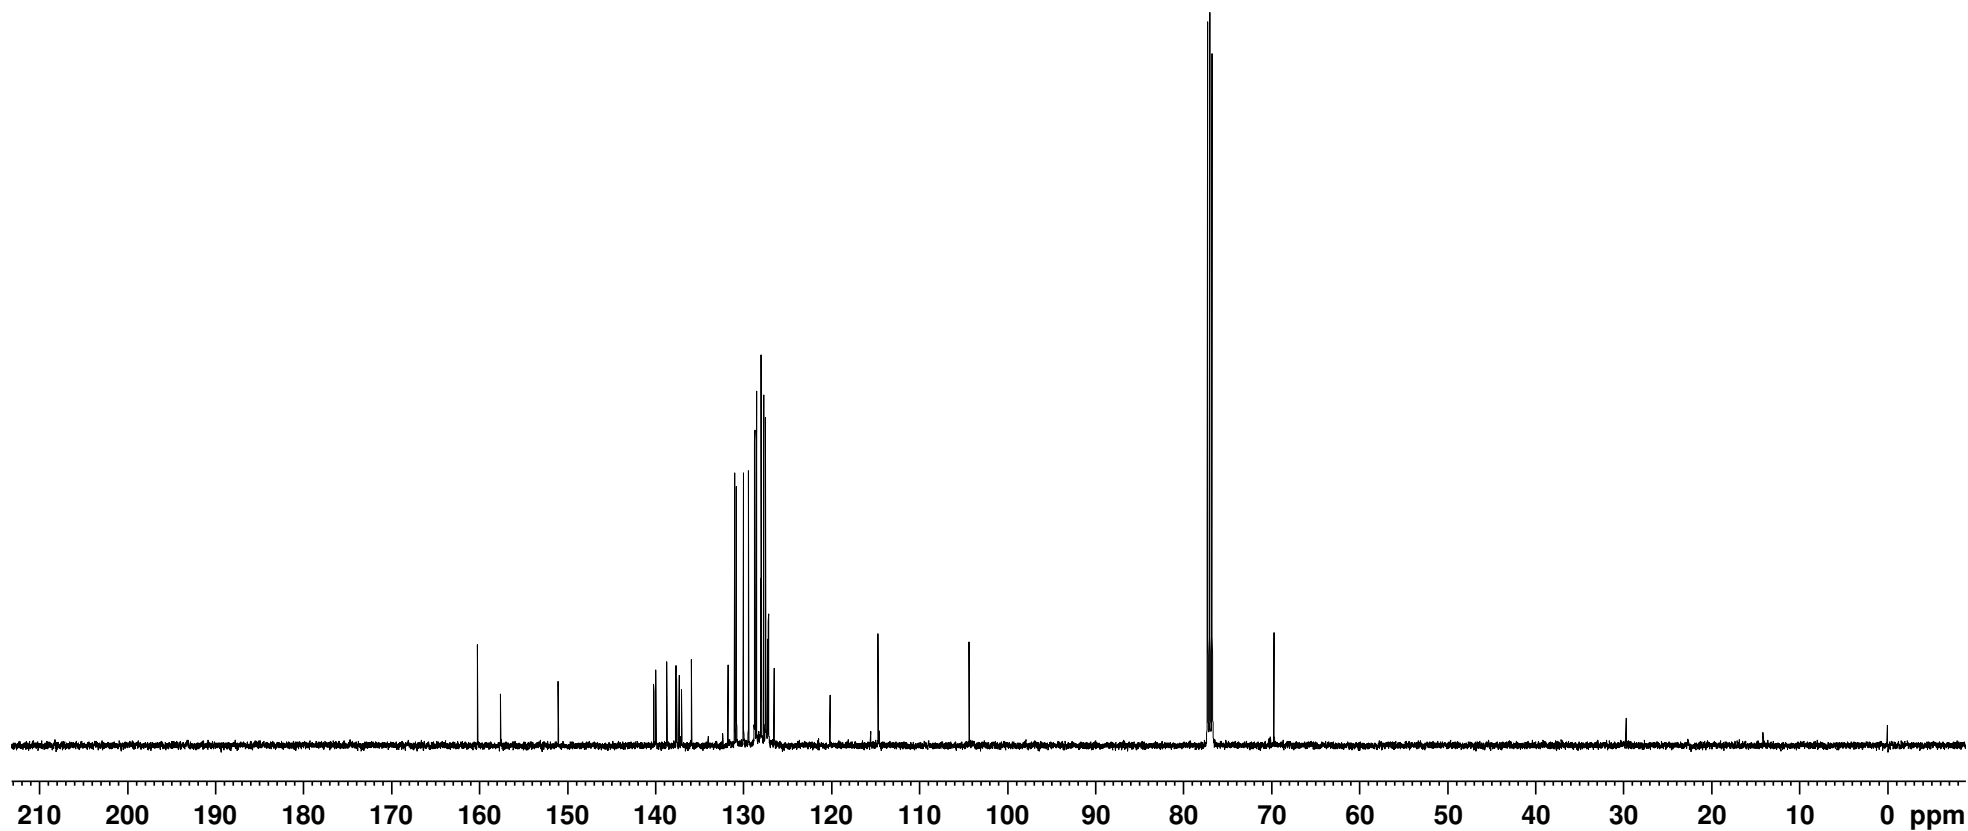

AS-565

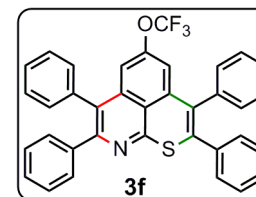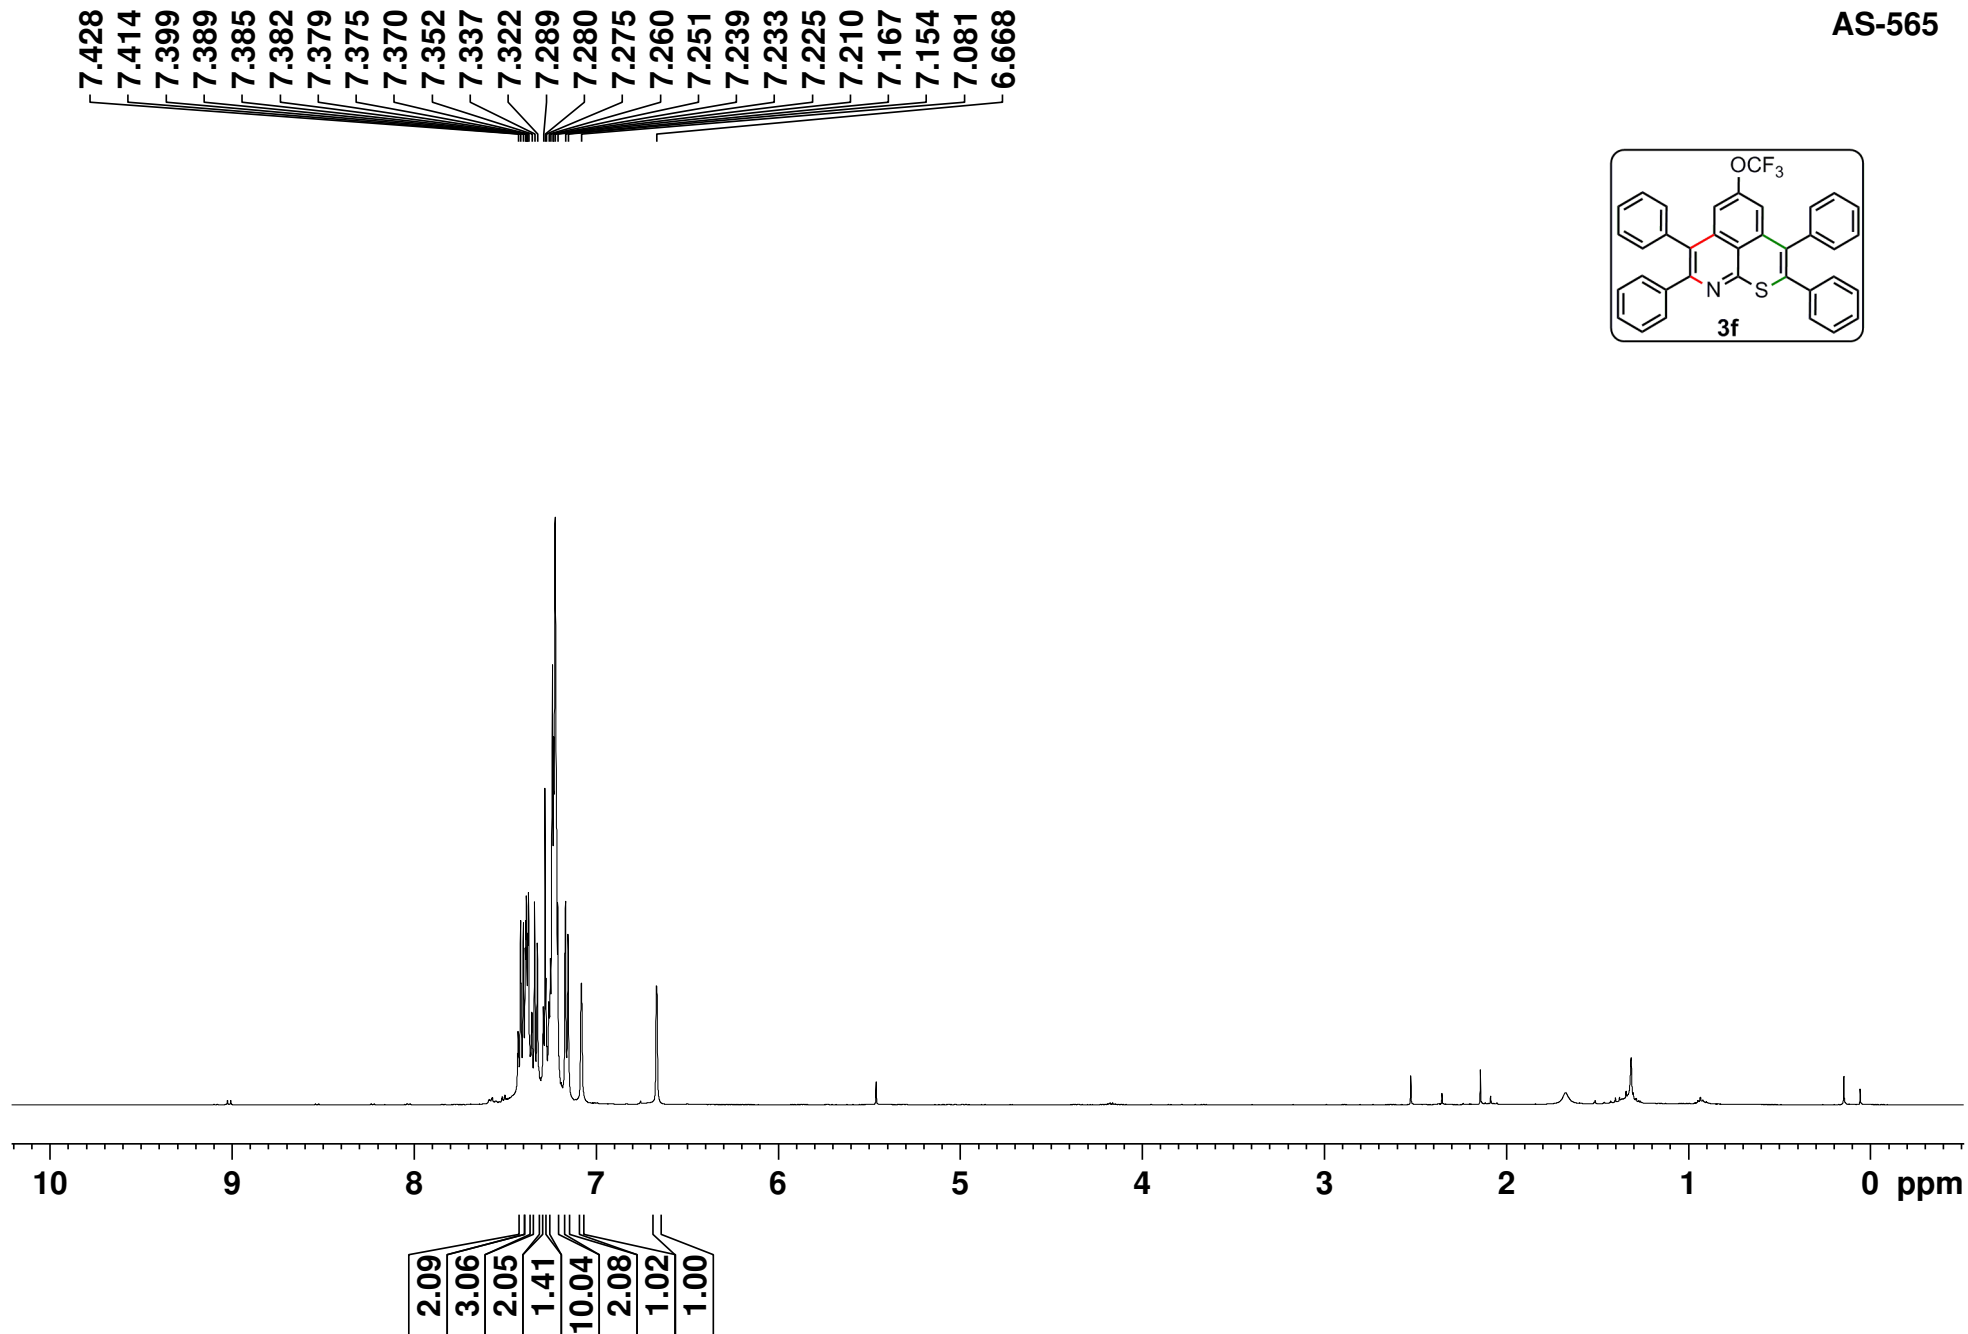

AS-565

158.27  
151.64  
151.08  
139.76  
139.63  
139.56  
138.49  
136.93  
136.87  
136.73  
131.53  
130.84  
130.62  
130.00  
129.31  
128.88  
128.85  
128.30  
128.11  
127.63  
127.60  
127.51  
127.07  
122.47  
115.85  
112.85  
77.25  
77.00  
76.75

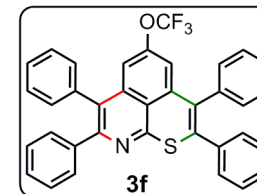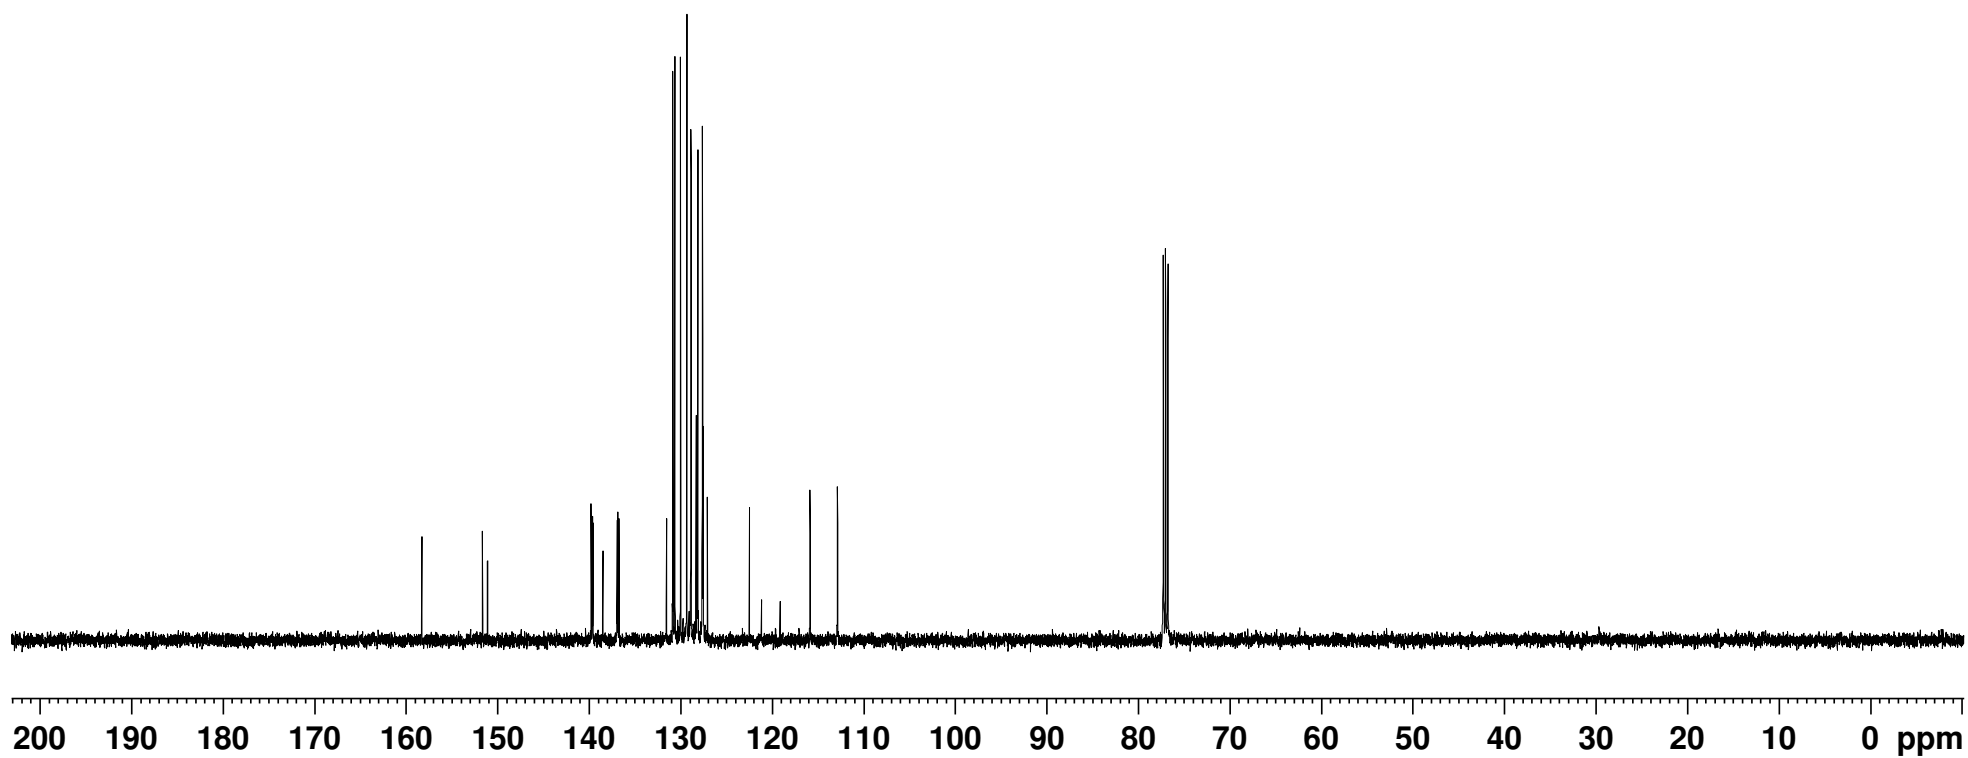

AS-565

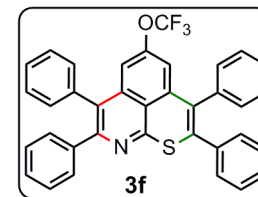

-57.50

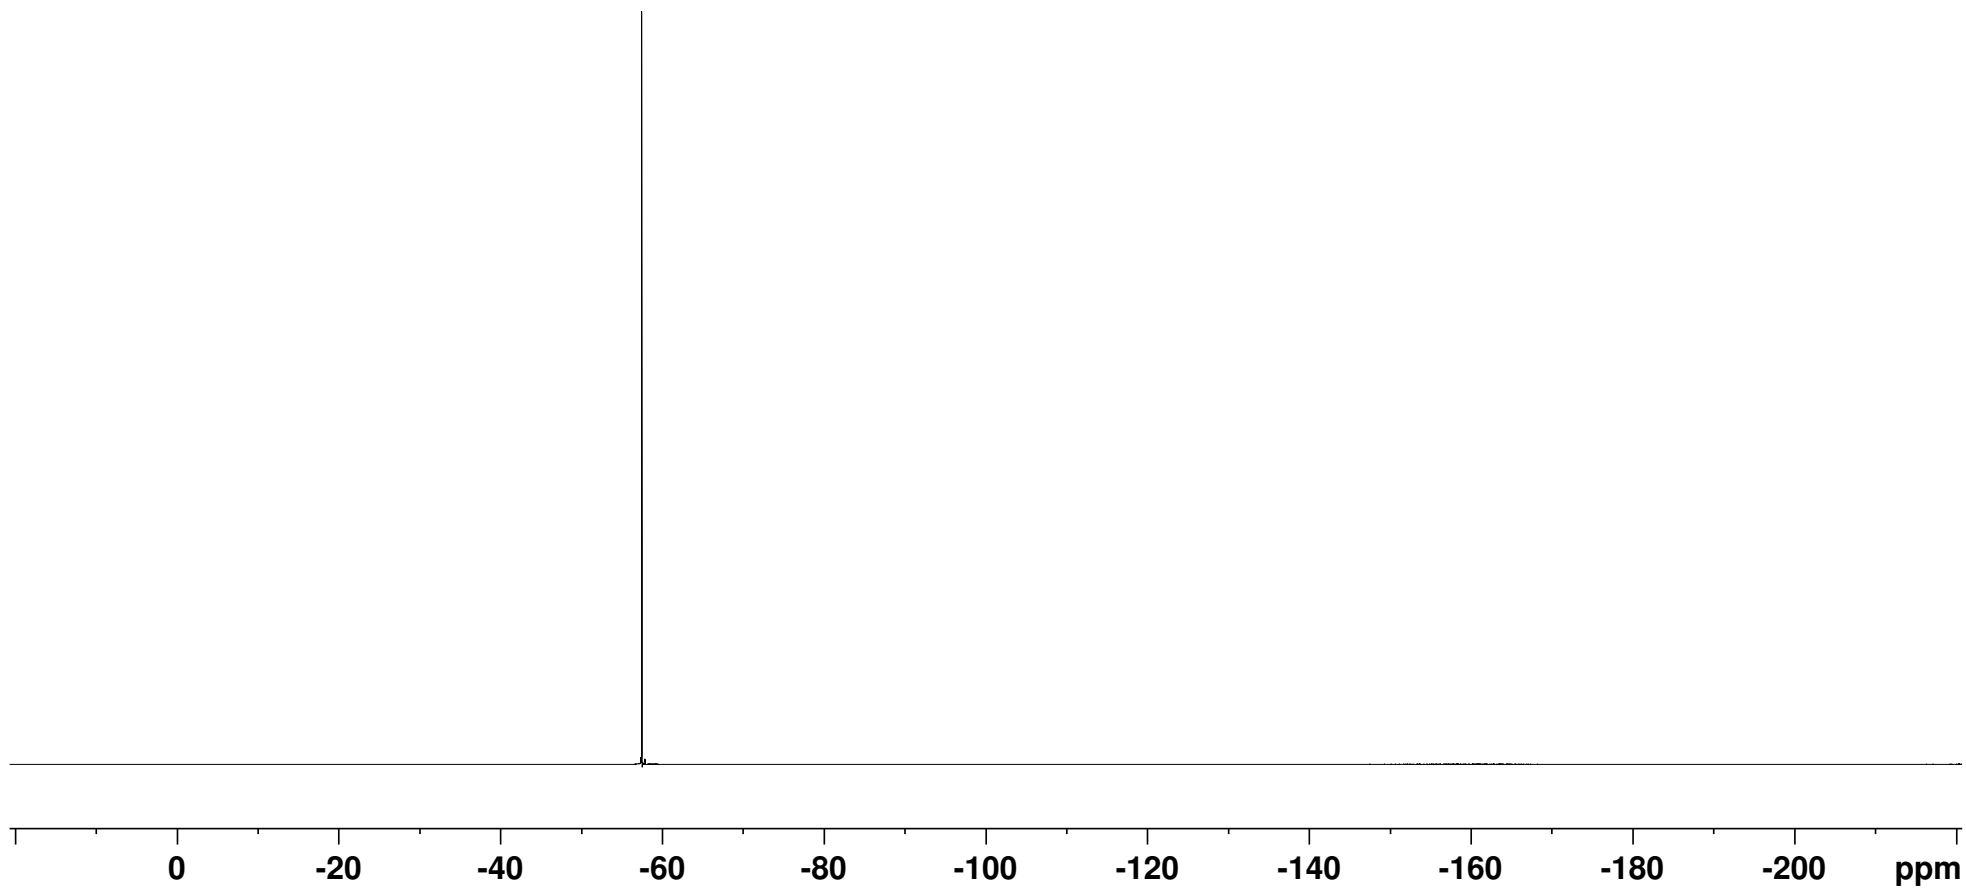

7.405  
7.392  
7.389  
7.379  
7.377  
7.373  
7.369  
7.362  
7.359  
7.356  
7.350  
7.345  
7.329  
7.313  
7.298  
7.292  
7.281  
7.279  
7.277  
7.260  
7.257  
7.253  
7.250  
7.245  
7.241  
7.236  
7.218  
7.214  
7.207  
7.204  
7.197  
7.193  
7.172  
7.158  
6.841  
6.837  
6.829  
6.824

AS- 510

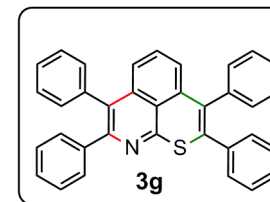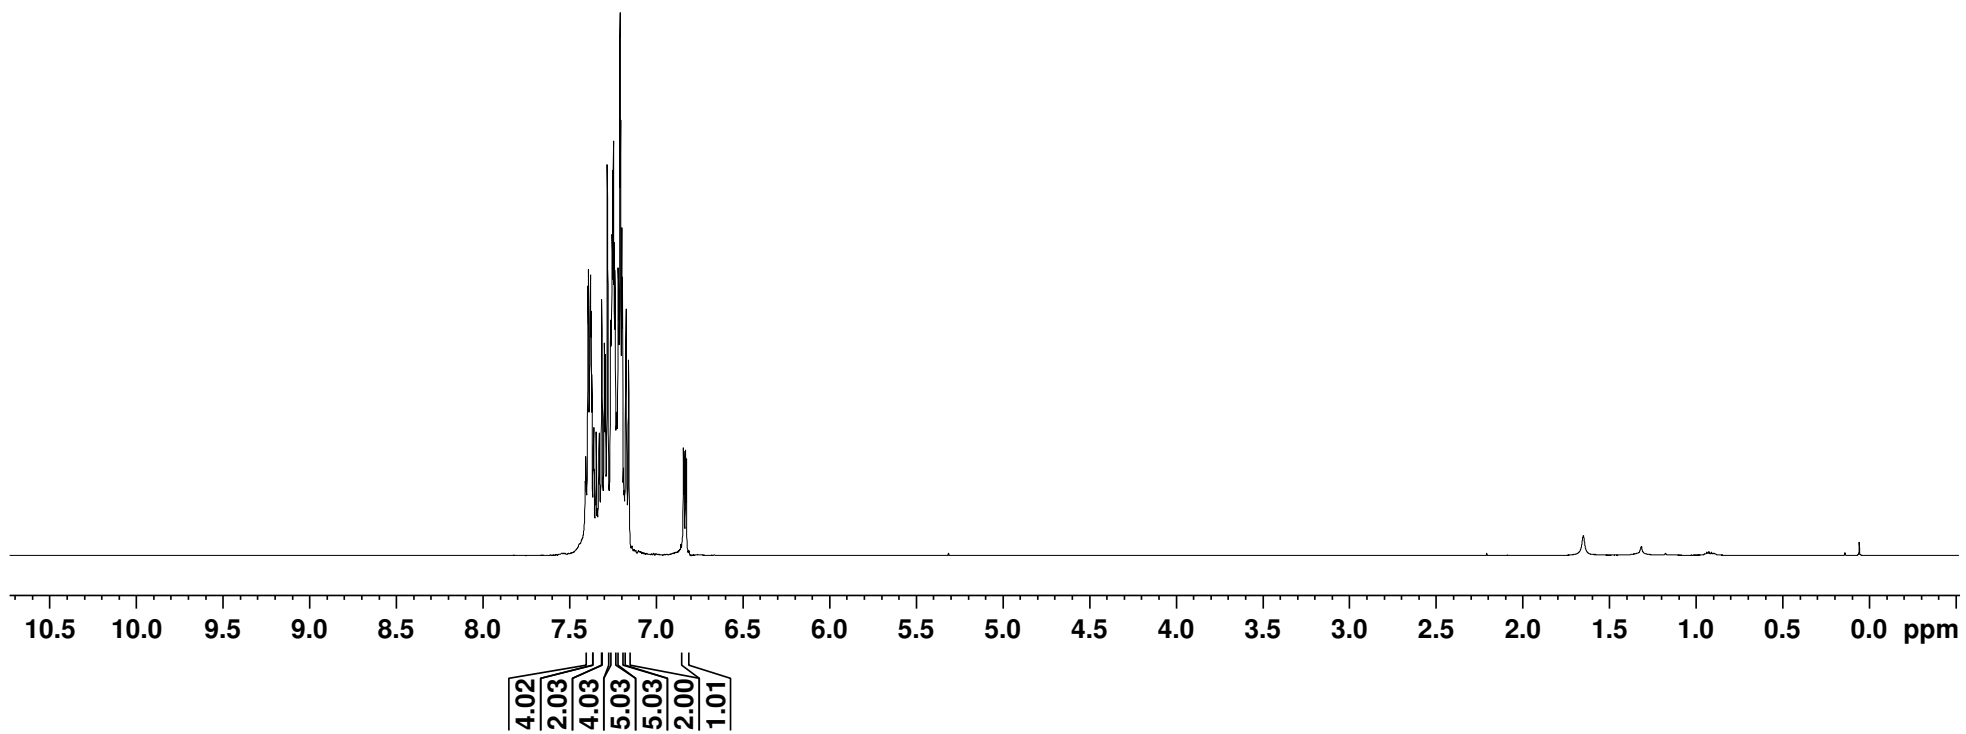

Arjit-AS- 510

158.48  
150.53  
140.08  
137.84  
137.76  
137.51  
137.35  
136.58  
136.04  
132.09  
131.10  
130.99  
130.87  
130.06  
129.47  
128.63  
128.02  
127.98  
127.51  
127.24  
127.20  
127.06  
124.18  
123.28  
123.26  
77.25  
77.00  
76.75

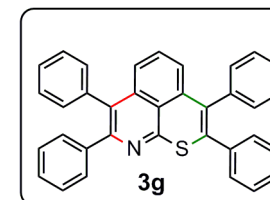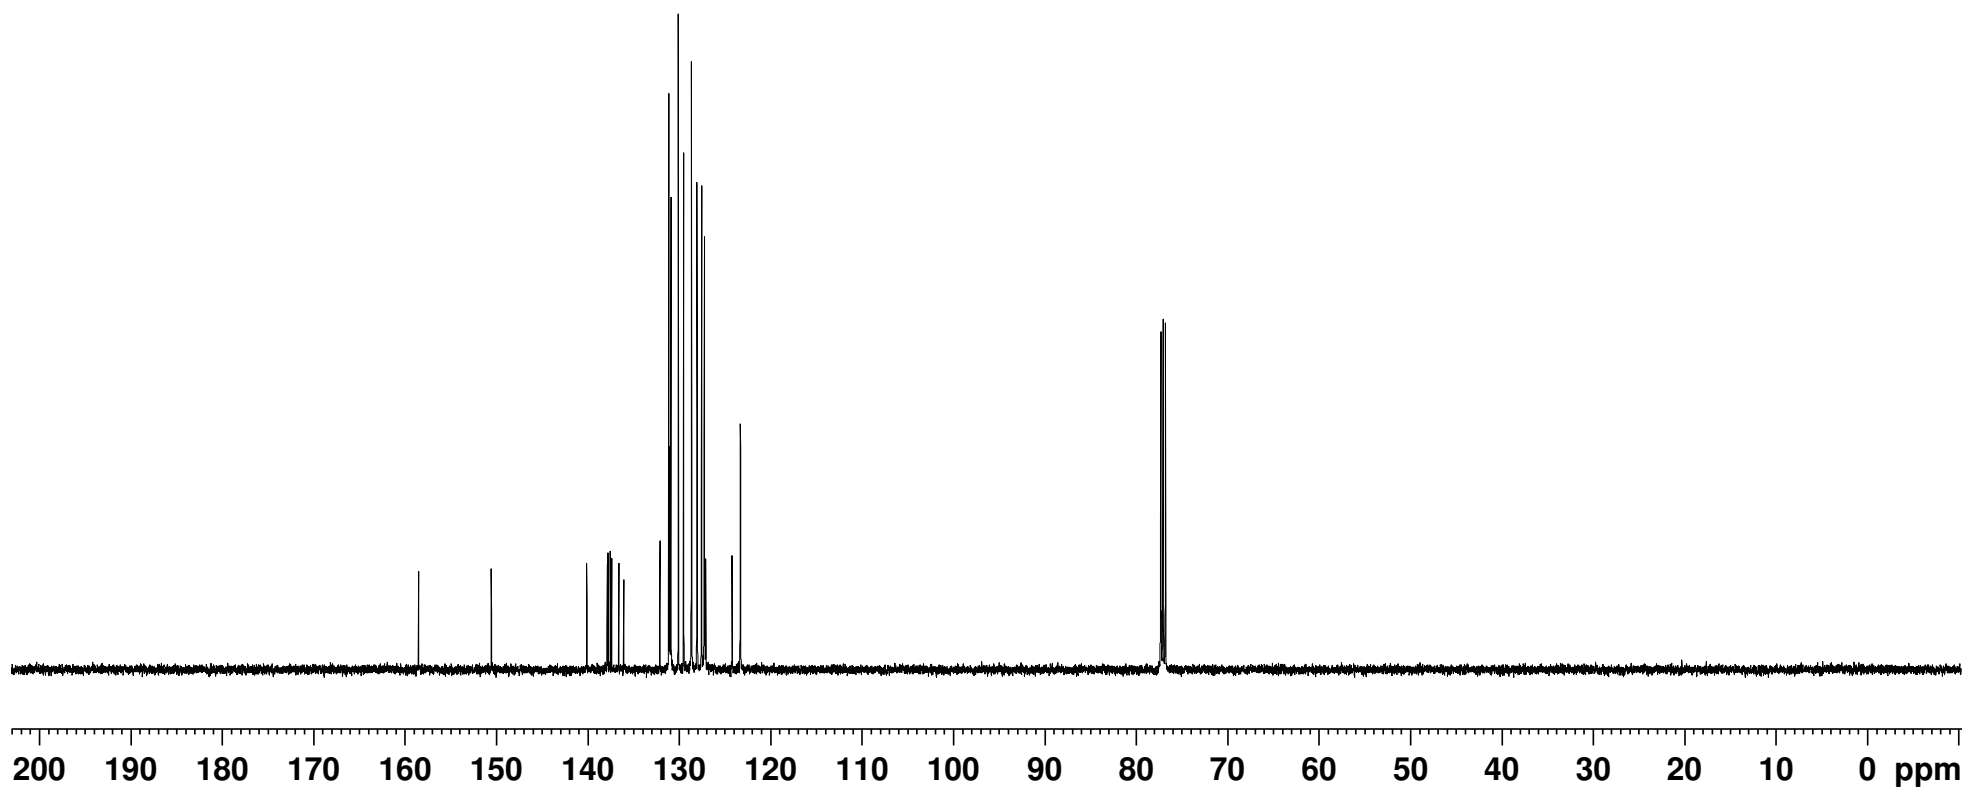

AS-322

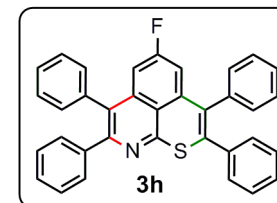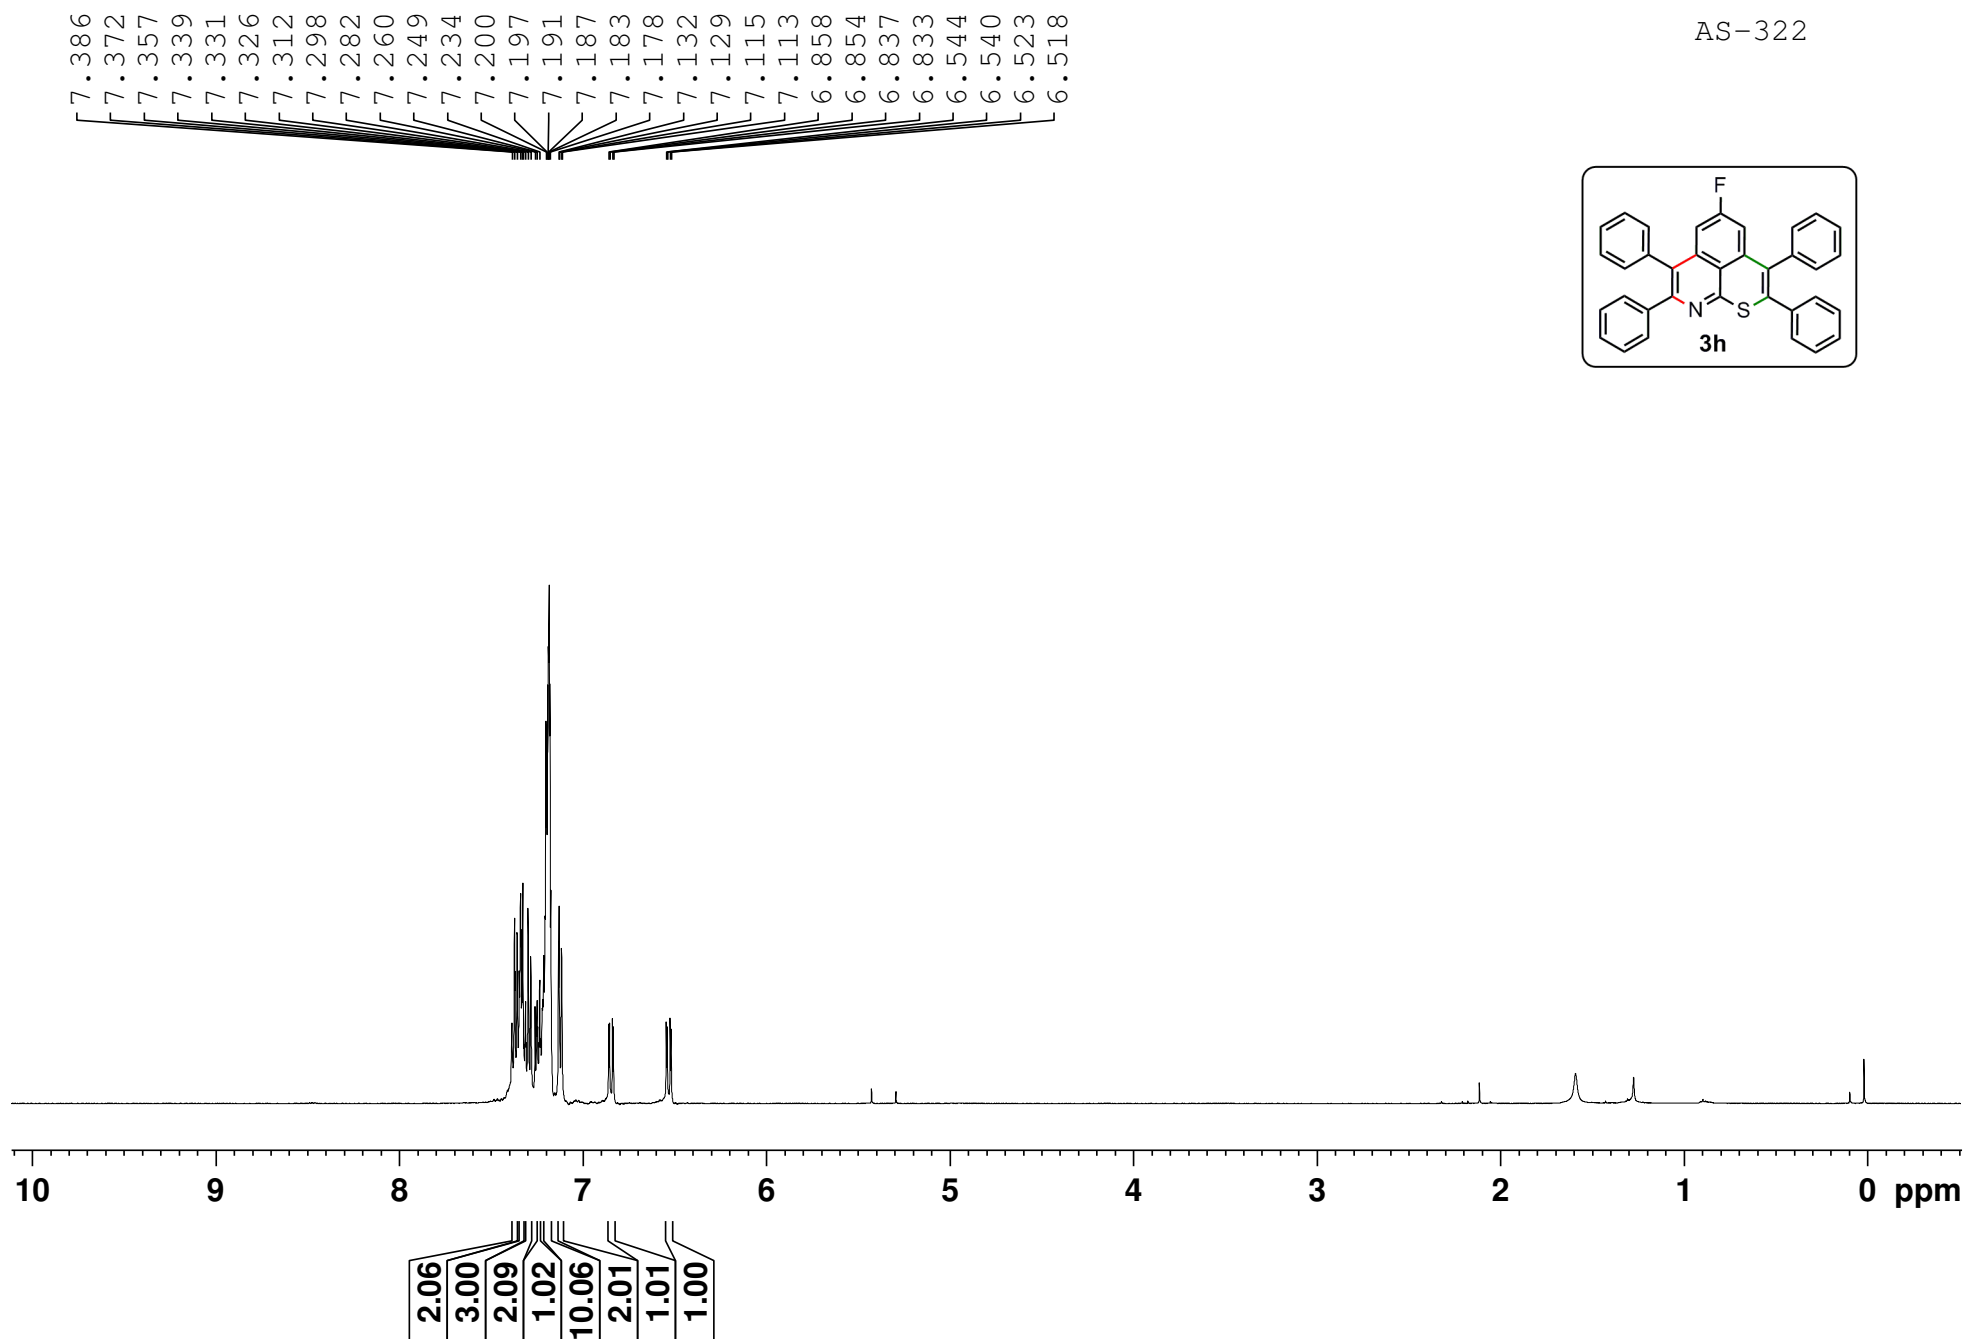

AS-322

165.09  
163.11  
158.22  
151.45  
140.42  
140.34  
140.24  
139.81  
138.37  
137.22  
137.14  
136.98  
131.66  
131.64  
130.93  
130.74  
130.03  
129.38  
128.87  
128.83  
128.26  
128.10  
127.57  
127.51  
127.44  
126.97  
126.93  
121.67  
112.39  
112.17  
107.38  
107.19  
77.25  
77.00  
76.75

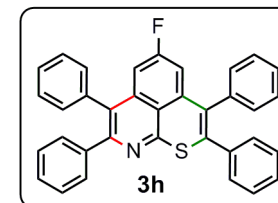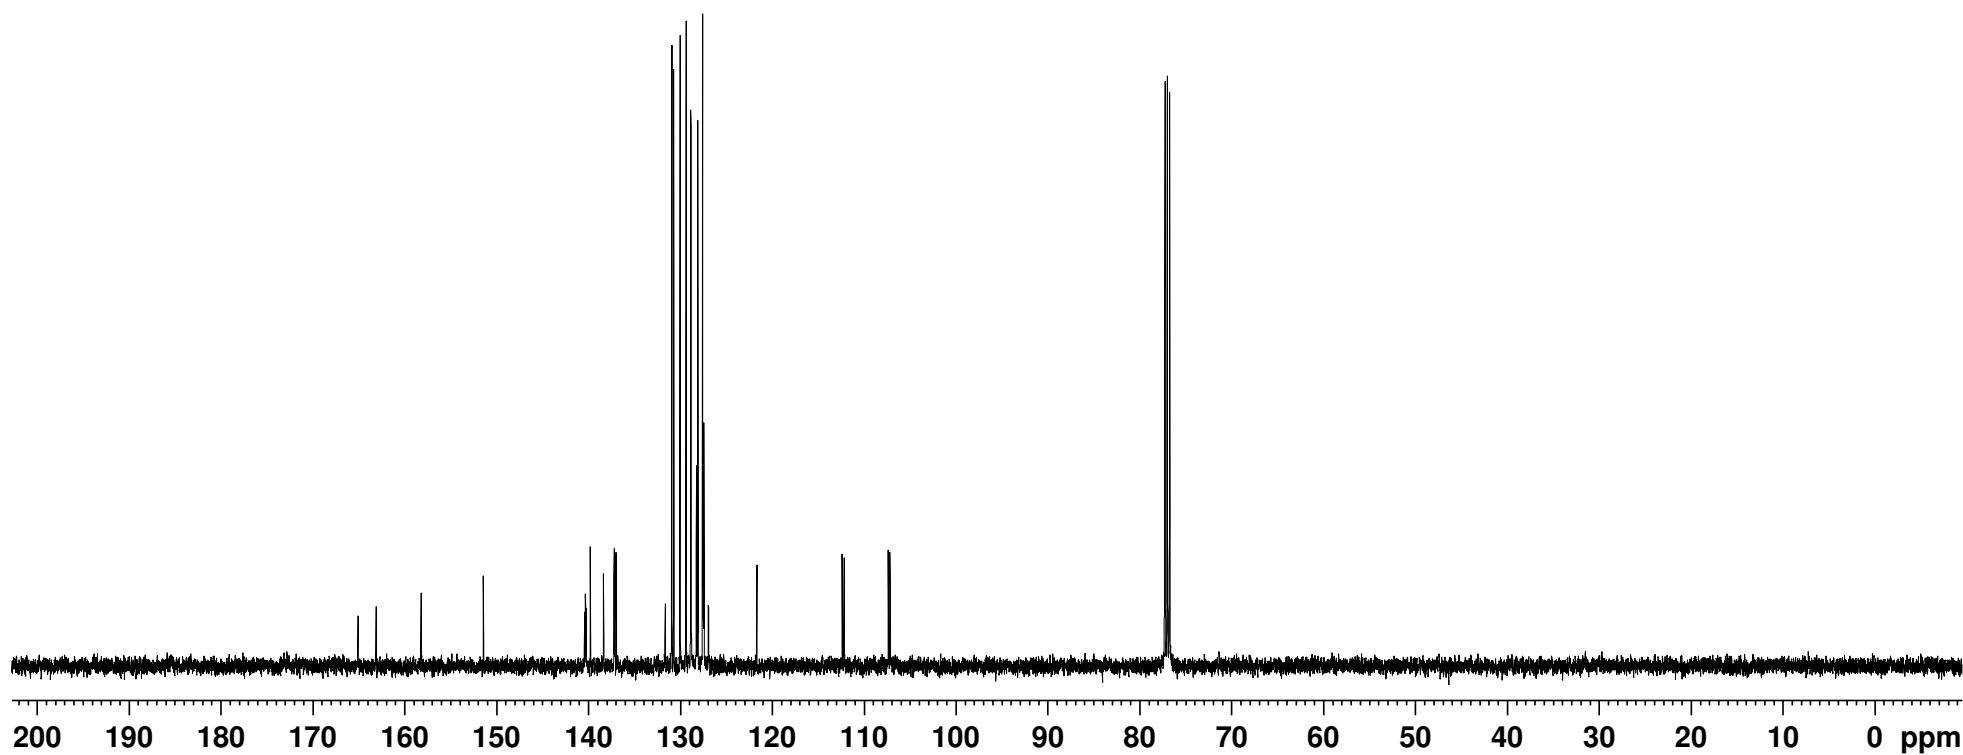



AS-322

— -105.21

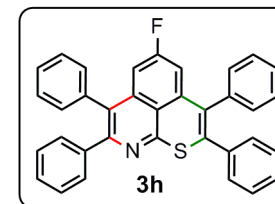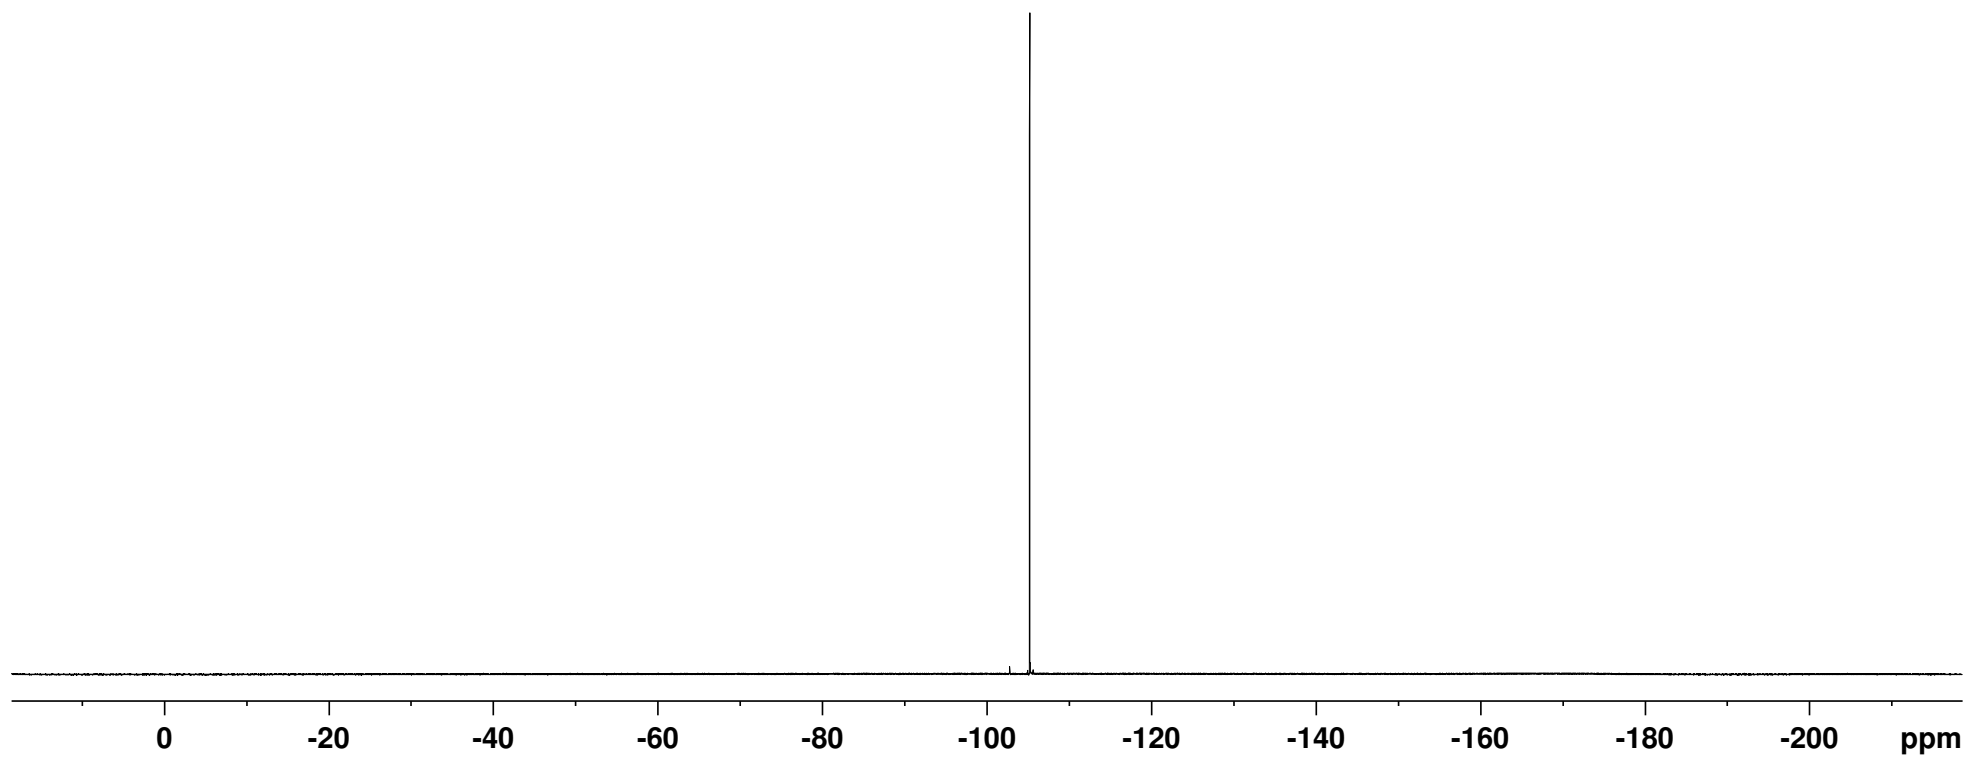

Arjit-AS-217

7.395  
7.381  
7.366  
7.352  
7.338  
7.331  
7.324  
7.319  
7.302  
7.287  
7.260  
7.253  
7.239  
7.204  
7.200  
7.192  
7.186  
7.179  
7.128  
7.114  
6.743  
6.739

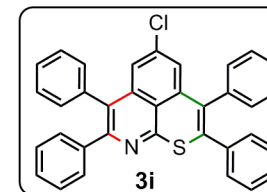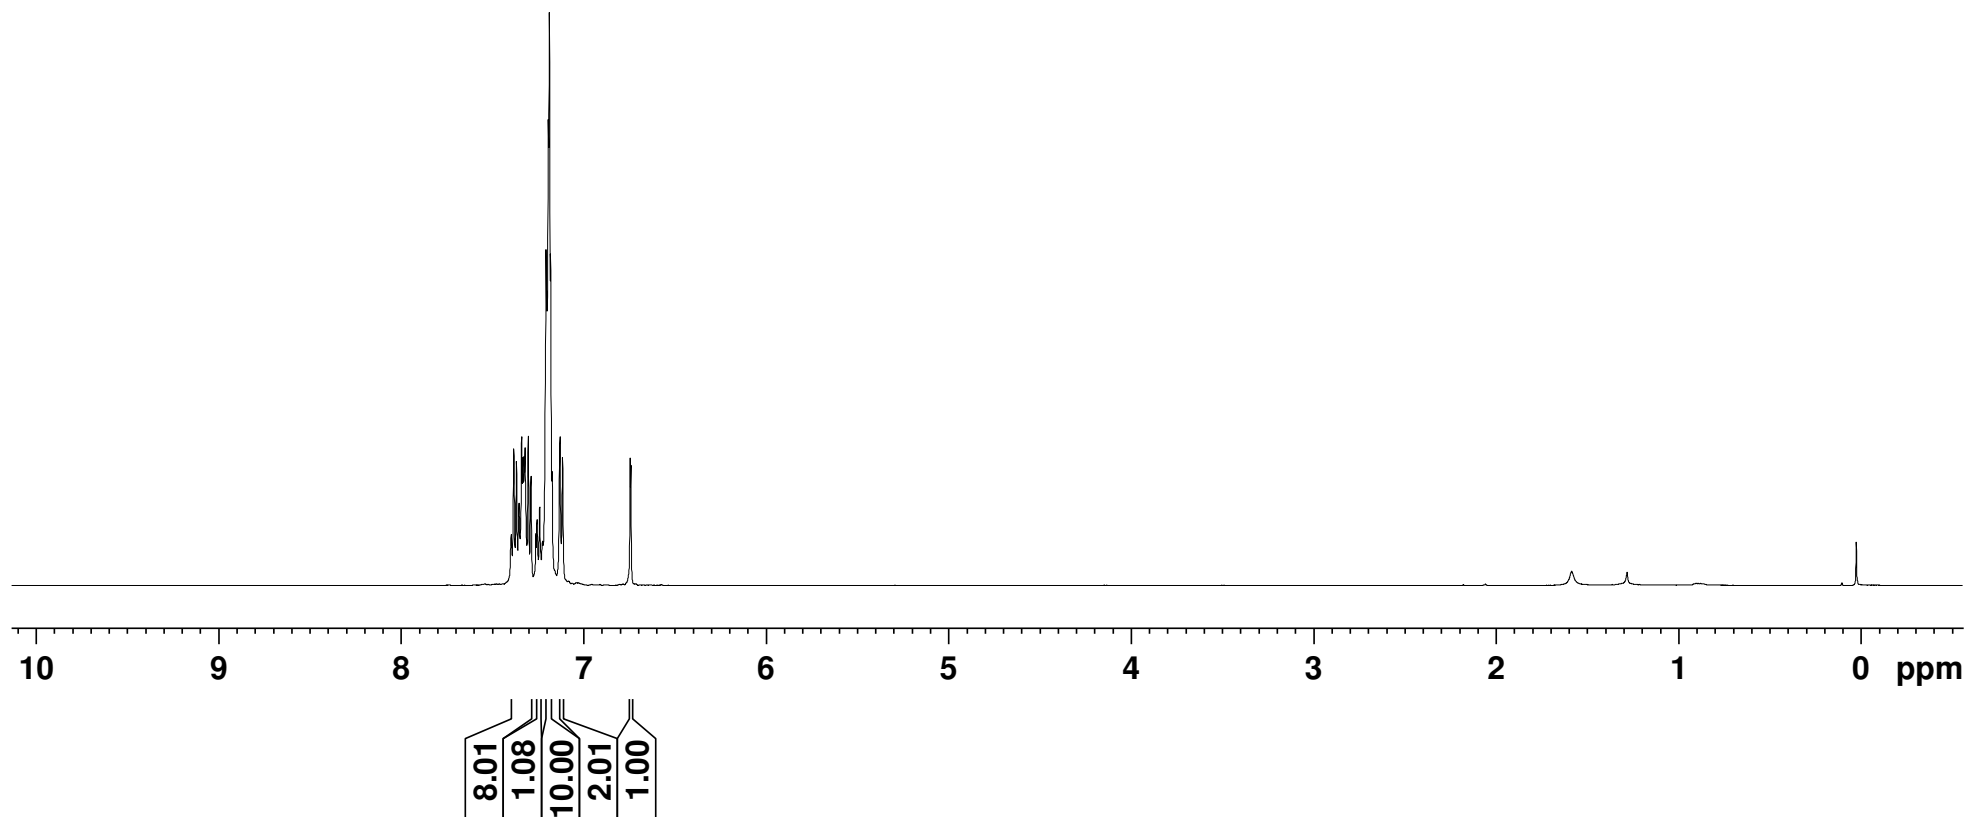

158.35  
151.64  
139.75  
139.12  
138.71  
138.27  
137.94  
137.05  
137.00  
136.86  
131.37  
130.99  
130.74  
130.01  
129.36  
128.86  
128.84  
128.23  
128.09  
127.57  
127.45  
126.36  
123.35  
122.57  
121.99

77.25  
77.00  
76.74

AS-217

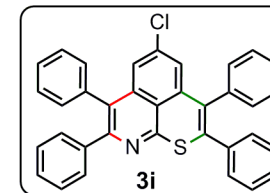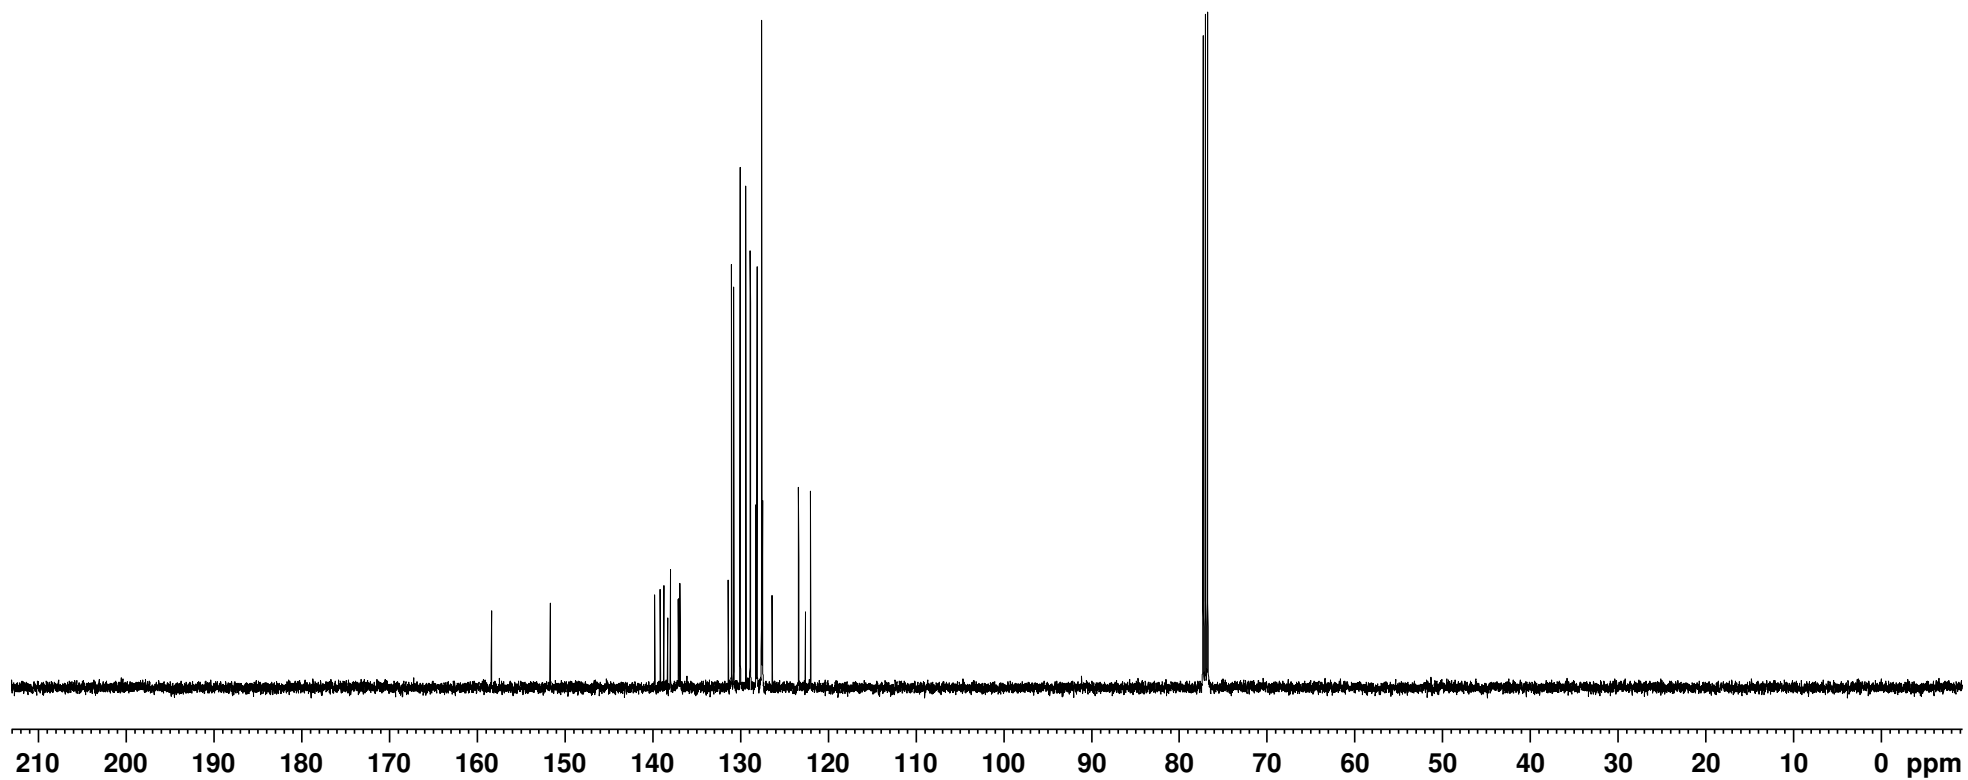

7.343  
7.339  
7.326  
7.311  
7.299  
7.285  
7.279  
7.272  
7.267  
7.260  
7.245  
7.230  
7.198  
7.183  
7.168  
7.147  
7.140  
7.134  
7.128  
7.122  
7.113  
7.072  
7.058  
6.841  
6.838

AS-319

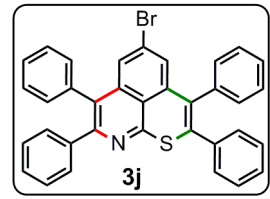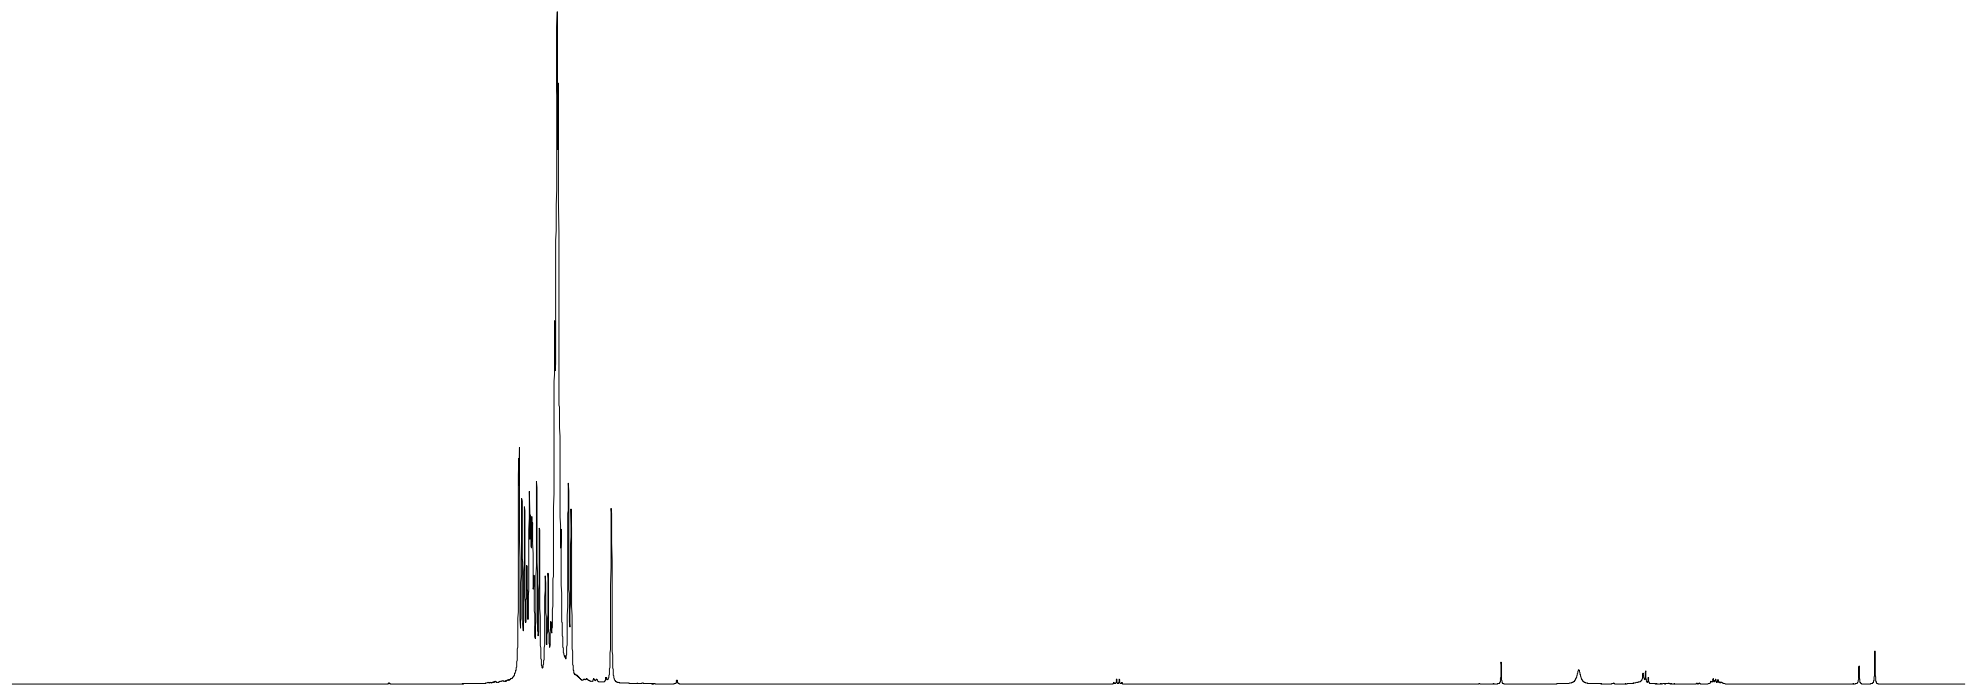

10 9 8 7 6 5 4 3 2 1 0 ppm

1.09  
2.04  
2.00  
2.09  
1.08  
11.09  
2.07  
1.00

AS-319

158.43  
151.55  
139.65  
139.15  
138.53  
138.16  
136.90  
136.70  
131.16  
130.93  
130.68  
129.97  
129.30  
128.84  
128.81  
128.20  
128.05  
127.55  
127.43  
126.79  
126.12  
125.93  
125.18  
122.68  
  
77.25  
77.00  
76.75

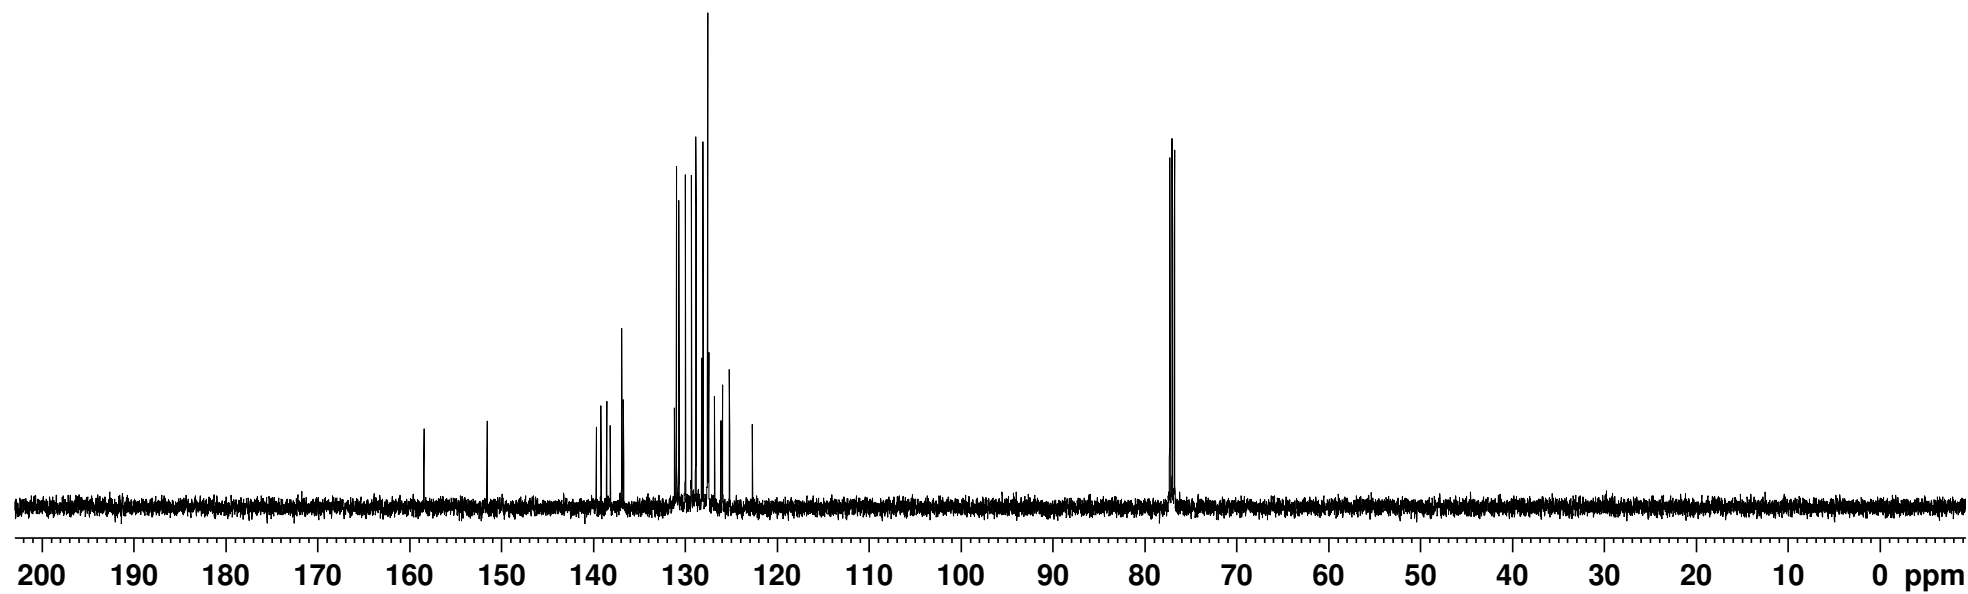

Majji-MJ-17-I

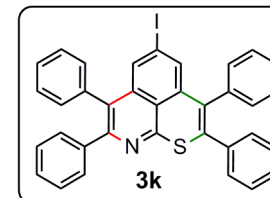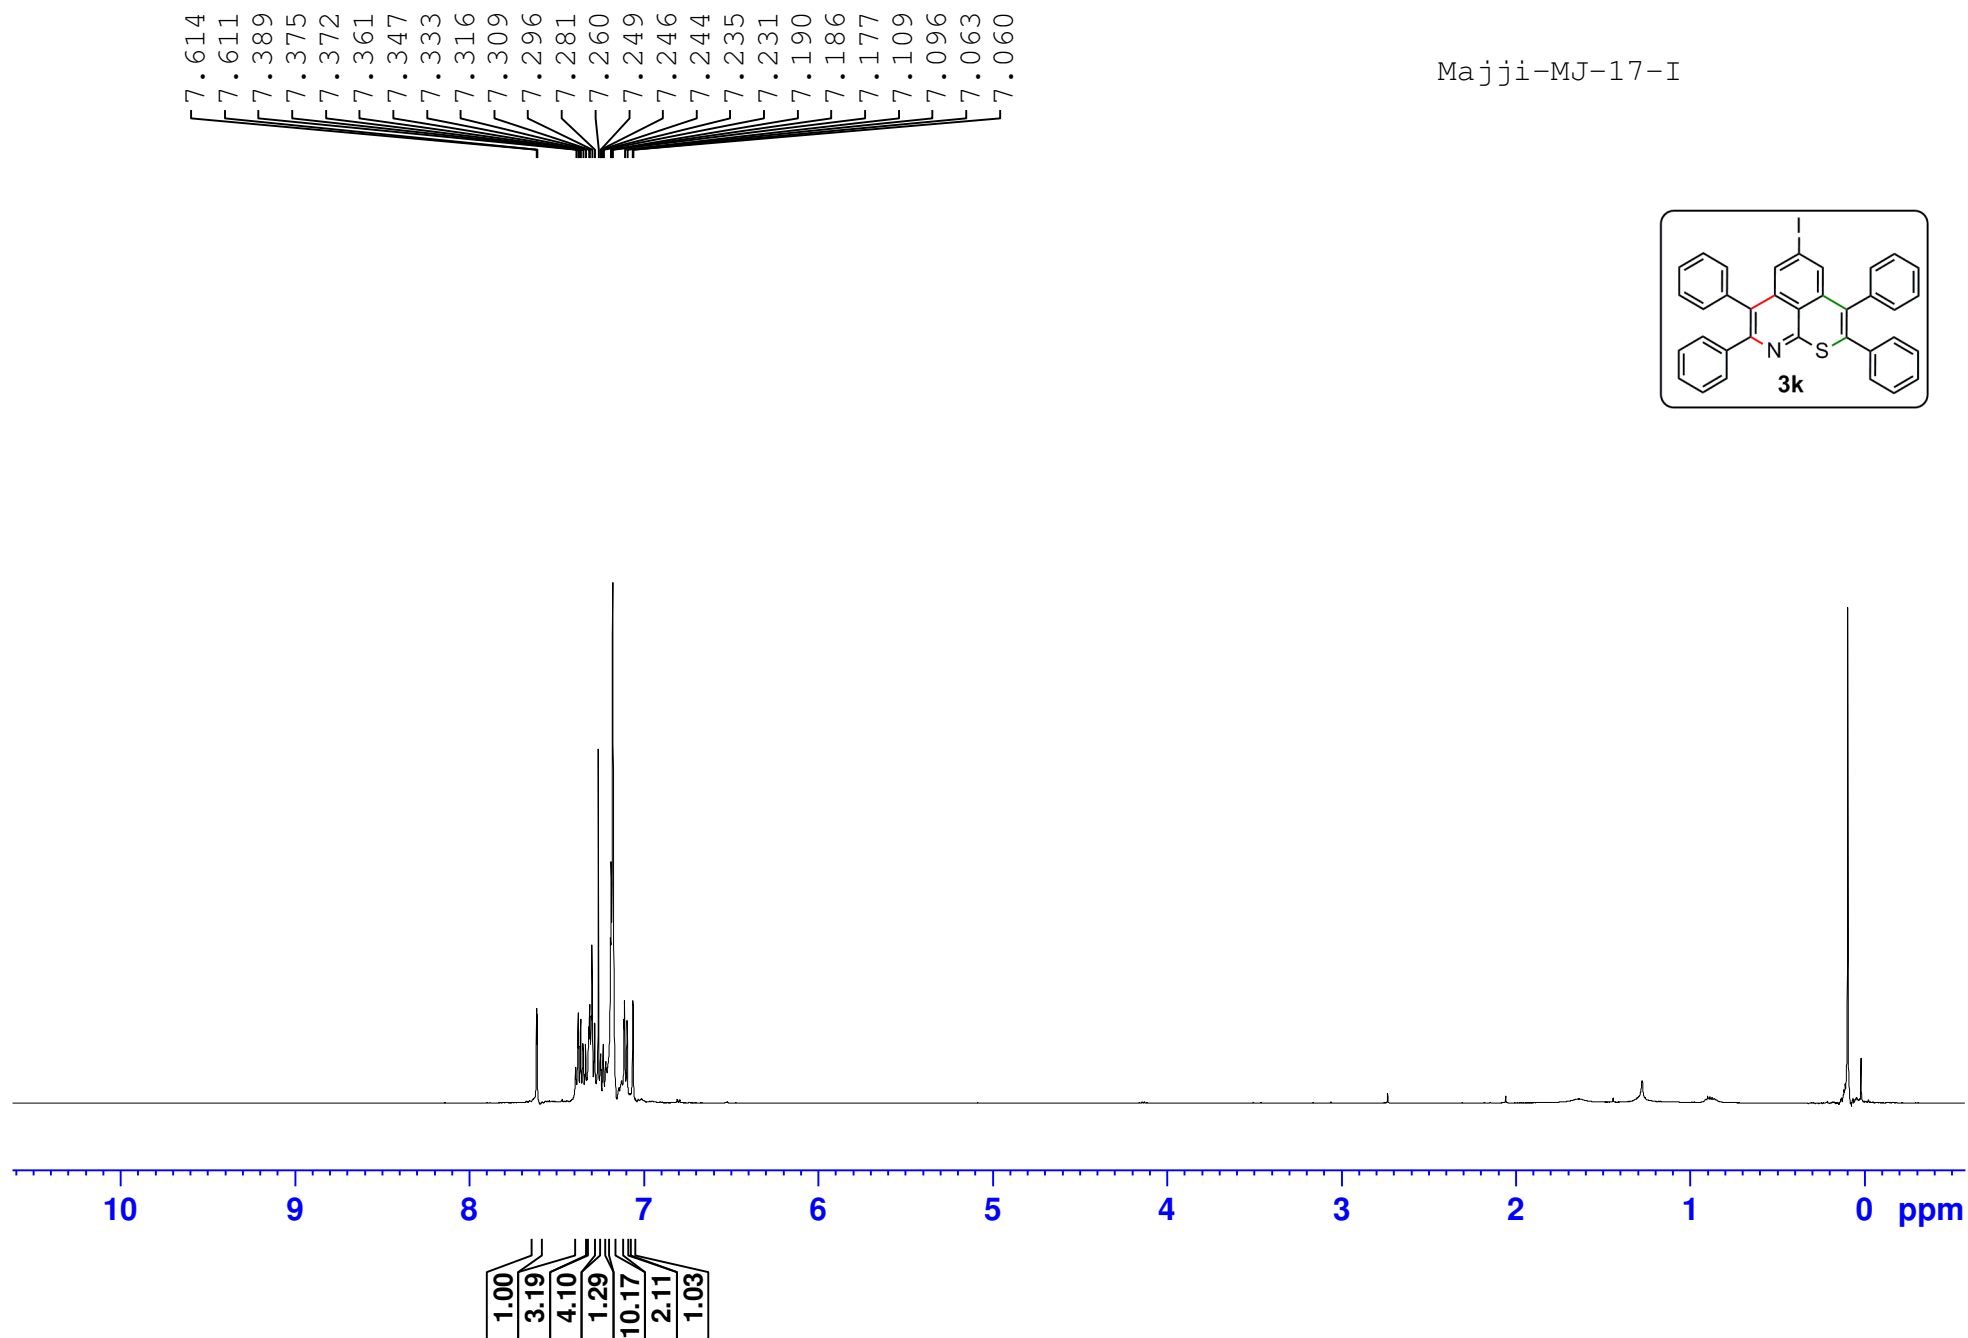

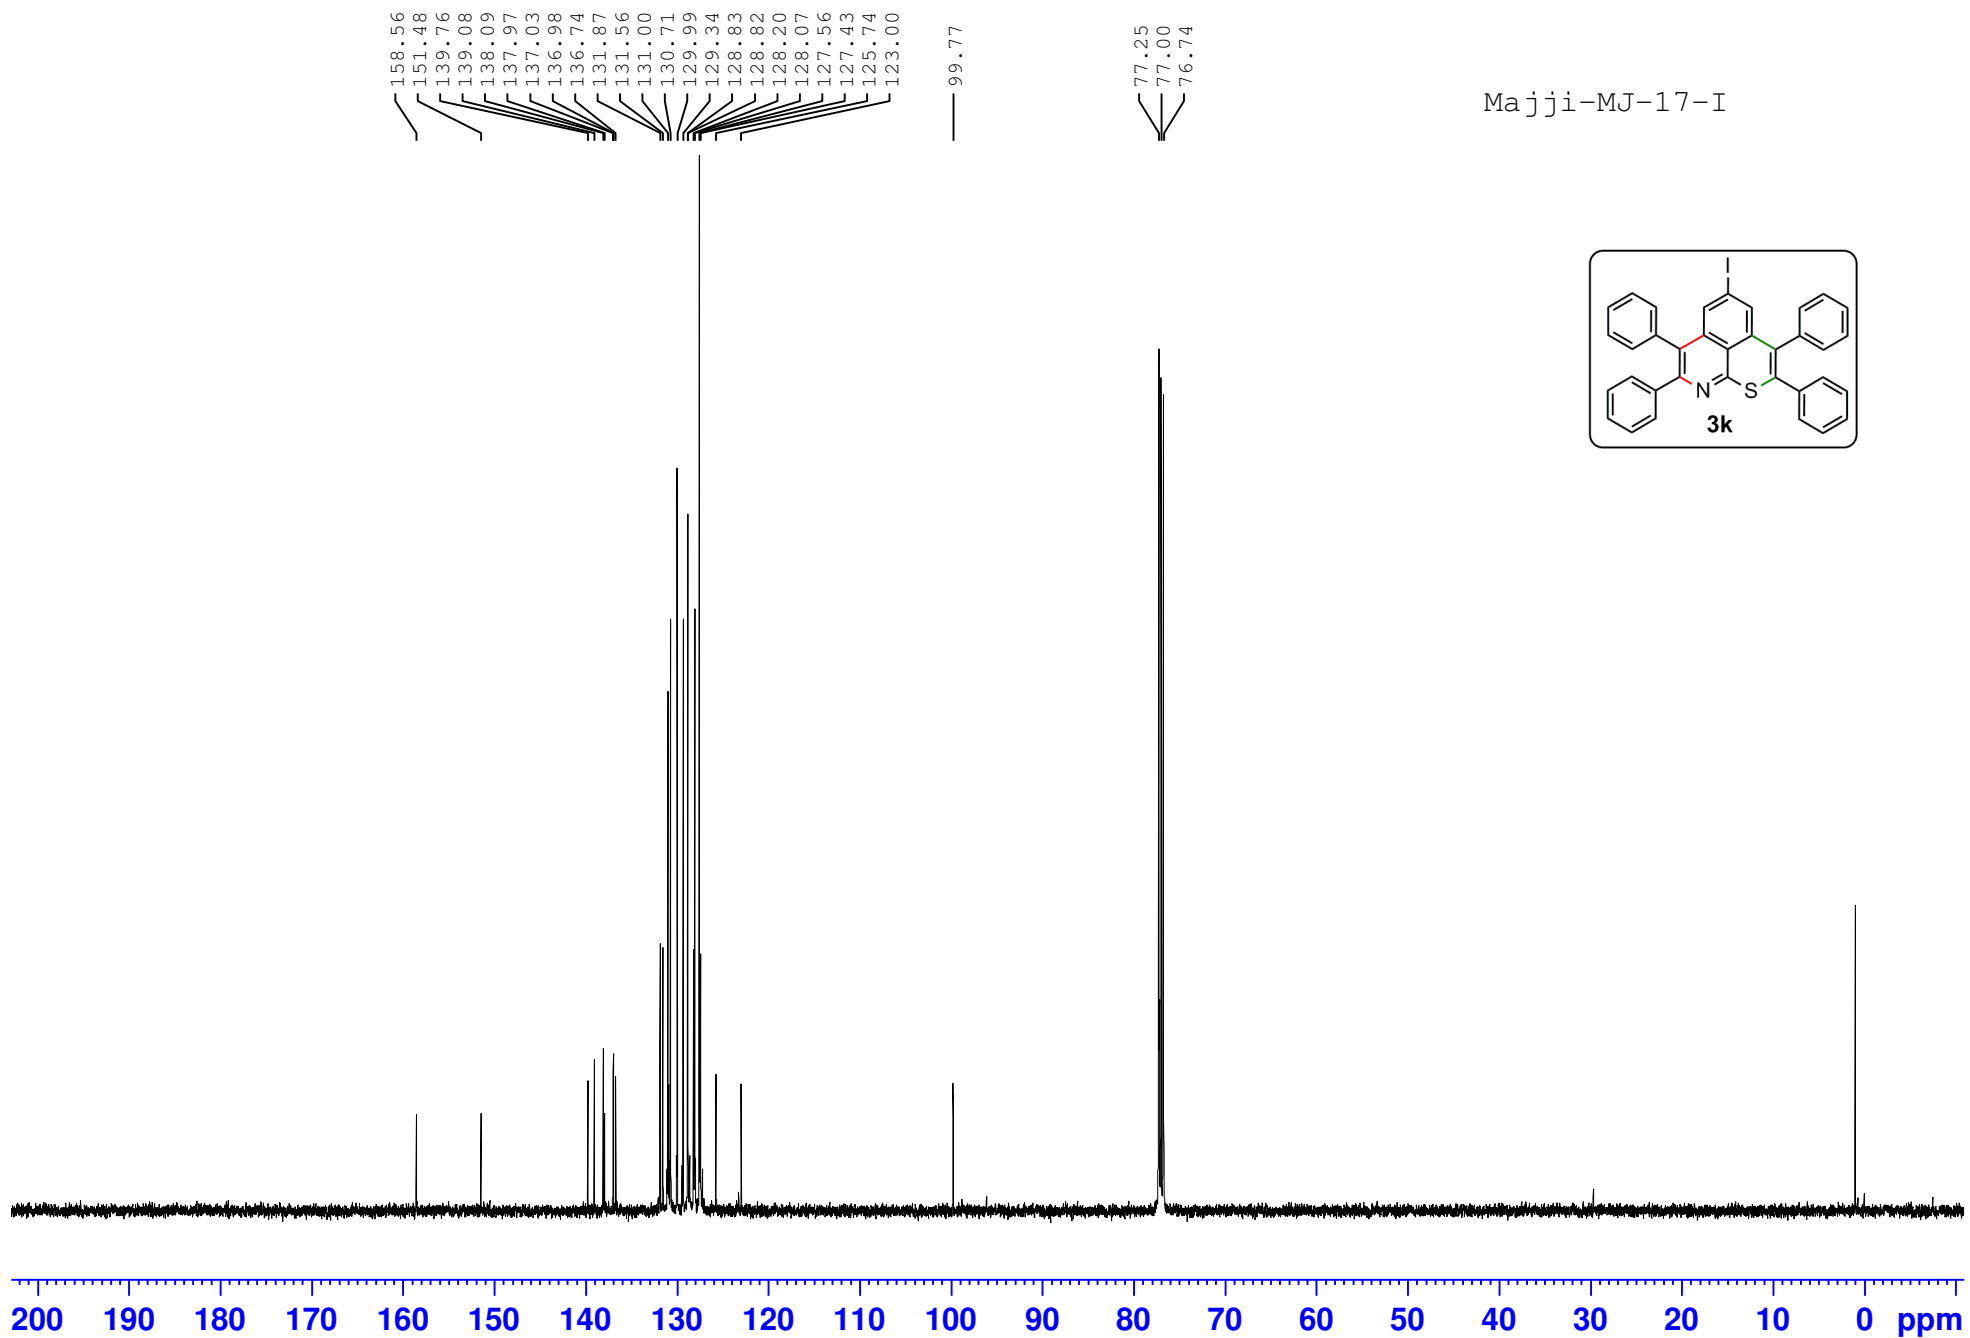

AS-321

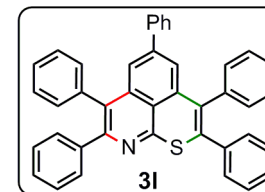

7.440  
7.437  
7.341  
7.326  
7.302  
7.288  
7.260  
7.246  
7.237  
7.234  
7.218  
7.202  
7.199  
7.157  
7.143  
7.060  
7.056

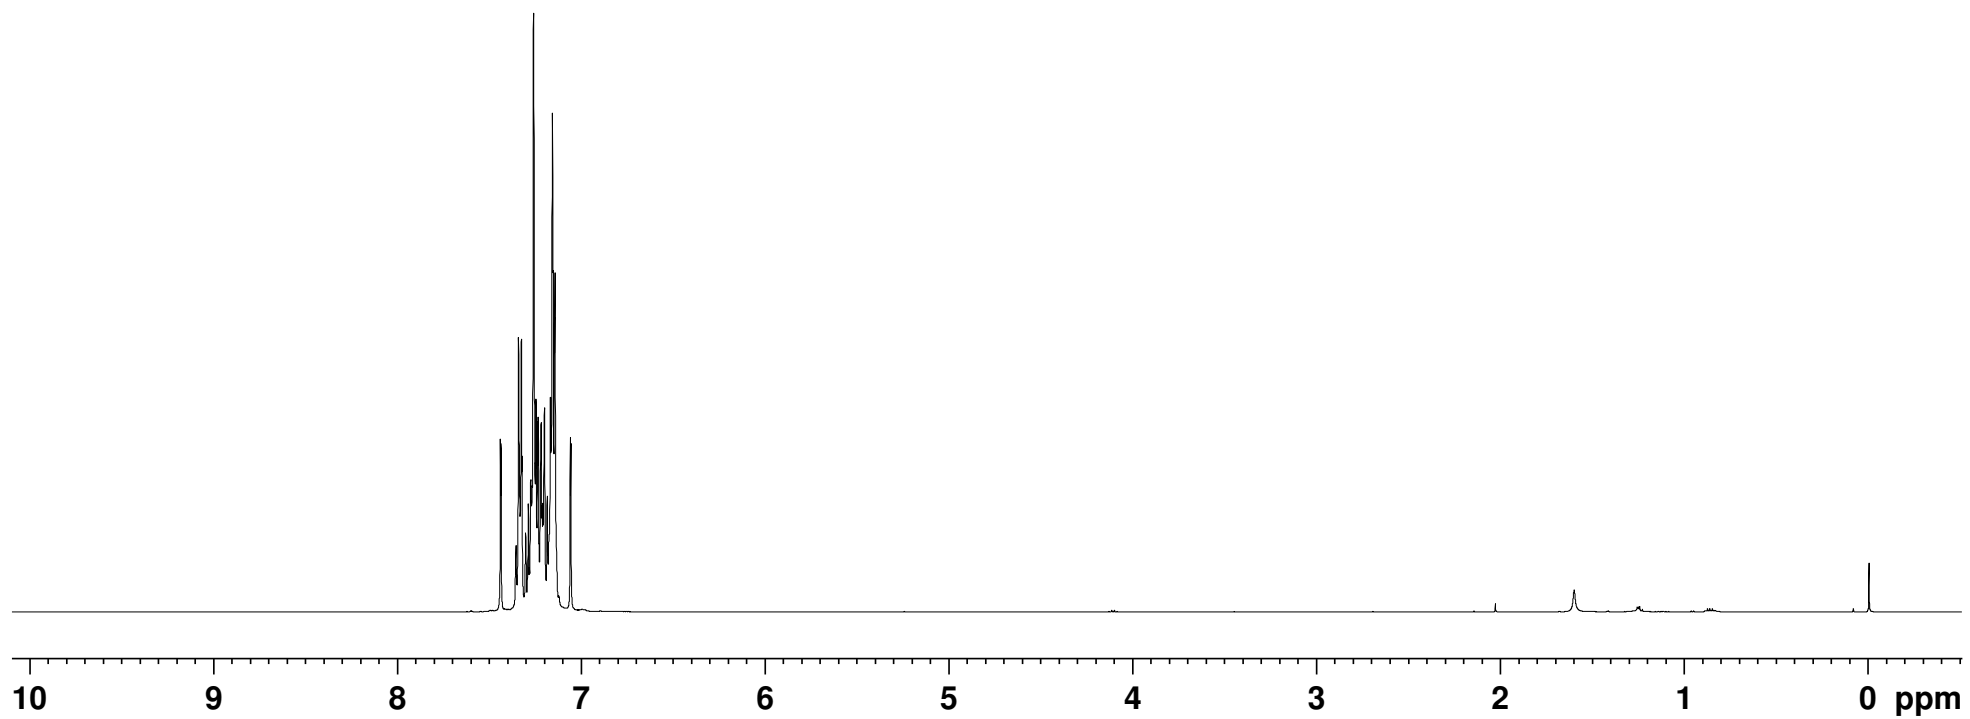

2.00  
4.01  
1.06  
3.09  
2.07  
2.04  
11.20  
2.05



AS-321

158.28  
150.98  
143.42  
140.37  
140.07  
138.18  
137.65  
137.38  
137.32  
137.17  
136.52  
132.17  
131.09  
130.81  
130.03  
129.45  
128.73  
128.69  
128.67  
128.02  
127.90  
127.53  
127.31  
127.26  
127.21  
123.24  
122.74  
121.21  
77.25  
77.00  
76.75

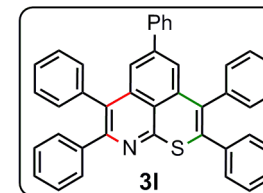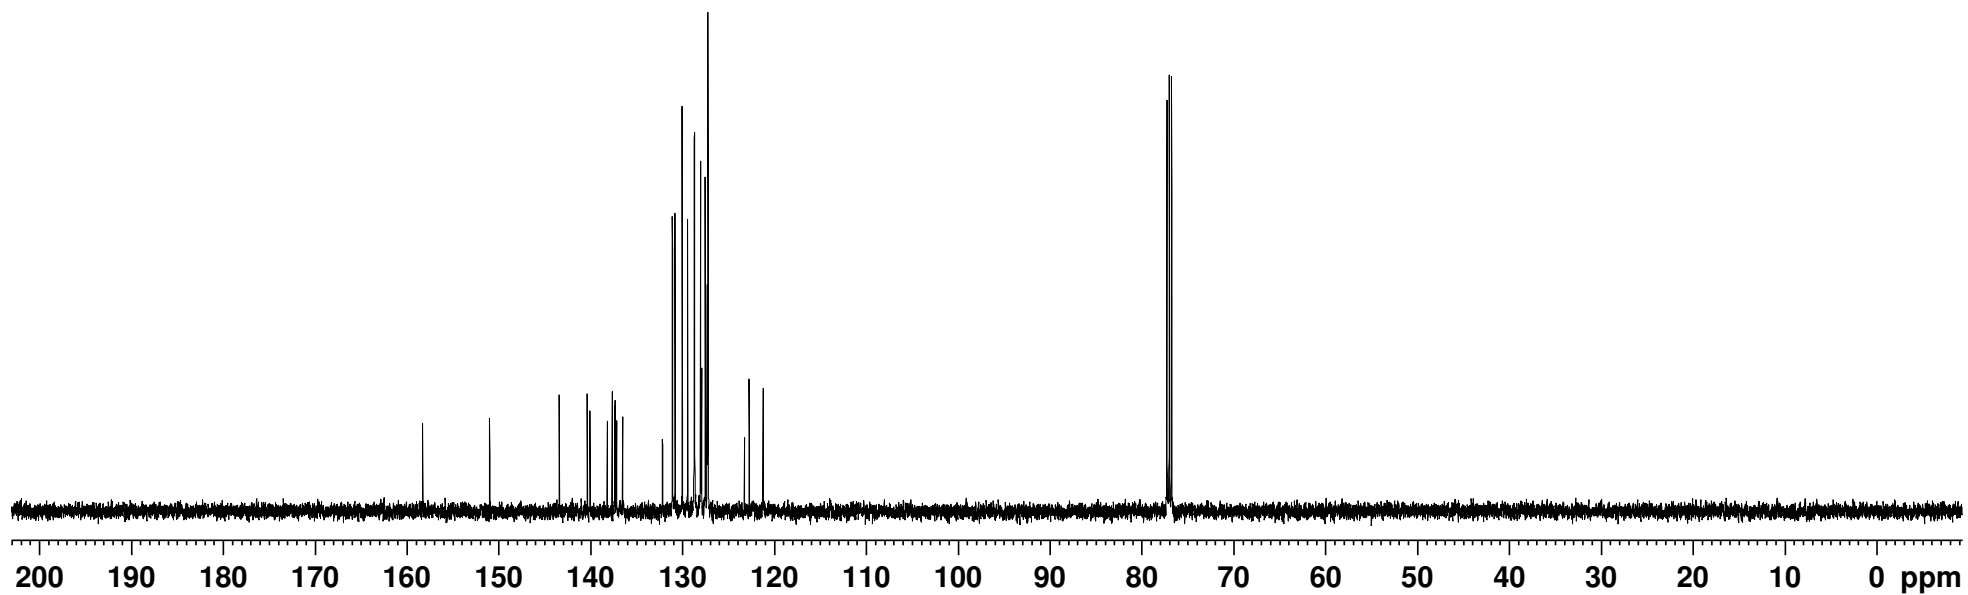

ARIJIT-AS-170

7.581  
7.459  
7.441  
7.411  
7.404  
7.395  
7.391  
7.387  
7.374  
7.355  
7.330  
7.322  
7.312  
7.260  
7.197  
7.181  
7.019

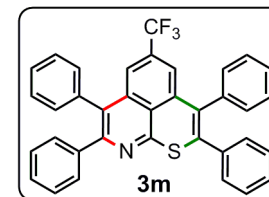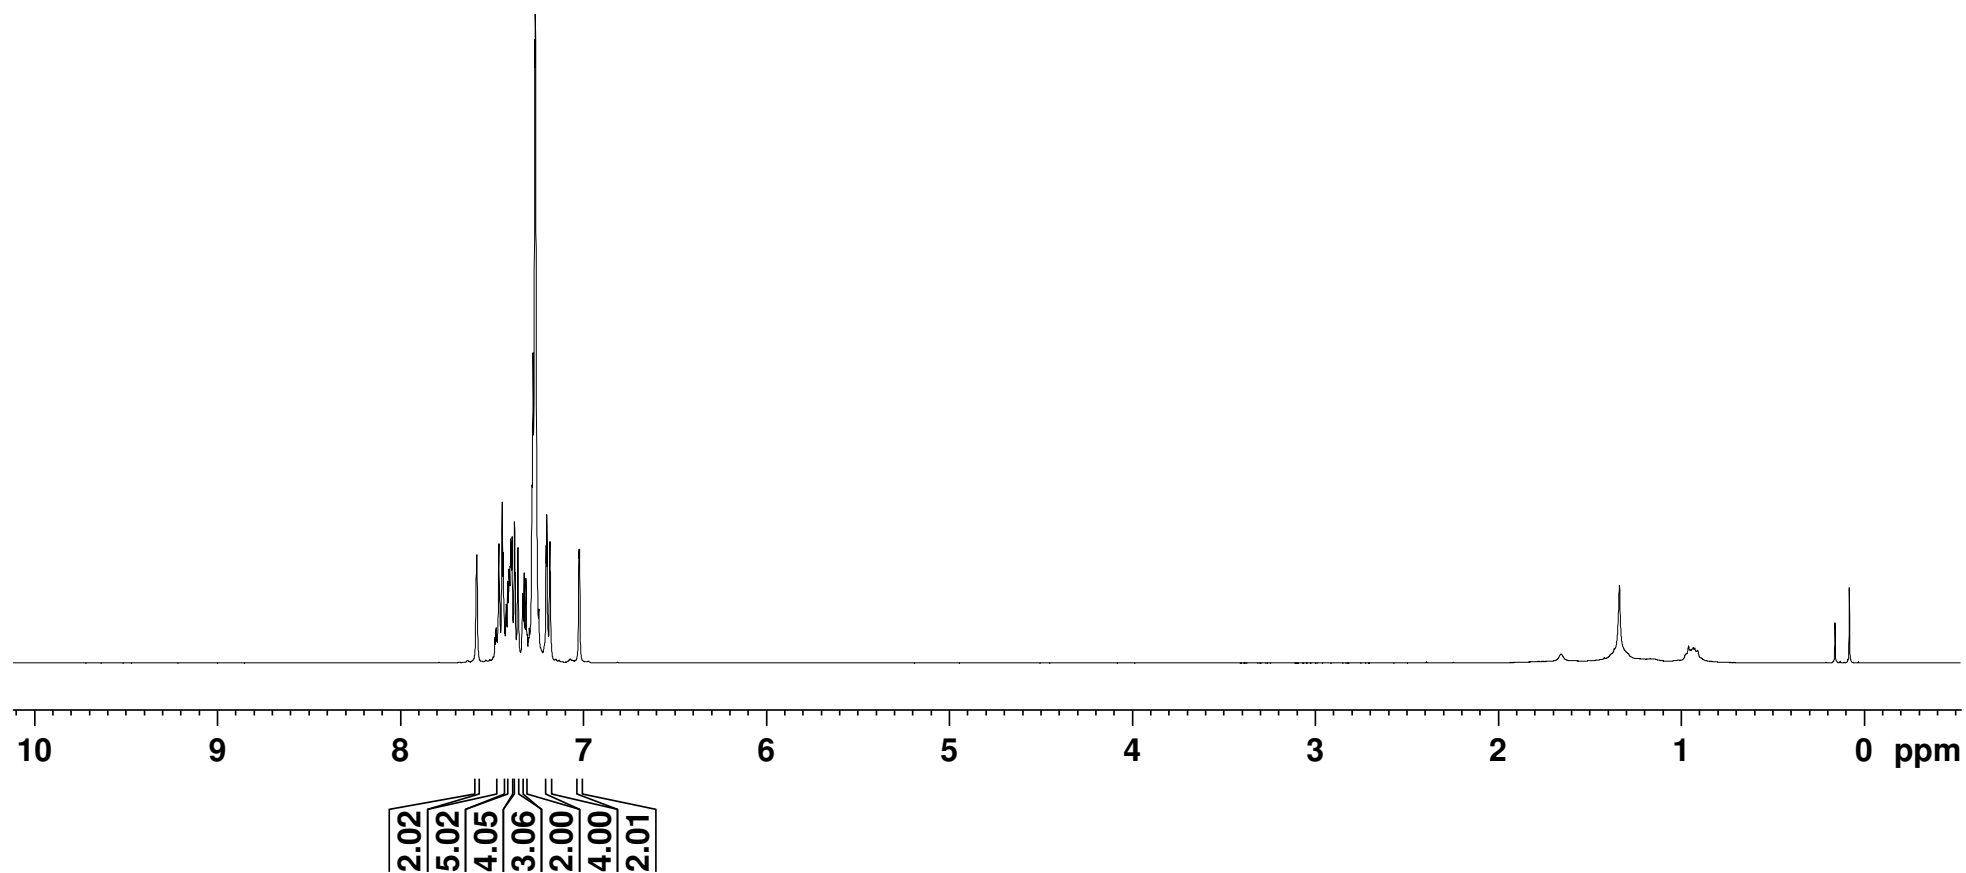

AS-170

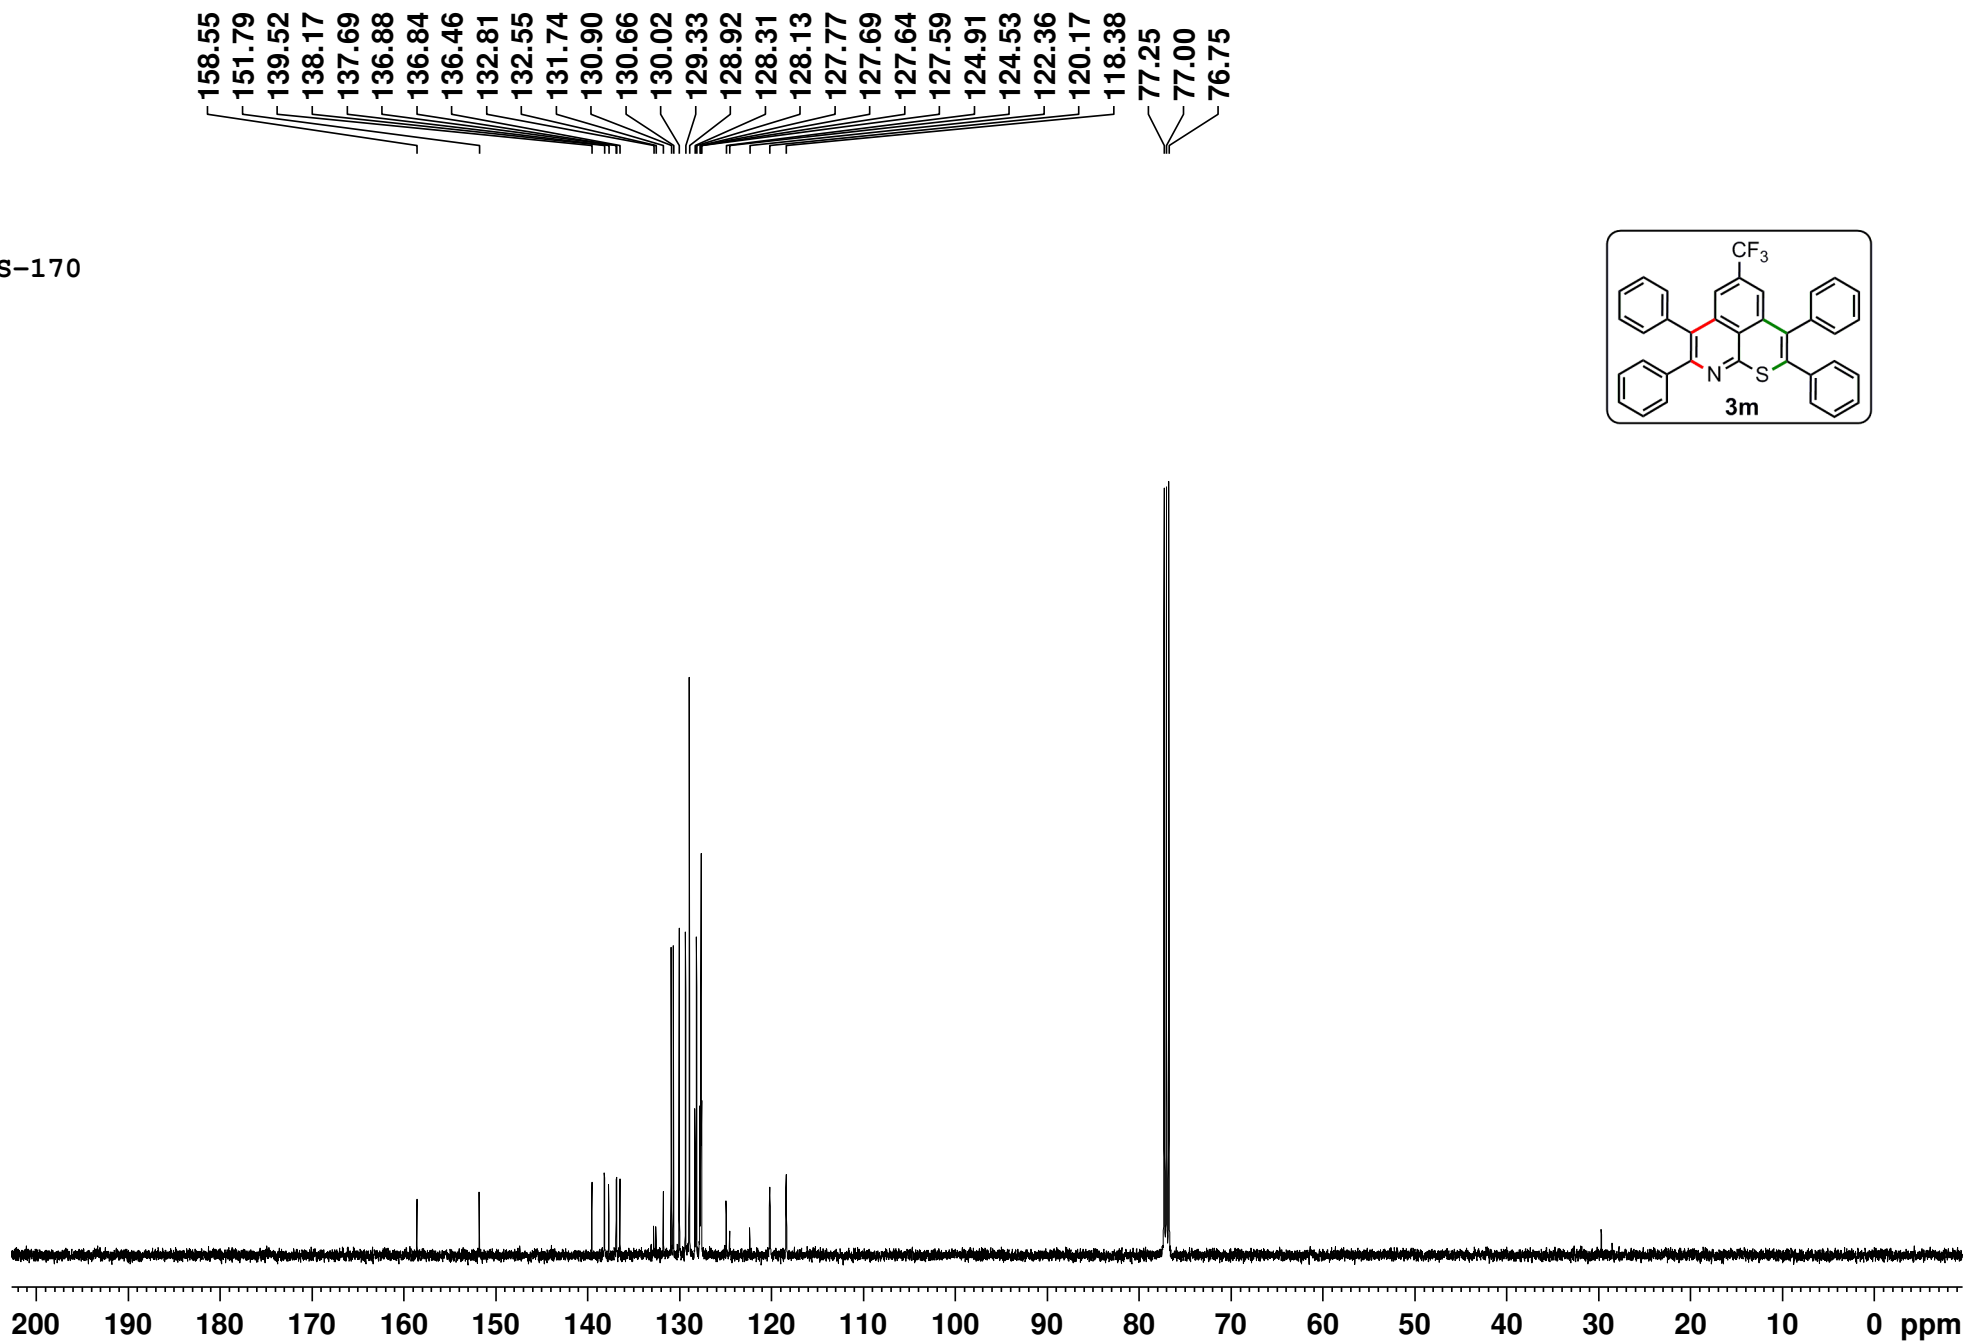

AS-170

-63.62

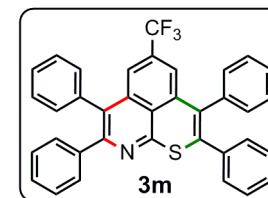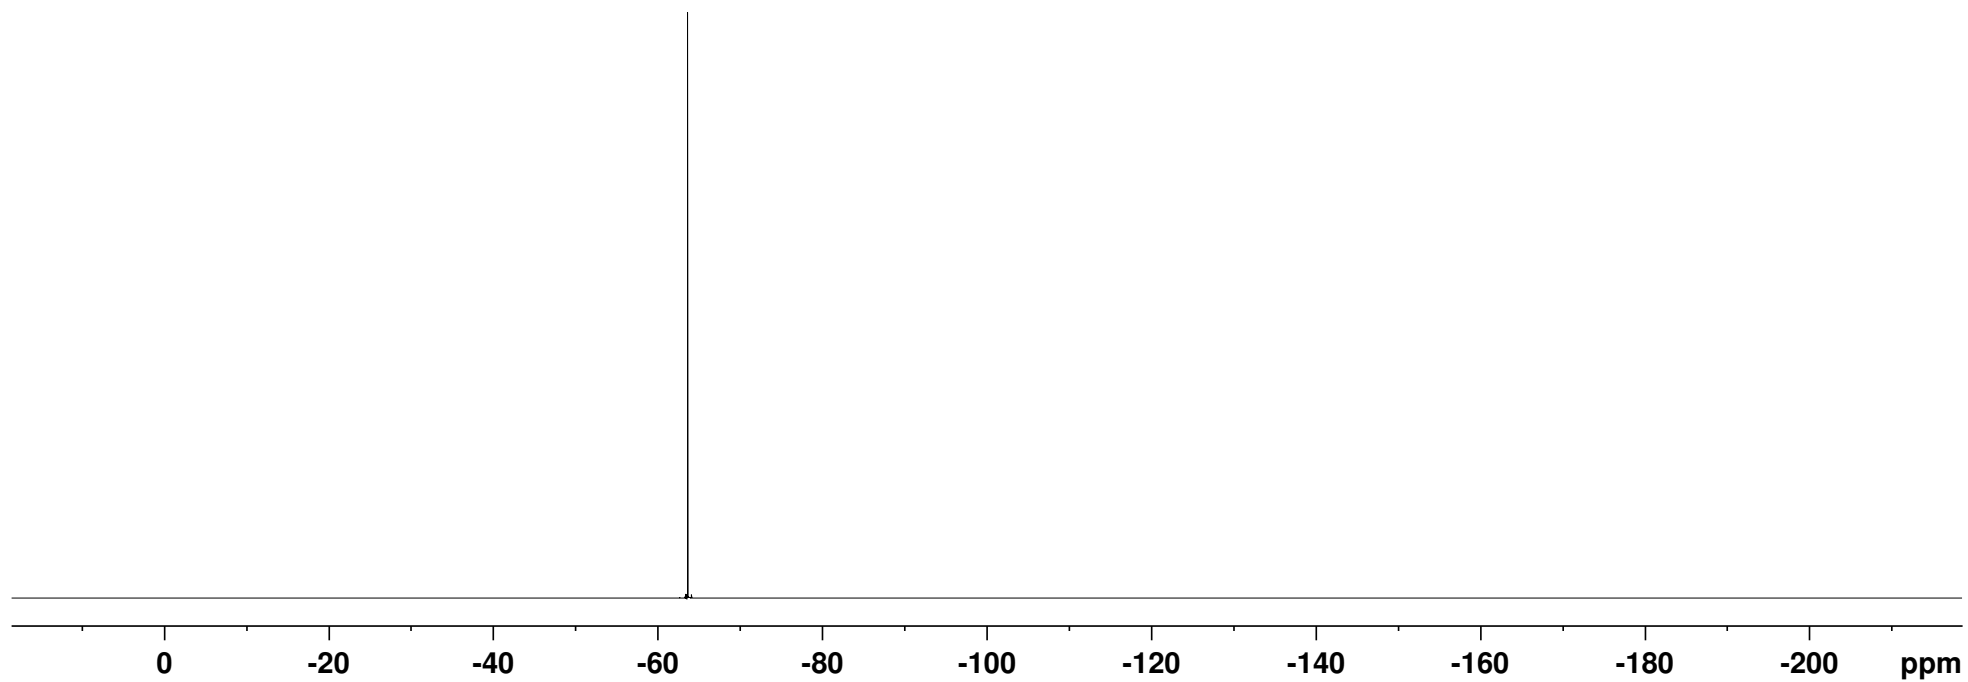

ARIJIT-AS-169

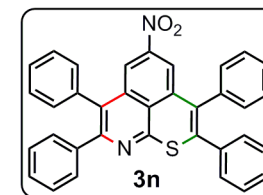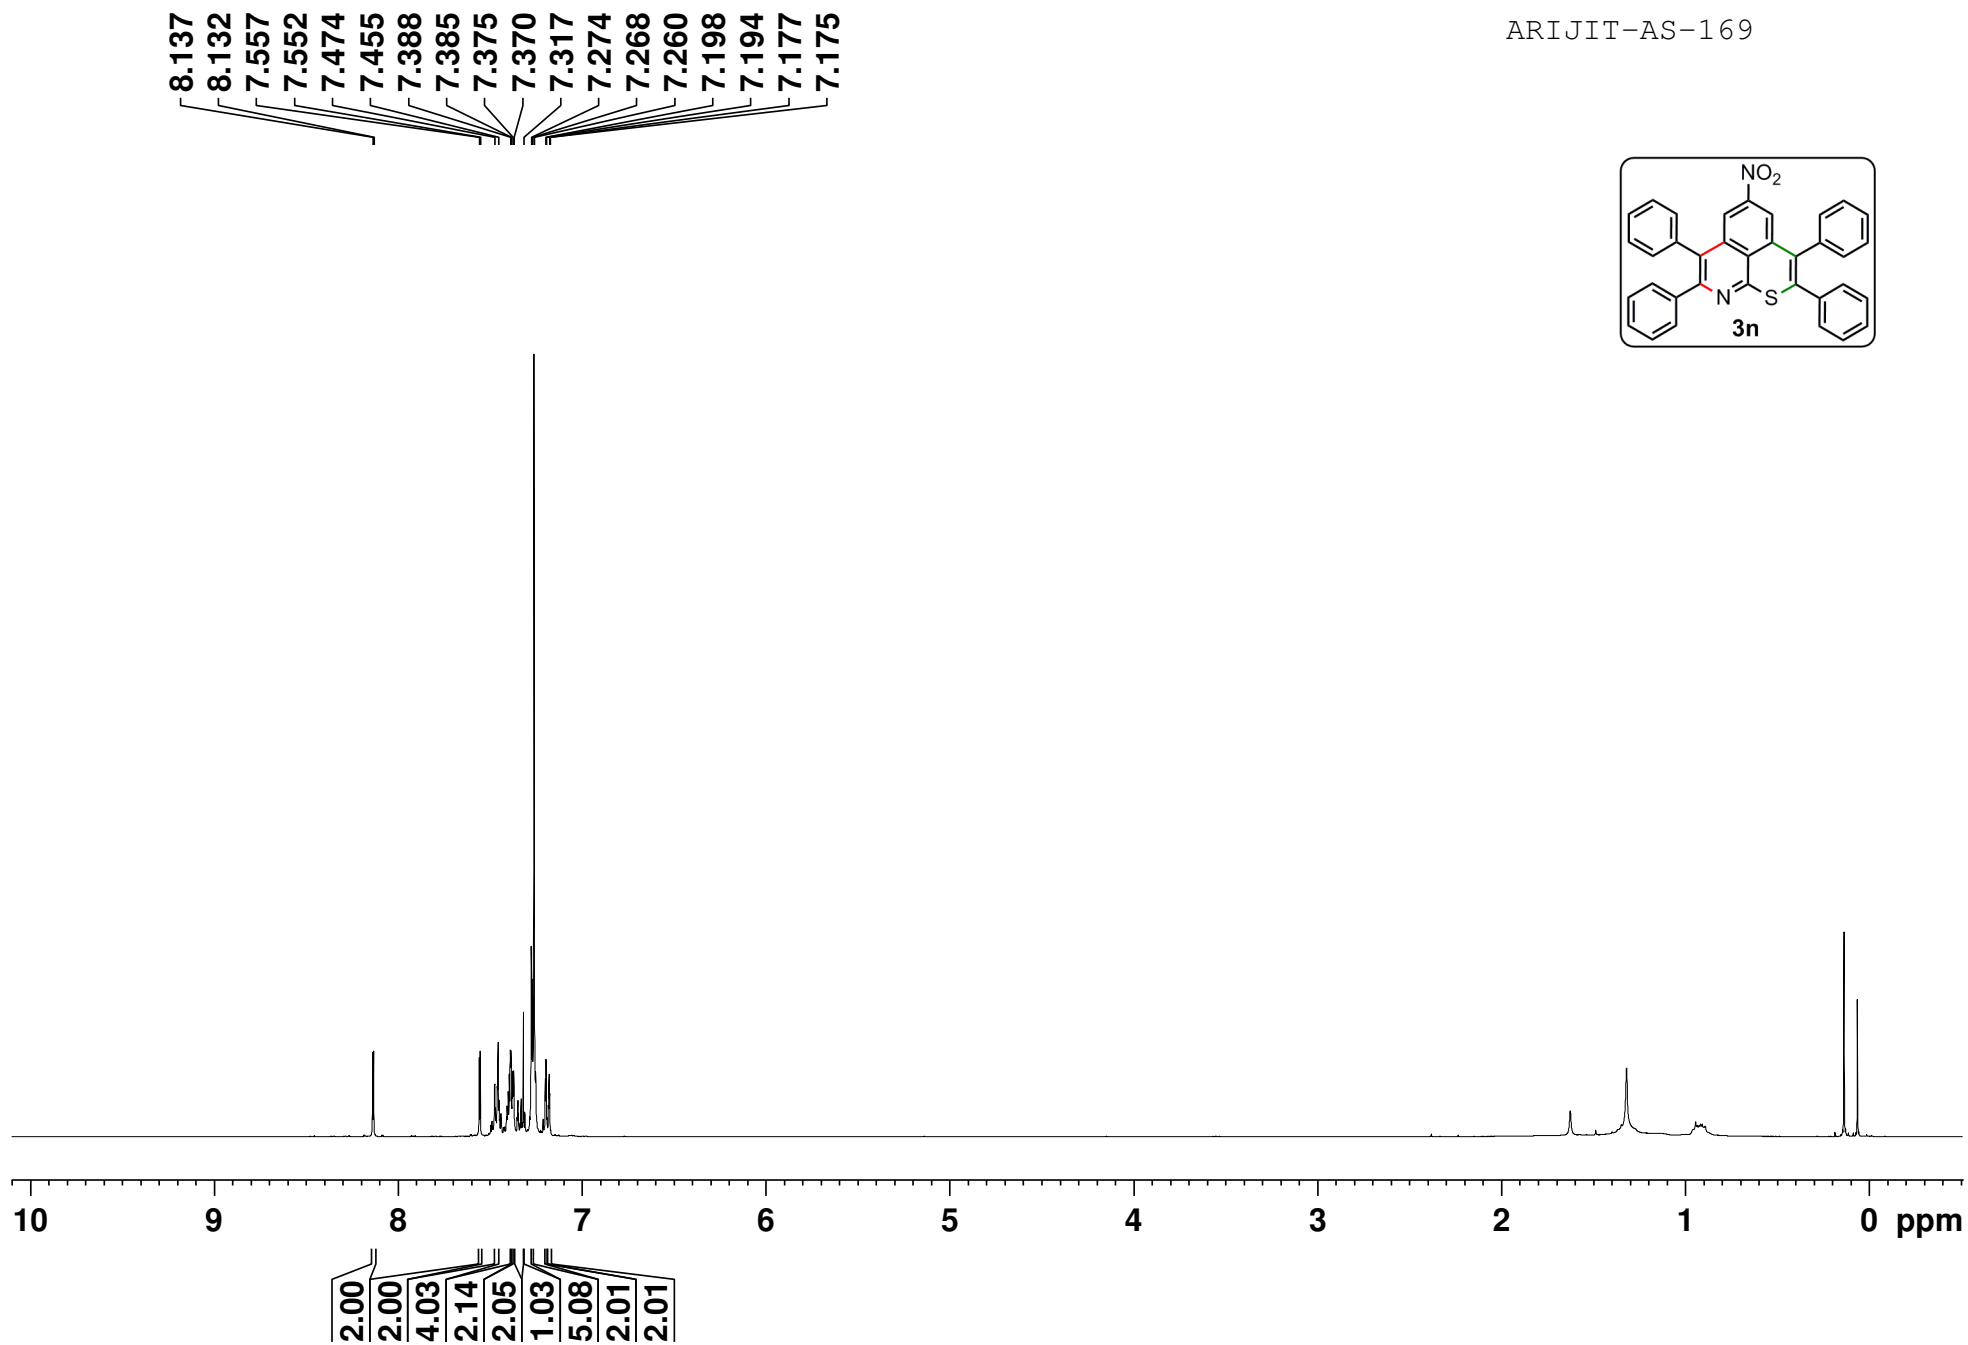

AS-169

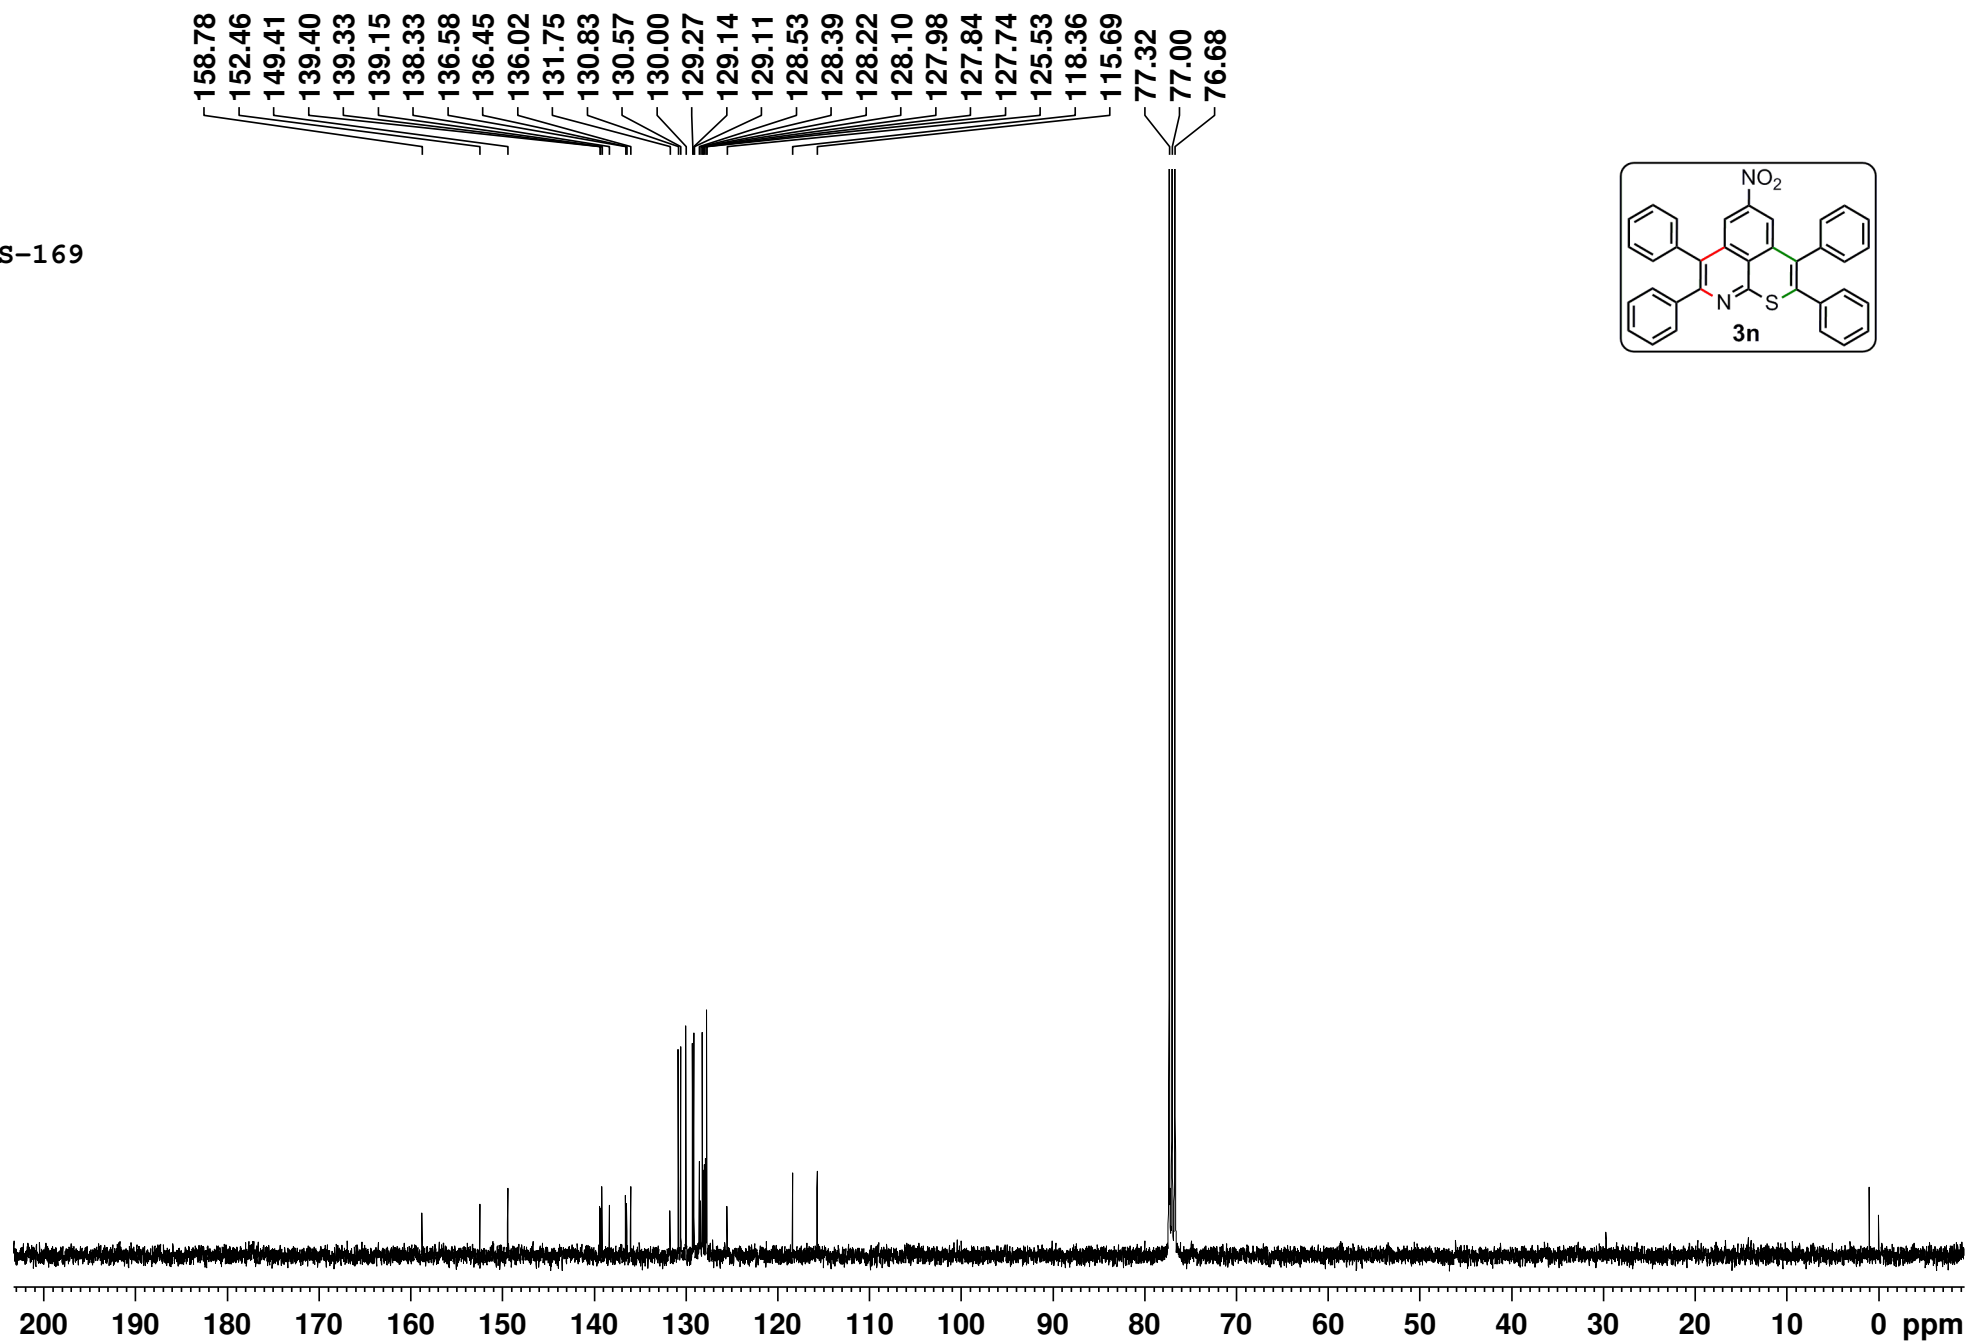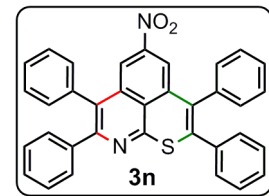

MJ-17-125

7.953  
7.398  
7.384  
7.370  
7.357  
7.343  
7.326  
7.315  
7.299  
7.284  
7.260  
7.233  
7.218  
7.202  
7.193  
7.185  
7.140  
7.125

3.735

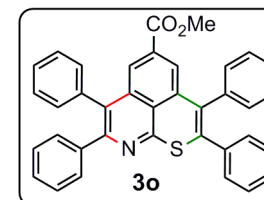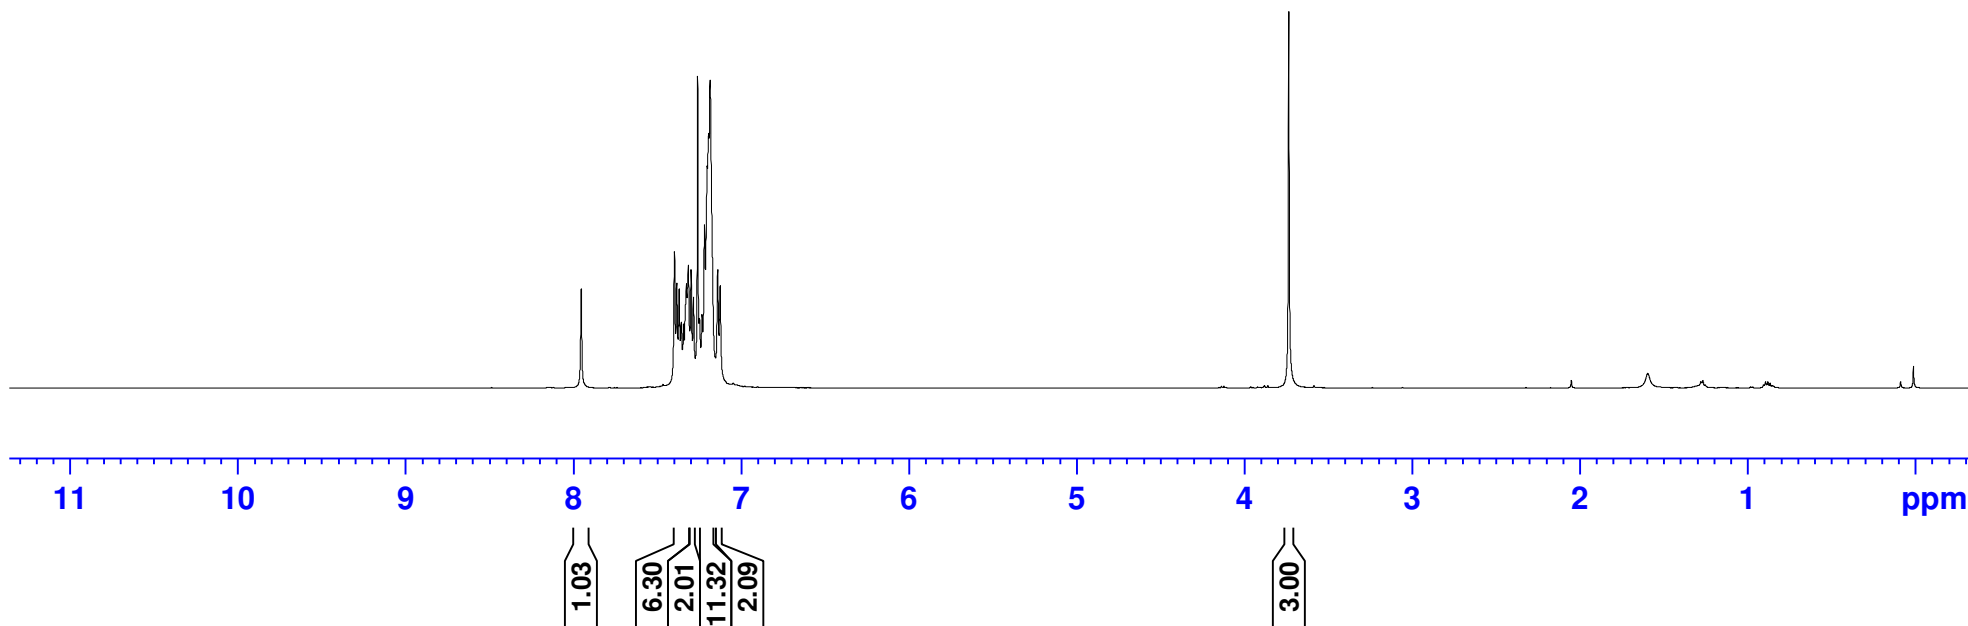

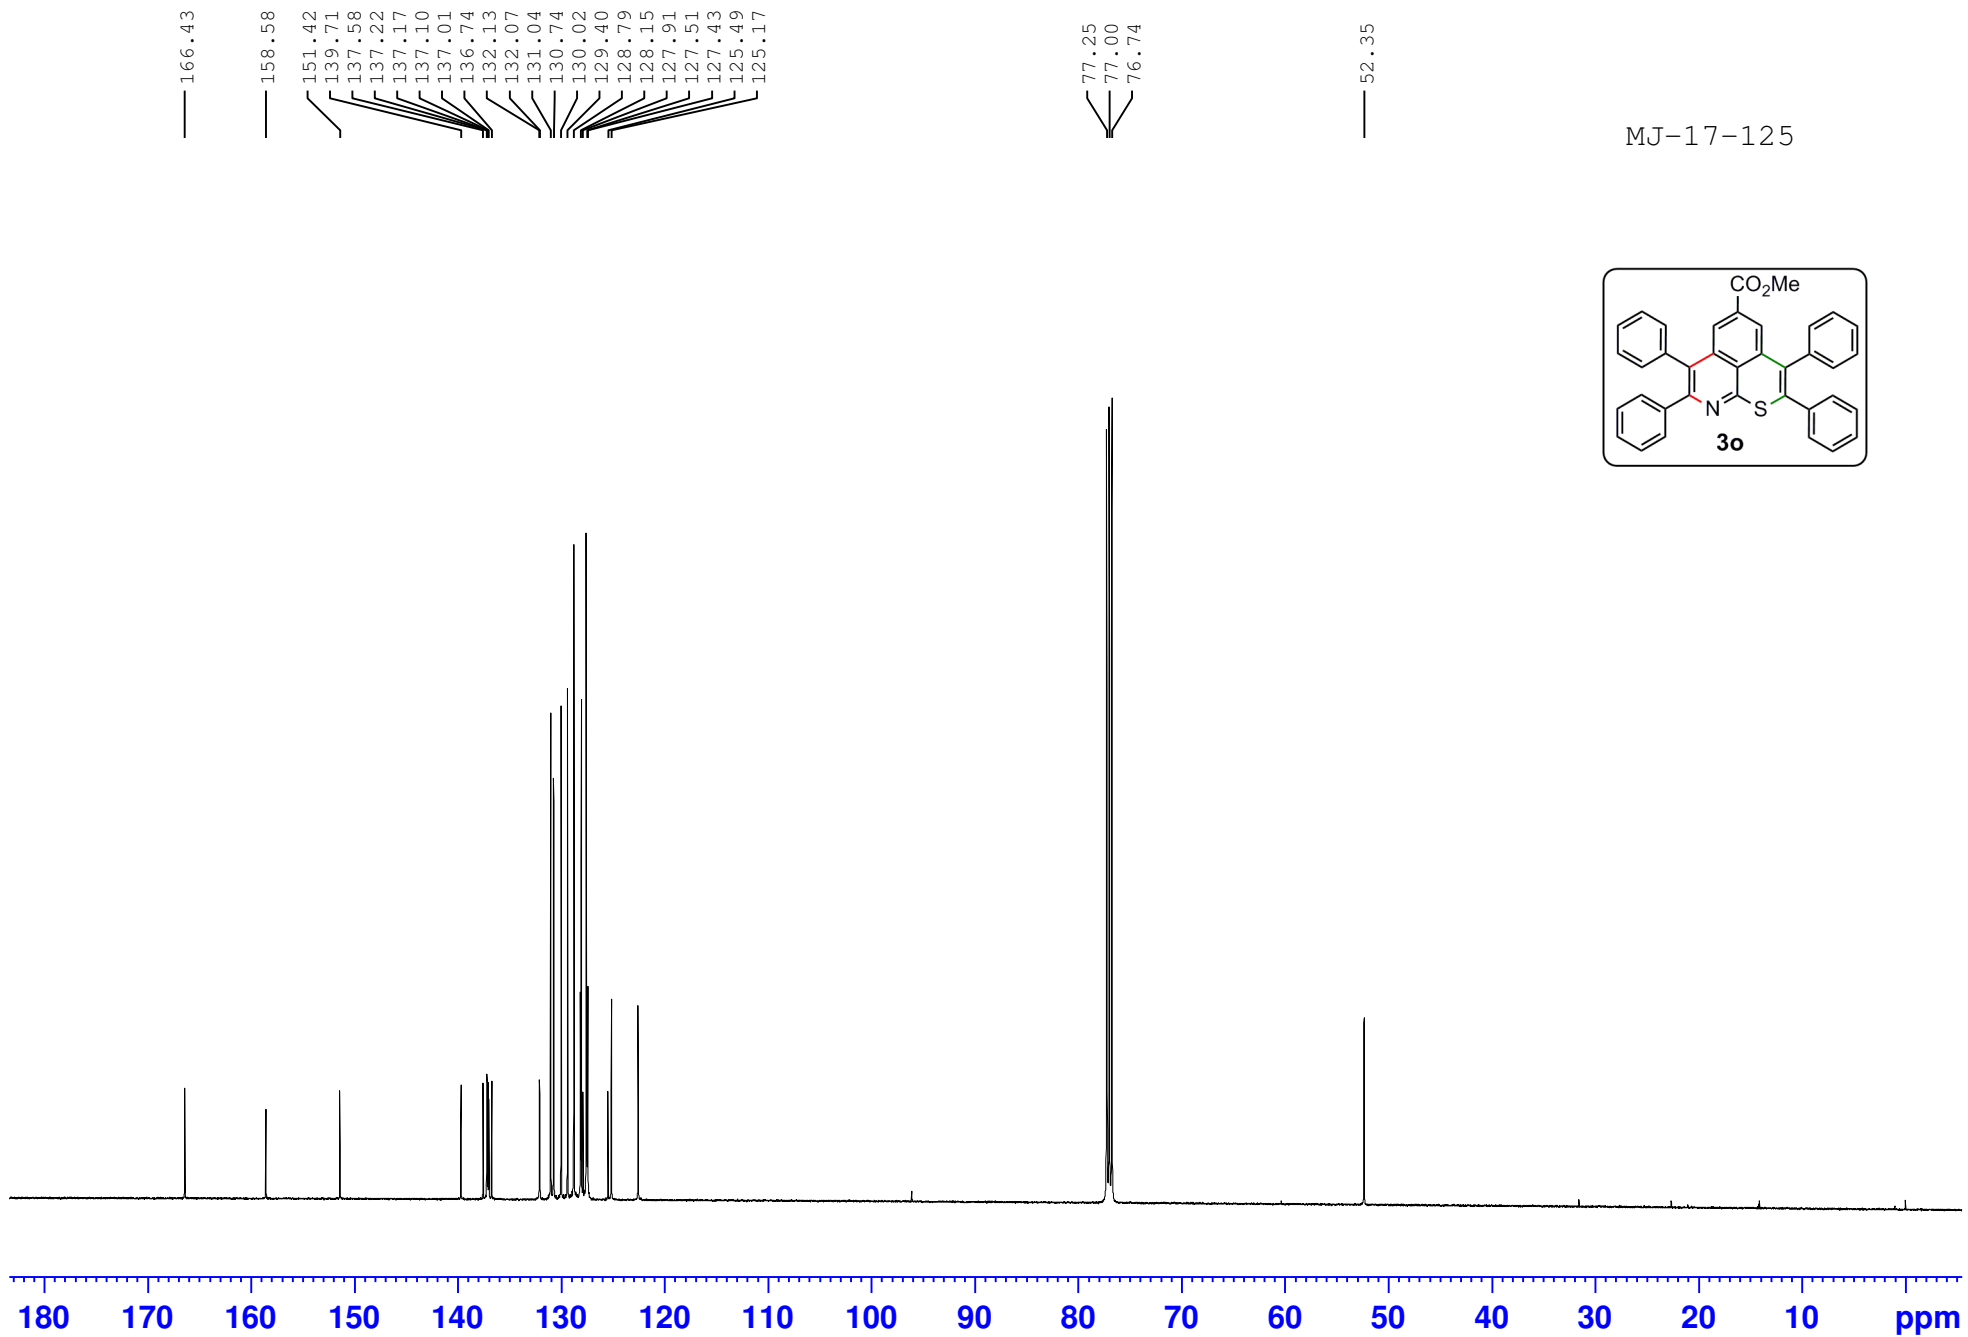



MAJJI-17-310 R

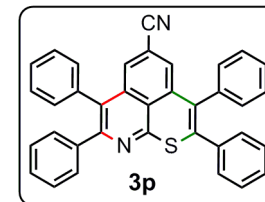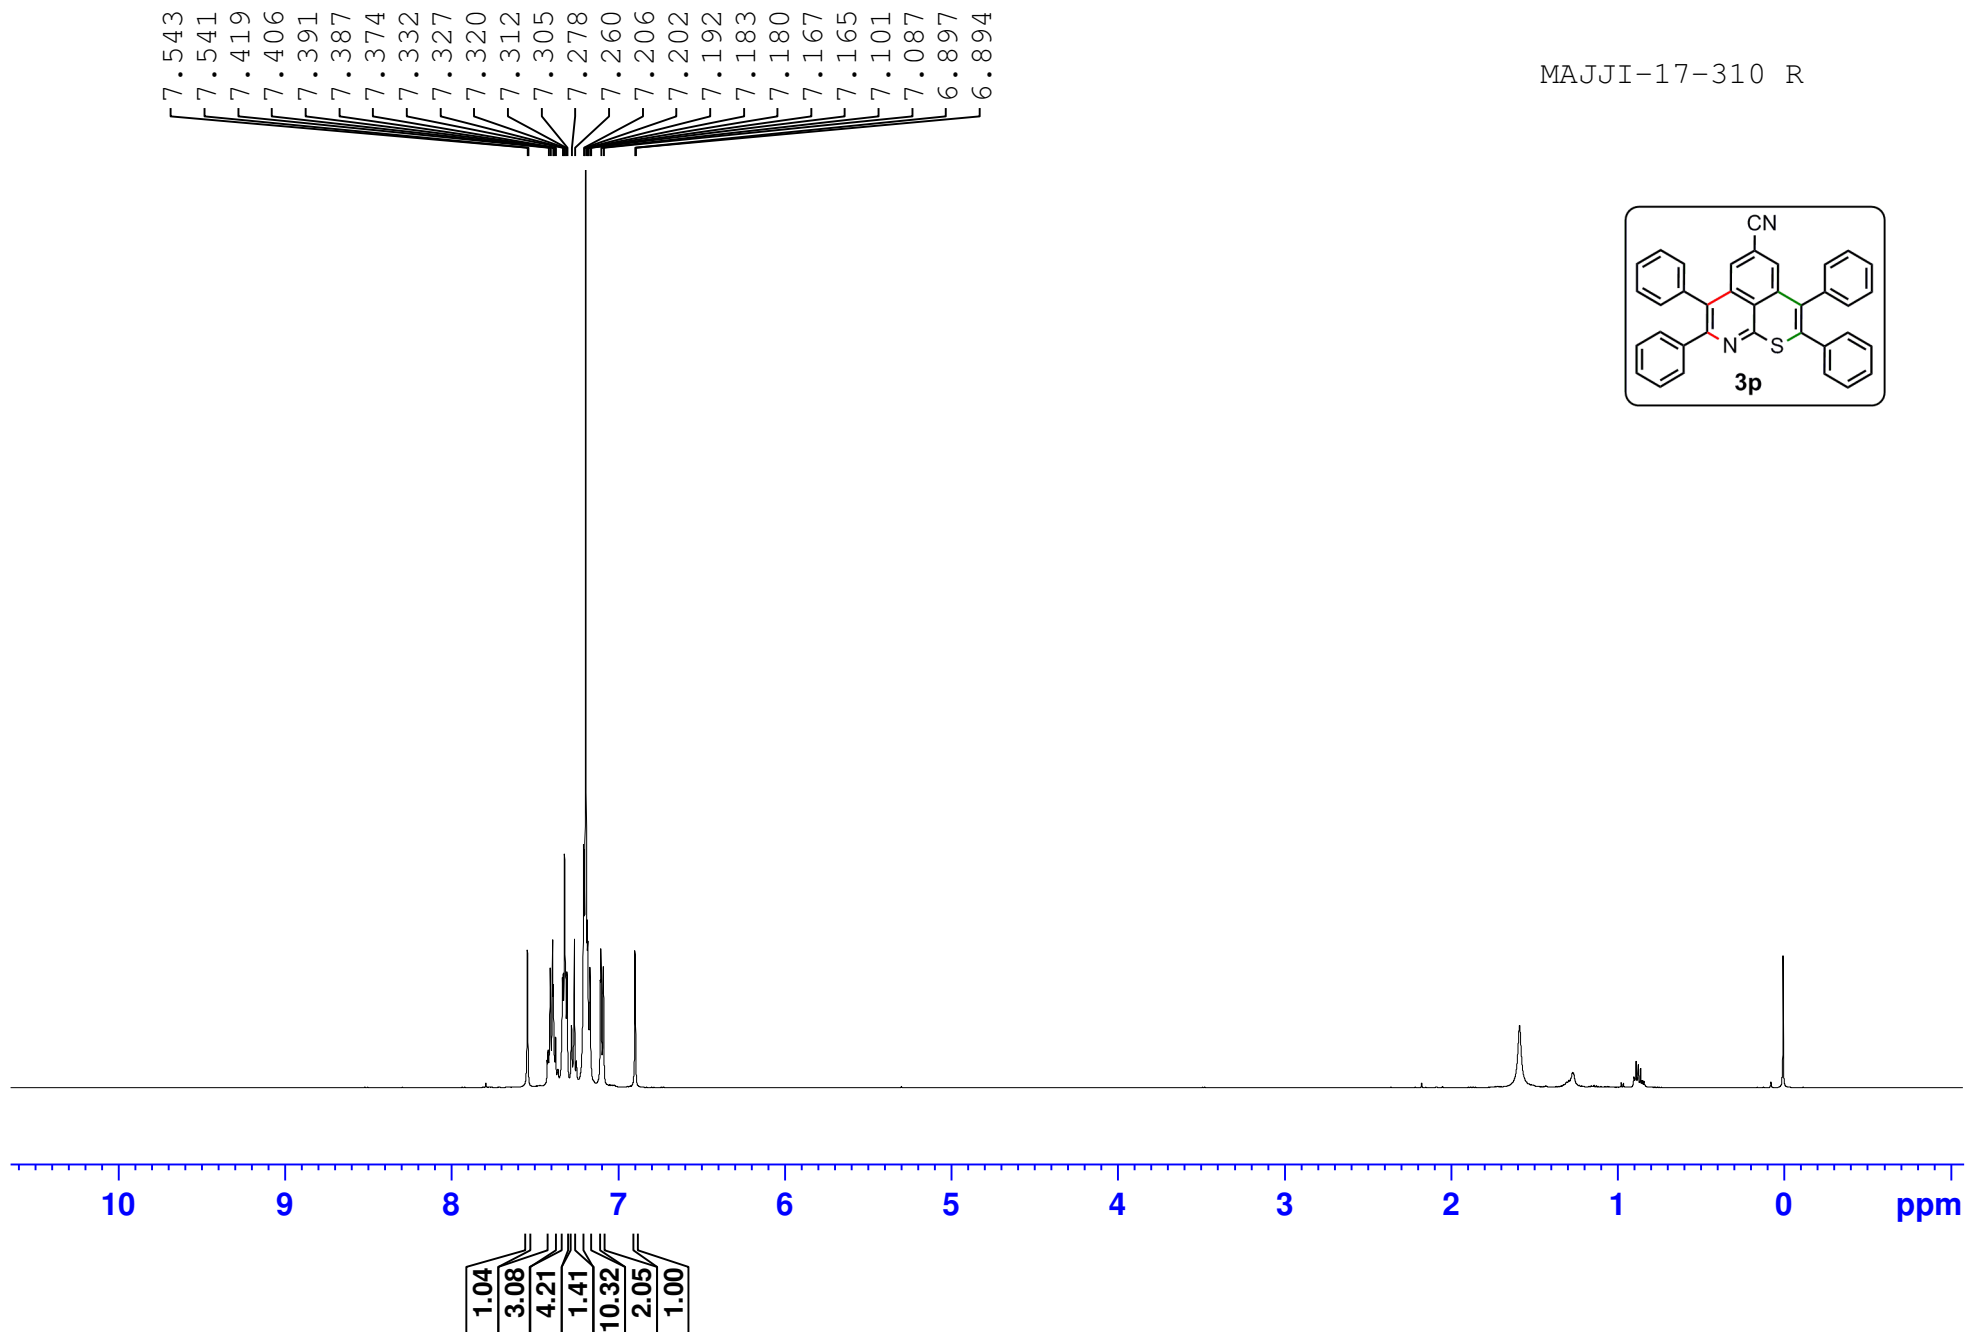

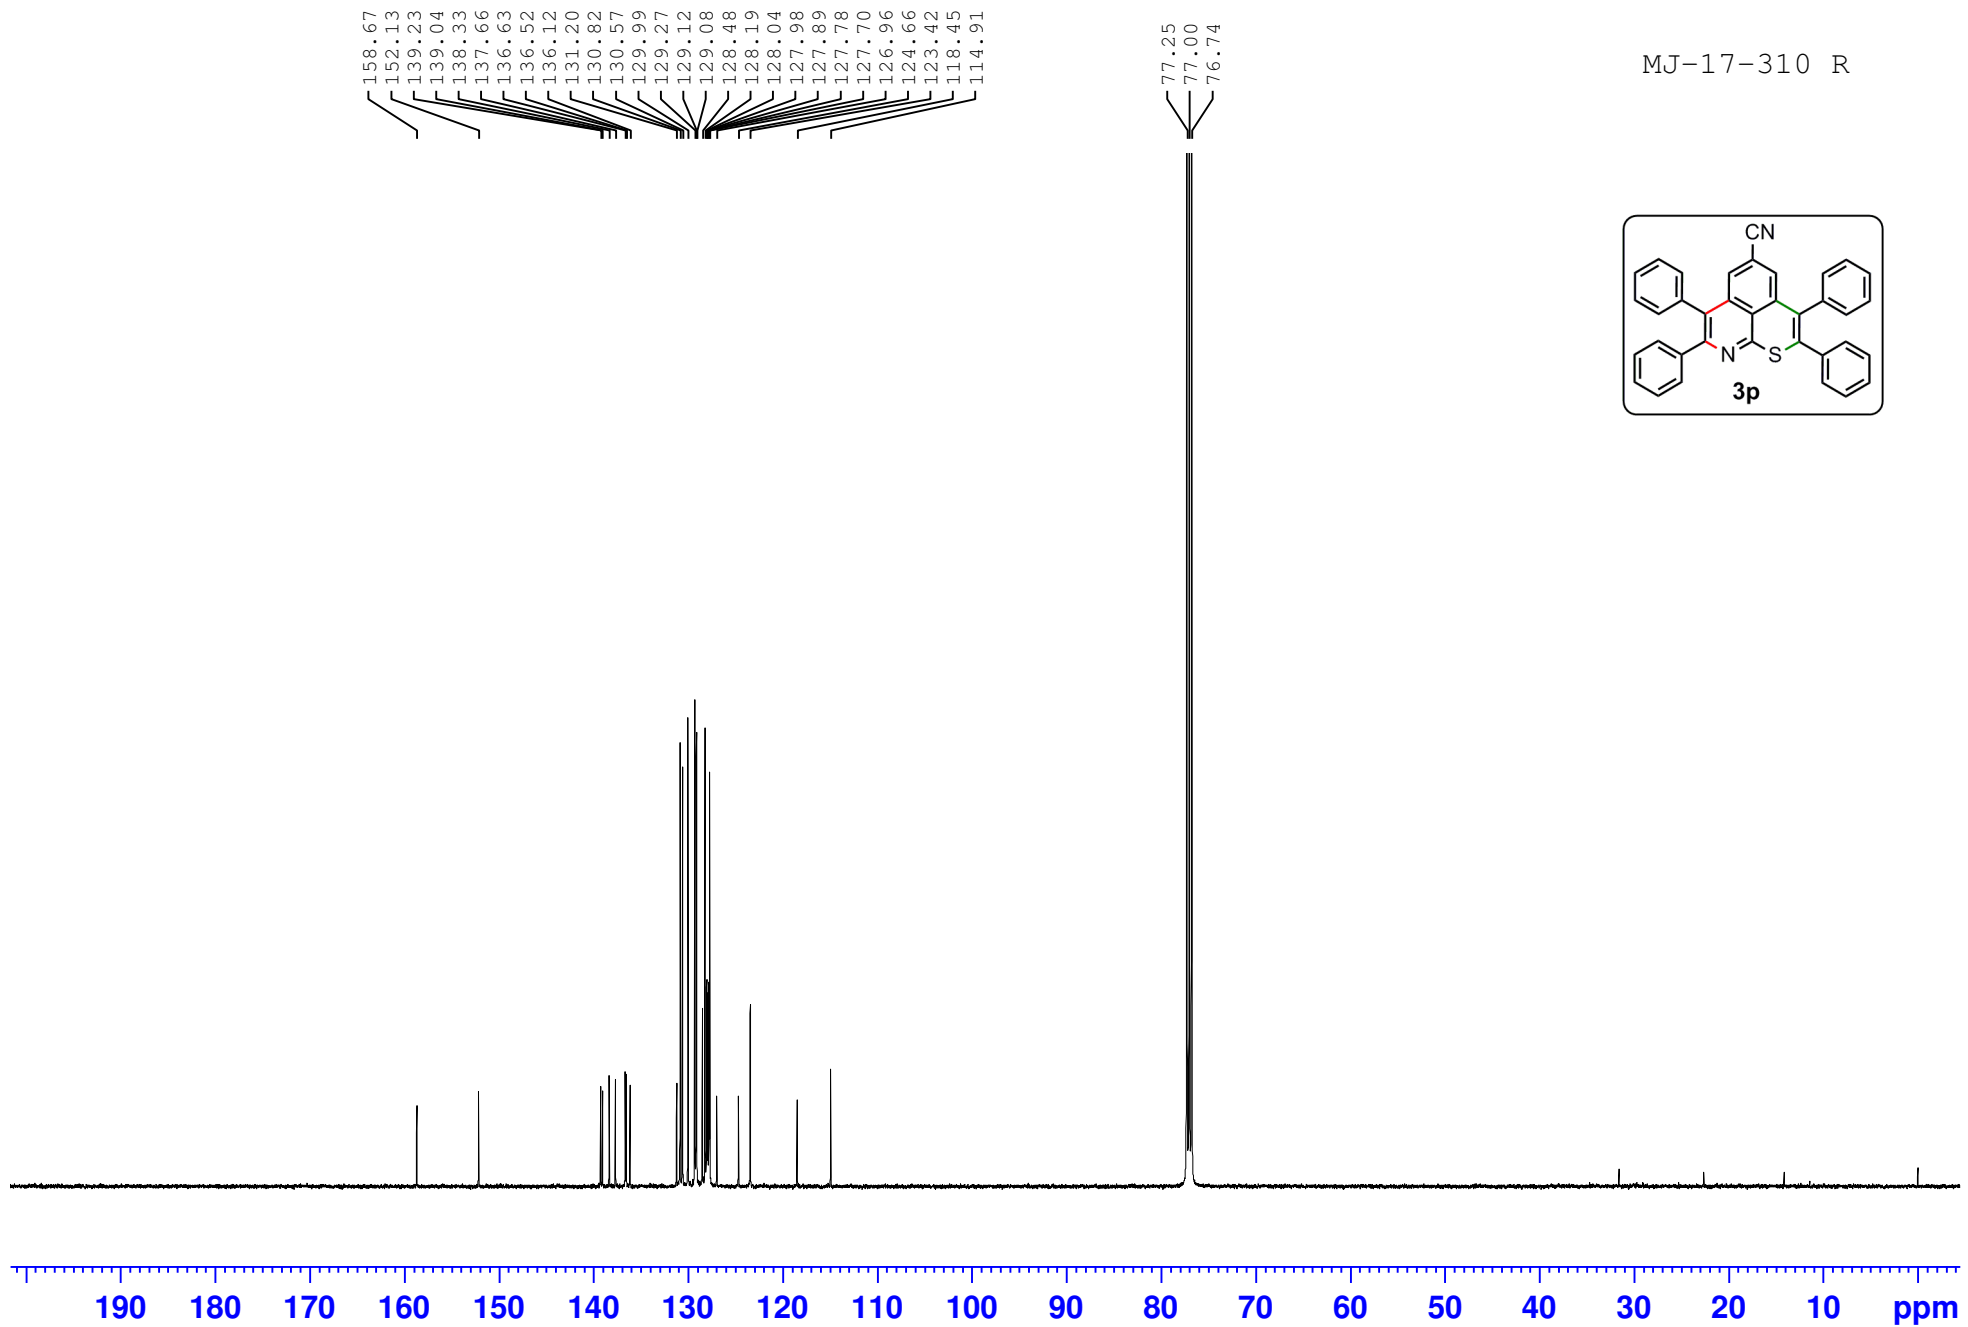

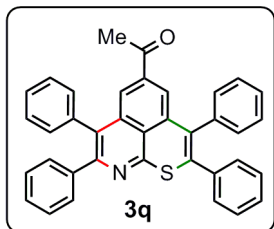

7.829  
7.413  
7.399  
7.384  
7.371  
7.357  
7.353  
7.345  
7.329  
7.327  
7.306  
7.291  
7.260  
7.237  
7.223  
7.205  
7.198  
7.191  
7.181  
7.176  
7.147  
7.132

— 2.305

MAJJI-17-214

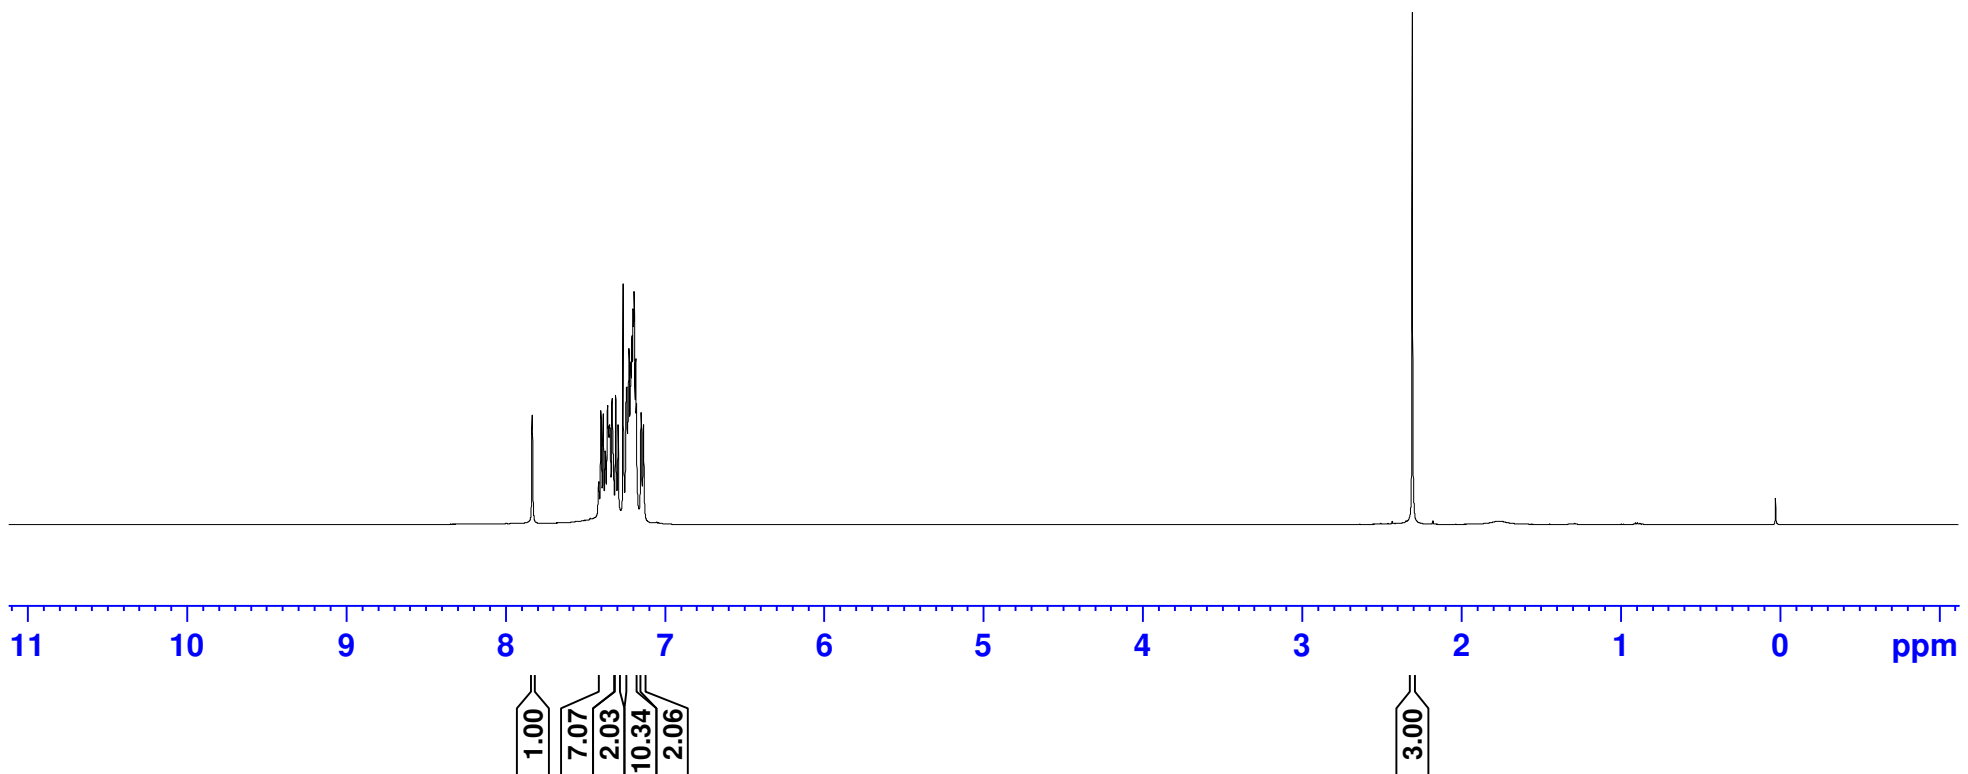

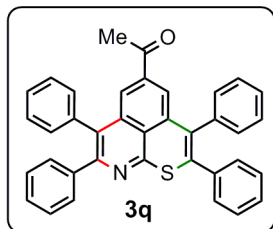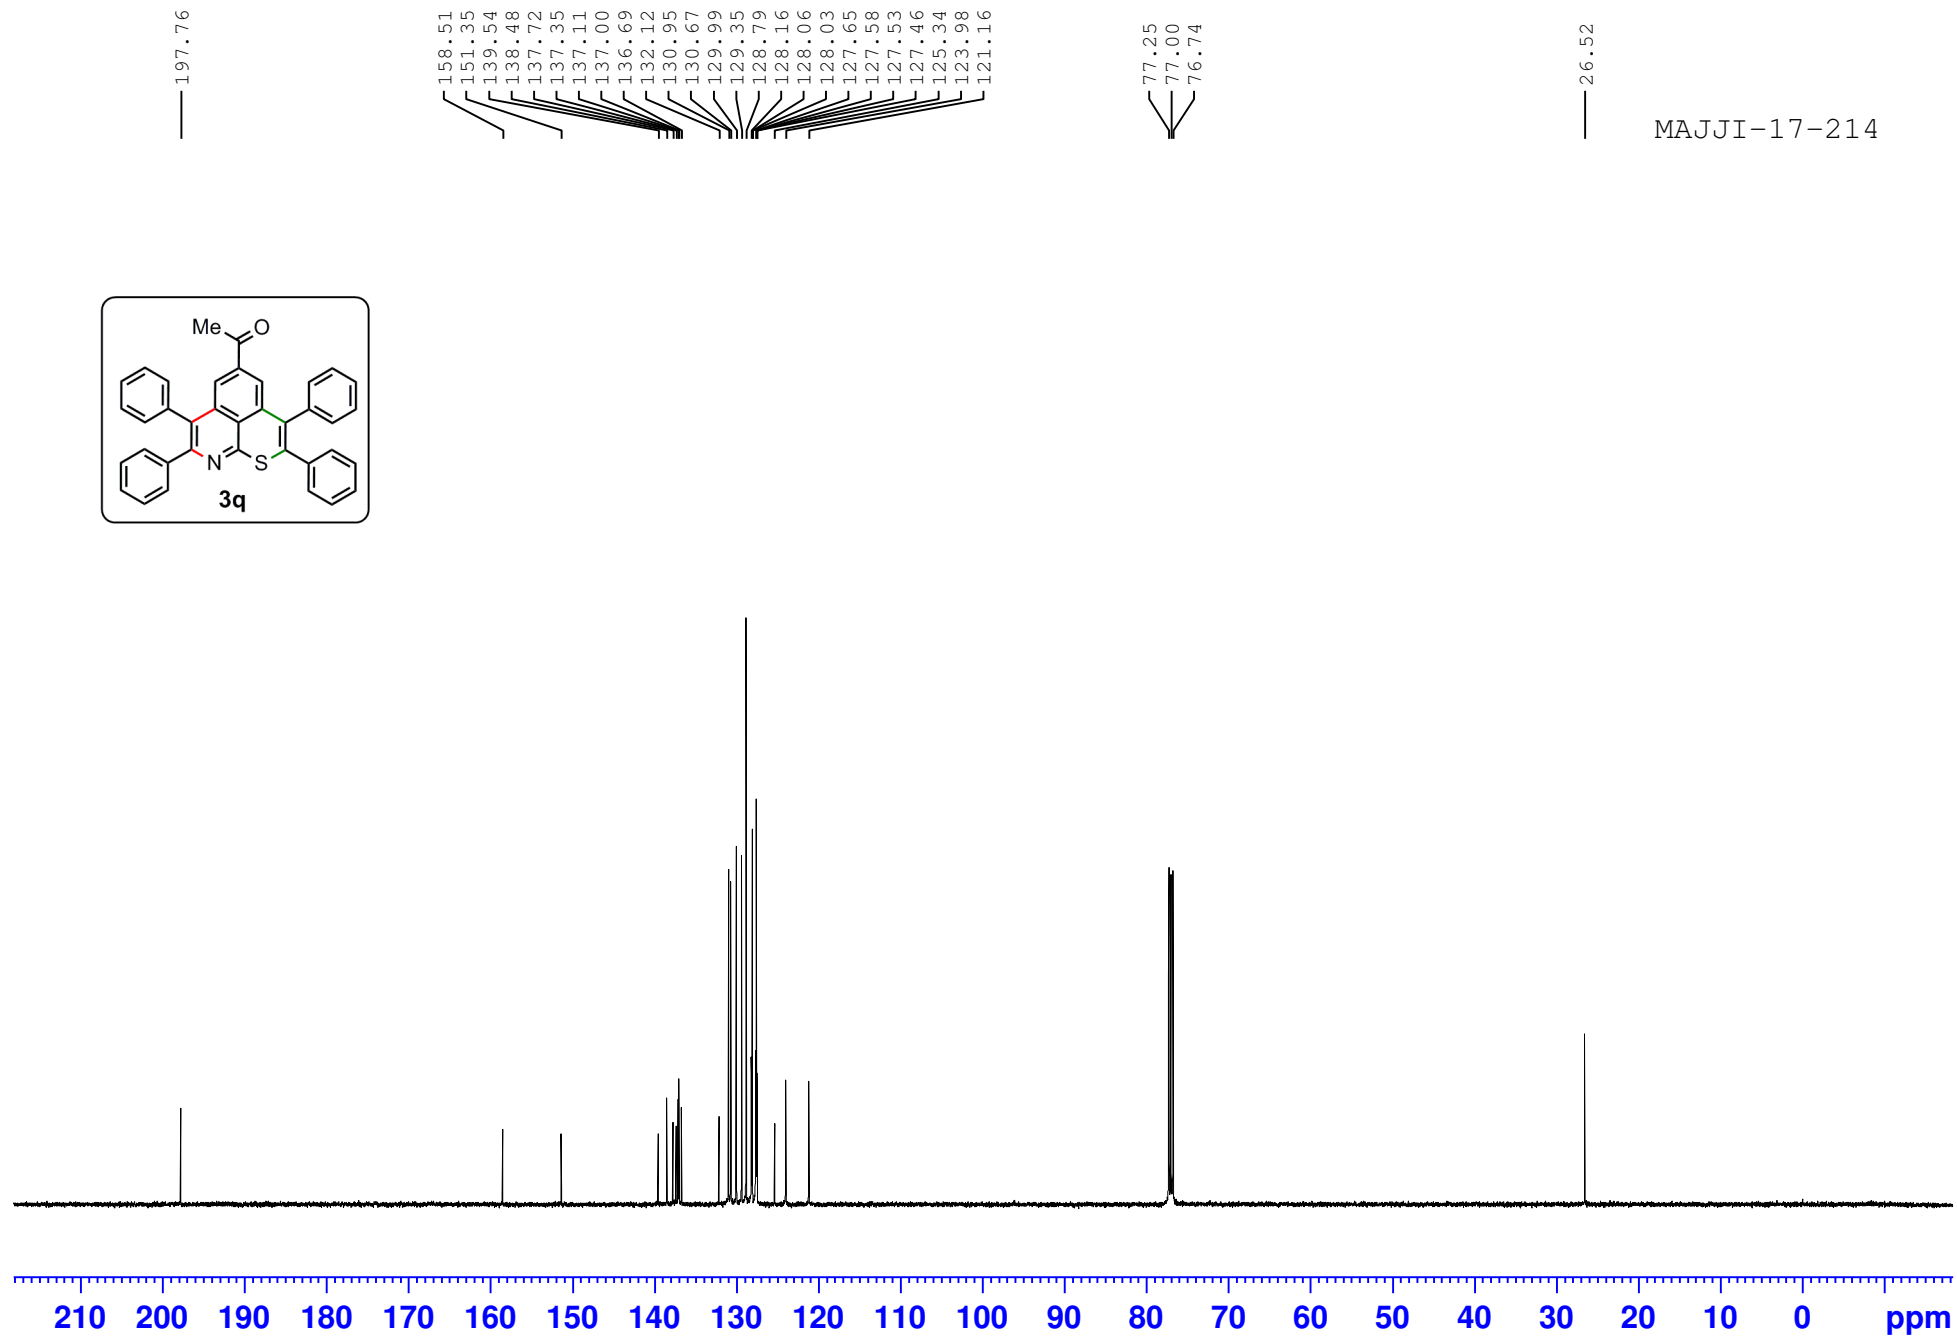

8.104  
8.097  
7.596  
7.582  
7.568  
7.334  
7.327  
7.296  
7.282  
7.260  
7.195  
7.180  
7.170  
7.135  
7.120  
7.105  
6.964  
6.961  
6.941  
6.930  
6.918  
6.778  
6.762  
6.614  
6.611

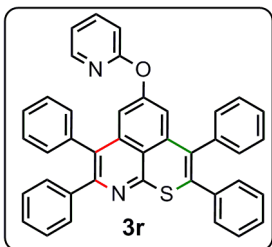

MJ-17-160

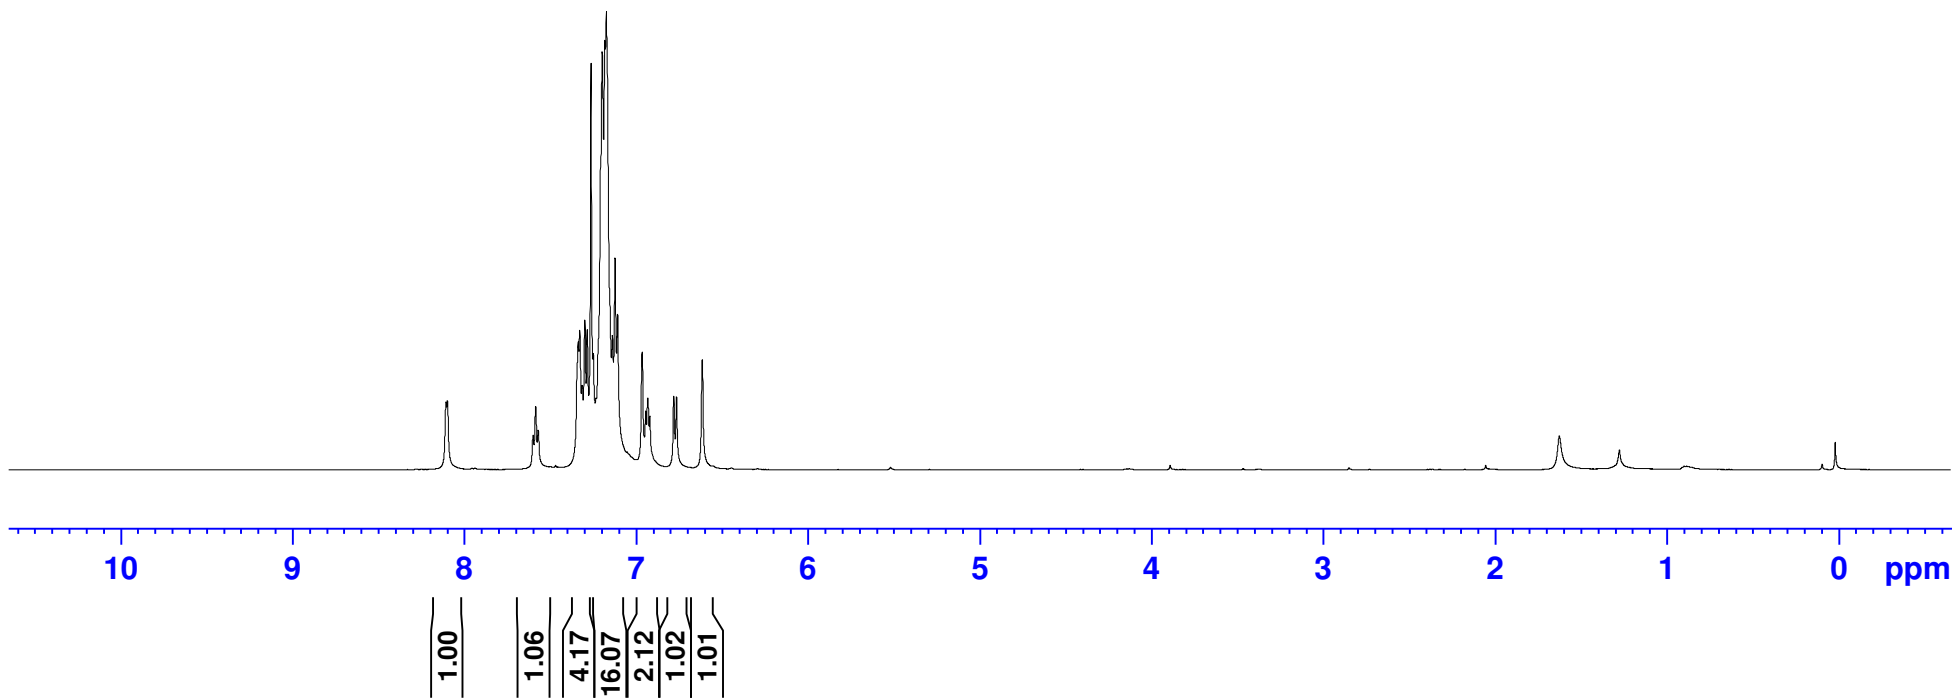

162.63  
158.11  
156.22  
151.09  
147.49  
140.02  
139.77  
139.34  
138.98  
137.40  
137.29  
137.21  
131.80  
131.03  
130.77  
130.03  
129.41  
128.57  
128.06  
128.02  
127.51  
127.24  
127.21  
126.86  
121.84  
118.86  
117.61  
113.08  
111.84

77.25  
77.00  
76.74

MJ-17-160

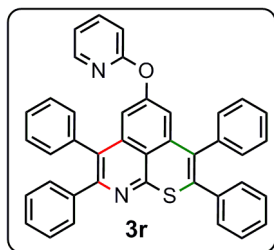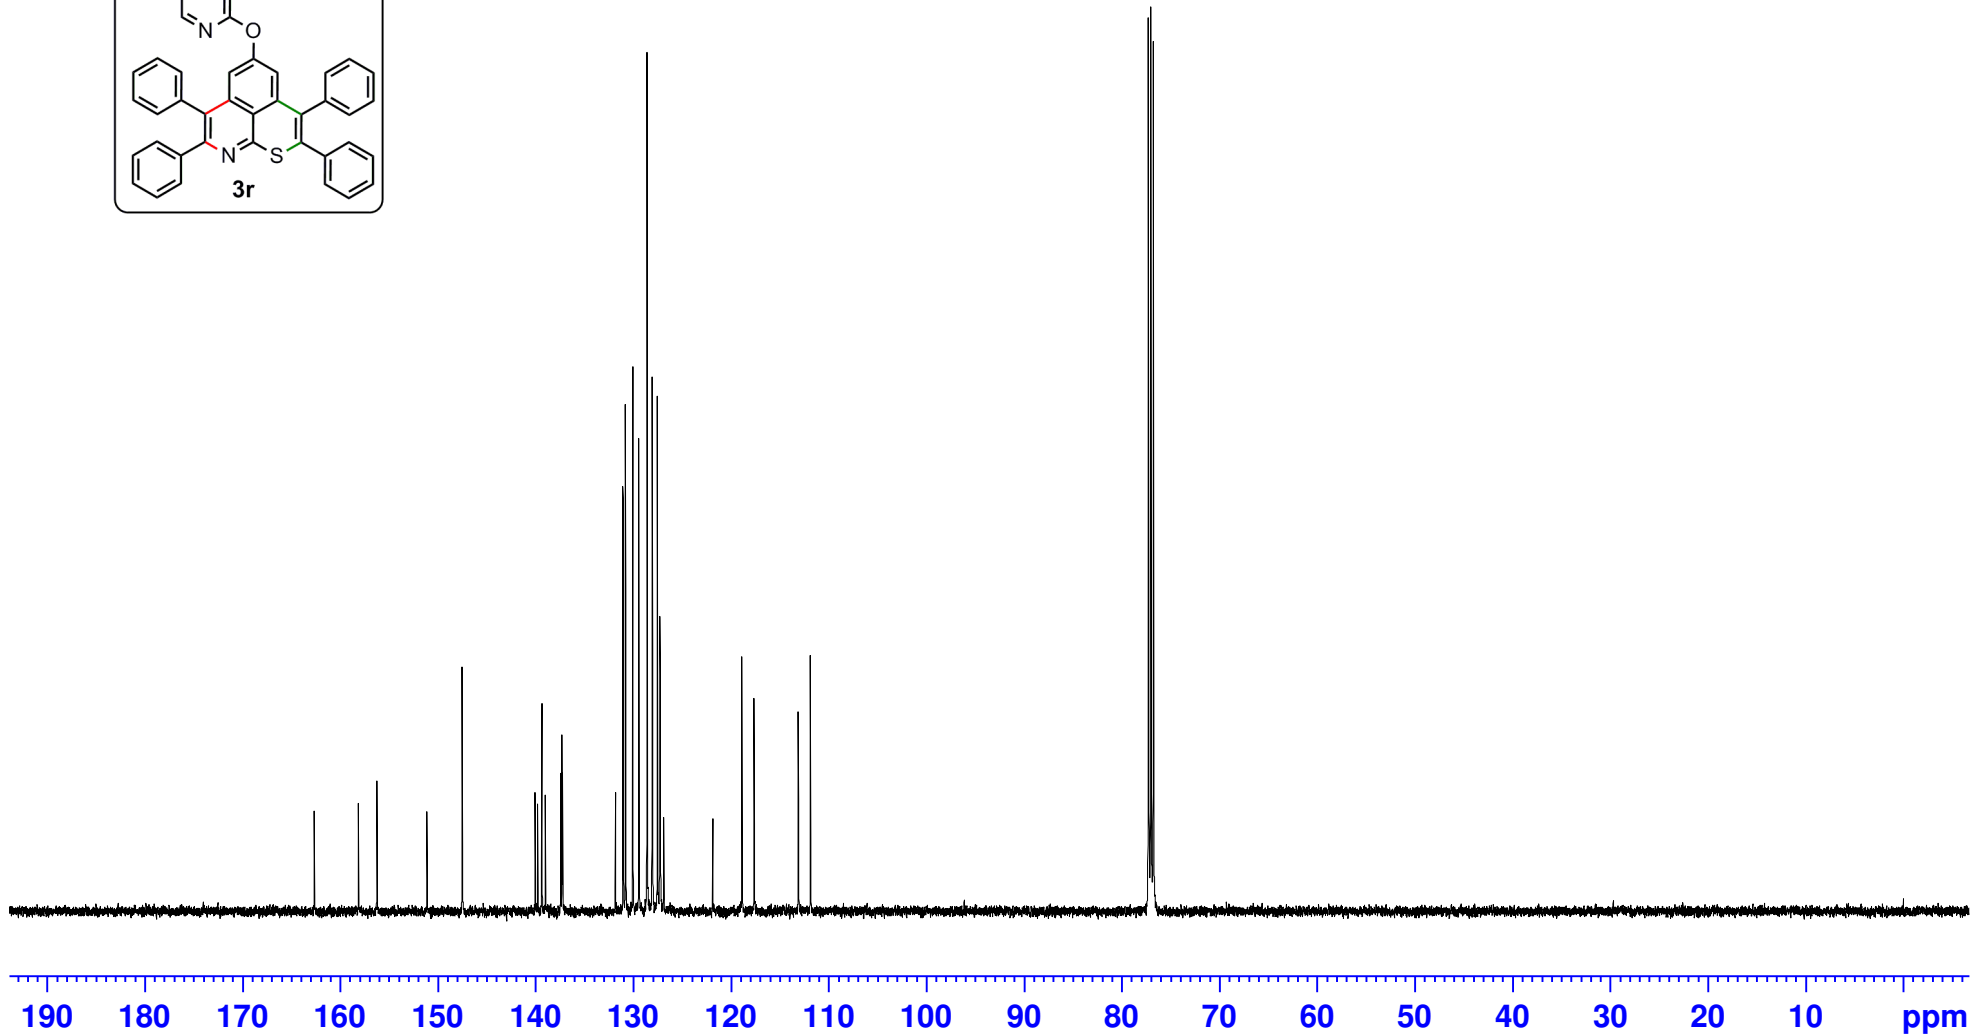

MAJJI-17-271 I

7.444  
7.412  
7.397  
7.383  
7.375  
7.327  
7.314  
7.270  
7.260  
7.246  
7.216  
7.211  
6.922  
6.905  
6.901  
6.847  
6.830

3.416  
3.275

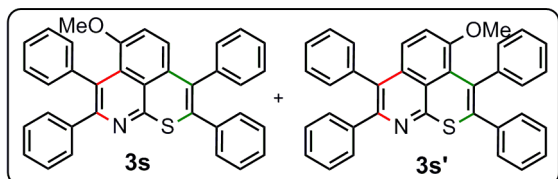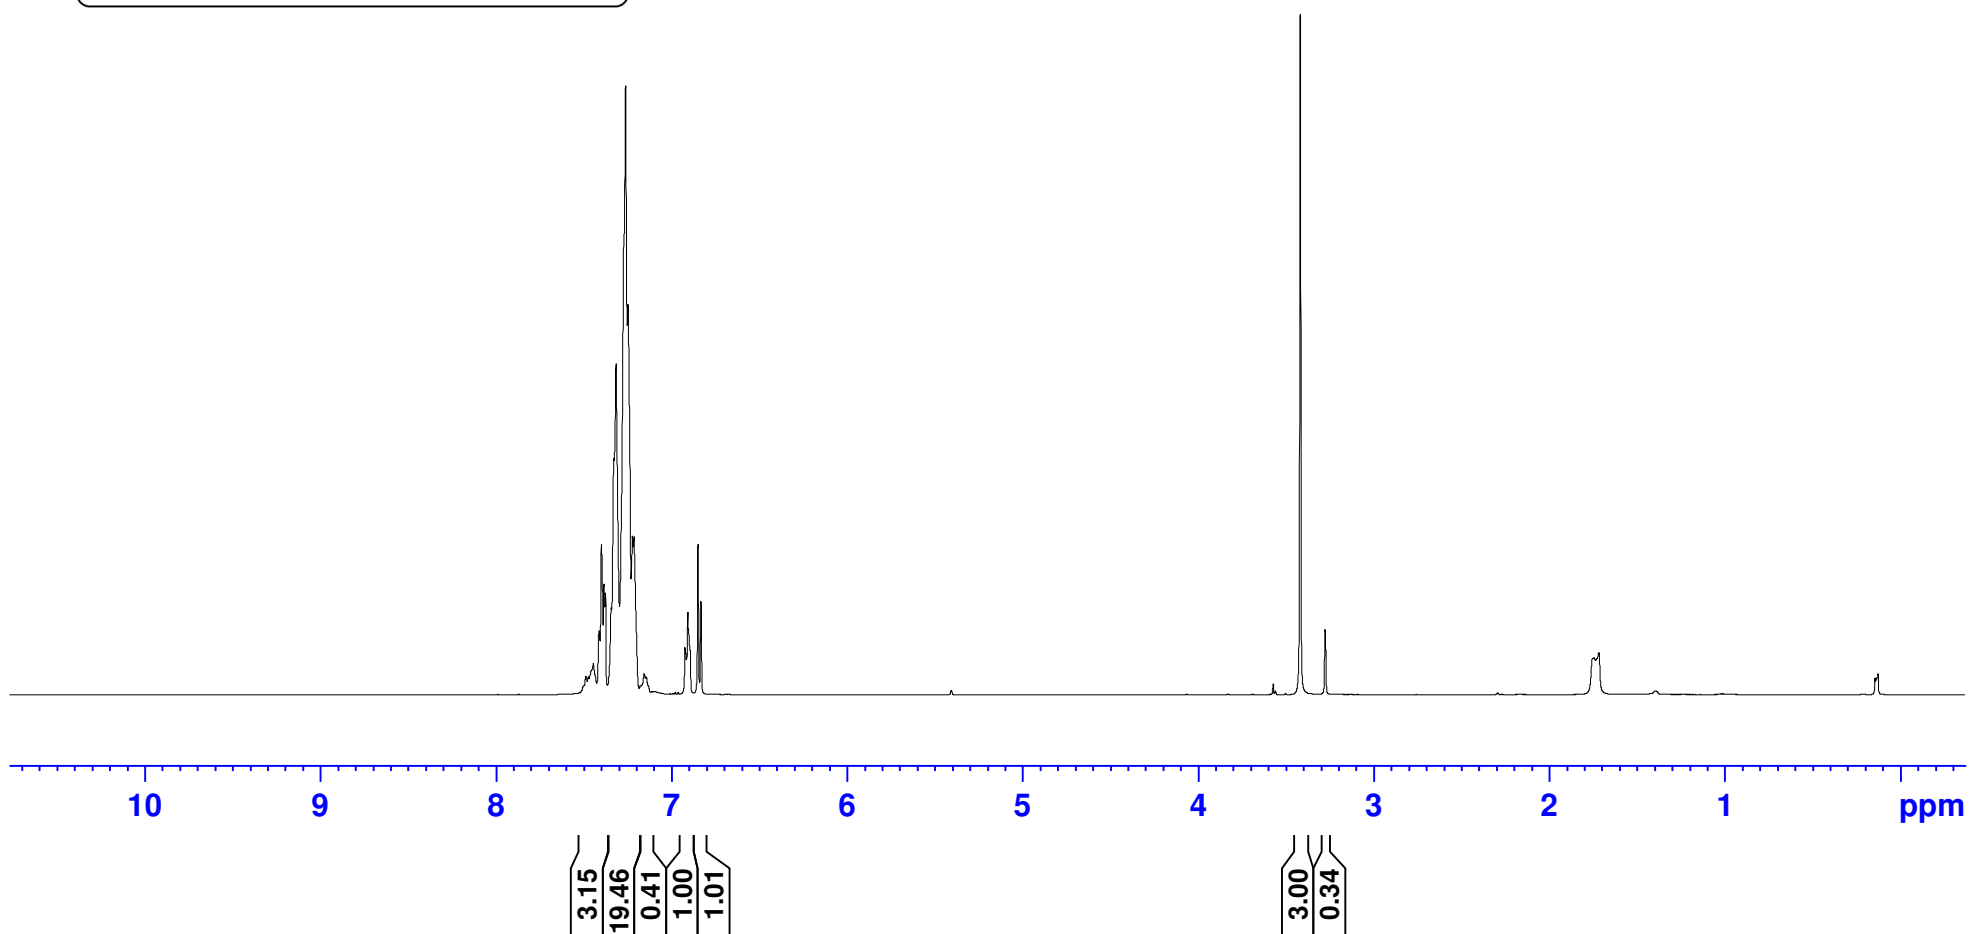

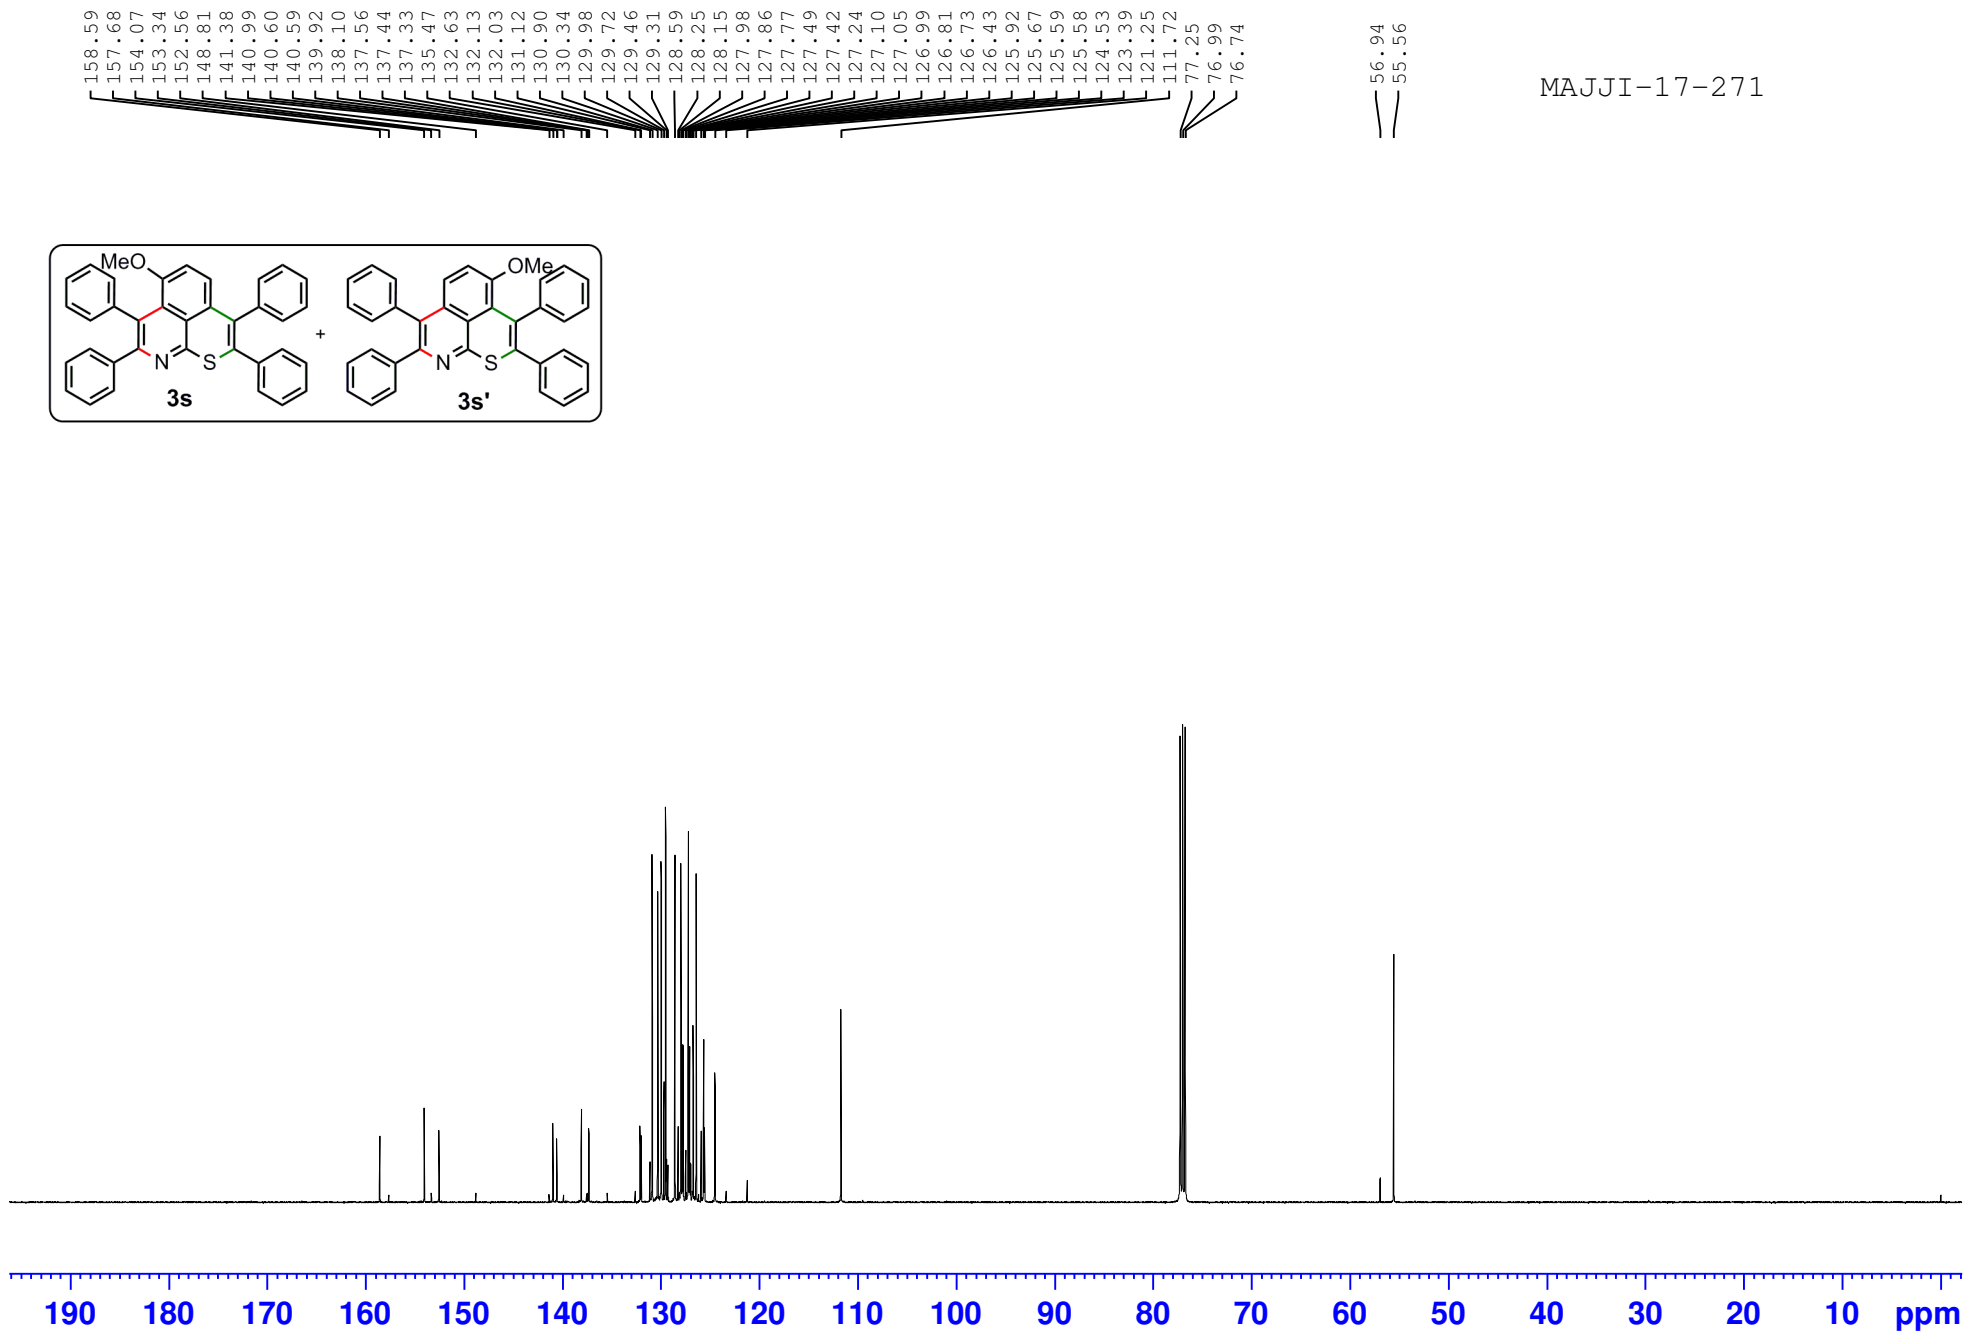



7.304  
7.289  
7.274  
7.260  
7.232  
7.222  
7.218  
7.202  
7.186  
7.182  
7.172  
7.166  
7.151  
7.125  
7.114  
7.107  
7.104  
7.042  
7.025  
7.010  
6.973  
6.963  
6.950  
6.869  
6.854  
6.840  
6.824  
6.306  
6.290

MAJJI-17-272 R

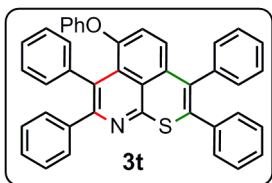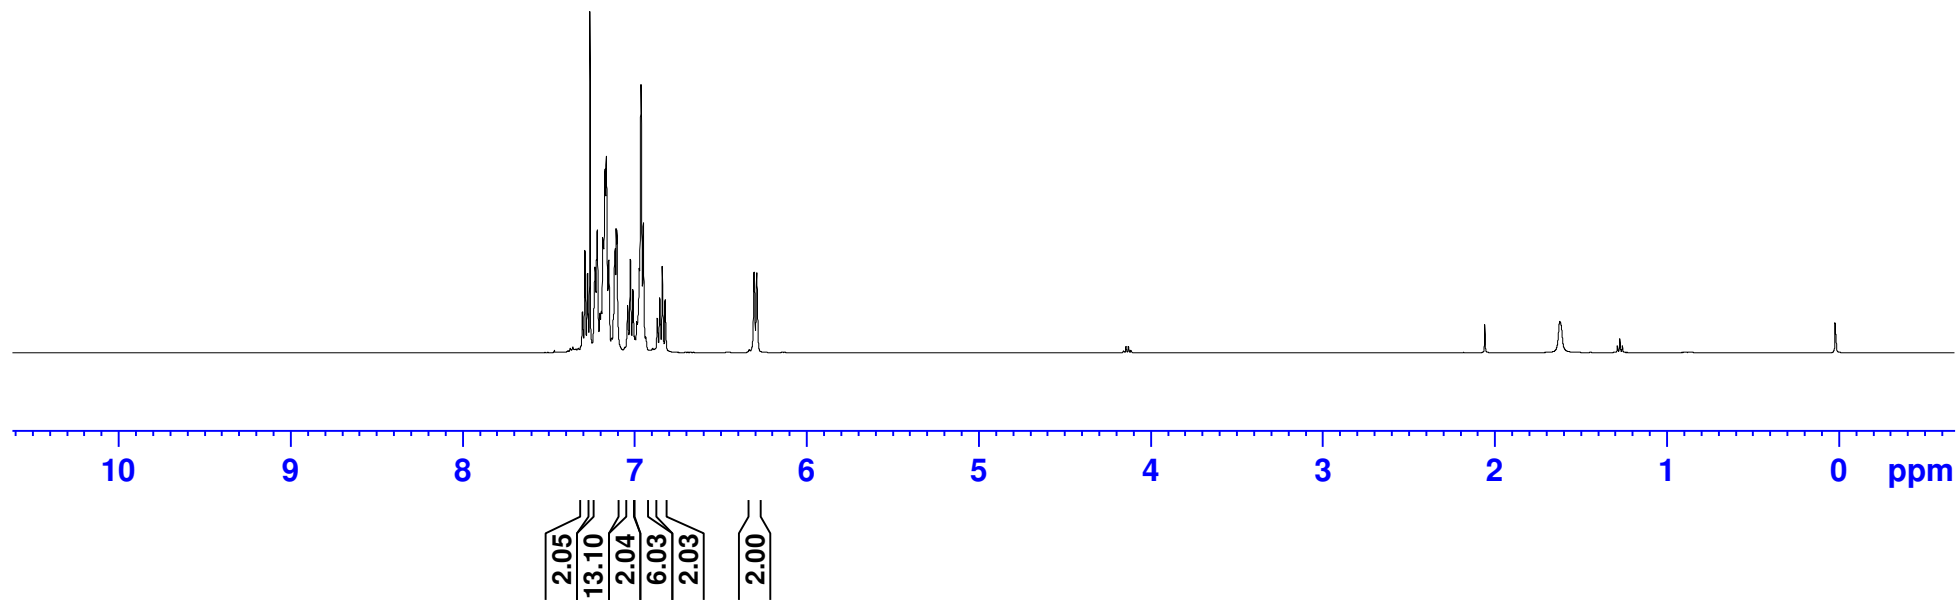

158.91  
157.51  
152.93  
149.09  
140.31  
139.23  
137.72  
137.09  
134.78  
133.58  
132.02  
130.85  
130.63  
130.42  
129.88  
129.45  
128.90  
128.70  
128.05  
128.01  
127.29  
127.23  
126.86  
126.59  
126.03  
124.78  
124.29  
123.44  
121.83  
116.12

77.25  
77.00  
76.74

MJ-17-272 R

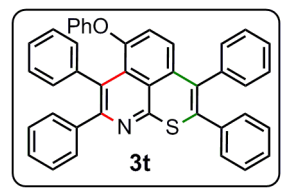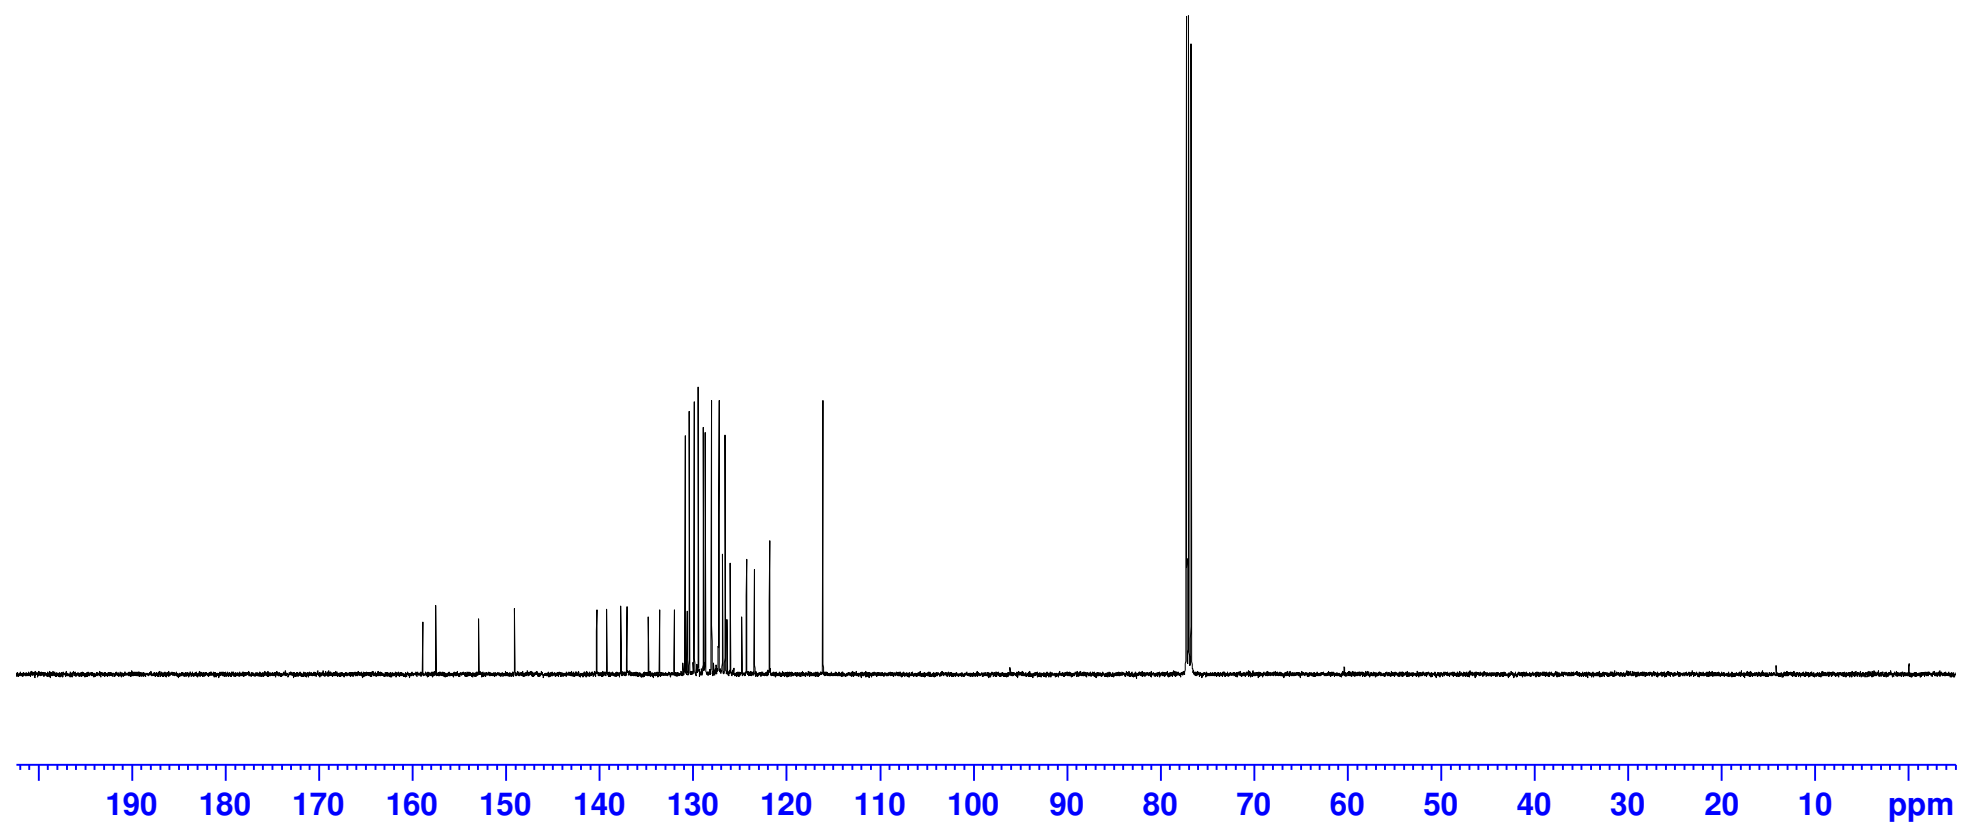

7.320  
7.306  
7.291  
7.260  
7.246  
7.208  
7.202  
7.196  
7.181  
7.160  
7.118  
7.104  
6.983

— 3.029

MAJJI-17-308

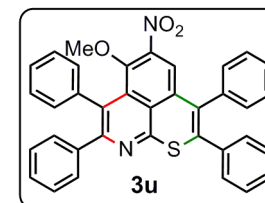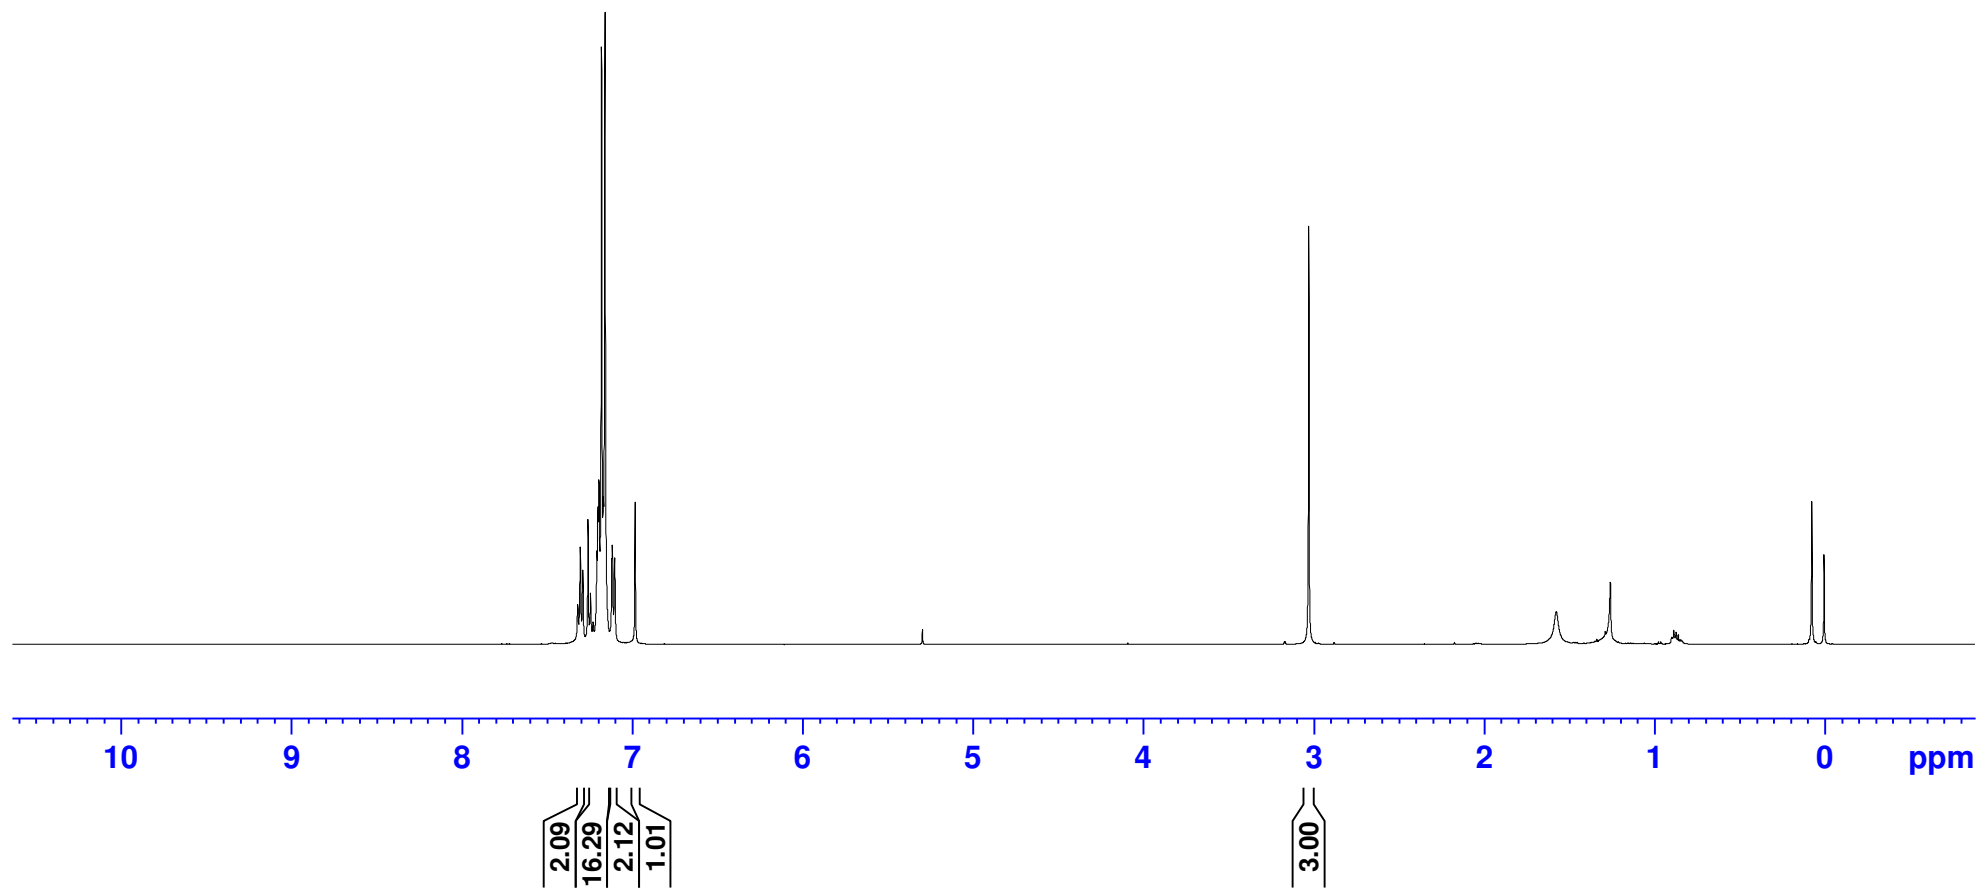

MAJJI-17-308

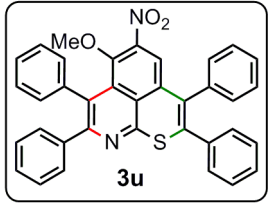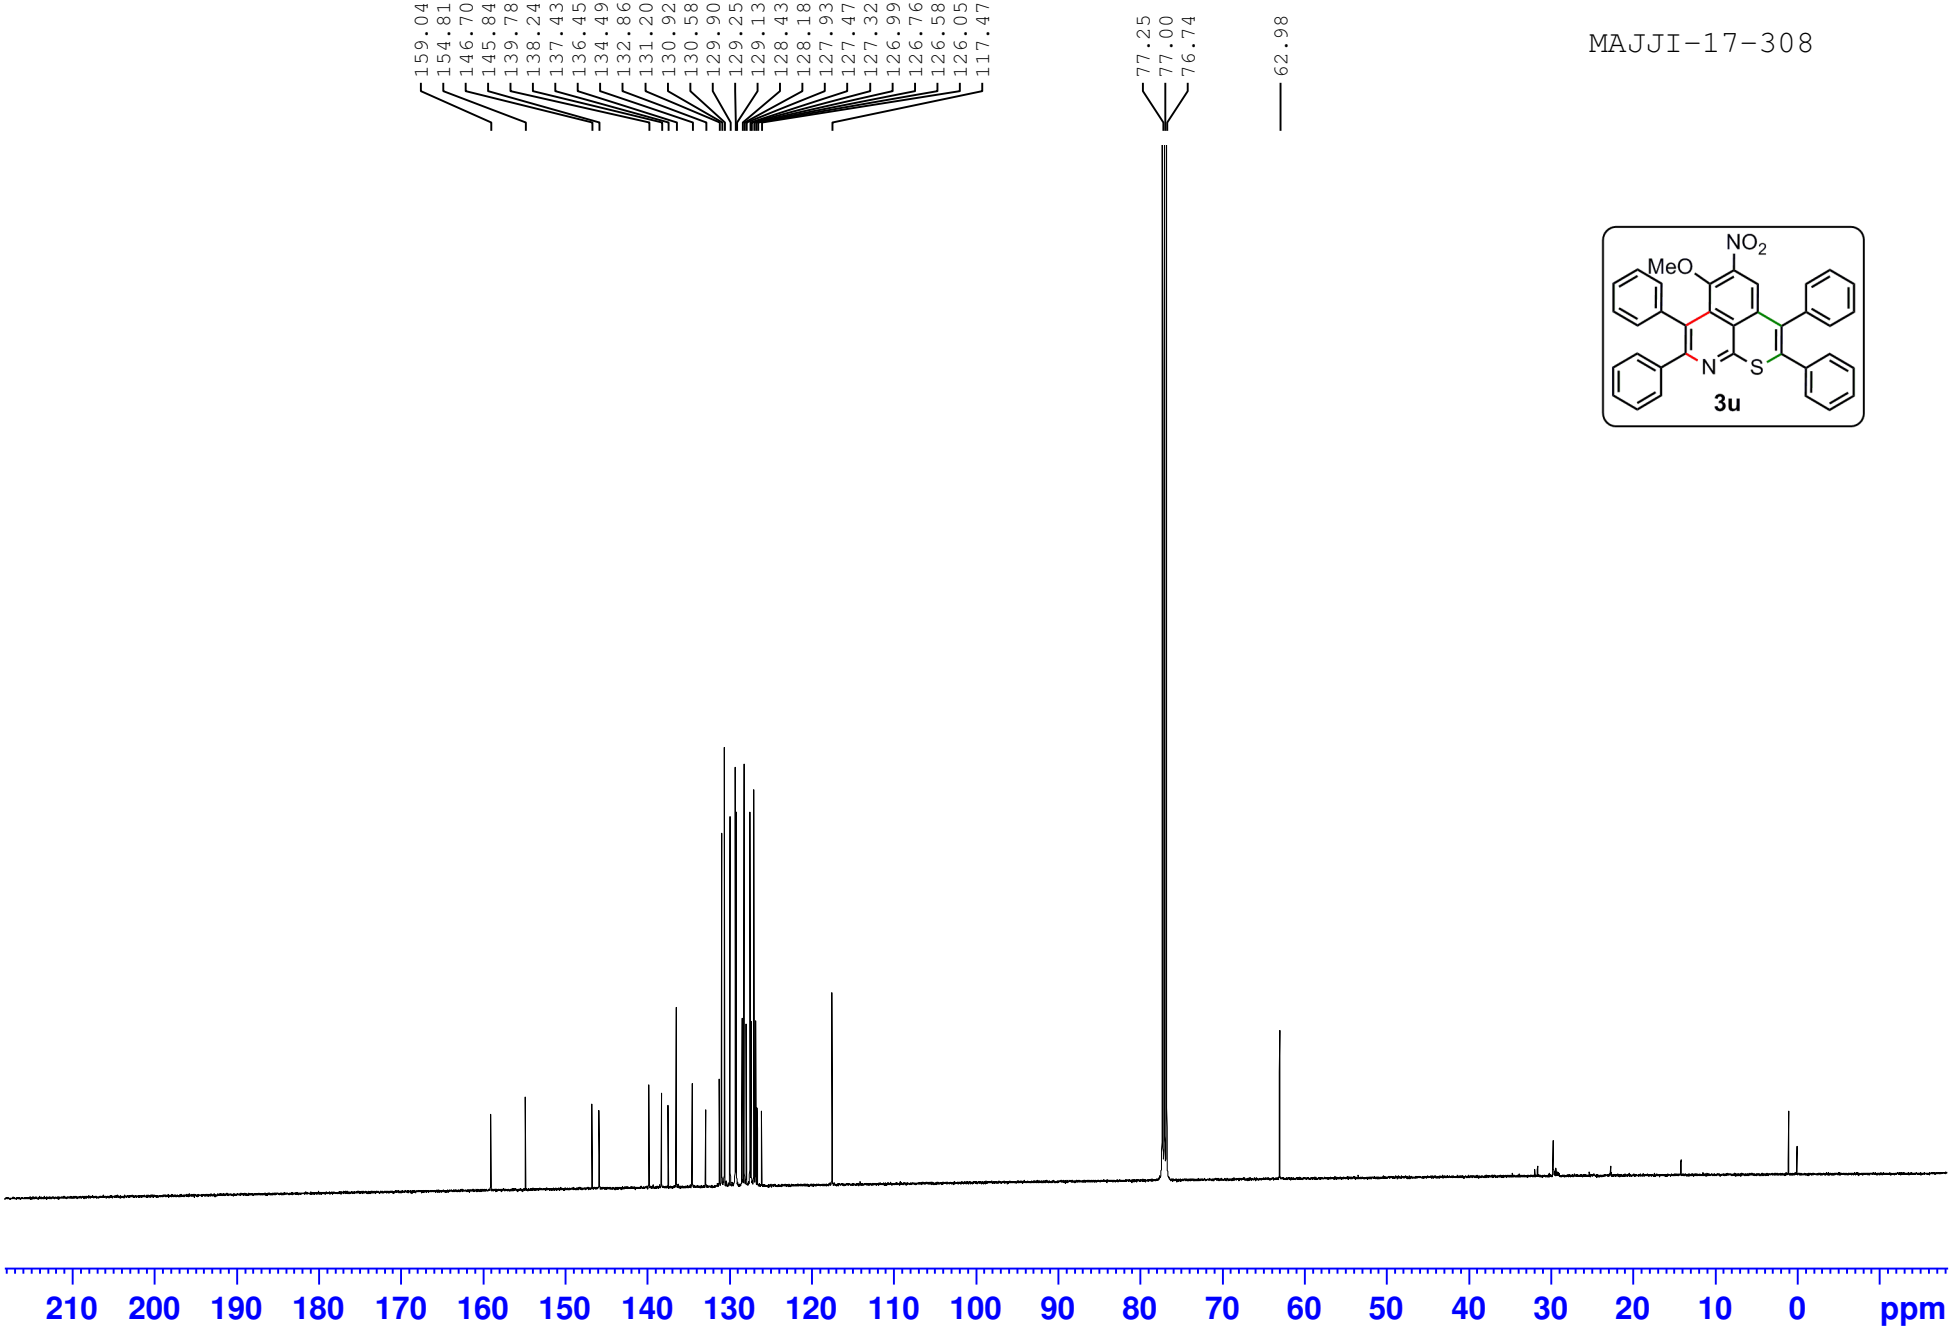

7.431  
7.426  
7.409  
7.391  
7.366  
7.357  
7.350  
7.333  
7.322  
7.310  
7.289  
7.276  
7.247  
7.230  
7.223  
7.214  
7.206  
7.194  
7.189  
7.167  
7.163  
7.148  
7.143  
7.115  
7.092  
7.084  
7.061  
7.022  
7.001  
6.991  
6.970  
6.831  
6.820  
6.810  
6.798

majji-17-283 R

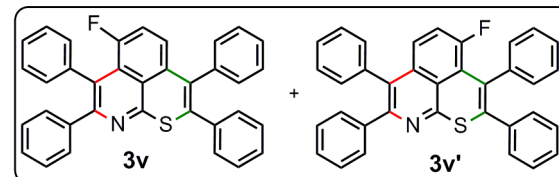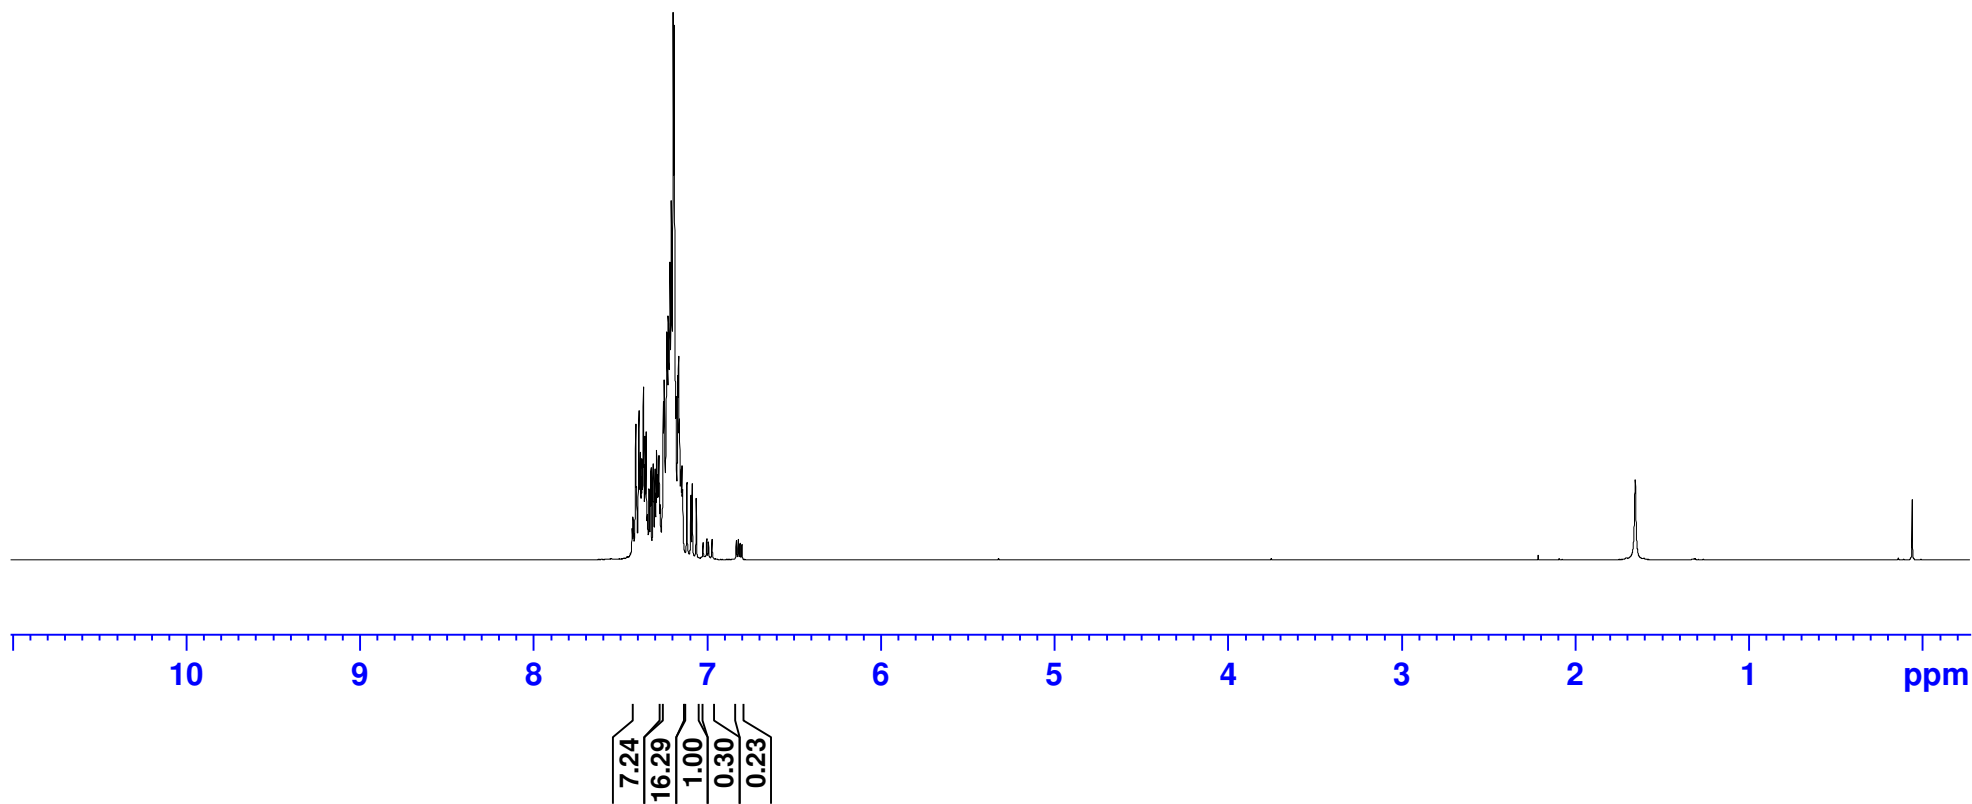

158.93  
158.90  
157.78  
157.73  
157.42  
156.83  
154.86  
154.30  
152.63  
149.96  
149.94  
139.82  
139.58  
139.37  
139.32  
138.99  
138.95  
137.60  
137.50  
136.99  
136.92  
136.85  
134.74  
134.67  
133.30  
133.25  
131.84  
131.00  
130.77  
130.45  
130.41  
129.96  
129.92  
129.79  
129.75  
129.41  
129.37  
128.73  
128.05  
127.96  
127.89  
127.66  
127.64  
127.55  
127.48  
127.41  
127.35  
127.31  
127.17  
127.08  
127.07  
126.77  
126.54  
125.82  
125.73  
125.43  
125.40  
124.01  
123.94  
123.31  
122.41  
122.14  
121.35  
121.28  
117.01  
116.79  
77.31  
77.00  
76.68

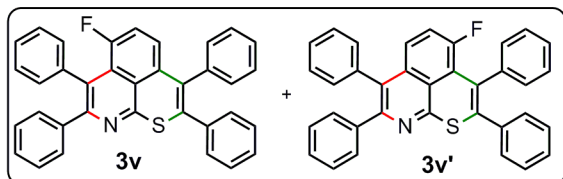

majji-17-283 R

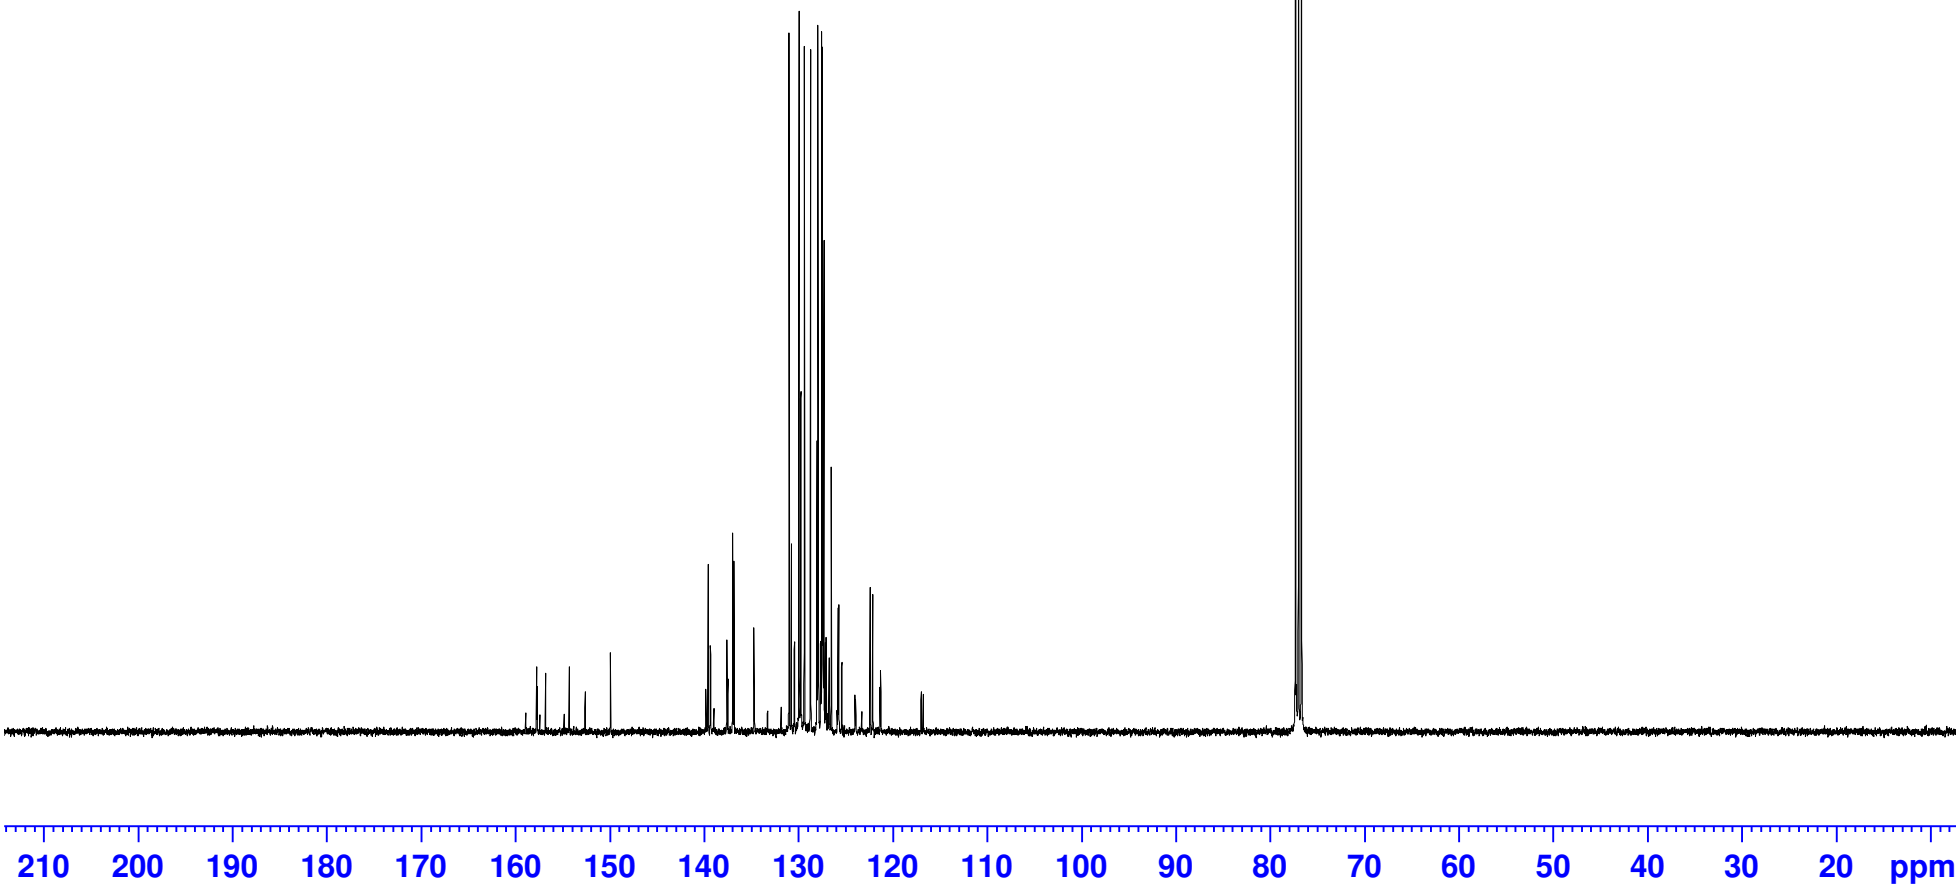

majji-17-283

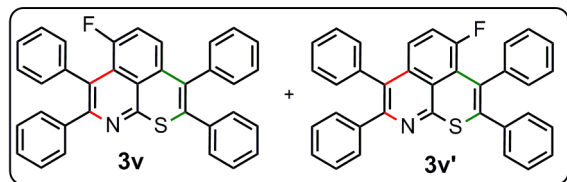

-105.56

-107.35

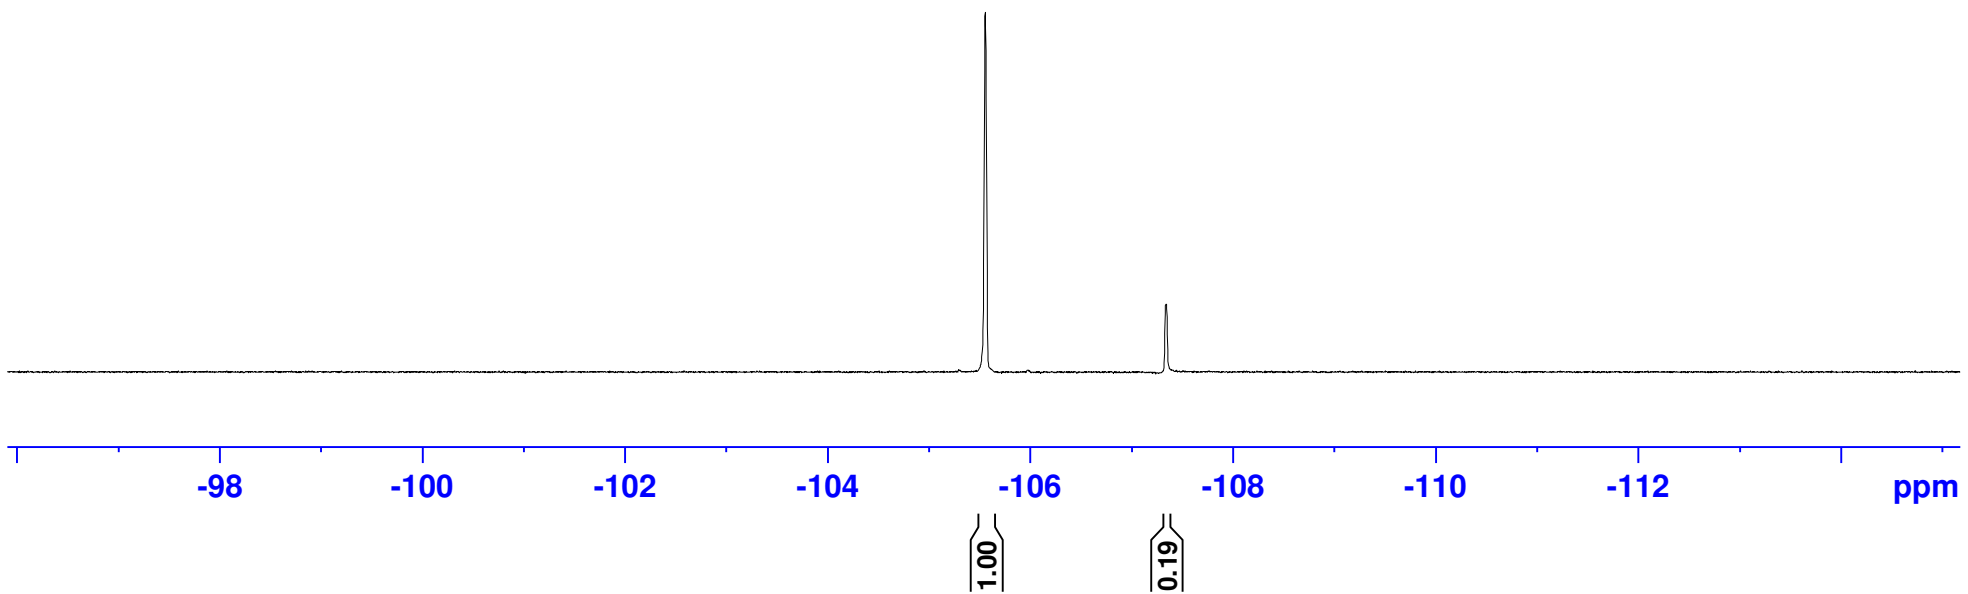

MAJJI-17-270

7.406  
7.393  
7.379  
7.368  
7.355  
7.348  
7.335  
7.312  
7.309  
7.307  
7.303  
7.300  
7.293  
7.260  
7.188  
7.181  
7.179  
7.174  
7.163  
7.135  
7.128  
7.127  
7.119  
7.115  
7.109  
7.106  
7.094  
6.811  
6.799

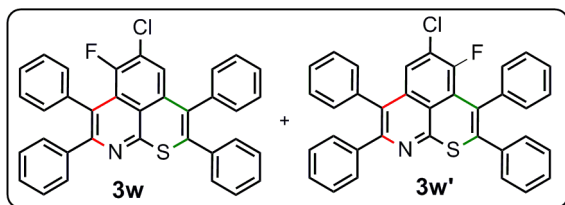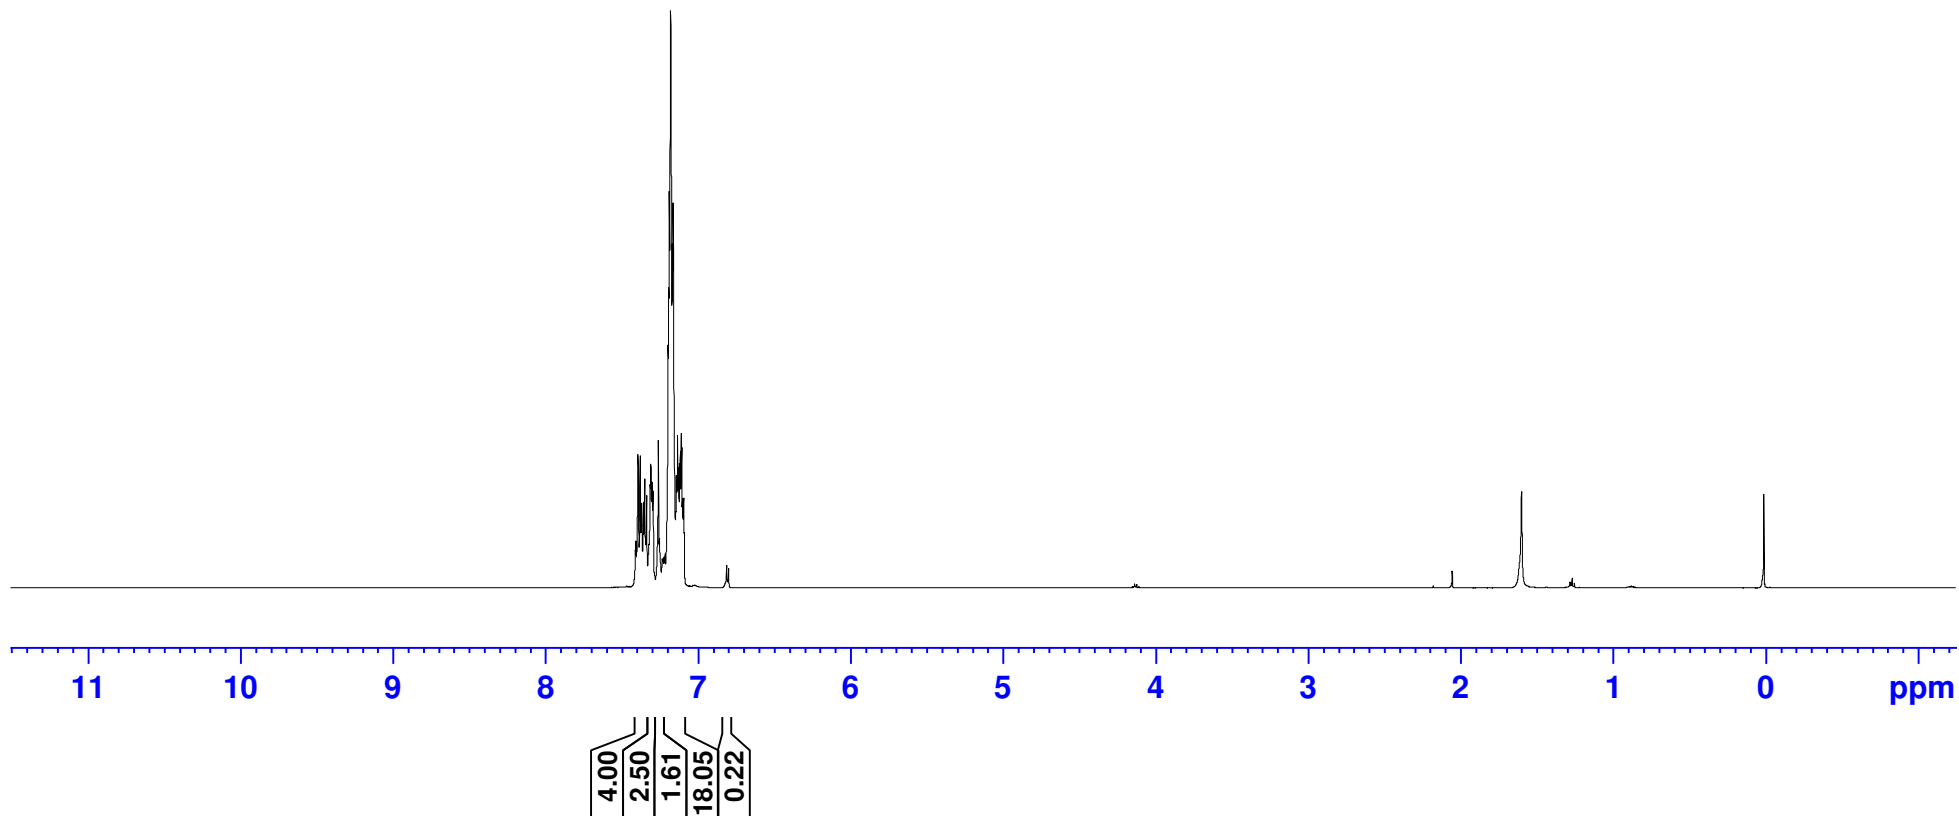



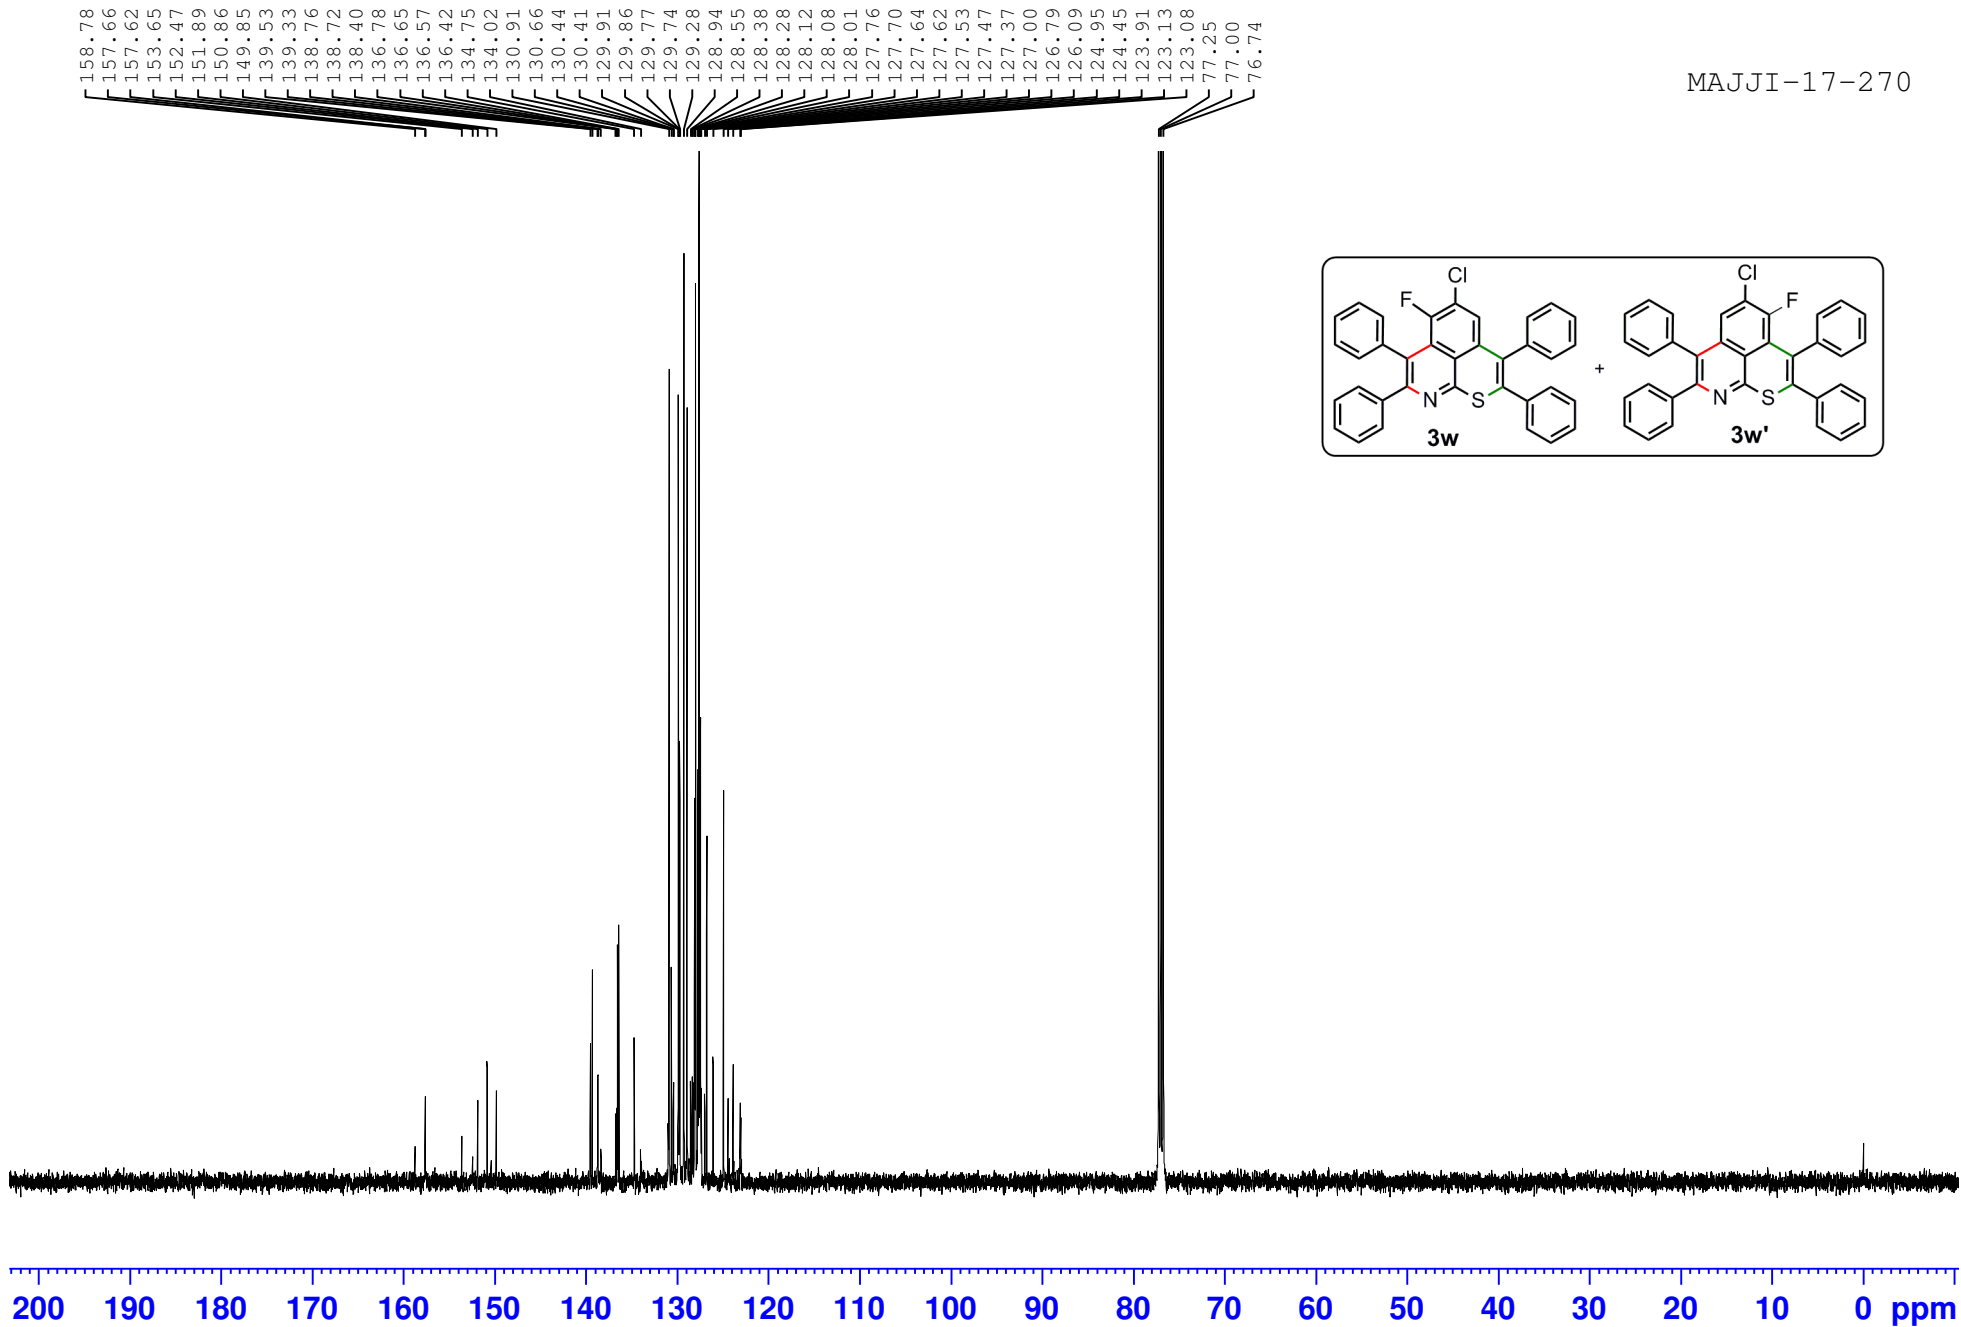

MAJJI-17-270

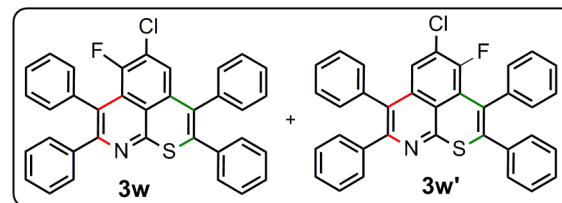

MJ-17-270

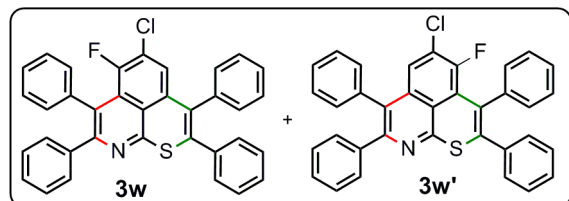

-108.63  
-109.87

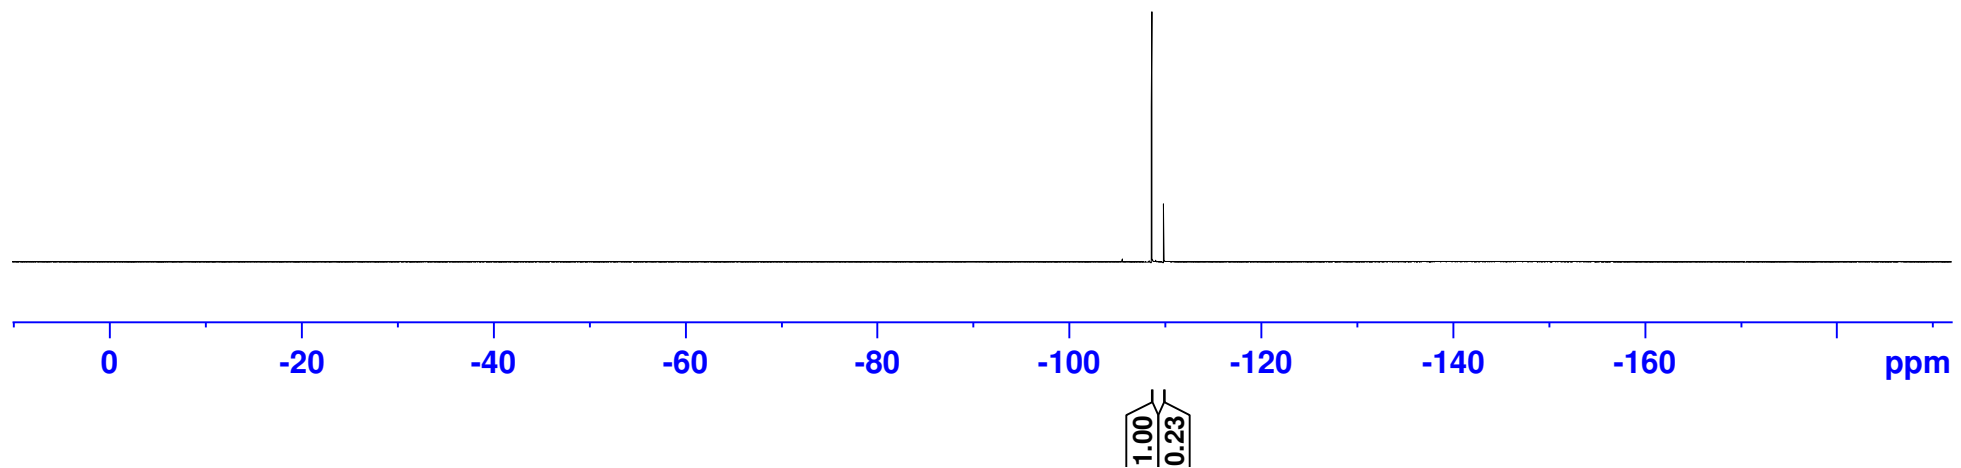

majji-17-284 RR

7.546  
7.531  
7.416  
7.400  
7.382  
7.377  
7.361  
7.326  
7.314  
7.311  
7.302  
7.273  
7.260  
7.250  
7.196  
7.189  
7.185  
7.165  
7.144  
7.135  
7.125  
7.118  
7.113  
6.969  
6.954

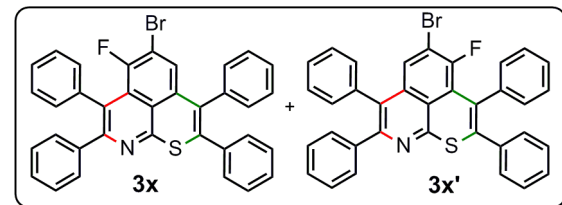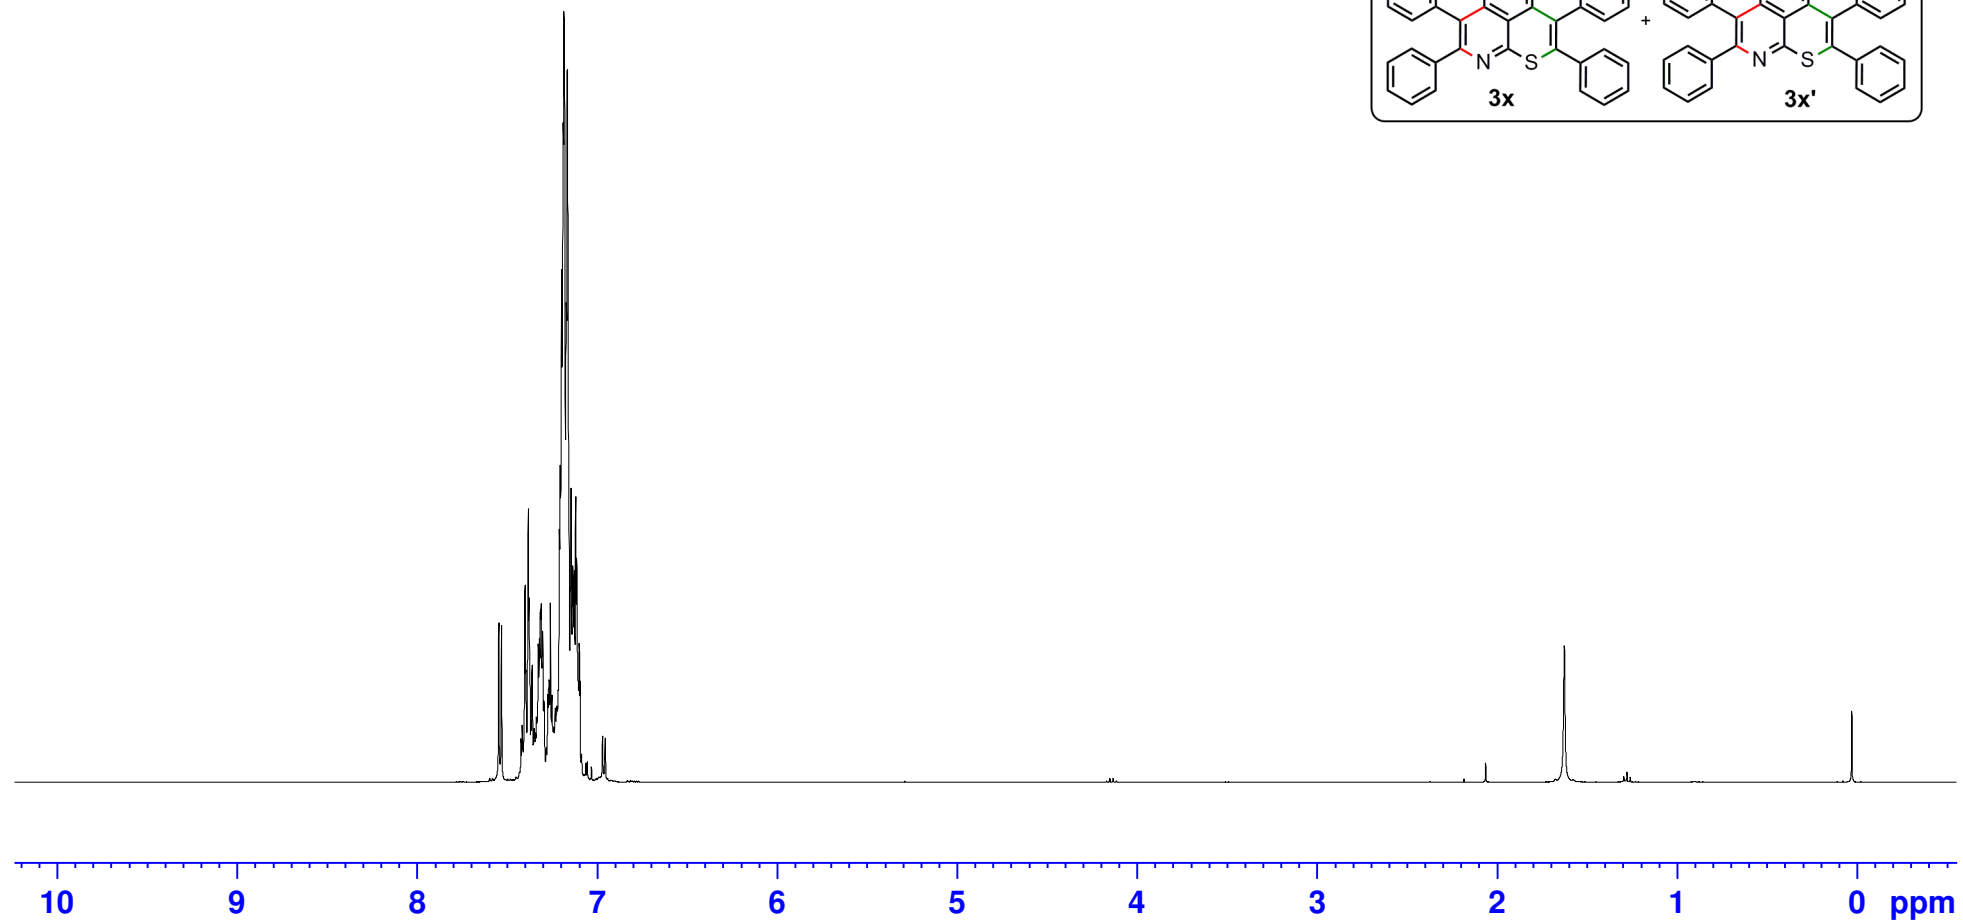

1.00  
3.10  
3.46  
18.36  
0.27

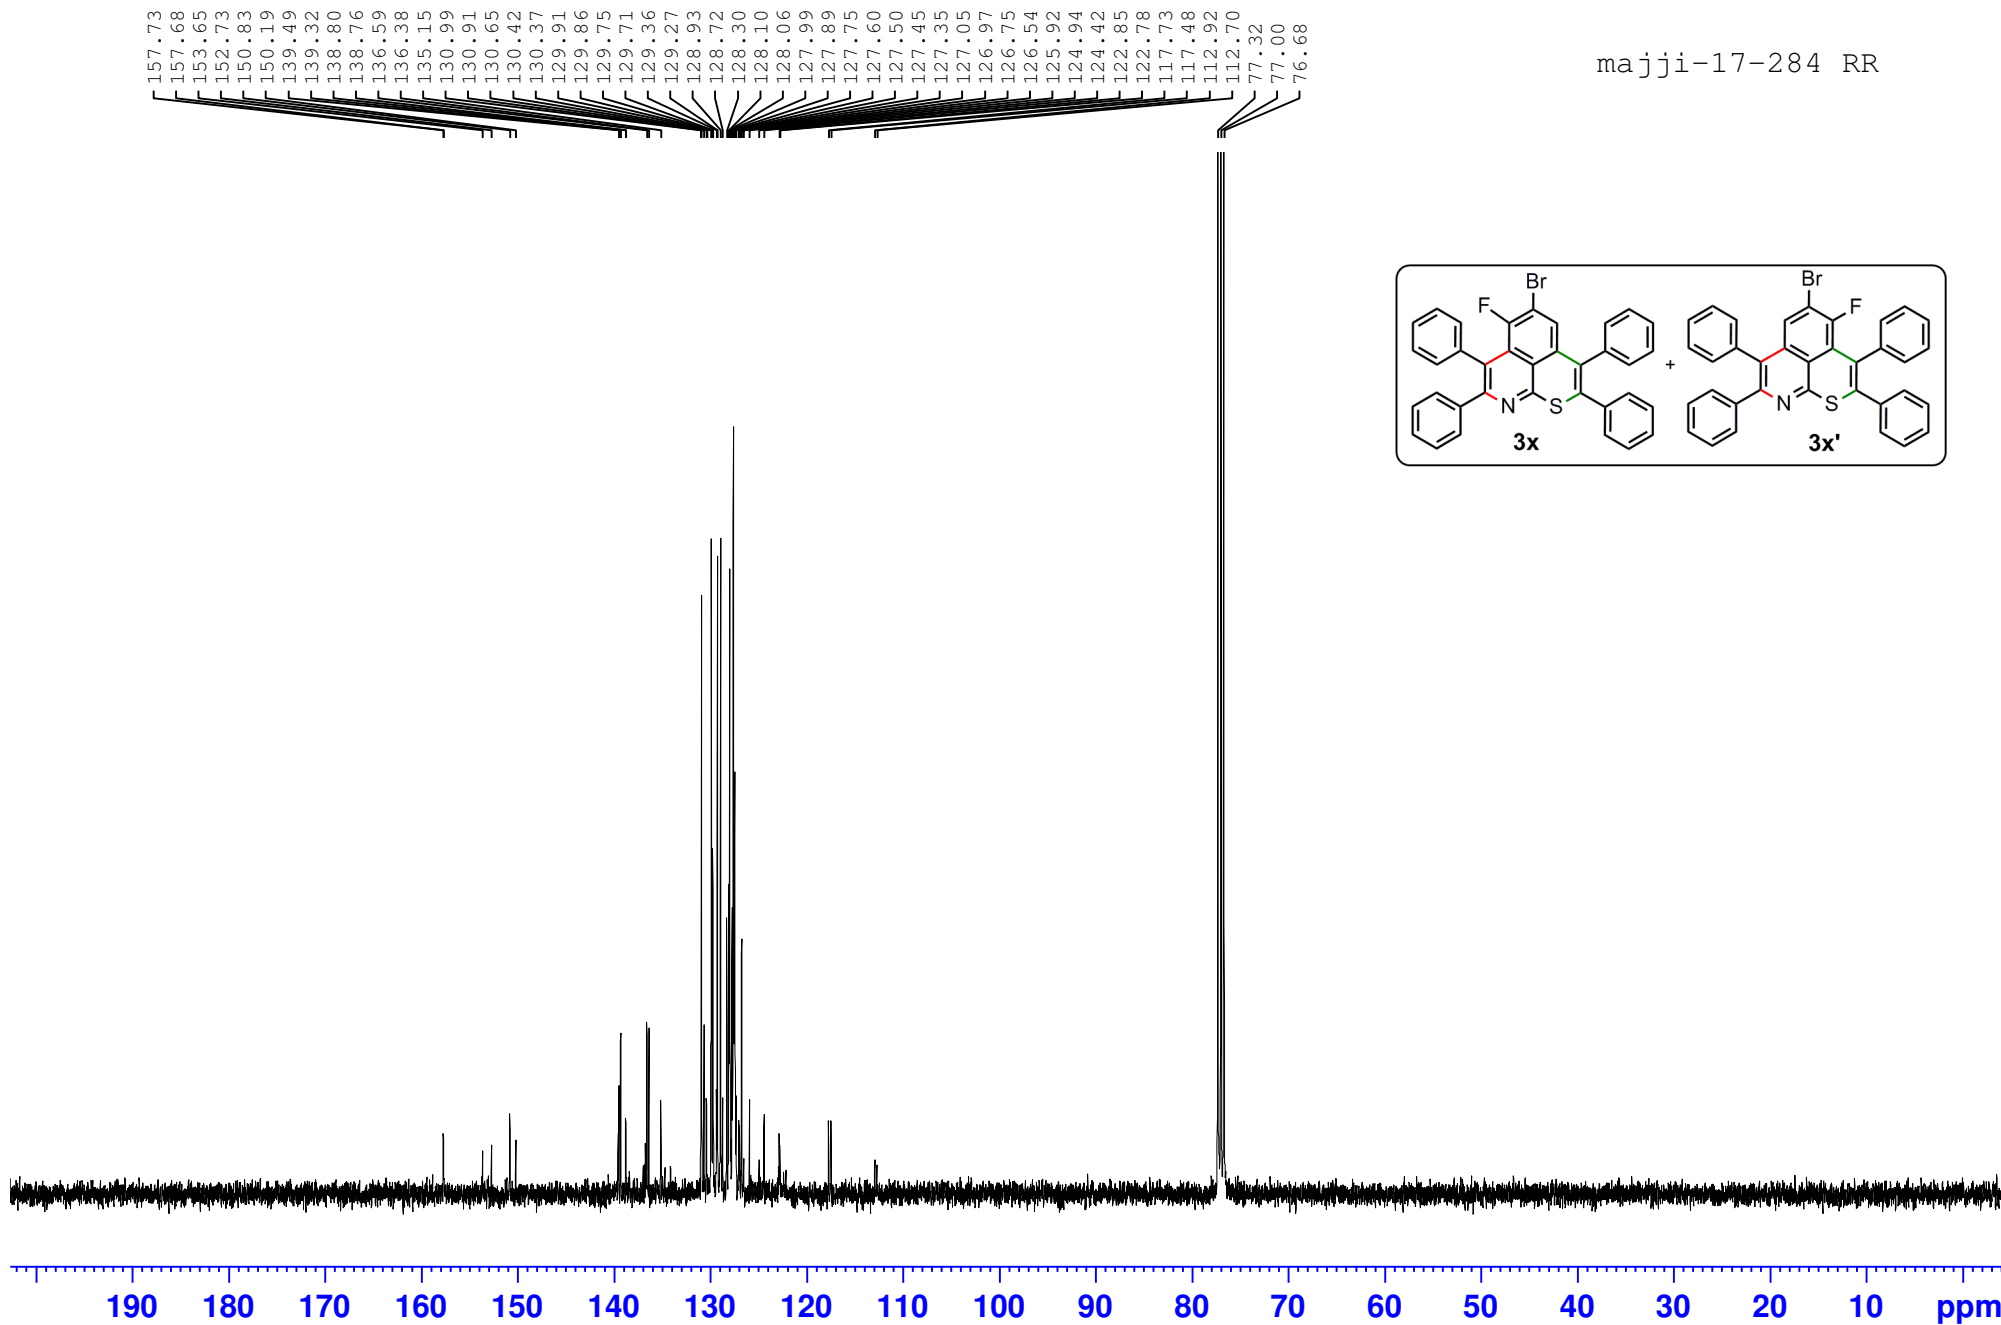

majji-17-284 RR

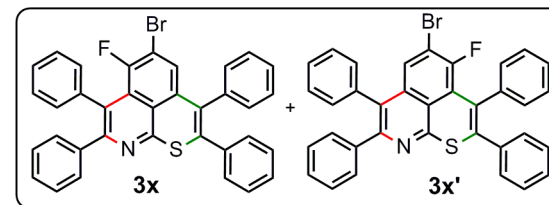

MJ-17-284

-99.67

-100.47

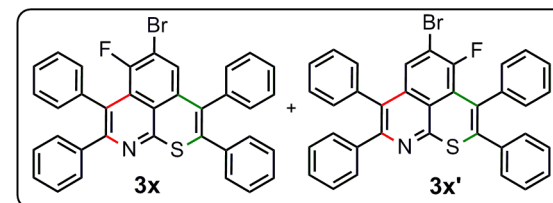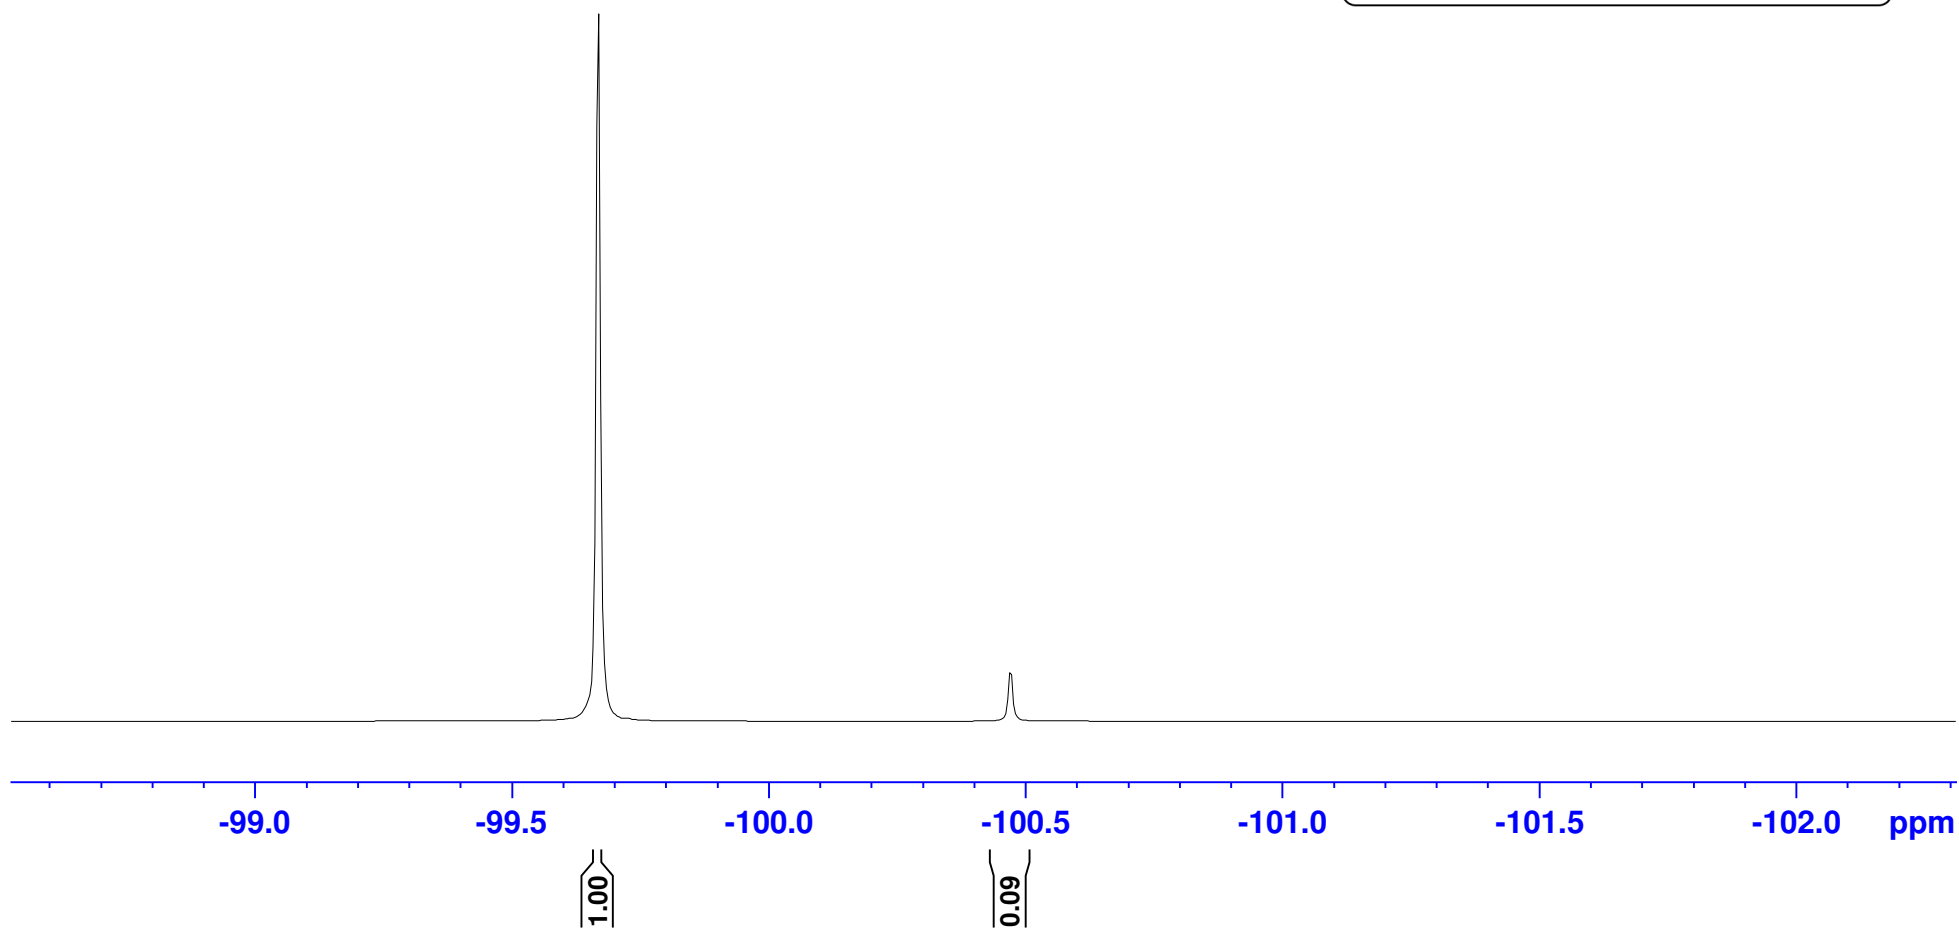

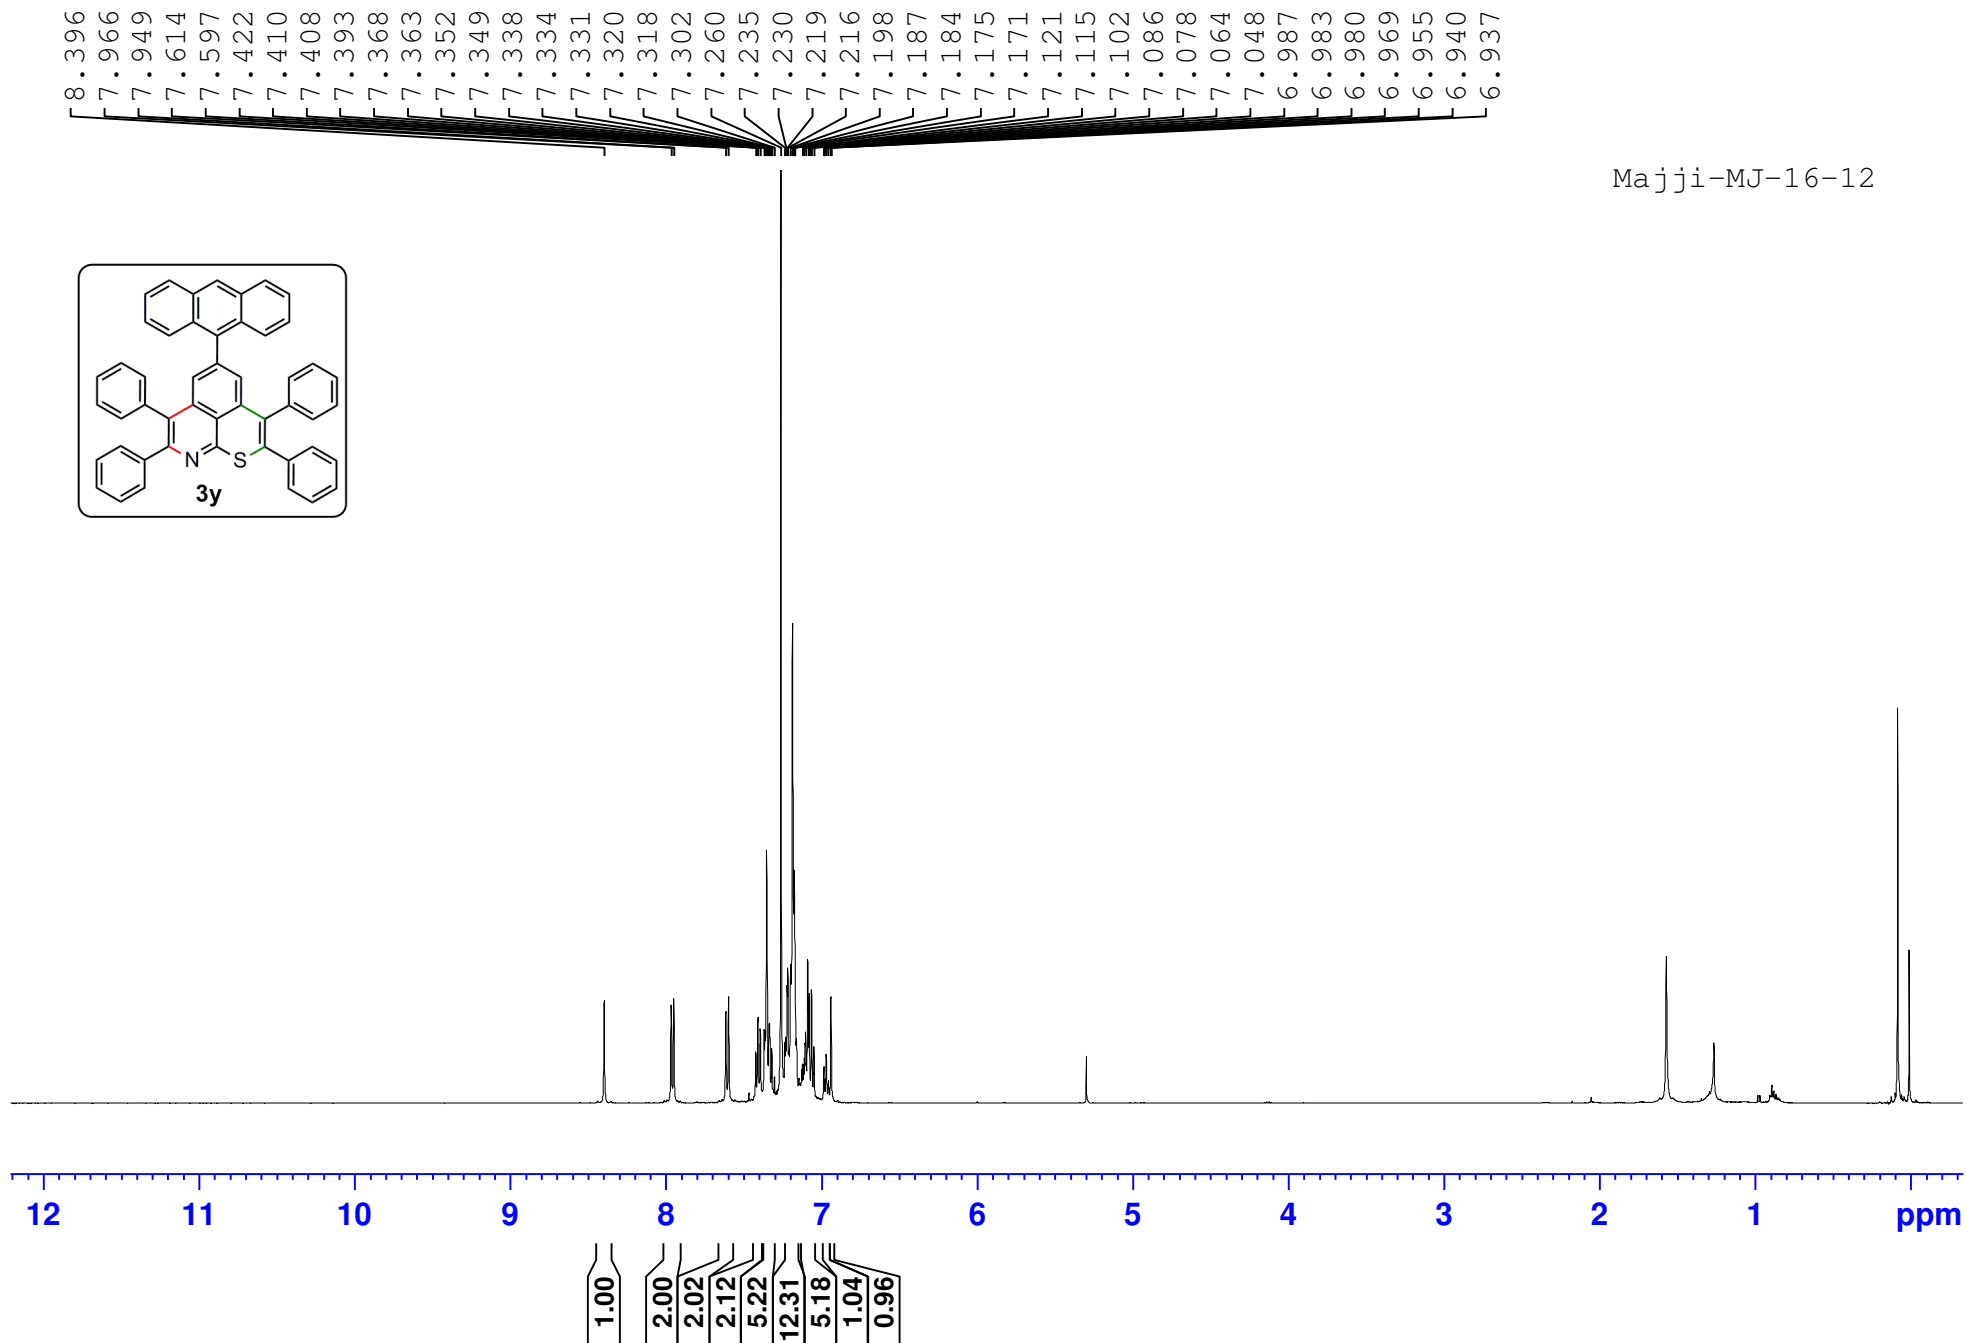

Majji-MJ-16-12

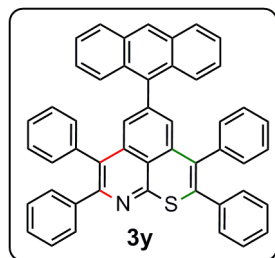

158.53  
151.30  
141.88  
140.15  
137.92  
137.43  
137.15  
136.88  
136.73  
135.96  
132.15  
131.17  
130.99  
130.64  
130.07  
129.71  
129.44  
128.59  
128.58  
128.31  
128.06  
128.02  
127.56  
127.27  
127.17  
127.15  
126.89  
126.74  
126.27  
125.82  
125.54  
125.07  
123.58

77.25  
77.00  
76.74

MAJJI-16-12

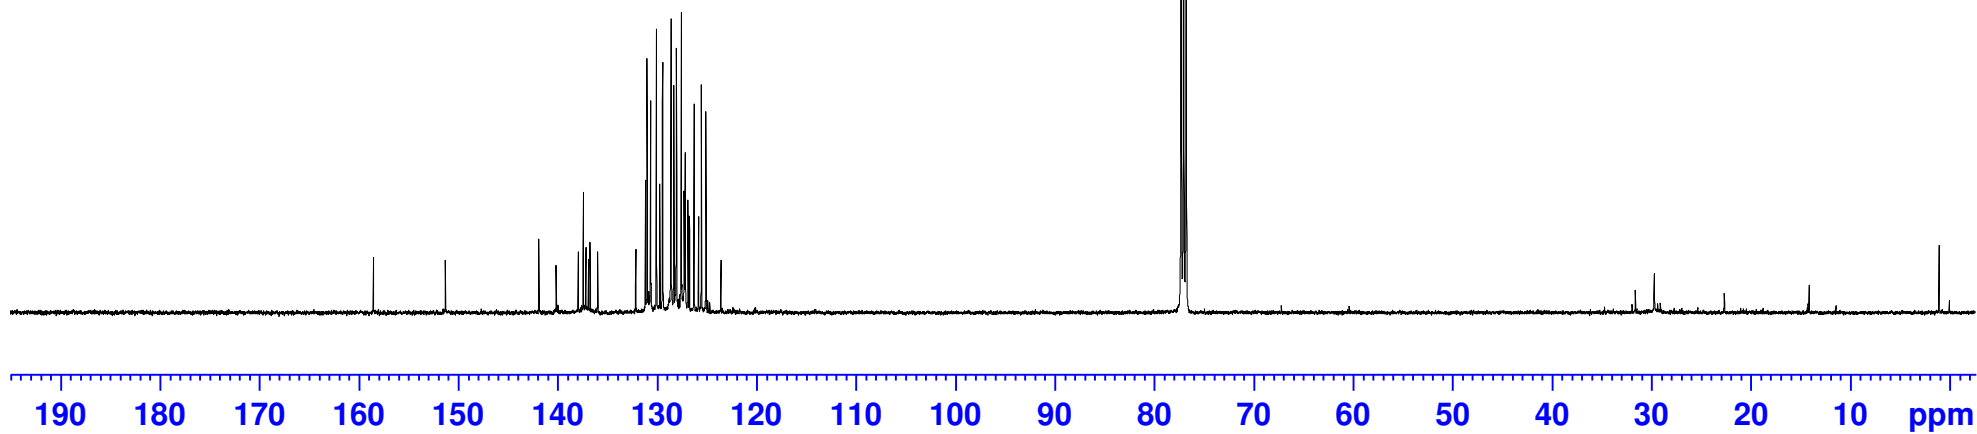

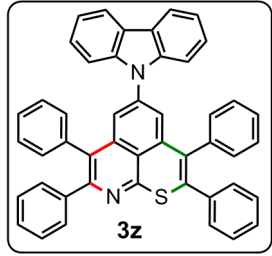

8.047  
8.028  
7.433  
7.428  
7.419  
7.417  
7.408  
7.403  
7.348  
7.331  
7.312  
7.288  
7.277  
7.268  
7.260  
7.235  
7.220  
7.210  
7.205  
7.193  
7.176  
7.132  
7.114  
7.100  
7.085  
7.080  
7.055  
7.051

SRS-1-376

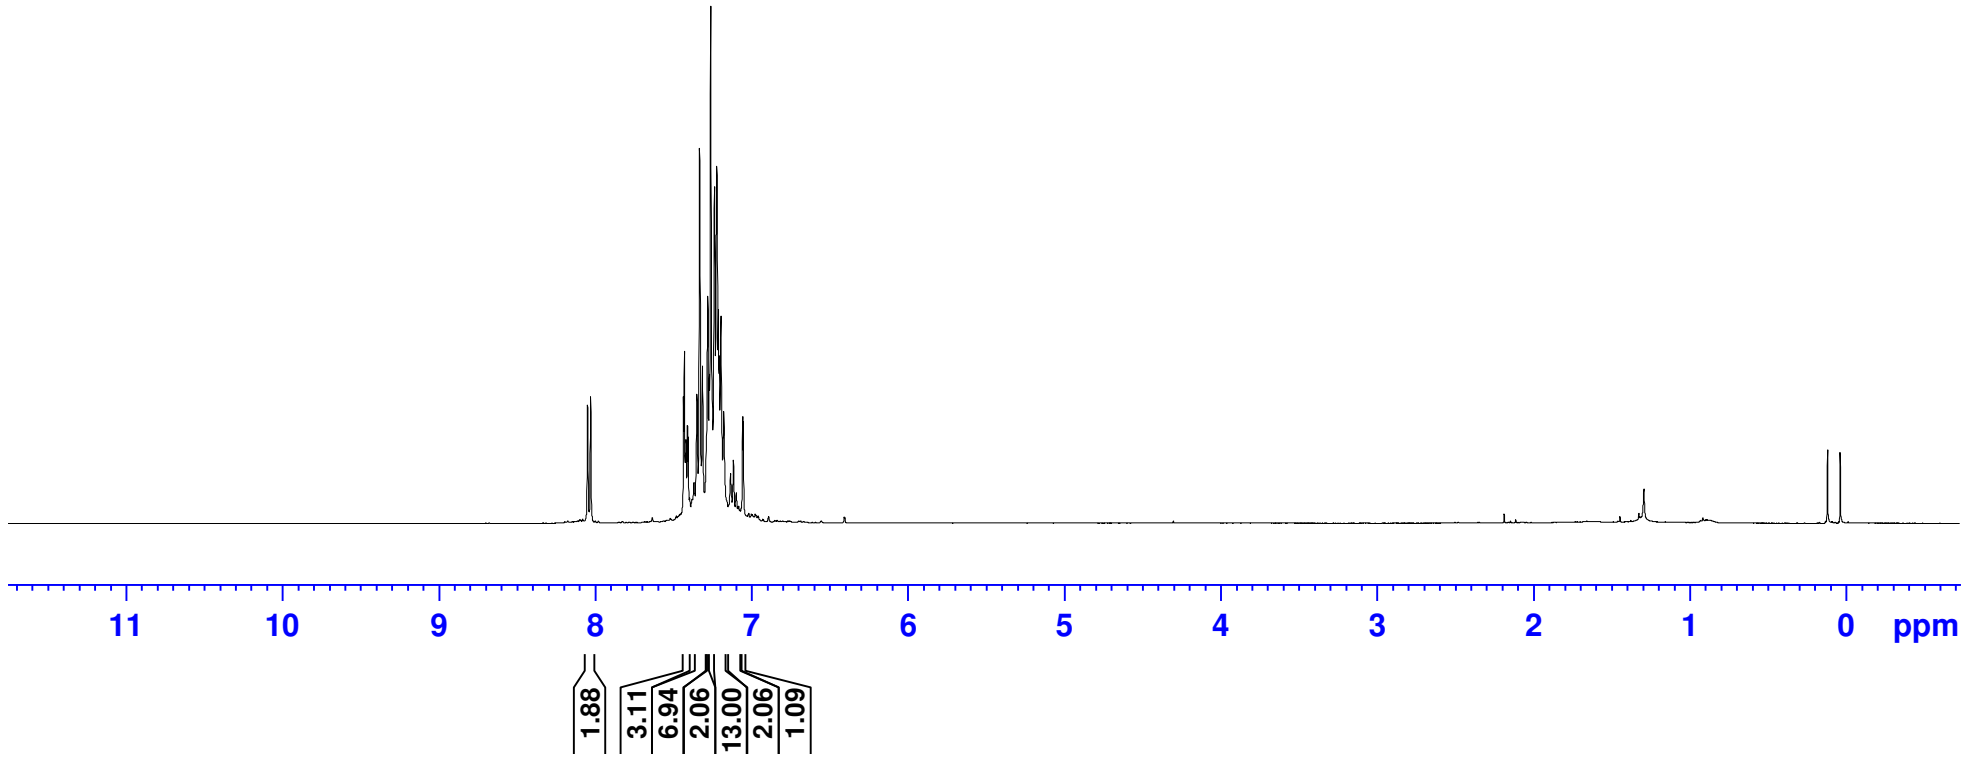



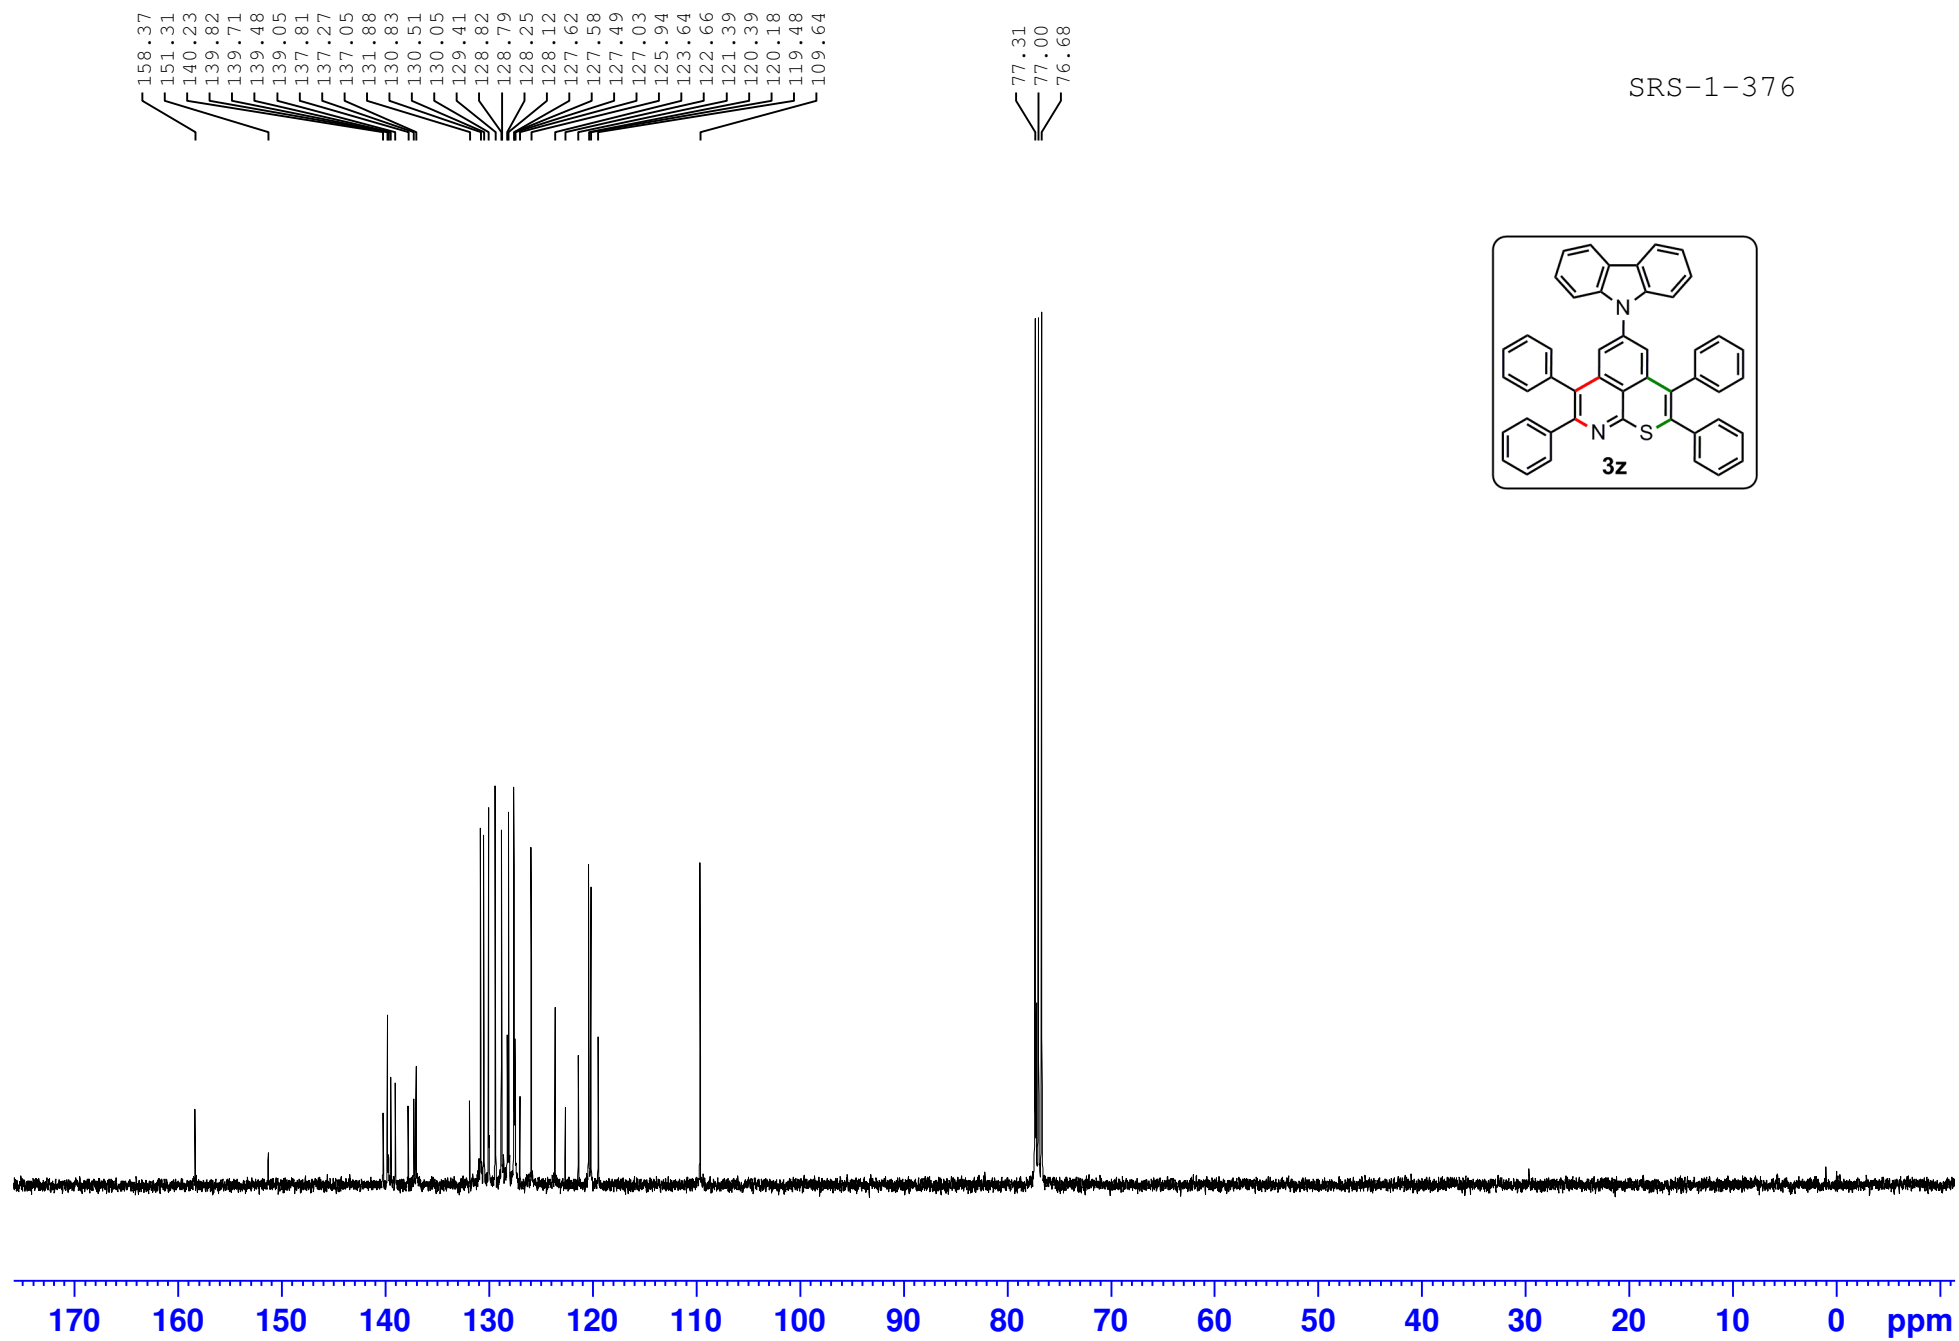

SRS-1-376

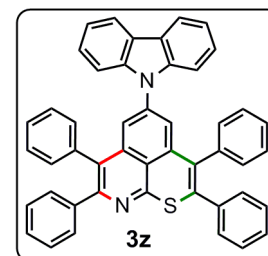

Arjit-AS-412

7.585  
7.568  
7.419  
7.416  
7.379  
7.365  
7.347  
7.330  
7.300  
7.285  
7.260  
7.241  
7.238  
7.231  
7.225  
7.222  
7.215  
7.210  
7.193  
7.187  
7.182  
7.179  
7.166  
7.163  
7.152  
7.149  
6.989  
6.985

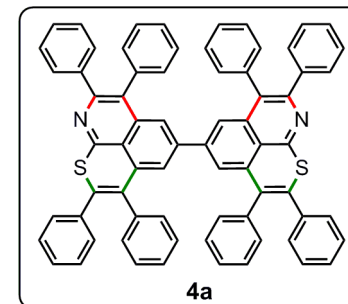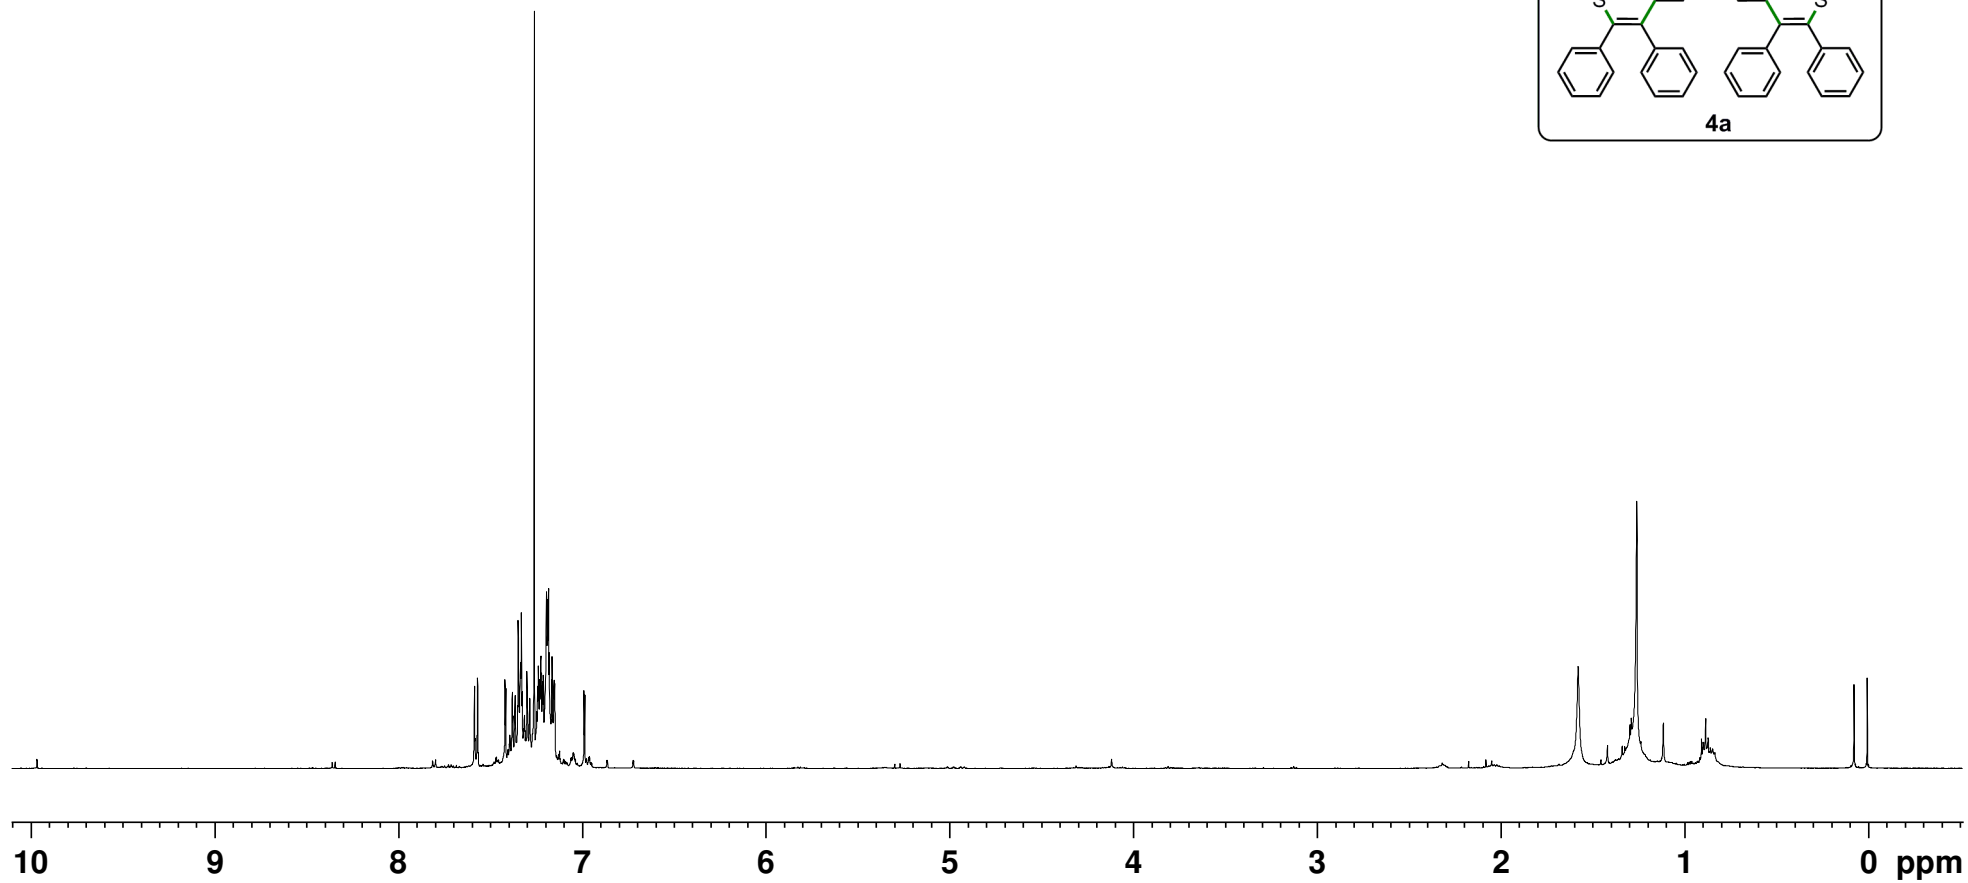

2.05  
1.02  
4.01  
8.12  
4.14  
10.00  
9.07  
5.03  
1.07

AS-412

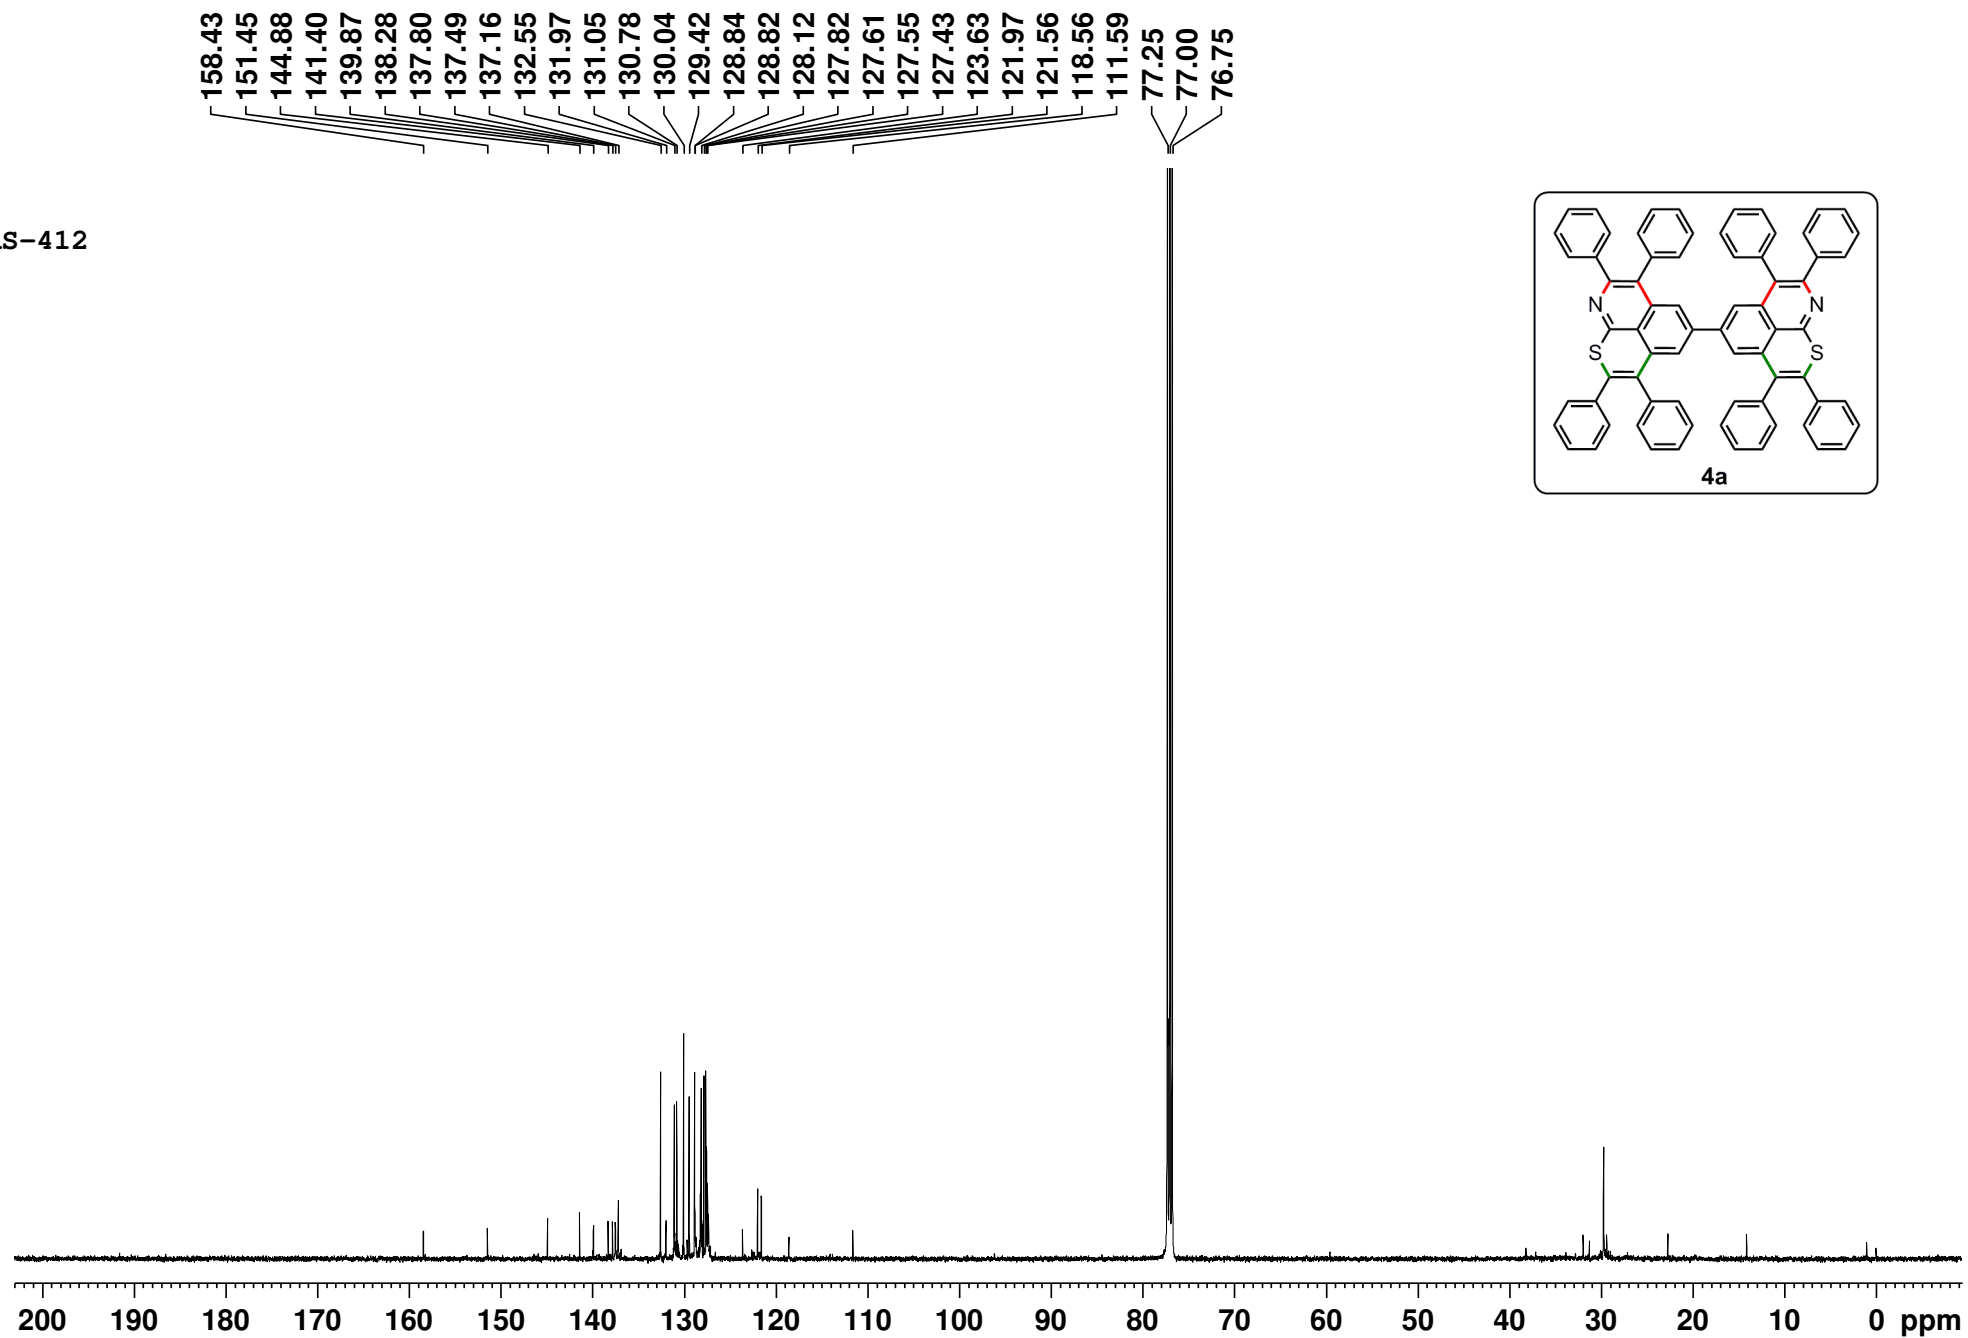

MJ-16-36

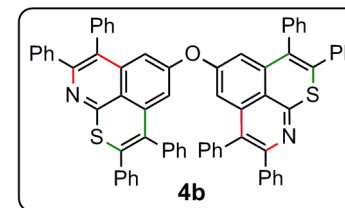

7.306  
7.299  
7.295  
7.282  
7.260  
7.196  
7.174  
7.150  
7.054  
7.041  
6.990  
6.976  
6.605  
6.601  
6.297  
6.293

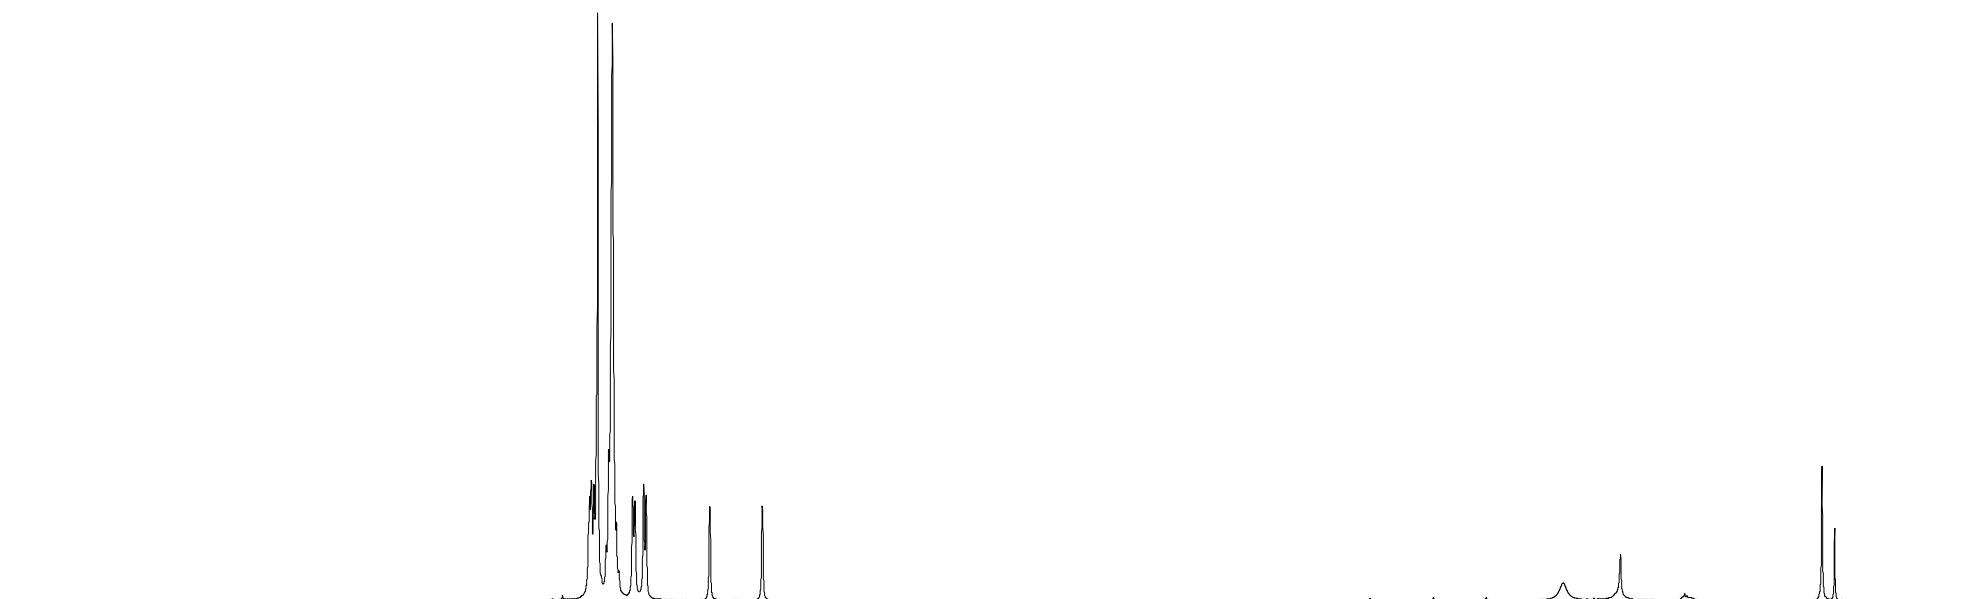

10 9 8 7 6 5 4 3 2 1 0 ppm

11.30  
21.31  
4.00  
4.18  
2.02  
2.05

MJ-16-36

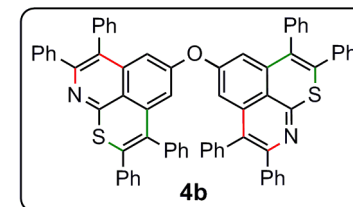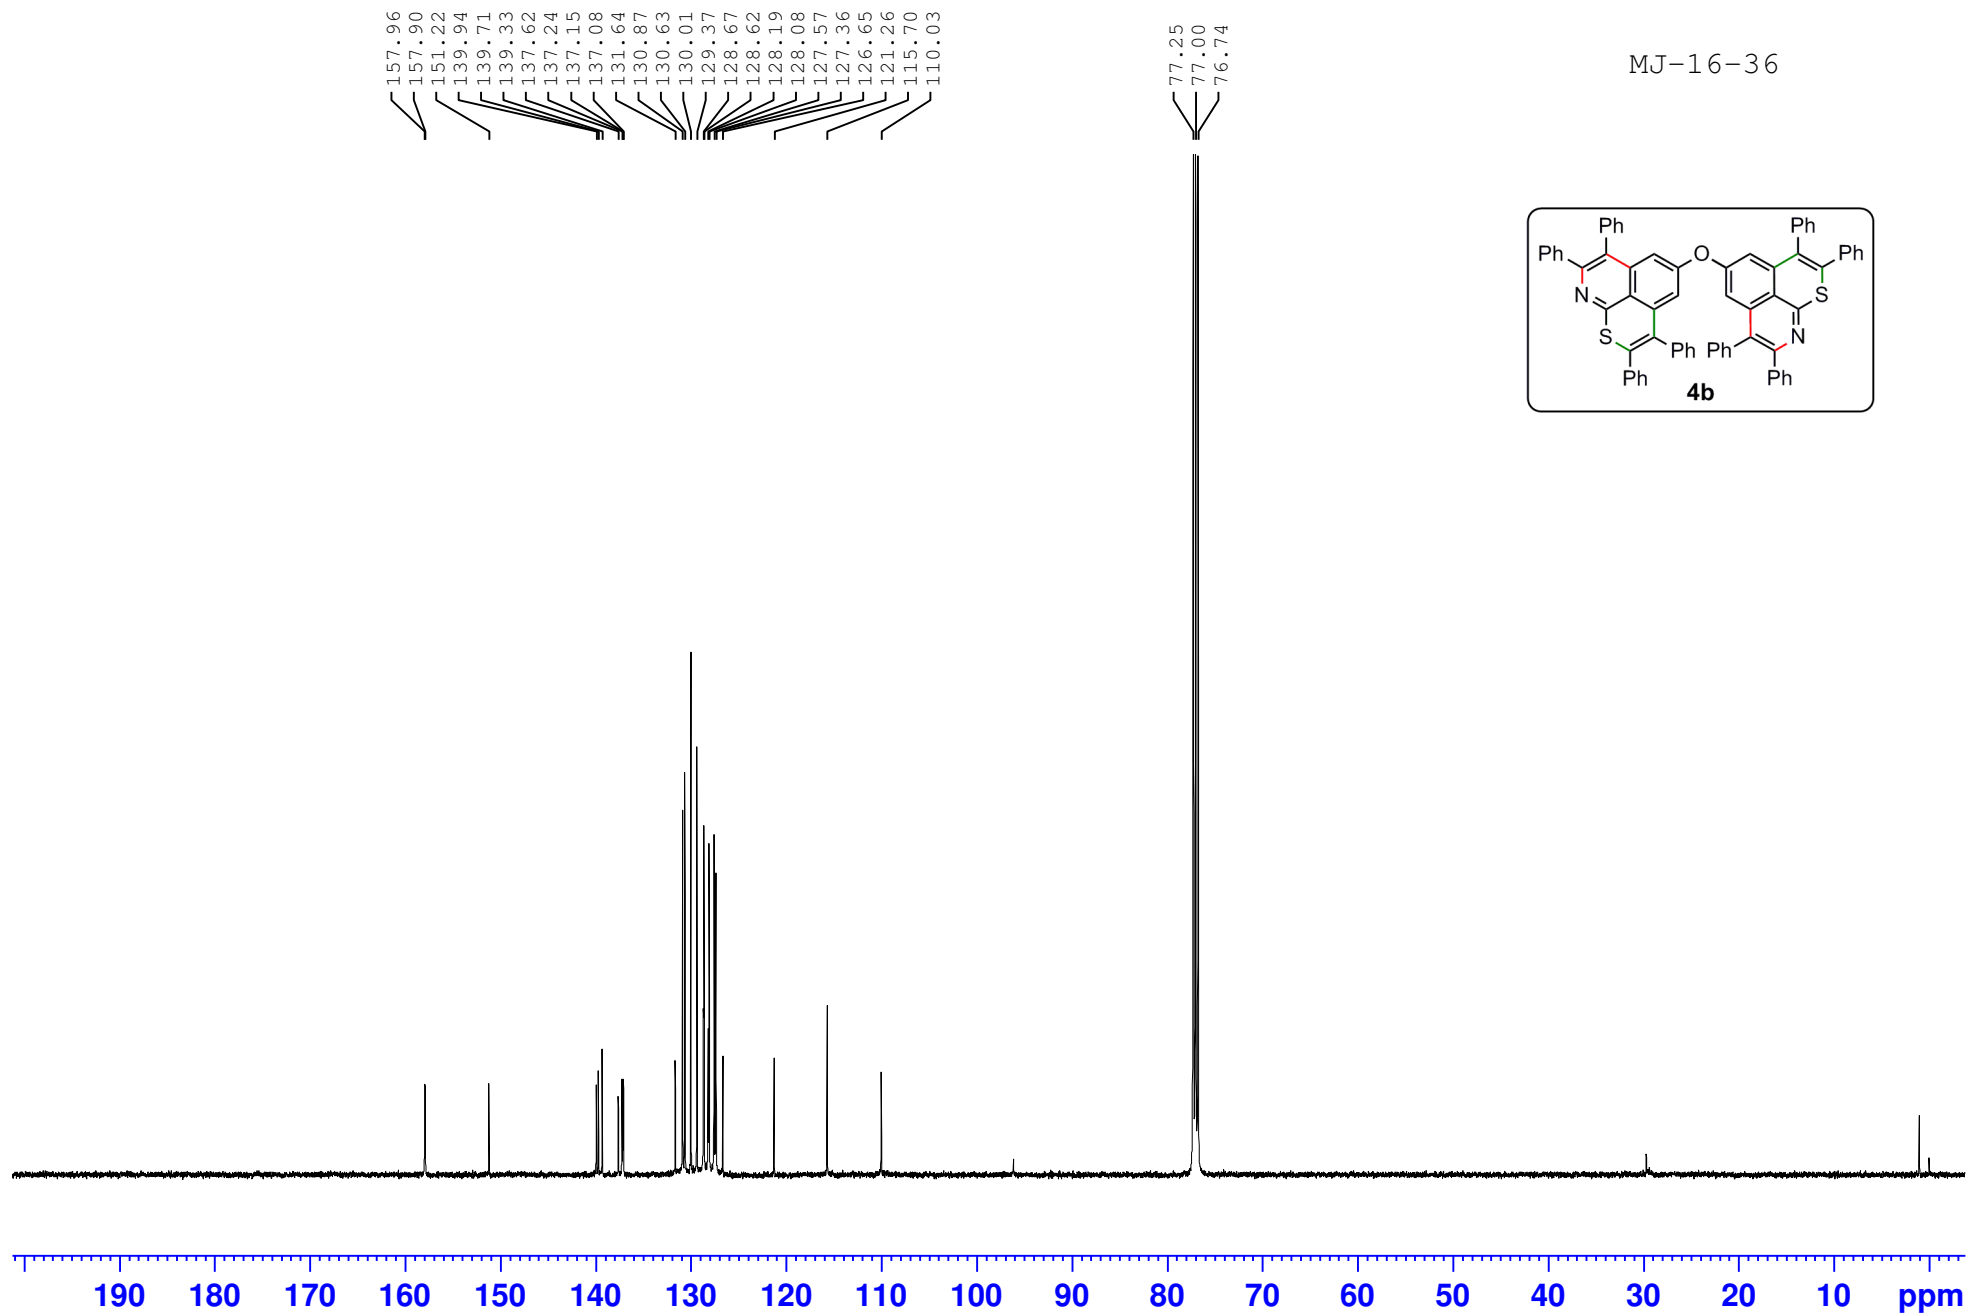

Ag-3-203

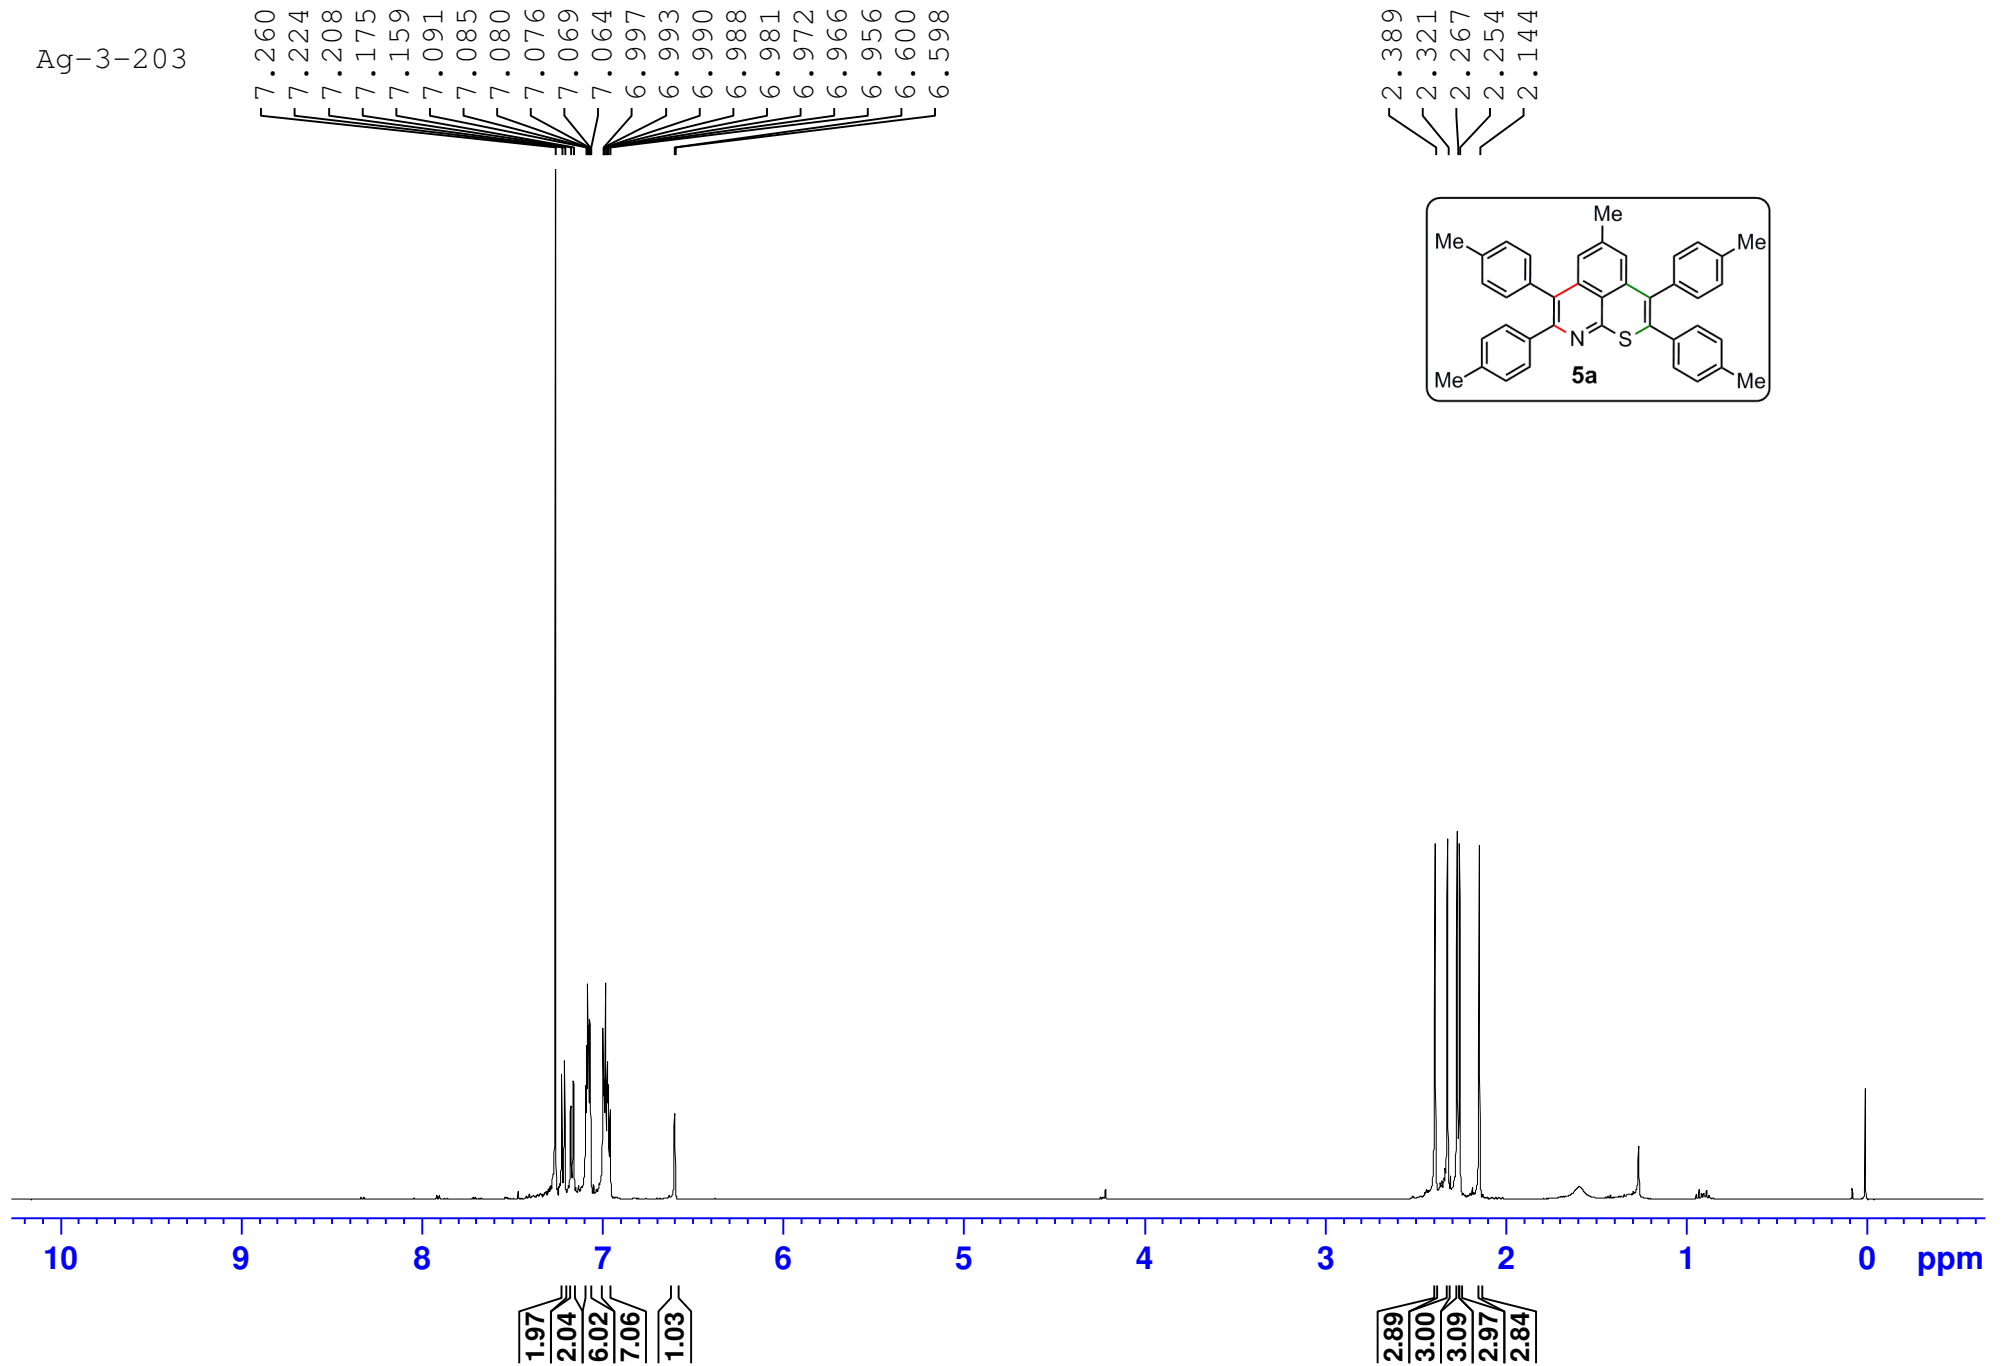

Ag-3-203

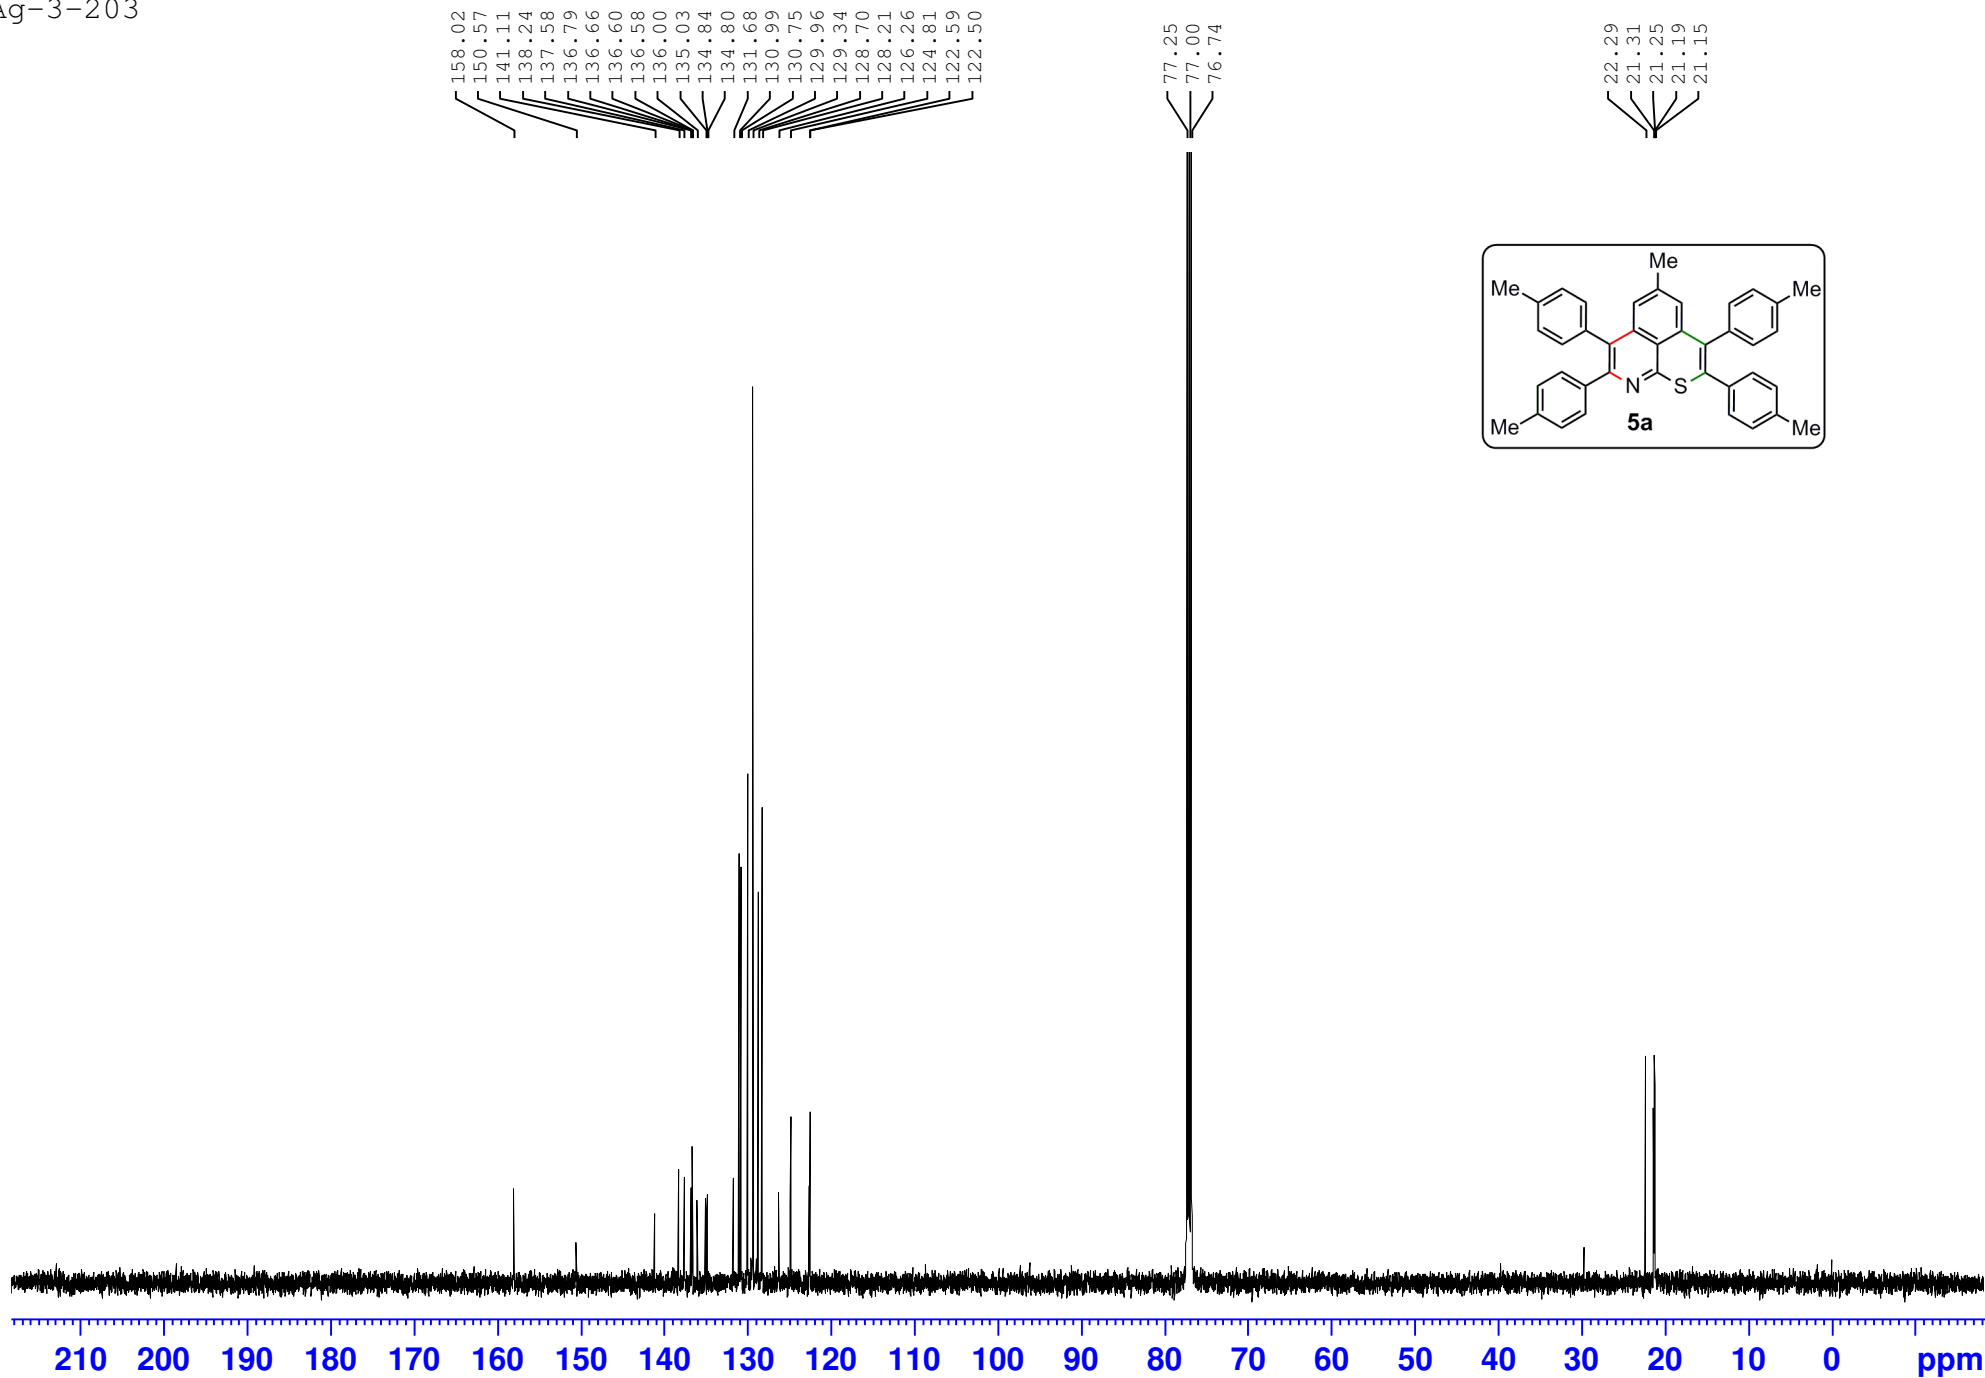

7.368  
7.351  
7.260  
7.256  
7.239  
7.226  
7.209  
7.158  
7.154  
7.145  
7.141  
7.130  
7.126  
7.122  
7.117  
7.113  
7.109  
7.106  
7.069  
7.062  
7.058  
7.054  
7.045  
7.041  
7.008  
7.004  
6.994  
6.991  
6.739

— 2.186

1.348  
1.273  
1.243  
1.218

AG-4-71

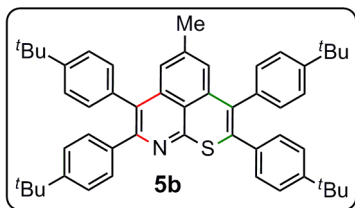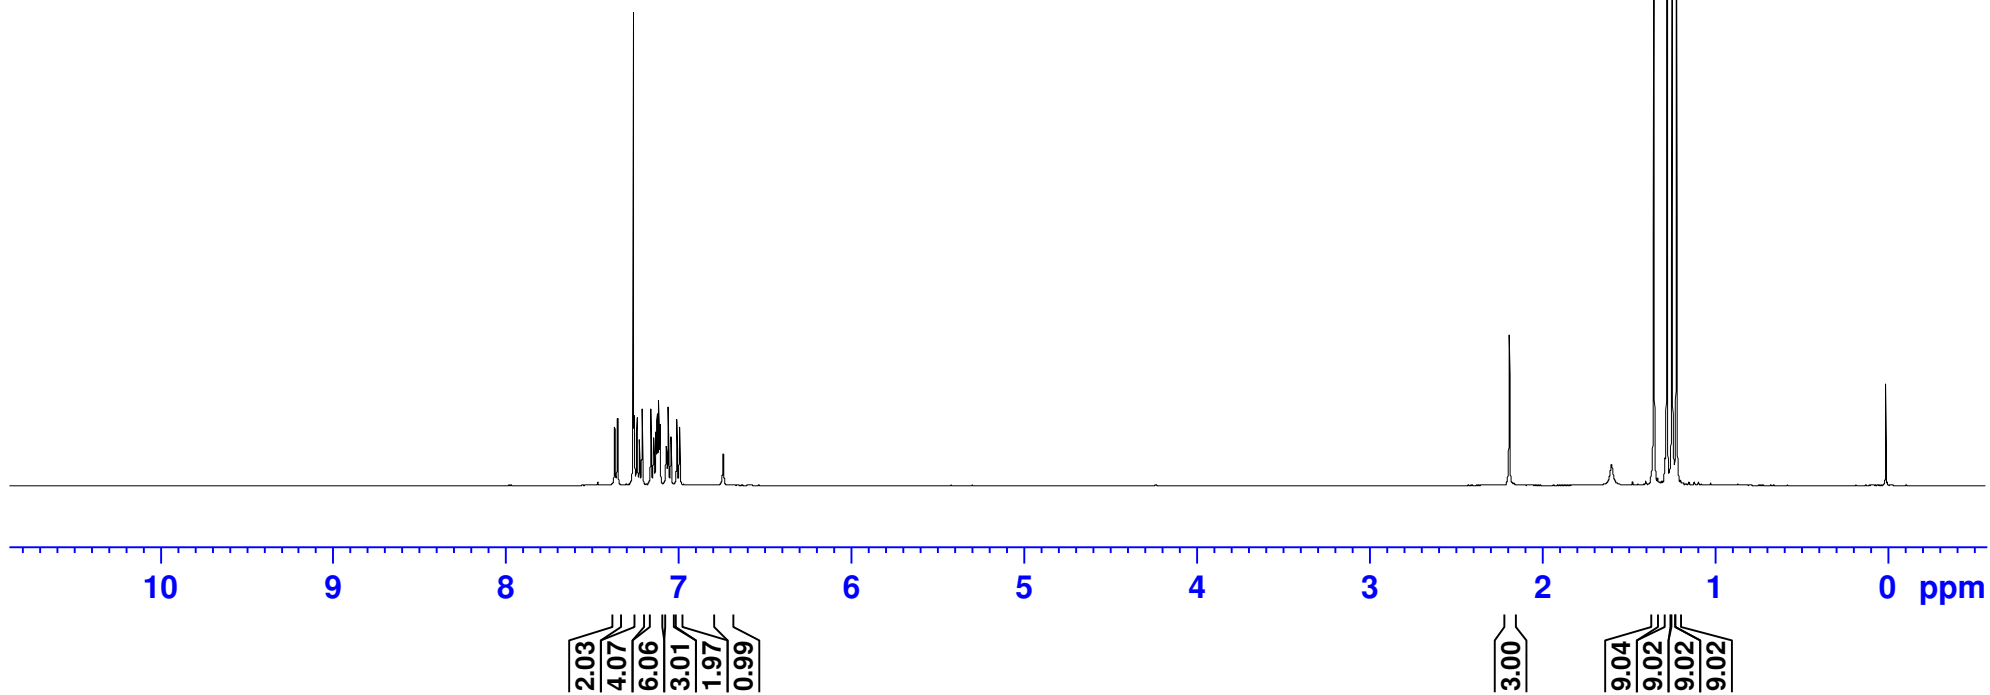



AG-4-71

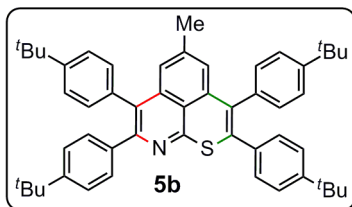

157.99  
150.59  
149.96  
149.88  
149.76  
141.16  
138.11  
137.36  
136.48  
136.03  
134.91  
134.70  
131.87  
130.74  
130.57  
129.61  
129.09  
126.36  
125.34  
125.18  
124.76  
124.56  
124.28  
122.60  
122.51

77.25  
77.00  
76.74

34.54  
34.44  
34.36  
31.36  
31.25  
31.21  
31.10  
22.34

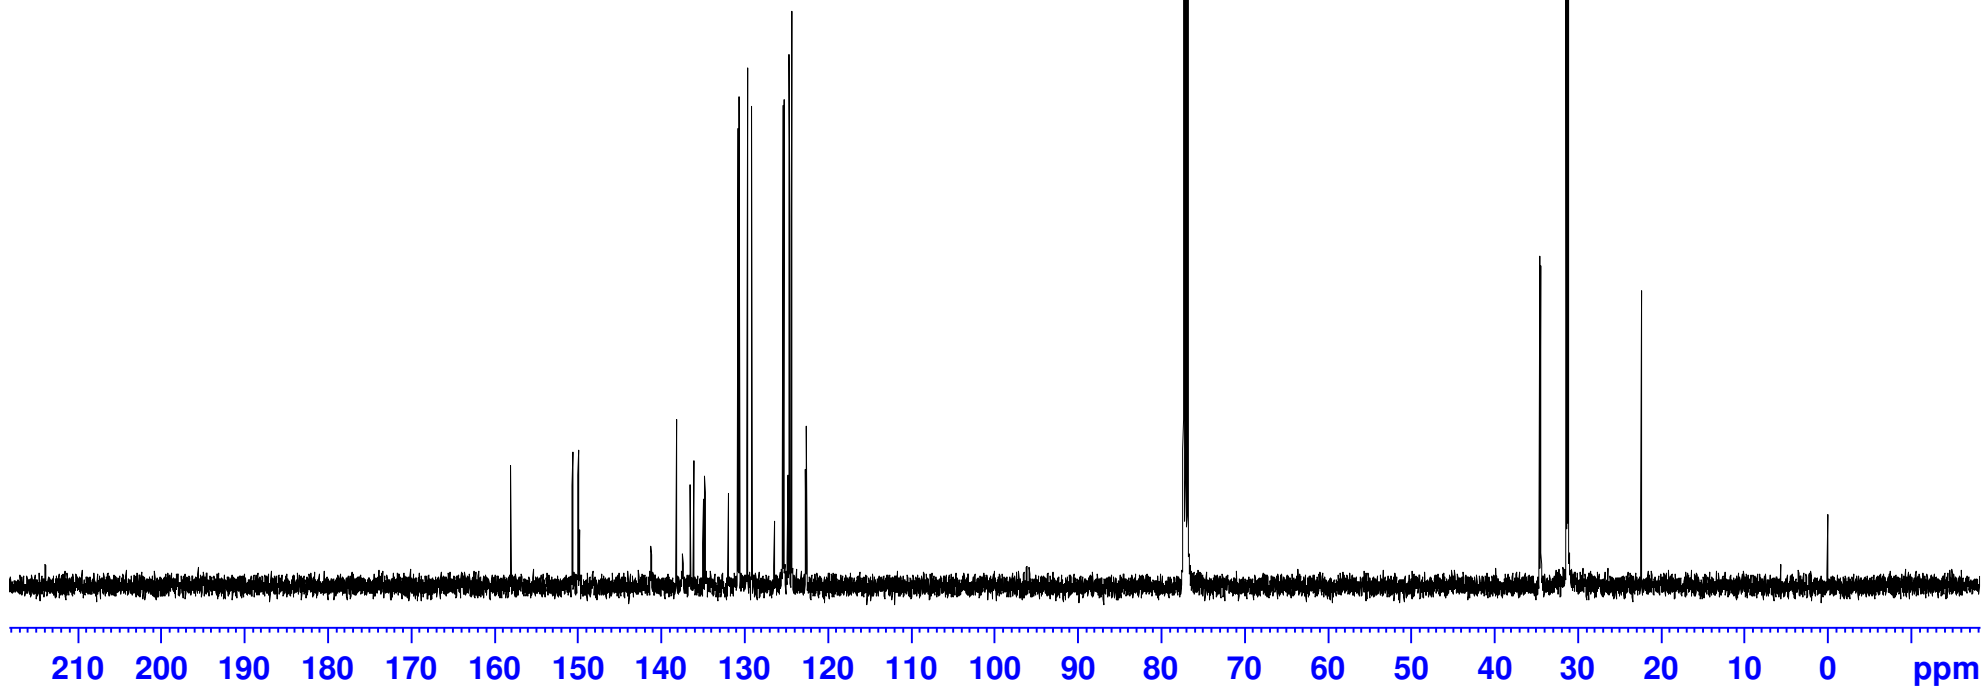

AG-3-205

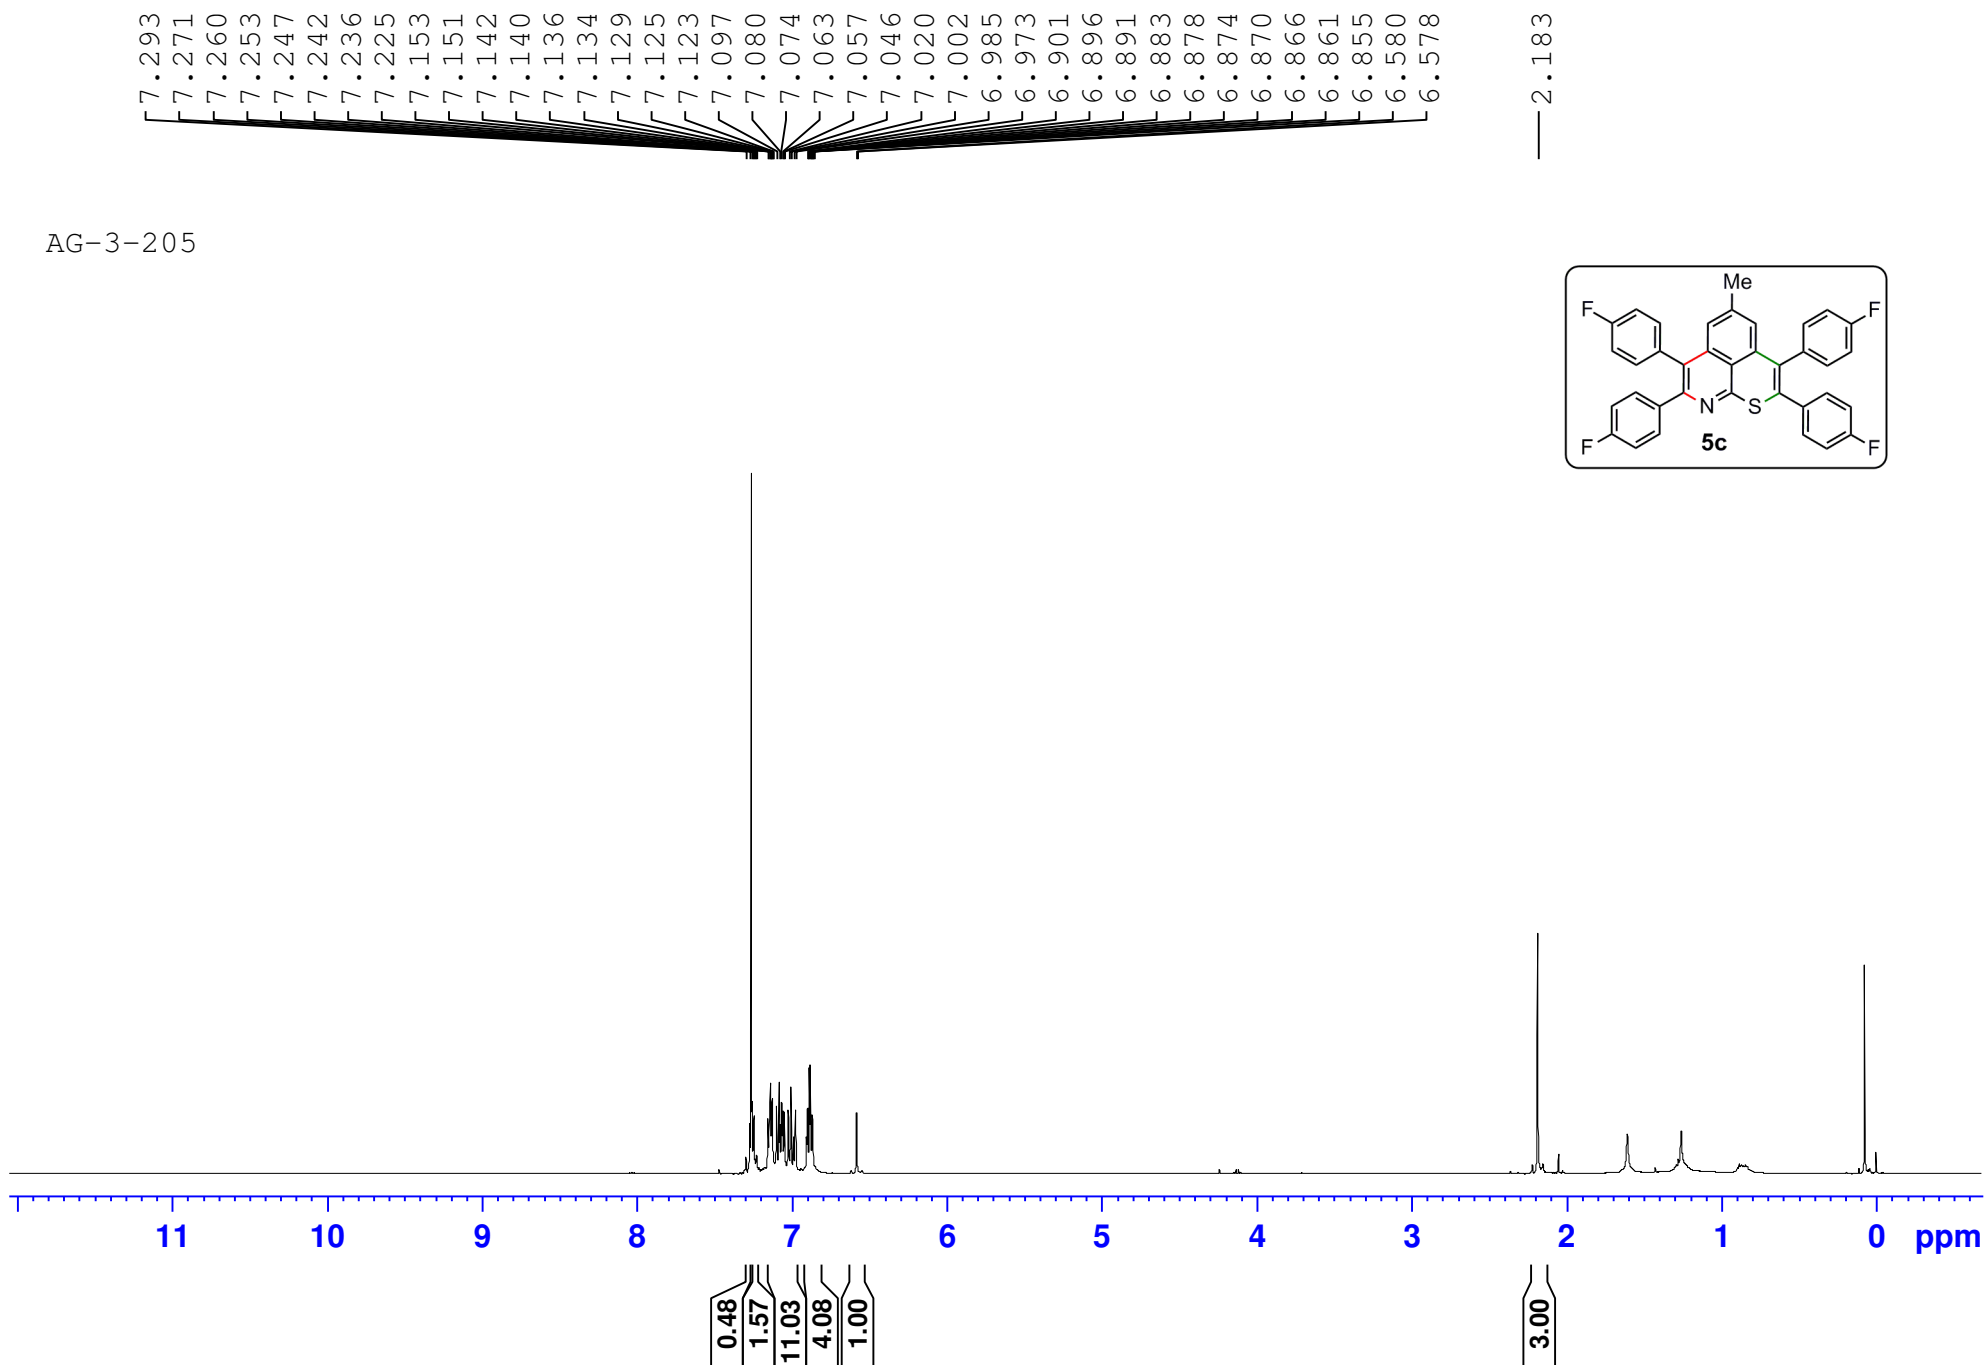

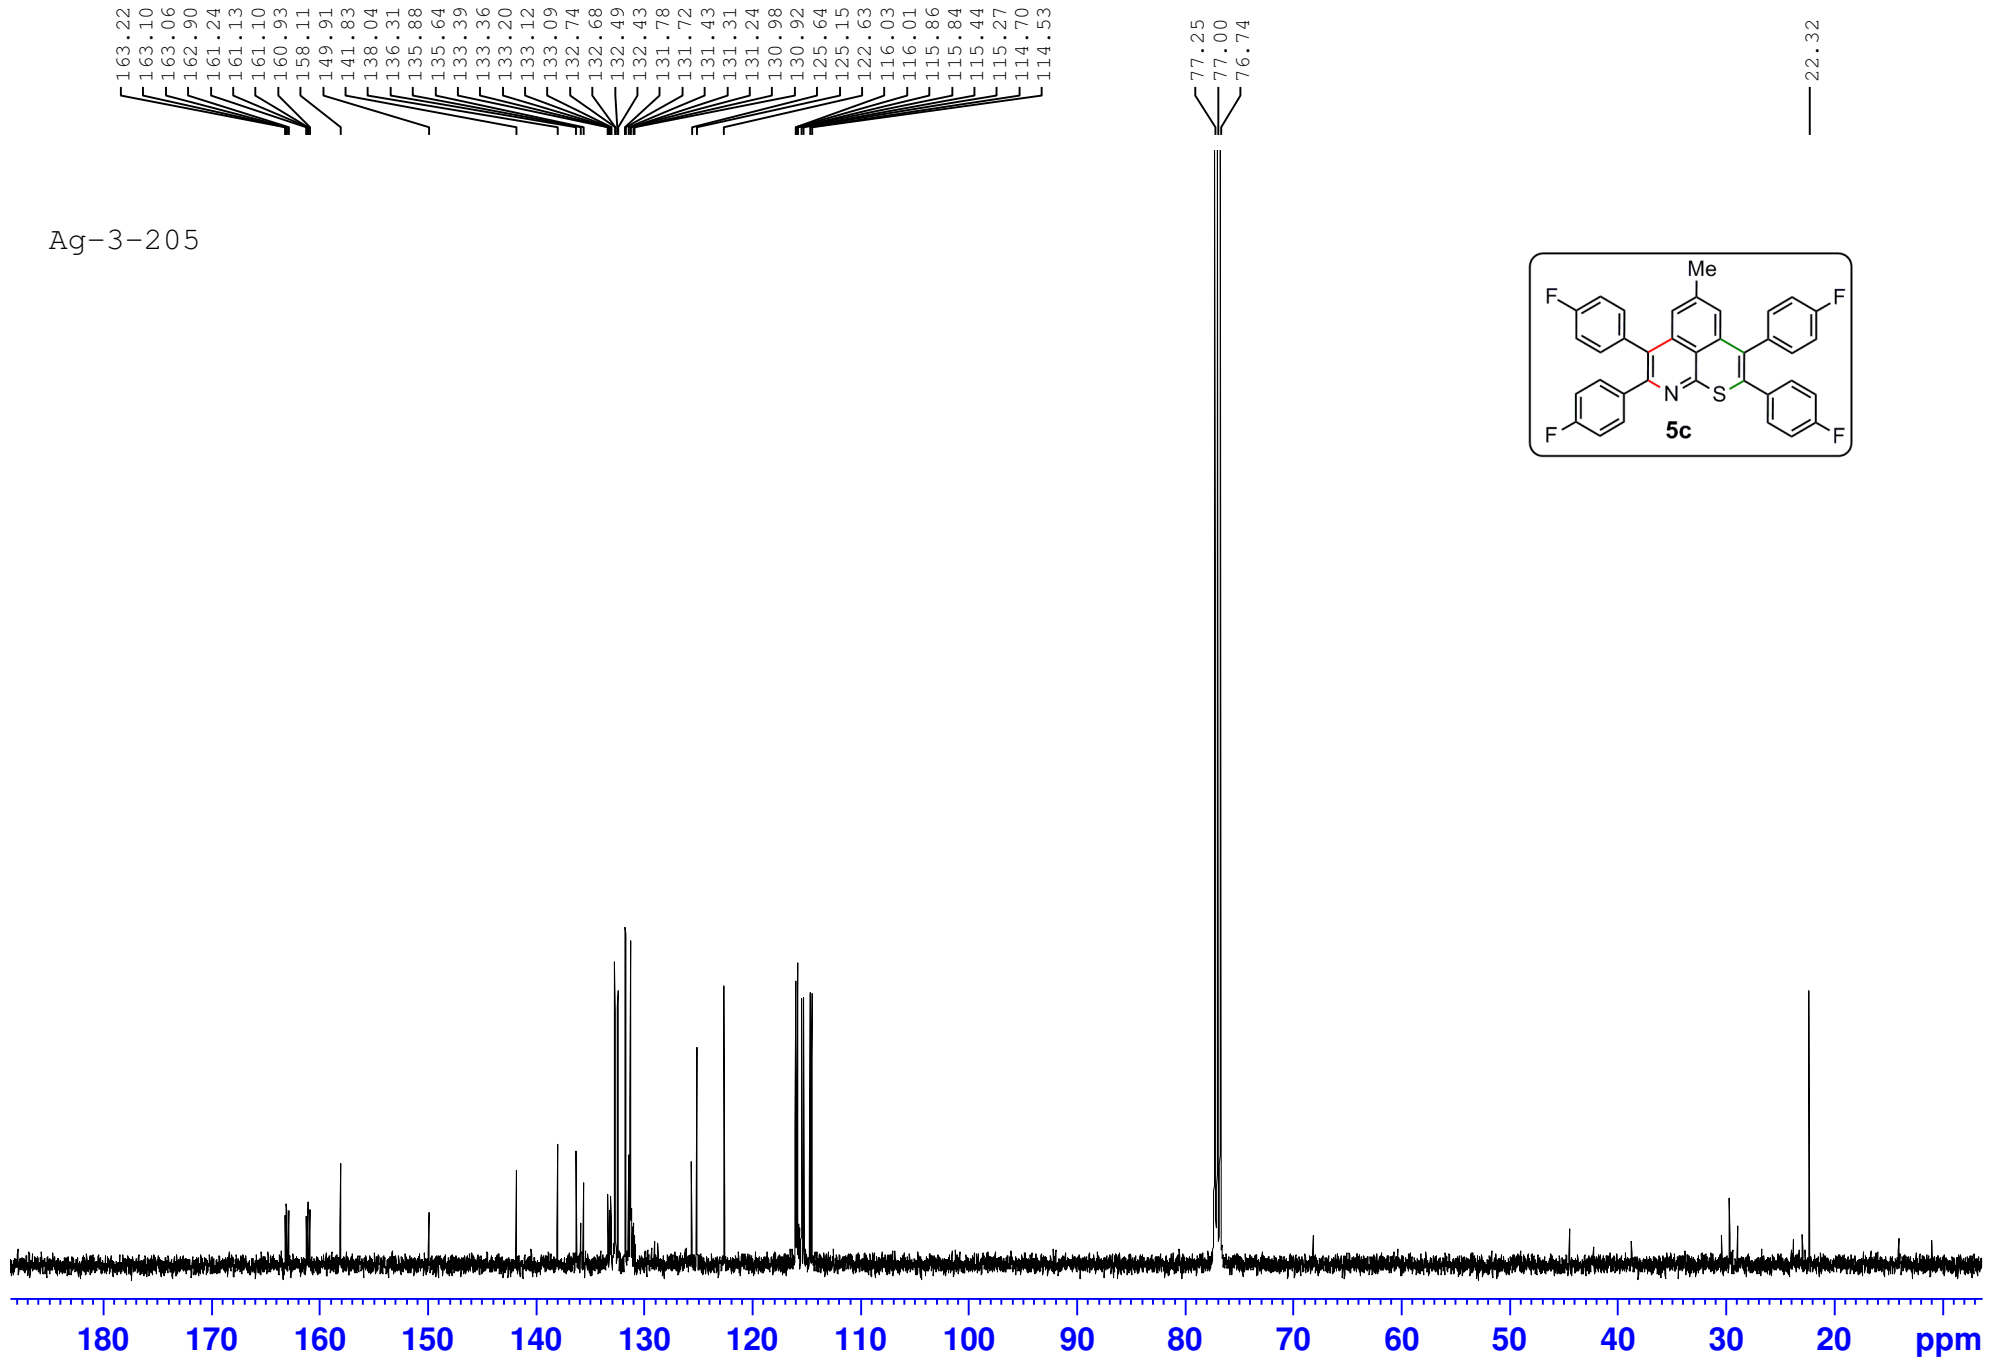

Ag-3-205

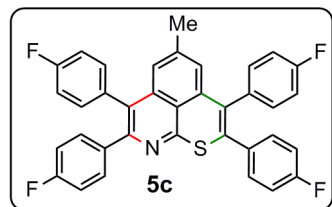

-112.44  
-114.01  
-114.26  
-114.54

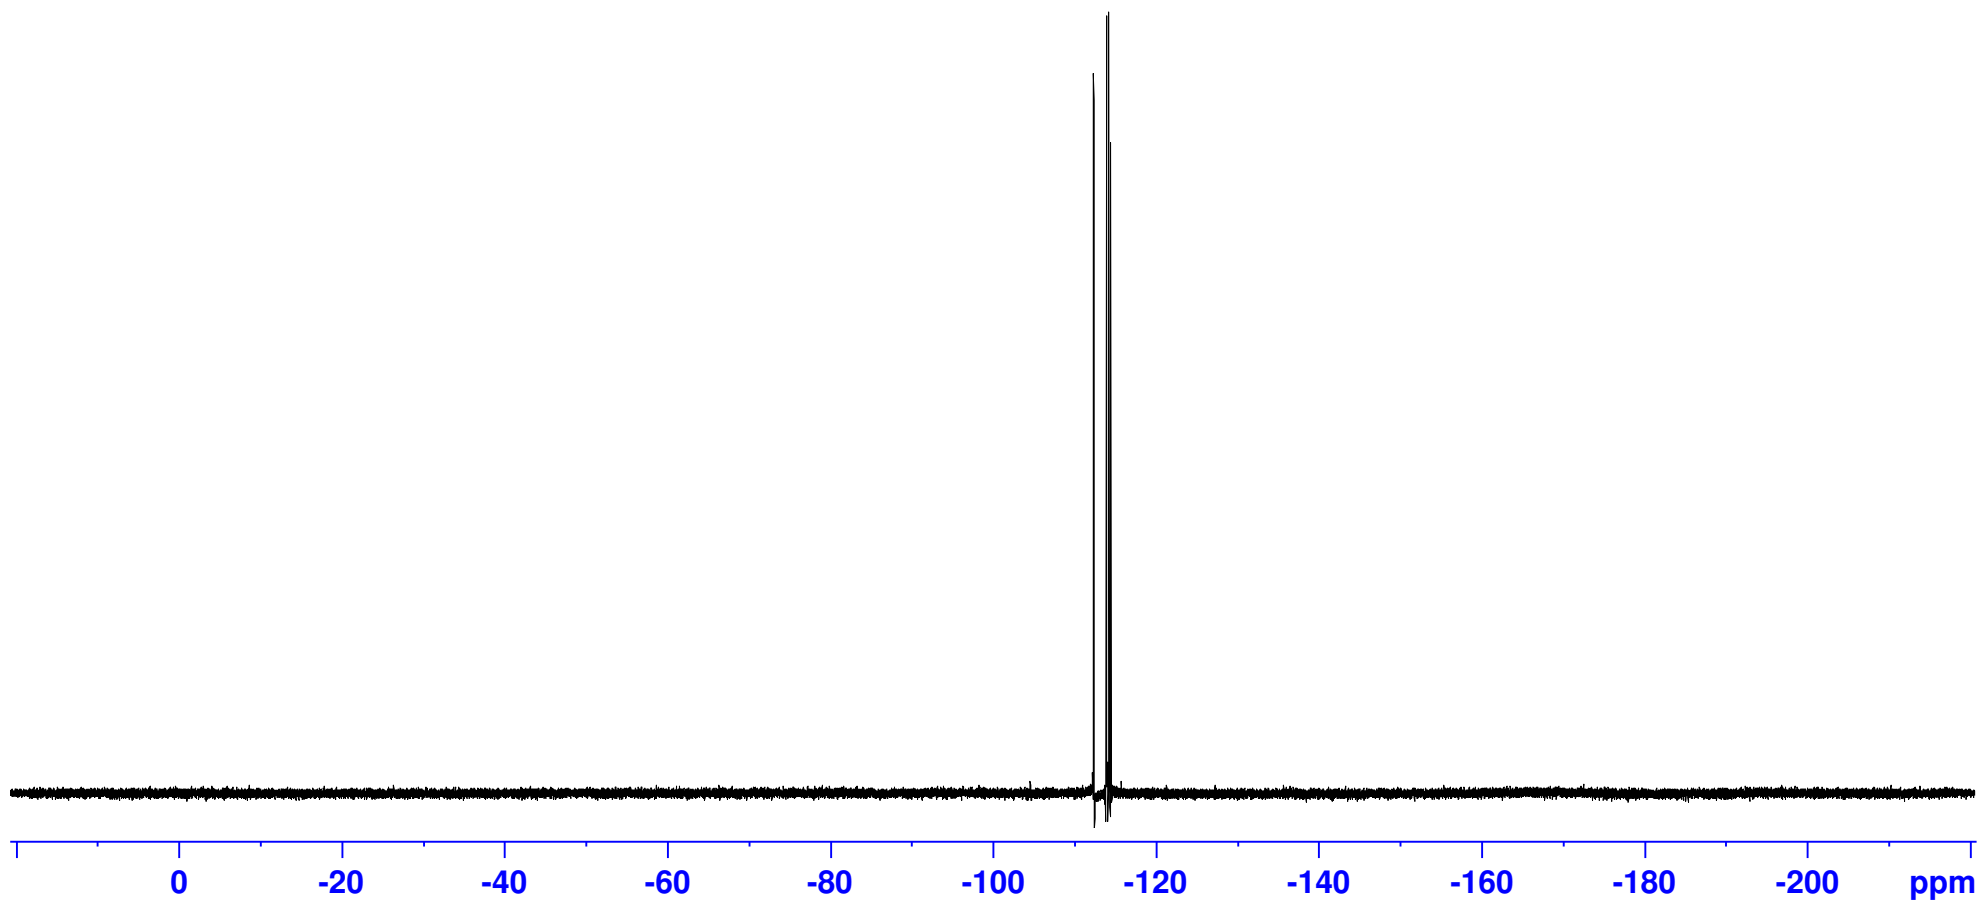

AG-4-74

7.260  
7.245  
7.230  
7.185  
7.169  
7.154  
7.131  
7.116  
7.057  
7.041  
7.026  
7.011  
6.989  
6.973  
6.965  
6.952  
6.949  
6.929  
6.914  
6.628

2.324  
2.276  
2.246  
2.221  
2.167

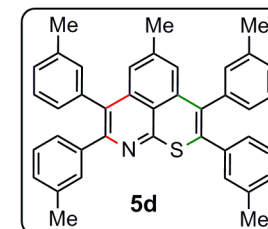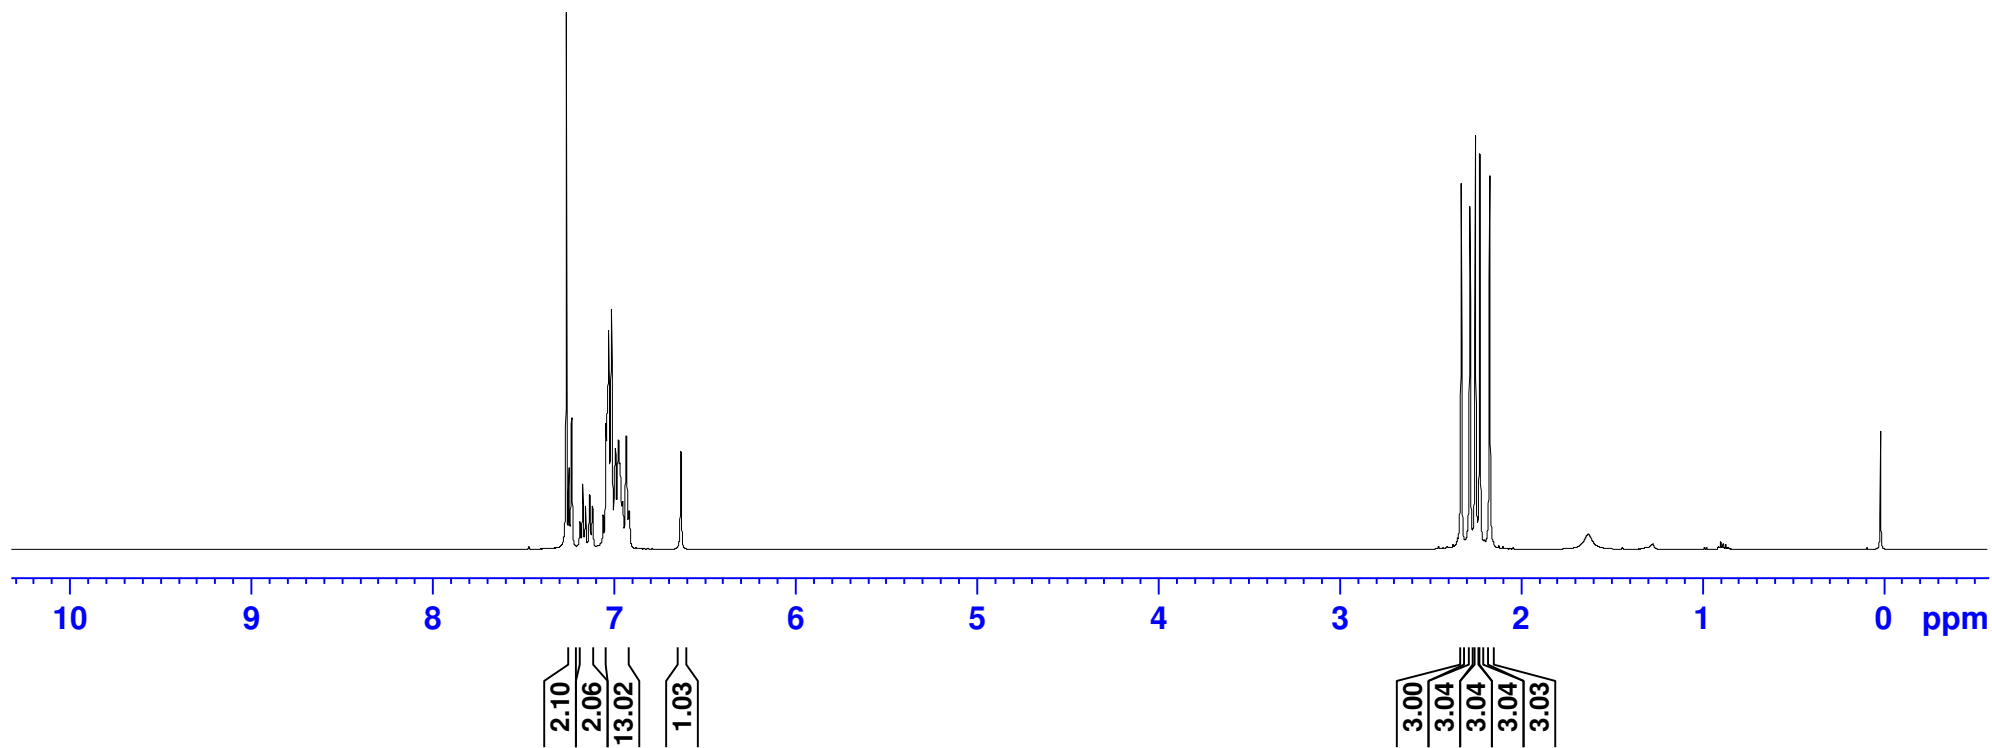

AG-4-74

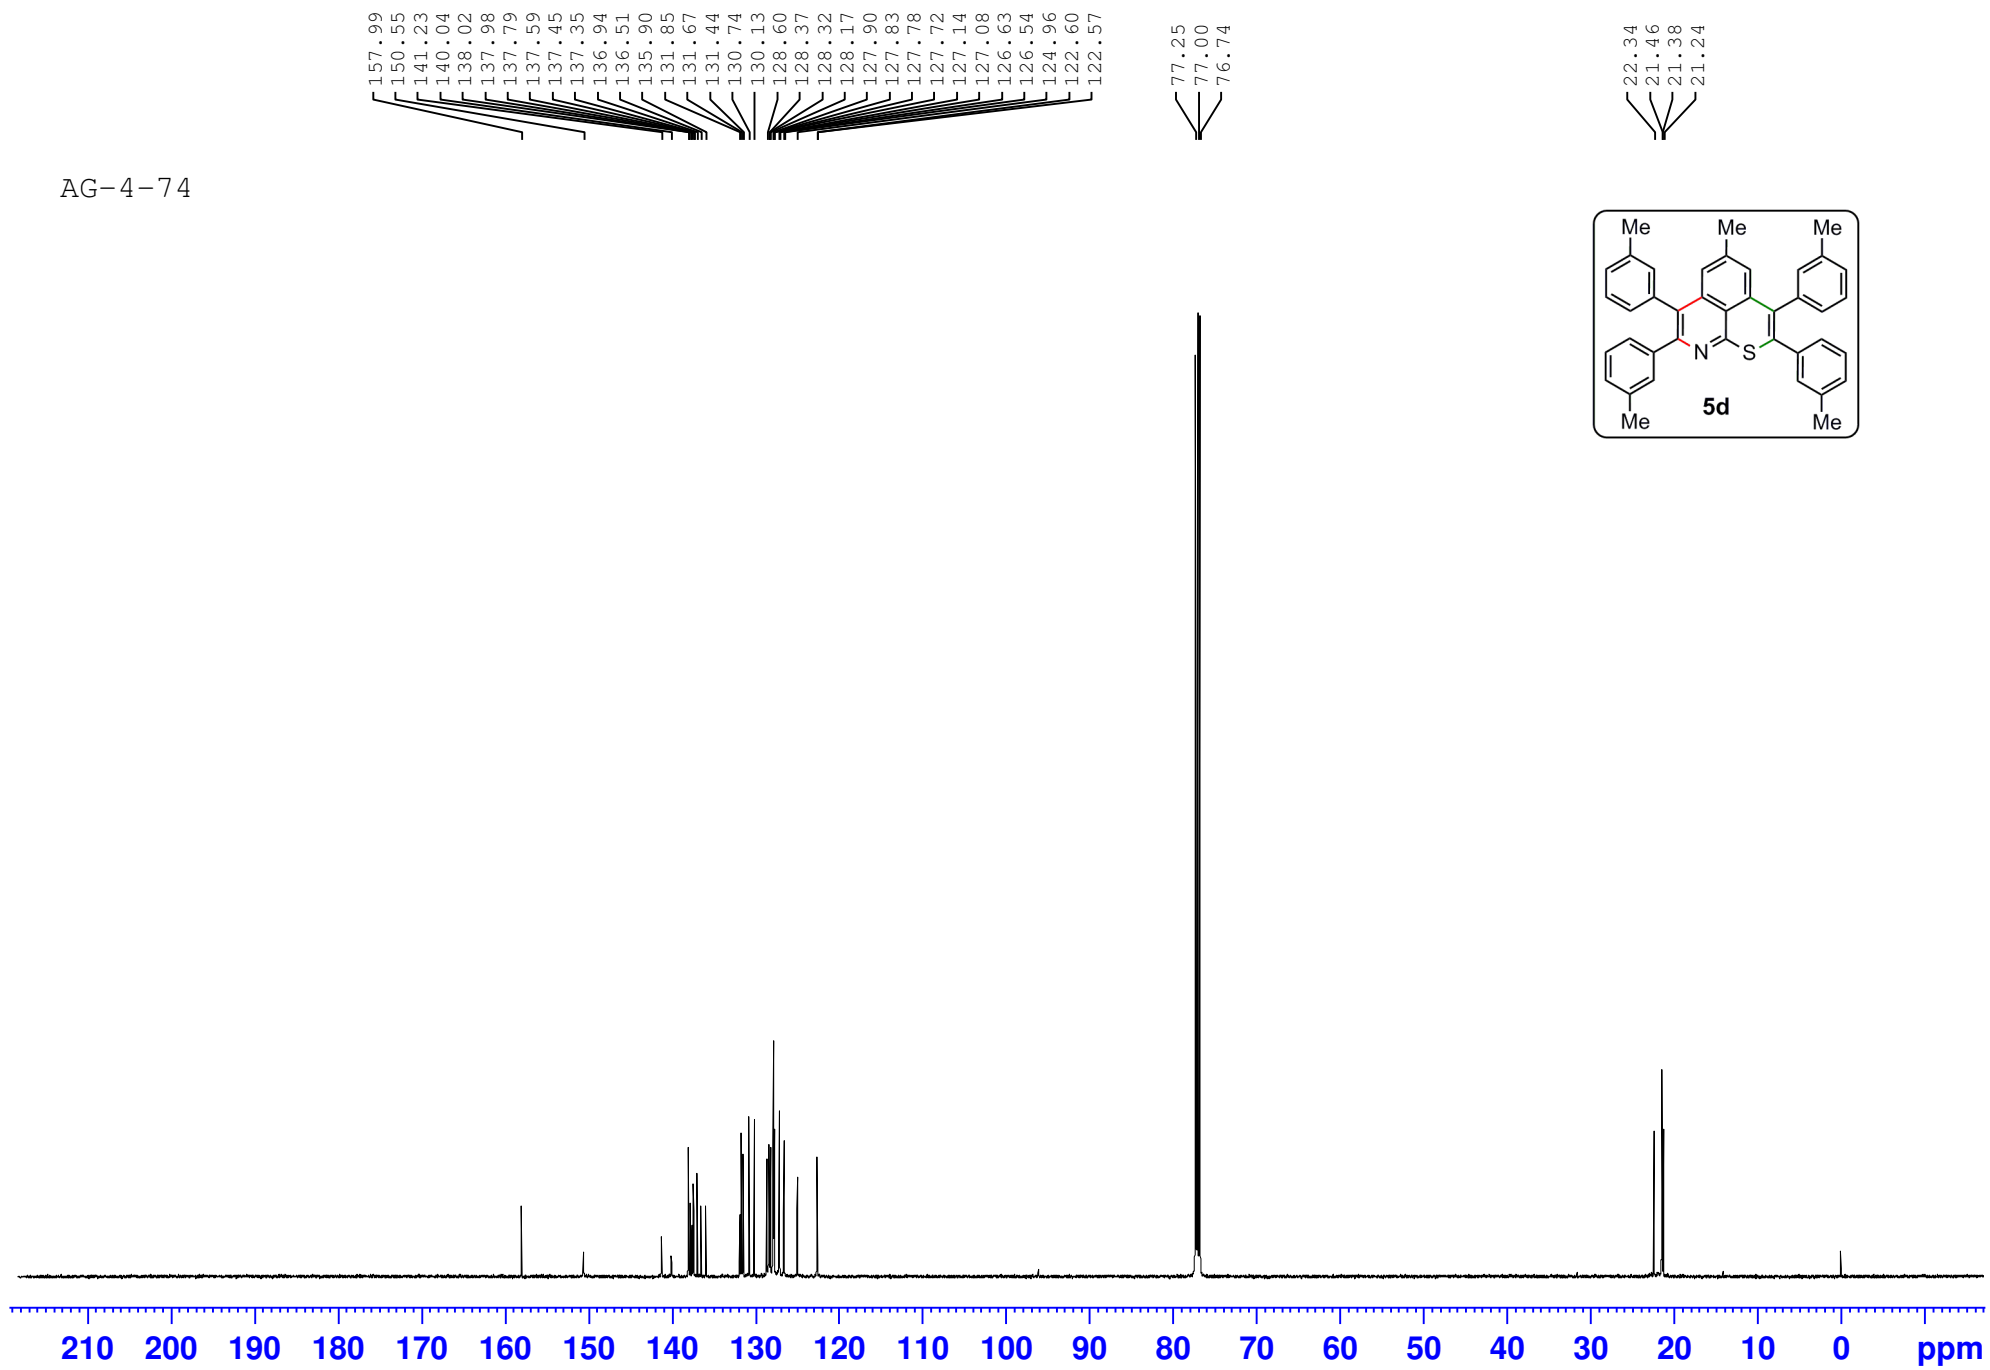

MJ-16-28

7.575  
7.566  
7.484  
7.474  
7.269  
7.259  
7.237  
7.148  
7.141  
7.132  
7.031  
7.025  
7.009  
7.004  
6.960  
6.925  
6.916  
6.908  
6.880  
6.872  
6.863  
6.747  
6.737  
6.730

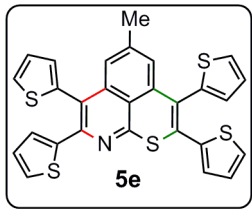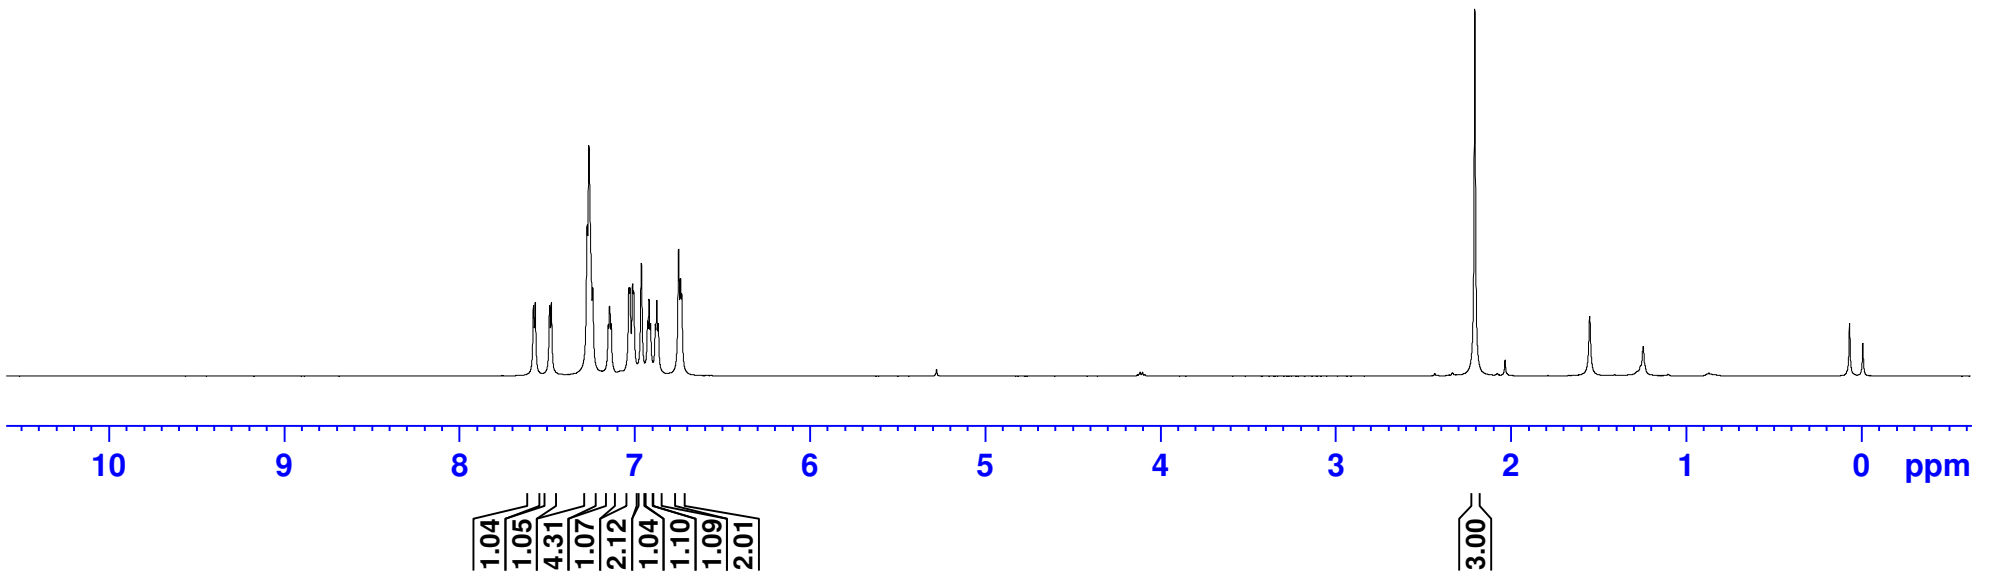

MJ-16-28

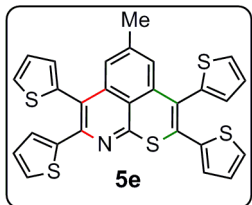

158.15  
145.56  
143.66  
142.02  
139.15  
138.52  
137.94  
137.77  
136.54  
132.01  
130.19  
128.93  
128.86  
128.55  
128.13  
127.99  
127.89  
127.83  
127.71  
127.61  
127.44  
126.32  
125.53  
123.54  
122.99  
121.38  
116.32

77.25  
77.00  
76.74

22.42

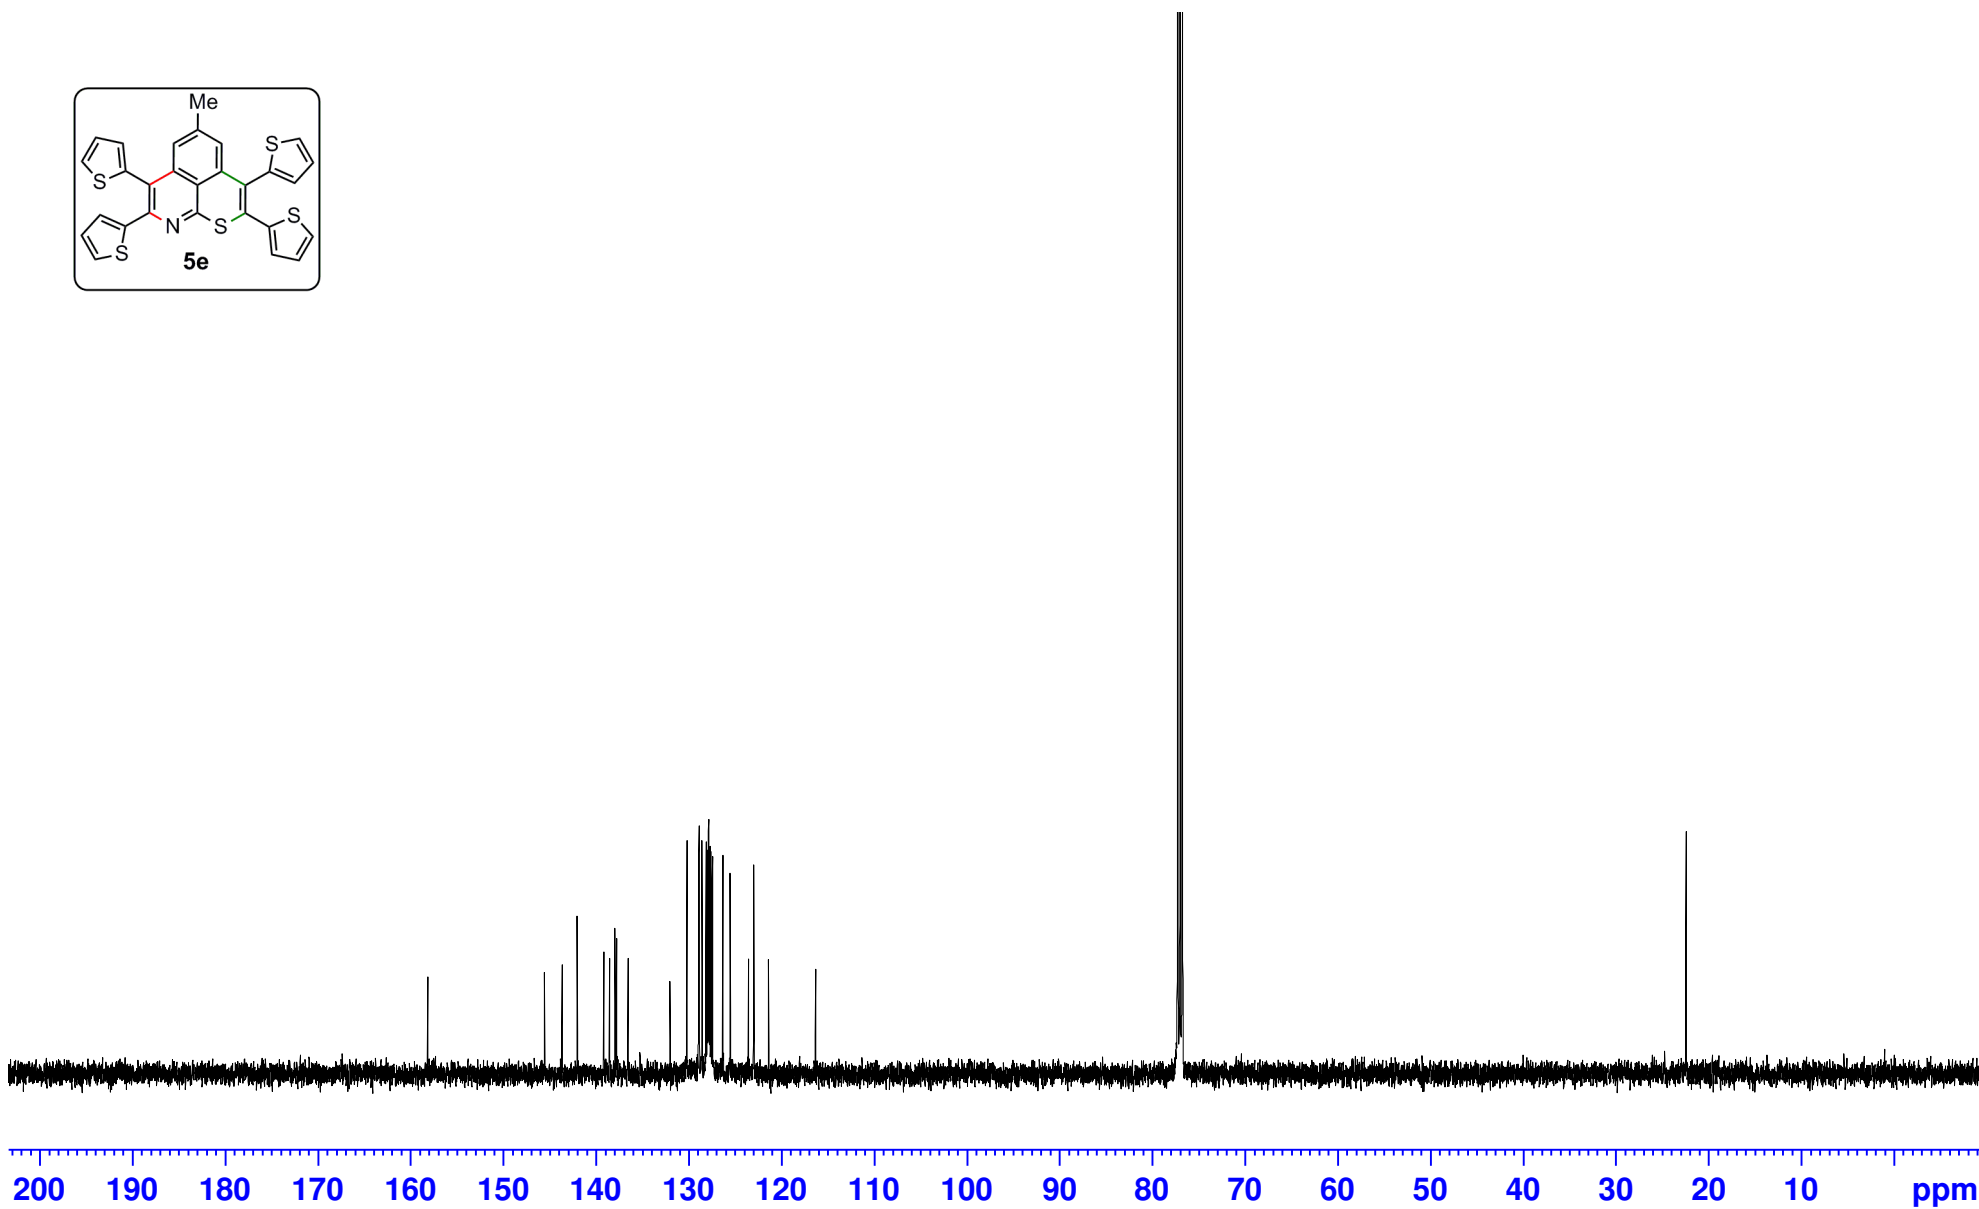



MJ-17-72

7.932  
7.929  
7.379  
7.376  
7.259  
7.239  
7.223  
7.195  
7.179  
7.108  
7.098  
7.095  
7.082  
7.079  
7.012  
7.007  
7.004  
6.999  
6.996  
6.988  
6.973

3.740

2.397  
2.320  
2.281  
2.261

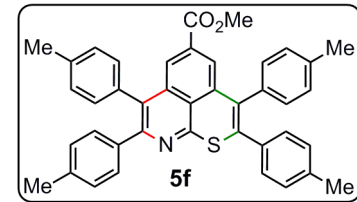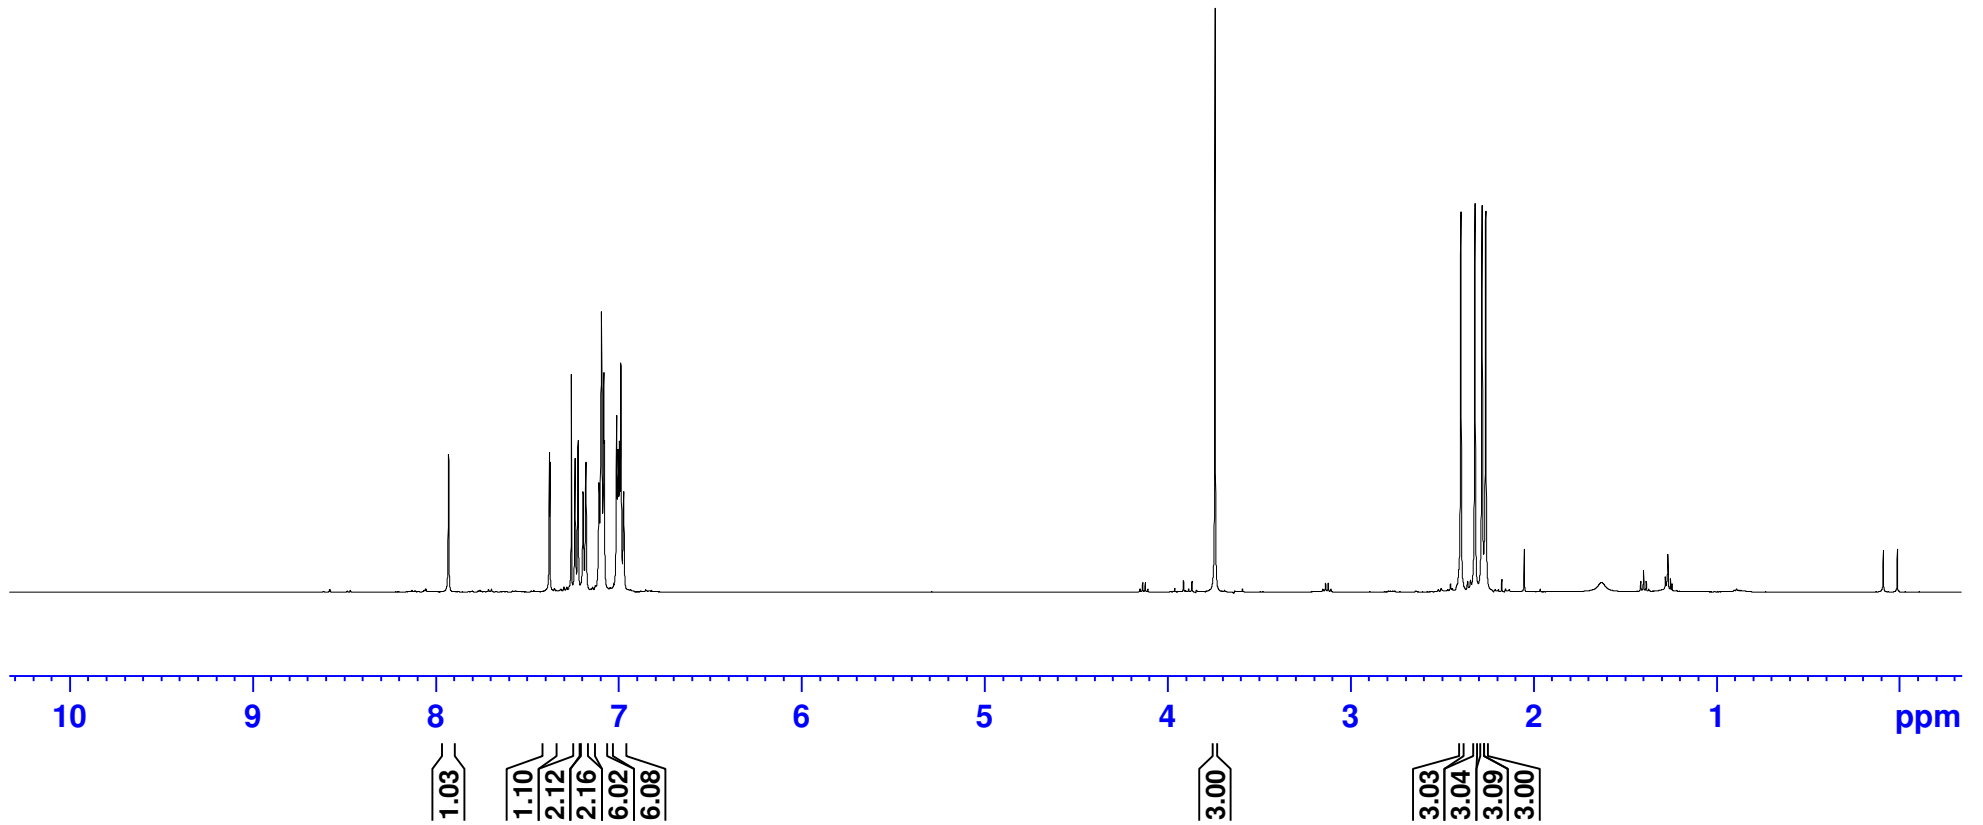

MJ-17-72

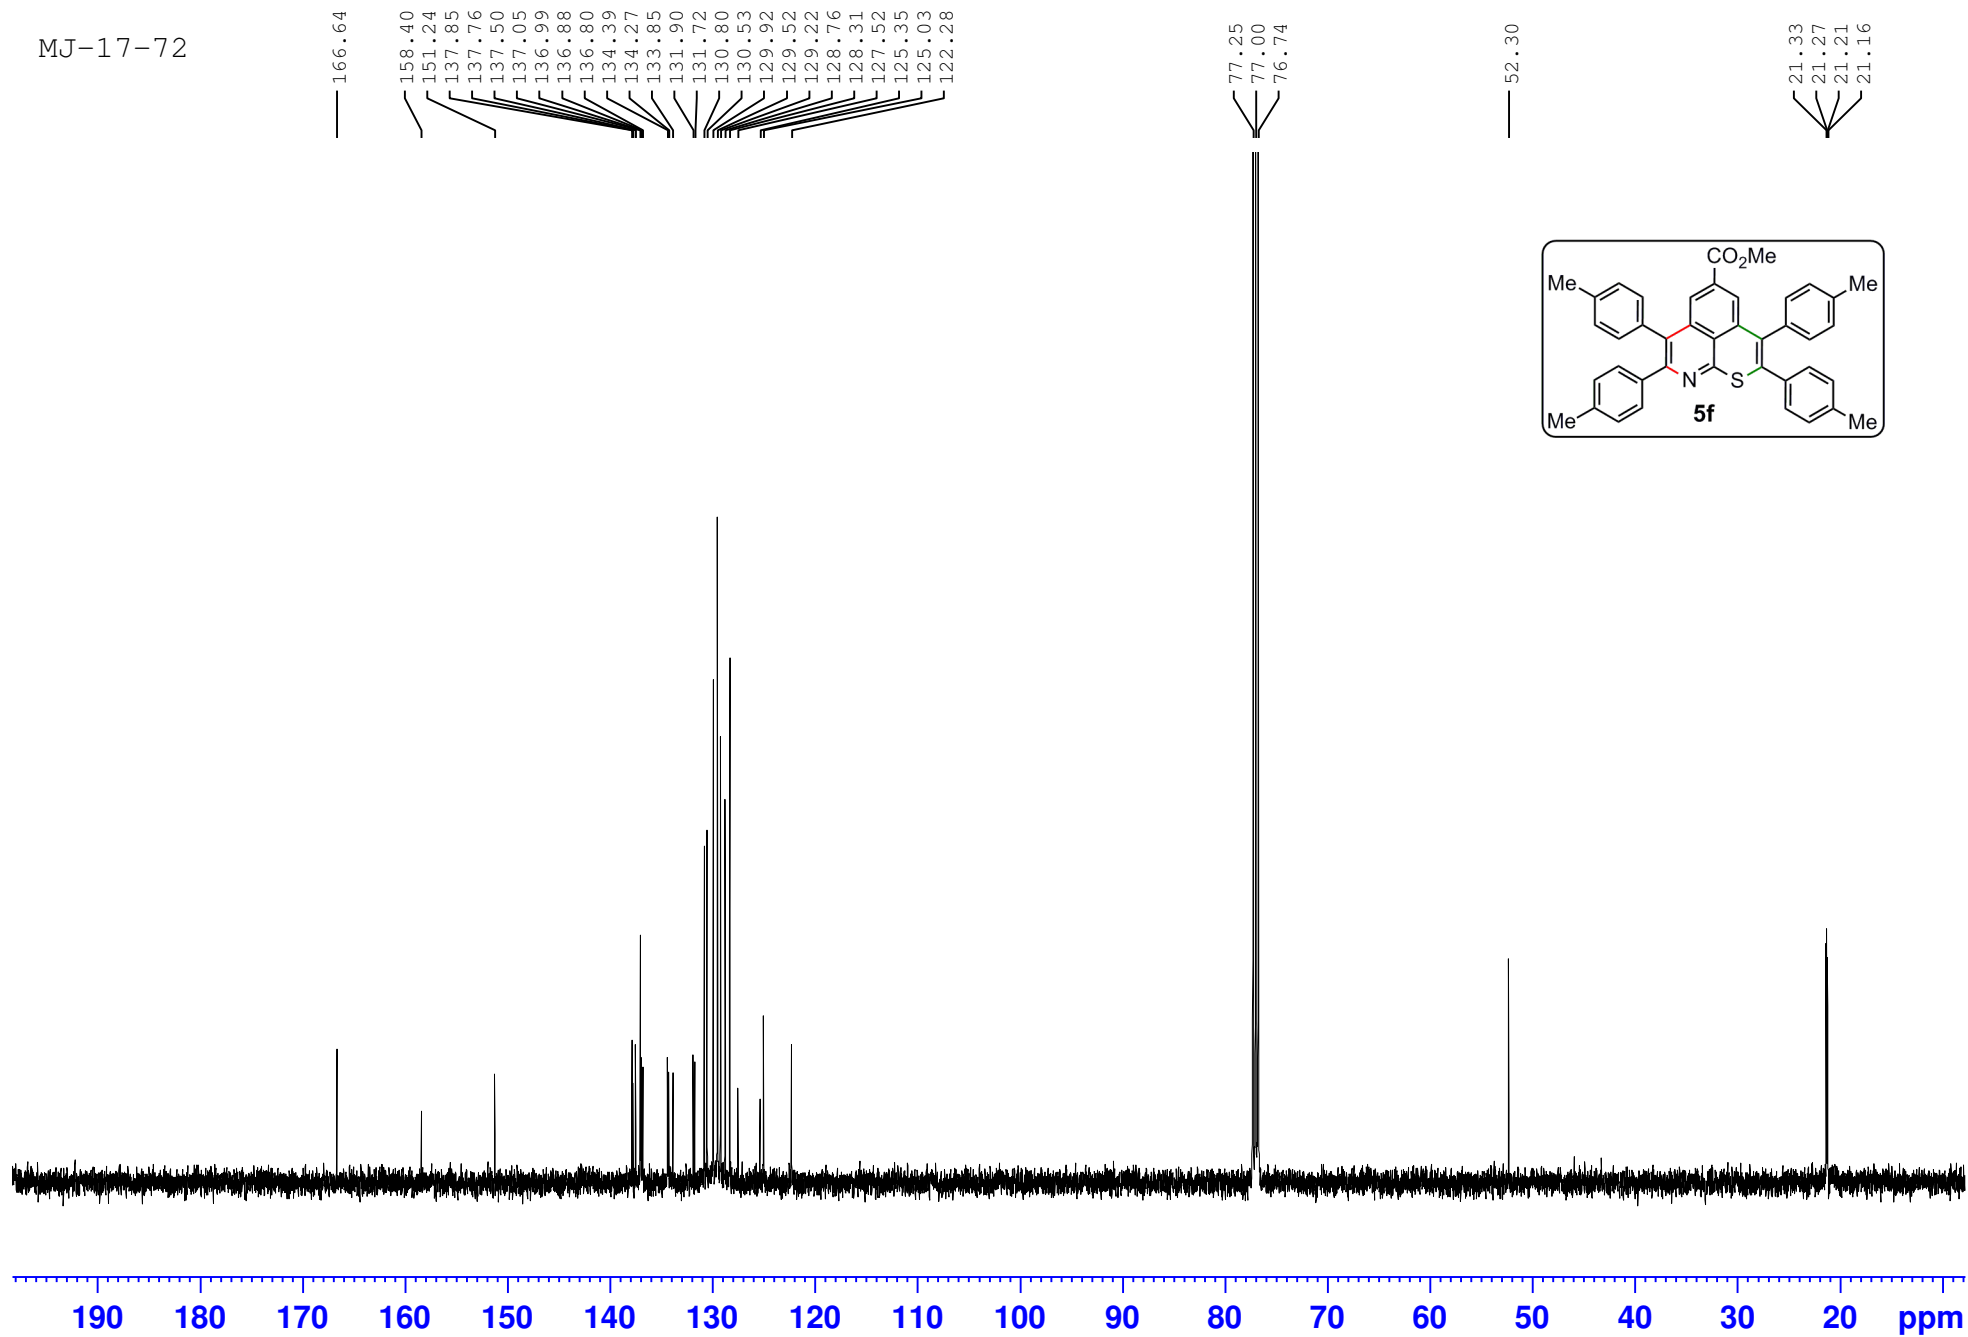

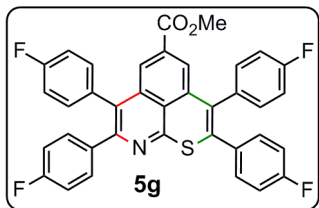

7.906  
7.902  
7.358  
7.354  
7.284  
7.271  
7.262  
7.259  
7.249  
7.174  
7.162  
7.152  
7.140  
7.125  
7.103  
7.081  
7.072  
7.058  
7.038  
7.016  
6.994  
6.917  
6.895  
6.873

— 3.770

MJ-17-248

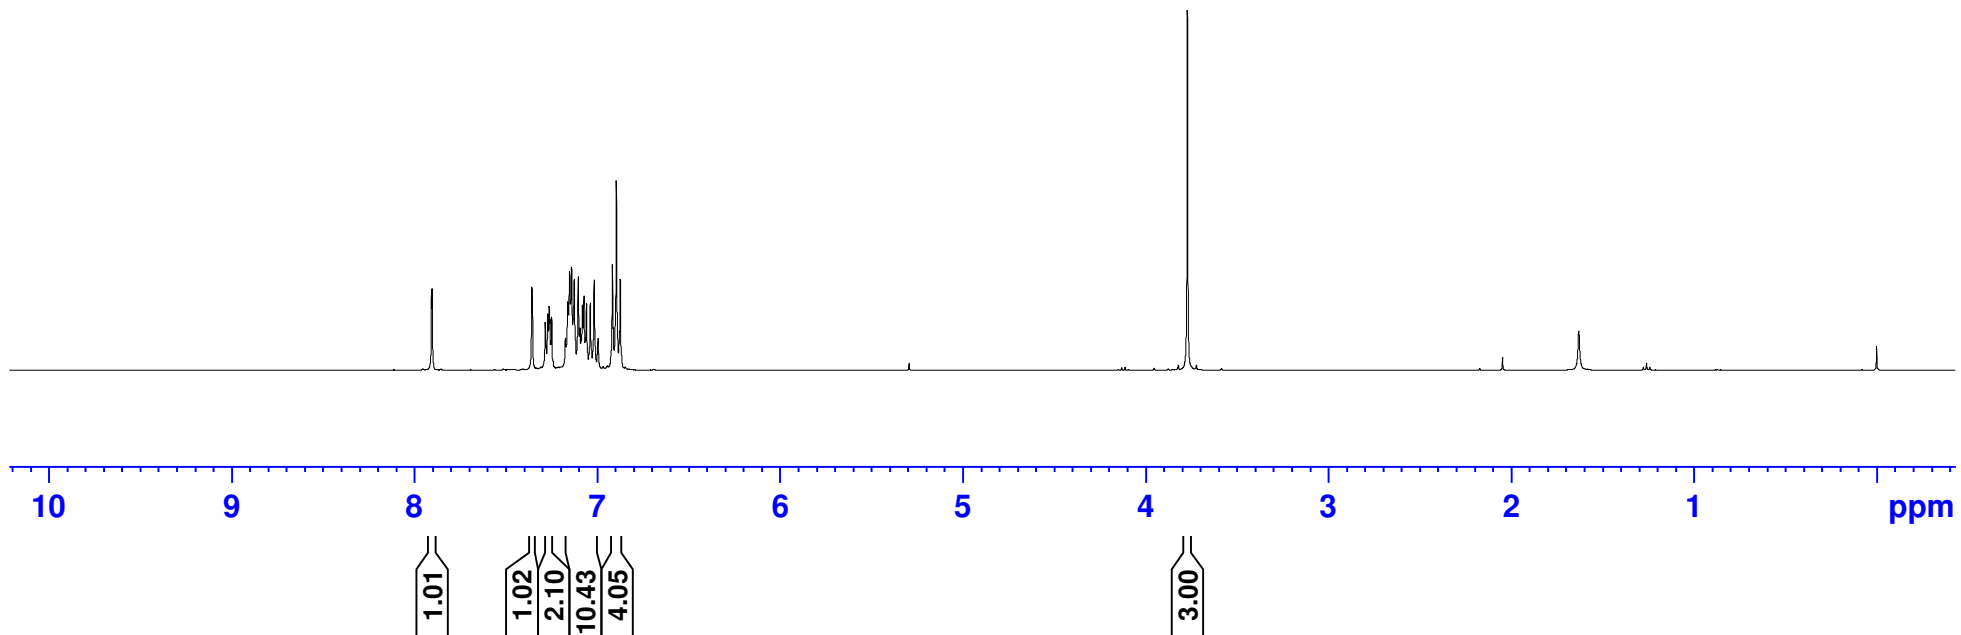

166.18  
163.53  
163.49  
163.46  
163.24  
161.05  
161.02  
160.99  
160.78  
158.54  
150.65  
137.59  
137.01  
136.51  
135.42  
135.39  
132.75  
132.73  
132.72  
132.68  
132.60  
132.40  
132.37  
131.82  
131.74  
131.44  
131.23  
131.15  
126.84  
125.39  
125.04  
122.60  
116.27  
116.05  
115.56  
115.34  
114.86  
114.64

77.32  
77.00  
76.68

52.52

MJ-17-248

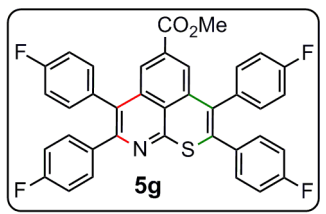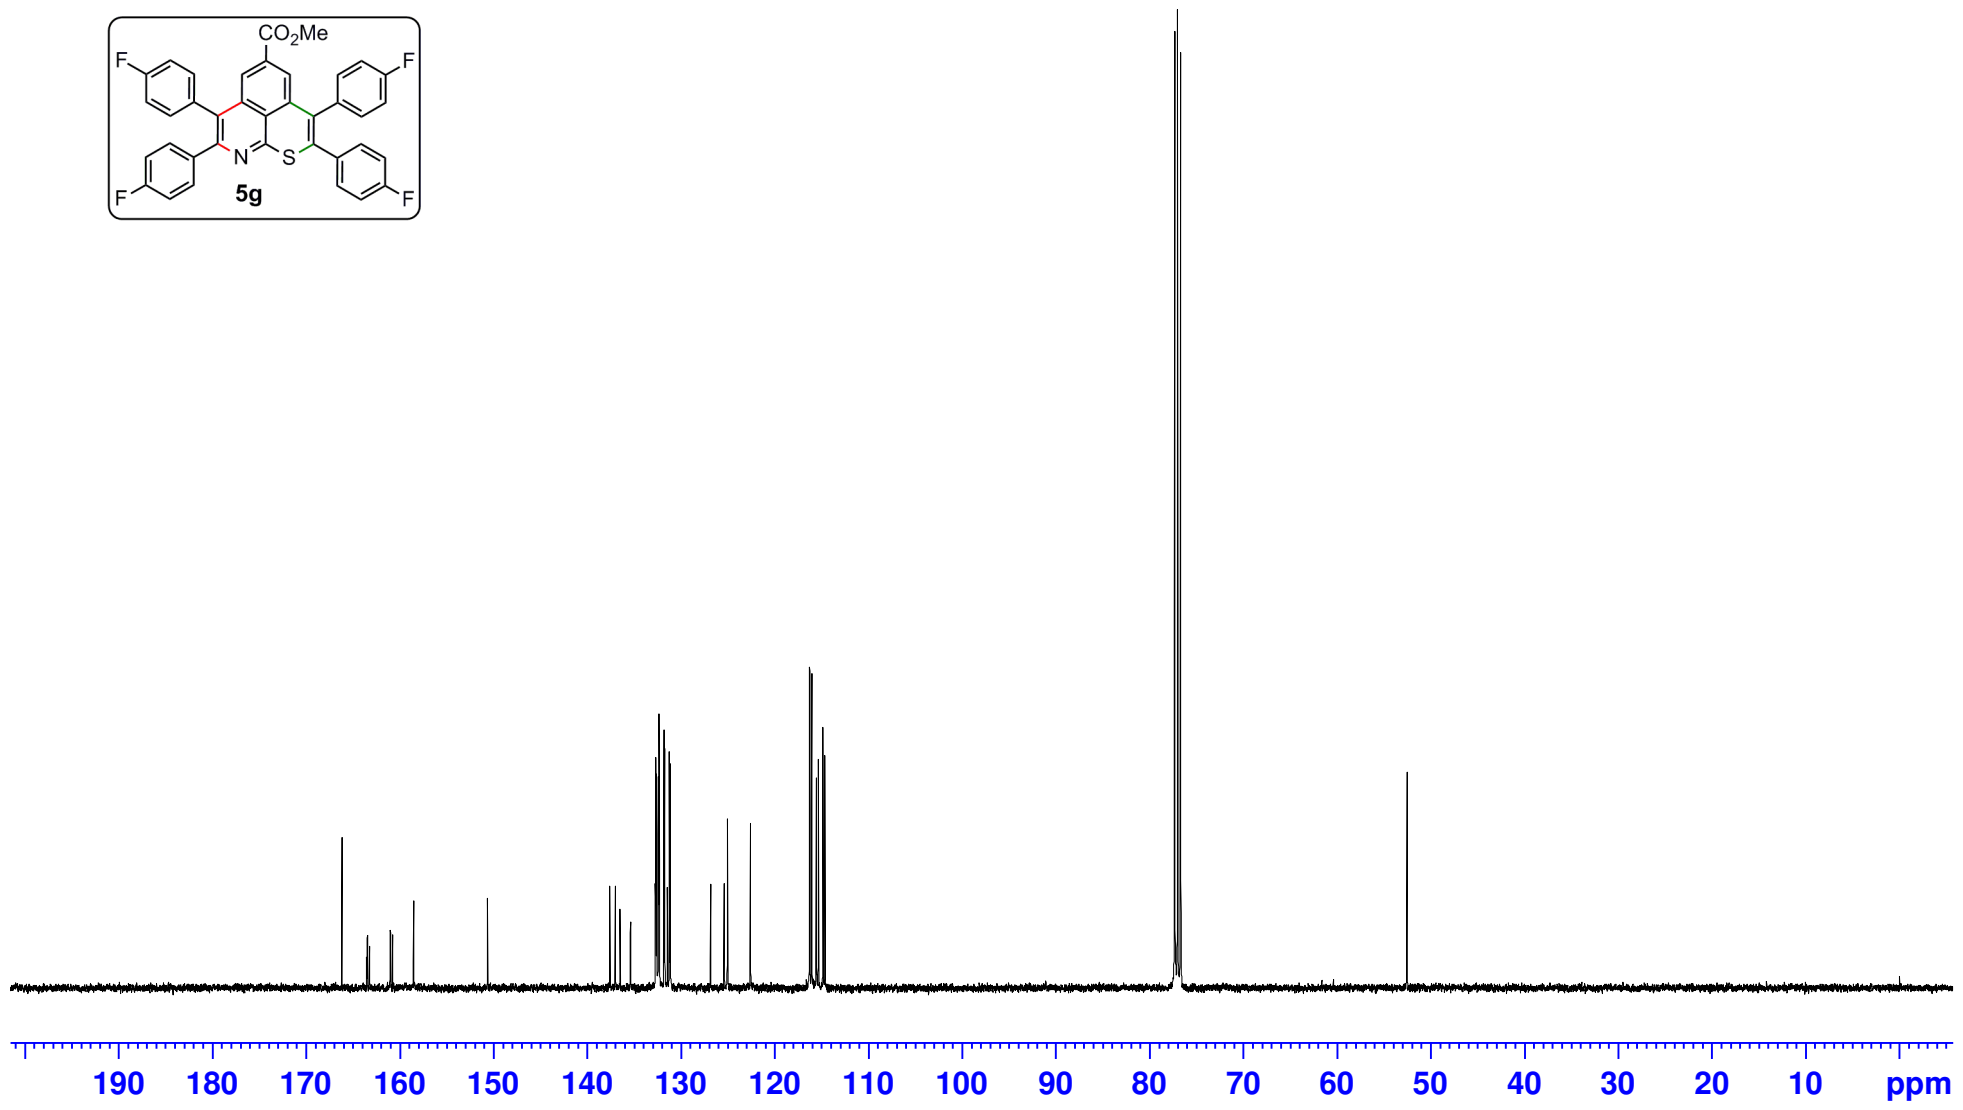

MJ-17-248

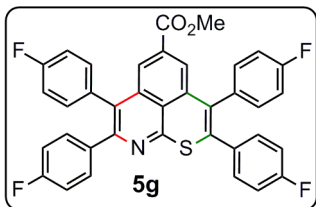

— -111.95

— -113.46  
— -113.49

— -113.86

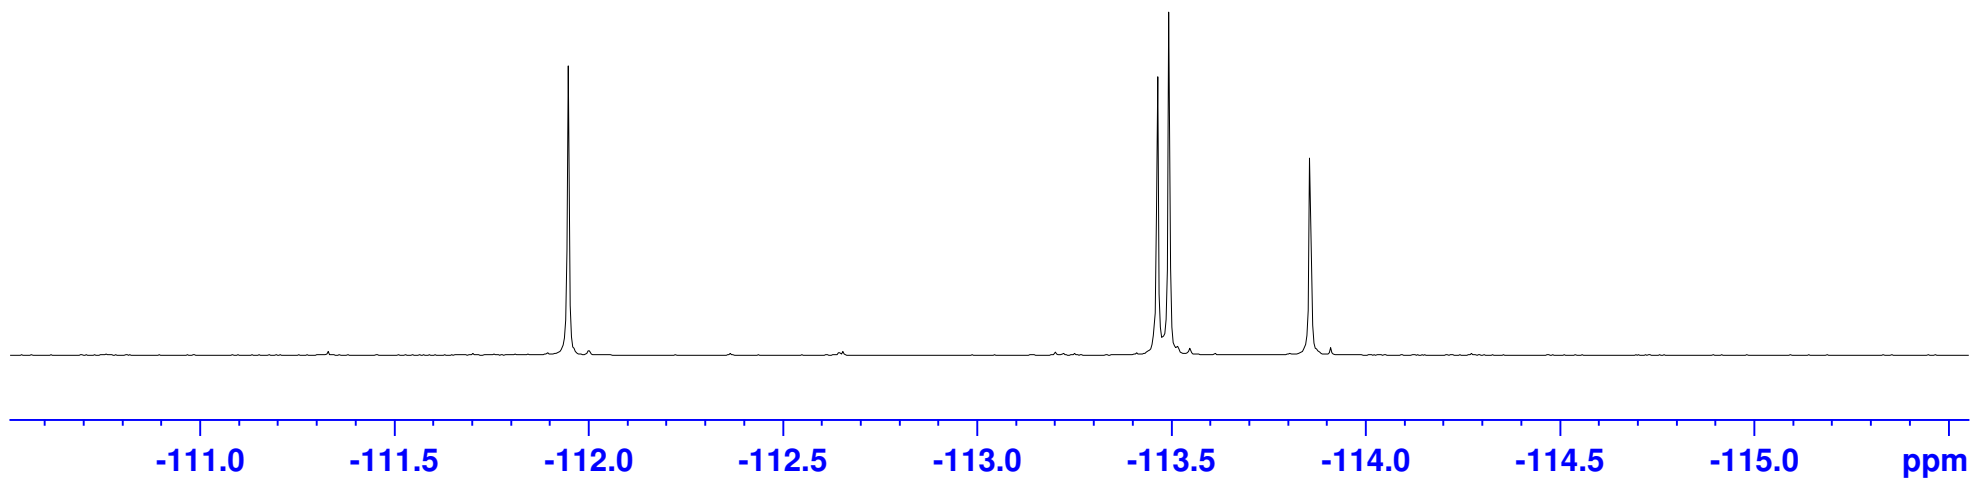

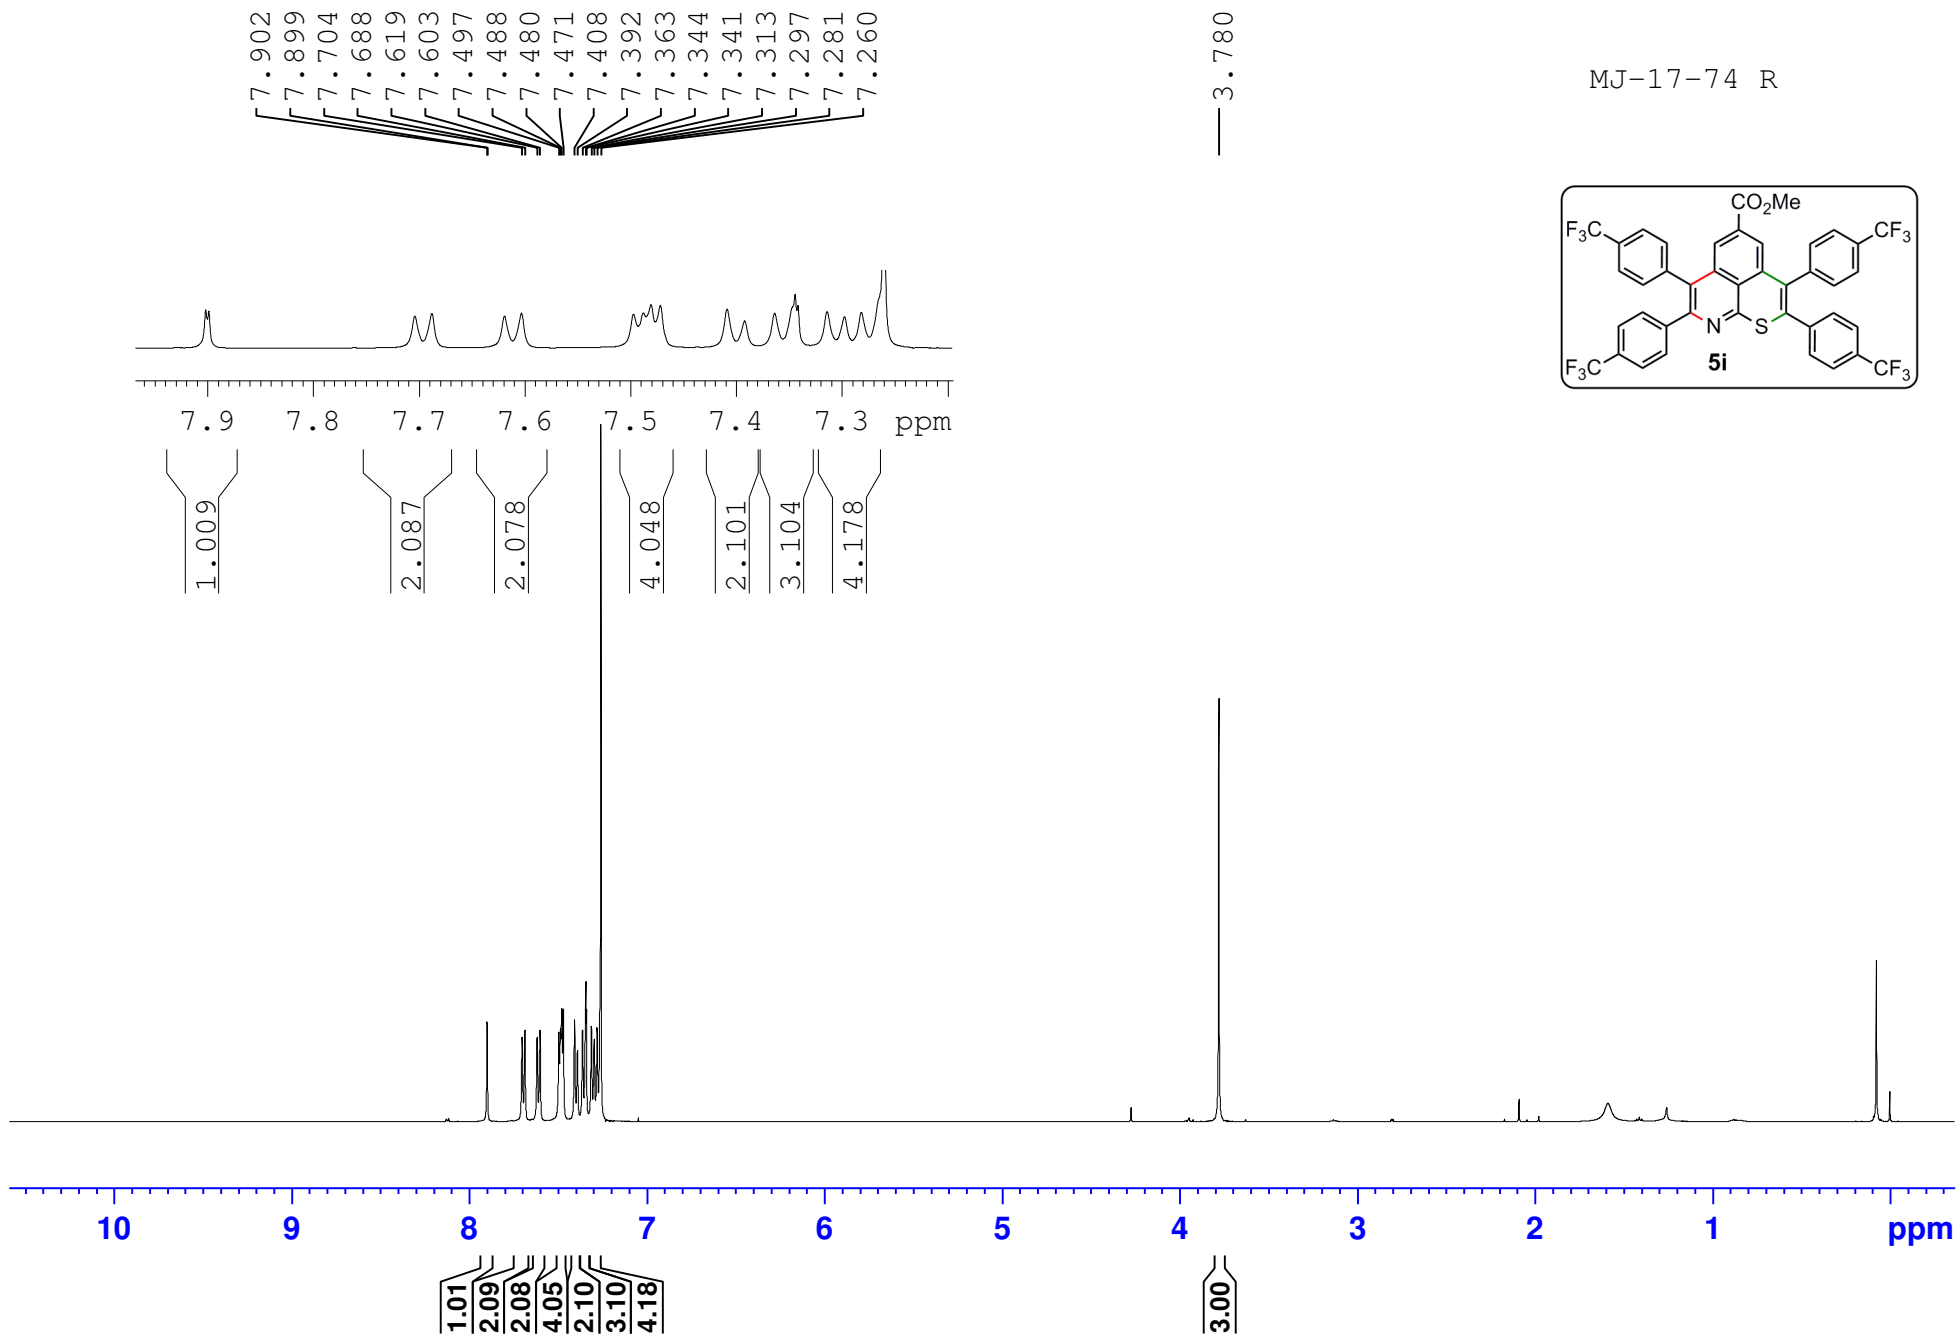

MJ-17-74 R

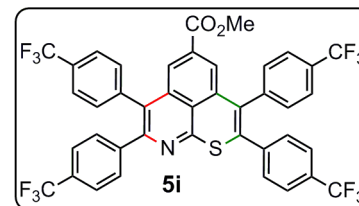

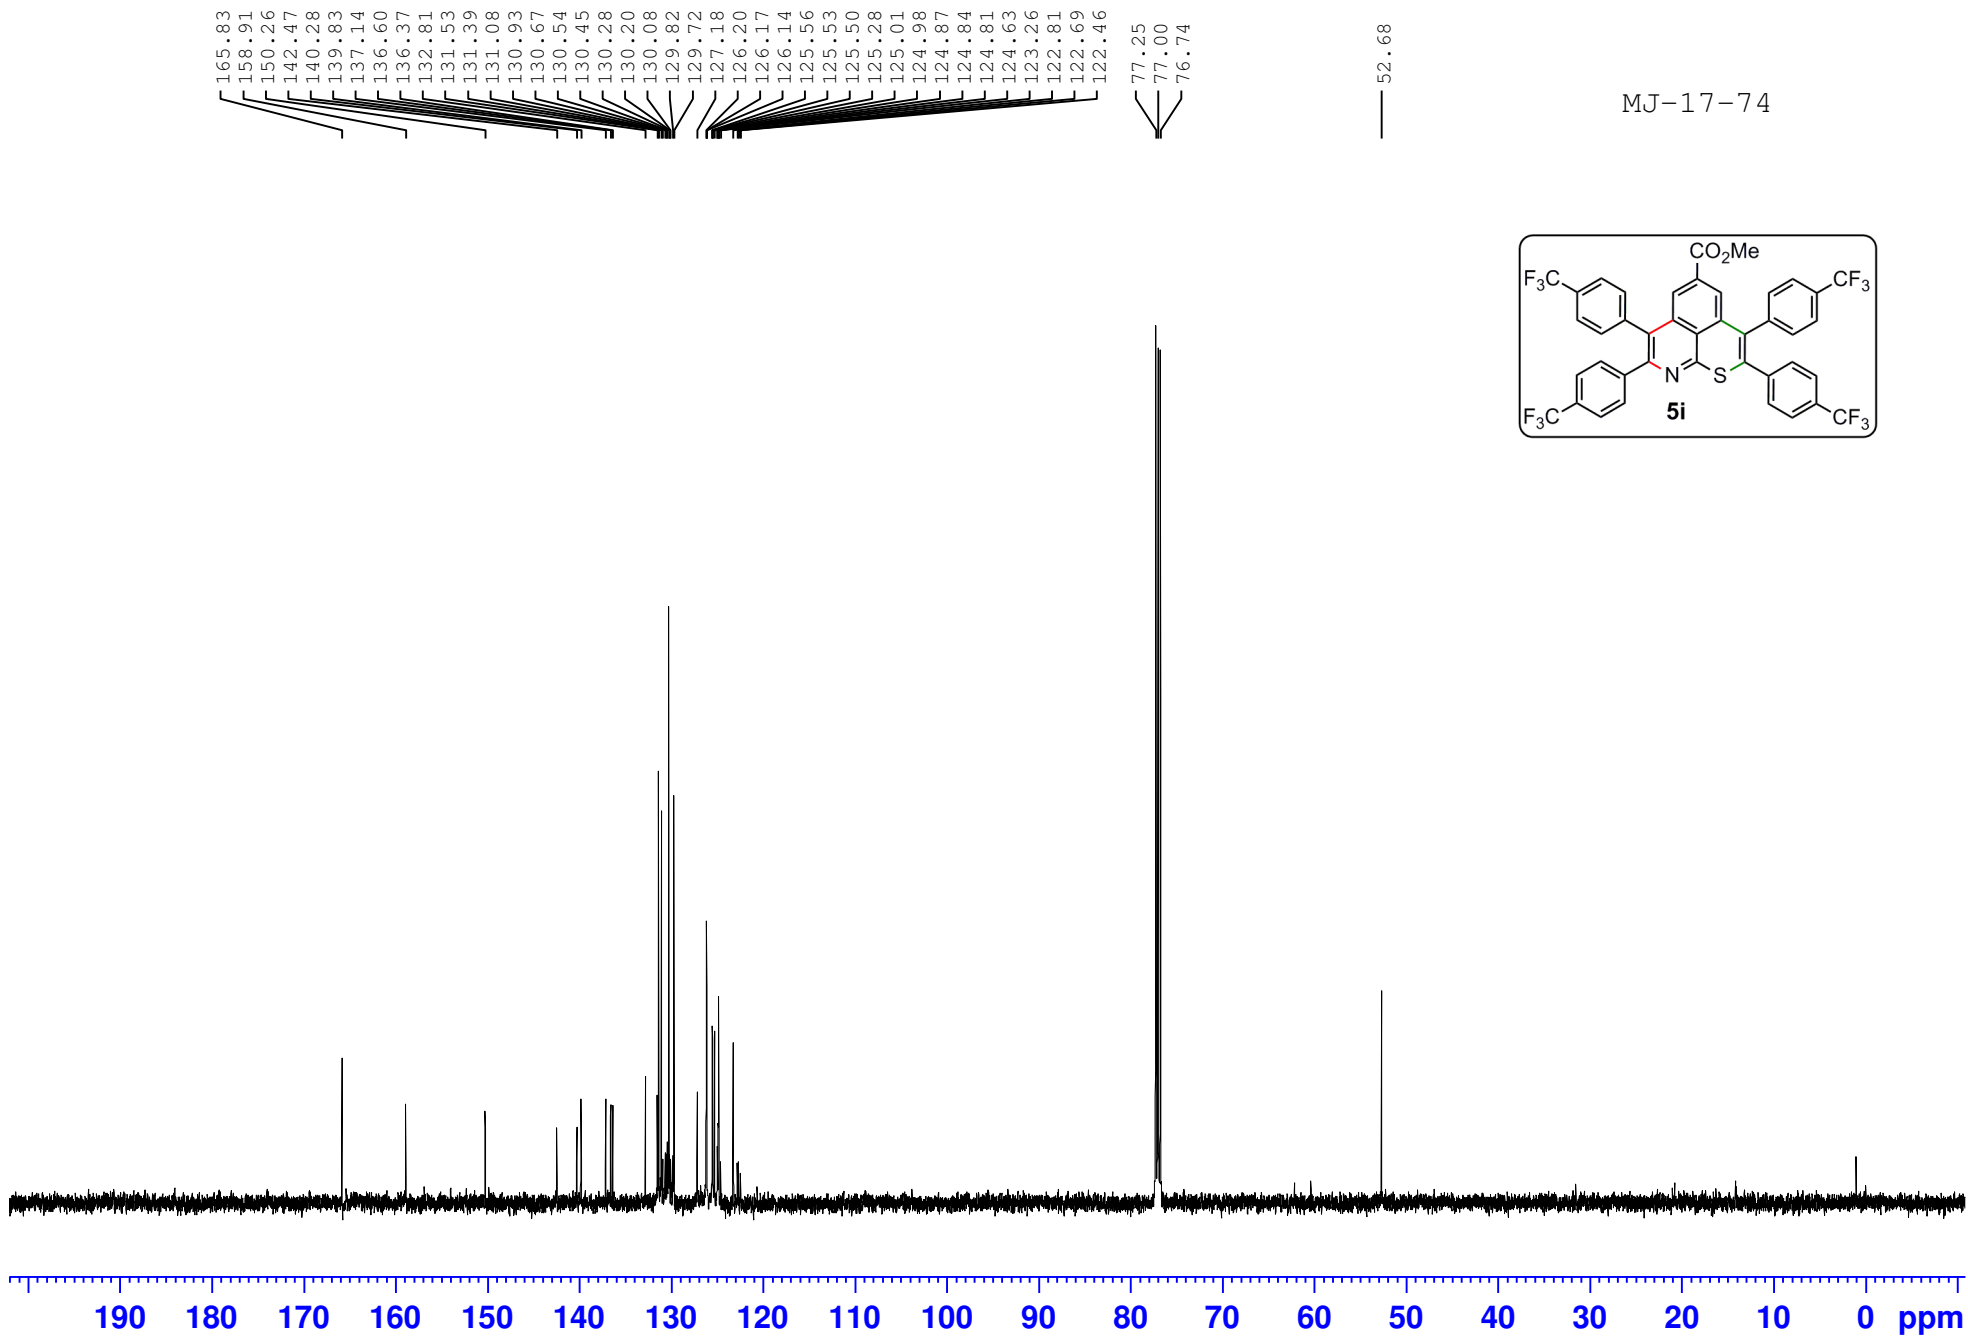

MJ-17-74

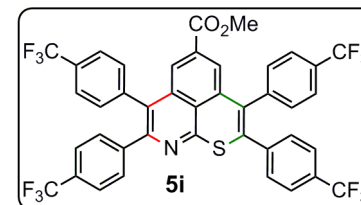

Majji-MJ-17-74

-62.59  
-62.71  
-62.73  
-62.93

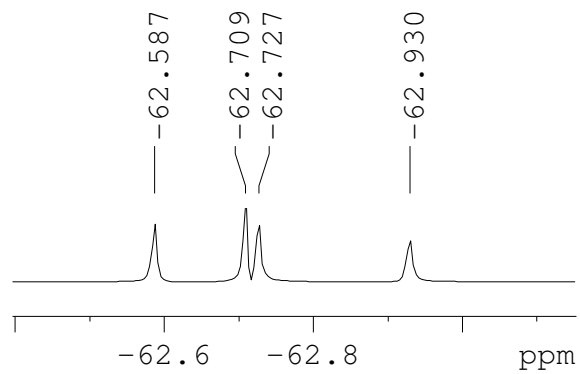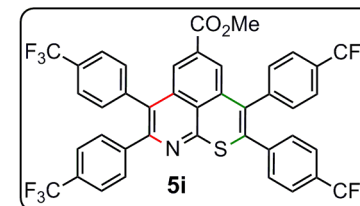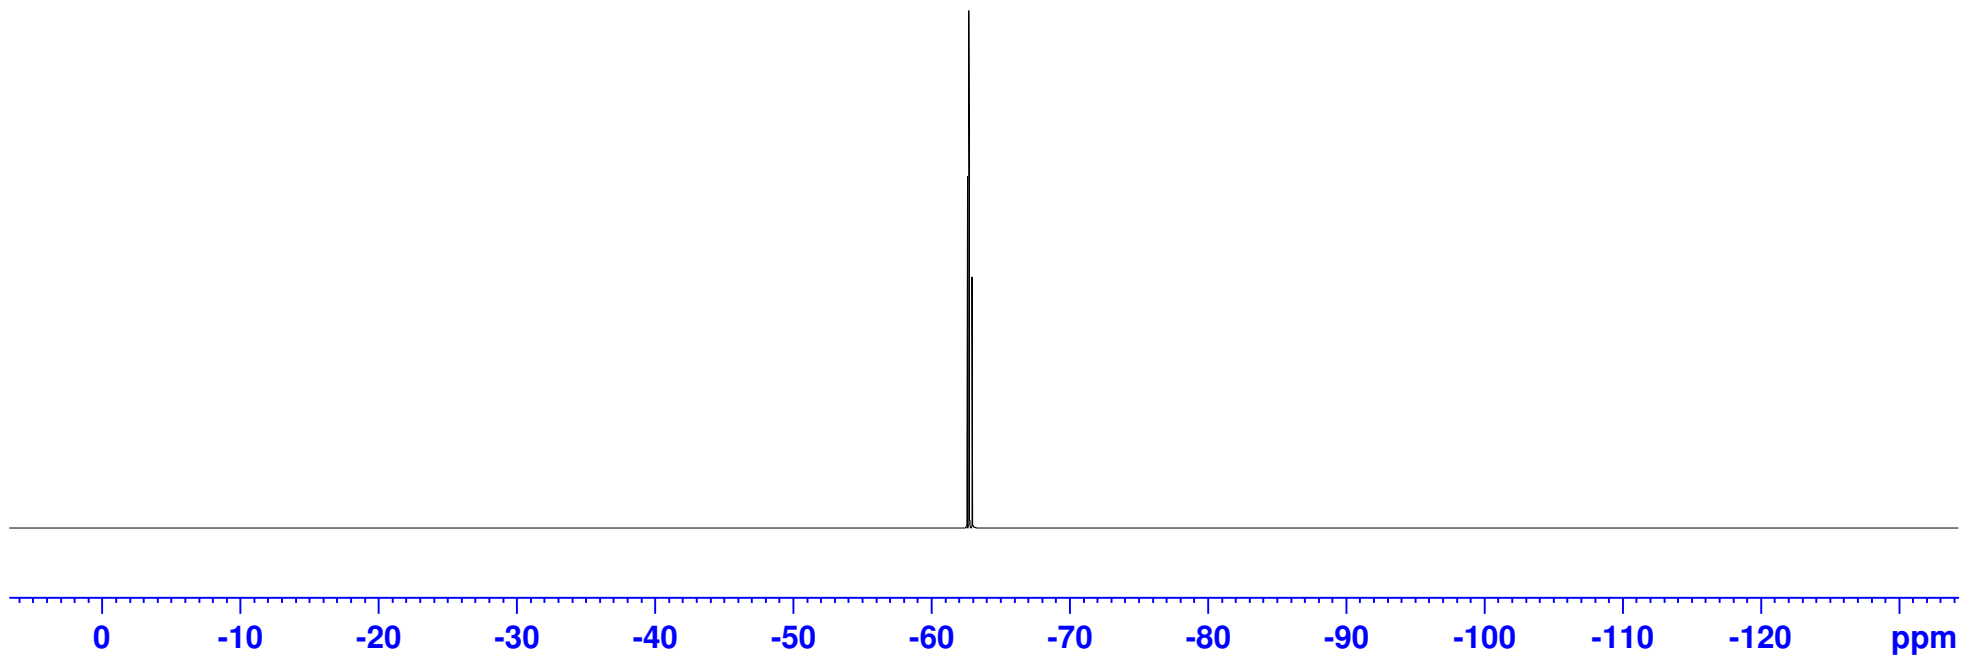



7.924  
7.417  
7.402  
7.385  
7.337  
7.322  
7.309  
7.294  
7.260  
7.213  
7.198  
7.185  
7.163  
7.150  
7.135  
7.111  
7.090  
7.079  
7.058  
7.042  
7.020  
6.998  
6.983  
6.949  
6.933  
6.918  
6.900  
6.849  
6.832

3.771

MAJJI-17-246 RR

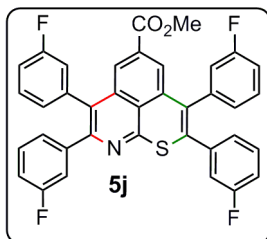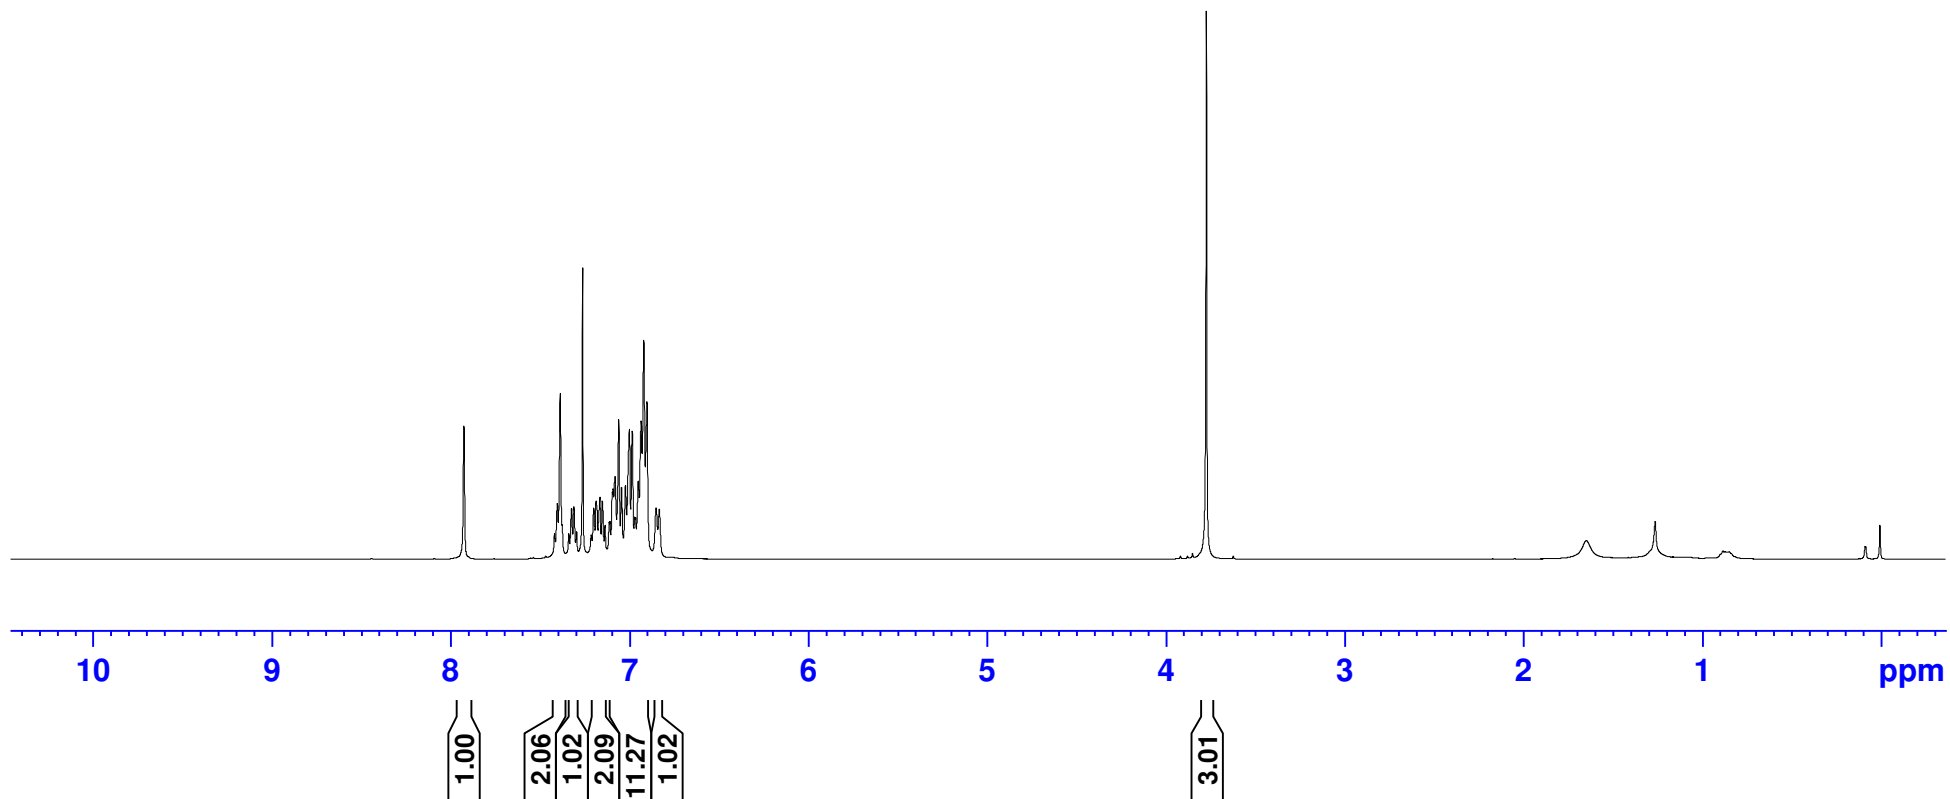

166.02  
164.07  
163.25  
163.24  
162.10  
161.30  
161.27  
158.68  
150.11  
141.36  
141.30  
138.80  
138.74  
138.46  
138.41  
138.35  
137.26  
136.52  
136.24  
132.55  
131.28  
130.70  
130.67  
130.64  
130.61  
130.03  
129.97  
129.23  
129.17  
126.96  
126.75  
126.42  
125.63  
125.61  
125.46  
125.26  
125.09  
125.07  
122.99  
117.93  
117.76  
117.62  
117.45  
116.97  
116.79  
116.48  
116.30  
115.75  
115.58  
115.20  
115.11  
115.04  
114.94  
114.88  
114.72  
77.25  
77.00  
76.74

52.52

MAJJI-17-246 RR

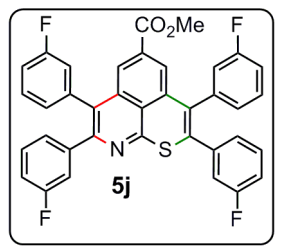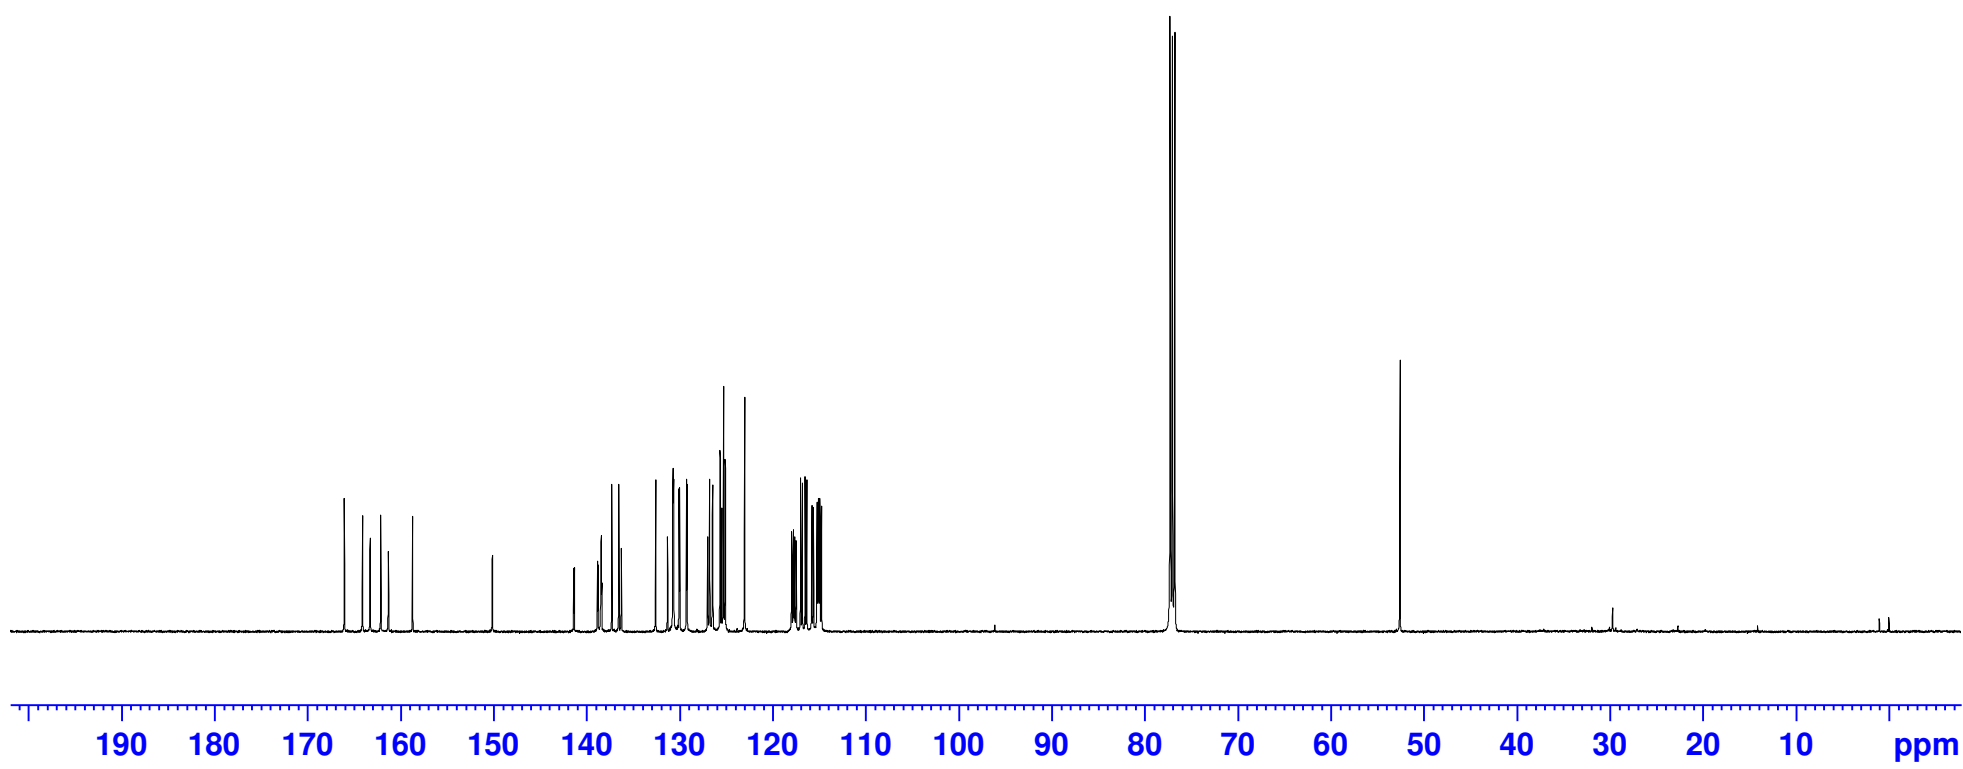

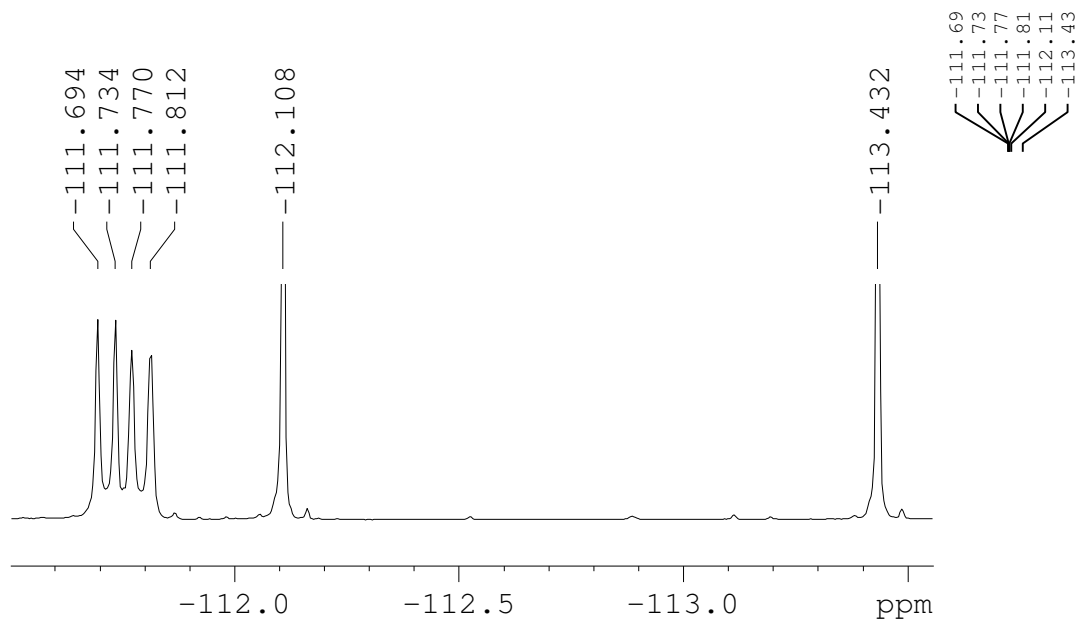

MJ-17-246 R

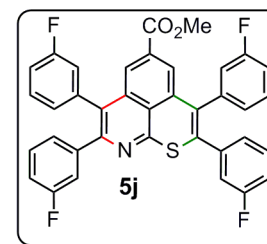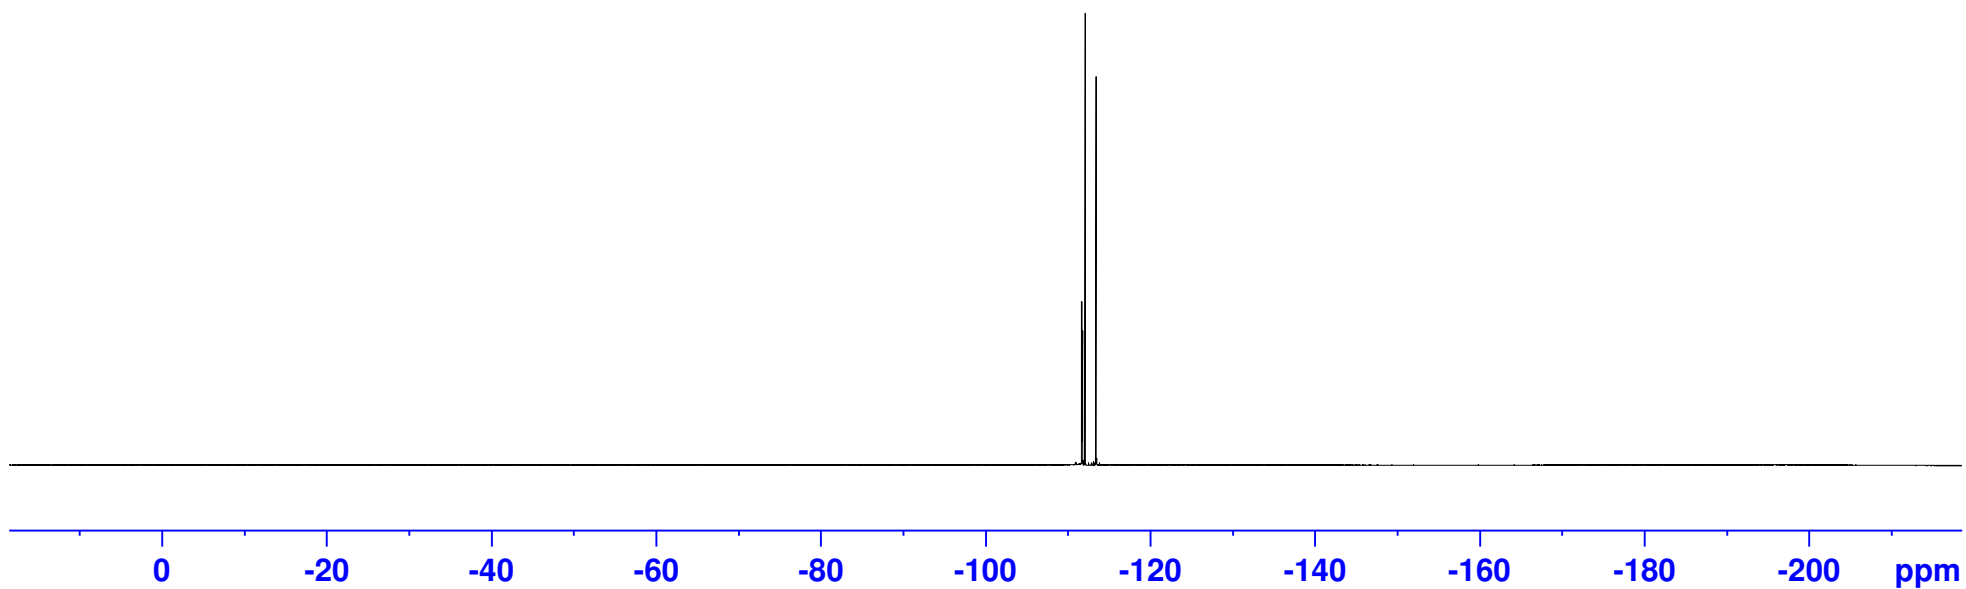

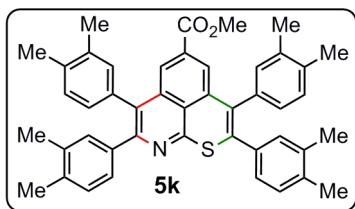

7.915  
7.913  
7.374  
7.372  
7.260  
7.241  
7.135  
7.120  
7.049  
7.034  
7.018  
6.973  
6.960  
6.923  
6.909  
6.891  
6.876  
6.853  
6.838

— 3.740

2.303  
2.236  
2.225  
2.184  
2.165  
2.132

MJ-17-101

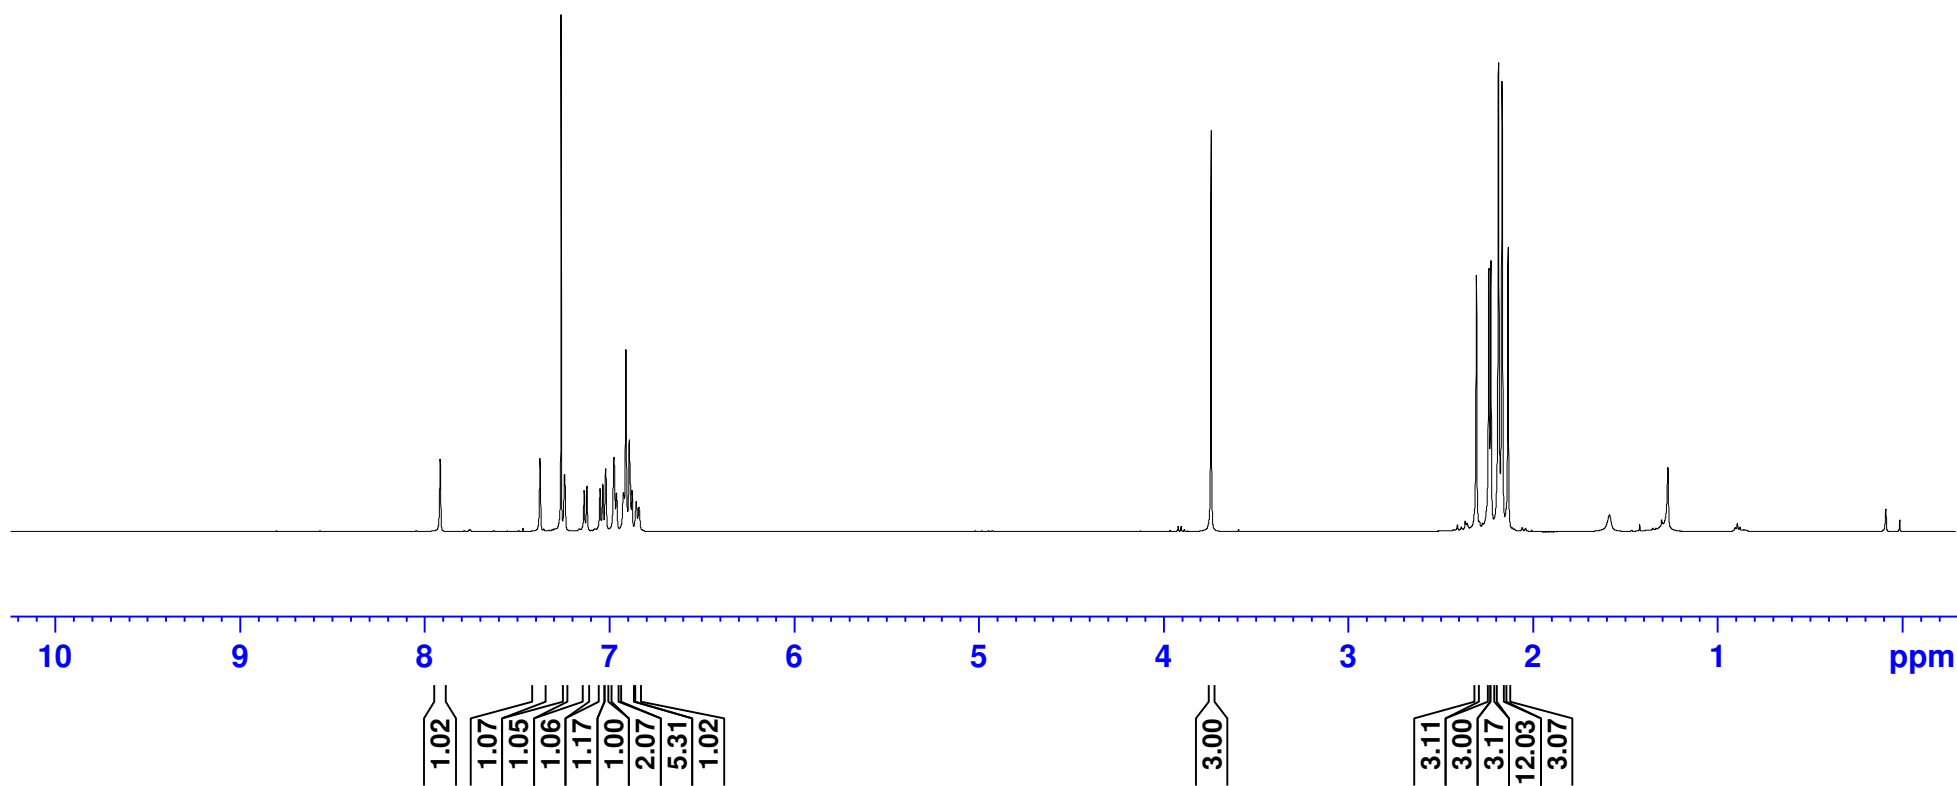

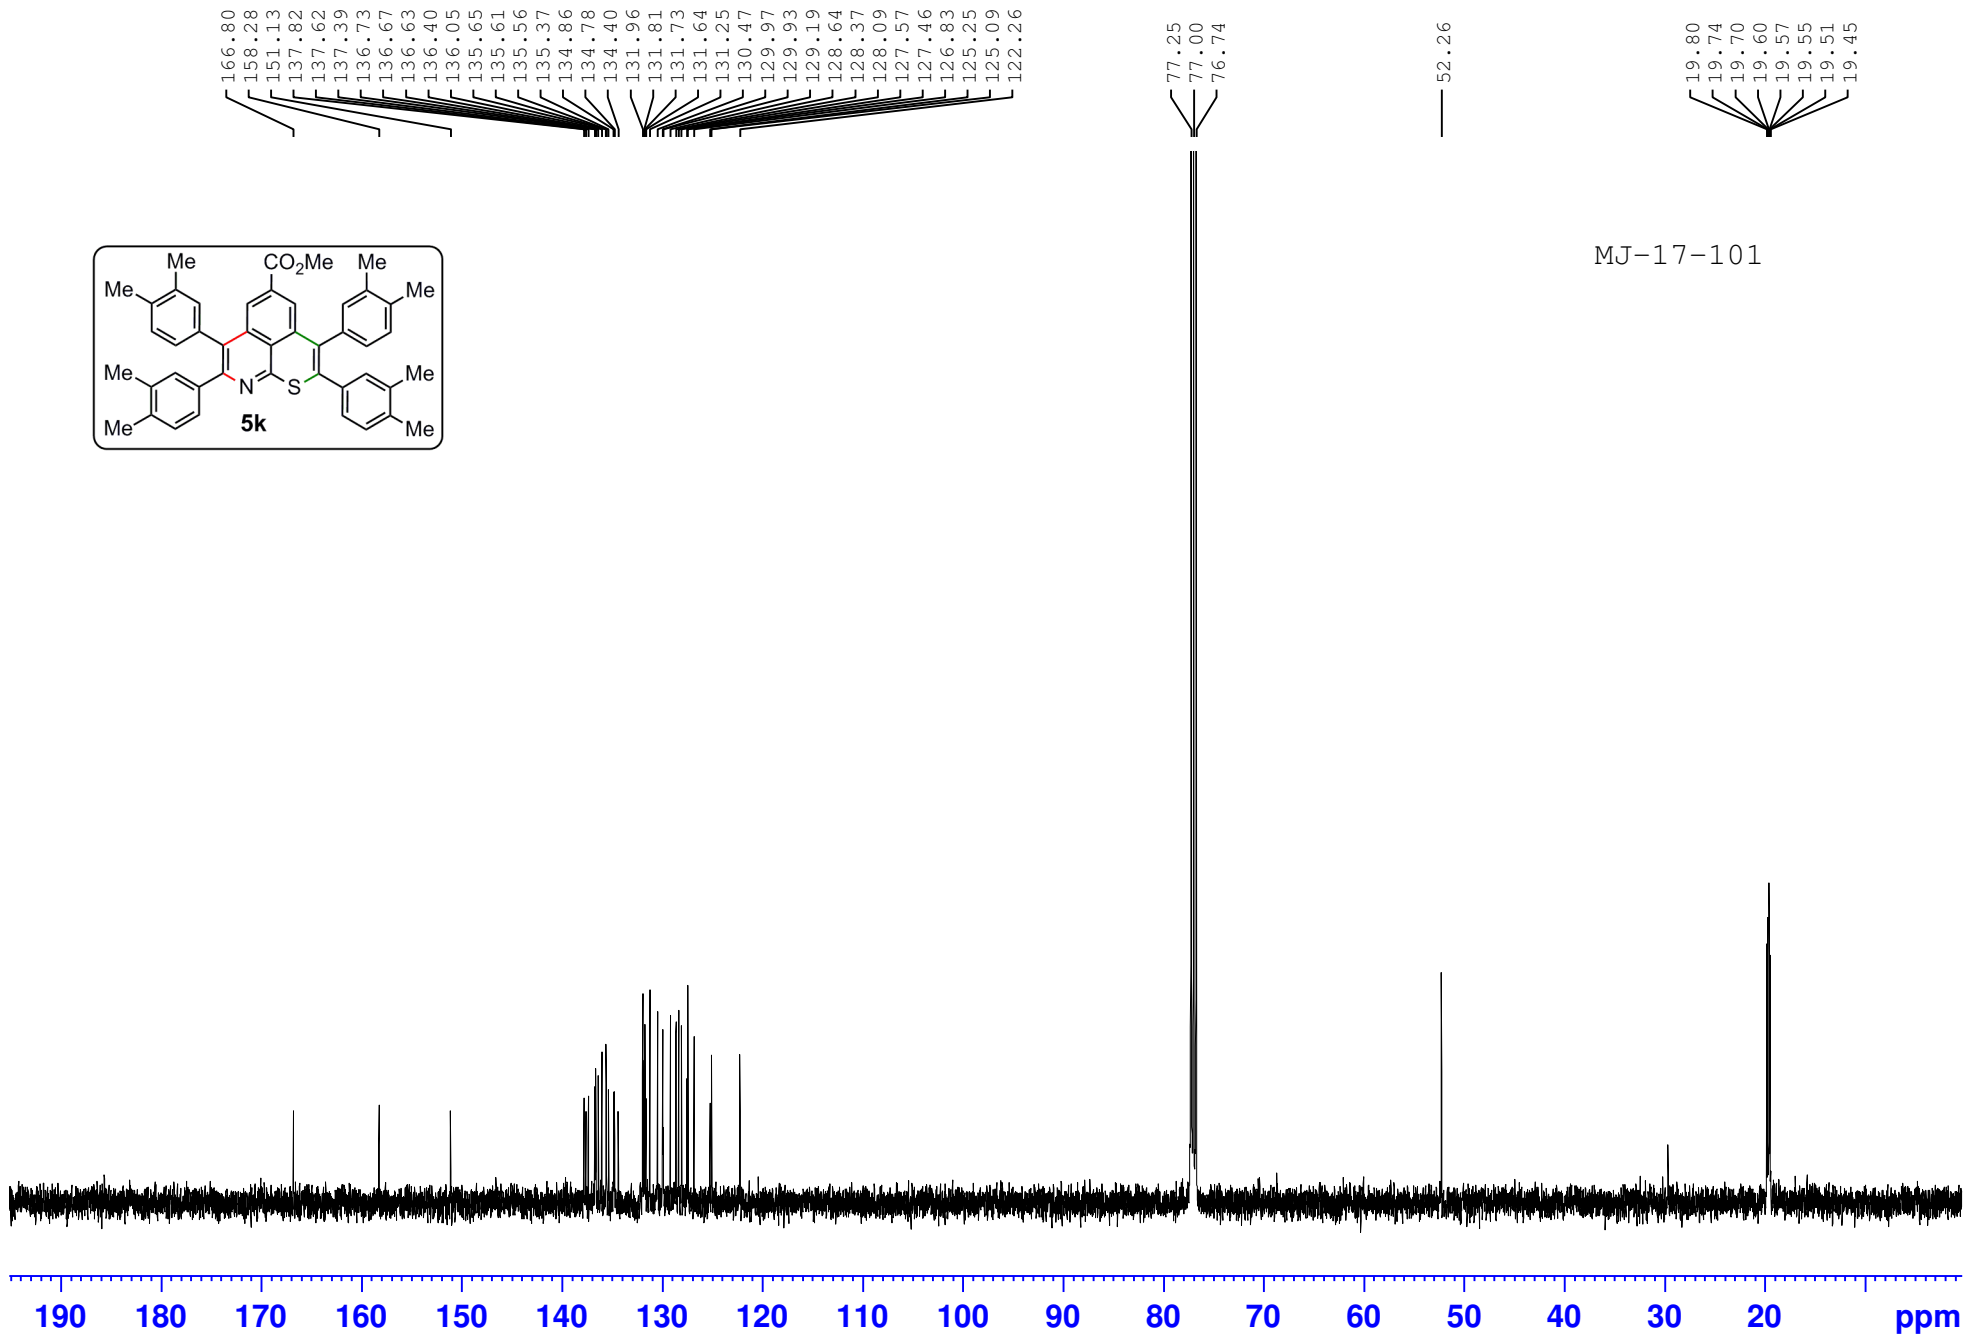

7.736  
7.722  
7.562  
7.548  
7.477  
7.462  
7.447  
7.427  
7.412  
7.379  
7.376  
7.372  
7.369  
7.365  
7.360  
7.334  
7.319  
7.303  
7.294  
7.279  
7.260  
7.224  
7.217  
7.211  
7.200  
7.185  
6.864

2.219

AS-600(major)

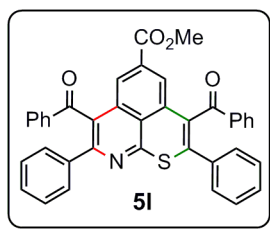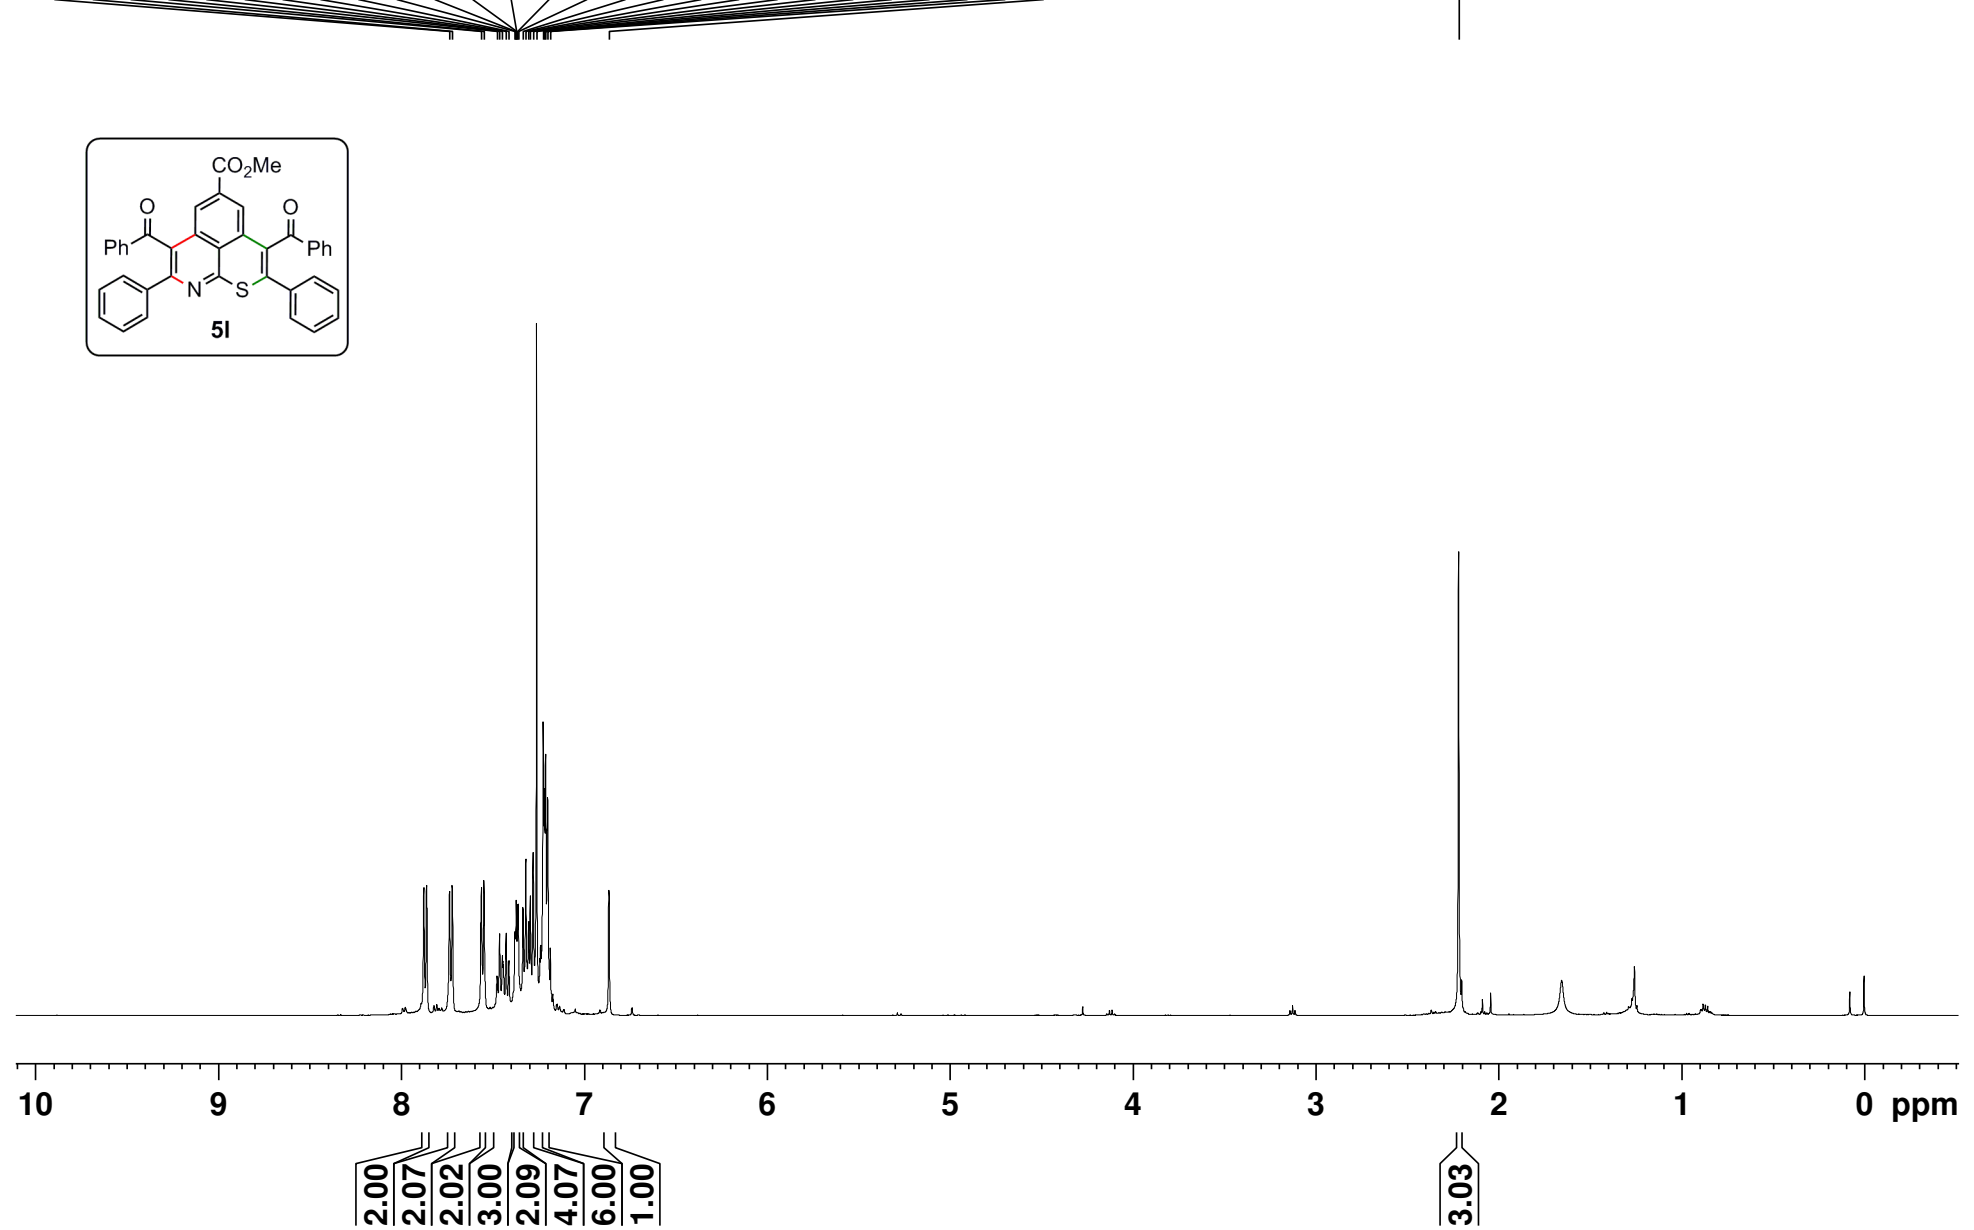

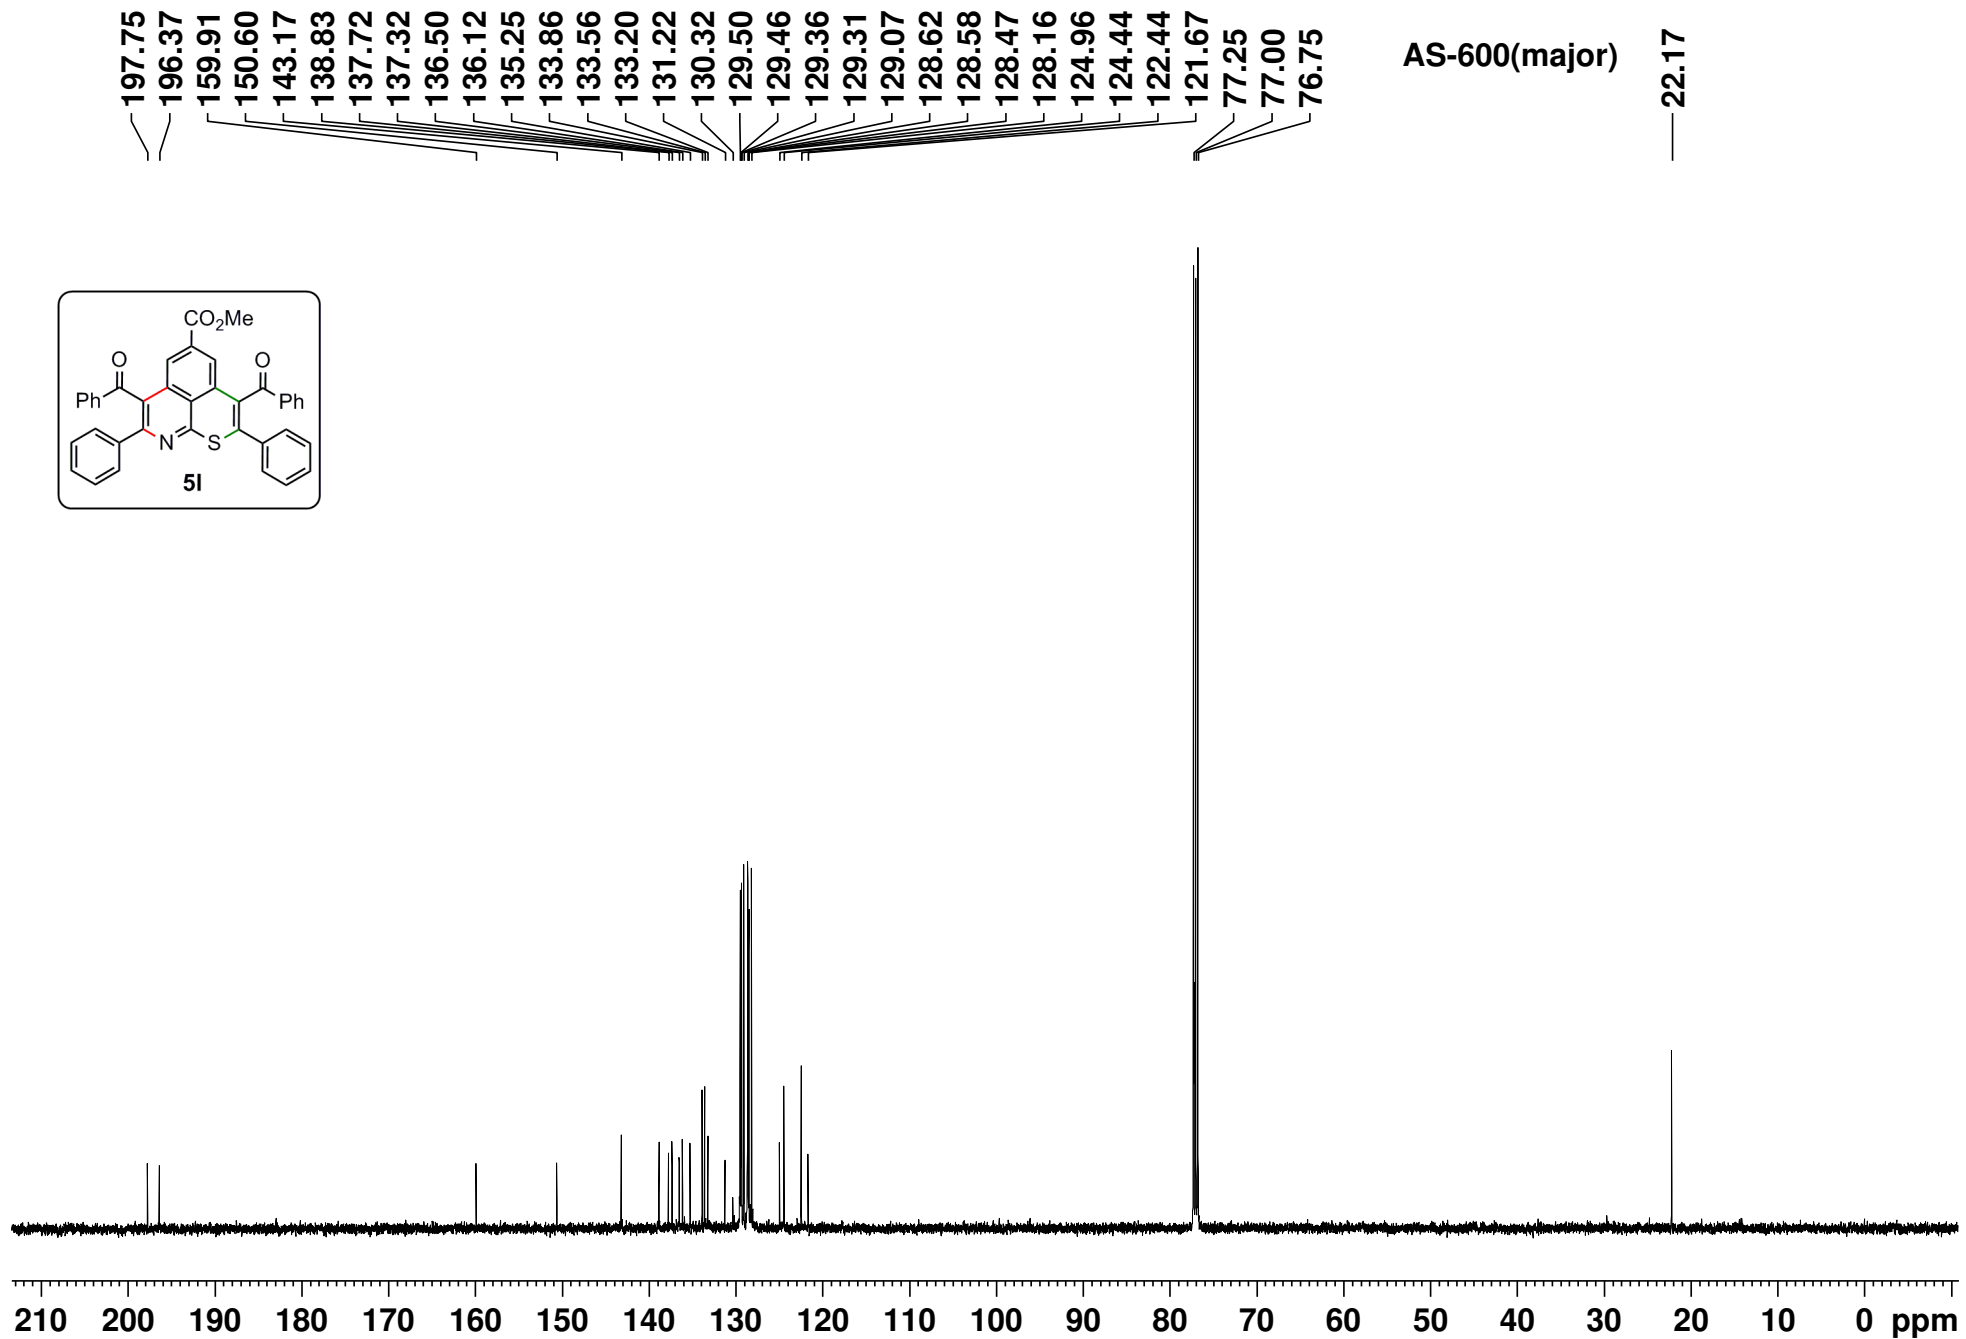

8.372  
8.222  
7.946  
7.553  
7.539  
7.525  
7.510  
7.482  
7.468  
7.453  
7.442  
7.438  
7.427  
7.416  
7.401  
7.260  
7.211  
7.208  
7.194  
7.158  
7.156

4.015  
3.841

2.500  
2.455  
2.131  
1.910

Majji-MJ-17-102

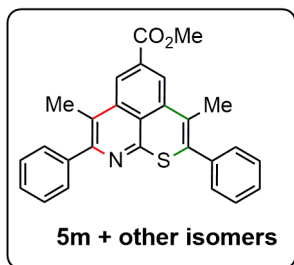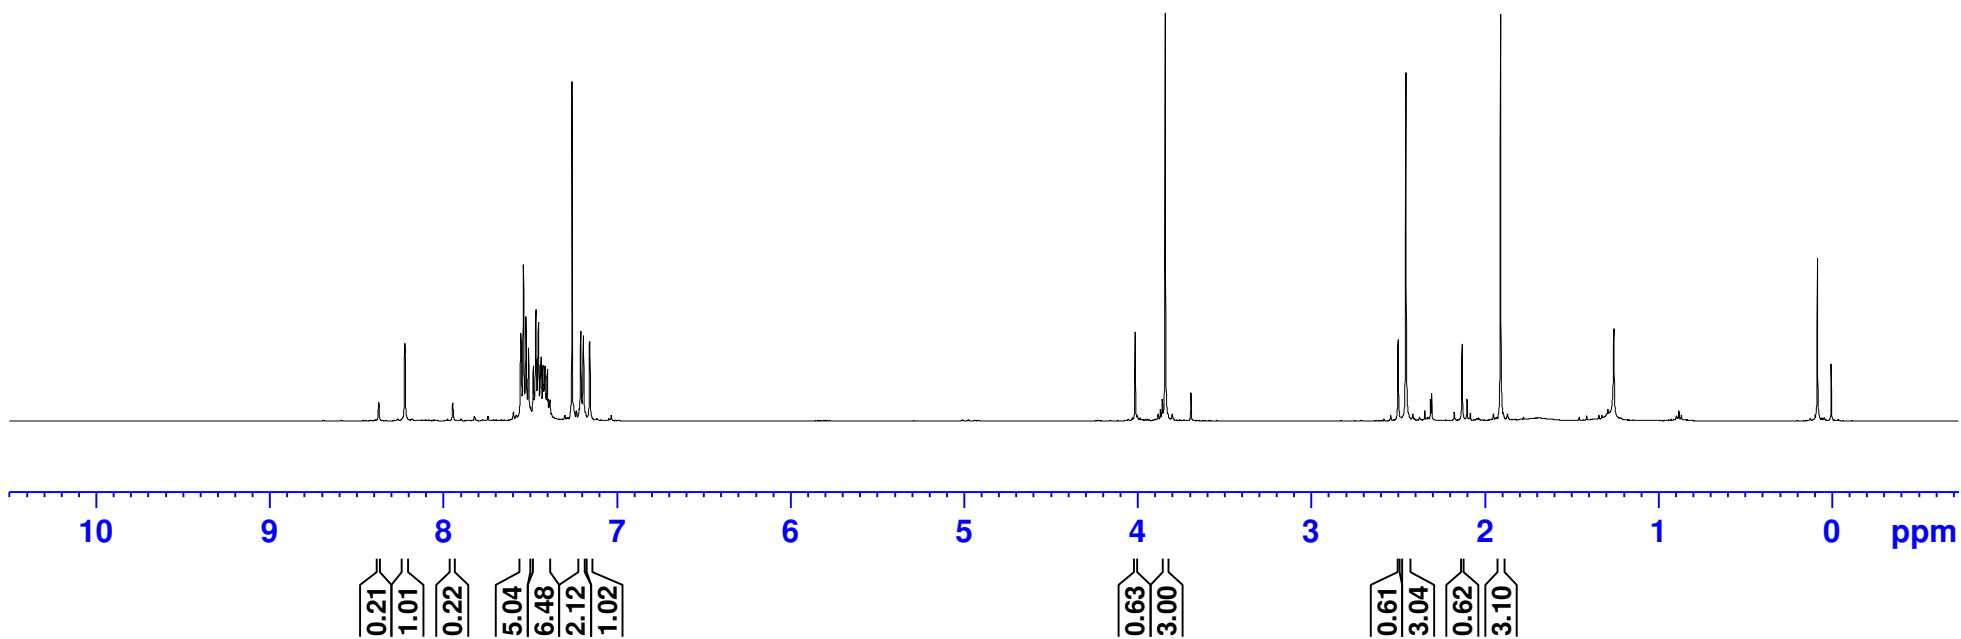



166.85  
166.64  
156.30  
156.09  
152.37  
140.37  
137.93  
137.72  
137.43  
135.54  
132.74  
131.98  
131.13  
129.98  
129.77  
129.73  
129.69  
129.57  
129.44  
129.08  
128.71  
128.67  
128.10  
127.85  
124.99  
123.89  
123.31  
122.55  
121.62  
120.87  
119.43

77.25  
77.00  
76.74

52.53  
52.35

22.77  
21.10  
17.51  
15.73

Majji-MJ-17-102

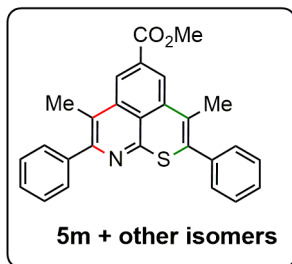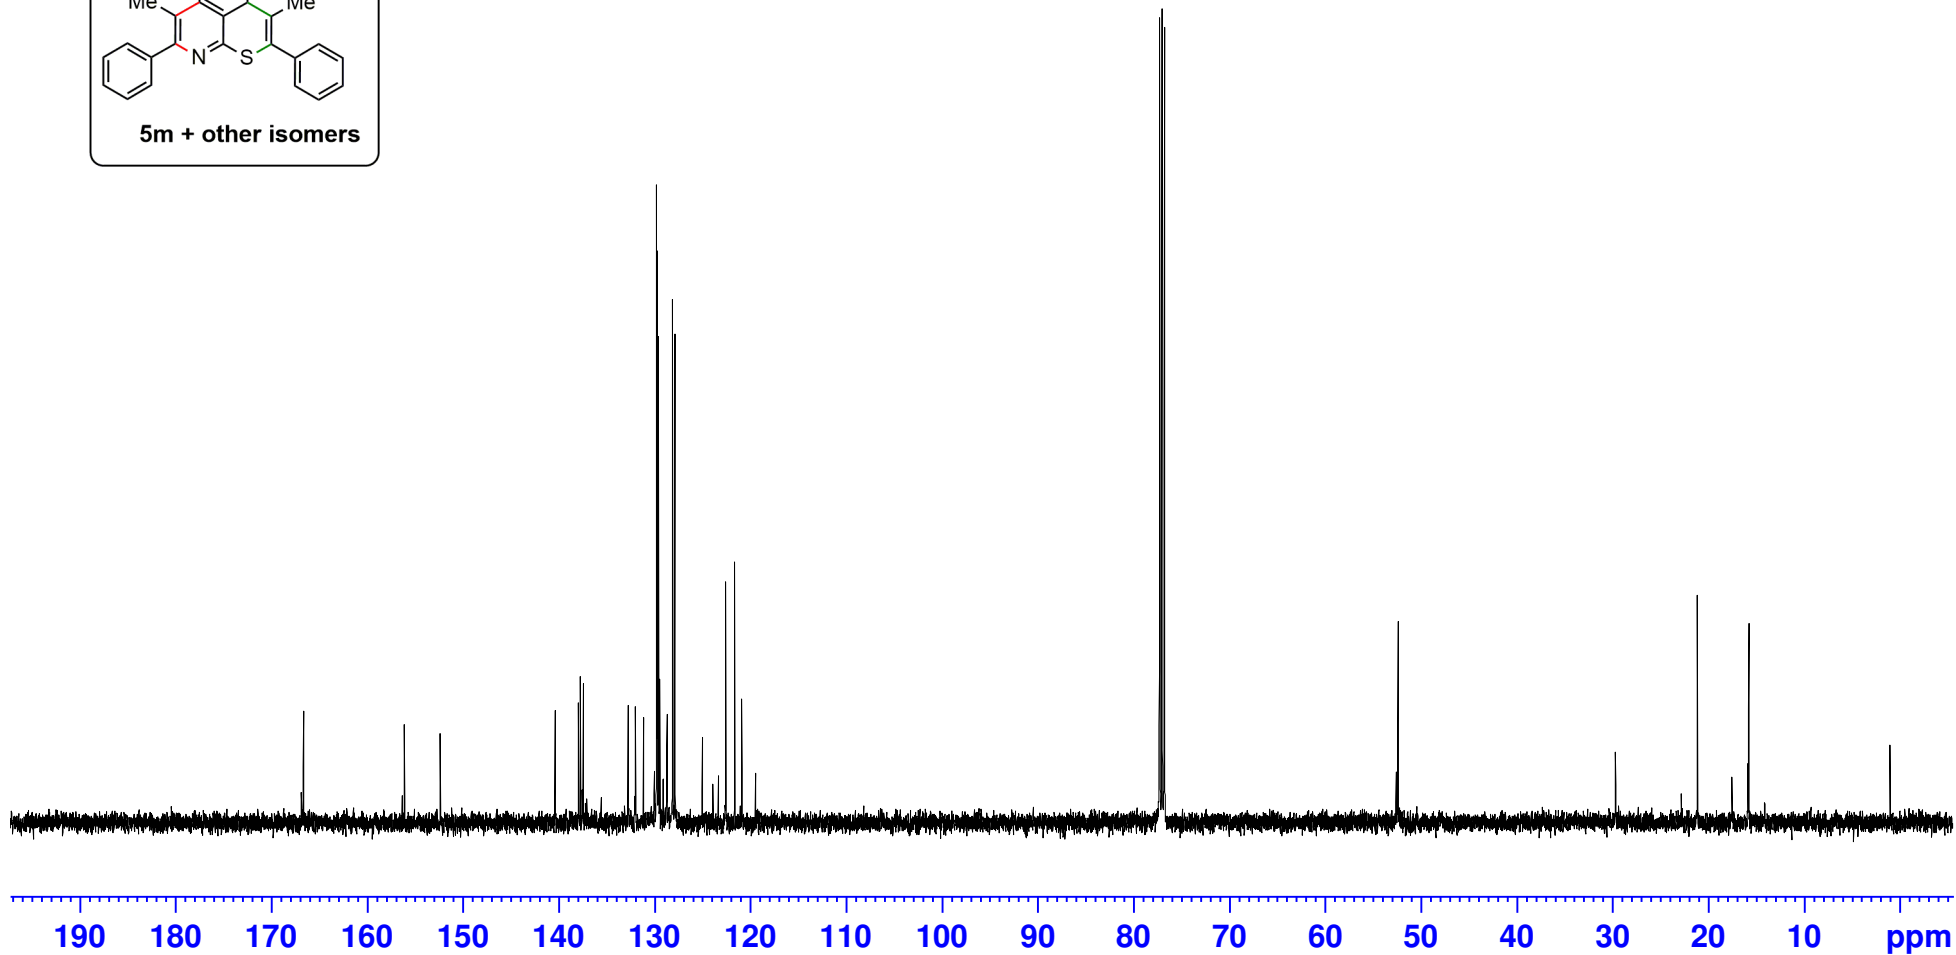

8.149  
8.135  
7.564  
7.560  
7.430  
7.415  
7.373  
7.360  
7.355  
7.346  
7.331  
7.290  
7.260  
7.241  
7.238  
7.190  
7.174  
7.160  
7.145  
7.139  
7.122  
7.104  
7.081  
7.070  
7.054  
7.040  
7.021  
7.000  
6.982  
6.962  
6.946  
6.929

SRS-4-244

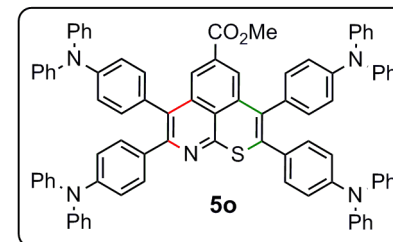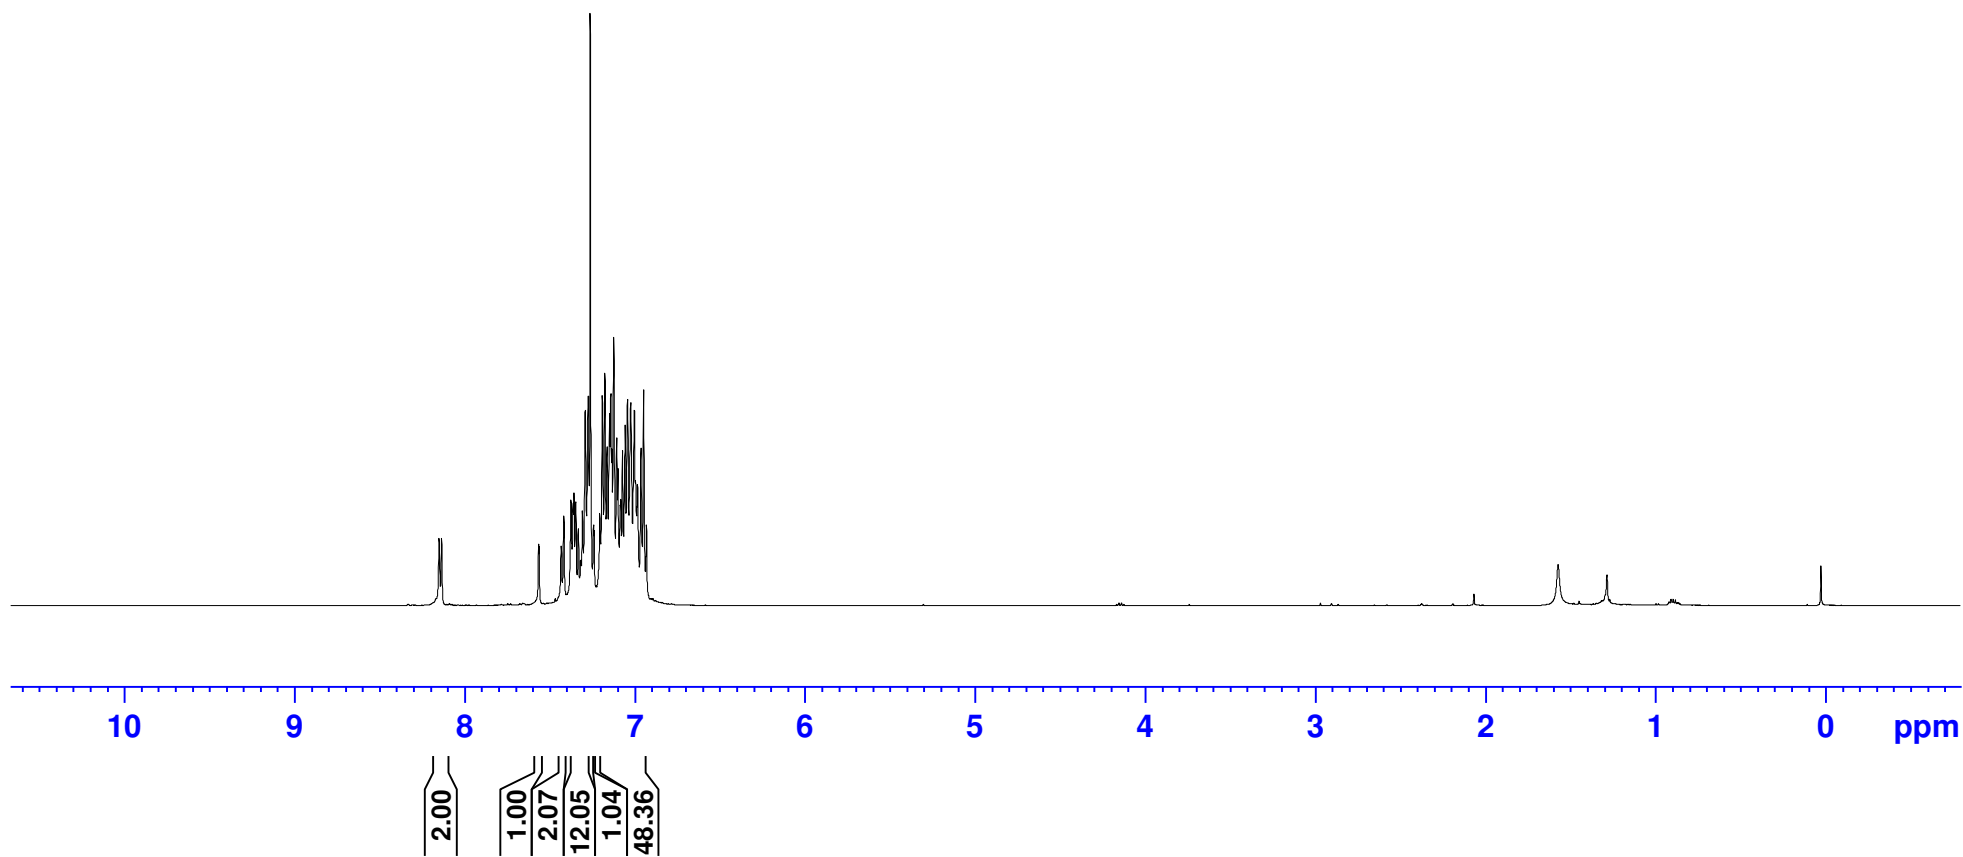

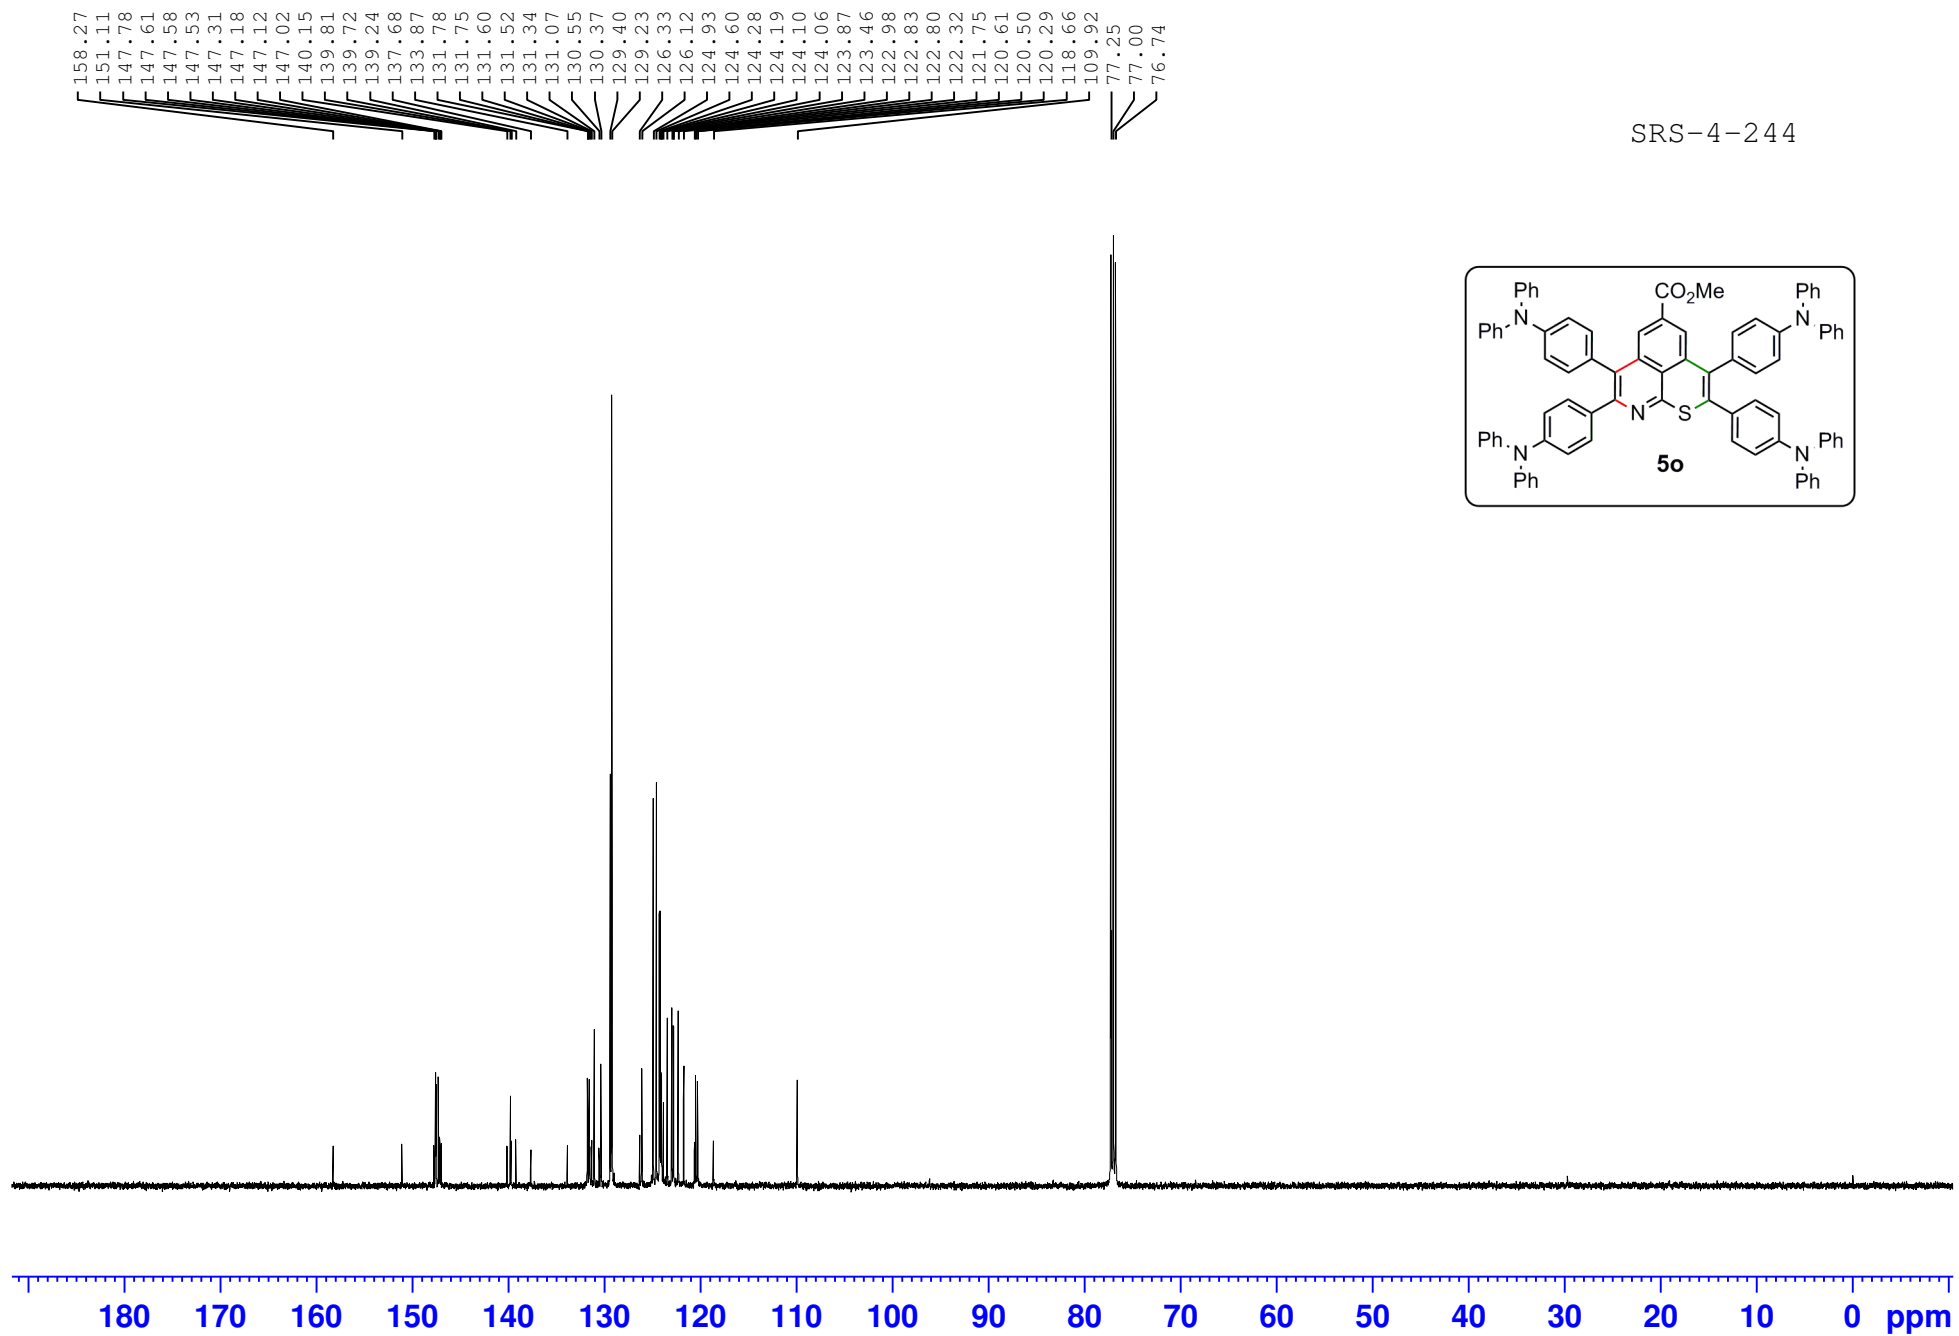

MJ-16-13

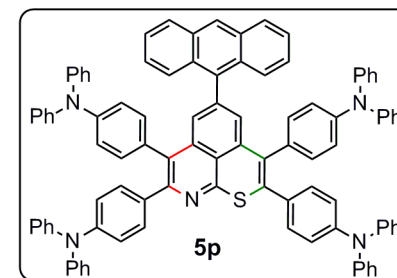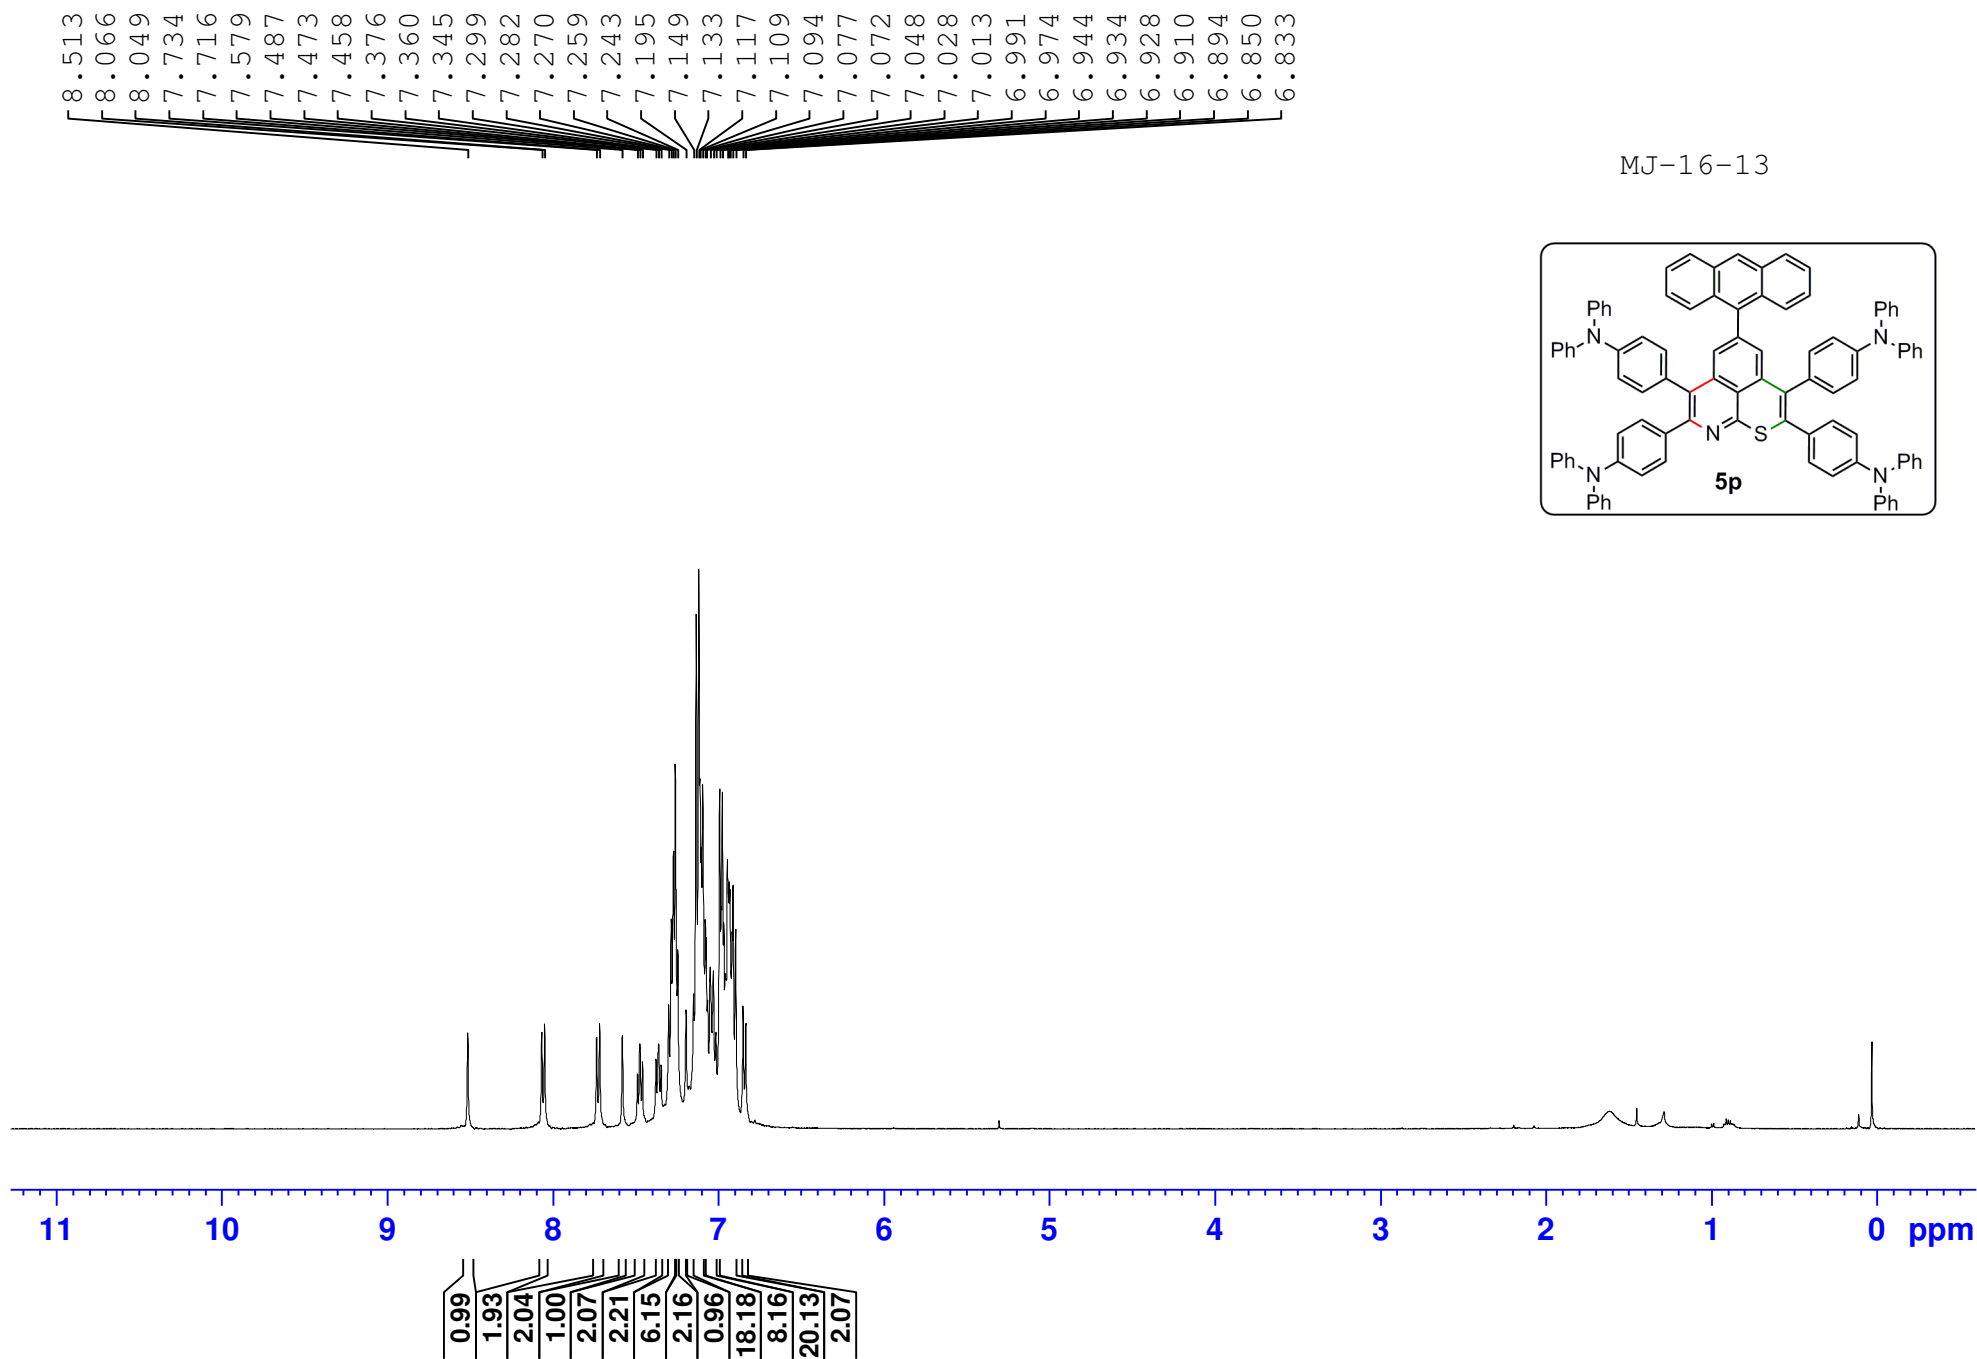

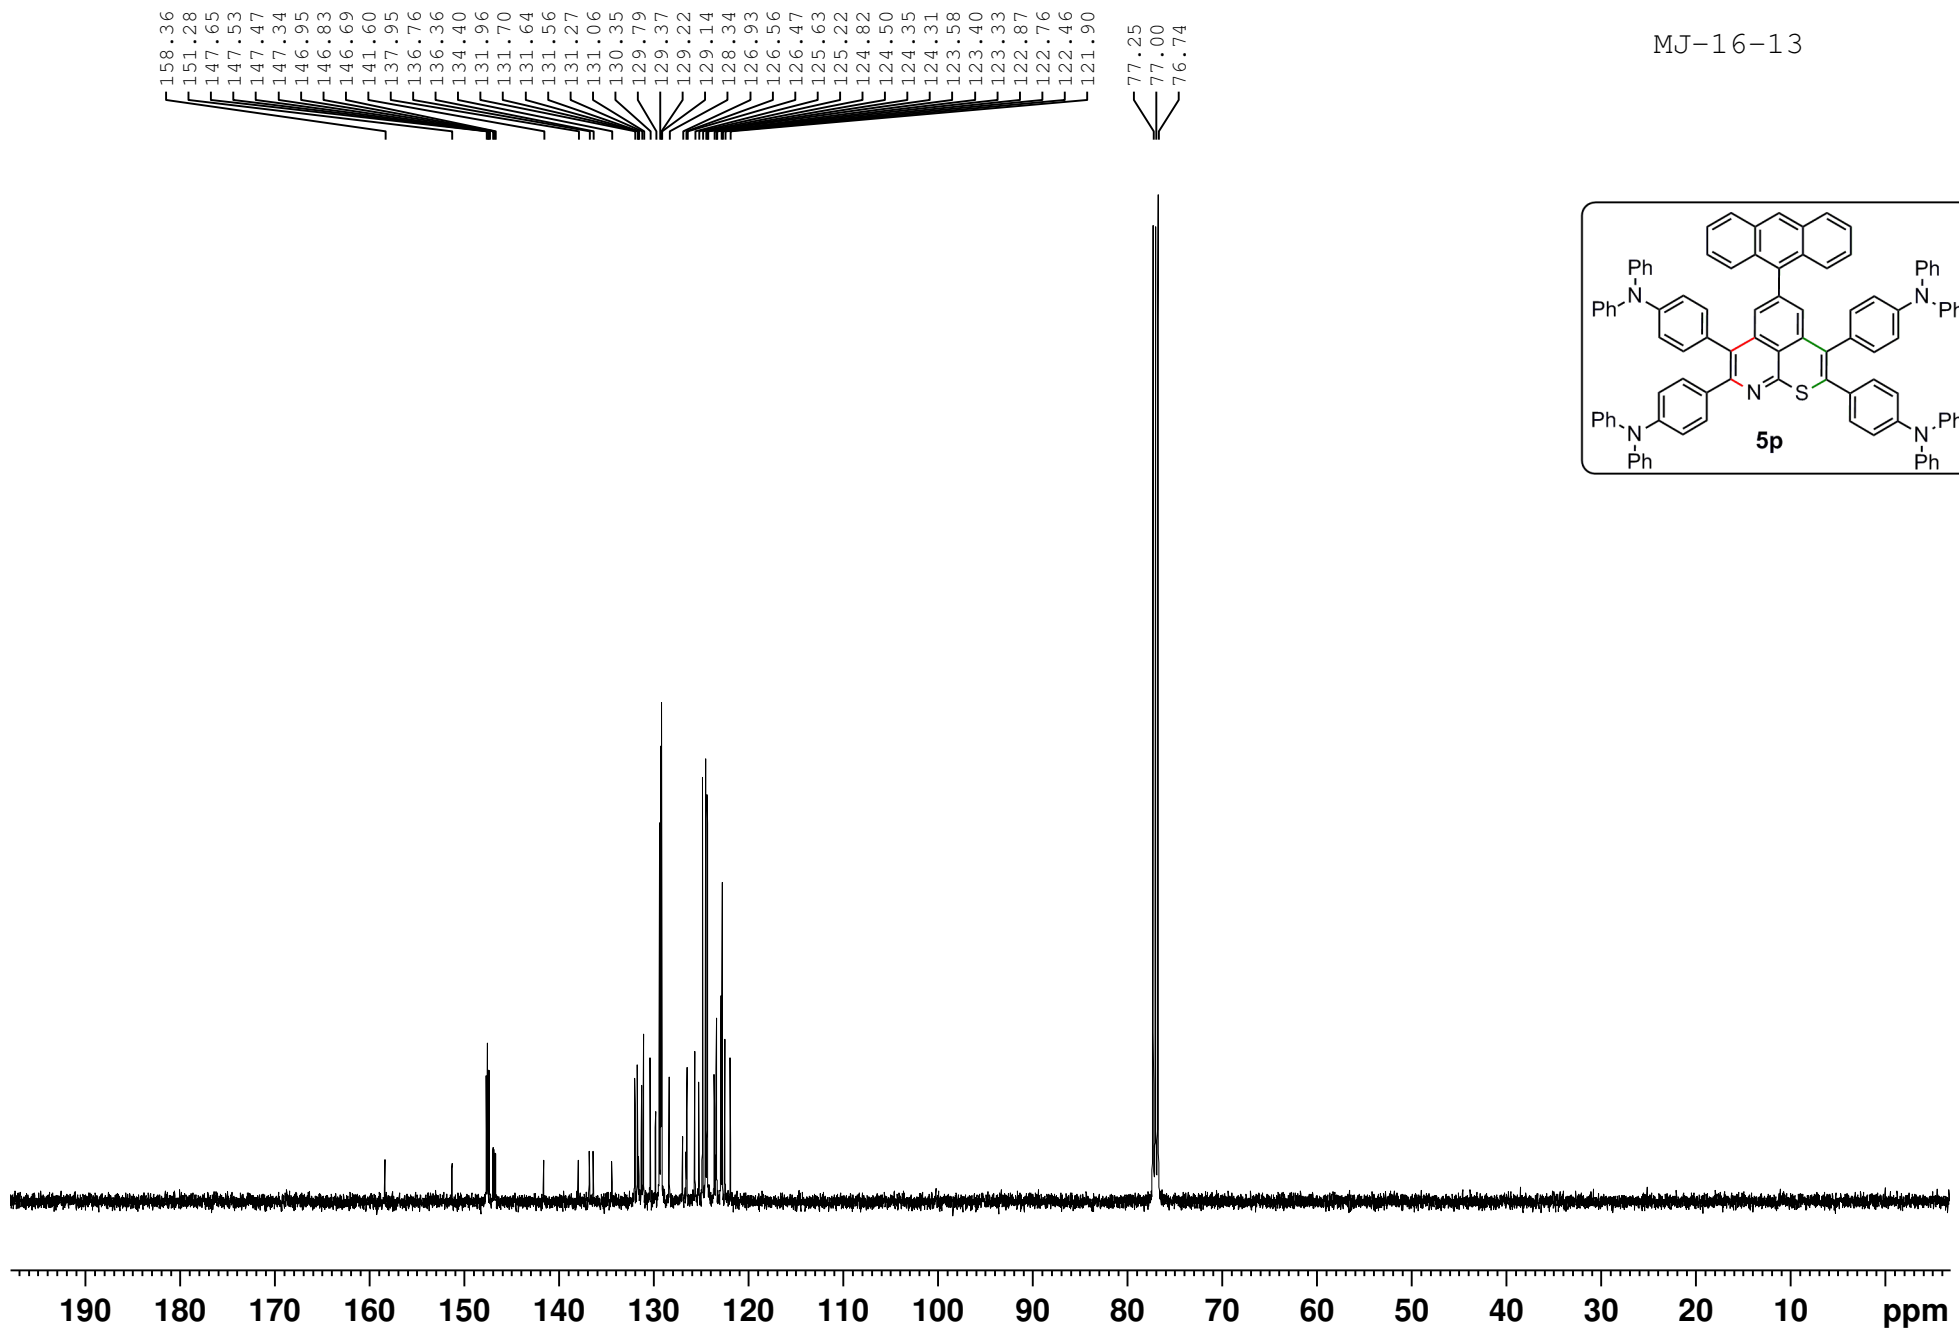

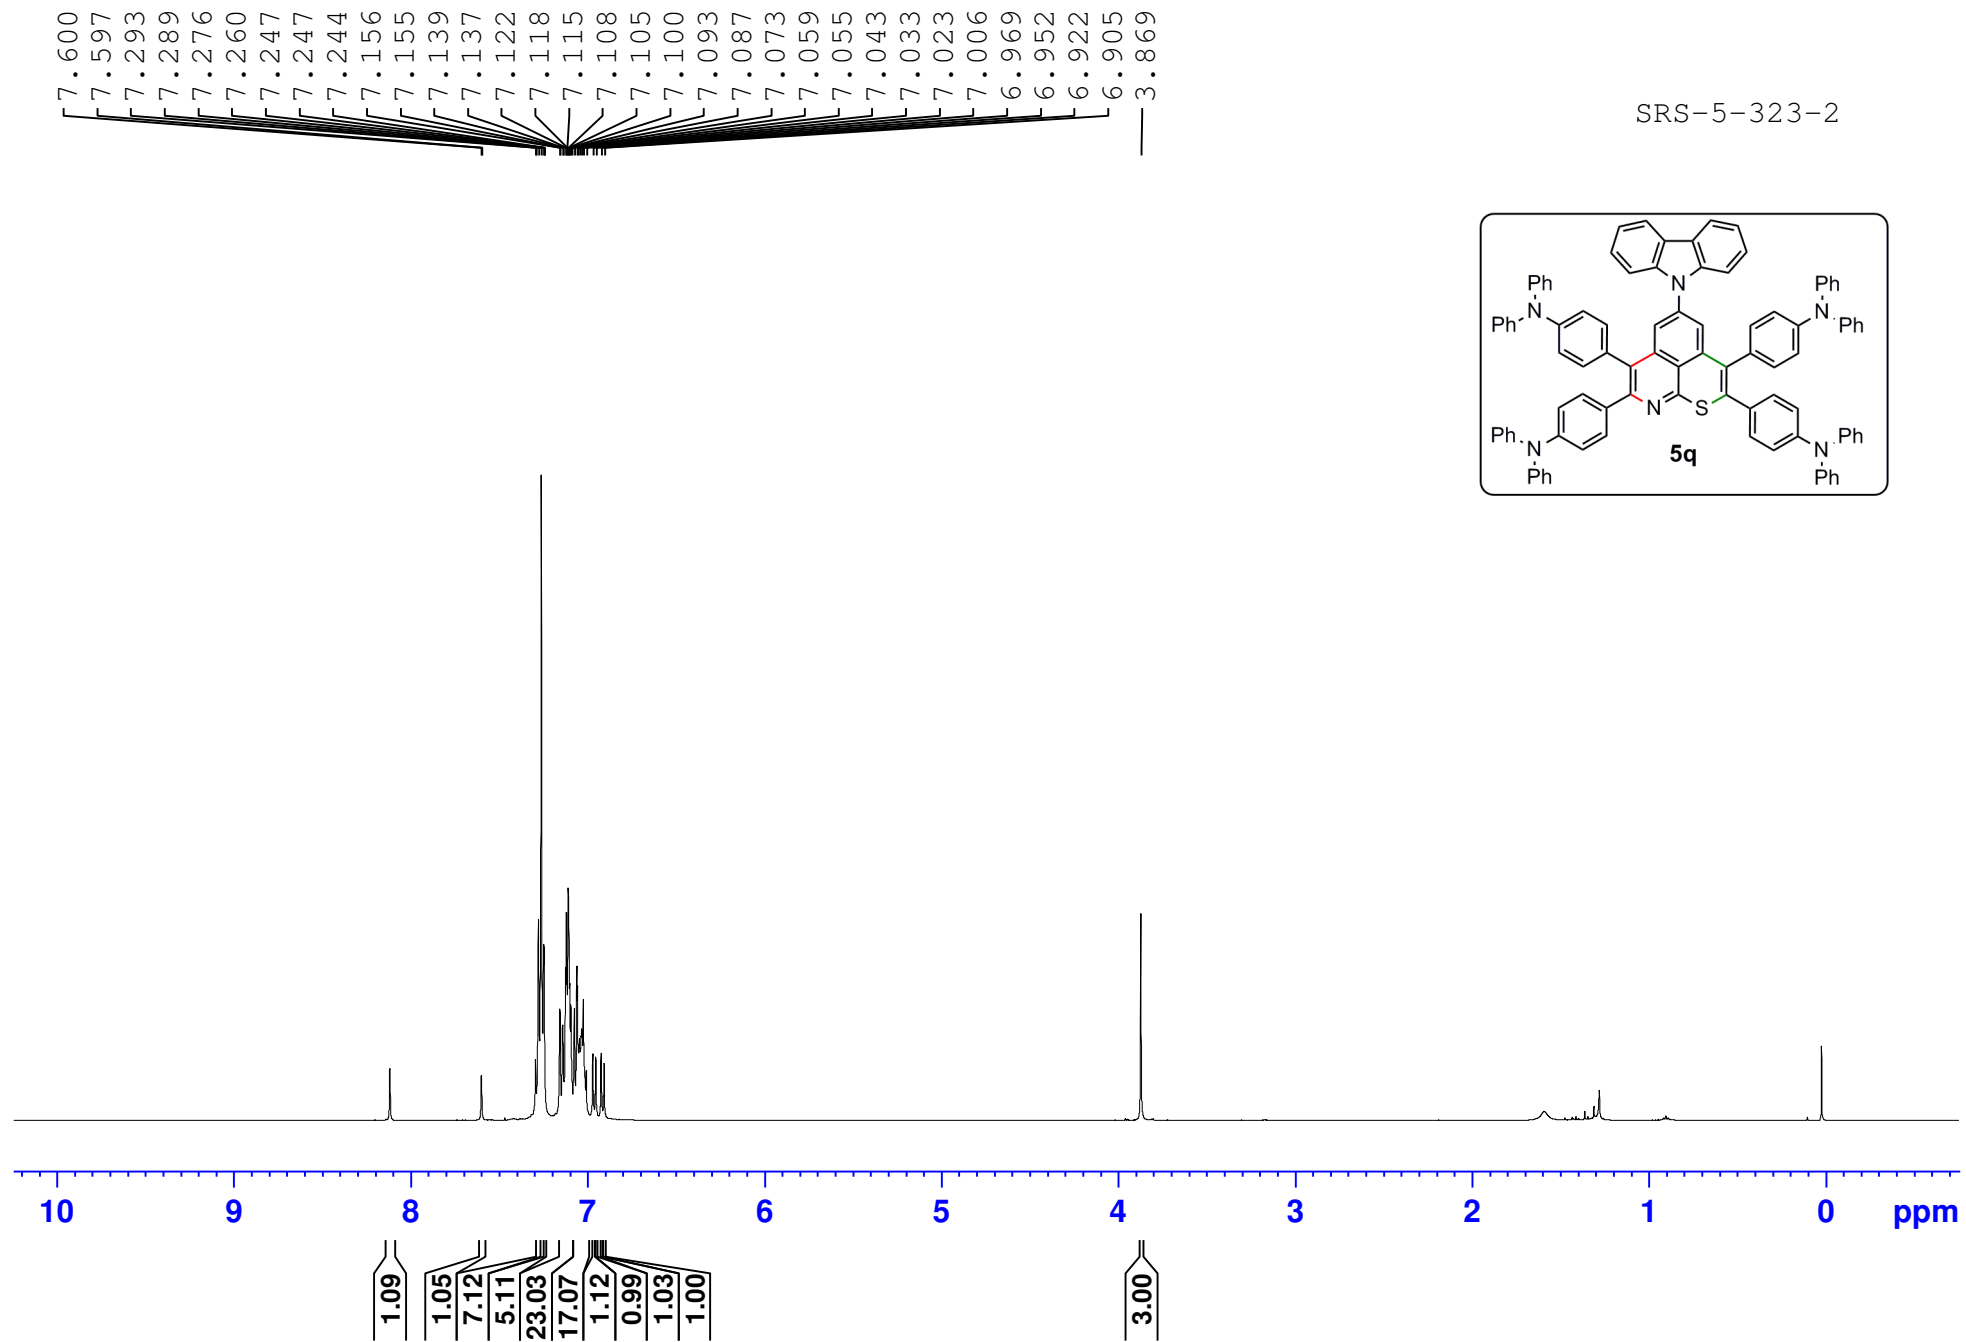

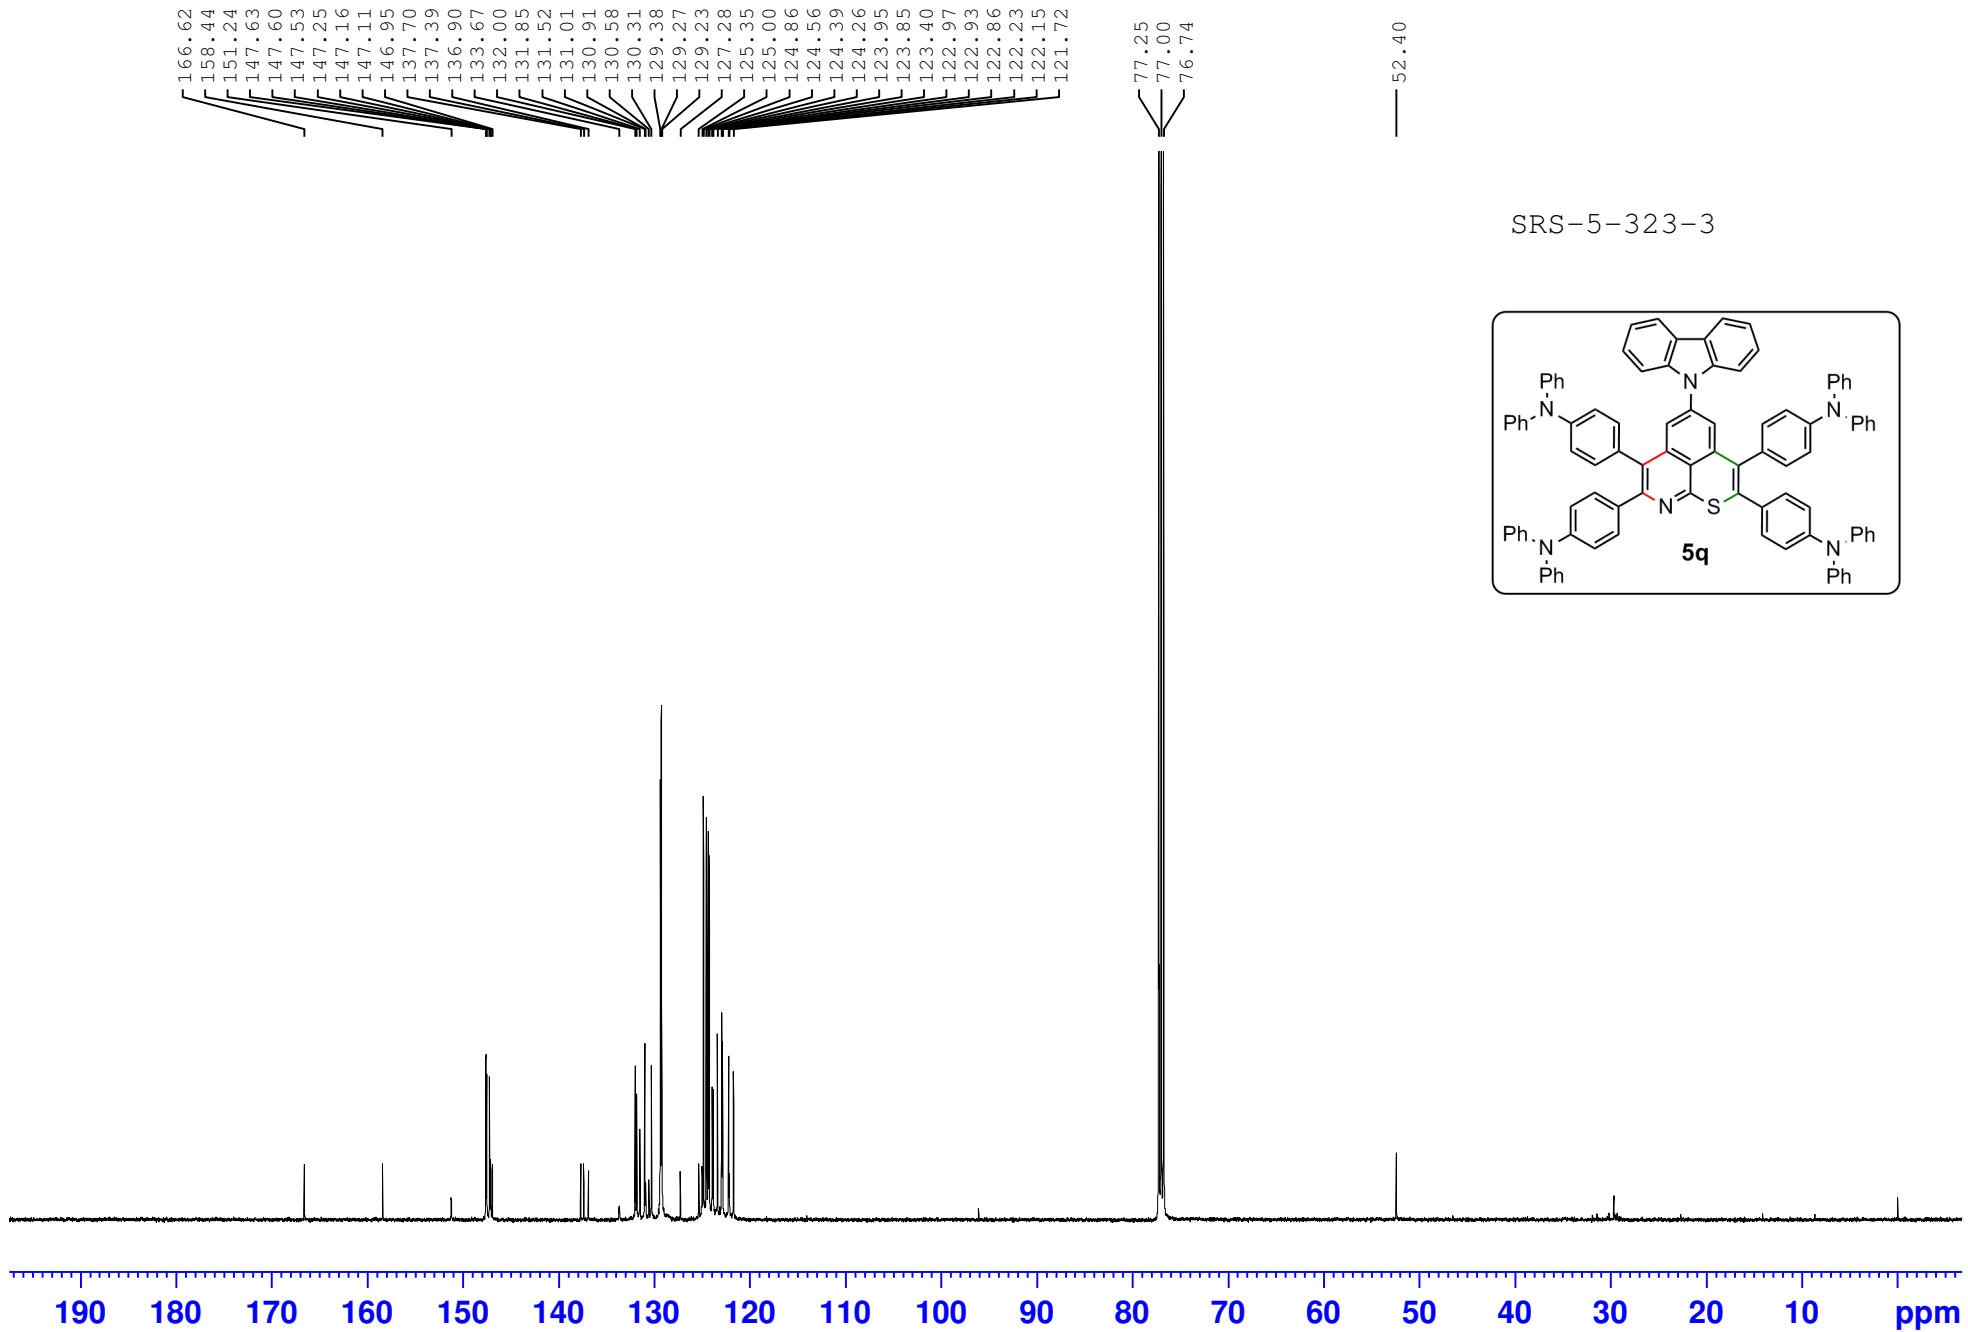

MJ-17-105 R

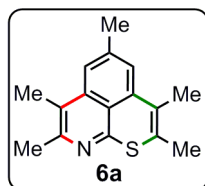

7.259  
7.177  
6.904

2.500  
2.430  
2.272  
2.157  
2.035

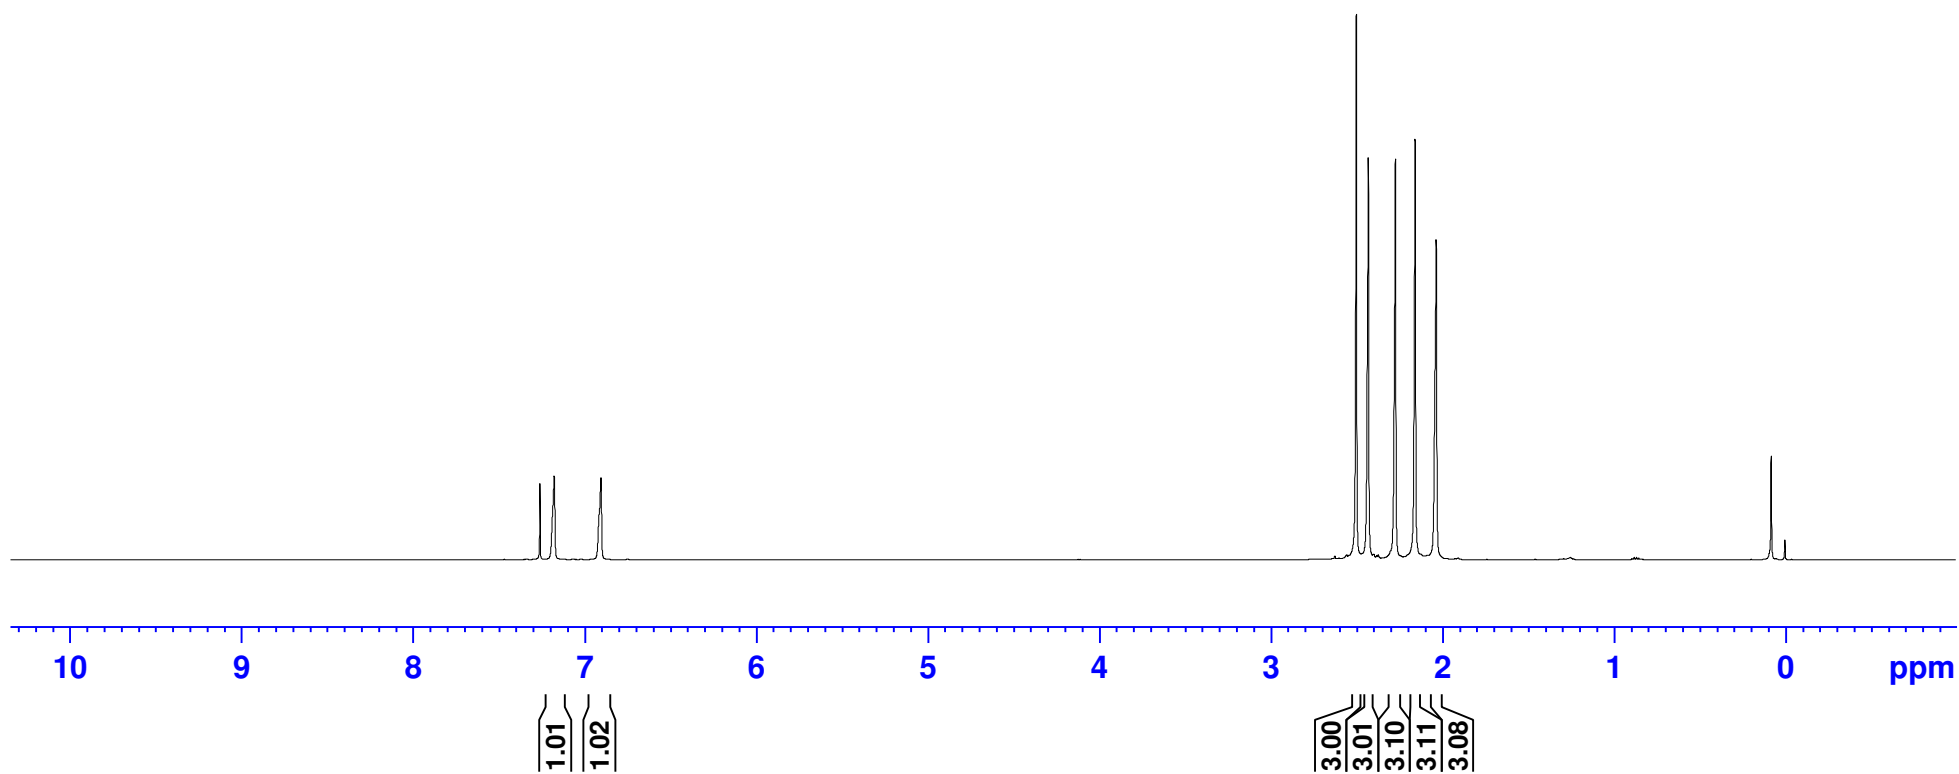



MJ-17-105 R

154.82  
148.53  
140.78  
137.35  
136.08  
128.47  
122.74  
121.57  
119.83  
118.93  
118.78

77.25  
77.00  
76.74

22.58  
22.40  
20.58  
15.40  
13.99

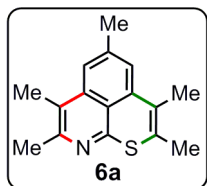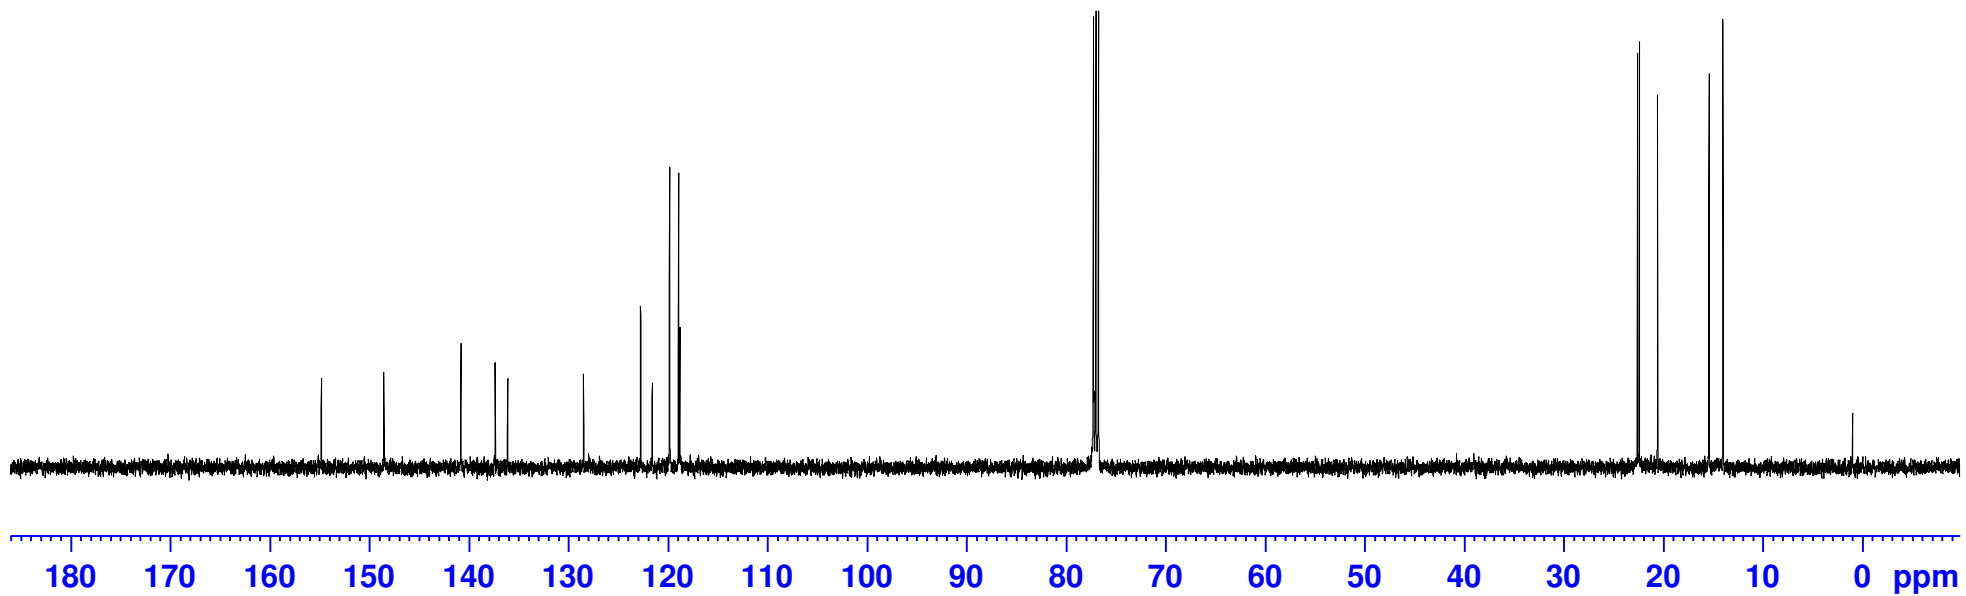

MAJJI-16-18

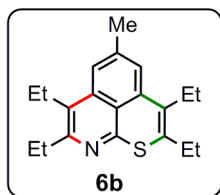

7.290  
7.260  
7.043

2.845  
2.830  
2.818  
2.815  
2.804  
2.789  
2.774  
2.663  
2.648  
2.633  
2.618  
2.521  
2.505  
2.490  
2.475  
1.289  
1.274  
1.269  
1.259  
1.254  
1.239  
1.219  
1.204  
1.188  
1.171  
1.156

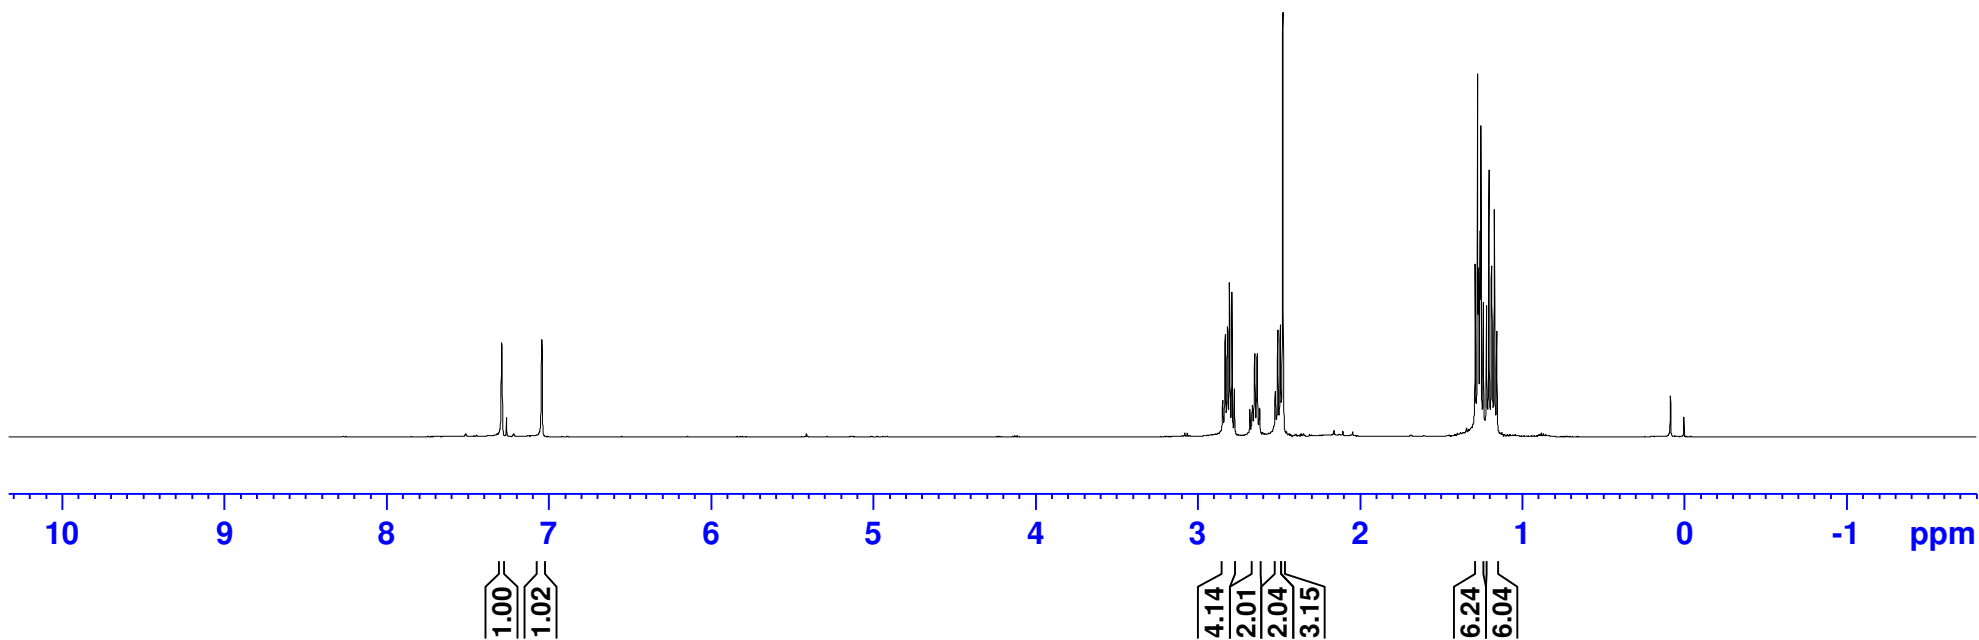

MAJJI-16-18

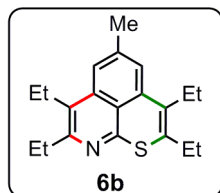

155.48  
153.56

140.70  
137.16  
135.64  
135.33

128.03  
124.22  
122.53  
120.18  
119.10

77.25  
77.00  
76.74

28.03  
27.39  
22.71  
21.62  
20.70  
14.44  
14.29  
13.87  
12.82

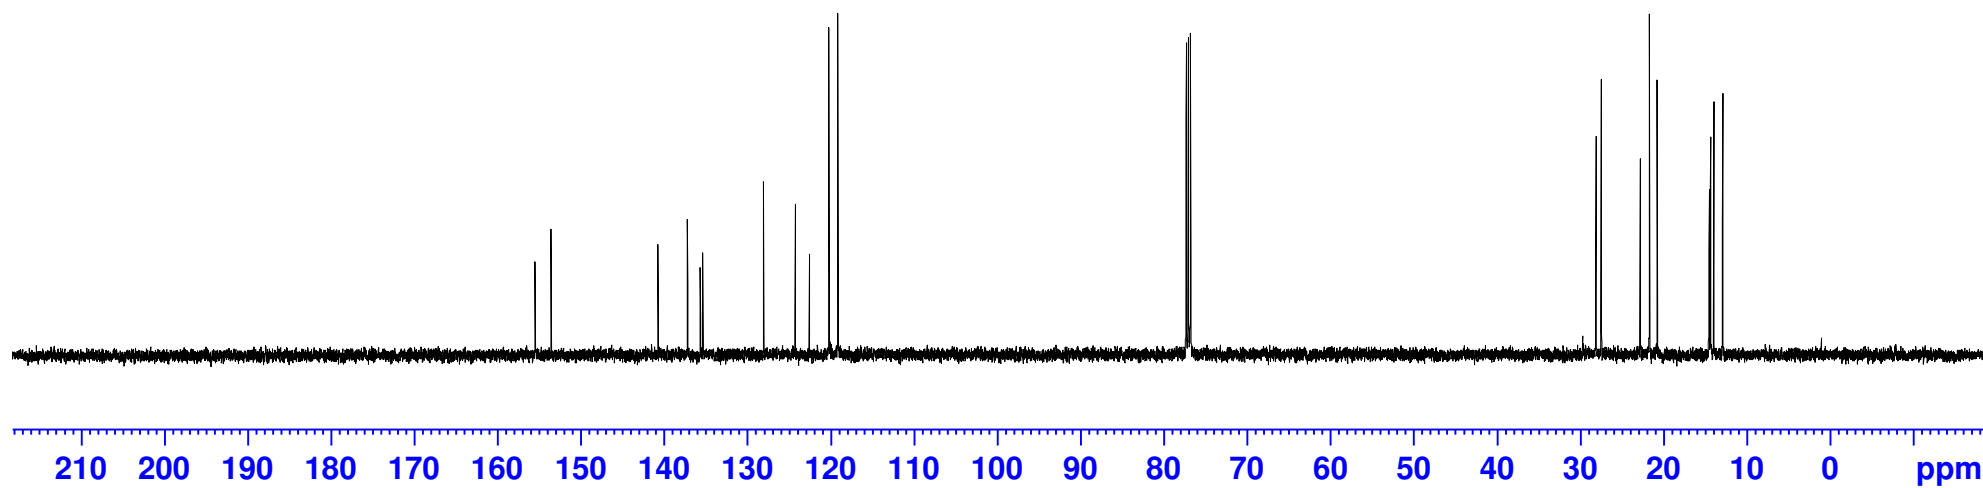

MAJJI-16-19

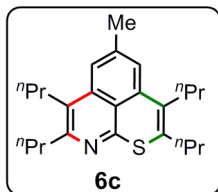

— 7.253  
— 6.994

2.764  
2.748  
2.732  
2.717  
2.576  
2.561  
2.544  
2.463  
2.448  
2.432  
1.740  
1.724  
1.709  
1.696  
1.682  
1.666  
1.651  
1.608  
1.593  
1.578  
1.564  
1.549  
1.534  
1.071  
1.063  
1.057  
1.048  
1.032  
1.017  
1.000  
0.985

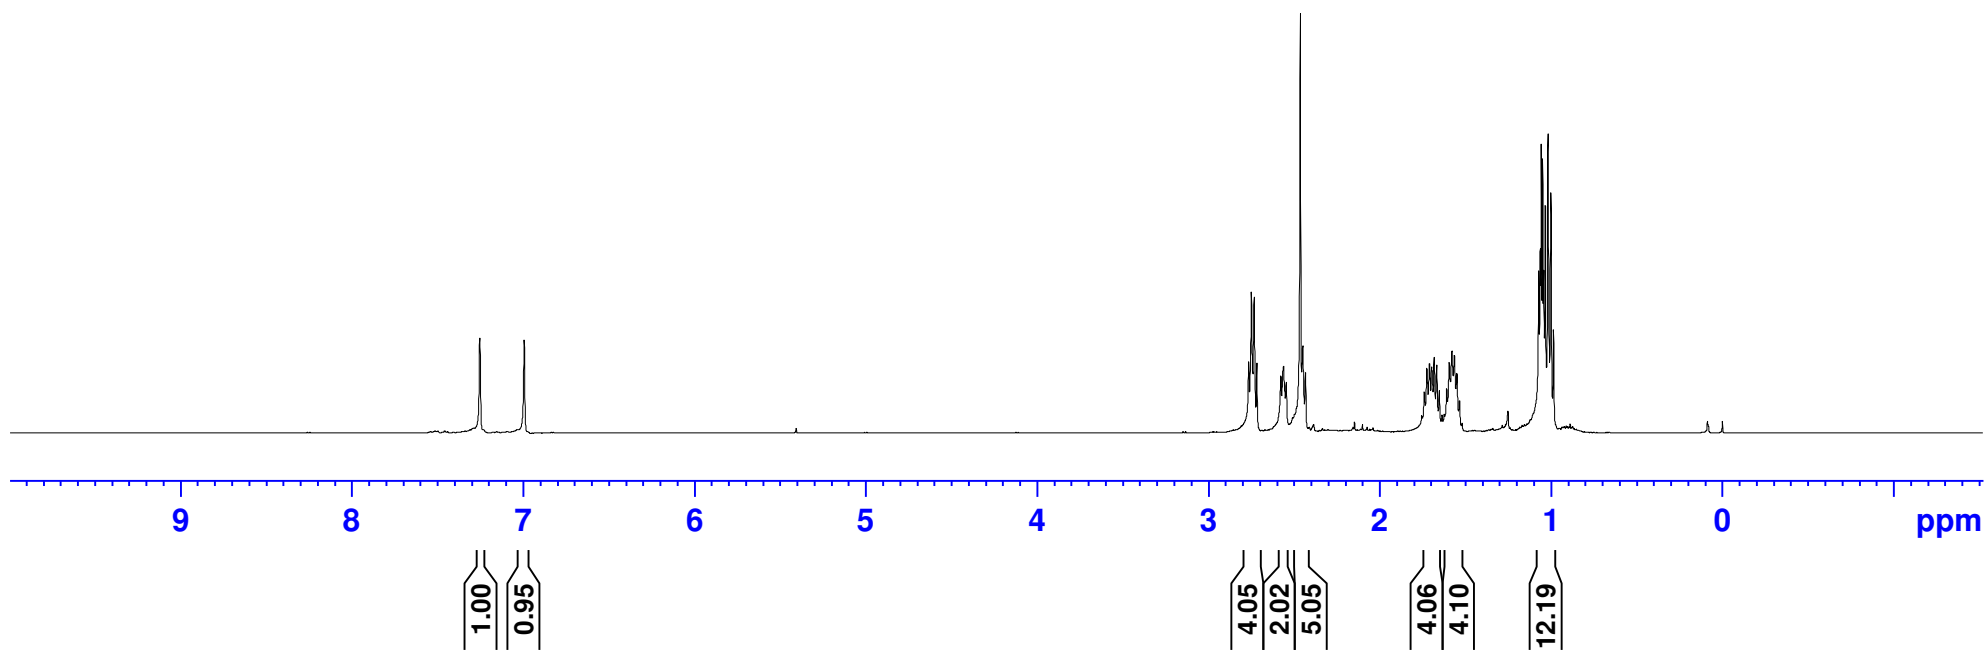

MAJJI-16-19

155.39  
152.63

140.53  
137.36  
135.58  
134.61

127.12  
123.17  
122.38  
120.31  
119.30

77.25  
77.00  
76.74

36.95  
36.13  
30.86  
29.83  
23.30  
22.95  
22.75  
22.69  
21.30  
14.43  
14.26  
14.21  
13.91

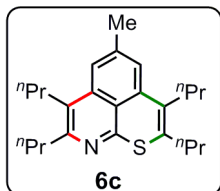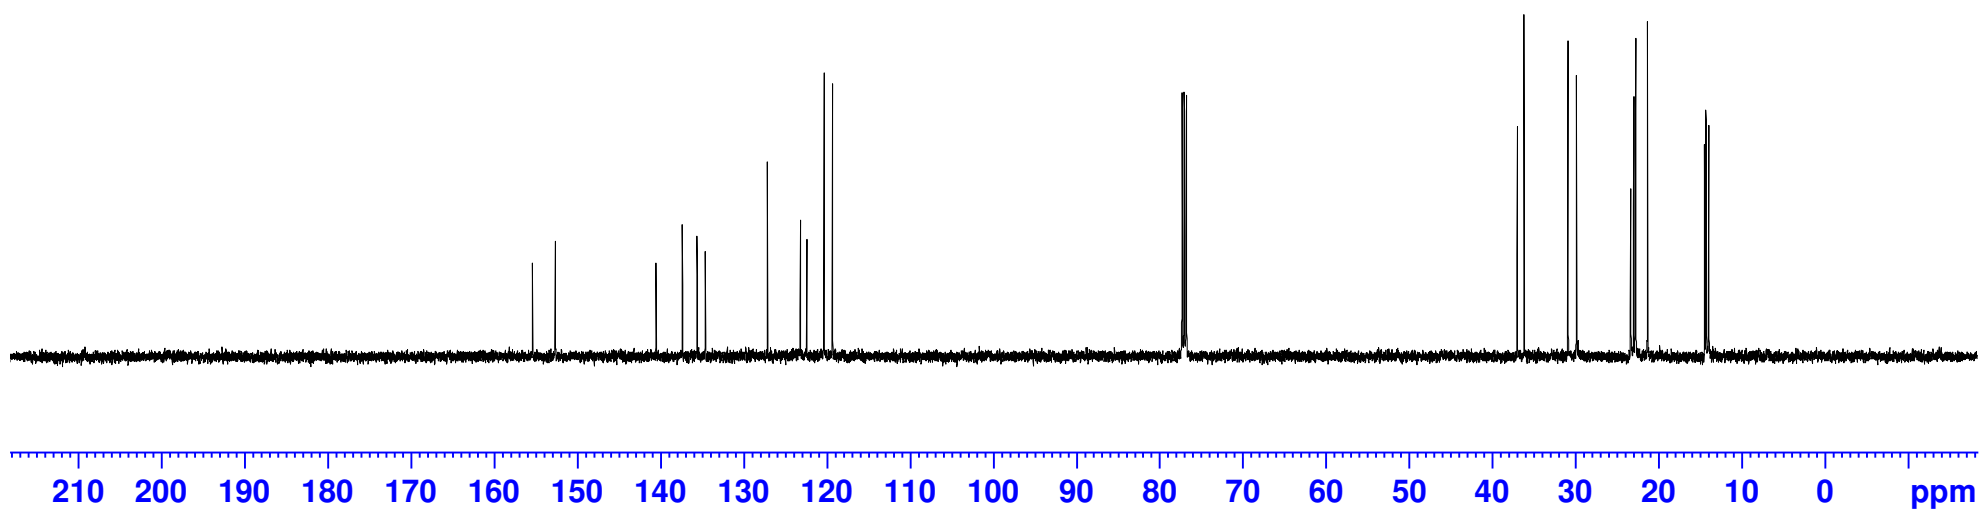

MAJJI-16-20

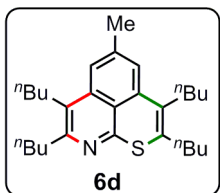

— 7.281  
— 7.030

2.804  
2.792  
2.775  
2.773  
2.760  
2.620  
2.606  
2.589  
2.501  
2.492  
2.469  
1.724  
1.709  
1.693  
1.673  
1.655  
1.640  
1.625  
1.580  
1.554  
1.542  
1.531  
1.518  
1.505  
1.491  
1.480  
1.476  
1.465  
1.461  
1.451  
1.446  
1.436  
1.432  
1.031  
1.016  
1.002  
0.991  
0.977  
0.962

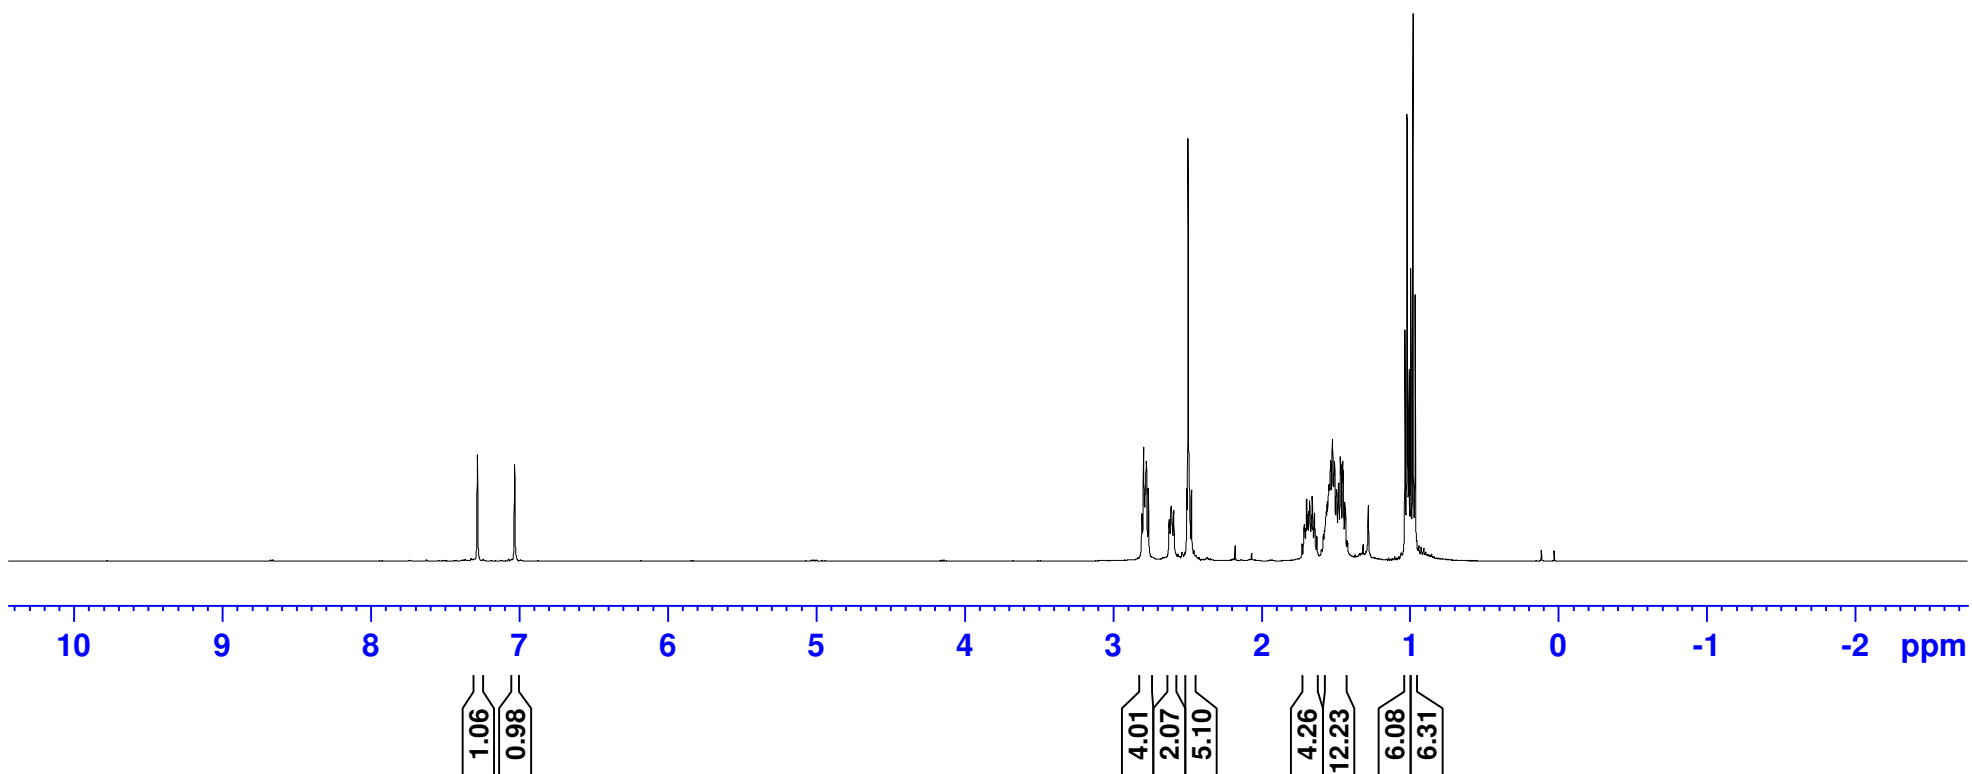

MAJJI-16-20

155.35  
152.75

140.52  
137.36  
135.62  
134.67

127.10  
123.20  
122.39  
120.25  
119.22

77.25  
77.00  
76.74

34.72  
33.84  
32.30  
31.81  
31.60  
30.15  
28.47  
27.44  
23.08  
22.95  
22.92  
22.76  
22.51  
14.00  
13.92  
13.88  
13.81

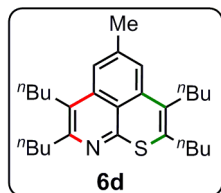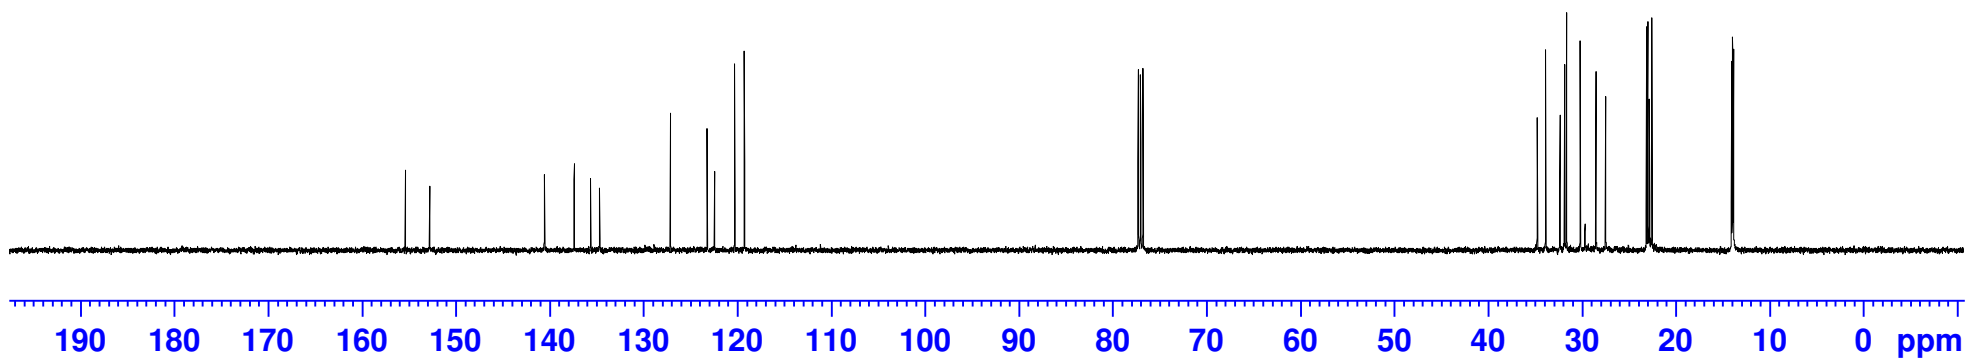

AG-6-143

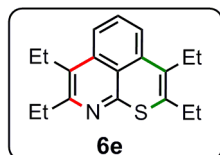

7.555  
7.534  
7.523  
7.518  
7.502  
7.260  
7.247  
7.241  
7.231  
7.225

2.871  
2.852  
2.832  
2.812  
2.793  
2.681  
2.662  
2.643  
2.624  
2.539  
2.520  
2.501  
2.483  
1.300  
1.281  
1.277  
1.262  
1.258  
1.251  
1.239  
1.224  
1.205  
1.187  
1.169  
1.150

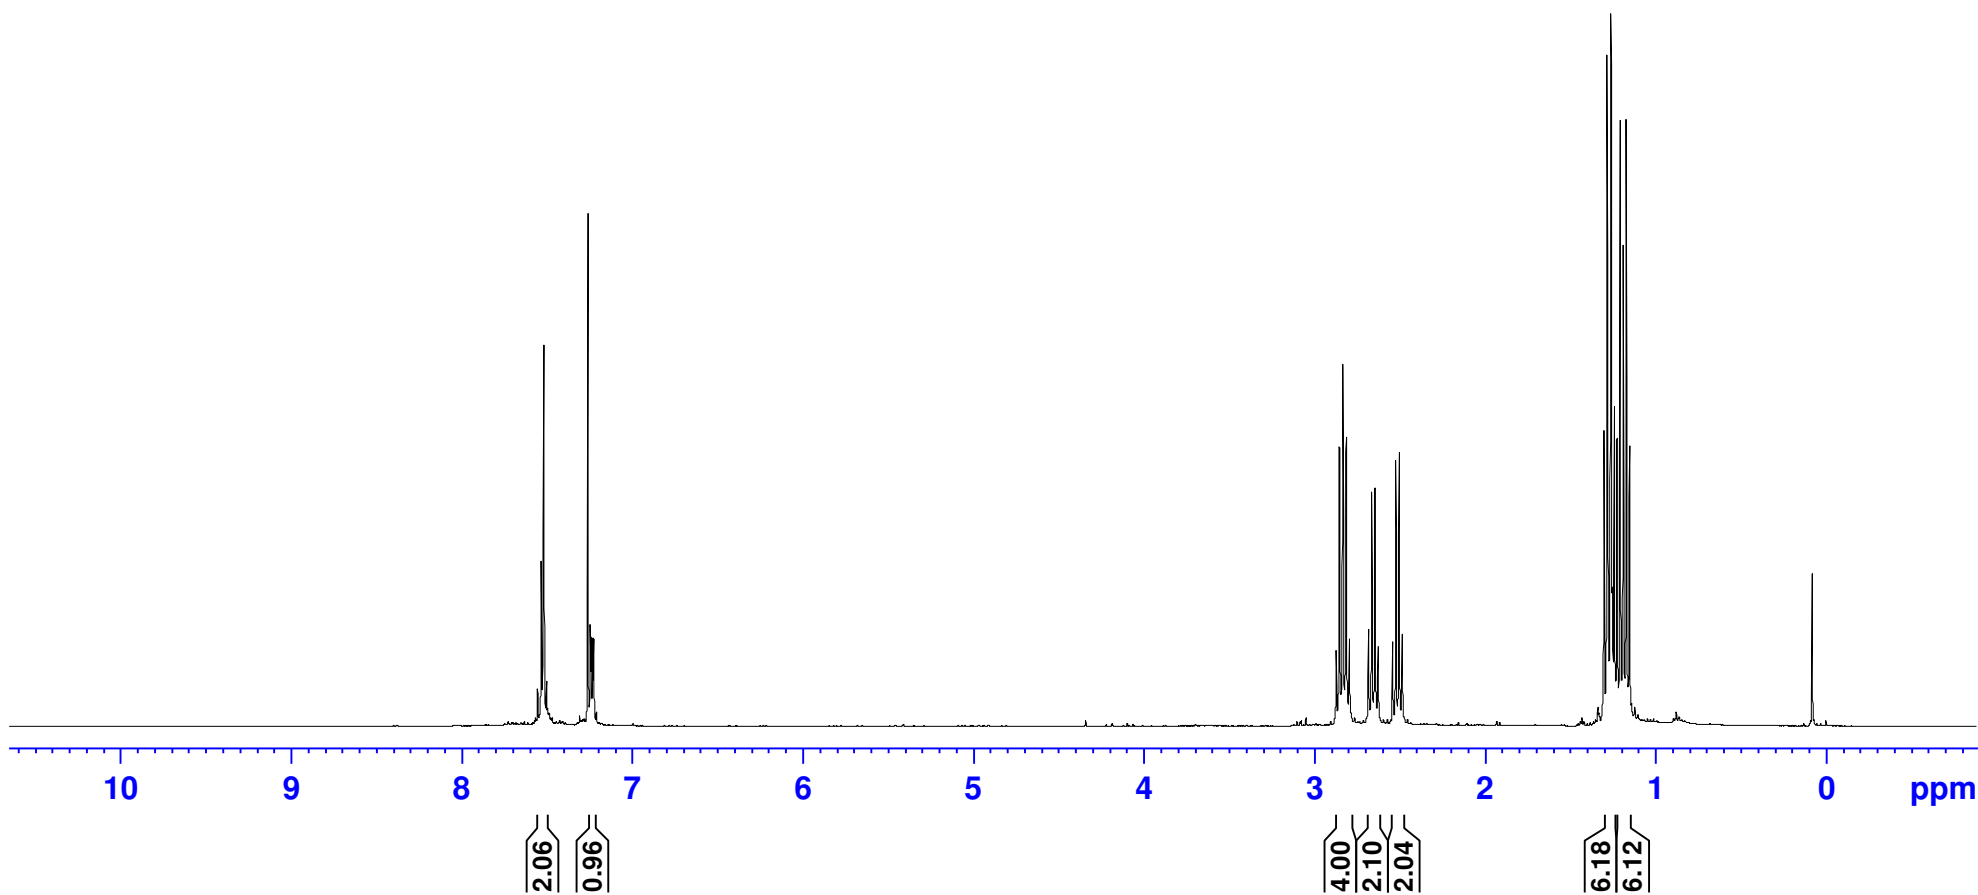



AG-6-143

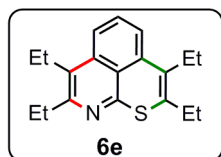

155.84  
153.15

136.92  
135.53  
131.04  
128.31  
124.84  
124.08  
119.66  
118.39

77.32  
77.00  
76.68

27.85  
27.41  
21.70  
20.74  
14.47  
14.31  
13.85  
12.77

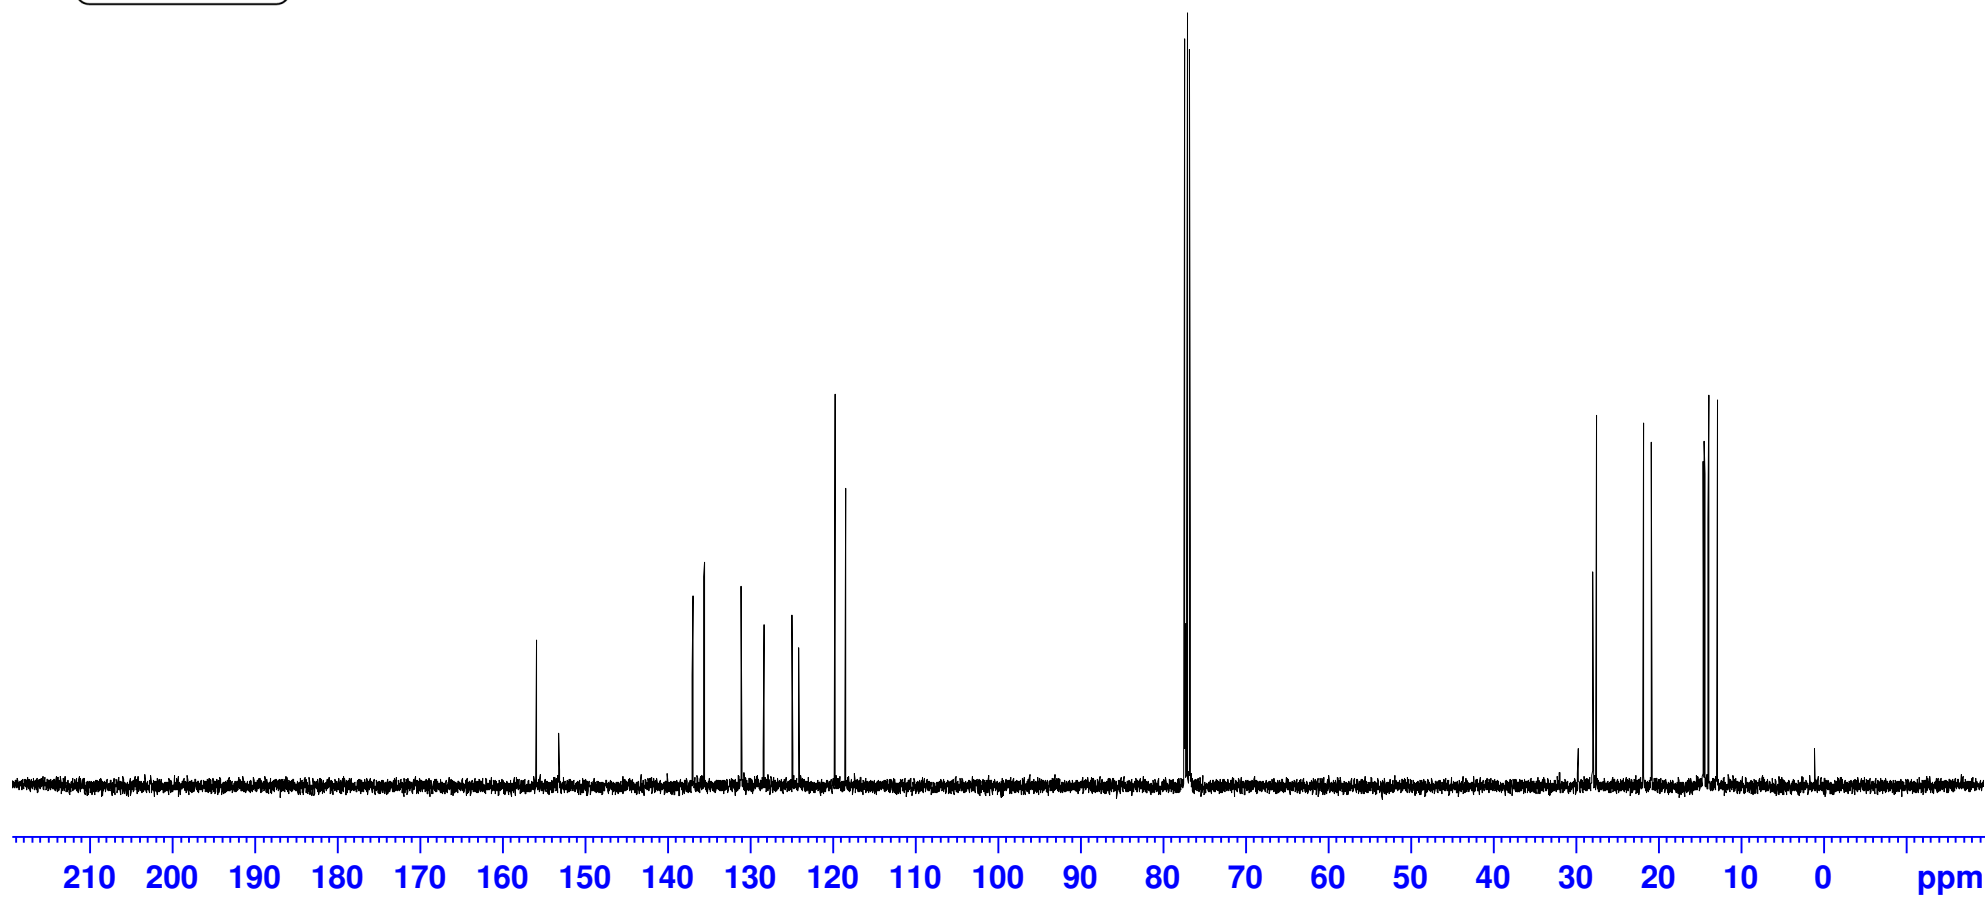

AS-404

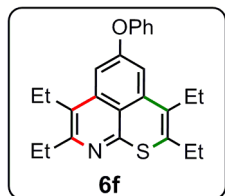

7.410  
7.392  
7.389  
7.370  
7.260  
7.188  
7.169  
7.150  
7.100  
7.081  
6.953  
6.939

2.812  
2.793  
2.774  
2.755  
2.714  
2.695  
2.676  
2.658  
2.599  
2.581  
2.562  
2.548  
2.543  
2.529  
2.510  
2.491  
1.282  
1.263  
1.244  
1.129  
1.118  
1.110  
1.099  
1.092  
1.081

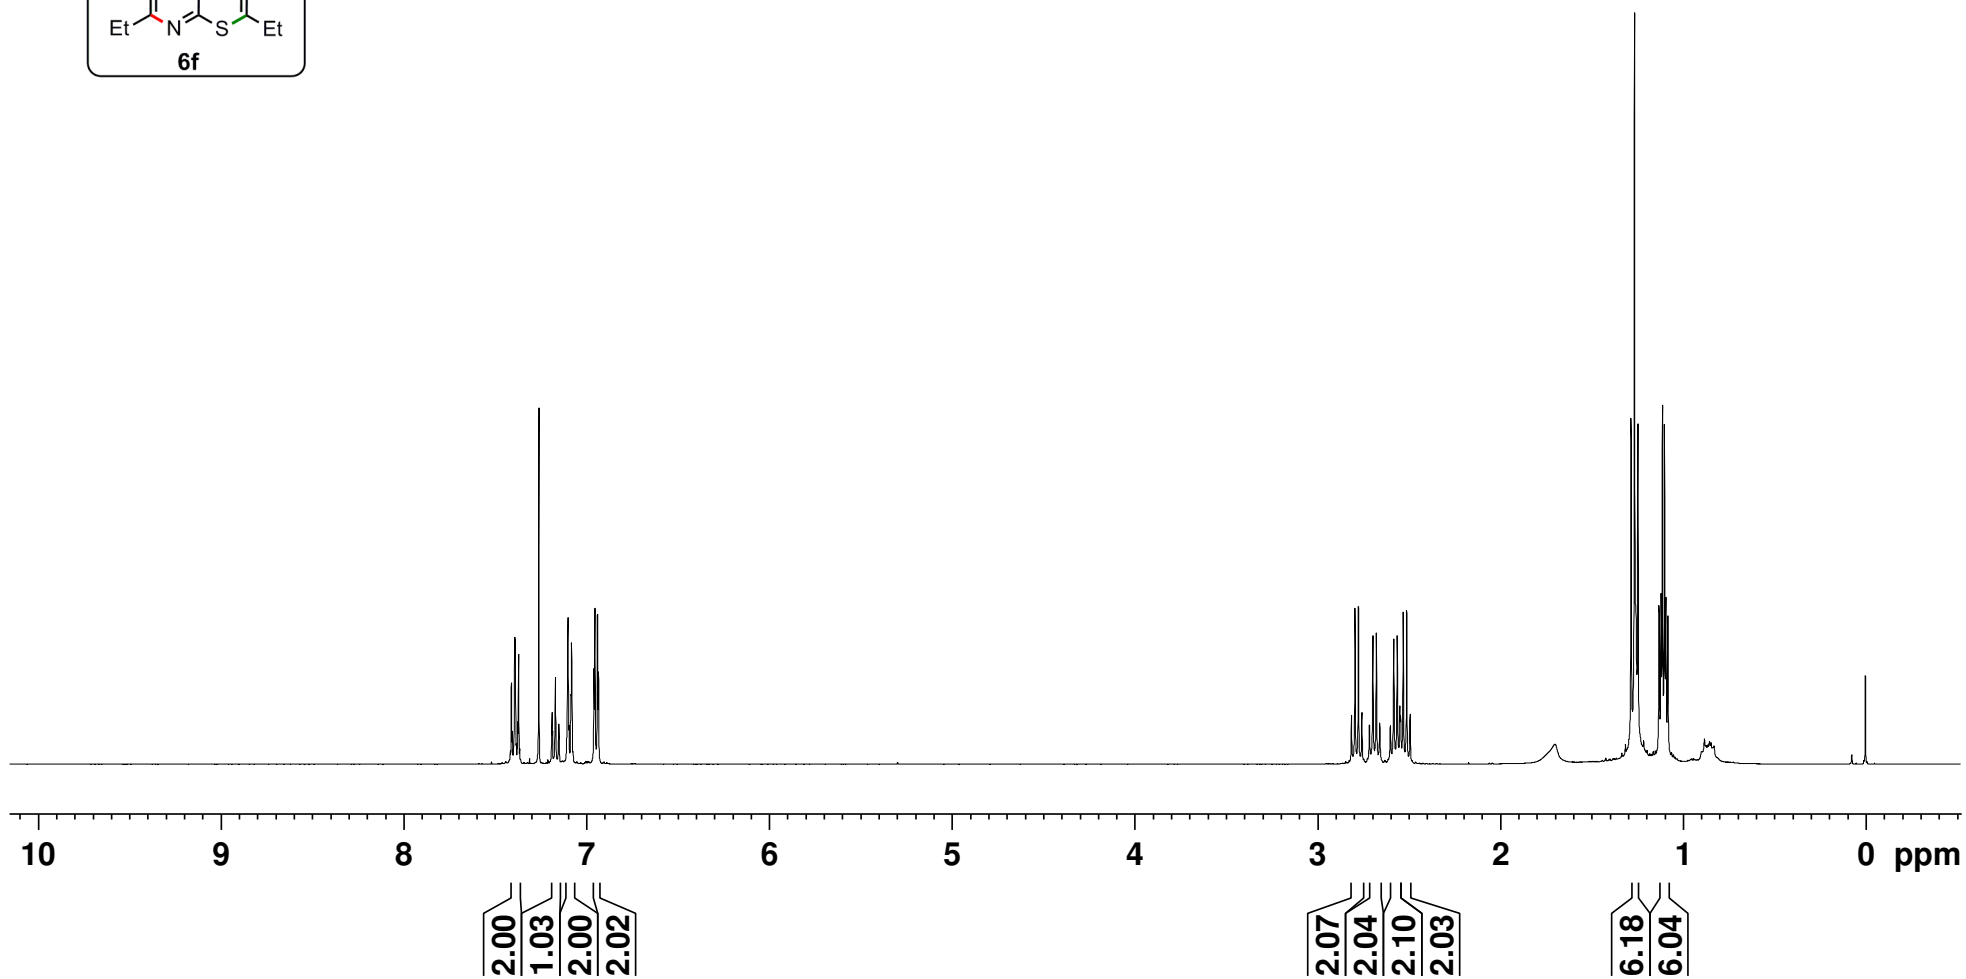

AS-404

159.41  
156.31  
155.41  
154.22  
138.95  
138.28  
137.21  
129.86  
128.01  
124.45  
123.84  
121.07  
119.27  
111.14  
106.42

77.32  
77.00  
76.68

28.15  
27.50  
21.78  
20.89  
14.44  
14.37  
13.58  
12.62

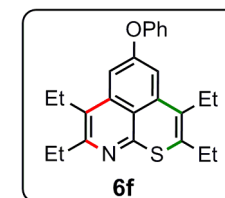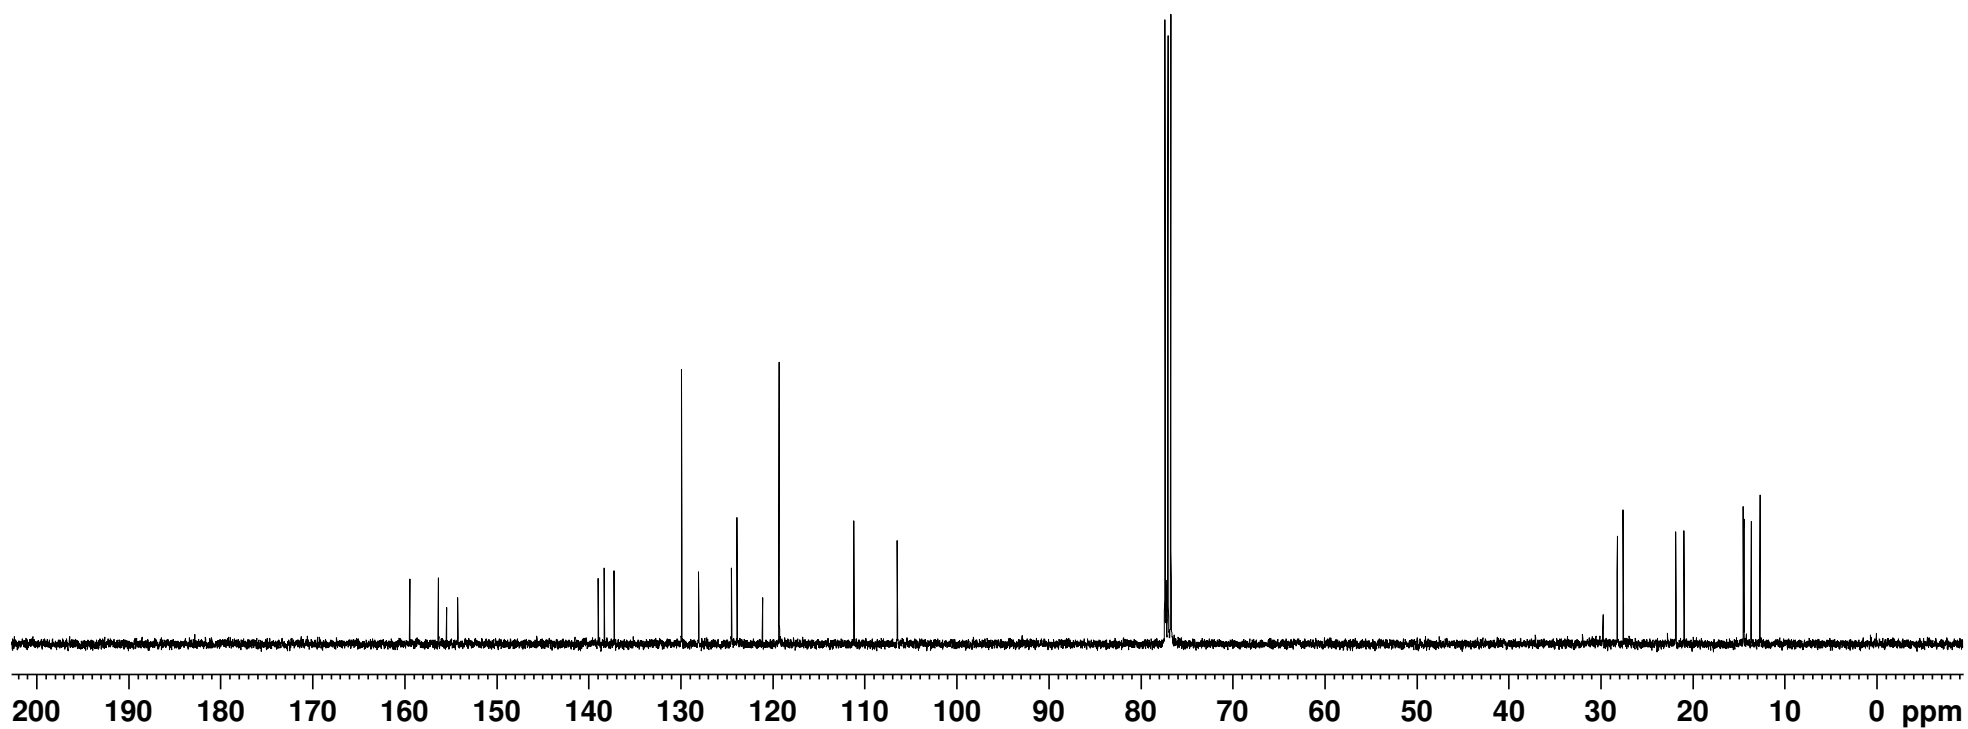

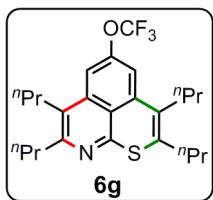

**AS- 566**

7.280  
7.263  
6.984

2.794  
2.778  
2.762  
2.745  
2.591  
2.575  
2.559  
2.526  
2.511  
2.495  
1.771  
1.755  
1.740  
1.718  
1.703  
1.687  
1.624  
1.609  
1.593  
1.583  
1.567  
1.552  
1.092  
1.077  
1.070  
1.062  
1.055

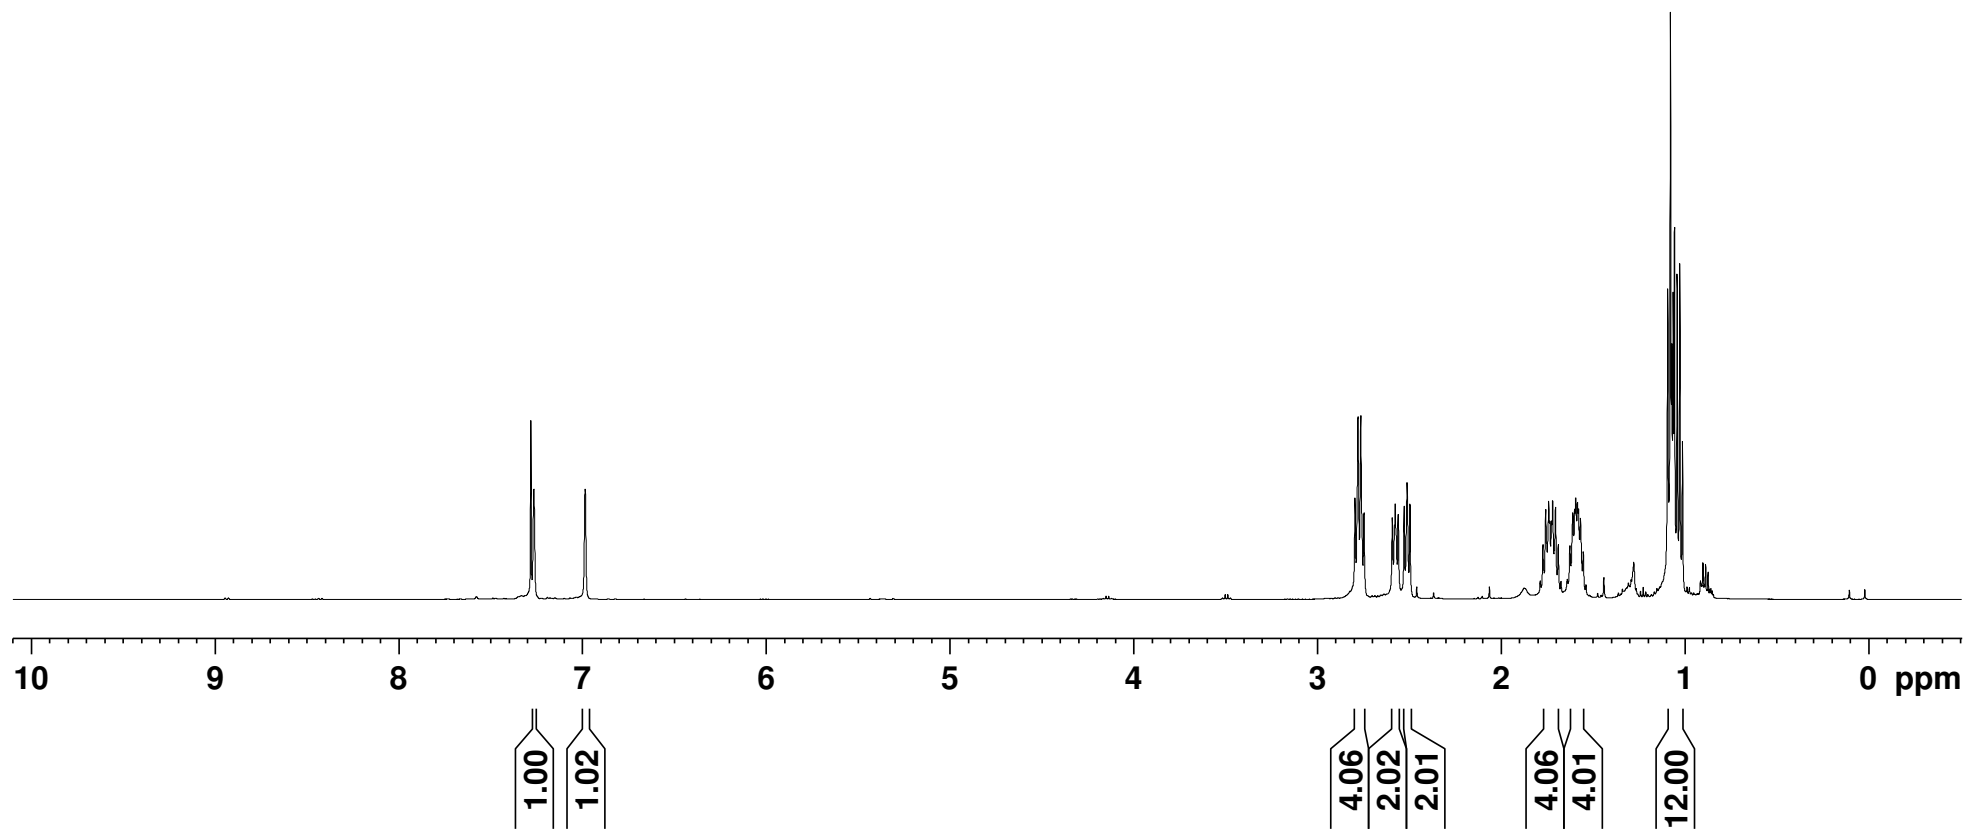

AS- 566

155.64  
153.99  
151.20  
138.92  
138.65  
137.37  
126.91  
123.90  
123.63  
122.35  
121.58  
119.53  
117.50  
111.49  
109.88

77.25  
77.00  
76.75

37.01  
36.25  
30.99  
29.95  
23.21  
23.05  
22.57  
21.04  
14.32  
14.20  
14.18  
13.92

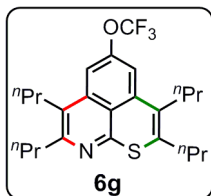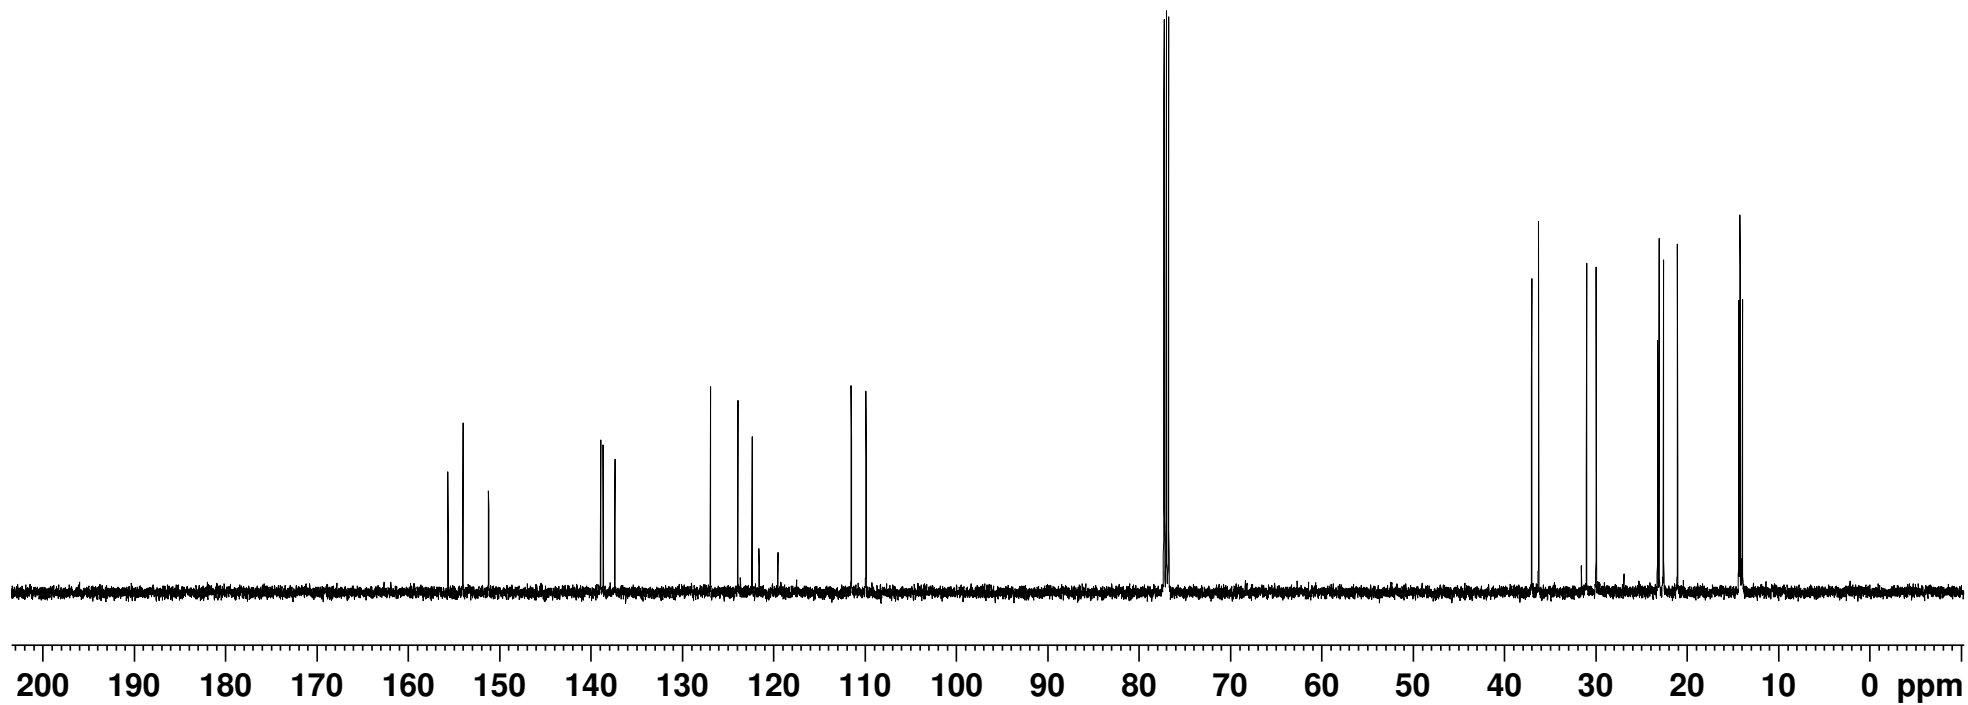

AS-566

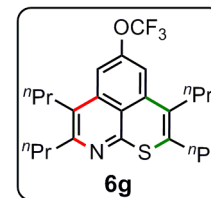

-57.26

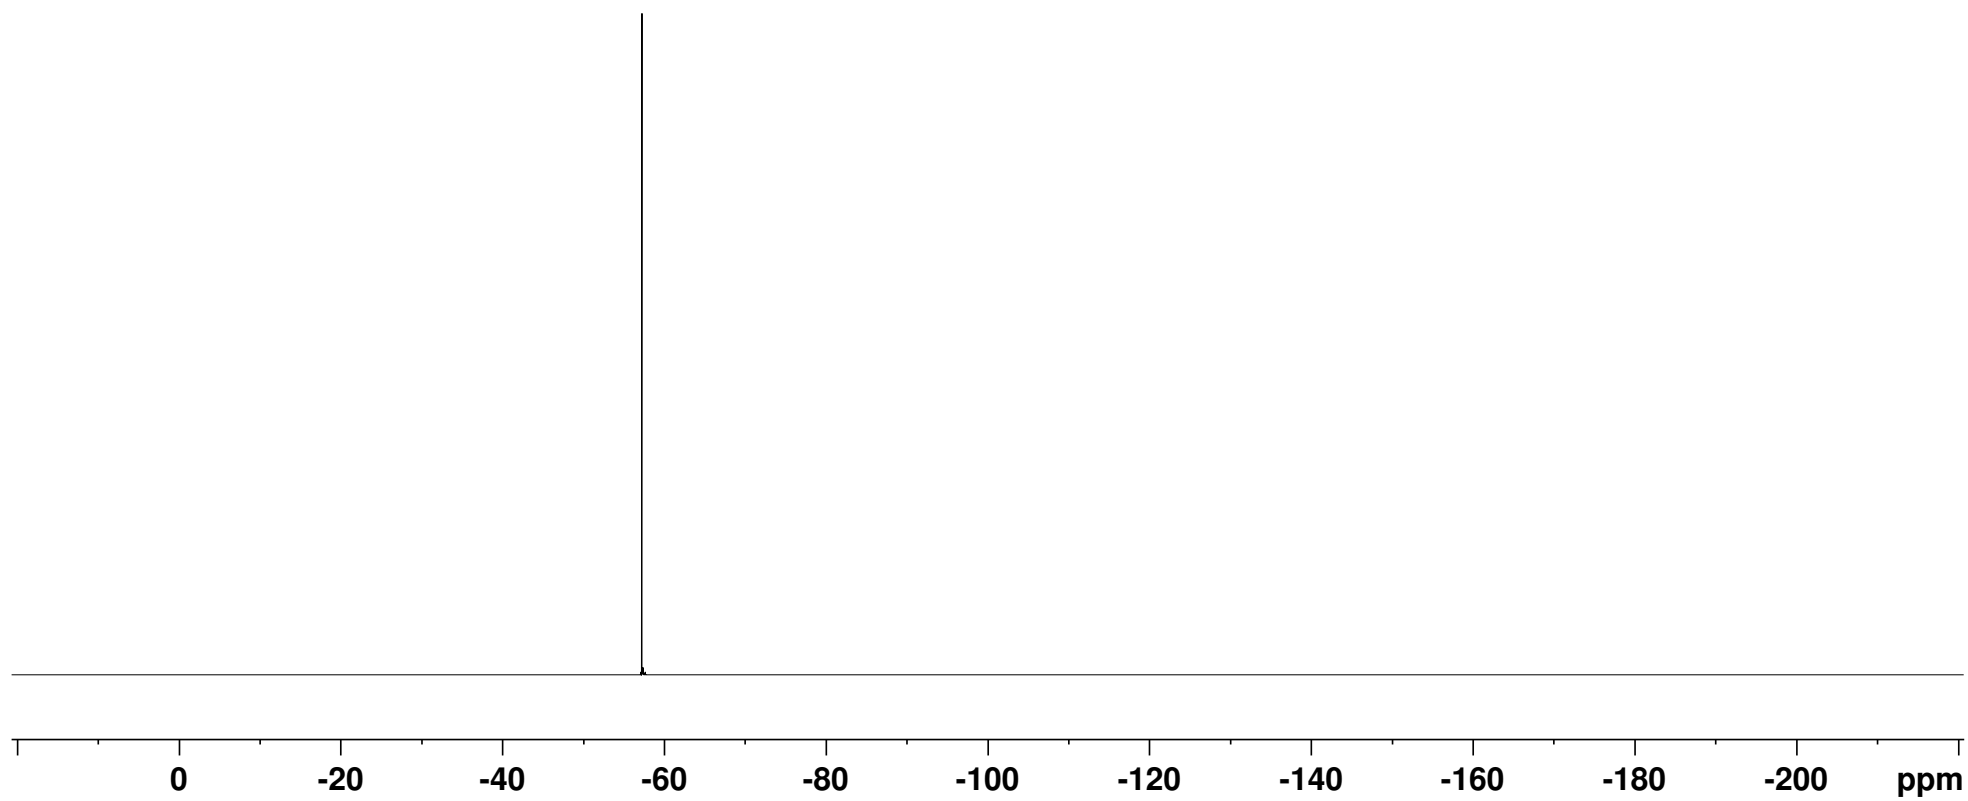

7.683  
7.669  
7.532  
7.518  
7.502  
7.454  
7.437  
7.422  
7.260

2.941  
2.926  
2.911  
2.896  
2.873  
2.857  
2.842  
2.827  
2.758  
2.743  
2.728  
2.713  
2.574  
2.559  
2.543  
2.528  
1.326  
1.311  
1.293  
1.278  
1.264  
1.252  
1.238  
1.223

AS-375

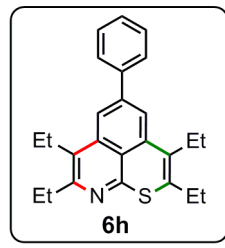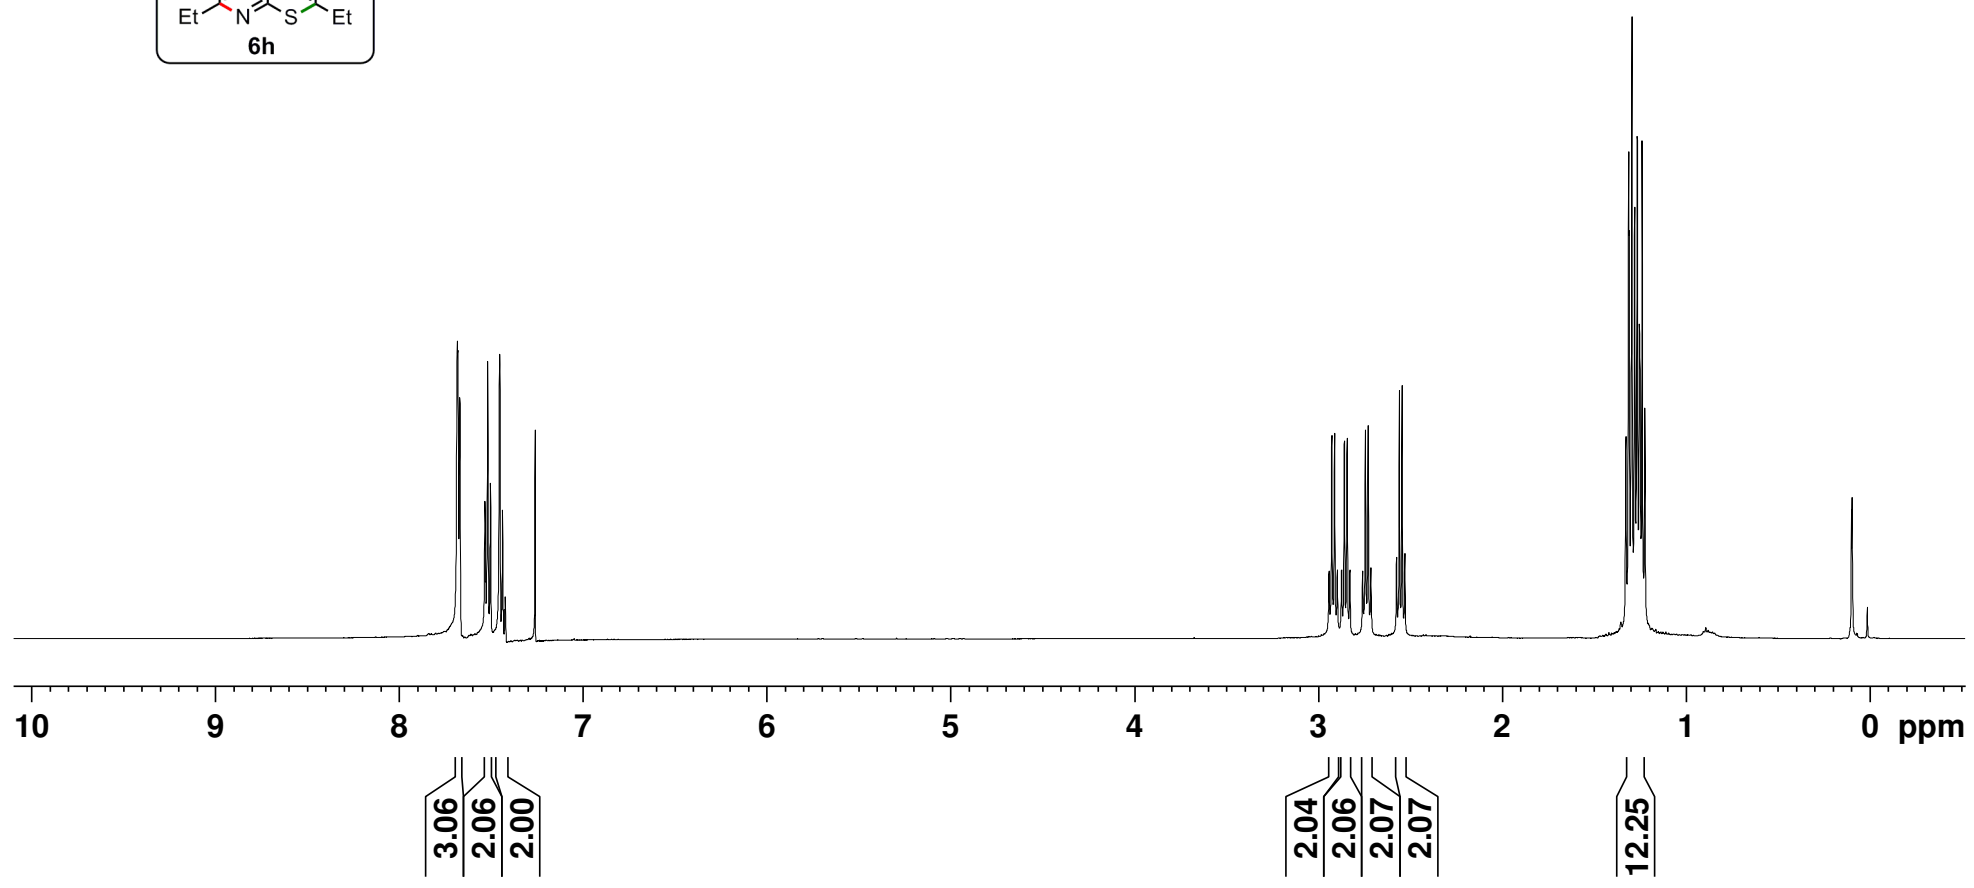

AS-375

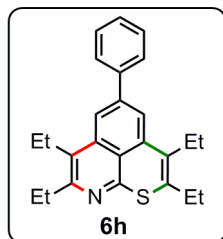

155.72  
153.90  
143.56  
141.59  
137.33  
136.27  
136.06  
128.88  
128.33  
127.92  
127.54  
124.99  
123.18  
118.18  
118.00

77.25  
77.00  
76.75

28.06  
27.52  
21.79  
20.84  
14.44  
14.34  
13.97  
12.88

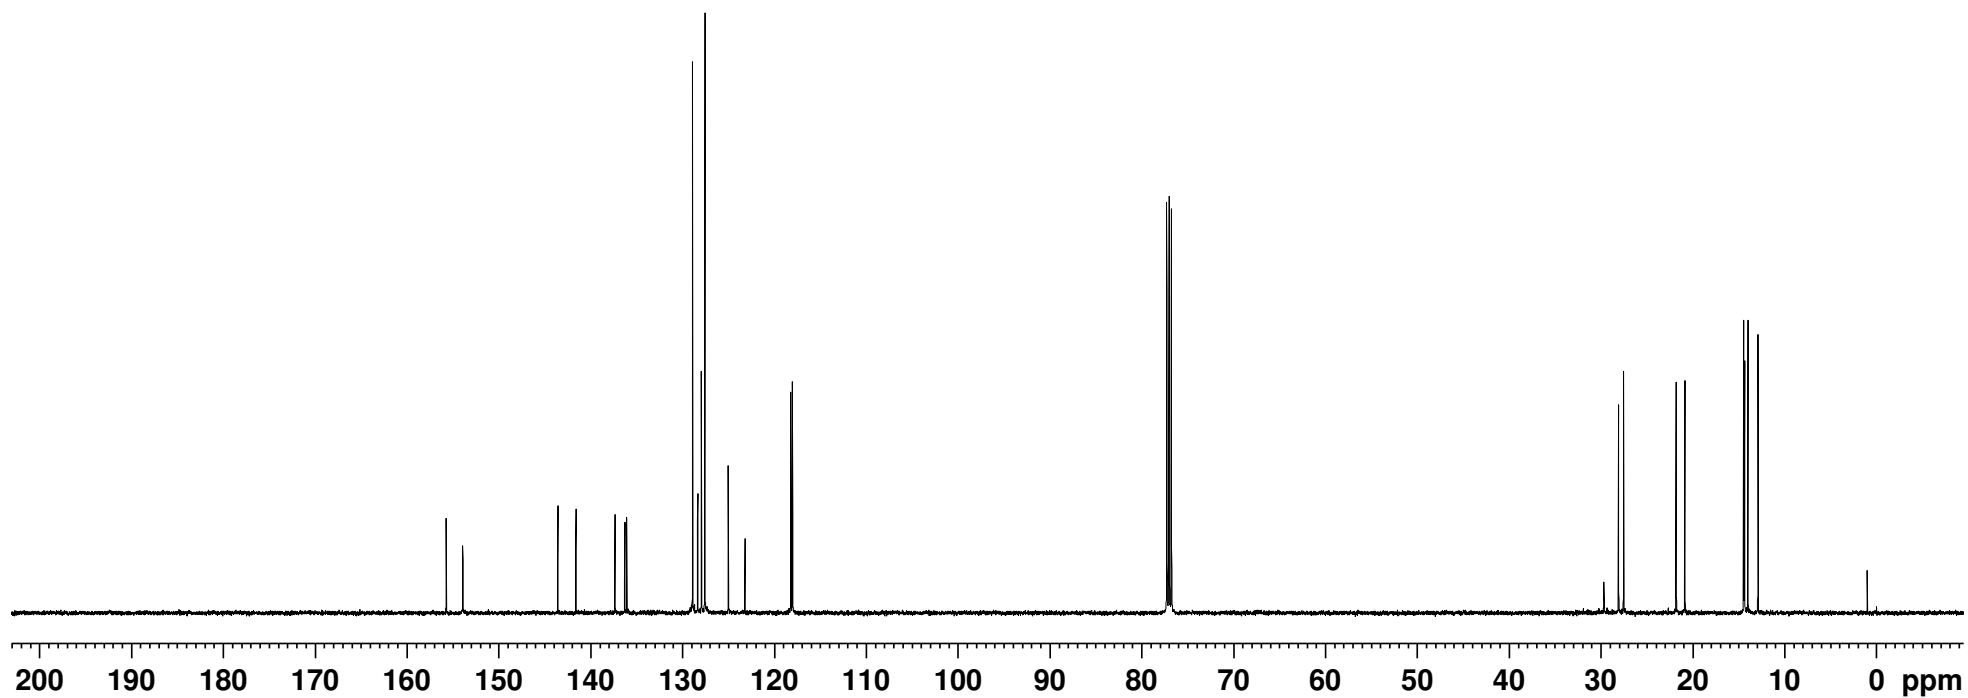



AS-376

7.635  
7.631  
7.279  
7.275  
7.260

2.837  
2.818  
2.804  
2.799  
2.786  
2.767  
2.654  
2.635  
2.616  
2.598  
2.560  
2.541  
2.522  
2.503  
1.290  
1.283  
1.271  
1.264  
1.252  
1.246  
1.220  
1.201  
1.195  
1.182  
1.176  
1.157

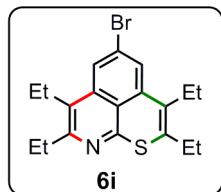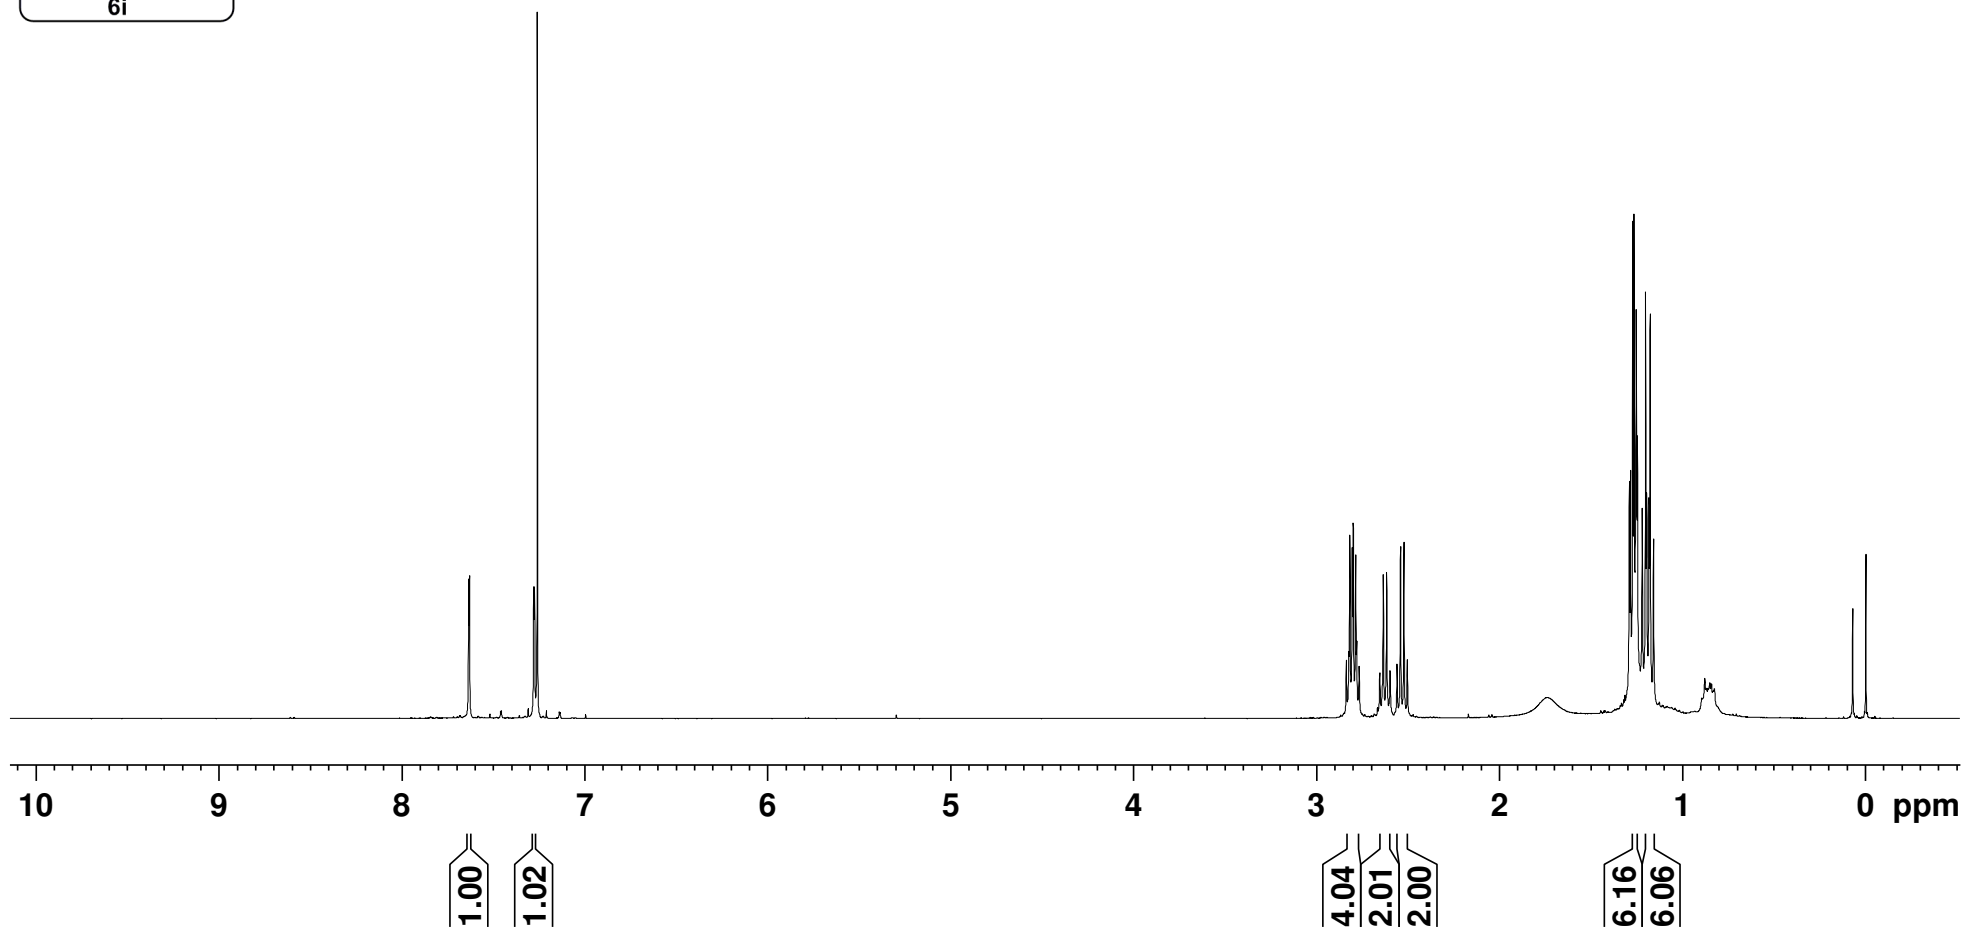

AS-376

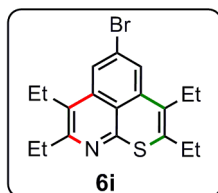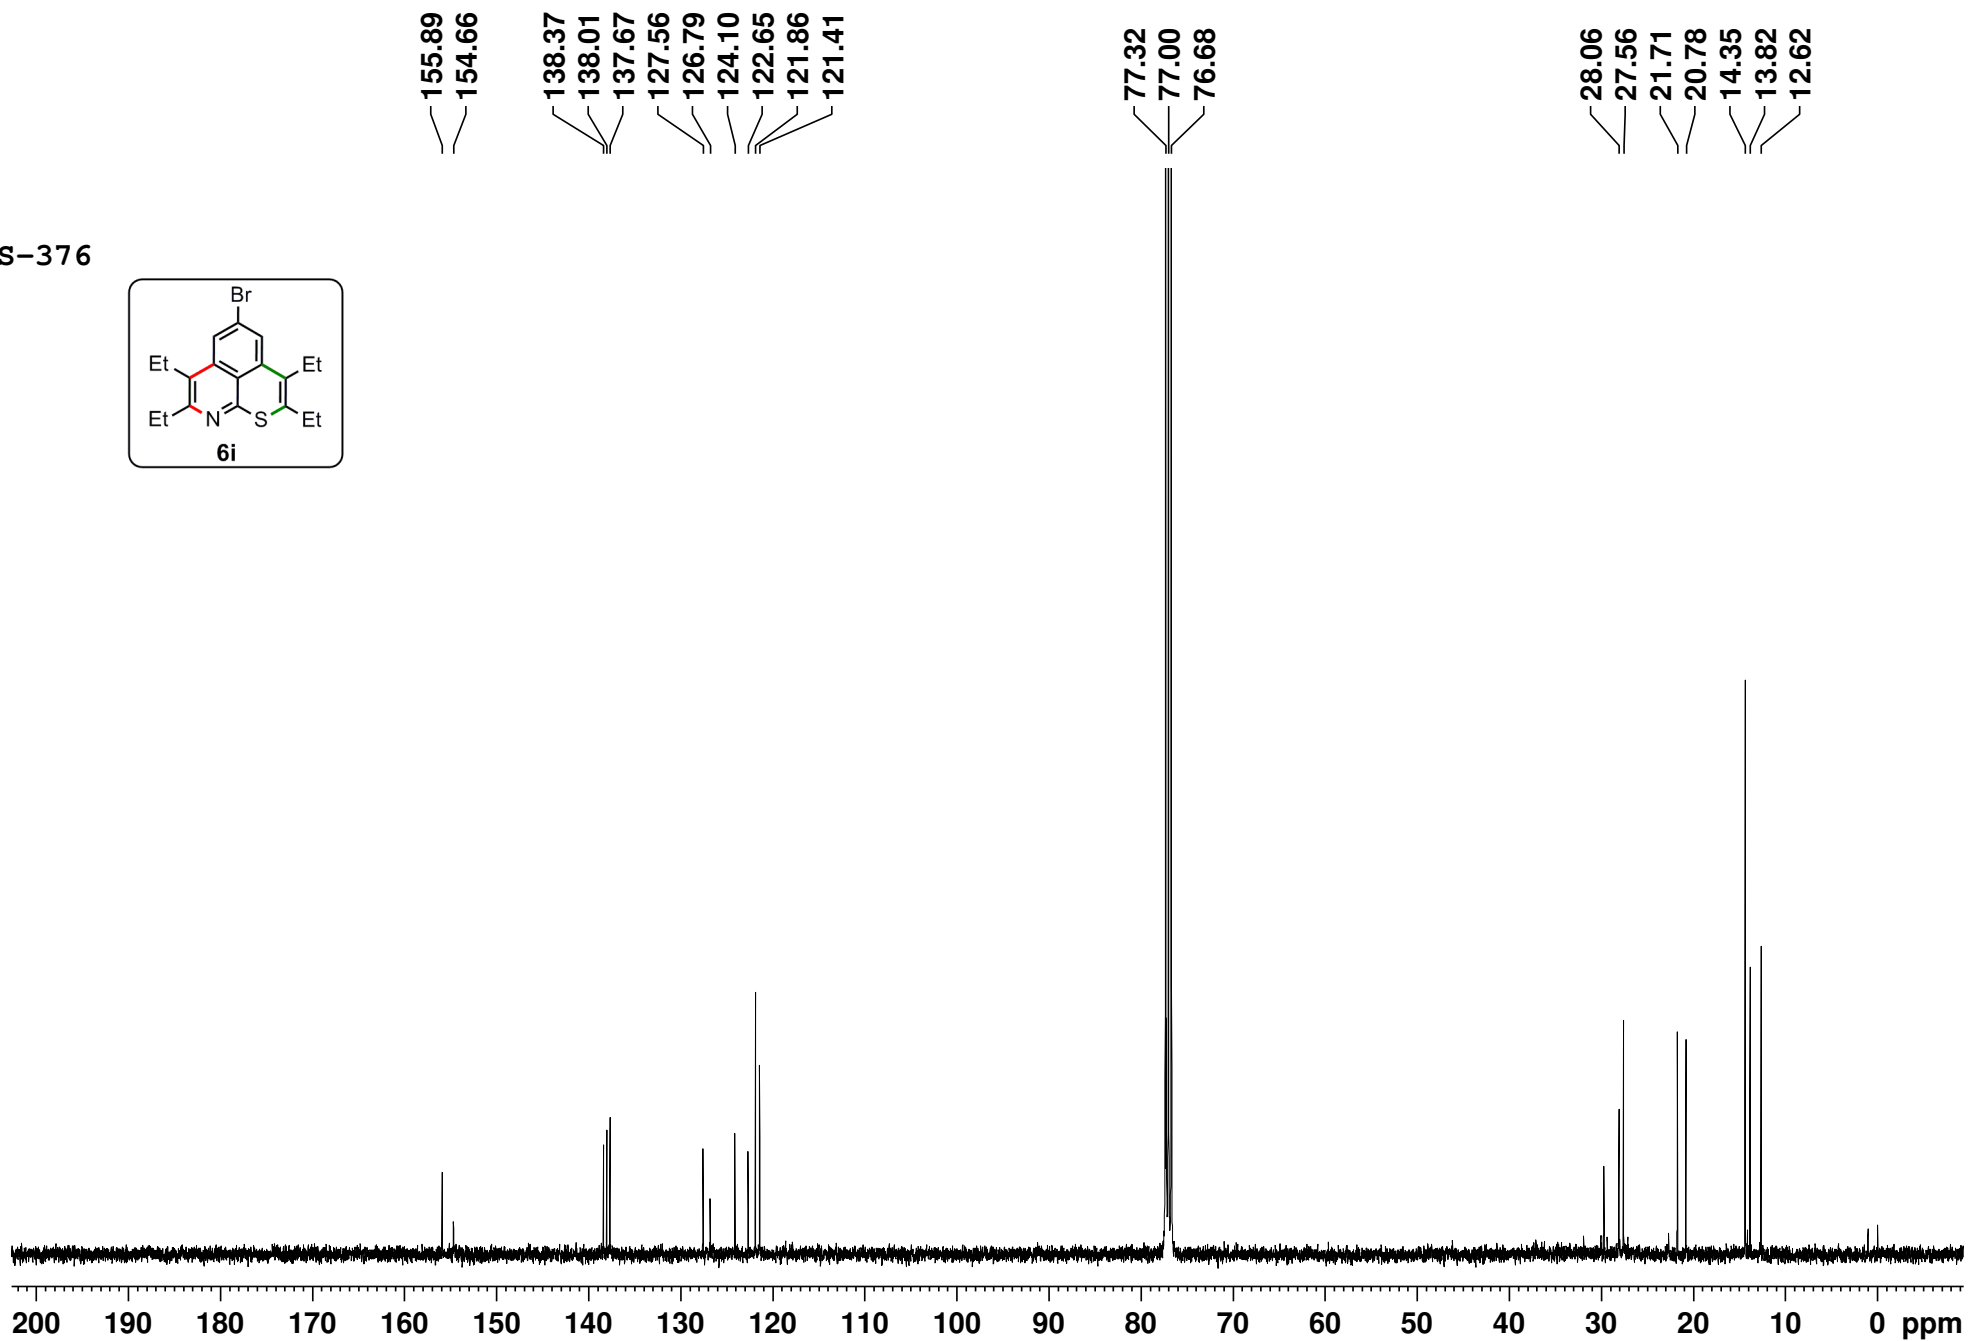

Majji-MJ-16- 113

— 8.216  
— 7.793  
— 7.260

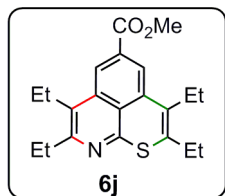

3.985  
2.926  
2.911  
2.895  
2.880  
2.851  
2.836  
2.821  
2.806  
2.727  
2.712  
2.697  
2.682  
2.552  
2.537  
2.522  
2.507  
1.299  
1.284  
1.268  
1.253  
1.246  
1.231  
1.215  
1.209  
1.194  
1.179

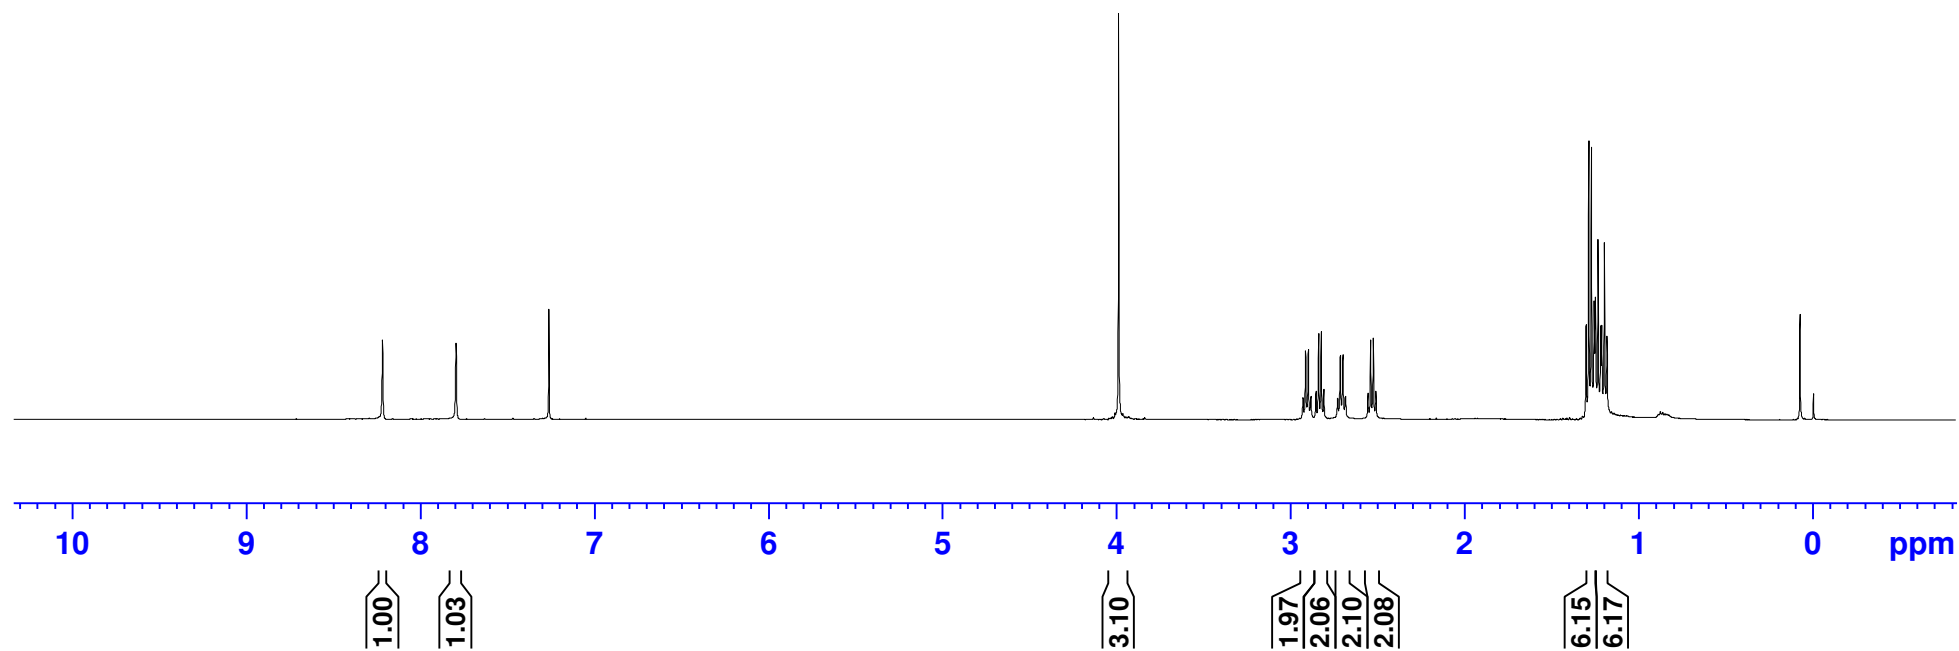

167.11  
155.98  
154.48  
136.71  
136.66  
136.16  
131.78  
128.39  
125.97  
125.56  
121.90  
117.82  
77.25  
77.20  
76.99  
76.74  
52.44  
28.01  
27.49  
21.78  
20.81  
14.30  
14.27  
14.20  
12.76

Majji-MJ-16- 113

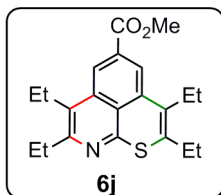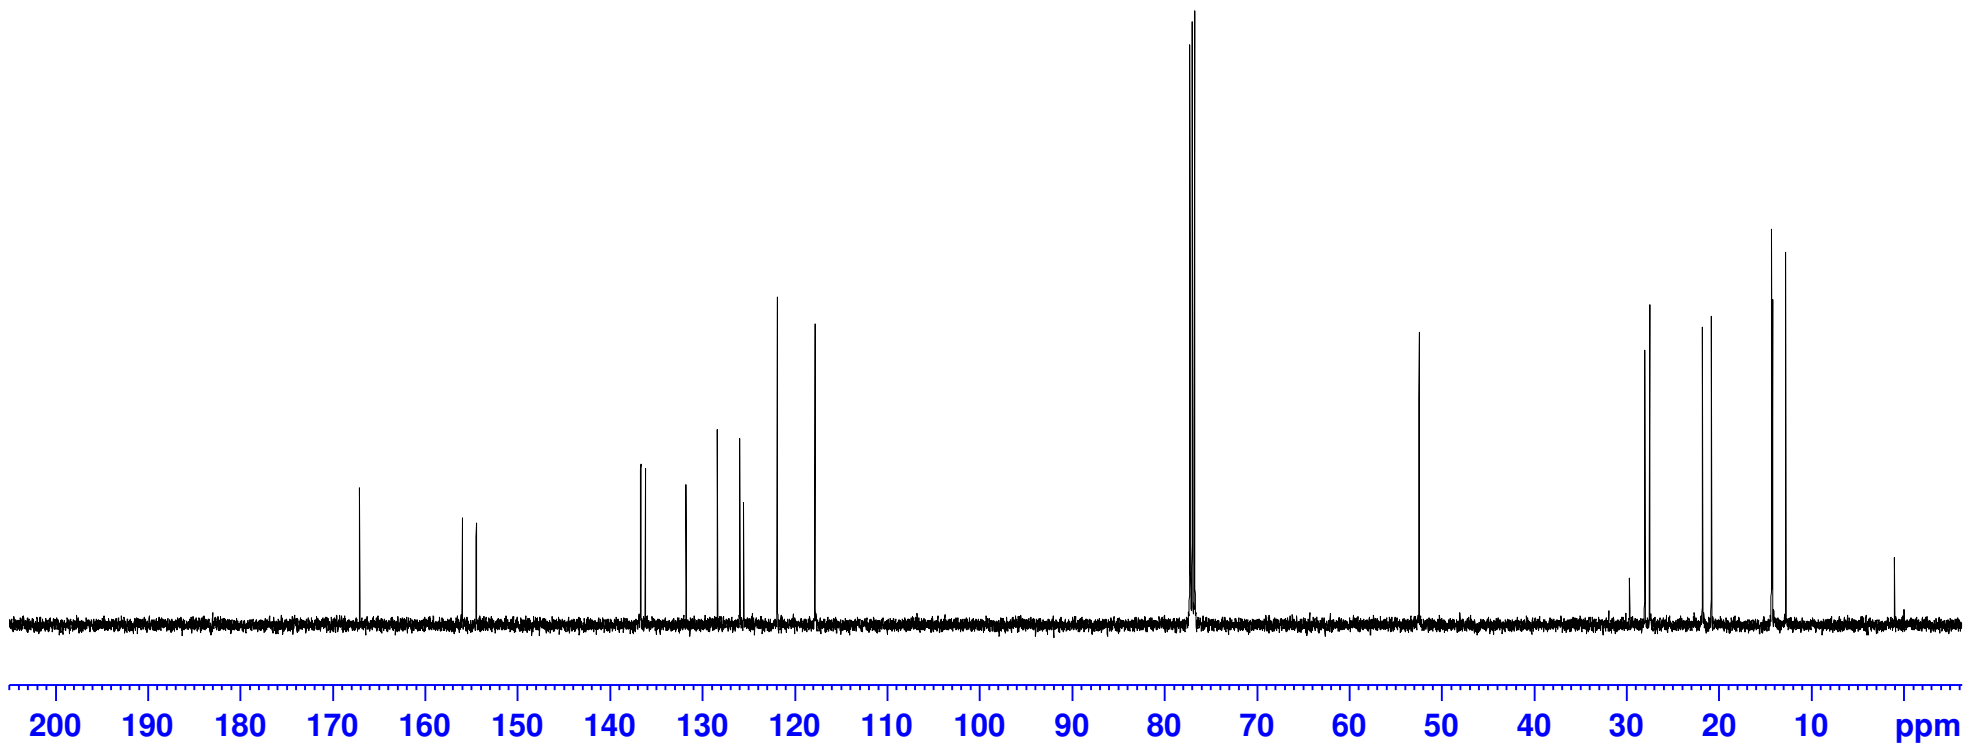

AG-6-143

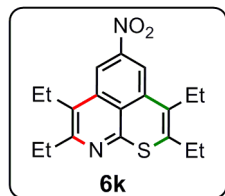

7.555  
7.534  
7.523  
7.518  
7.502  
7.260  
7.247  
7.241  
7.231  
7.225

2.871  
2.852  
2.832  
2.812  
2.793  
2.681  
2.662  
2.643  
2.624  
2.539  
2.520  
2.501  
2.483  
1.300  
1.281  
1.277  
1.262  
1.258  
1.251  
1.239  
1.224  
1.205  
1.187  
1.169  
1.150

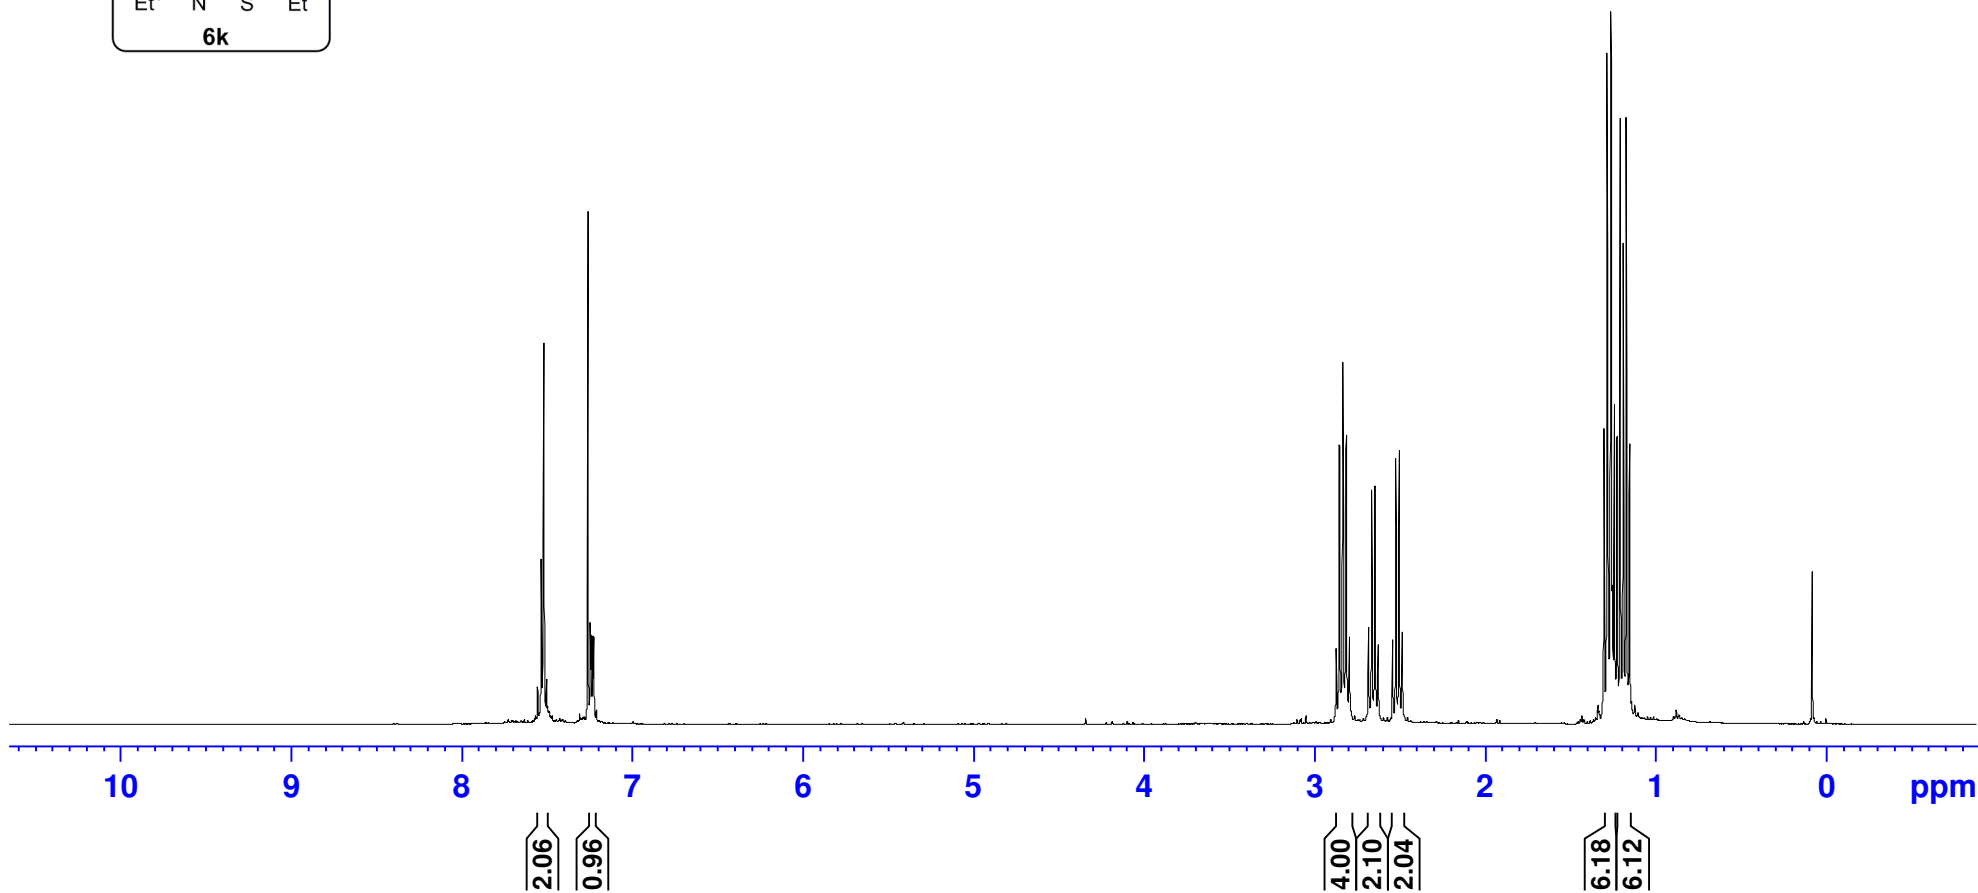

AG-6-143

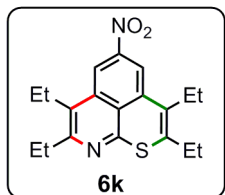

155.84  
153.15

136.92  
135.53  
131.04  
128.31  
124.84  
124.08  
119.66  
118.39

77.32  
77.00  
76.68

27.85  
27.41  
21.70  
20.74  
14.47  
14.31  
13.85  
12.77

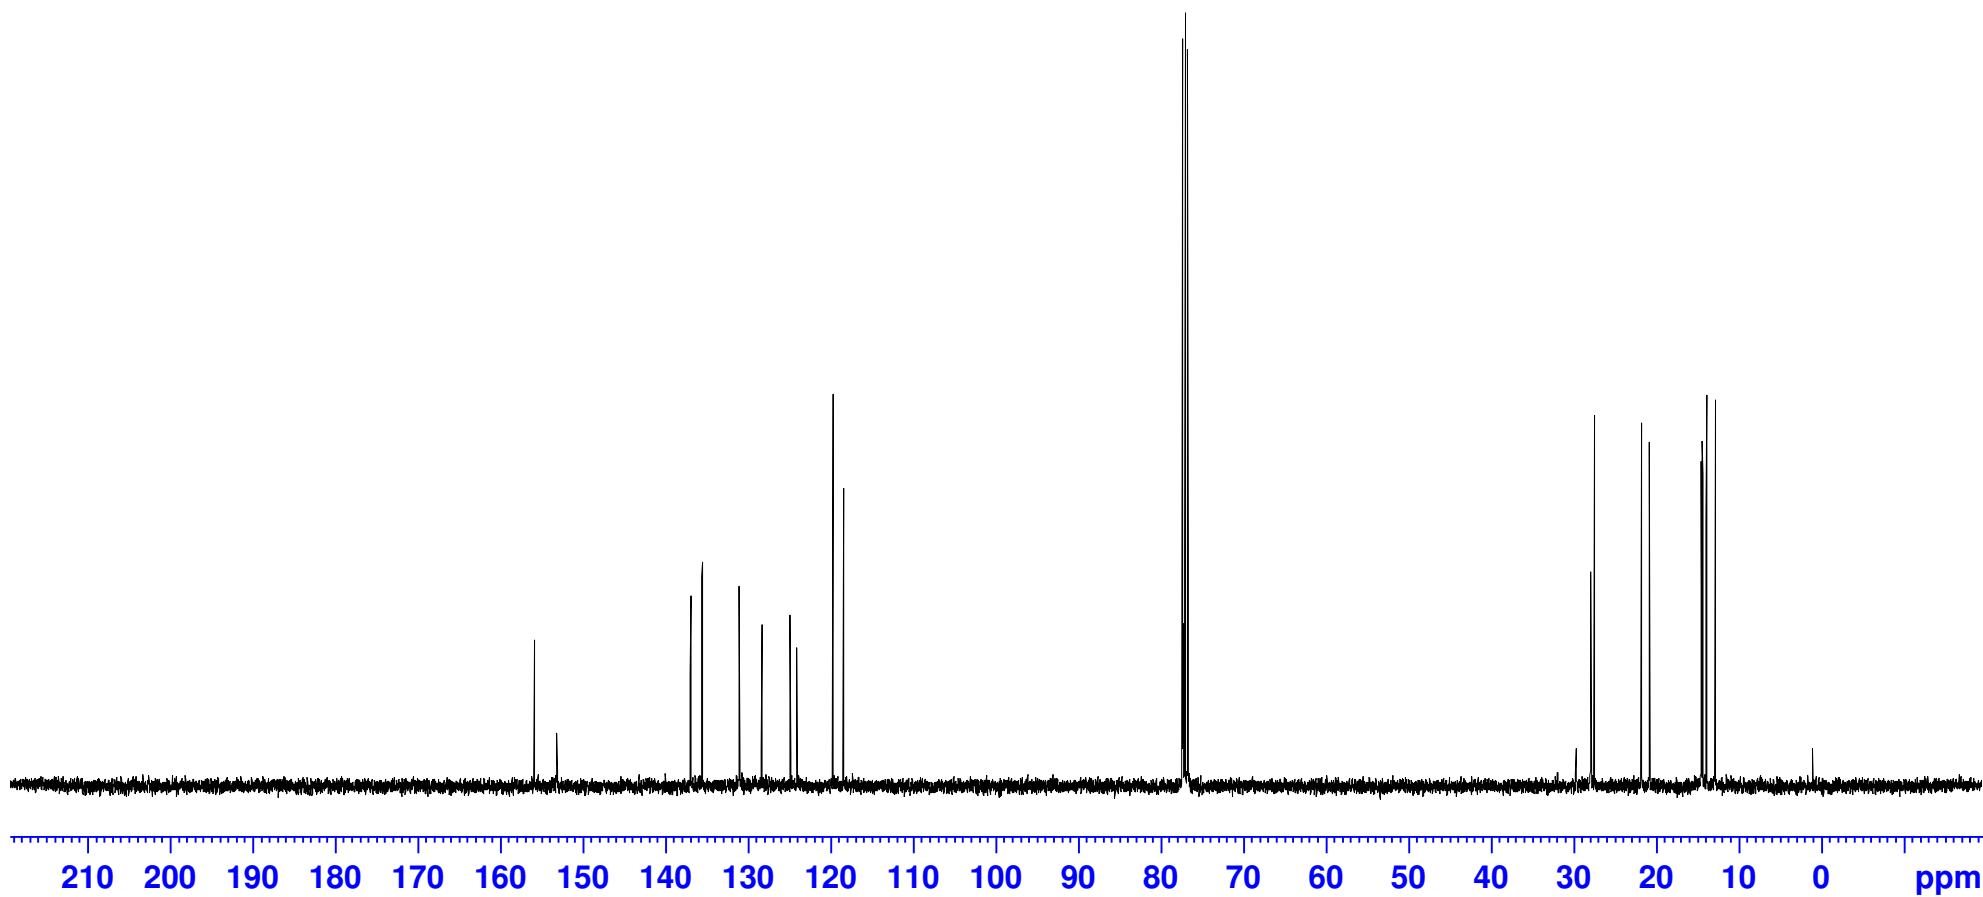

MAJJI-17-256-R

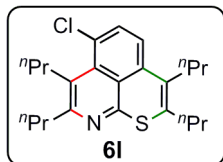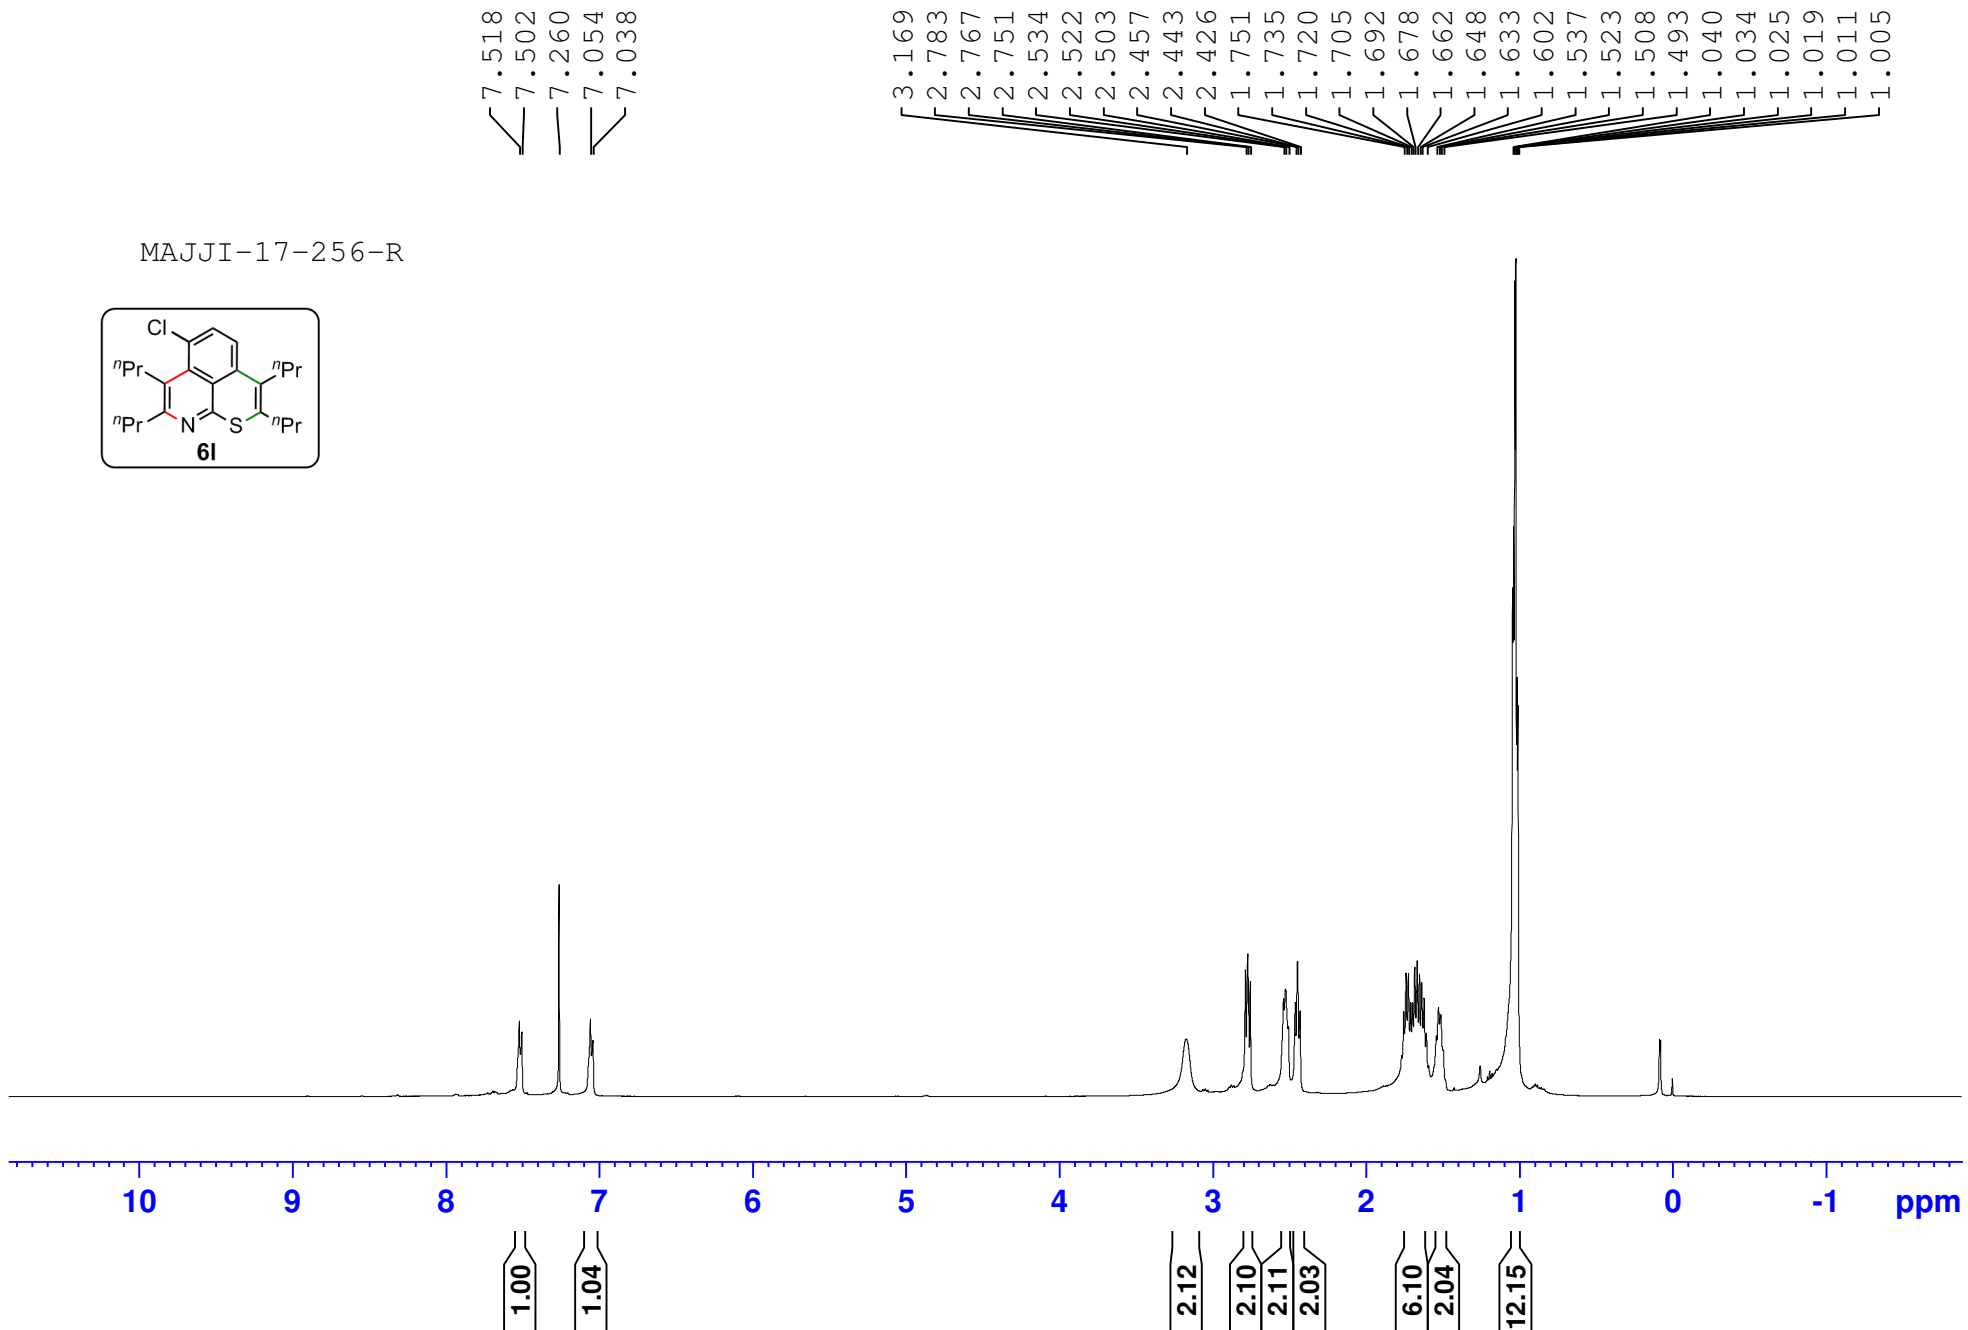

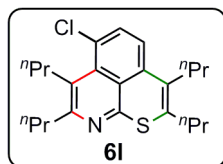

156.19  
155.30

135.38  
135.06  
134.61  
134.57  
127.04  
126.40  
125.36  
123.96  
119.30

77.25  
77.00  
76.75

37.53  
35.85  
31.23  
31.09  
25.45  
23.37  
22.85  
21.14  
14.32  
14.23  
13.95

MAJJI-17-256-R

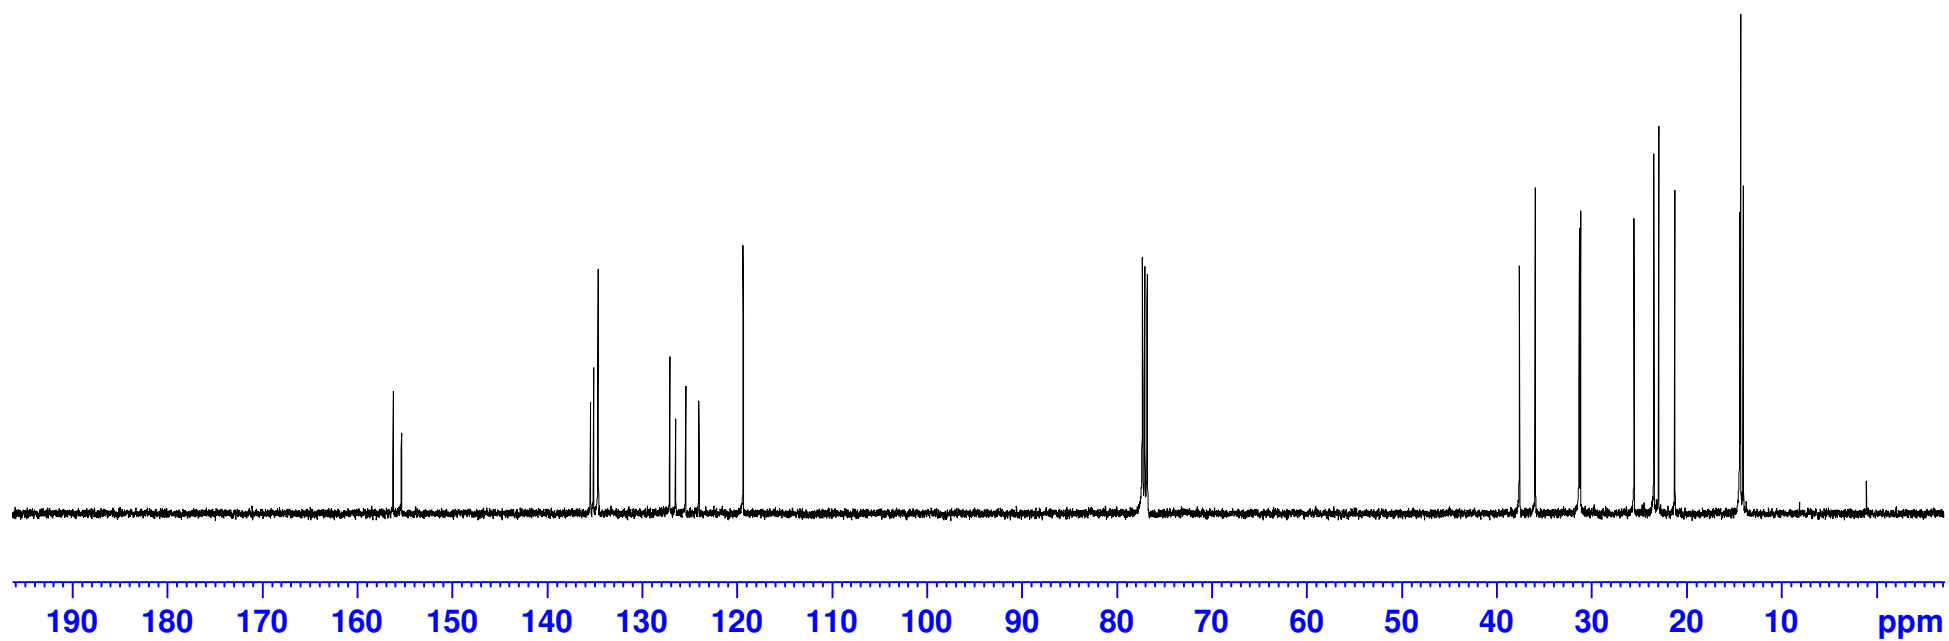



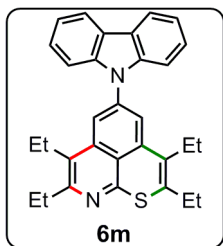

SRS-1-127

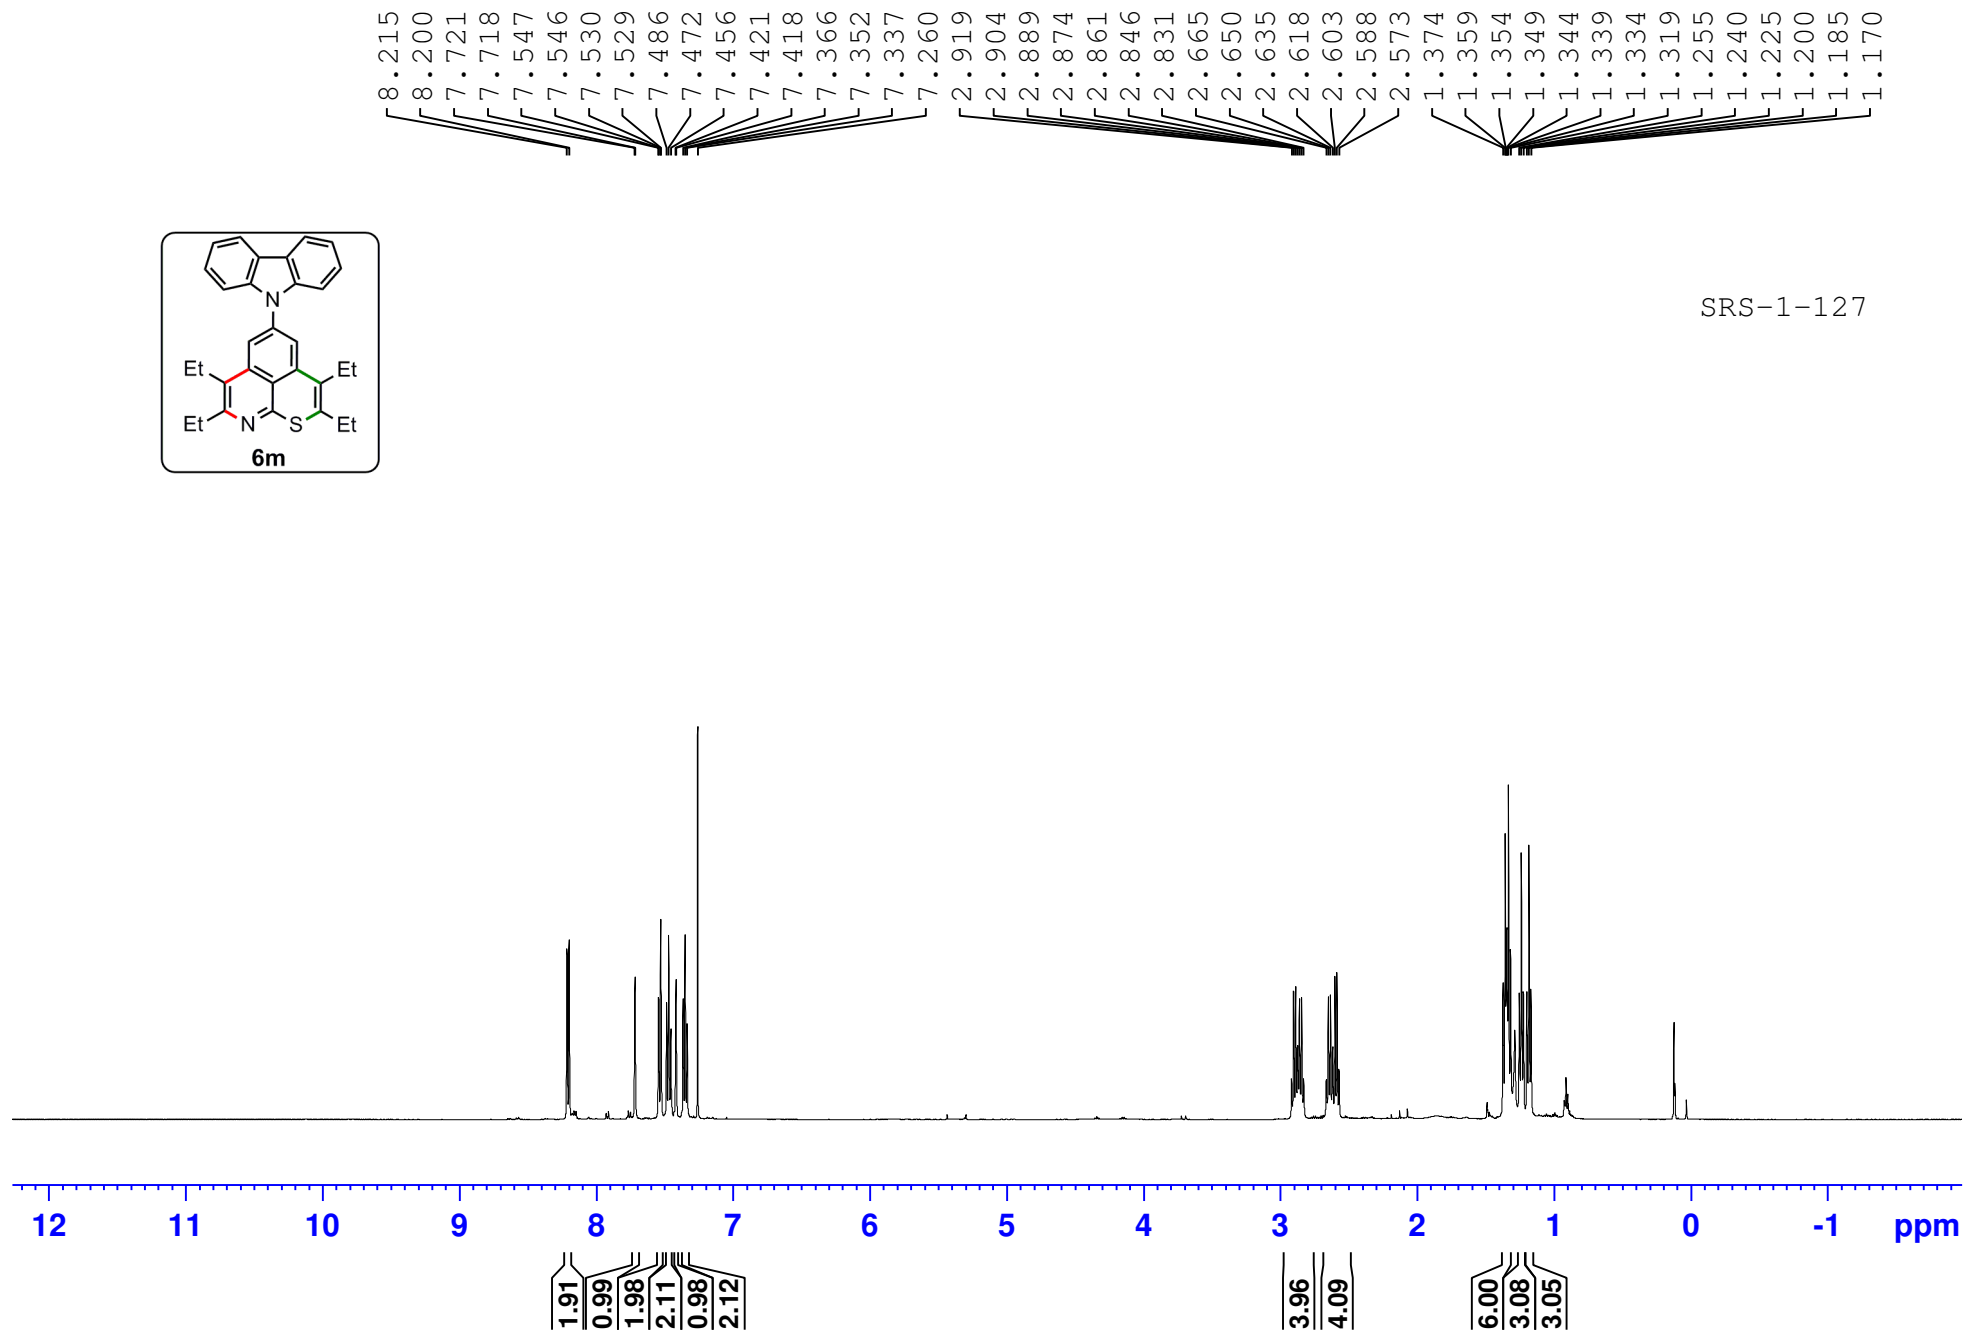

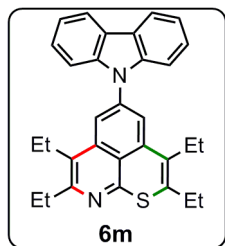

155.87  
154.68

140.55  
140.01  
138.38  
138.09  
137.72

128.04  
126.14  
124.85  
123.58  
122.98  
120.45  
120.21  
117.06  
117.01

109.73

77.25  
77.00  
76.74

28.17  
27.55

21.78  
20.93

14.43  
14.39  
14.08  
12.81

SRS-1-127

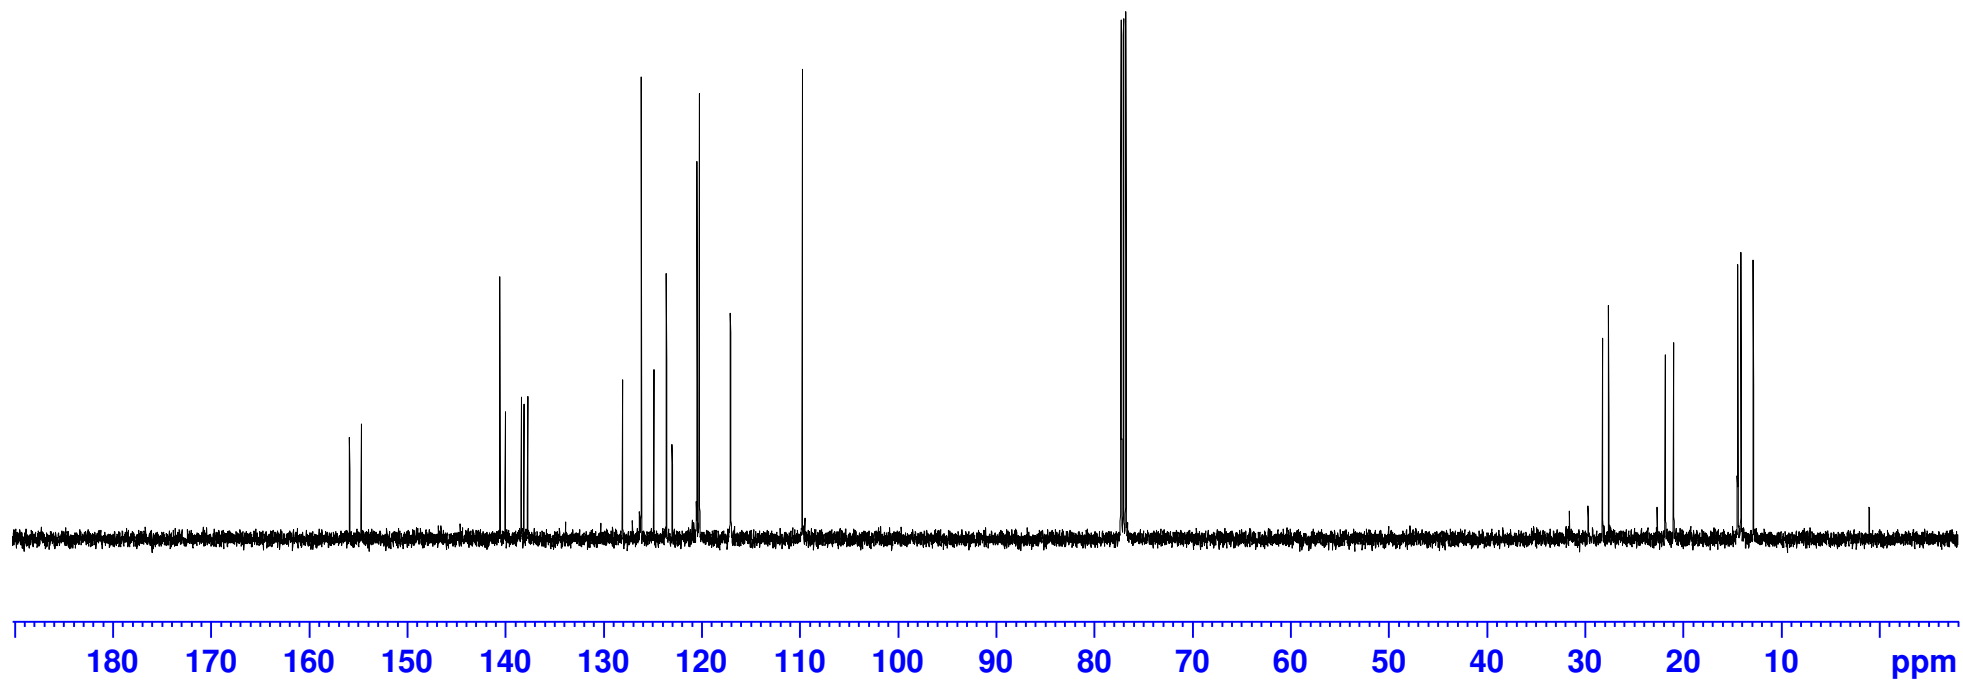

7.960  
7.957  
7.393  
7.390  
7.377  
7.357  
7.355  
7.351  
7.346  
7.336  
7.330  
7.313  
7.296  
7.277  
7.260  
7.250  
7.247  
7.243  
7.234  
7.228  
7.223  
7.216  
7.213  
7.209  
7.201  
7.191  
7.184  
7.172  
7.142  
7.125  
5.068  
5.065  
5.061  
4.204  
4.189  
4.175  
4.159  
1.920  
1.903  
1.677  
1.599  
1.415  
1.394  
1.379  
1.363  
1.347  
1.294  
1.269  
1.237  
0.823  
0.807

AS-413

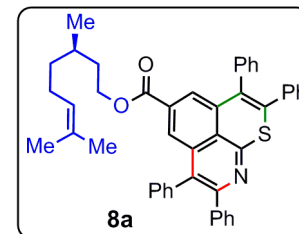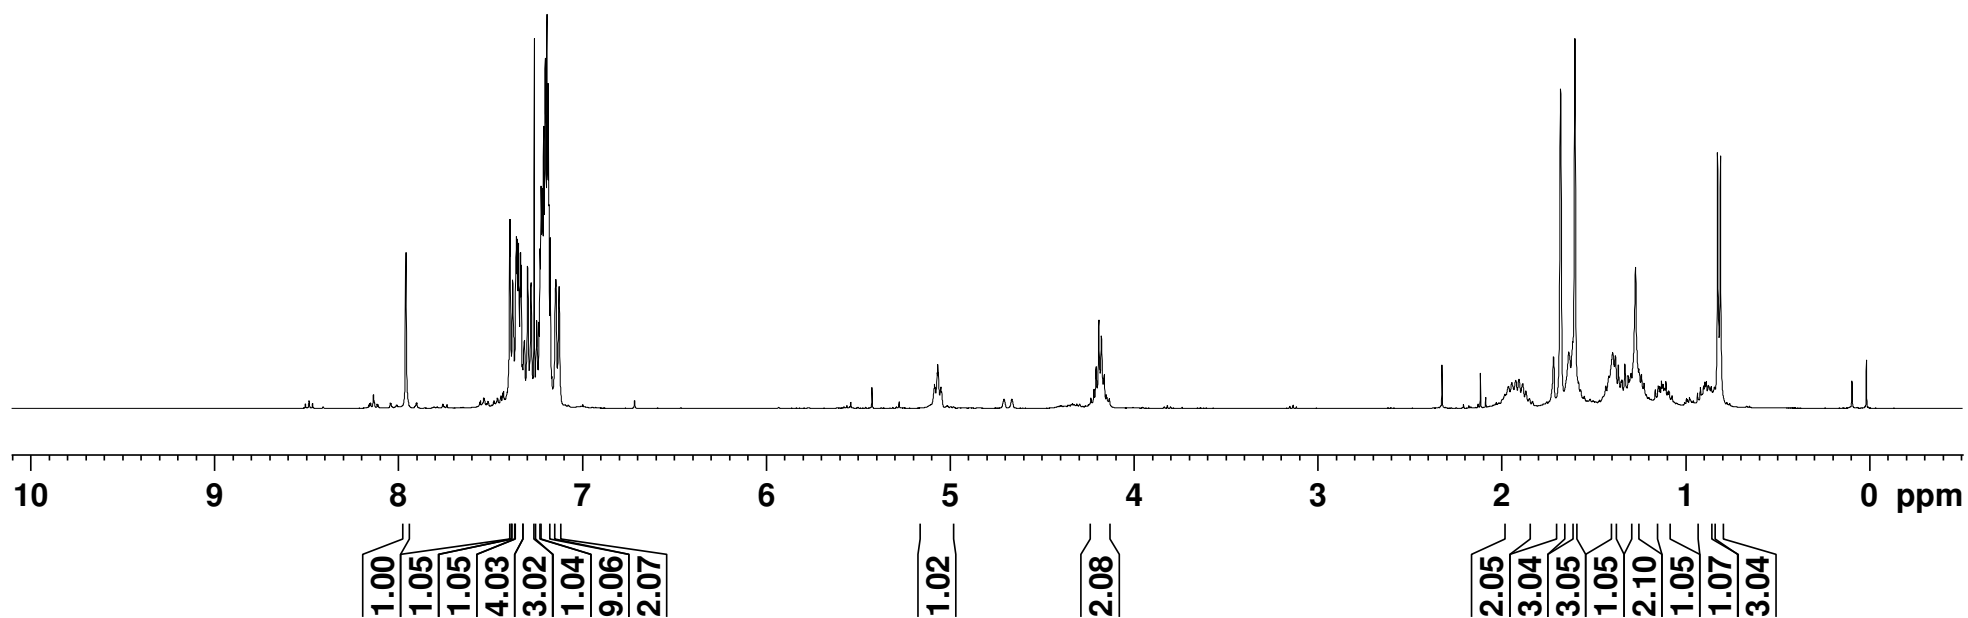

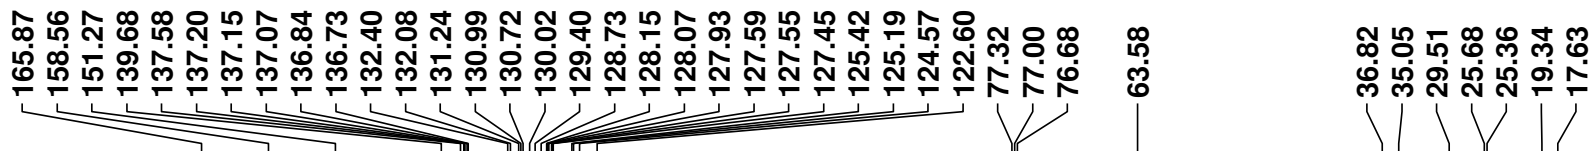

AS-413

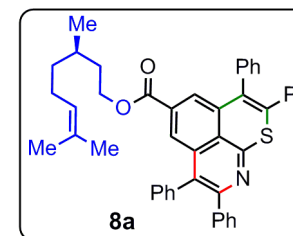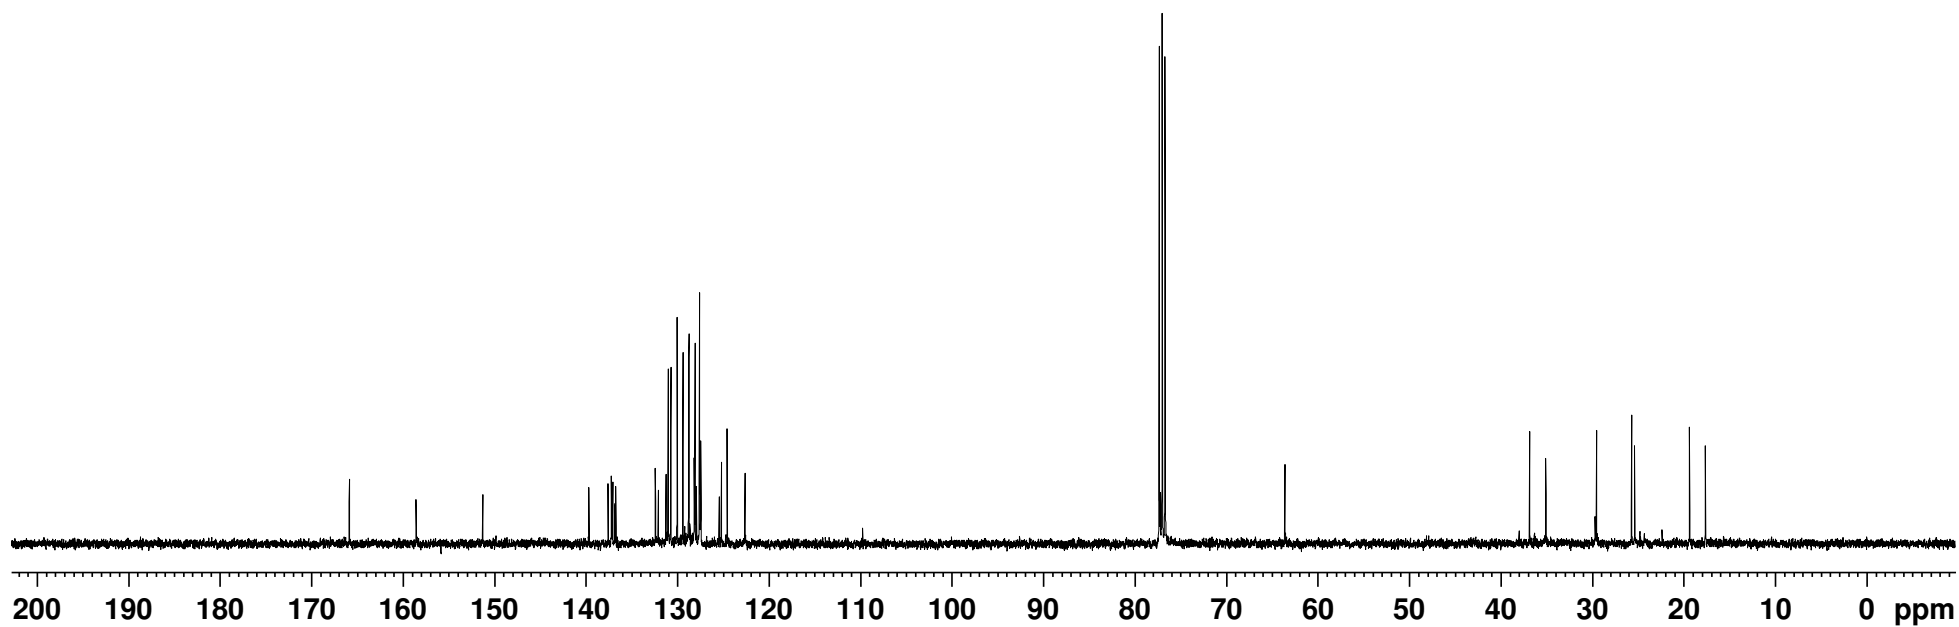

8.226  
7.808  
7.260  
5.102  
4.442  
4.438  
4.428  
4.425  
4.416  
4.411  
2.926  
2.911  
2.896  
2.881  
2.853  
2.838  
2.823  
2.807  
2.727  
2.712  
2.697  
2.683  
2.554  
2.539  
2.524  
2.508  
2.030  
2.016  
2.002  
1.877  
1.860  
1.851  
1.733  
1.706  
1.650  
1.637  
1.623  
1.430  
1.412  
1.299  
1.284  
1.270  
1.255  
1.246  
1.230  
1.215  
1.210  
1.195  
1.180  
1.018  
1.005

AS-406

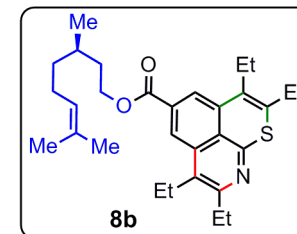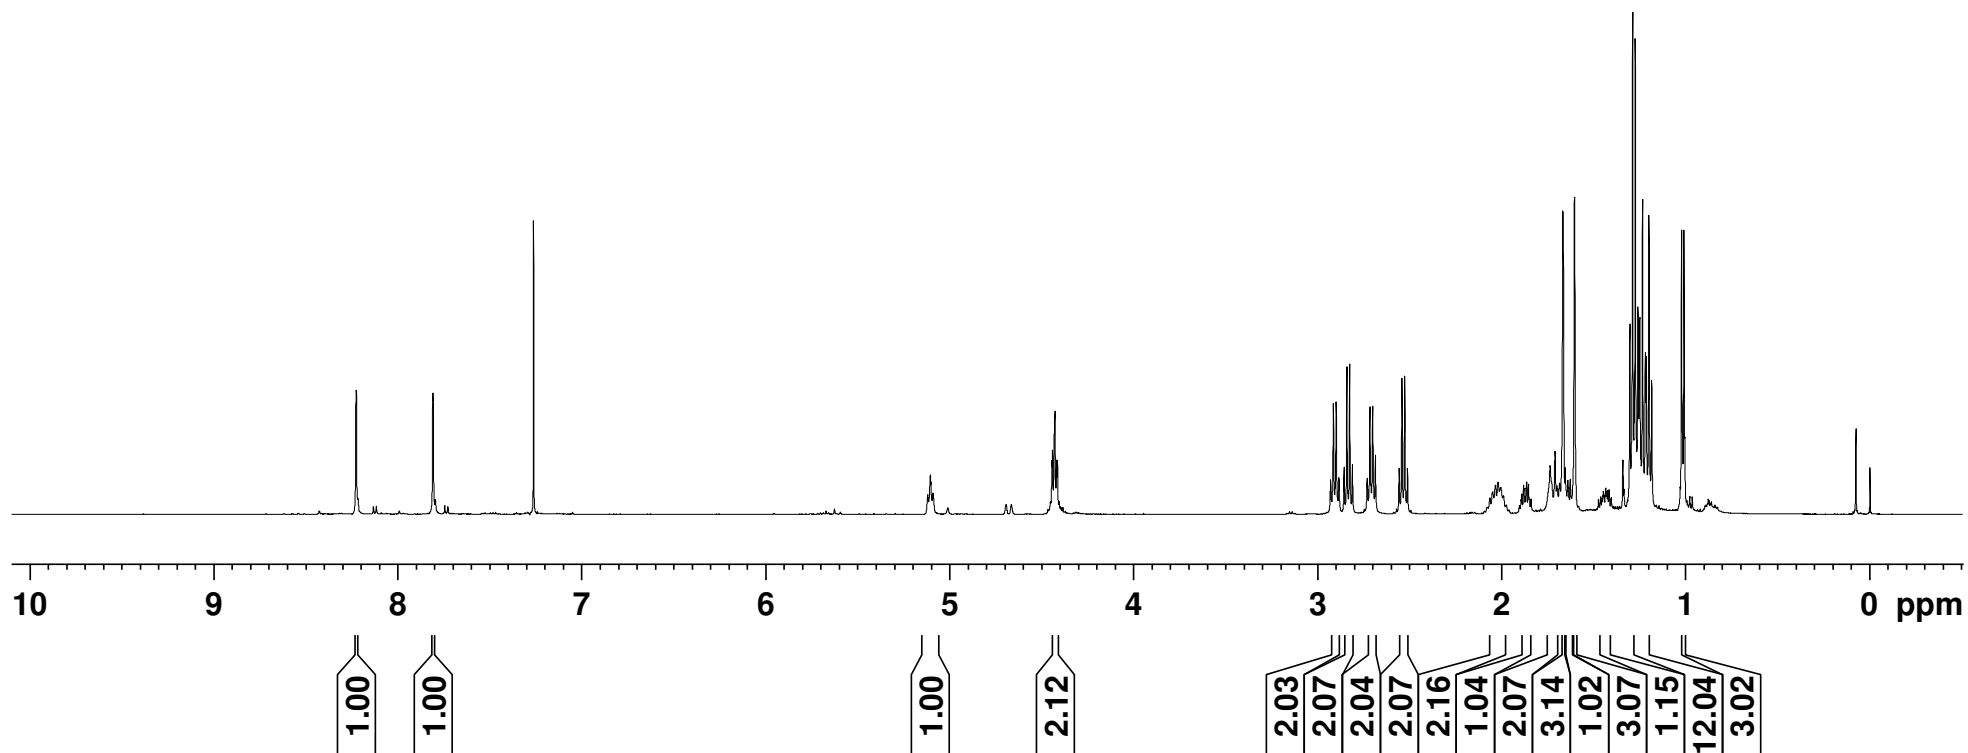

AS-406

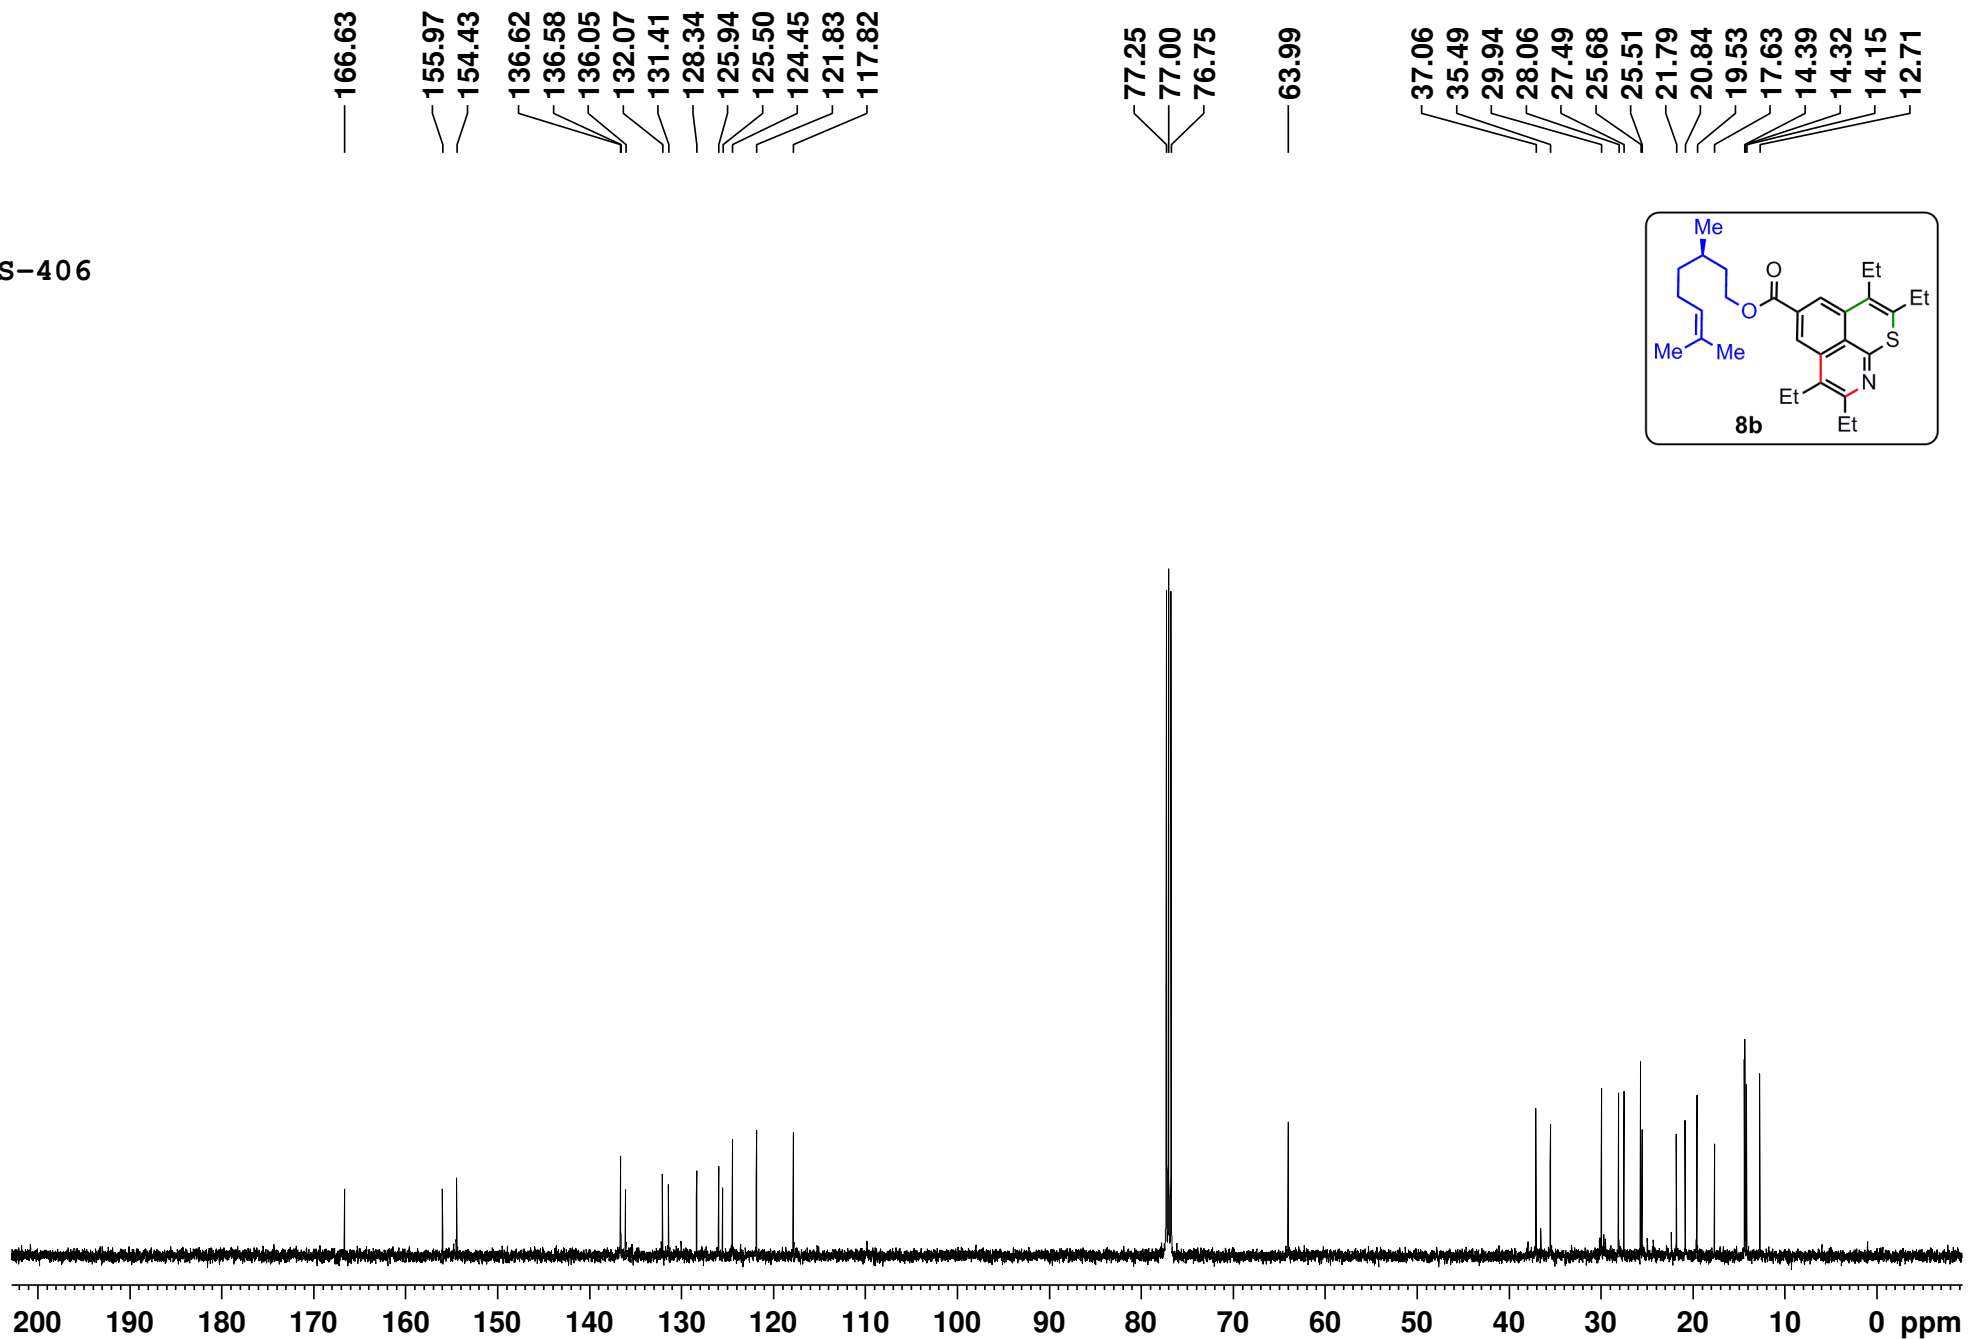

7.957  
7.955  
7.953  
7.395  
7.393  
7.385  
7.371  
7.356  
7.341  
7.341  
7.329  
7.327  
7.322  
7.304  
7.290  
7.274  
7.260  
7.237  
7.214  
7.202  
7.192  
7.185  
7.180  
7.175  
7.170  
7.137  
7.122  
5.280  
5.266  
5.252  
5.075  
5.062  
5.048  
4.656  
4.642

2.076  
2.062  
2.048  
2.032  
2.003  
1.987  
1.974  
1.668  
1.609  
1.598

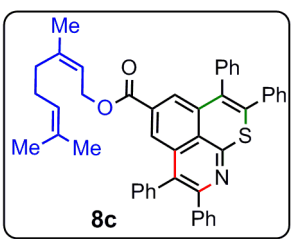

MAJJI-17-213

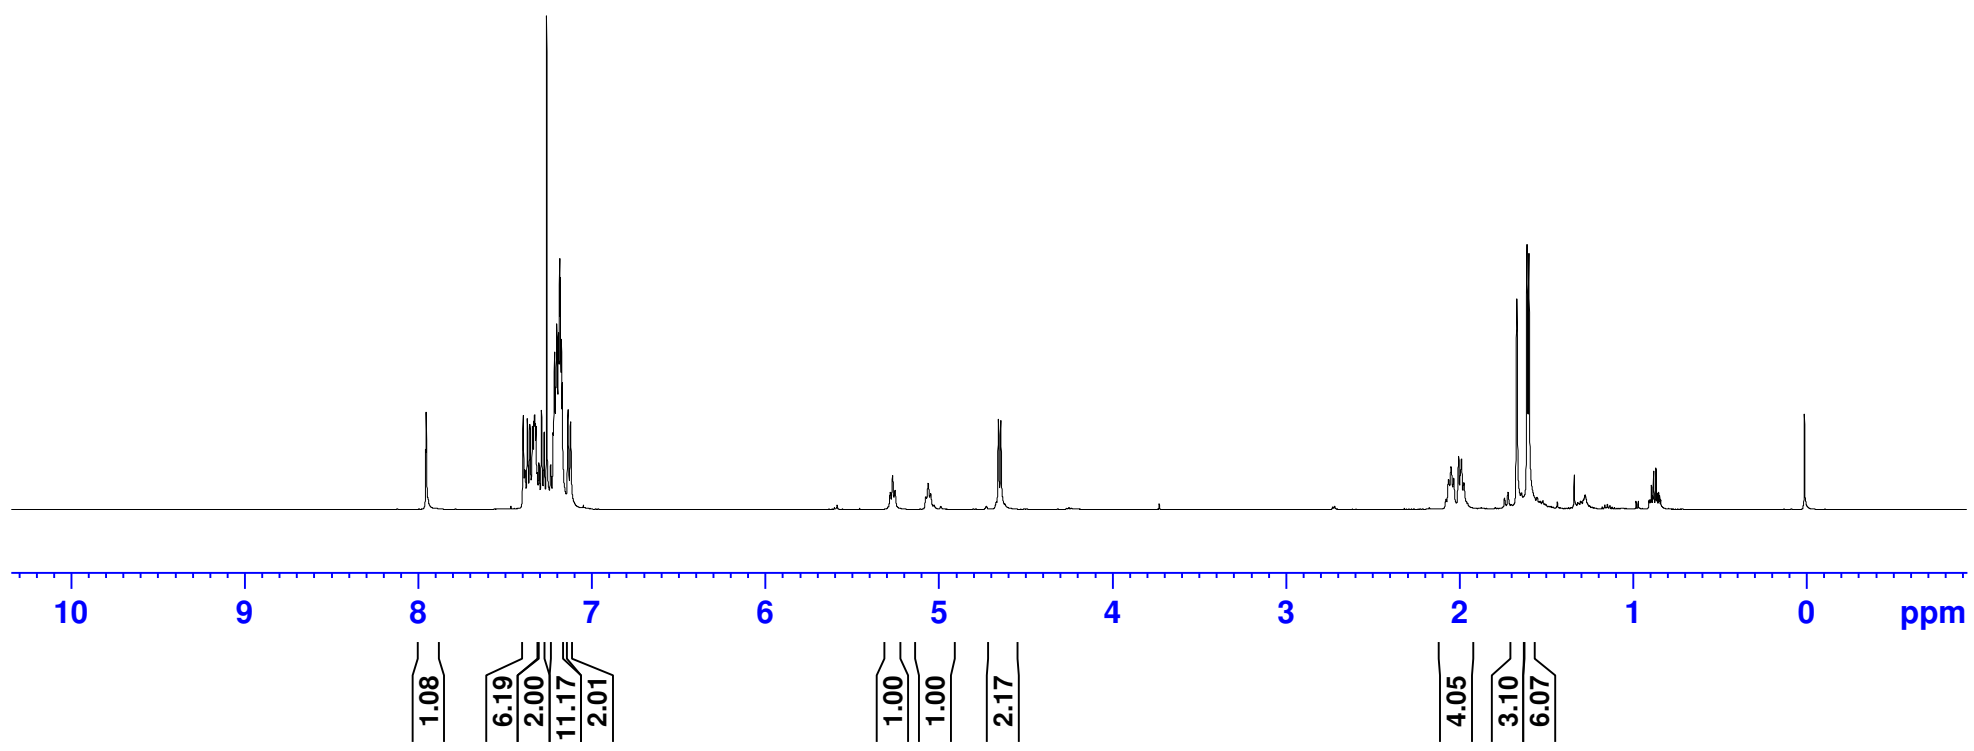

165.87  
158.56  
151.28  
142.87  
139.69  
137.57  
137.23  
137.12  
136.84  
136.75  
132.57  
132.13  
131.79  
131.05  
130.77  
130.04  
129.42  
128.75  
128.73  
128.15  
128.08  
127.96  
127.59  
127.55  
127.44  
125.45  
125.20  
123.70  
122.73  
117.81

77.25  
77.00  
76.74

61.98

39.41

26.31  
25.65

17.66  
16.54

MAJJI-17-213

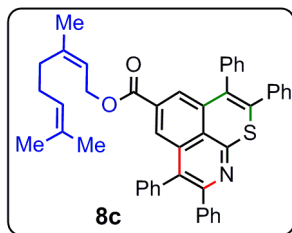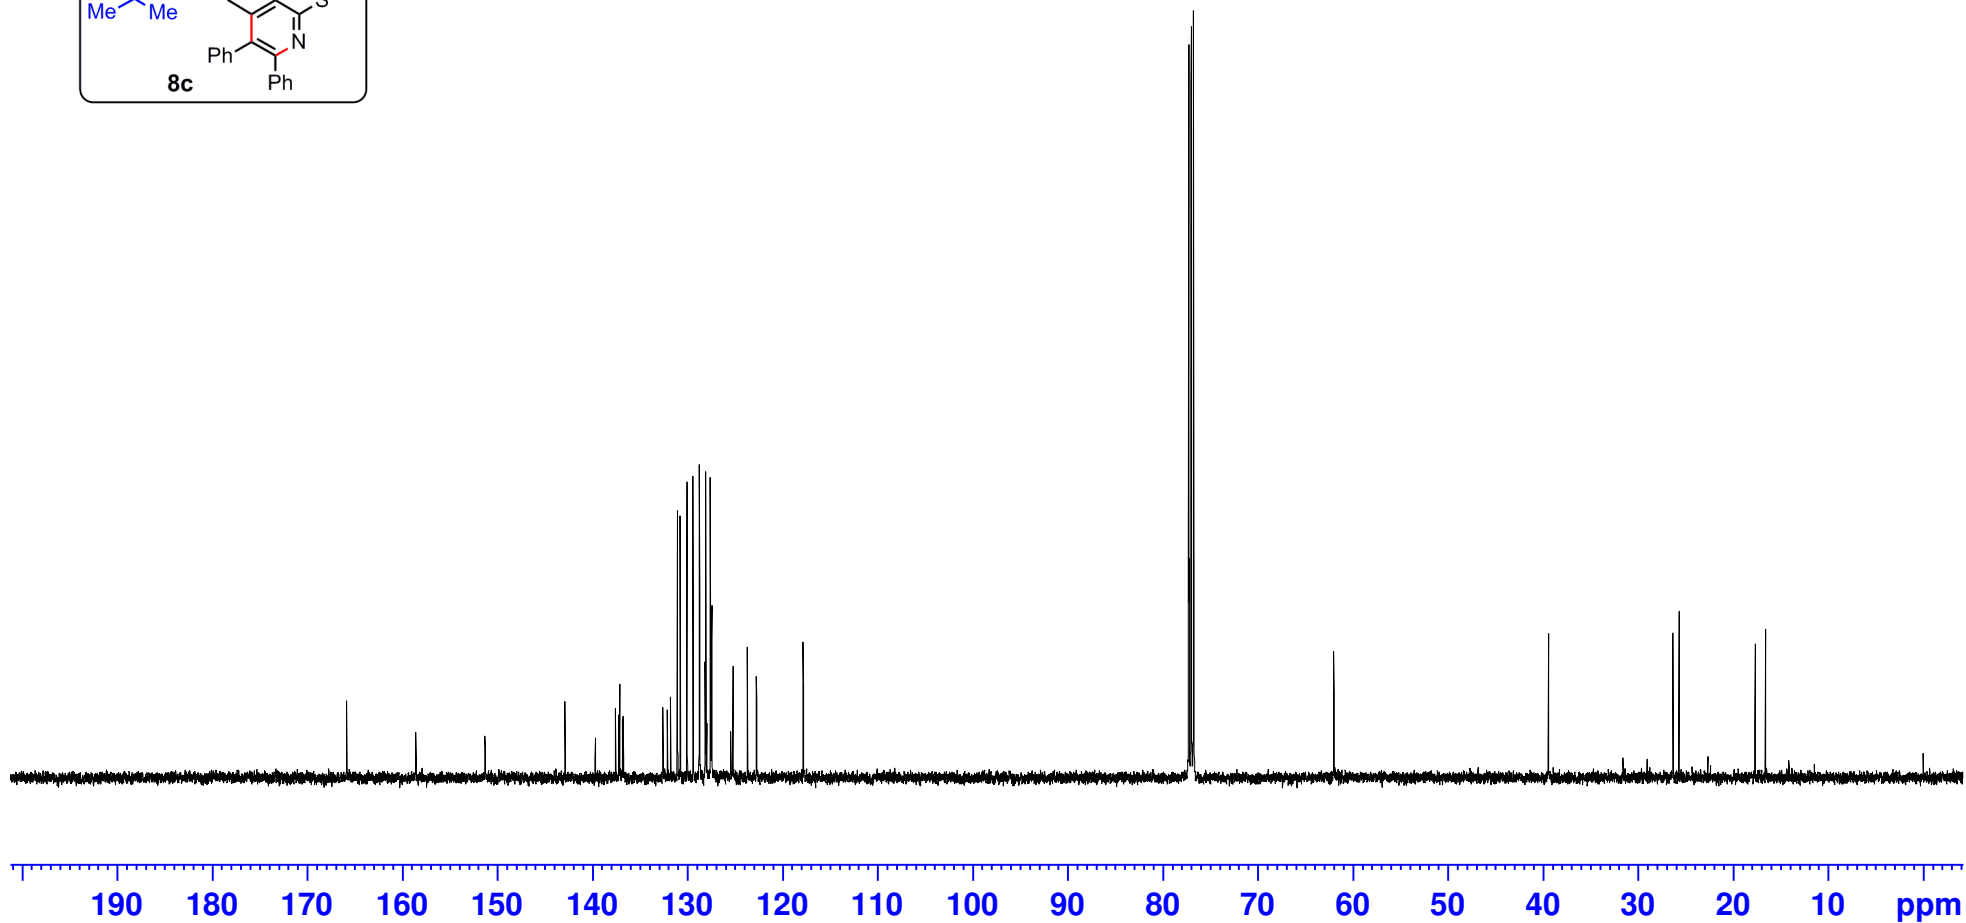



8.231  
7.829  
7.260  
4.971  
4.963  
4.950  
4.941  
4.928  
2.931  
2.916  
2.901  
2.886  
2.859  
2.844  
2.829  
2.814  
2.734  
2.719  
2.704  
2.689  
2.559  
2.544  
2.529  
2.514  
2.218  
2.194  
1.999  
1.994  
1.985  
1.980  
1.972  
1.966  
1.763  
1.738  
1.625  
1.601  
1.300  
1.285  
1.270  
1.255  
1.246  
1.231  
1.216  
1.198  
1.183  
1.166  
0.958  
0.947  
0.933  
0.844  
0.830

AS-405

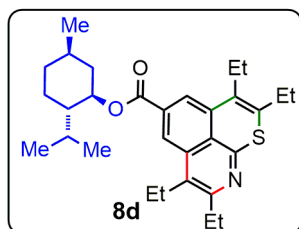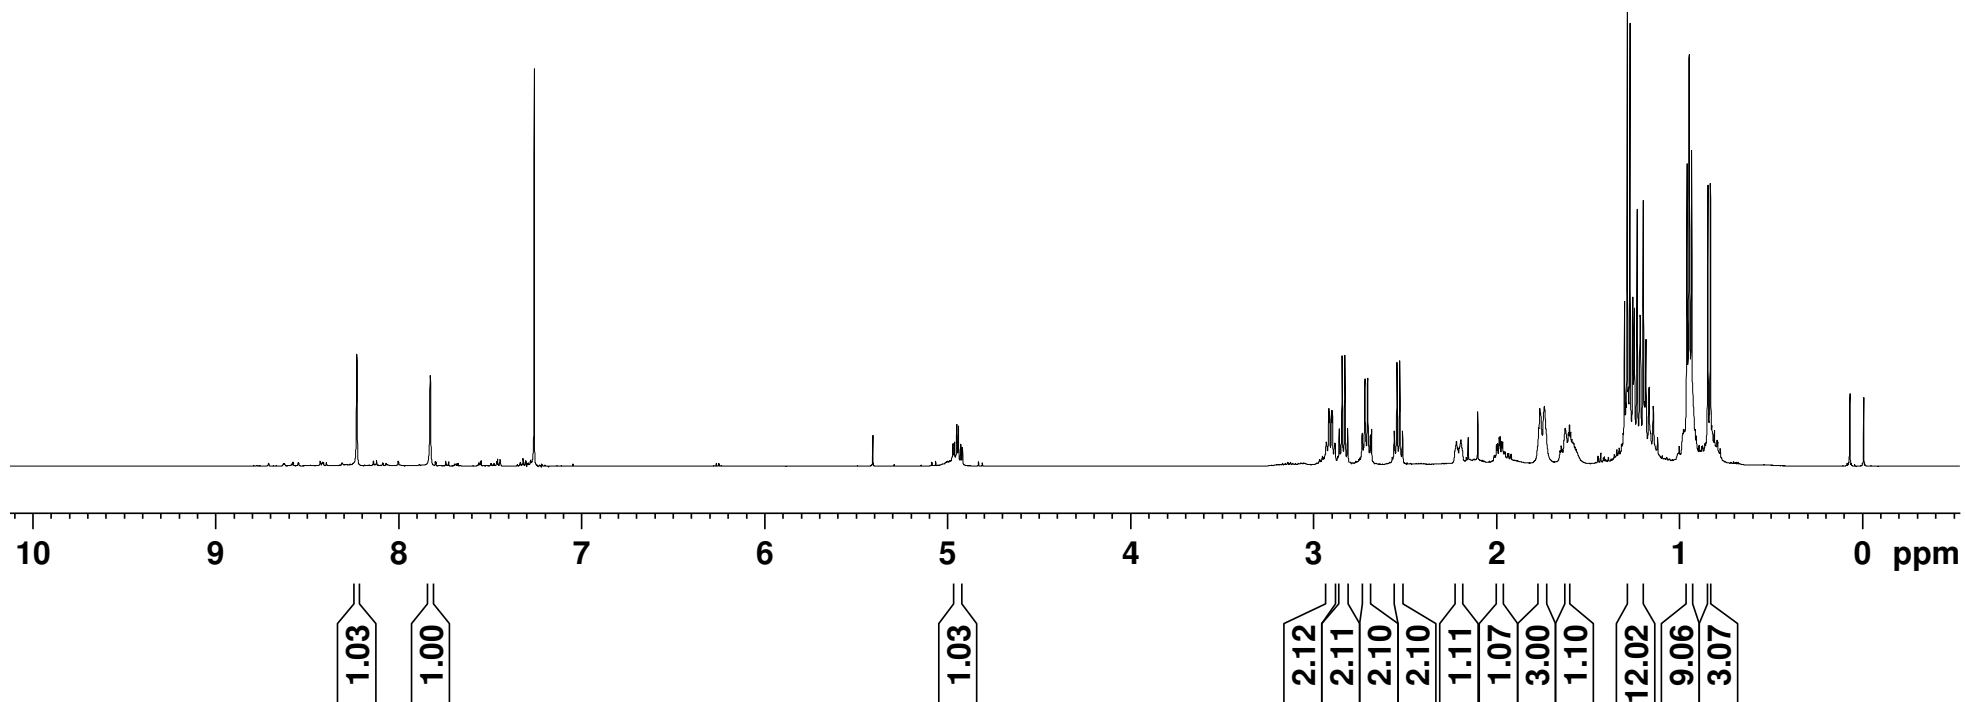

— 166.03  
 — 155.98  
 136.66  
 136.51  
 136.05  
 132.55  
 128.45  
 126.03  
 125.44  
 121.81  
 118.02  
 77.25  
 77.00  
 76.75  
 75.60  
 47.34  
 40.86  
 34.27  
 31.43  
 27.95  
 27.50  
 27.03  
 24.12  
 22.03  
 21.83  
 20.84  
 20.54  
 17.07  
 14.40  
 14.33  
 14.06  
 12.63

AS-405

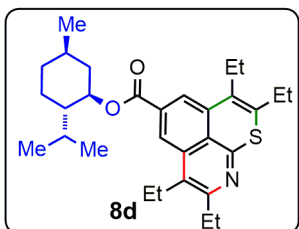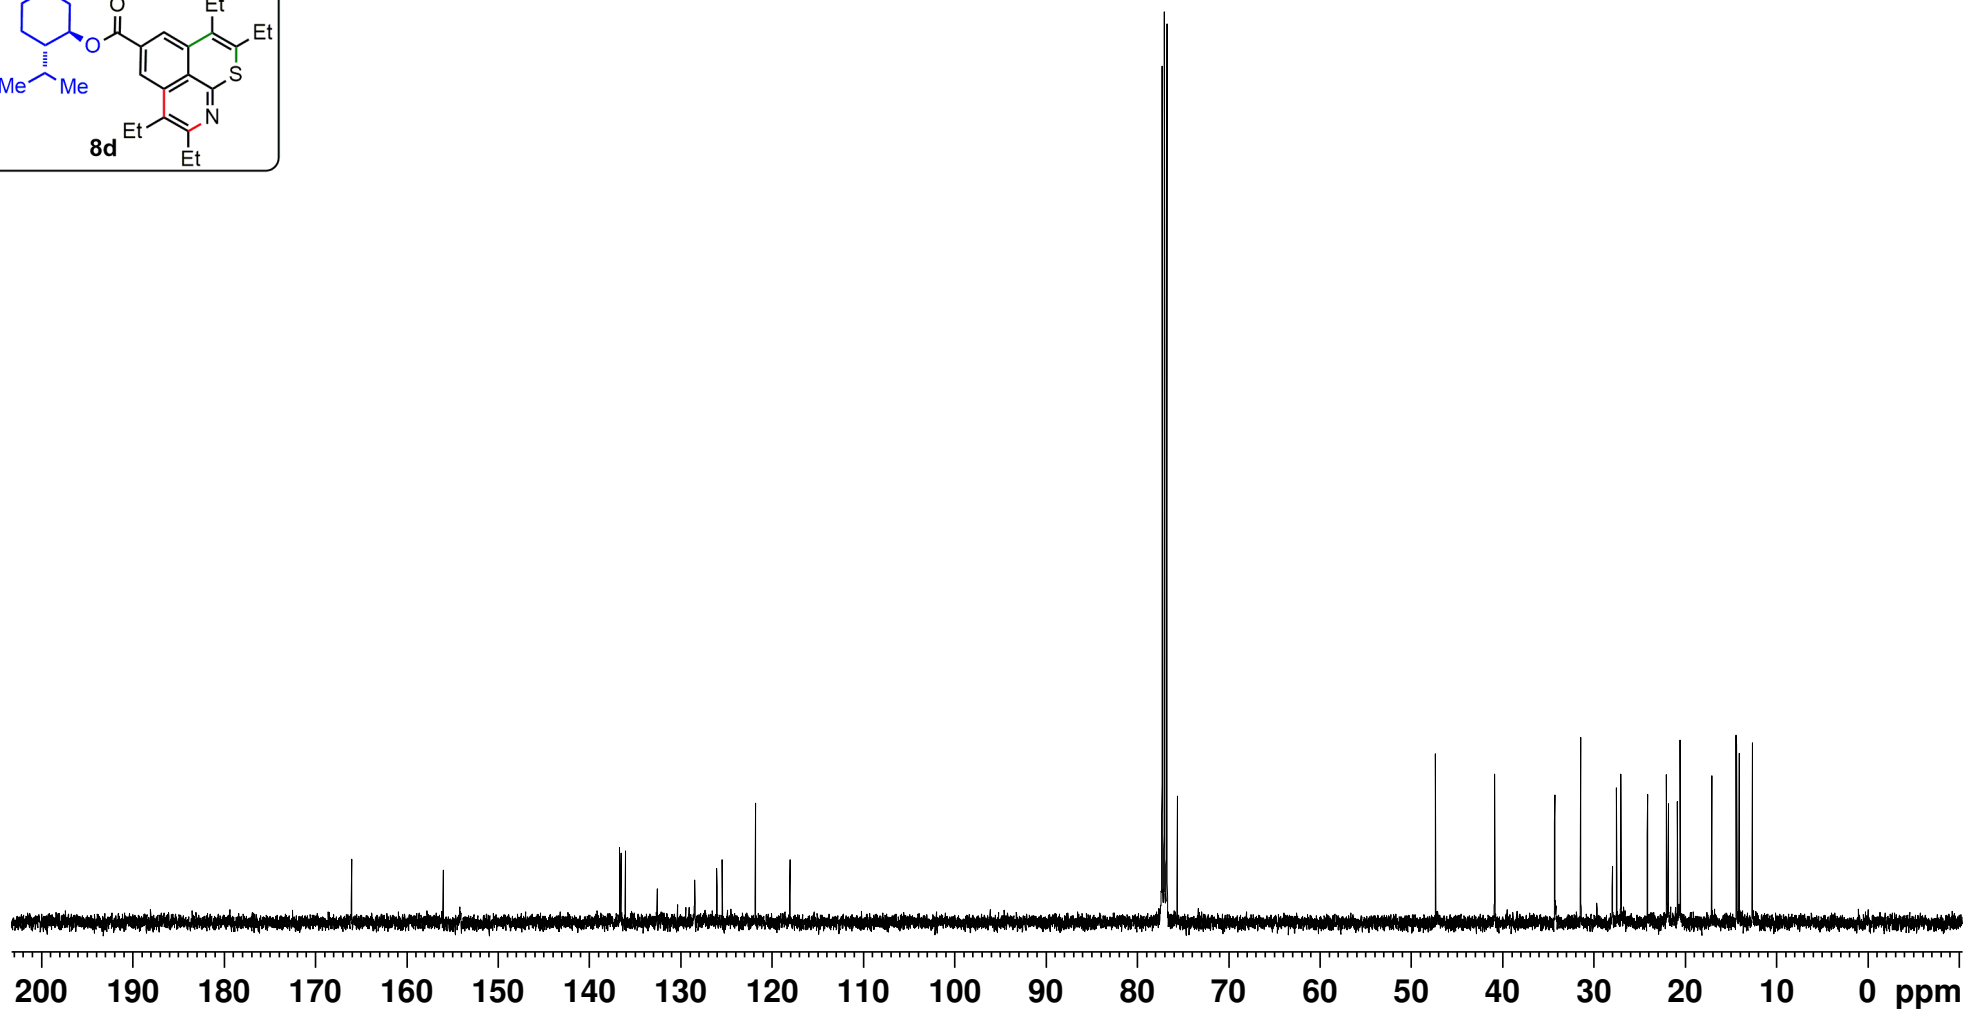

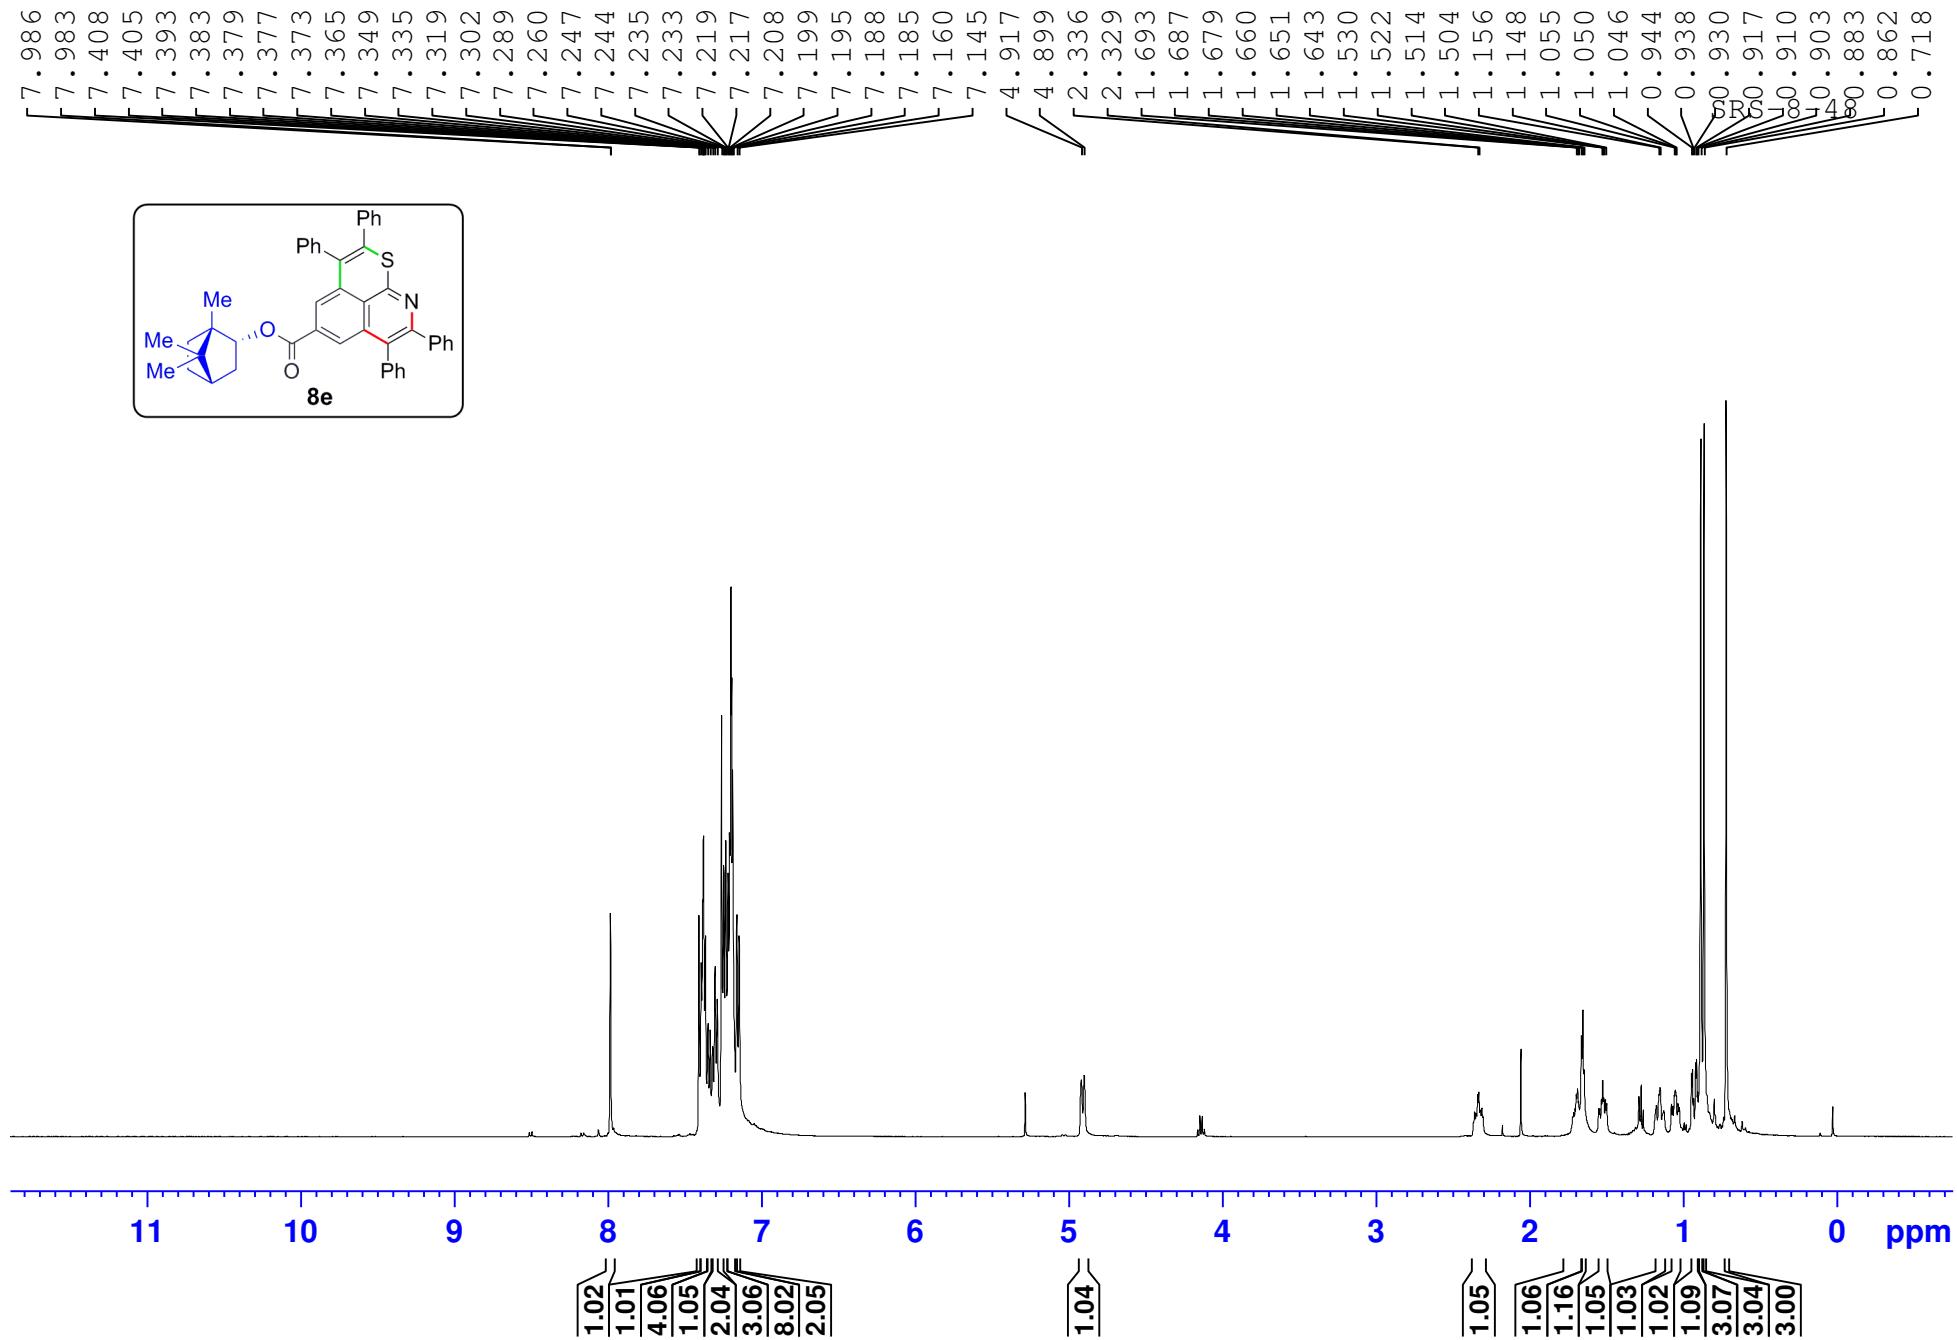

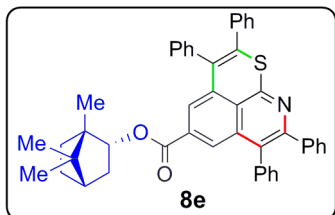

165.87  
158.54  
151.15  
139.70  
137.67  
137.35  
137.21  
137.09  
136.82  
136.77  
132.73  
132.14  
130.98  
130.70  
130.07  
129.44  
128.78  
128.73  
128.17  
128.07  
127.98  
127.57  
127.50  
127.43  
127.40  
125.34  
125.25  
122.71

80.75  
77.25  
77.00  
76.74

48.94  
47.69  
44.90

36.70

27.77  
27.03

19.57  
18.78

13.31

SRS-8-48

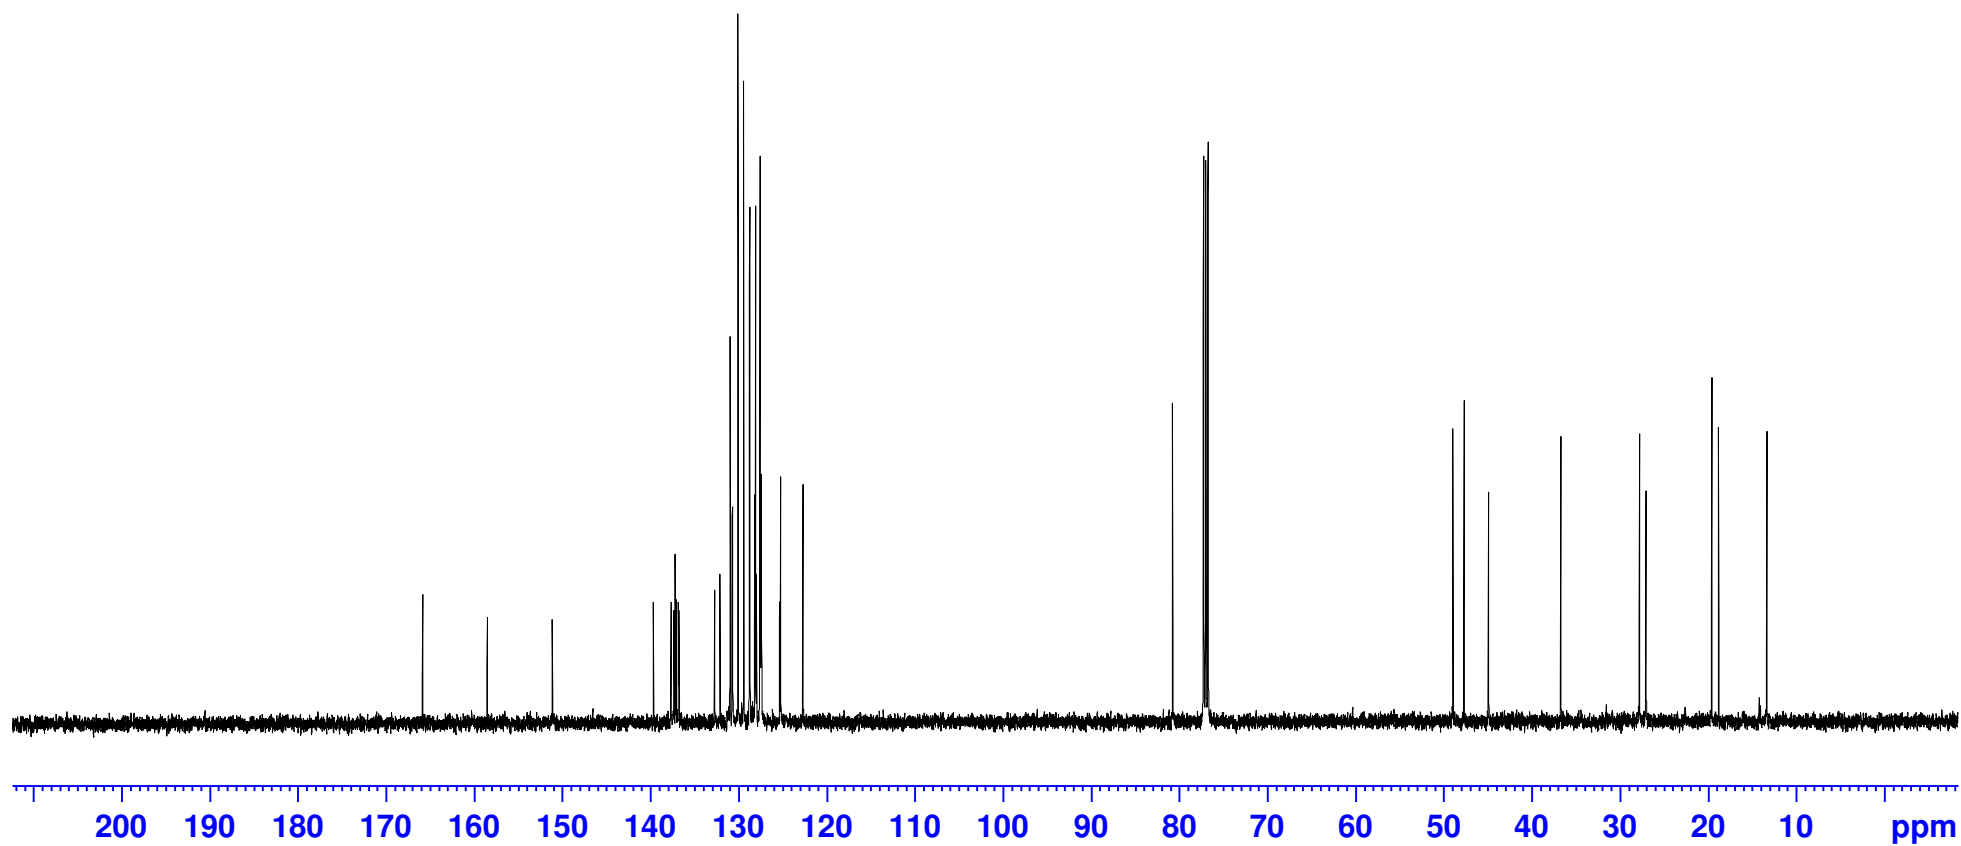

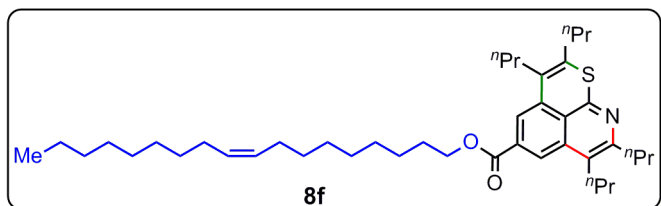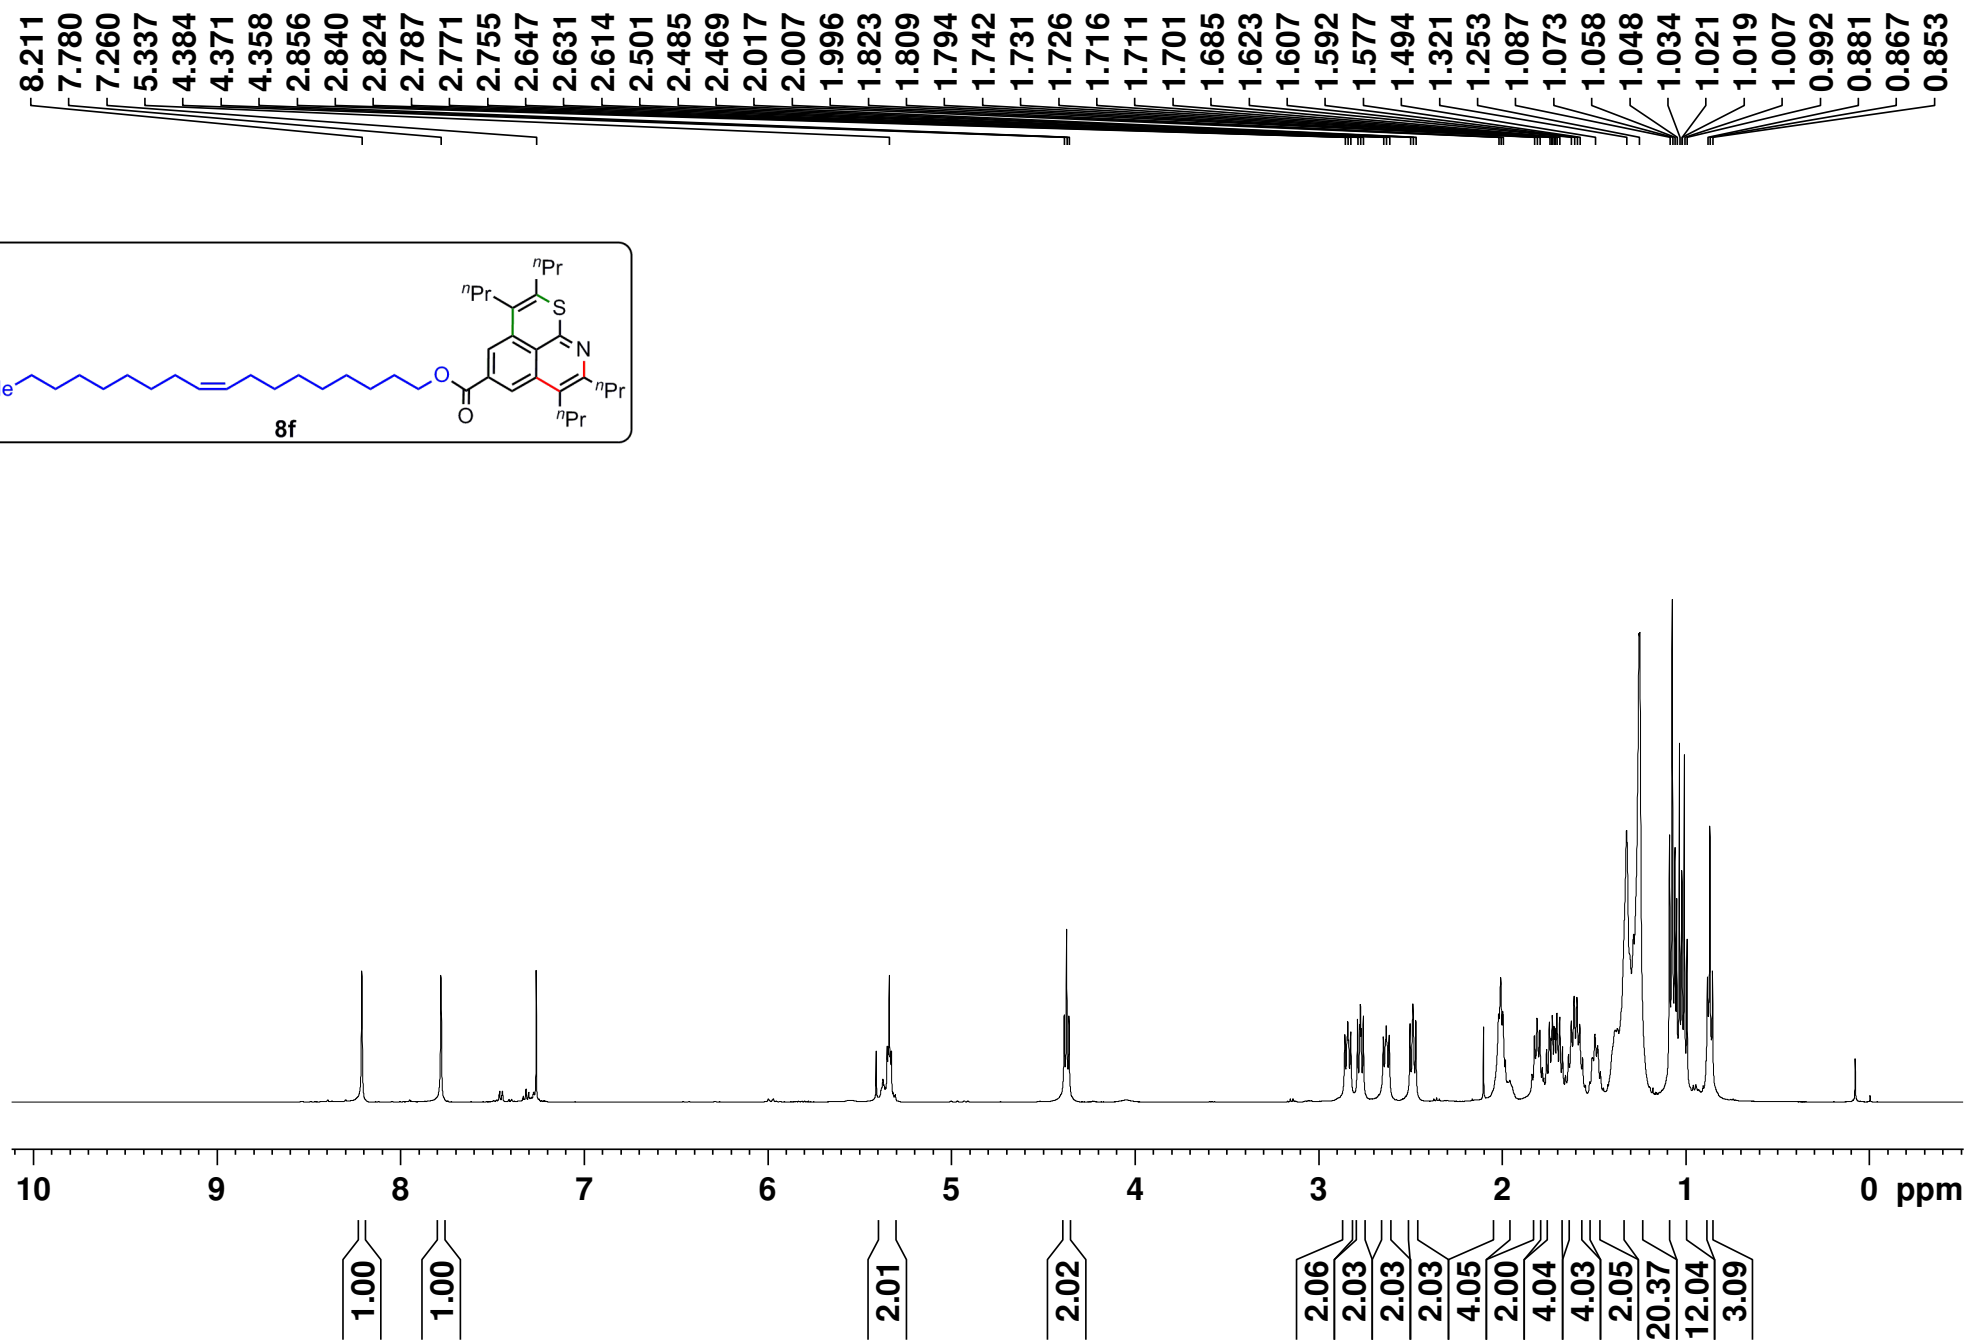

AS- 509

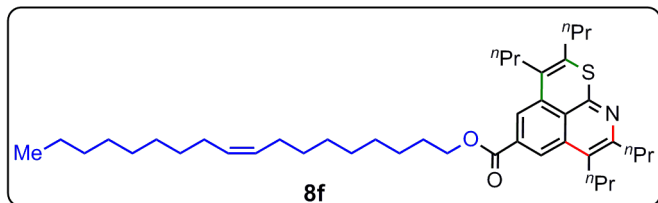

166.59  
155.86  
153.51  
136.82  
136.24  
135.52  
131.89  
129.95  
129.69  
129.06  
127.41  
125.34  
124.86  
122.04  
117.97

77.25  
77.00  
76.74  
65.40  
36.95  
36.18  
31.86  
30.99  
29.85  
29.72  
29.48  
29.47  
29.28  
29.21  
28.68  
27.18  
27.14  
26.12  
23.27  
23.06  
23.00  
22.64  
21.22  
14.42  
14.28  
14.23

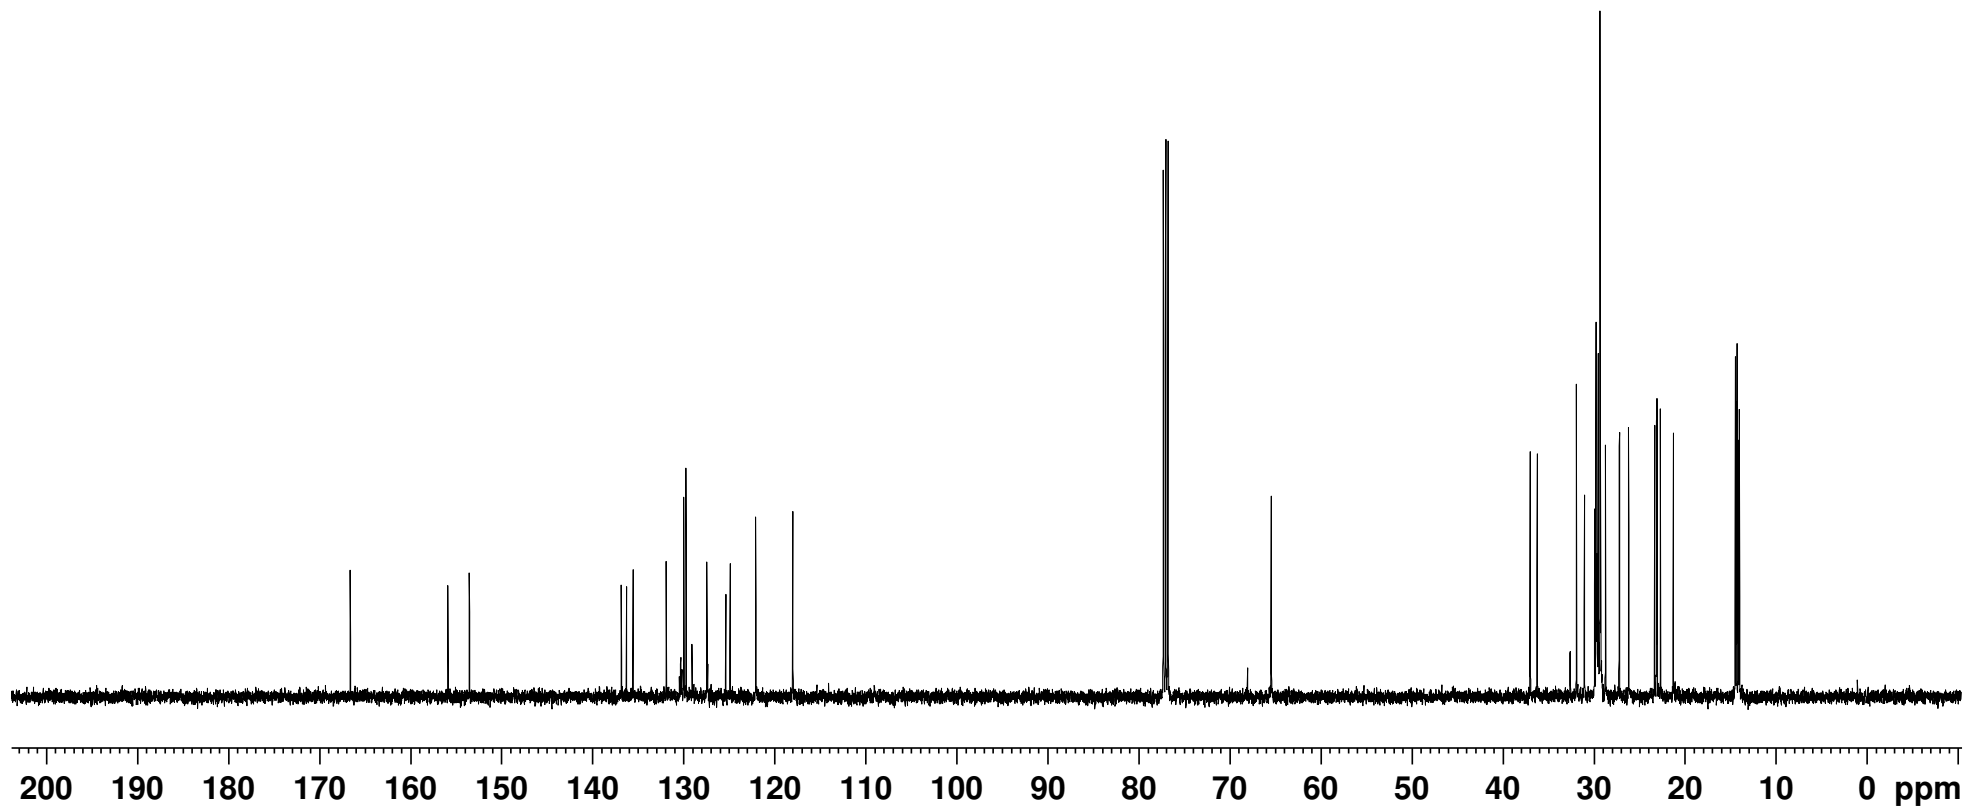

8.196  
8.193  
7.606  
7.603  
7.387  
7.377  
7.373  
7.368  
7.362  
7.341  
7.327  
7.302  
7.287  
7.260  
7.249  
7.241  
7.238  
7.221  
7.213  
7.208  
7.198  
7.194  
7.182  
7.179  
7.165  
2.583  
2.570  
2.556  
2.086  
1.914  
1.870  
1.831  
1.818  
1.804  
1.763  
1.750  
1.582  
1.569  
1.556  
1.542  
1.416  
1.407  
1.398  
1.284  
1.248  
1.176  
1.163  
1.109  
1.104  
1.100  
1.094  
0.905  
0.892  
0.882  
0.874  
0.869

Majji-MJ-17-I55

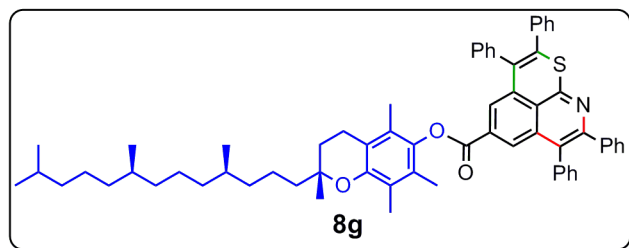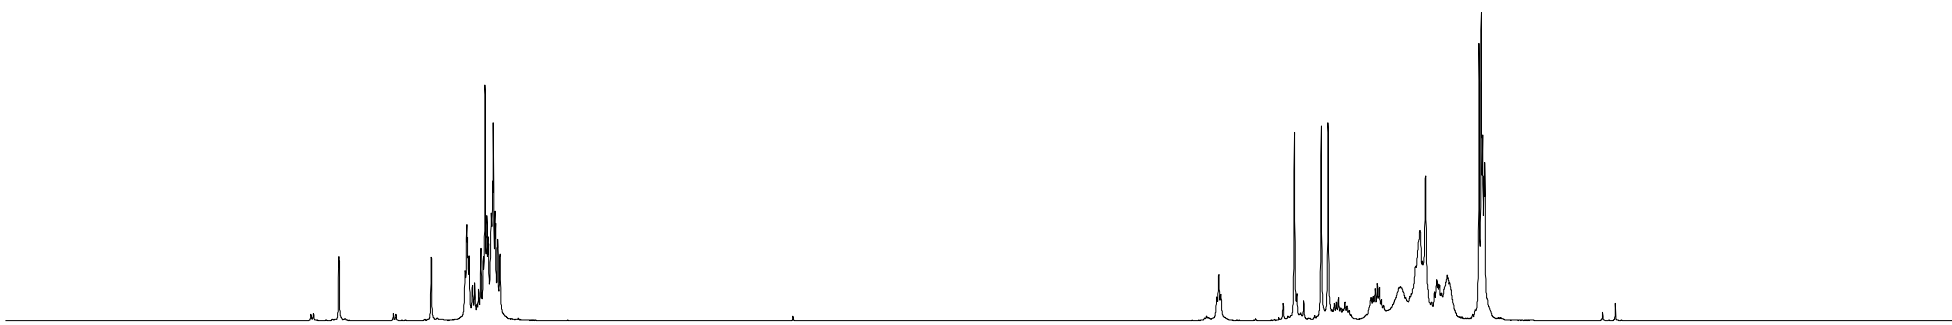

10 9 8 7 6 5 4 3 2 1 0 -1 ppm

1.00  
1.02  
20.24

2.02  
2.99  
2.76  
3.06  
2.11  
17.31  
7.21  
12.22

164.54  
158.61  
151.49  
149.42  
140.60  
139.71  
137.76  
137.50  
137.16  
137.13  
137.12  
136.68  
132.39  
132.11  
131.76  
130.98  
130.71  
130.07  
129.41  
128.78  
128.18  
128.09  
127.99  
127.68  
127.60  
127.57  
127.47  
126.73  
125.77  
125.65  
124.95  
123.05  
122.90  
117.37

77.25  
77.00  
76.74  
75.08

39.37  
37.54  
37.52  
37.44  
37.38  
37.33  
37.28  
32.77  
32.76  
32.70  
32.68  
31.10  
31.06  
27.95  
24.78  
24.77  
24.41  
22.69  
22.60  
21.02  
20.55  
19.74  
19.67  
19.62  
19.60  
19.56  
12.89  
12.07

Majji-MJ-17-I5

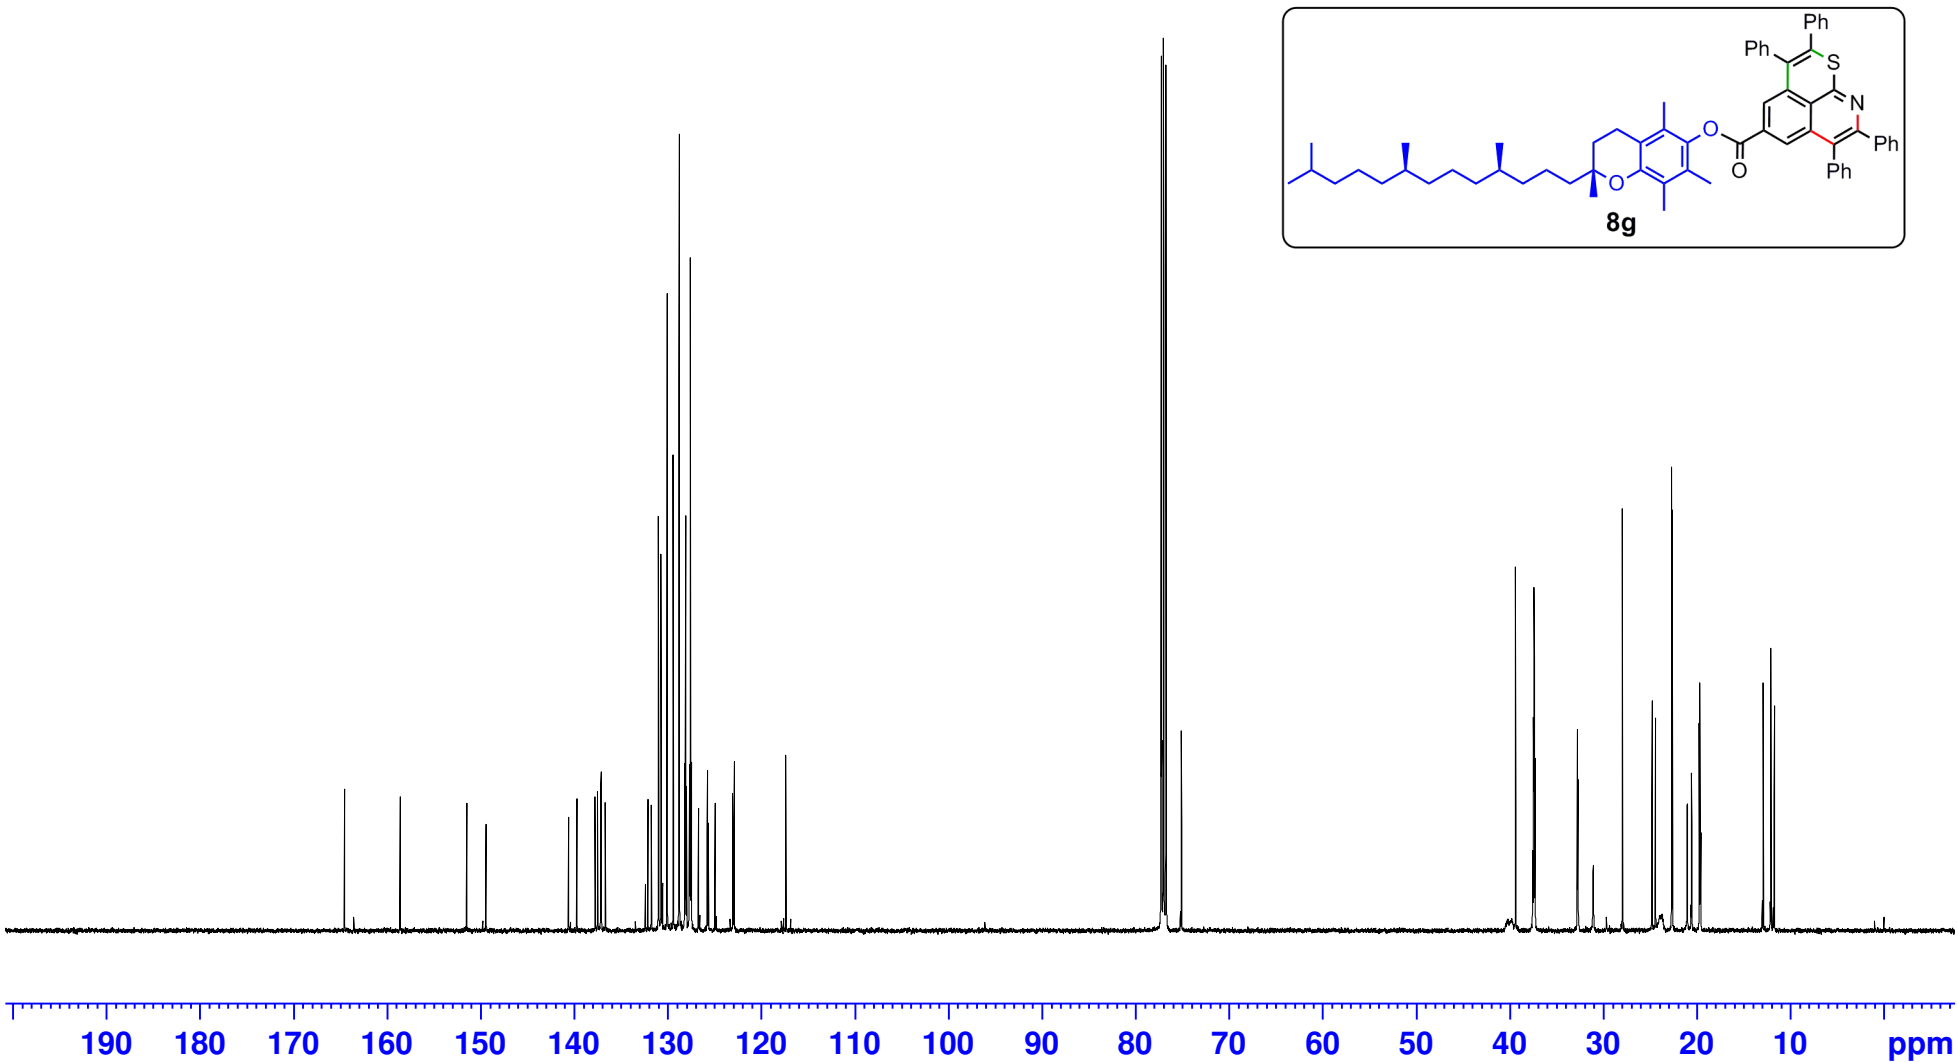



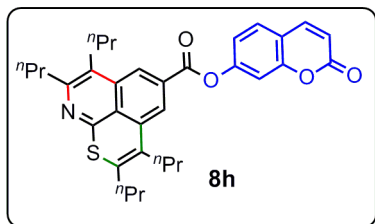

8.353  
8.351  
7.861  
7.858  
7.751  
7.727  
7.582  
7.561  
7.311  
7.306  
7.240  
7.234  
6.447  
6.423

2.893  
2.873  
2.853  
2.814  
2.795  
2.775  
2.676  
2.656  
2.636  
2.531  
2.511  
2.491  
1.779  
1.760  
1.740  
1.720  
1.699  
1.688  
1.652  
1.633  
1.614  
1.595  
1.576  
1.094  
1.090  
1.076  
1.072  
1.065  
1.057  
1.047  
1.037  
1.029

SRS-8-10

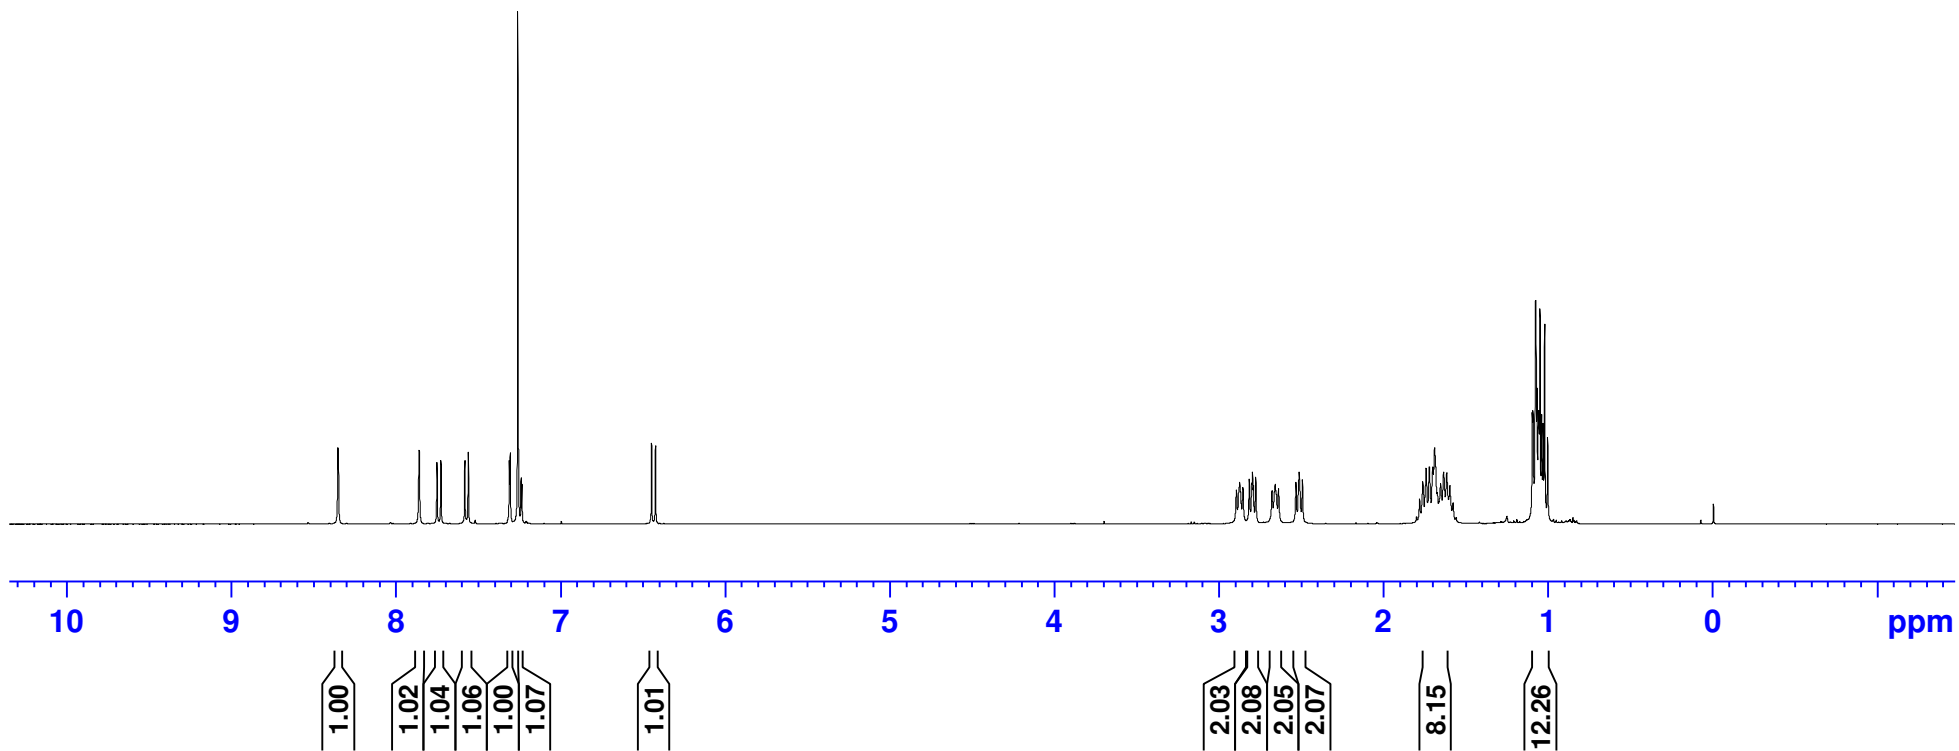

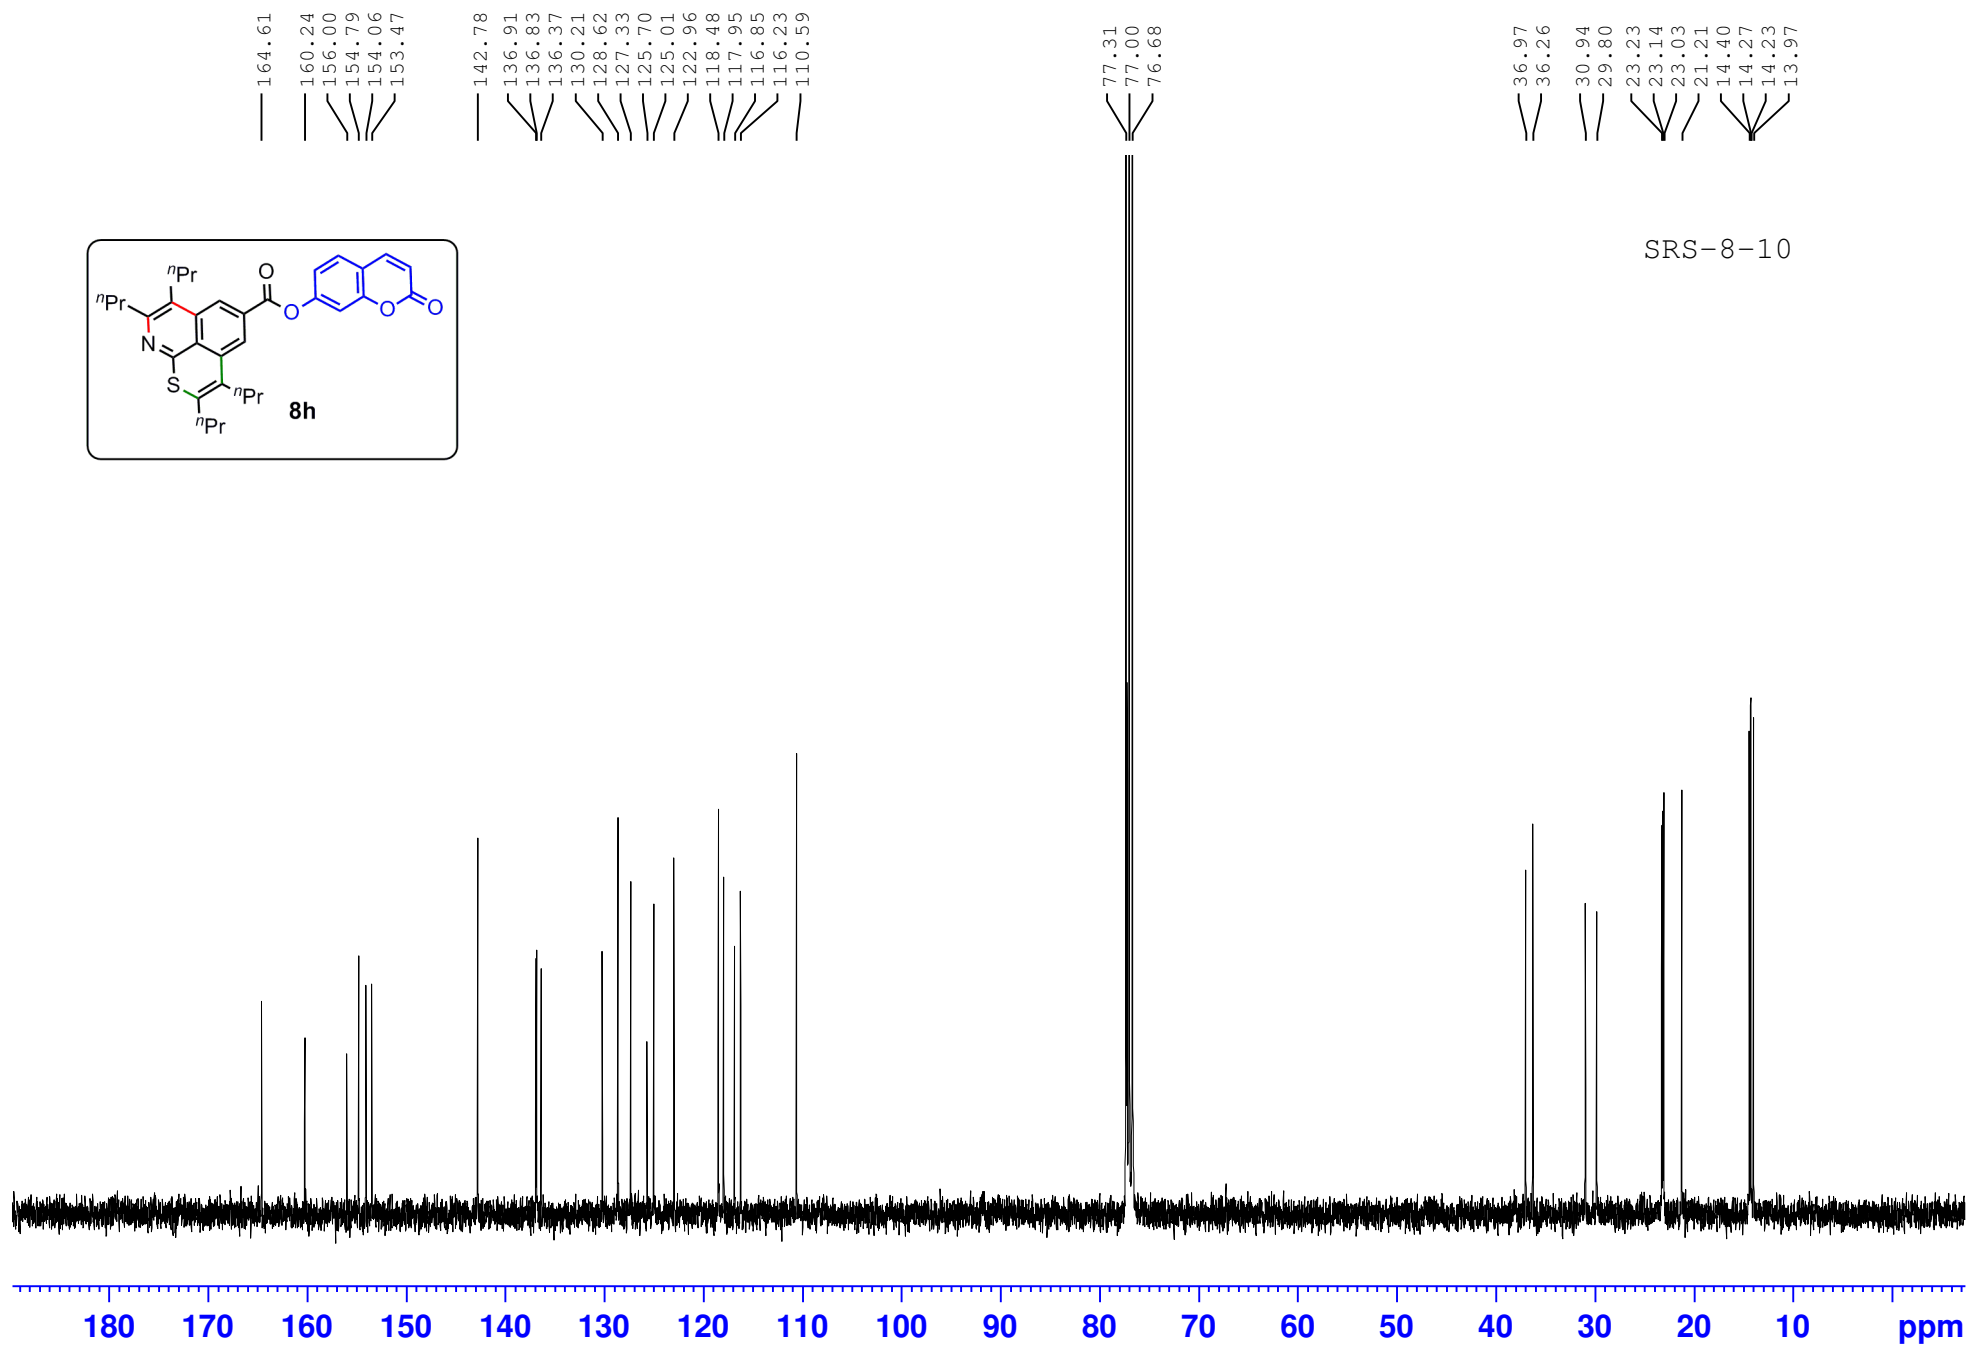

SRS-8-10

8.208  
7.801  
7.260  
5.436  
2.915  
2.900  
2.836  
2.821  
2.713  
2.698  
2.683  
2.551  
2.536  
2.521  
2.506  
2.040  
2.003  
1.754  
1.567  
1.531  
1.517  
1.504  
1.480  
1.460  
1.361  
1.346  
1.331  
1.300  
1.285  
1.269  
1.253  
1.237  
1.222  
1.200  
1.185  
1.139  
1.118  
1.100  
1.086  
1.062  
1.025  
1.011  
0.997  
0.986  
0.924  
0.911  
0.874  
0.870  
0.861  
0.857  
0.683

AS-414

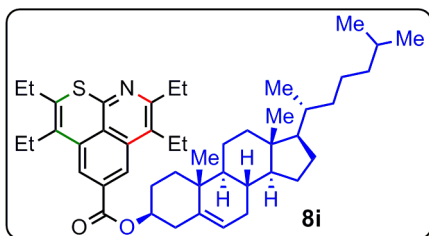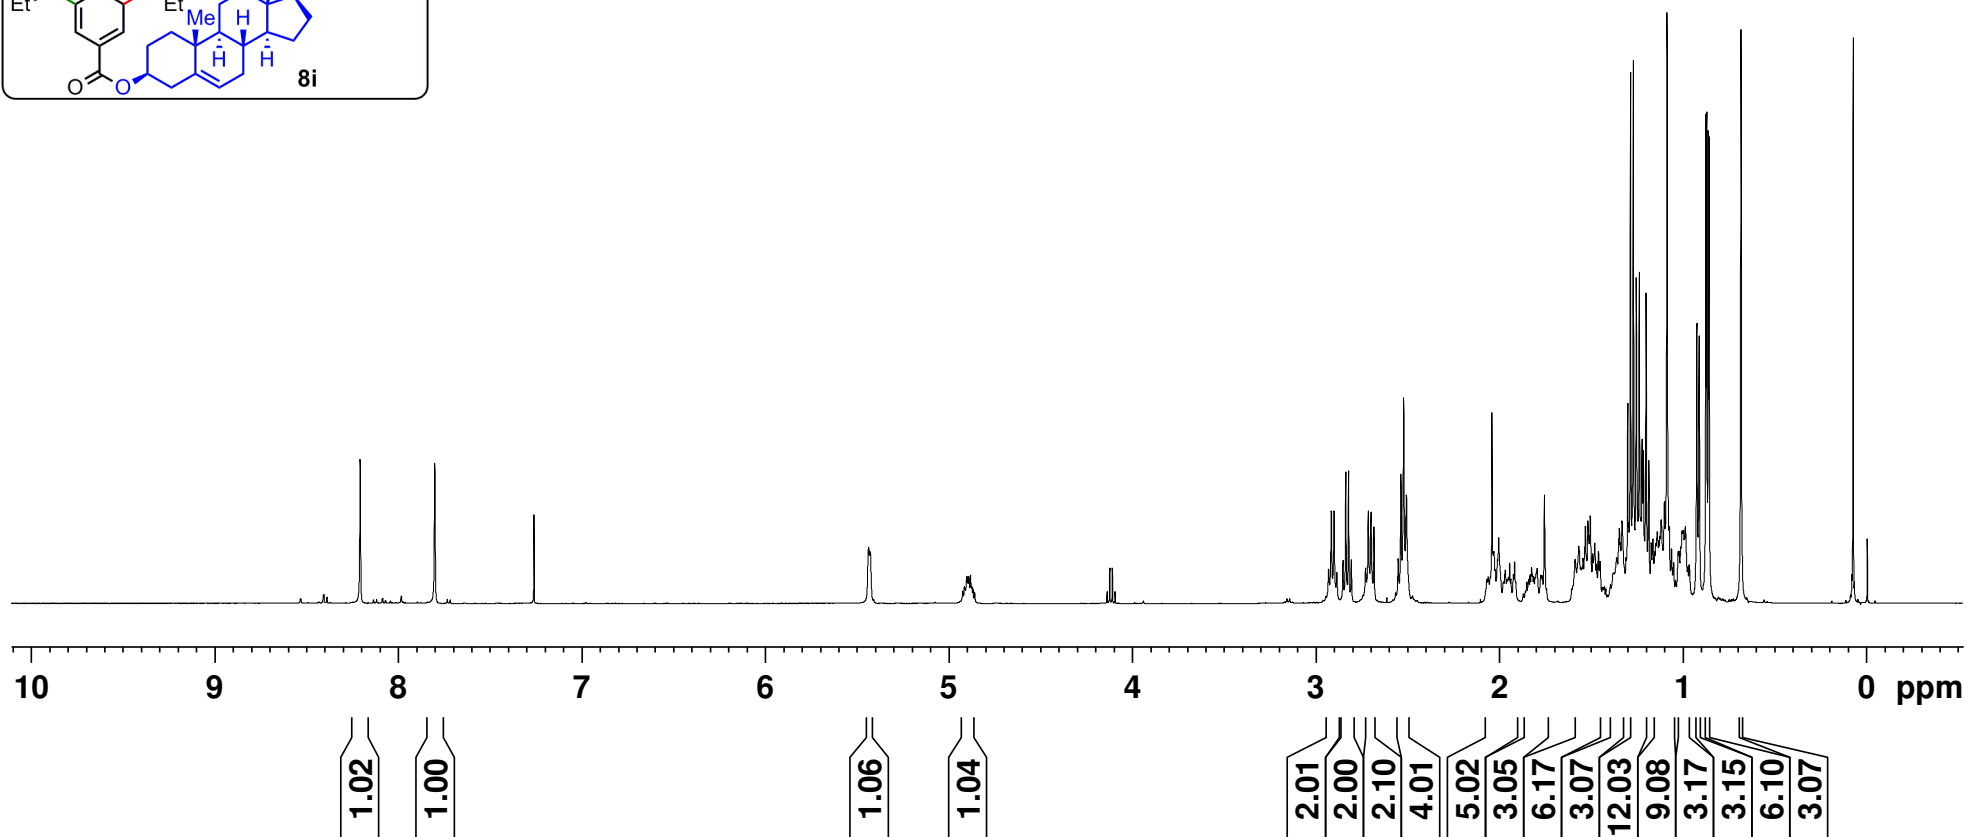

166.01  
155.94  
154.38  
139.53  
136.59  
136.48  
135.97  
132.39  
128.36  
125.93  
125.47  
122.88  
121.72  
117.89

77.25  
77.00  
76.75  
75.20  
56.65  
56.10  
49.99  
42.28  
39.69  
39.48  
38.18  
37.00  
36.64  
36.15  
35.77  
31.91  
31.83  
28.21  
28.06  
27.99  
27.86  
27.48  
24.26  
23.82  
22.80  
22.54  
21.79  
21.02

AS-414

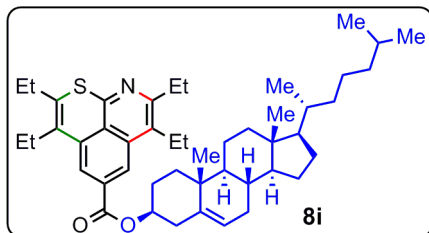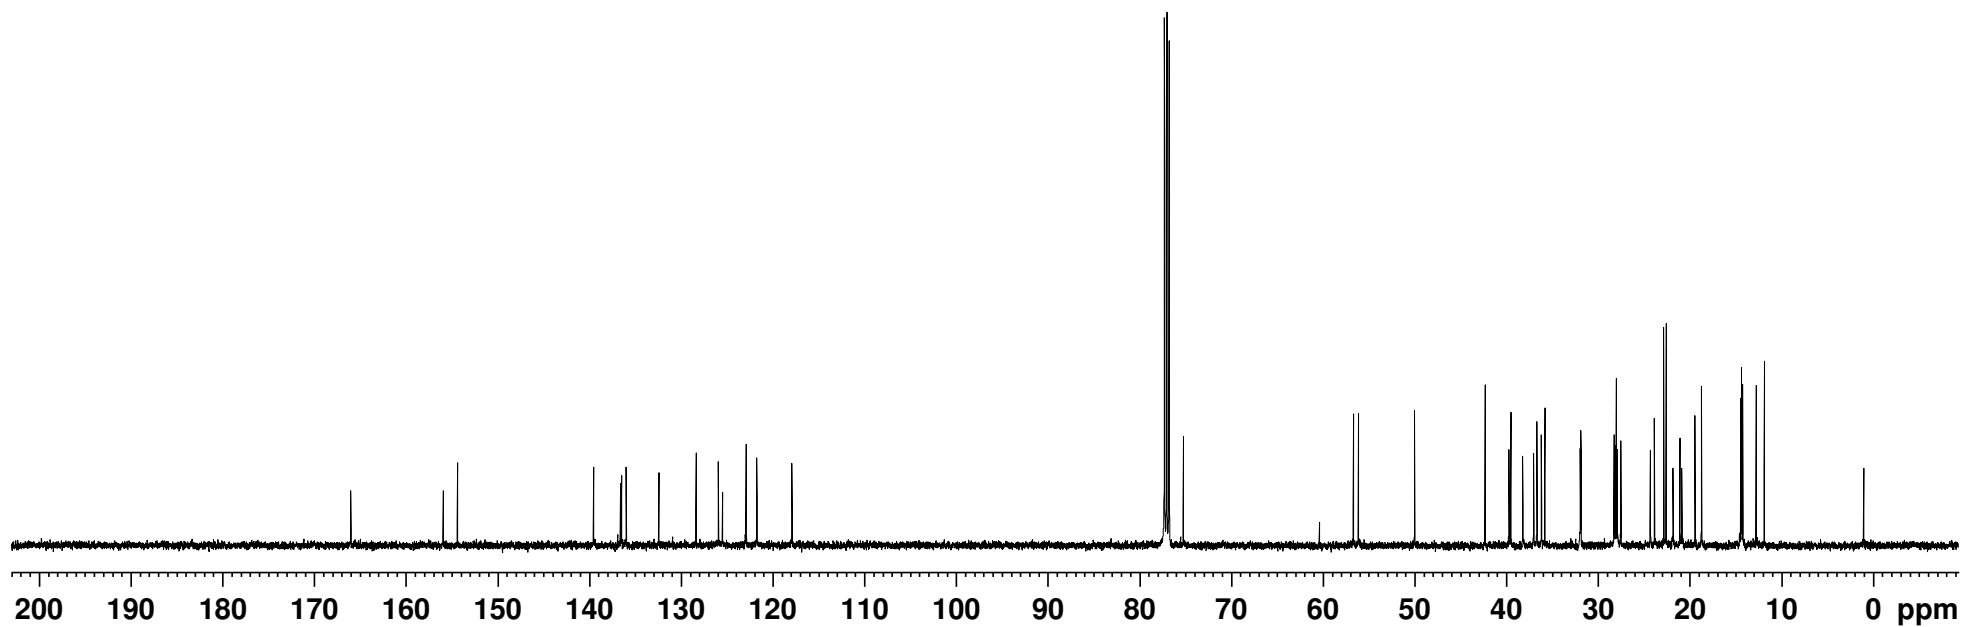

8.104  
8.101  
7.511  
7.508  
7.379  
7.376  
7.362  
7.348  
7.341  
7.336  
7.326  
7.311  
7.289  
7.274  
7.260  
7.238  
7.235  
7.222  
7.219  
7.214  
7.196  
7.189  
7.185  
7.179  
7.155  
7.152  
7.138  
6.821  
6.804  
6.800  
2.867  
2.857  
2.847  
2.489  
2.472  
2.394  
2.377  
2.169  
2.157  
2.139  
2.119  
2.046  
2.034  
2.018  
2.003  
1.972  
1.948  
1.616  
1.591  
1.568  
1.529  
1.518  
1.496  
1.481  
1.473  
1.422  
0.901

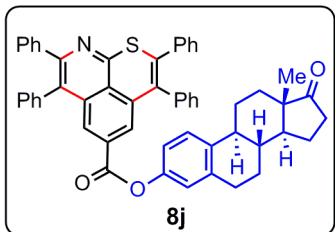

SRS-8-88-N

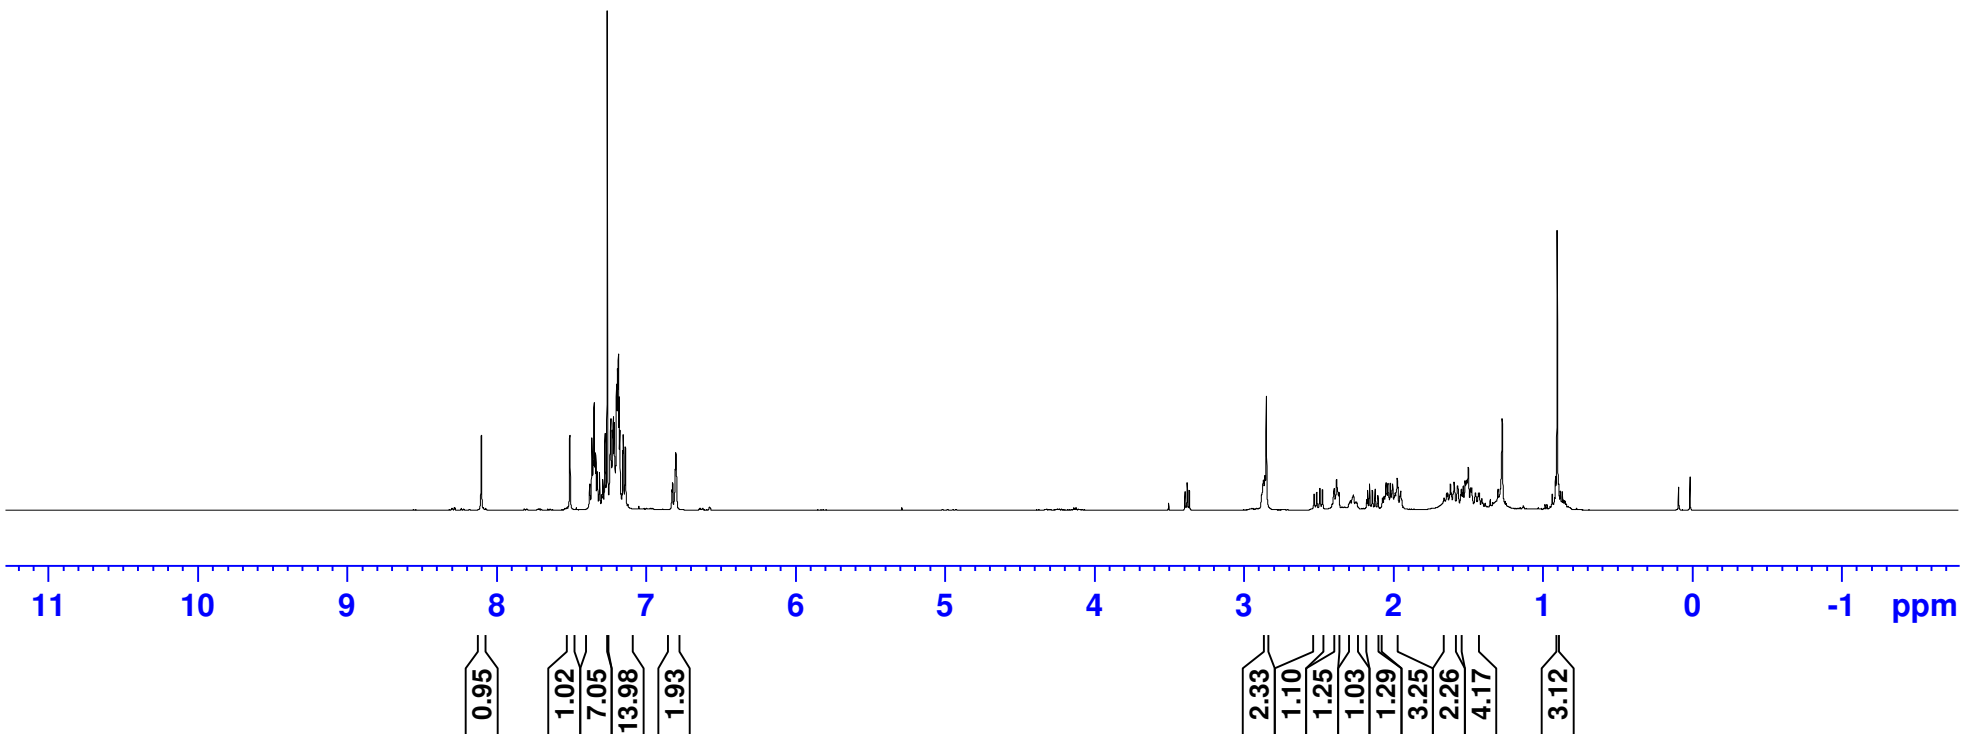

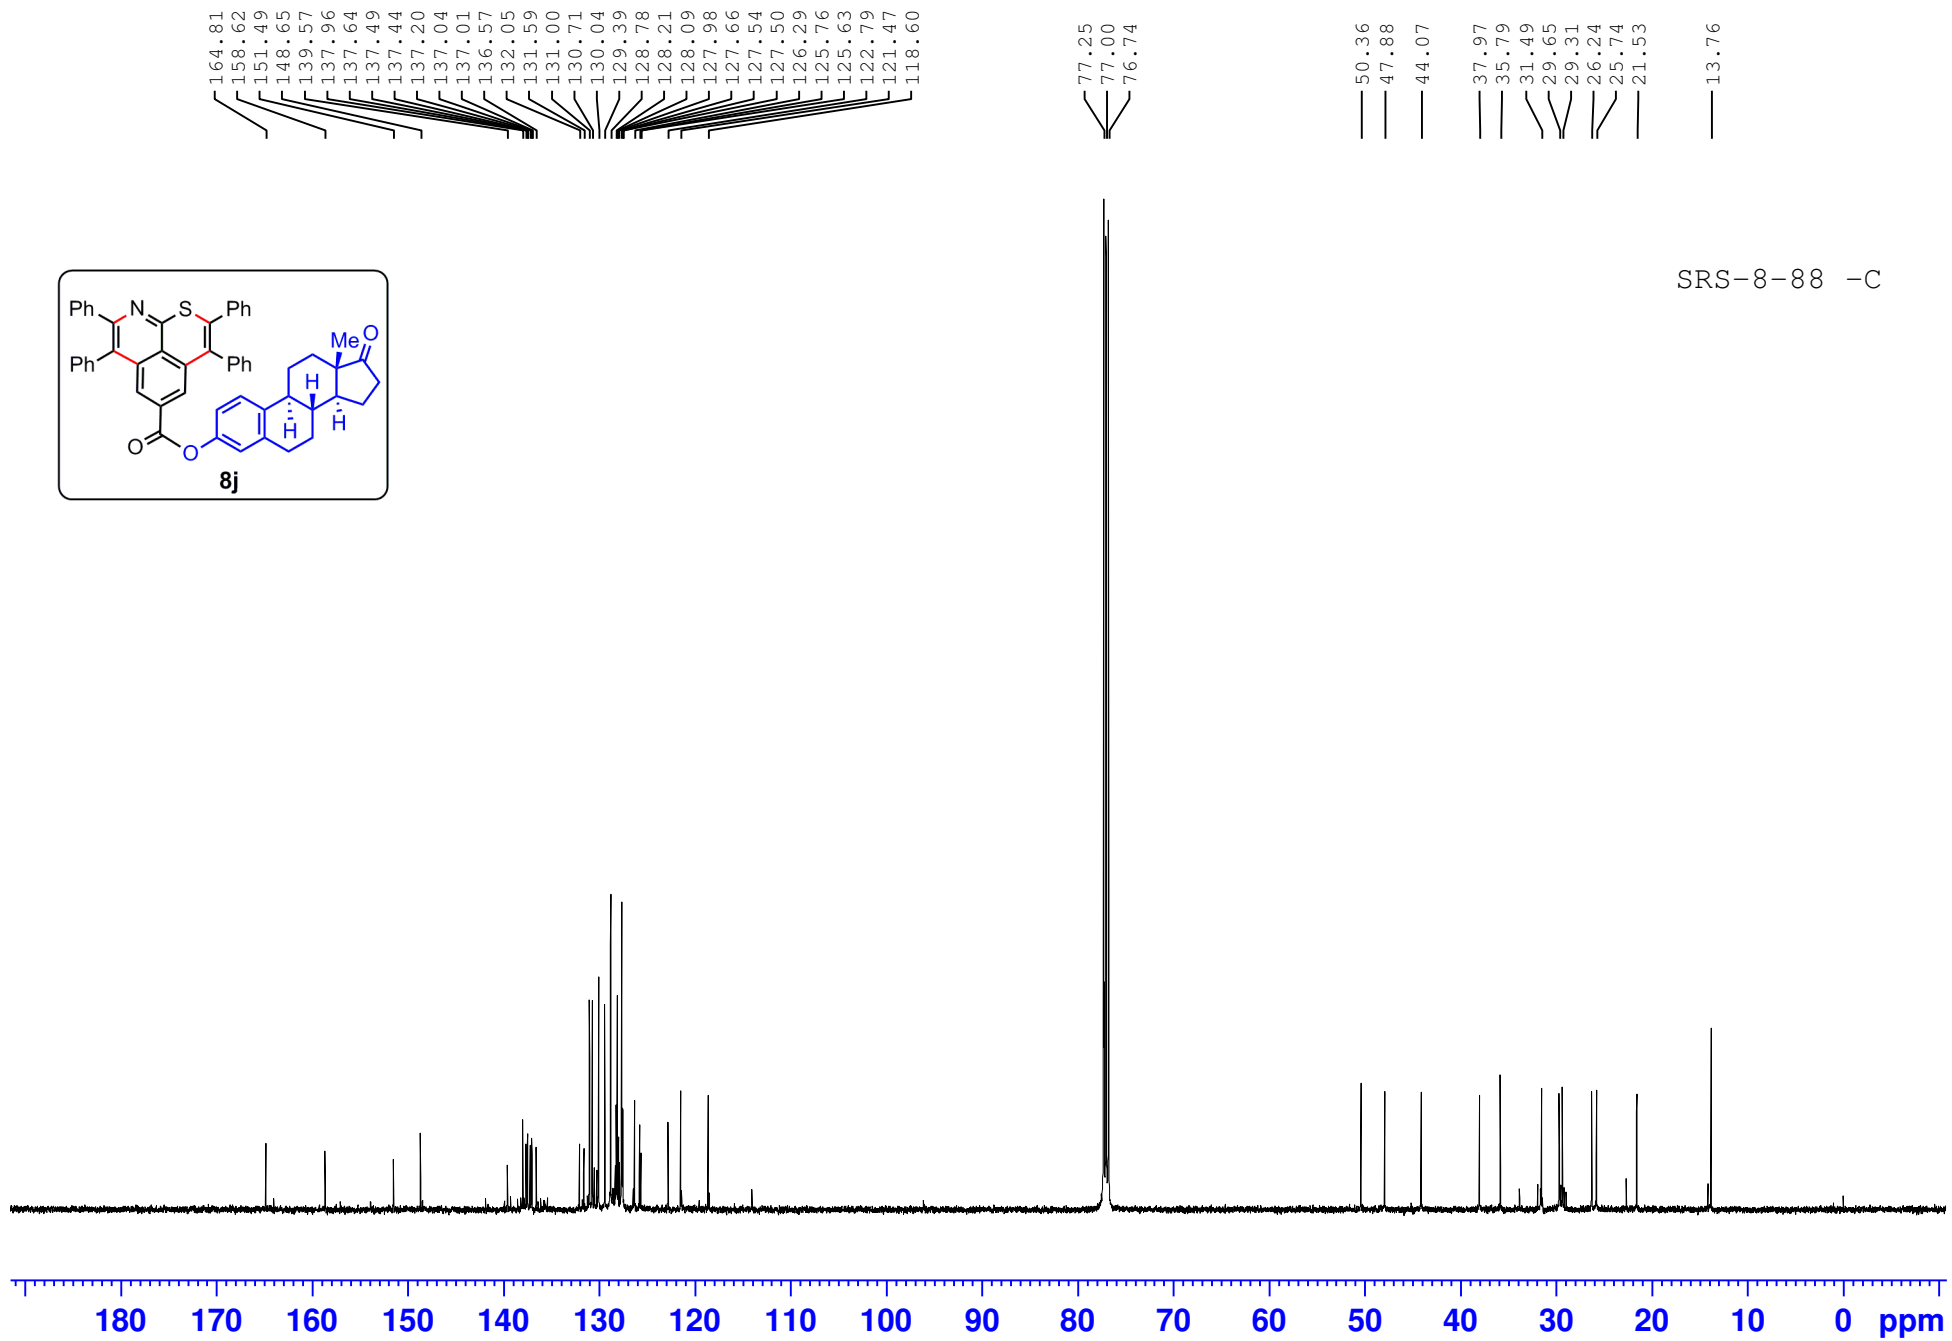

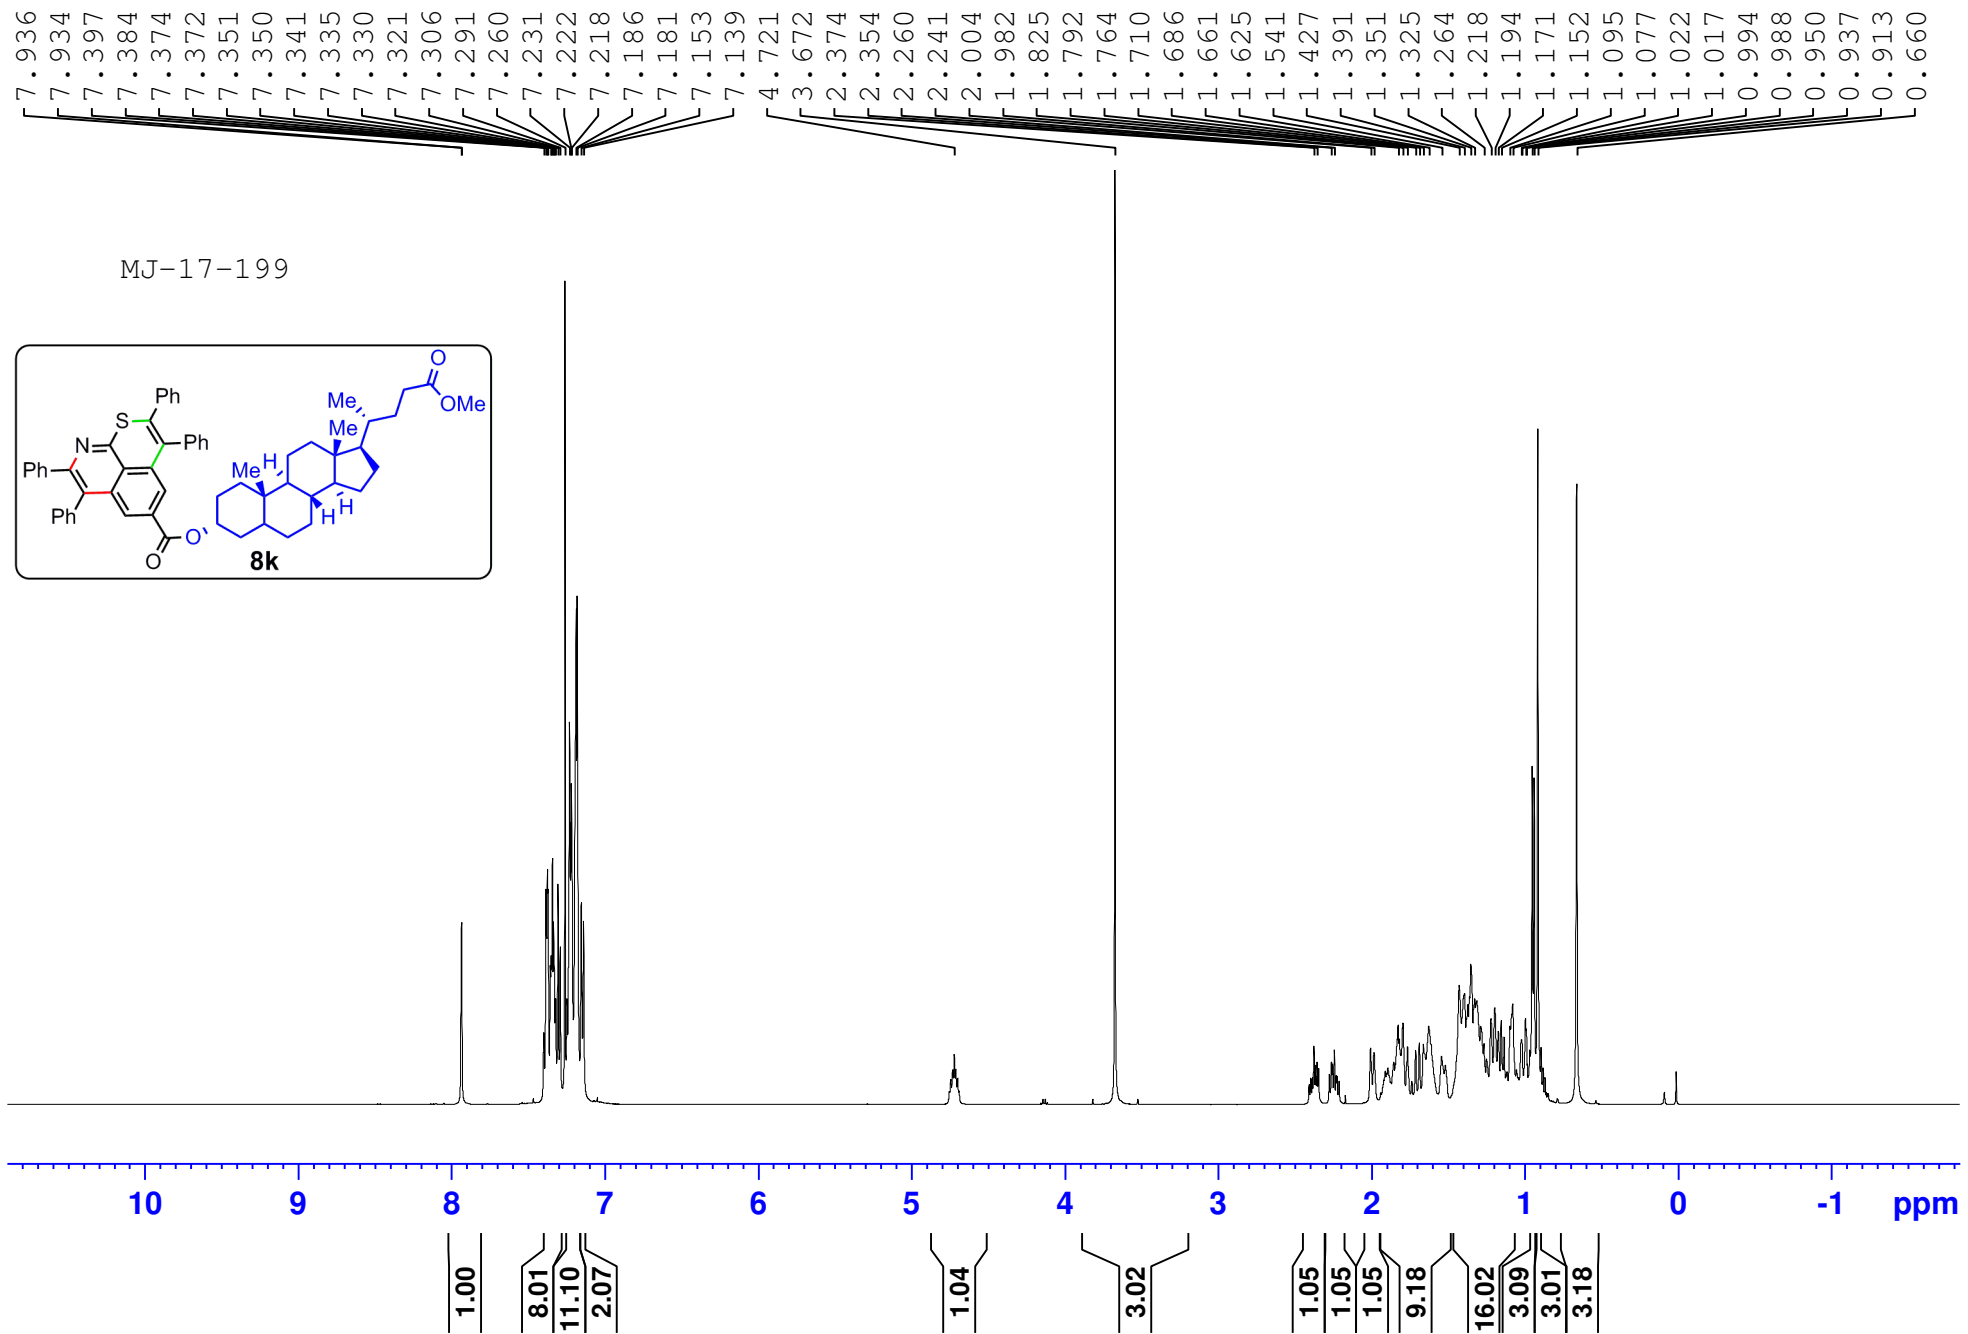

MJ-17-199

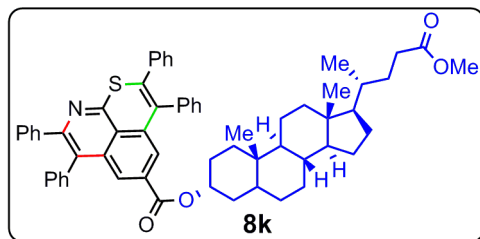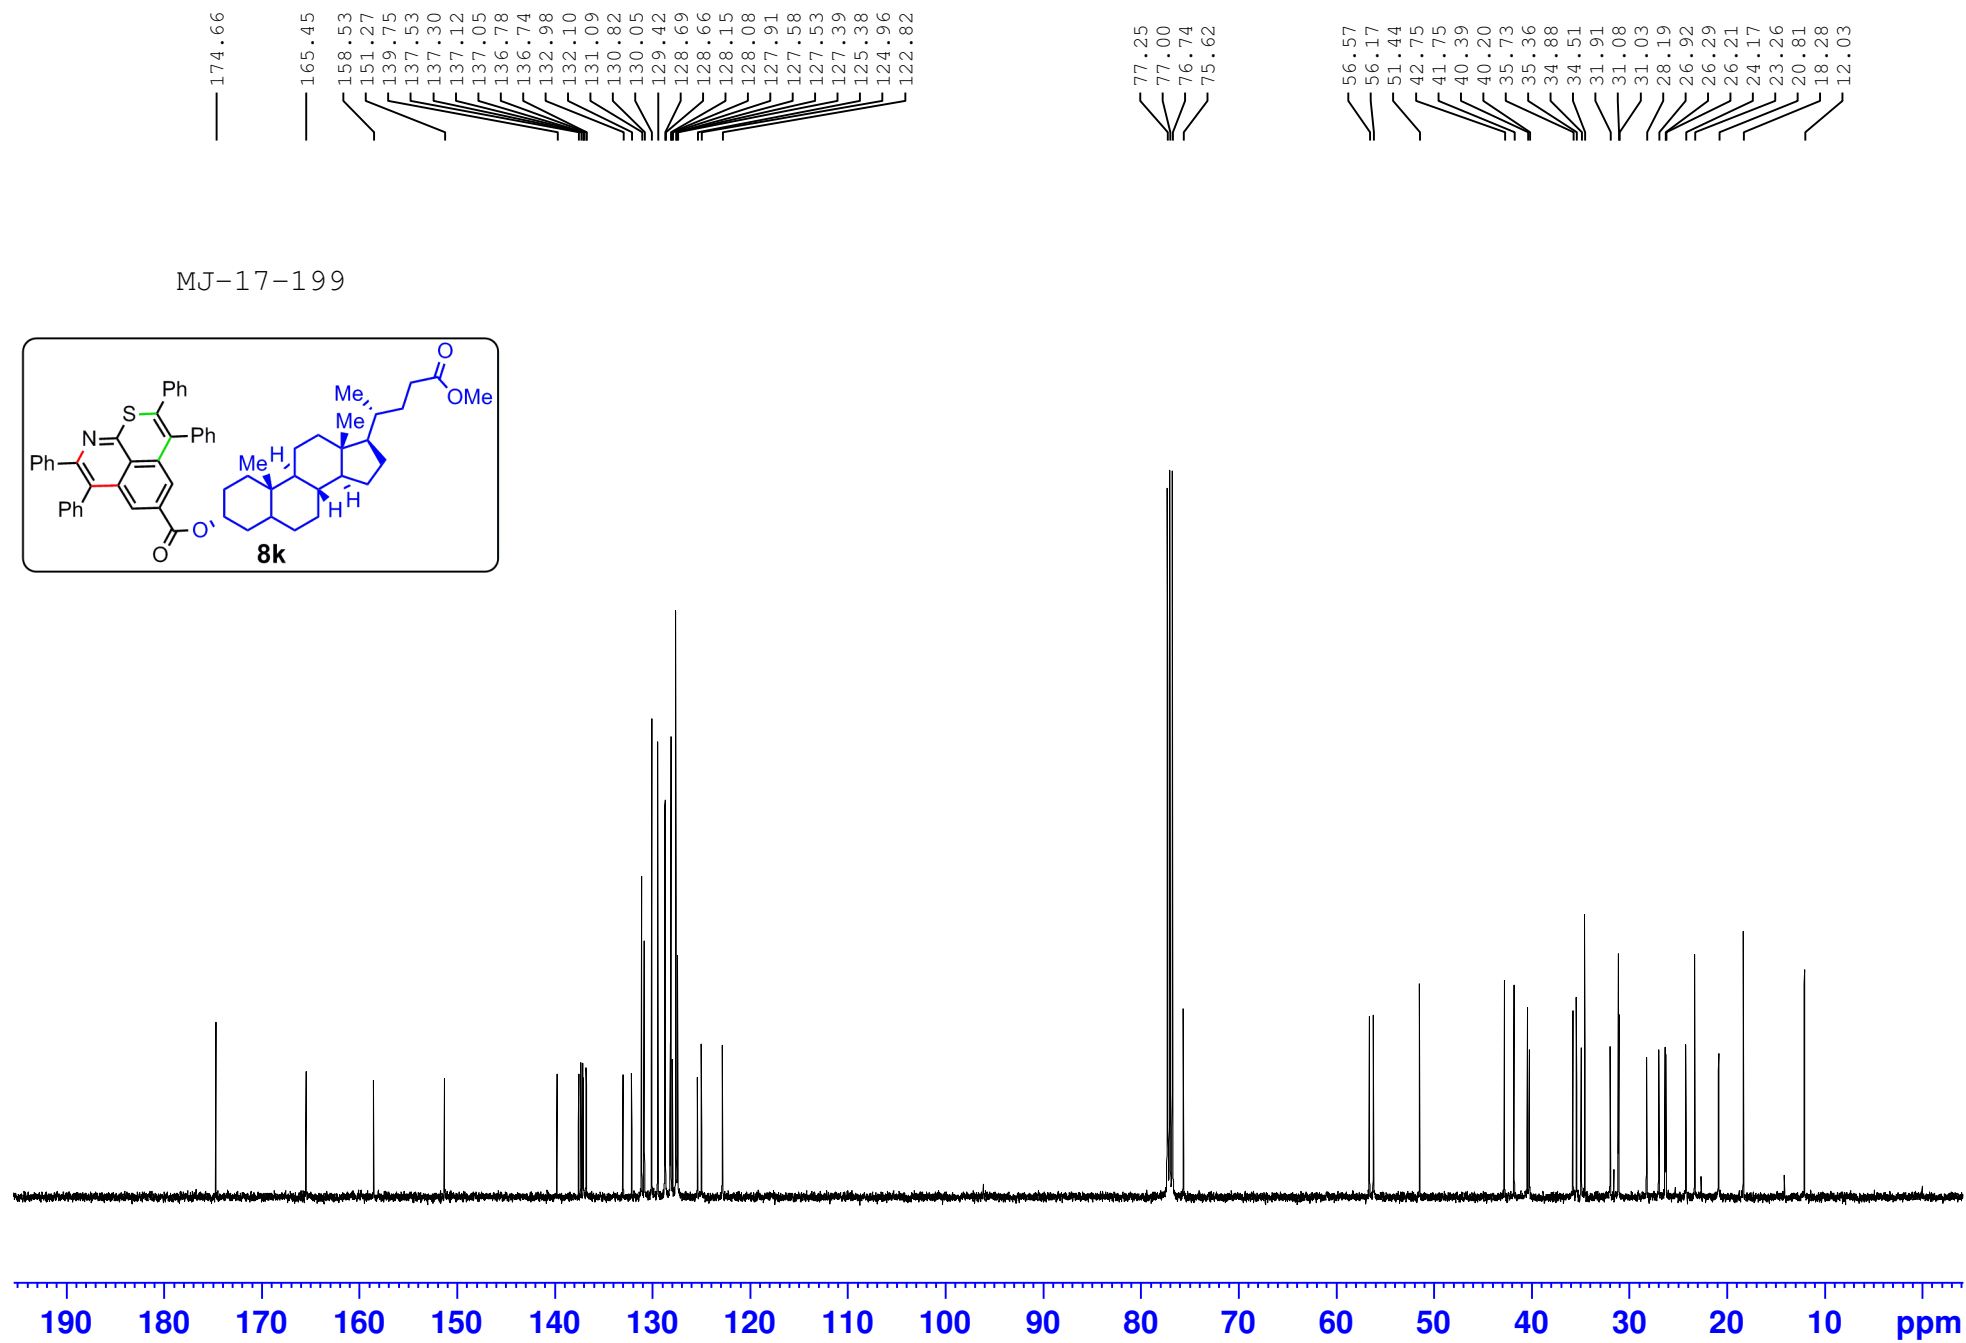



7.675  
7.392  
7.388  
7.375  
7.360  
7.332  
7.313  
7.297  
7.282  
7.249  
7.234  
7.200  
7.196  
7.189  
7.188  
7.172  
7.119  
7.103  
7.048

2.864  
2.849  
2.833

1.396  
1.381  
1.366  
1.351  
0.773  
0.759  
0.744

MJ-17-98 R

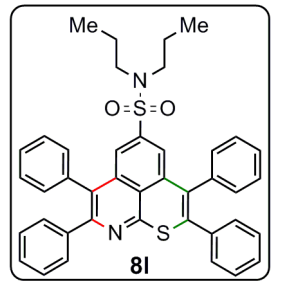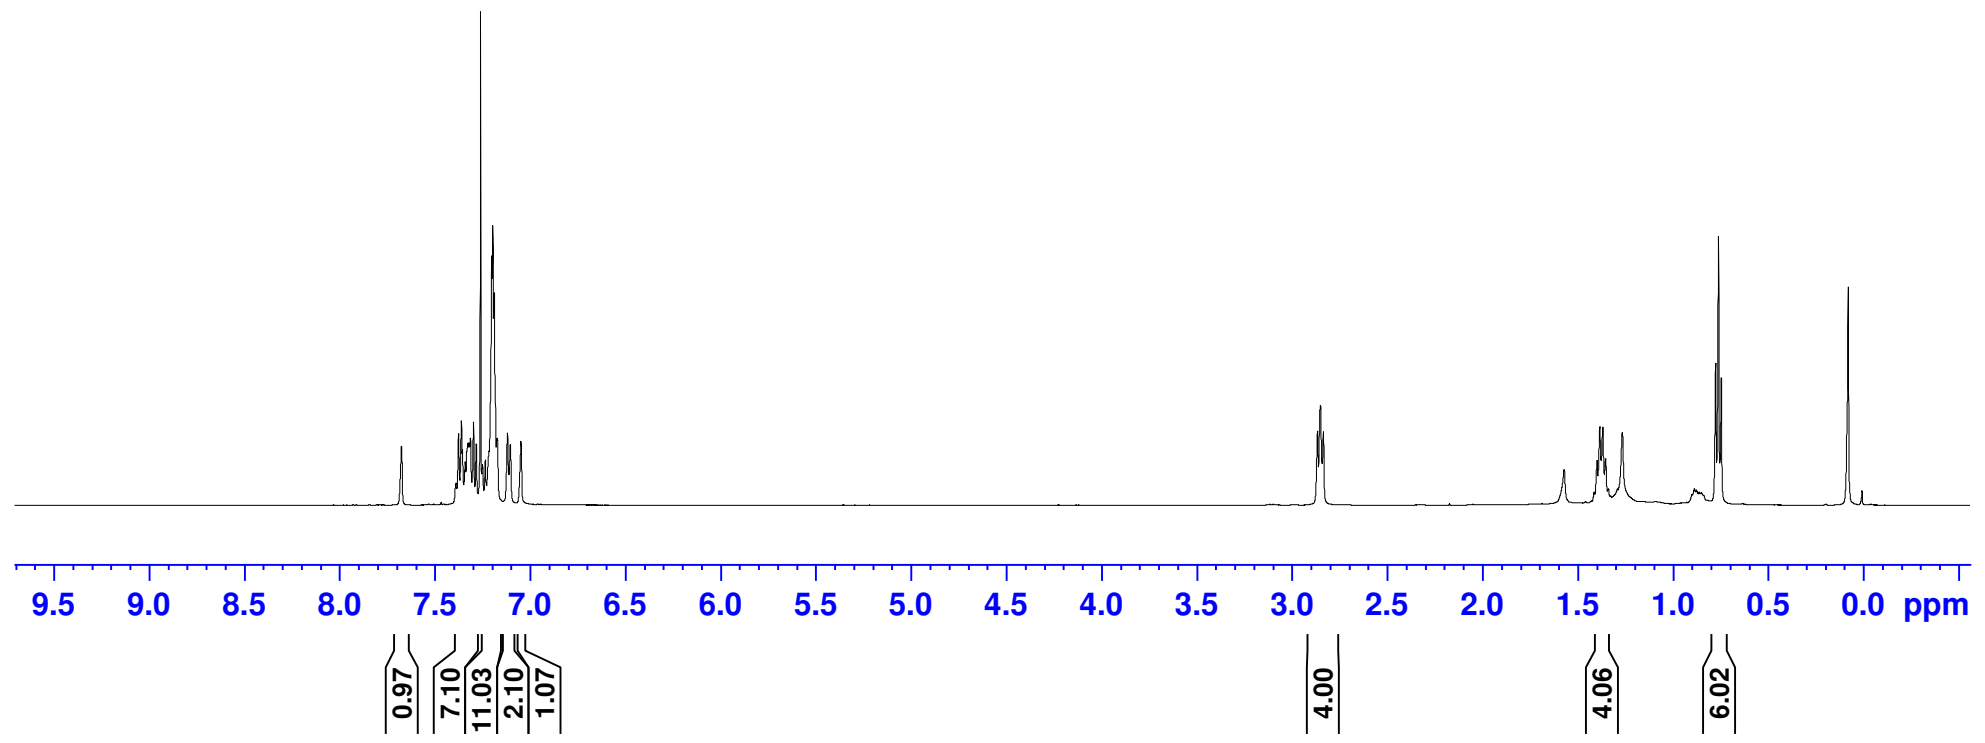

158.50  
151.93  
142.77  
139.44  
138.42  
138.25  
137.91  
136.91  
136.75  
136.36  
131.74  
130.78  
130.57  
129.97  
129.30  
128.97  
128.94  
128.37  
128.15  
127.88  
127.72  
127.65  
127.62  
124.71  
121.89  
119.36

77.25  
77.00  
76.74

49.77

21.70

11.06

MJ-17-98 R

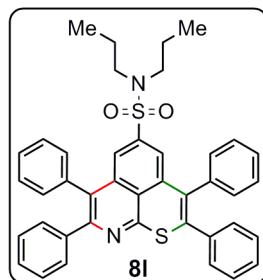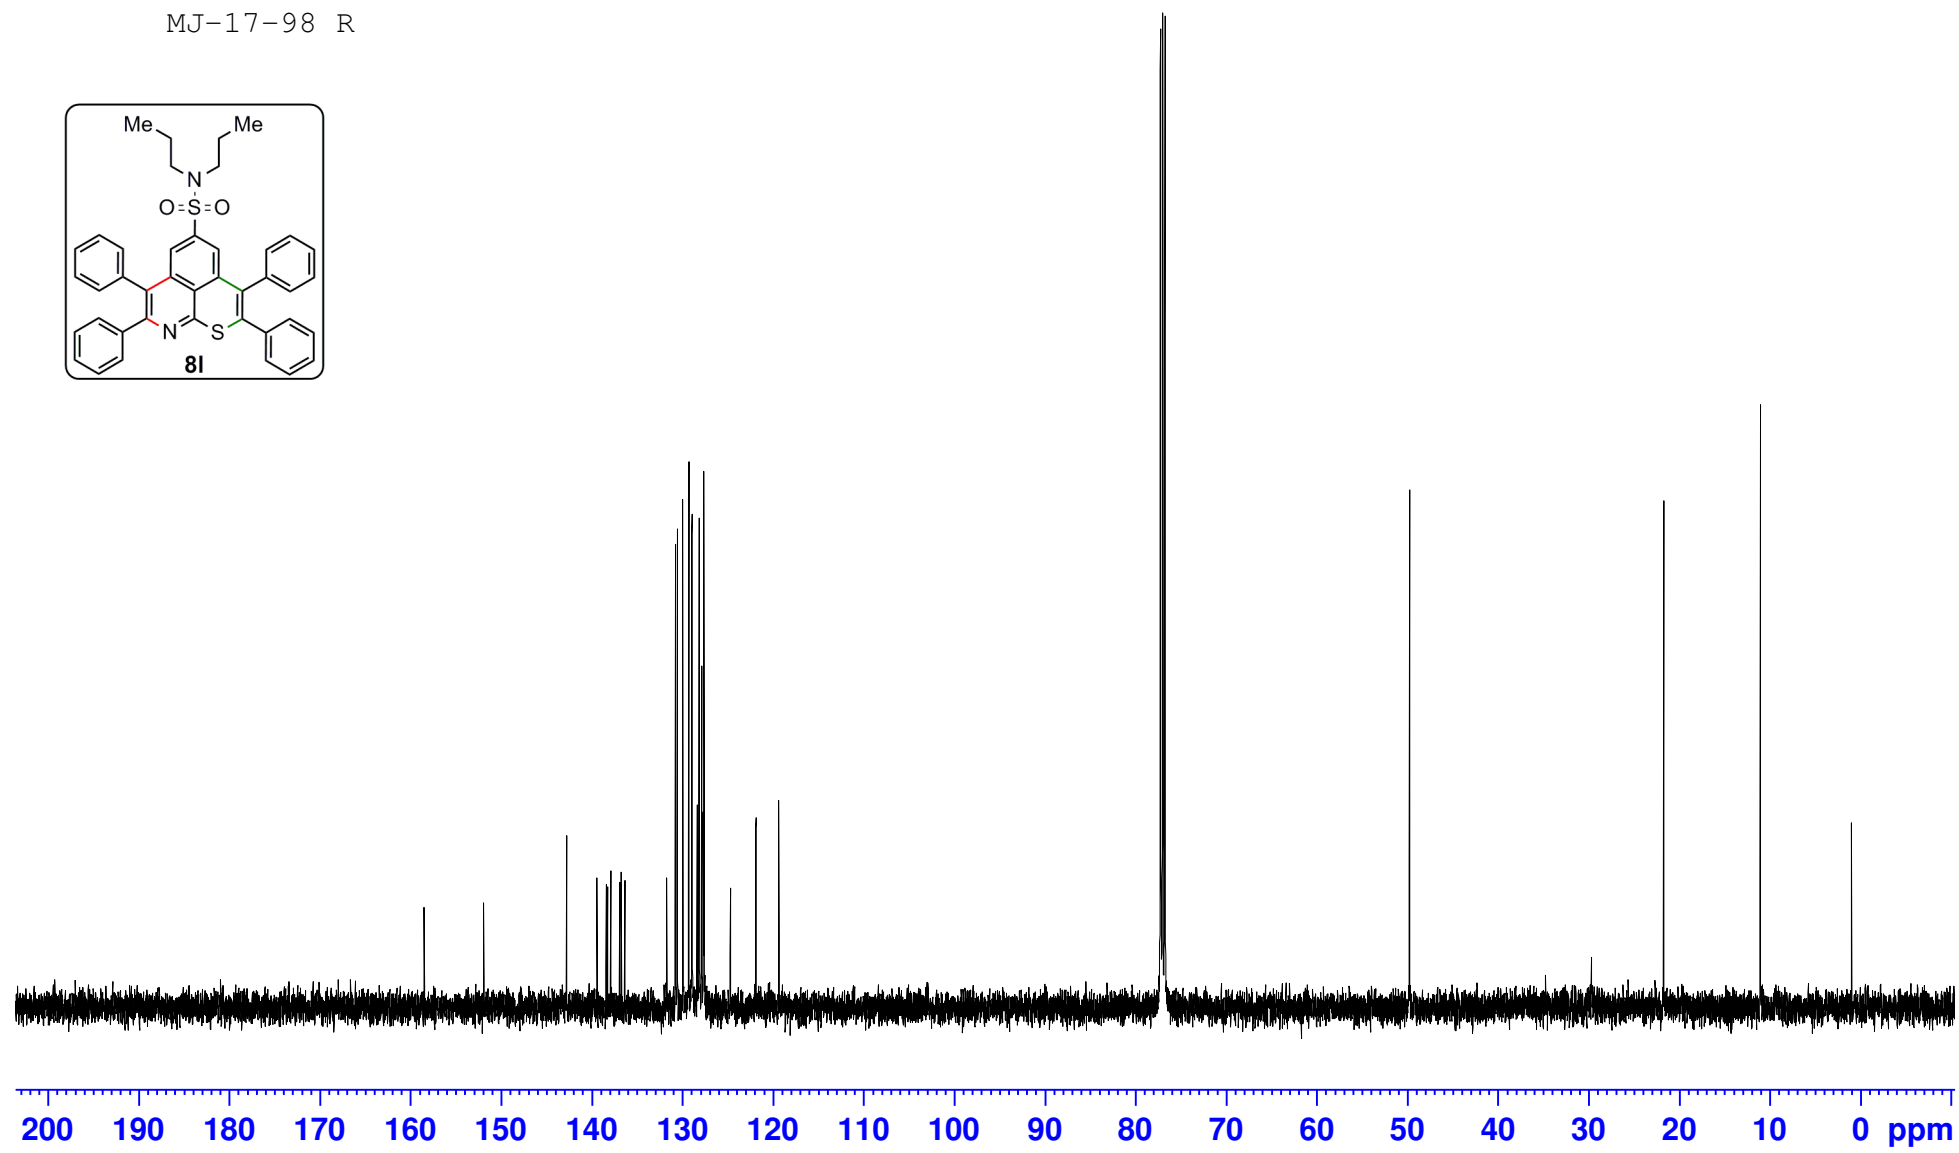

7.718  
7.715  
7.389  
7.373  
7.281  
7.265  
7.251  
7.235  
7.193  
7.176  
7.170  
7.153  
7.128  
7.114  
7.098  
7.090  
7.074  
7.009  
6.993

2.892  
2.877  
2.861

1.425  
1.410  
1.395  
1.379  
1.354  
1.272  
1.260  
1.232  
0.788  
0.773  
0.758

Majji-MJ-17-97

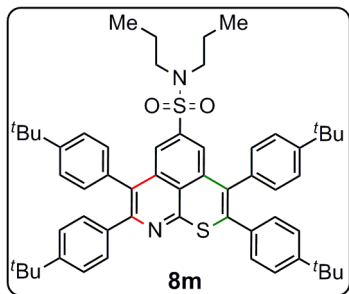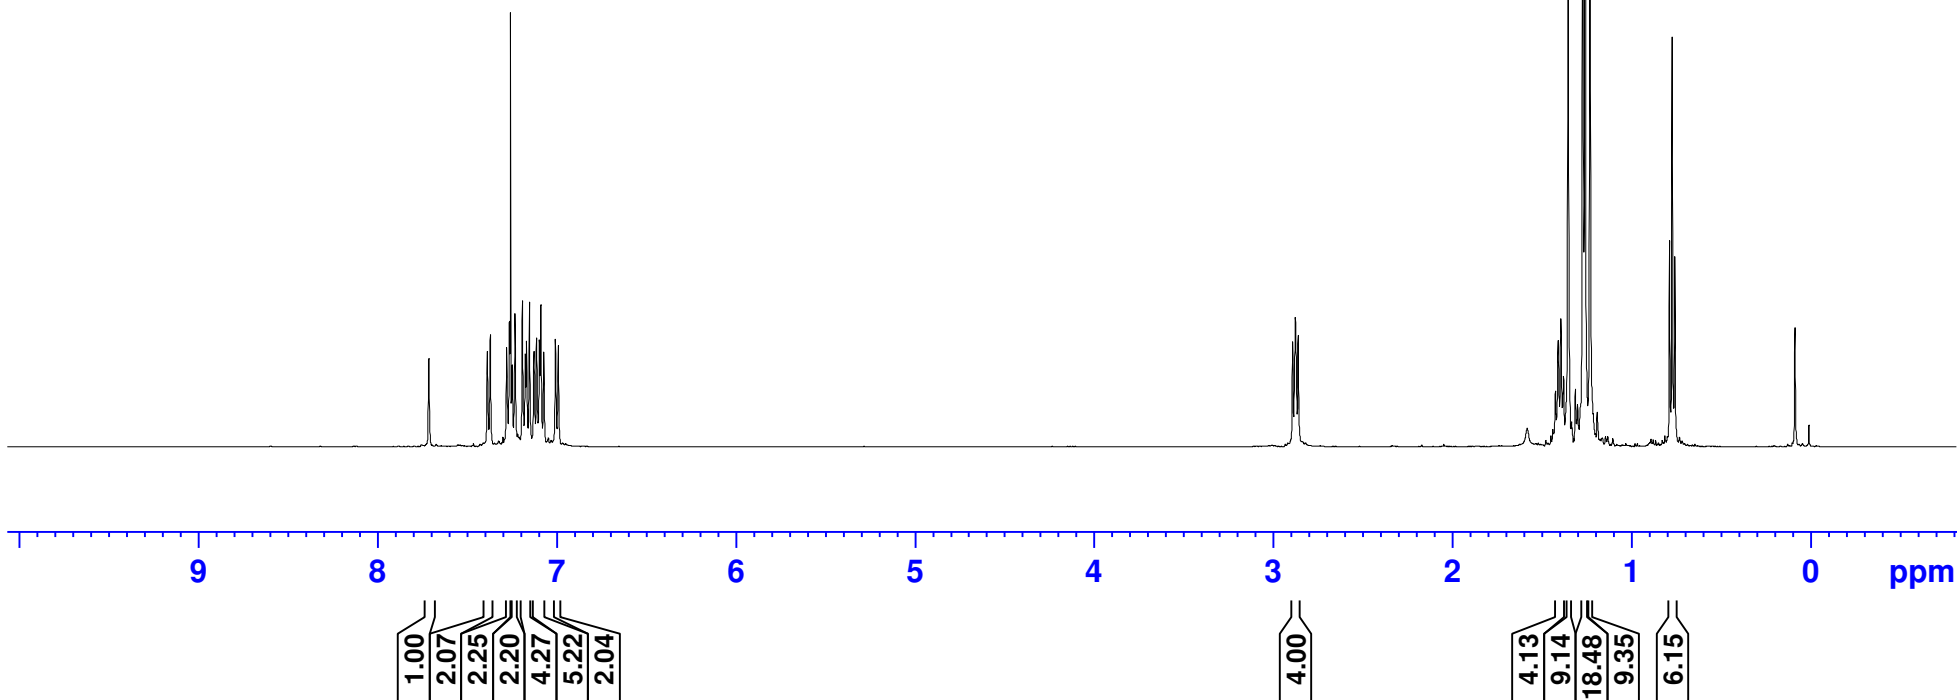

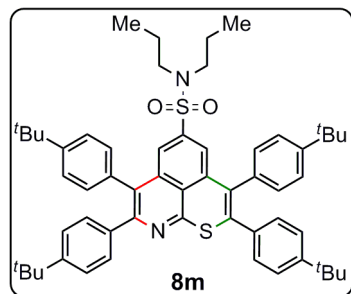

158.33  
151.88  
151.15  
150.65  
150.43  
150.38  
142.58  
138.55  
138.20  
138.05  
136.65  
134.07  
134.02  
133.50  
131.62  
130.48  
130.33  
129.61  
128.95  
127.63  
125.69  
125.53  
124.75  
124.65  
124.45  
121.75  
118.95

77.25  
77.00  
76.74

49.94

34.58  
34.47  
34.41  
31.29  
31.20  
31.18  
31.06

21.82

11.12

MJ-17-97

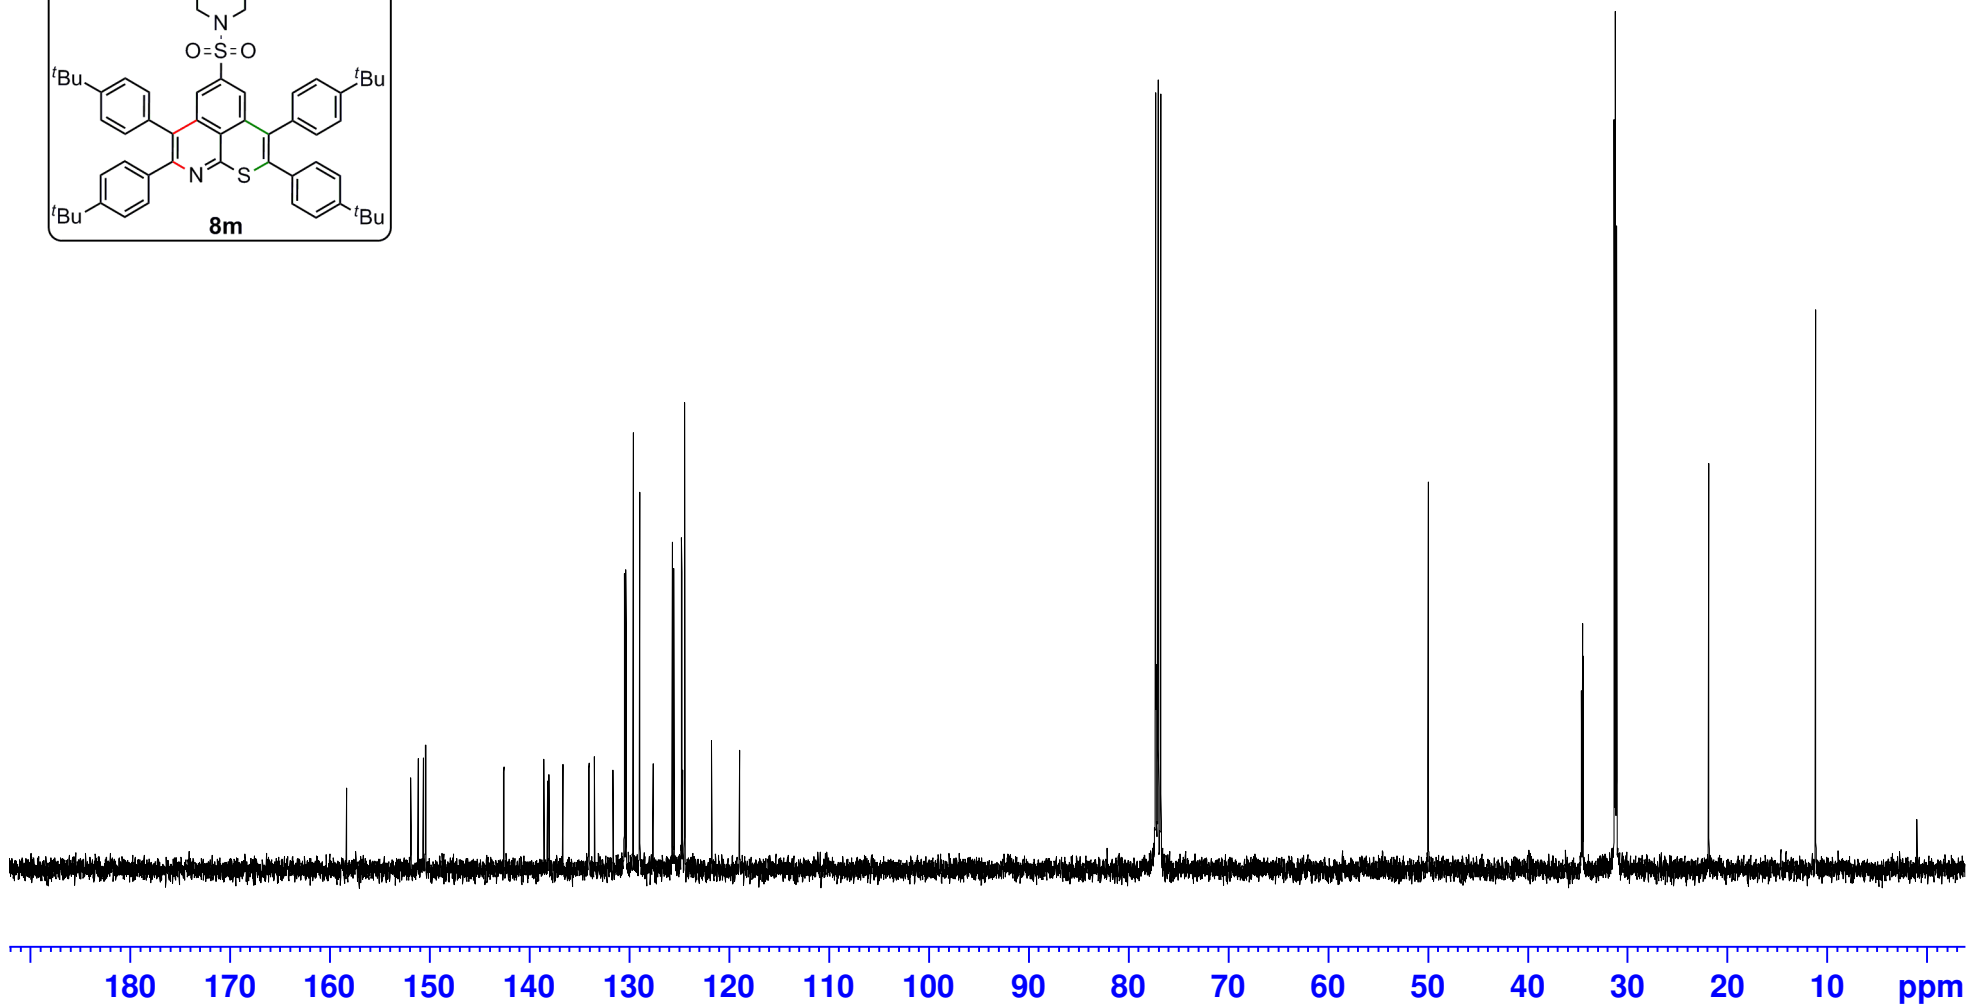

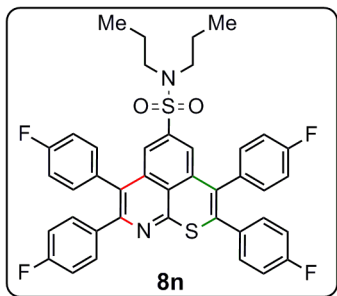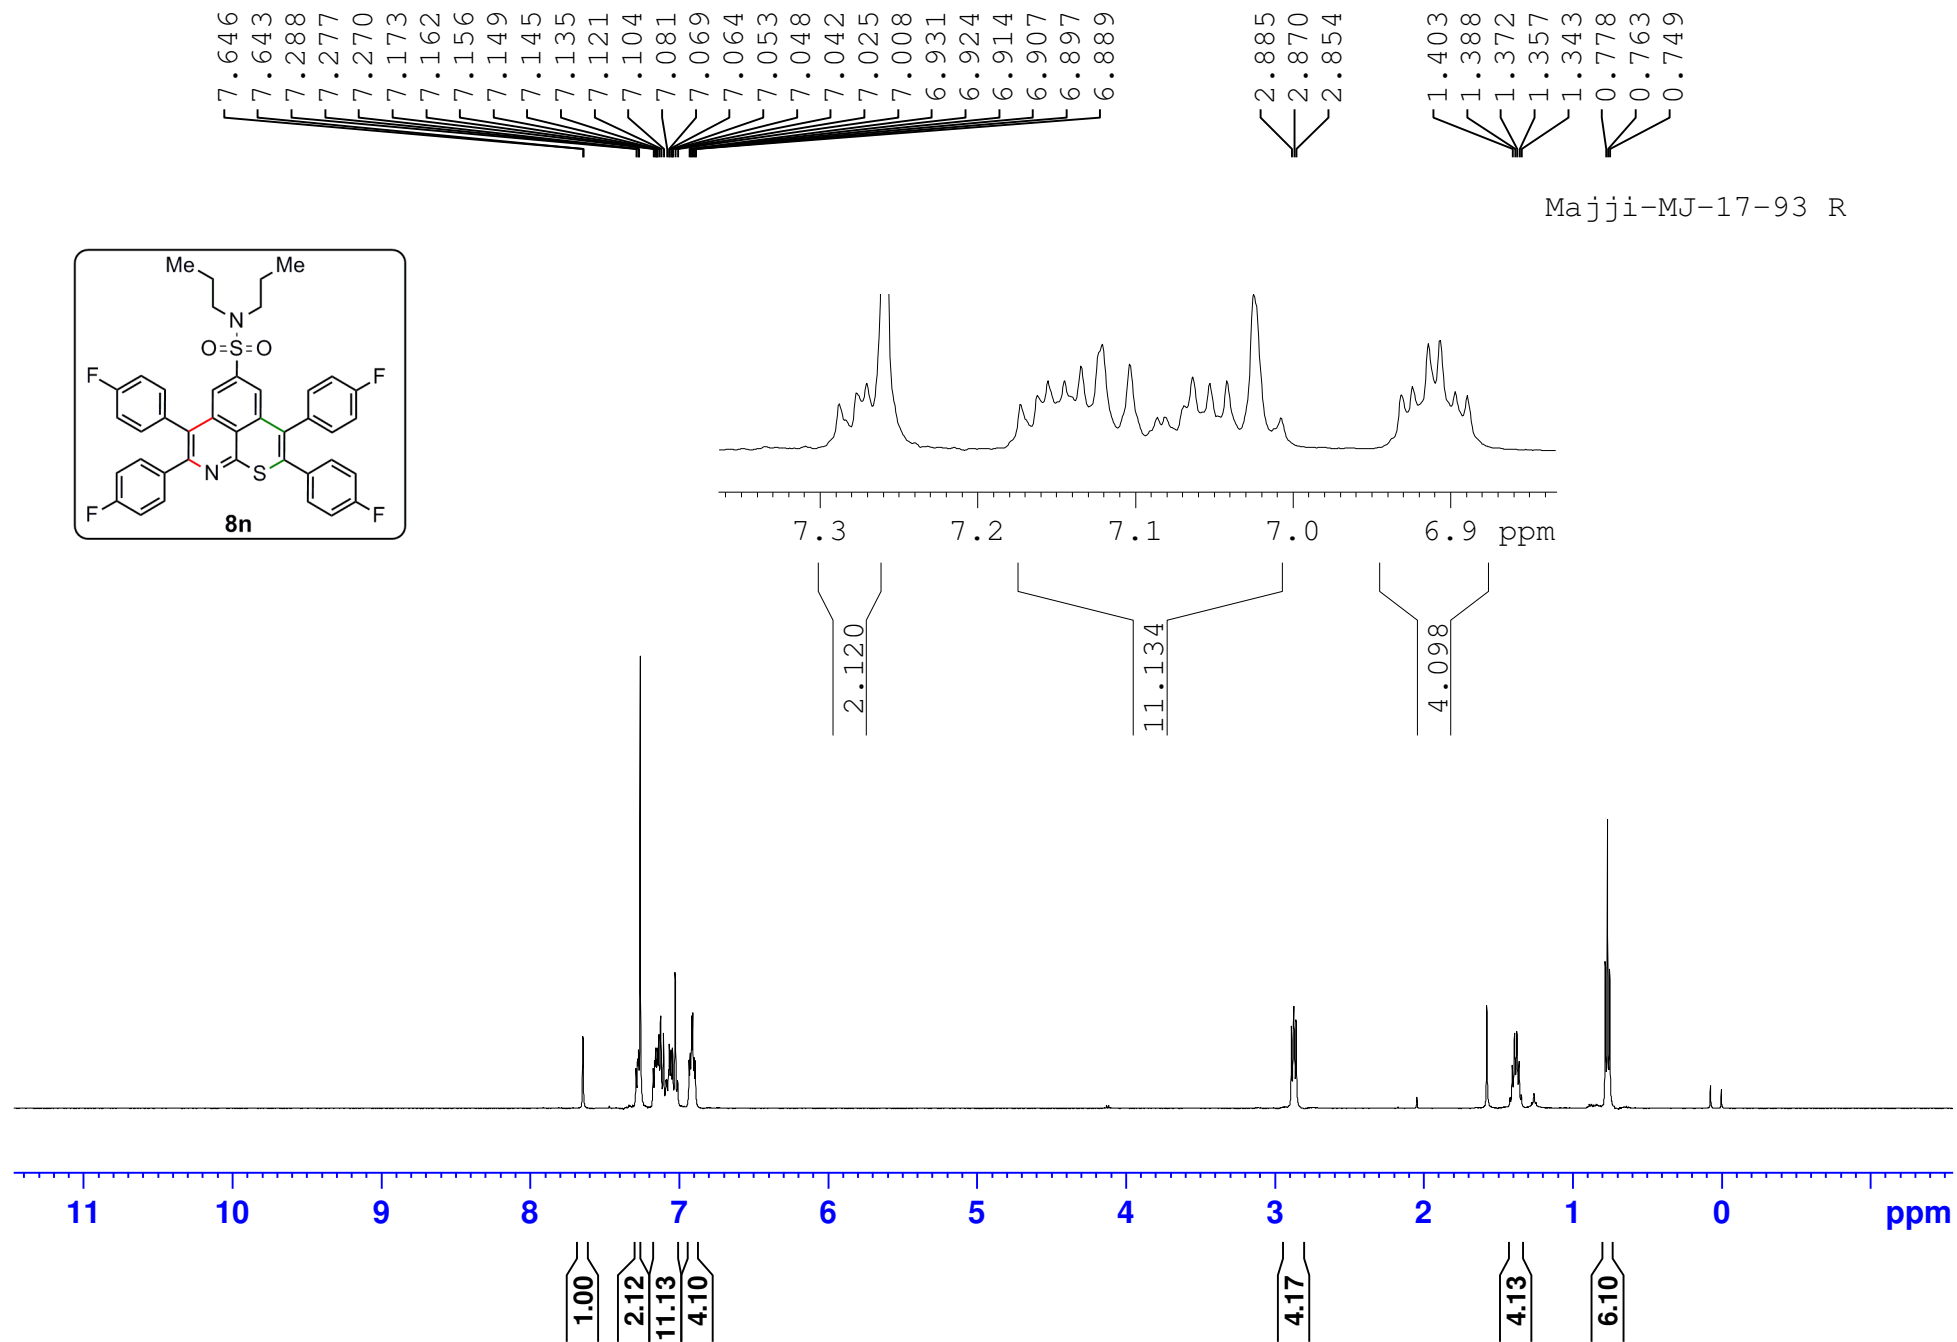

Majji-MJ-17-93 R

163.41  
163.34  
163.31  
163.08  
161.42  
161.37  
161.34  
161.11  
158.46  
151.22  
143.18  
138.22  
137.93  
137.84  
135.18  
135.15  
132.79  
132.46  
132.40  
132.28  
132.21  
132.04  
132.01  
131.80  
131.74  
131.74  
131.17  
131.10  
127.54  
126.78  
124.62  
121.79  
119.42  
116.43  
116.41  
116.26  
116.24  
115.63  
115.45  
114.89  
114.72

77.25  
77.00  
76.74

49.63

21.65

11.01

MJ-17-93

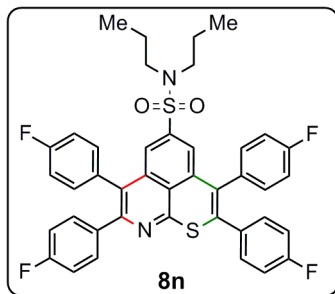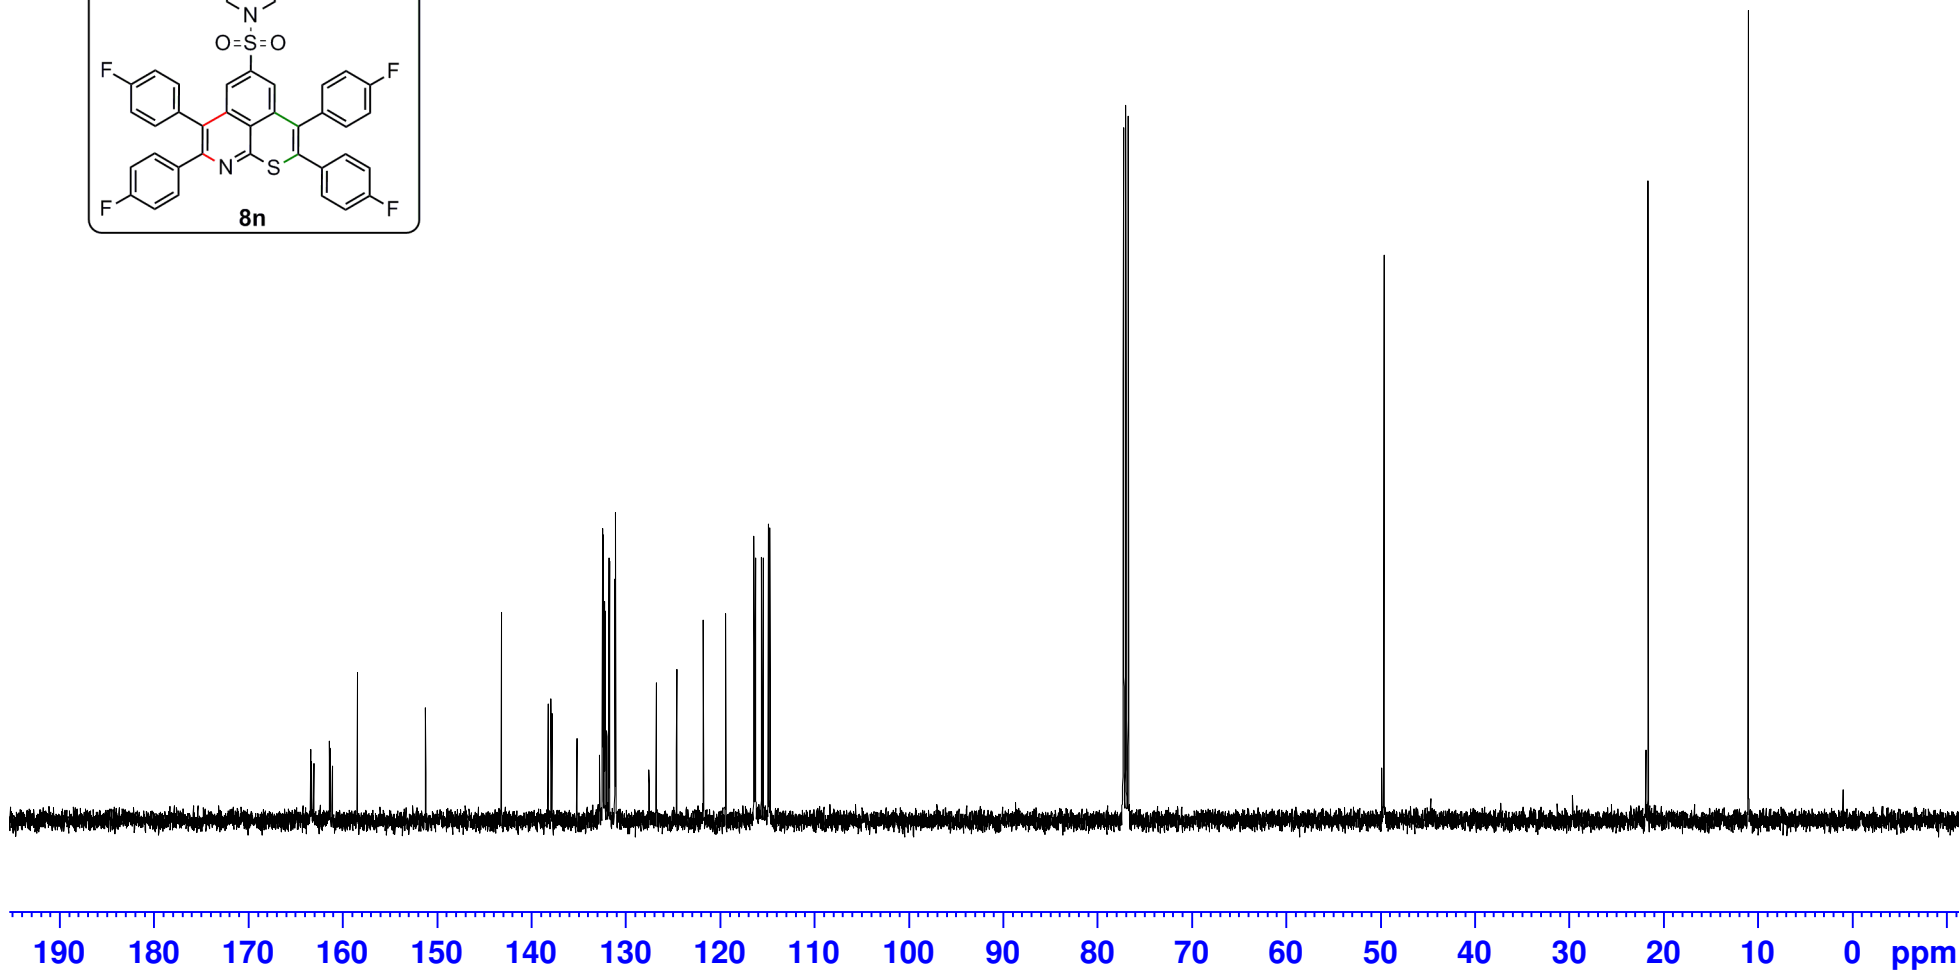

Majji-MJ-17-93 R

-111.55  
-112.93  
-112.96  
-113.52

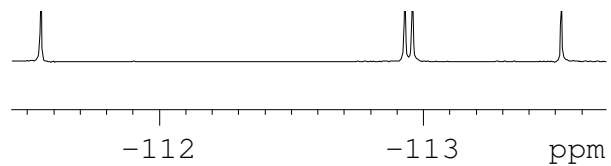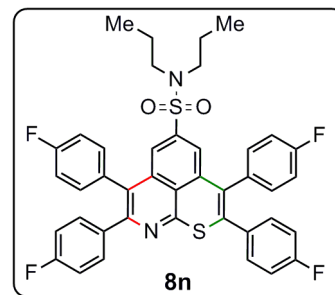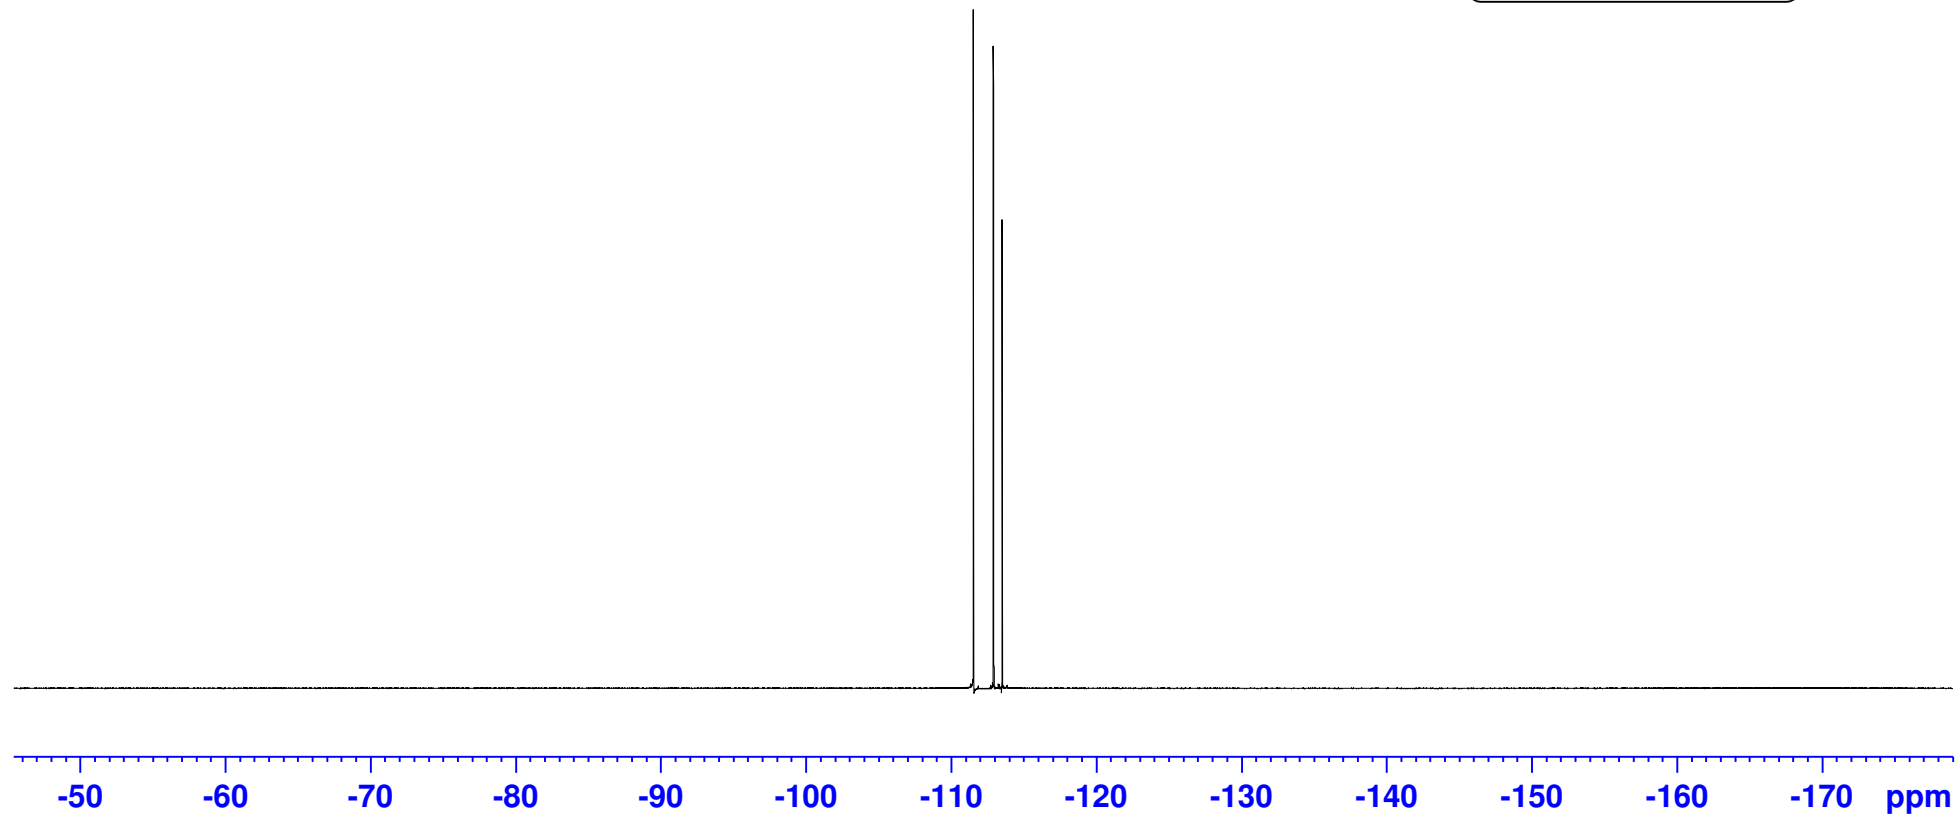

MJ-17-94

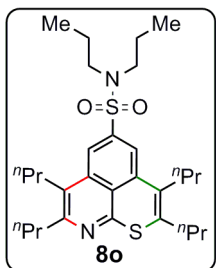

7.930  
7.928  
7.452  
7.450  
7.260

3.139  
3.124  
3.108  
2.844  
2.828  
2.812  
2.792  
2.777  
2.761  
2.626  
2.610  
2.594  
2.516  
2.500  
2.484  
1.770  
1.755  
1.740  
1.724  
1.701  
1.686  
1.671  
1.617  
1.614  
1.603  
1.587  
1.583  
1.572  
1.568  
1.557  
1.535  
1.078  
1.071  
1.064  
1.056  
1.036

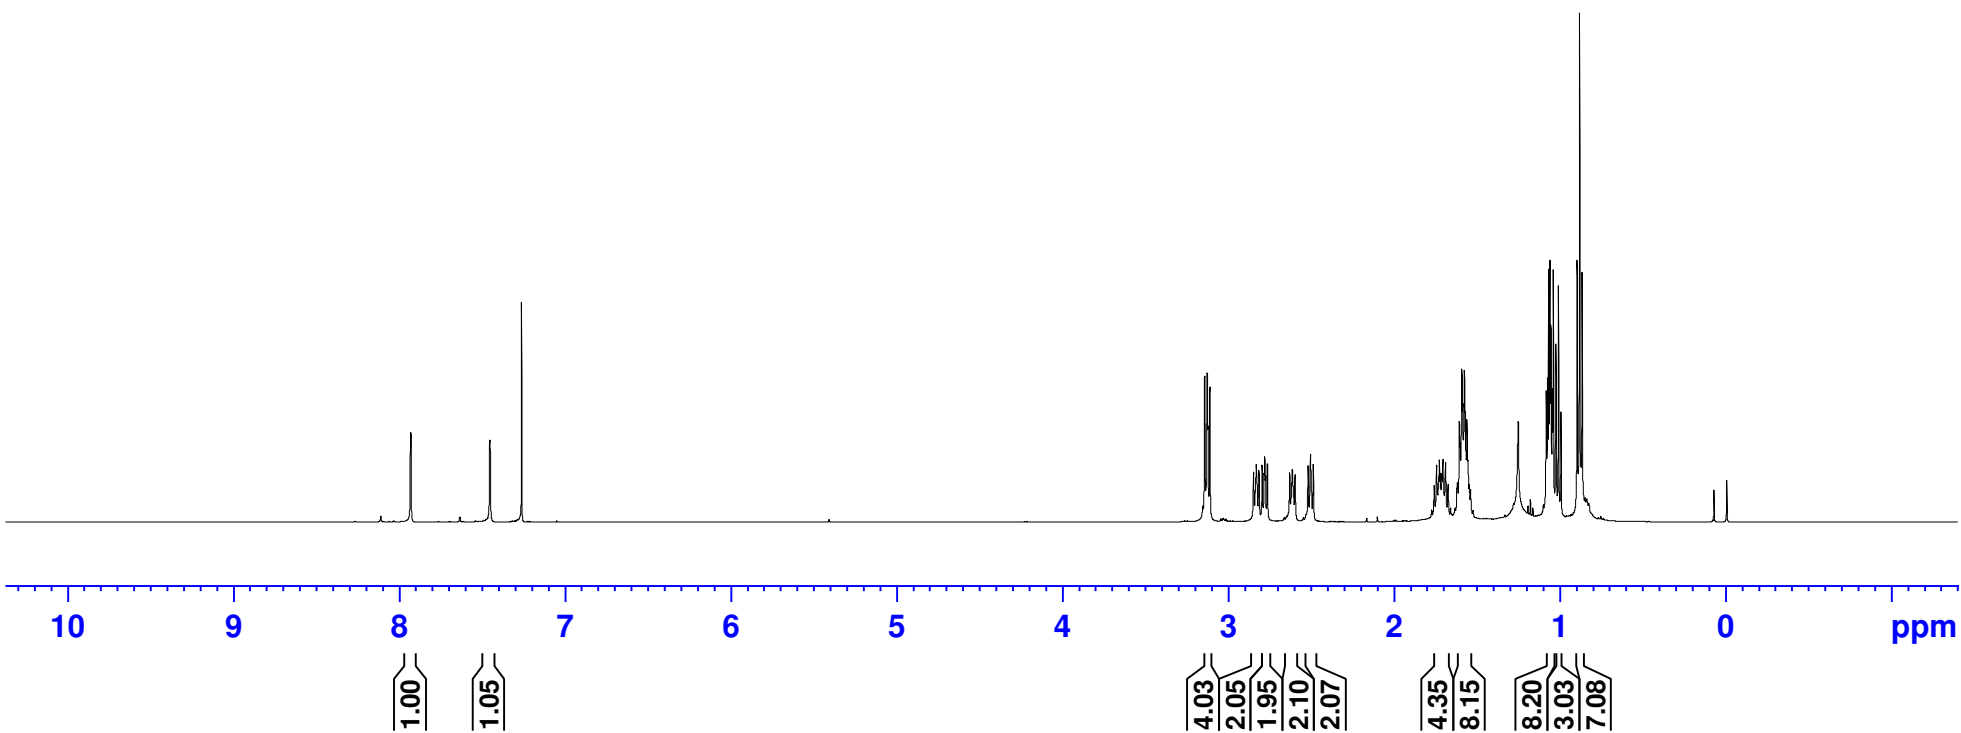



MJ-17-94

155.85  
154.36

141.94  
137.51  
137.25  
137.02

127.12  
124.86  
124.66

119.02  
114.89

77.25  
77.00  
76.74

50.17

36.27  
30.95  
29.75  
23.20  
23.04  
22.98  
22.06  
21.17  
14.33  
14.23  
14.22  
13.95  
11.12

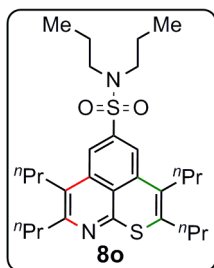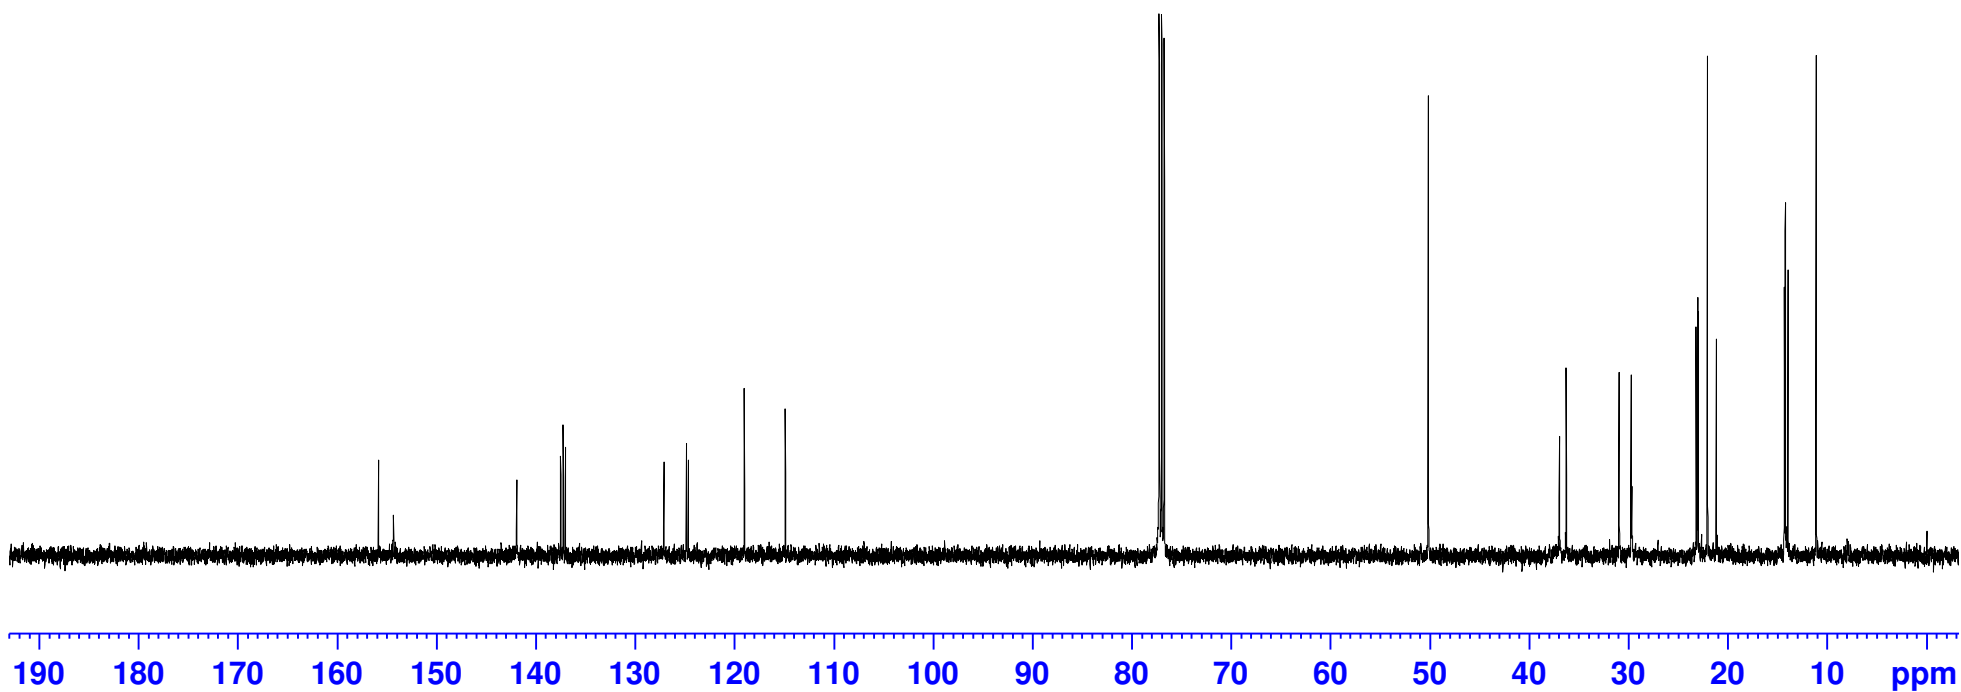

7.417  
7.260  
7.153  
7.151  
7.138  
7.135  
7.129  
7.008  
7.005  
6.993  
6.992  
6.990  
6.977  
6.974  
6.904  
6.902  
6.889  
6.887  
6.874  
6.872  
6.703  
6.702  
6.687  
6.686  
5.191  
2.740  
2.728  
2.725  
2.721  
2.709  
2.684  
2.668  
2.651  
2.471  
2.454  
2.438  
2.422  
1.711  
1.696  
1.682  
1.667  
1.652  
1.387  
1.344  
1.327  
1.026  
1.011  
1.008  
0.996  
0.993  
0.978  
0.942  
0.928  
0.913  
0.906  
0.891  
0.877

SRS-8-93

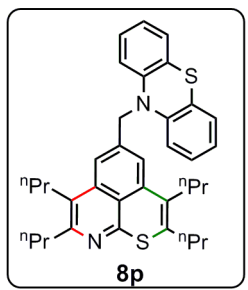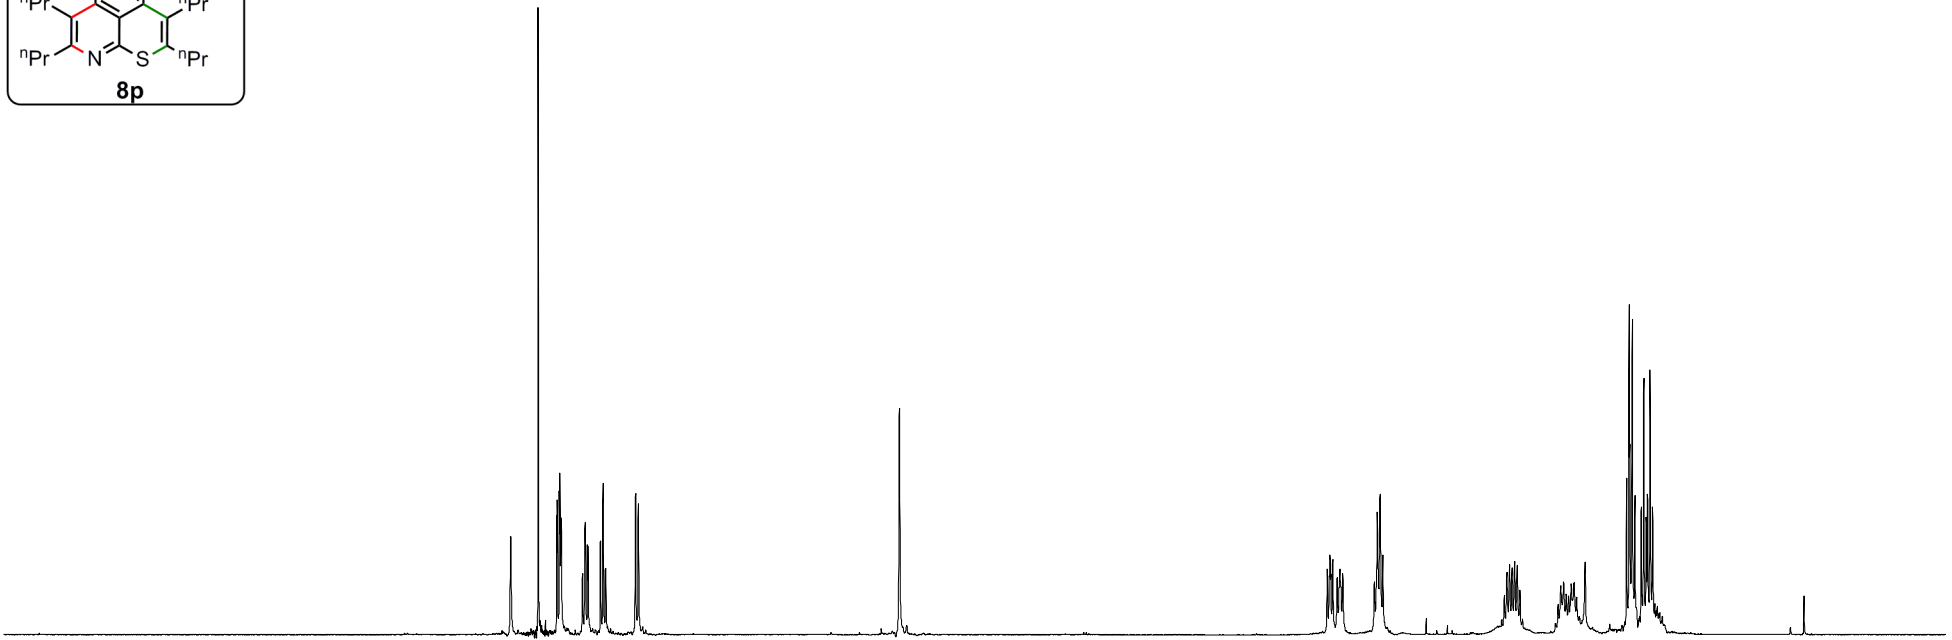

10 9 8 7 6 5 4 3 2 1 0 ppm

1.06  
0.97  
2.13  
2.03  
2.11  
2.05  
2.00  
2.16  
2.13  
4.09  
4.08  
4.20  
6.11  
3.13  
3.07

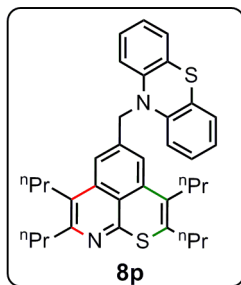

155.53  
153.02  
144.54  
139.11  
137.40  
136.38  
135.28  
127.39  
127.22  
127.02  
123.81  
123.64  
123.25  
122.69  
117.72  
117.02  
115.58

77.25  
77.00  
76.74

52.60

36.99  
36.19  
31.02  
29.91  
23.30  
22.99  
22.77  
21.20  
14.37  
14.23  
14.20  
13.95

SRS-8-93

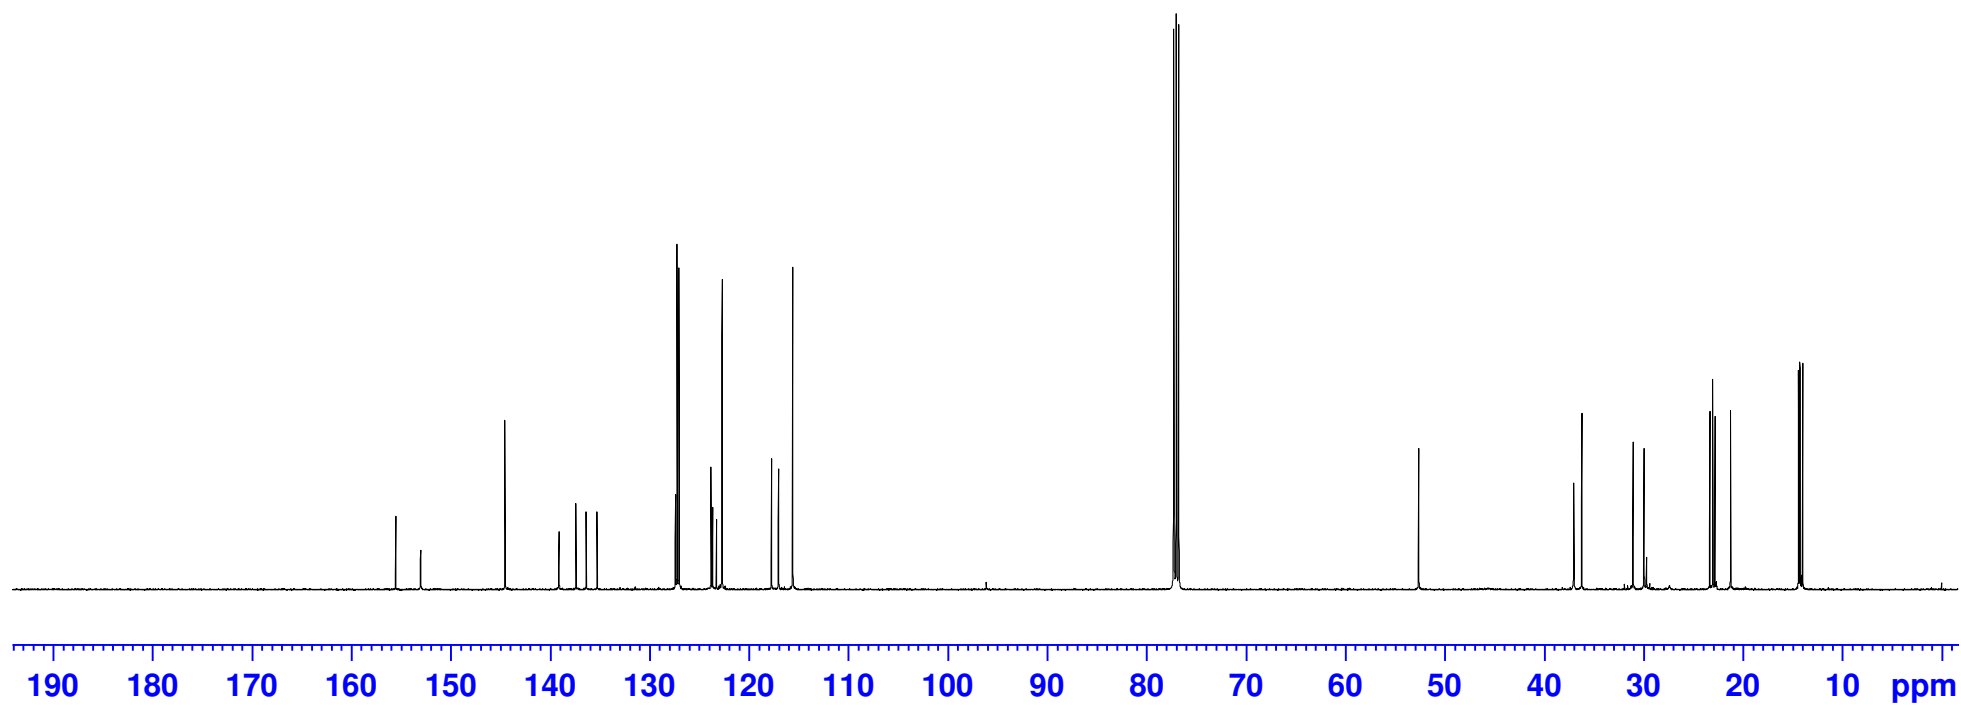

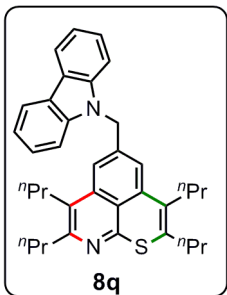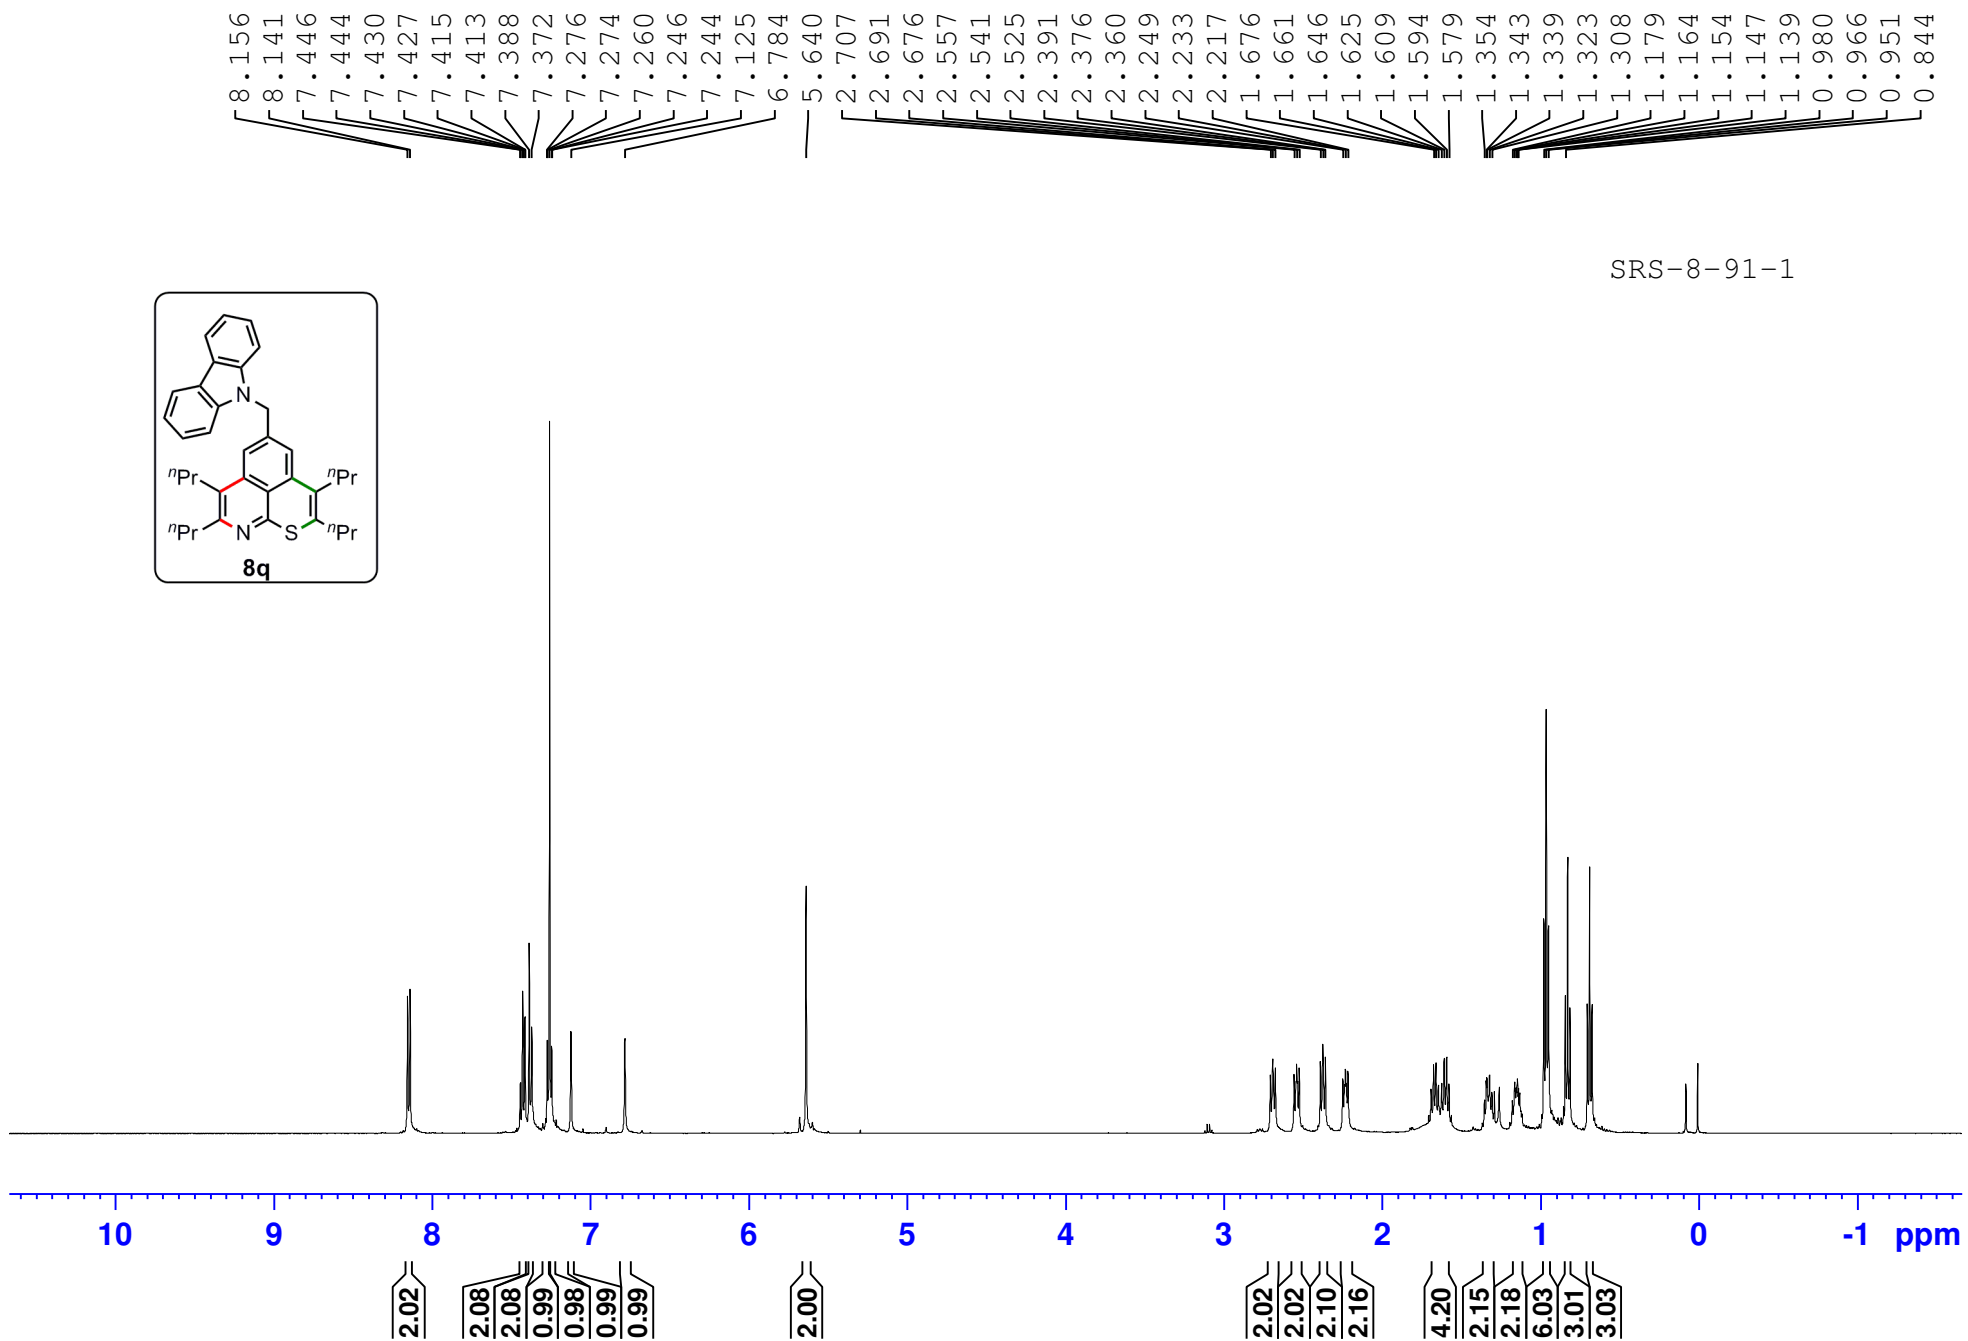

SRS-8-91-1

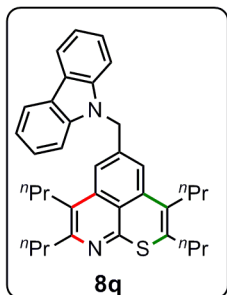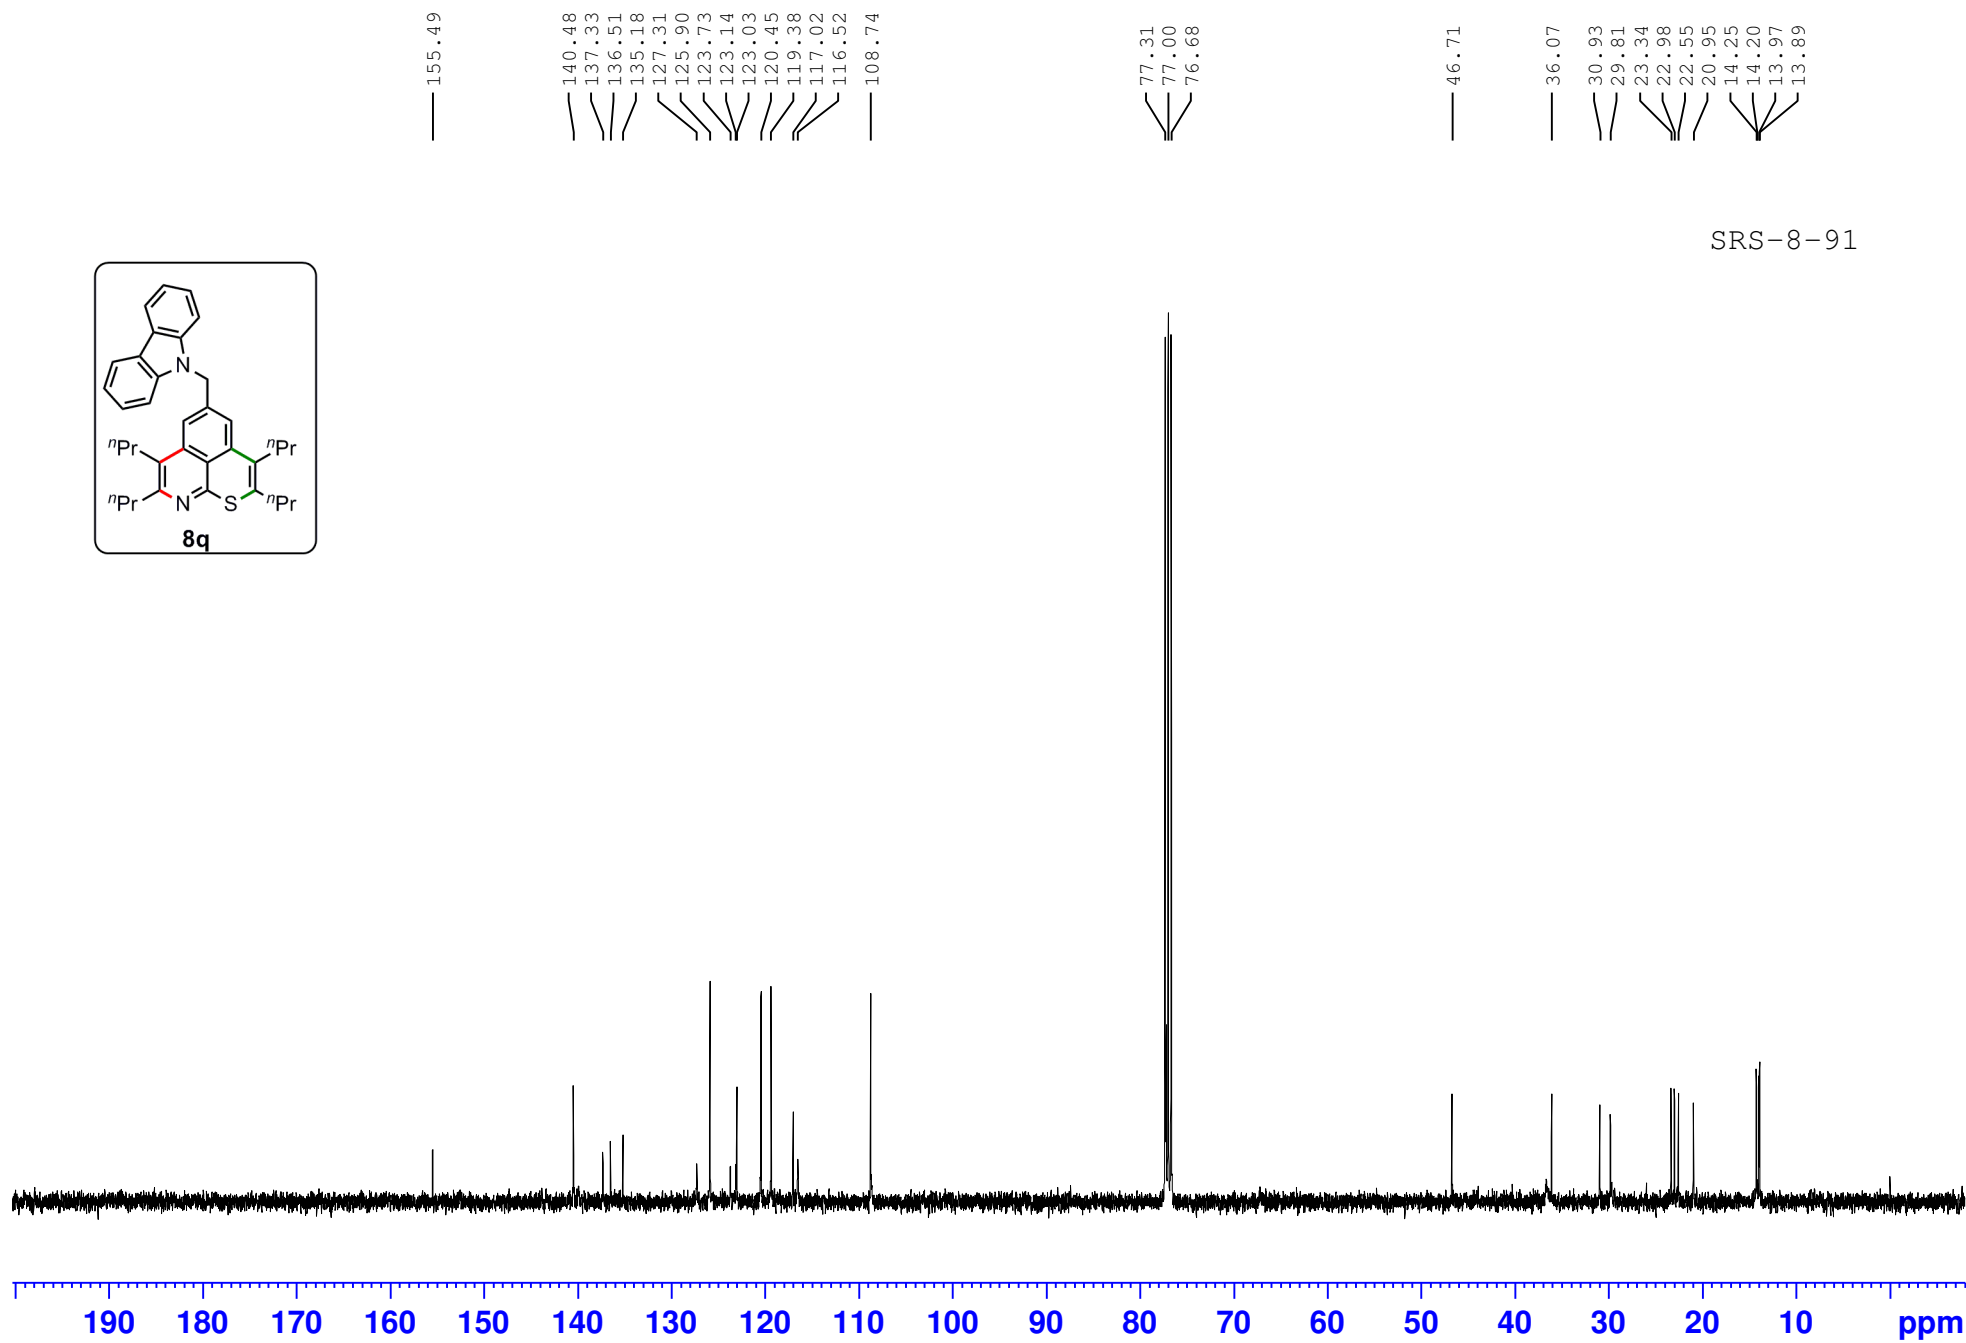

SRS-8-91

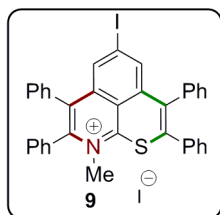

7.569  
7.566  
7.507  
7.503  
7.478  
7.459  
7.423  
7.418  
7.407  
7.403  
7.388  
7.367  
7.349  
7.330  
7.313  
7.218  
7.201

3.710  
3.410

2.521  
2.516  
2.512

MAJII-MJ-17-sALT

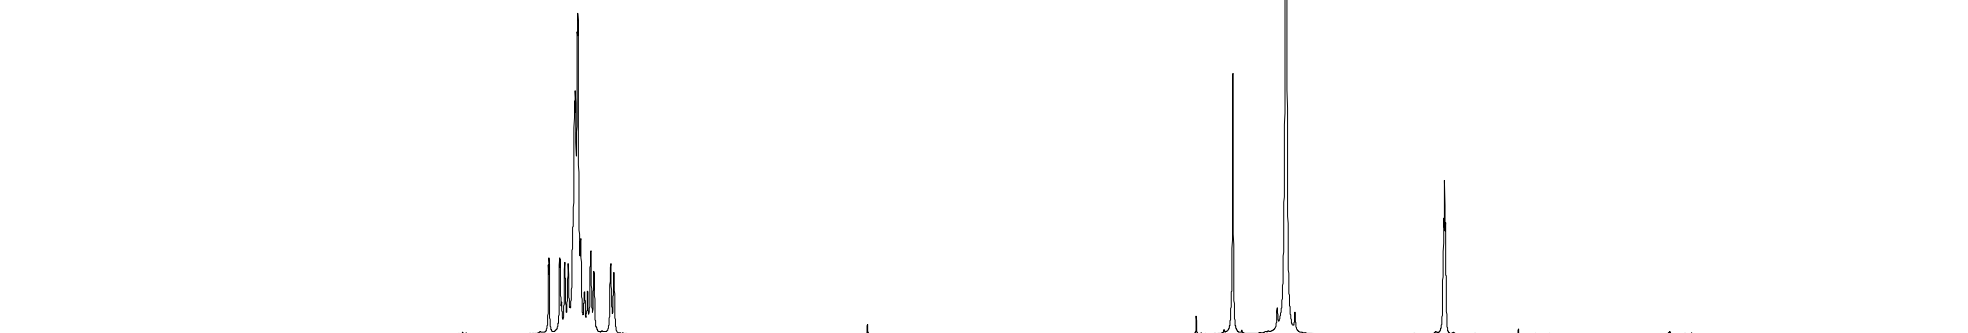

10 9 8 7 6 5 4 3 2 1 ppm

1.02  
1.03  
2.05  
13.09  
3.17  
2.04

3.00

SD-17-221

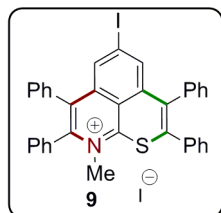

157.17  
144.41  
135.40  
134.69  
132.87  
132.60  
132.43  
132.16  
132.01  
131.50  
130.67  
129.70  
128.50  
128.23  
128.01  
127.95  
127.89  
127.81  
127.32  
126.96  
126.62  
120.56

77.26  
77.00  
76.73

41.48  
38.20  
38.04  
37.87  
37.70  
37.53  
37.37  
37.20

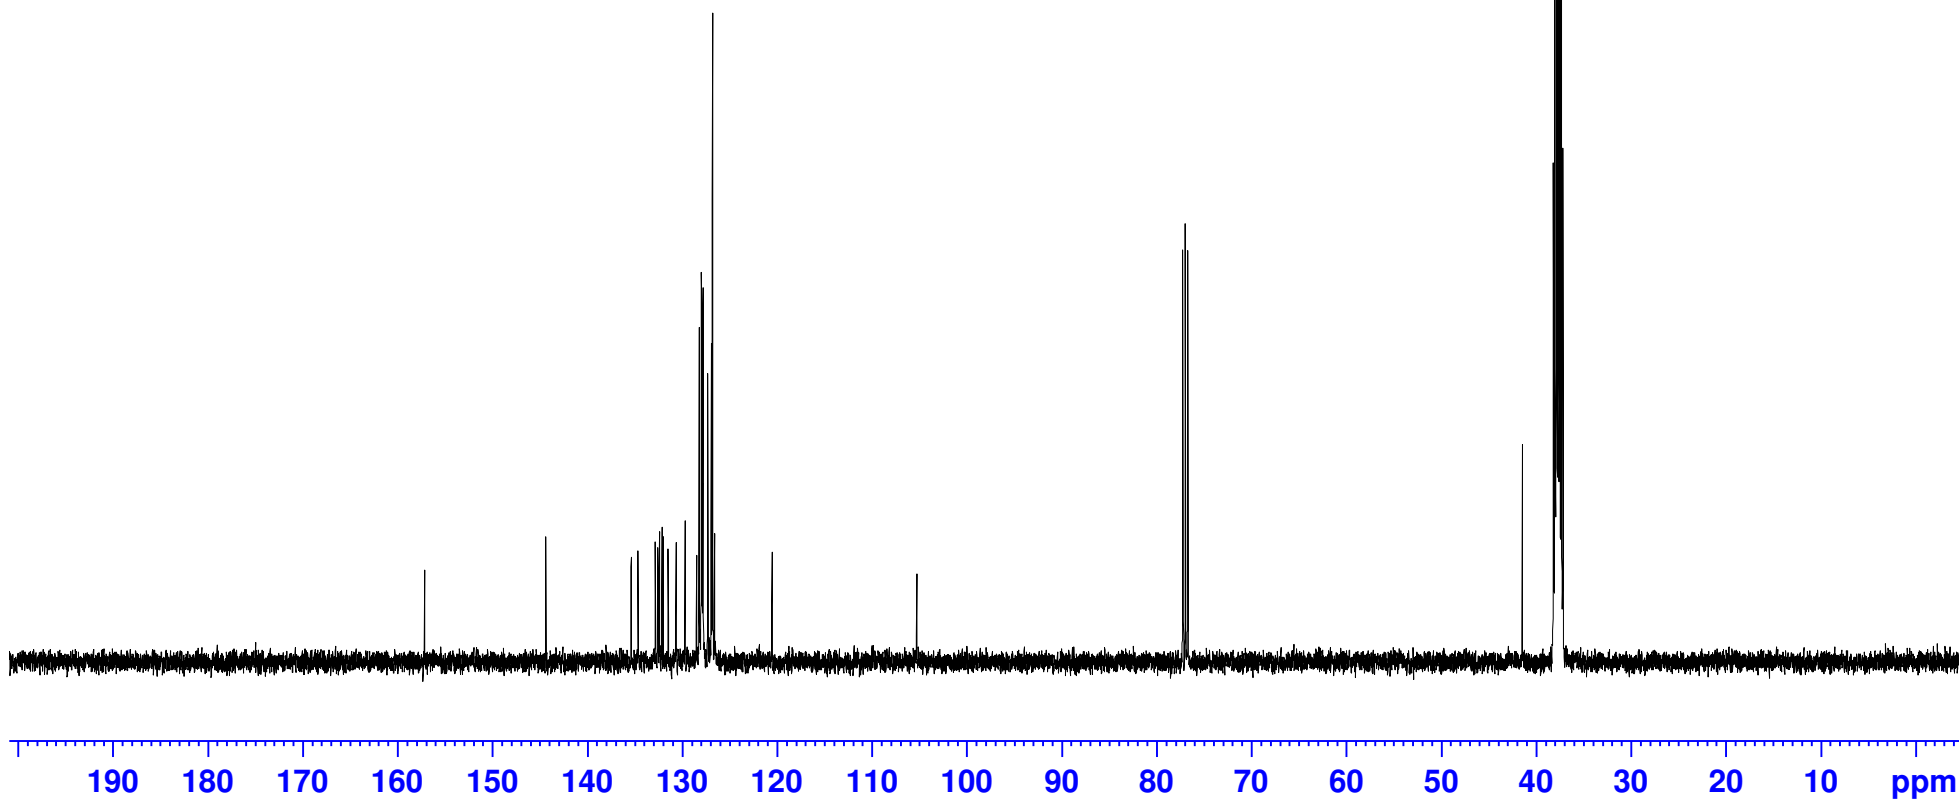

MJ-17-224

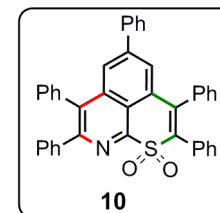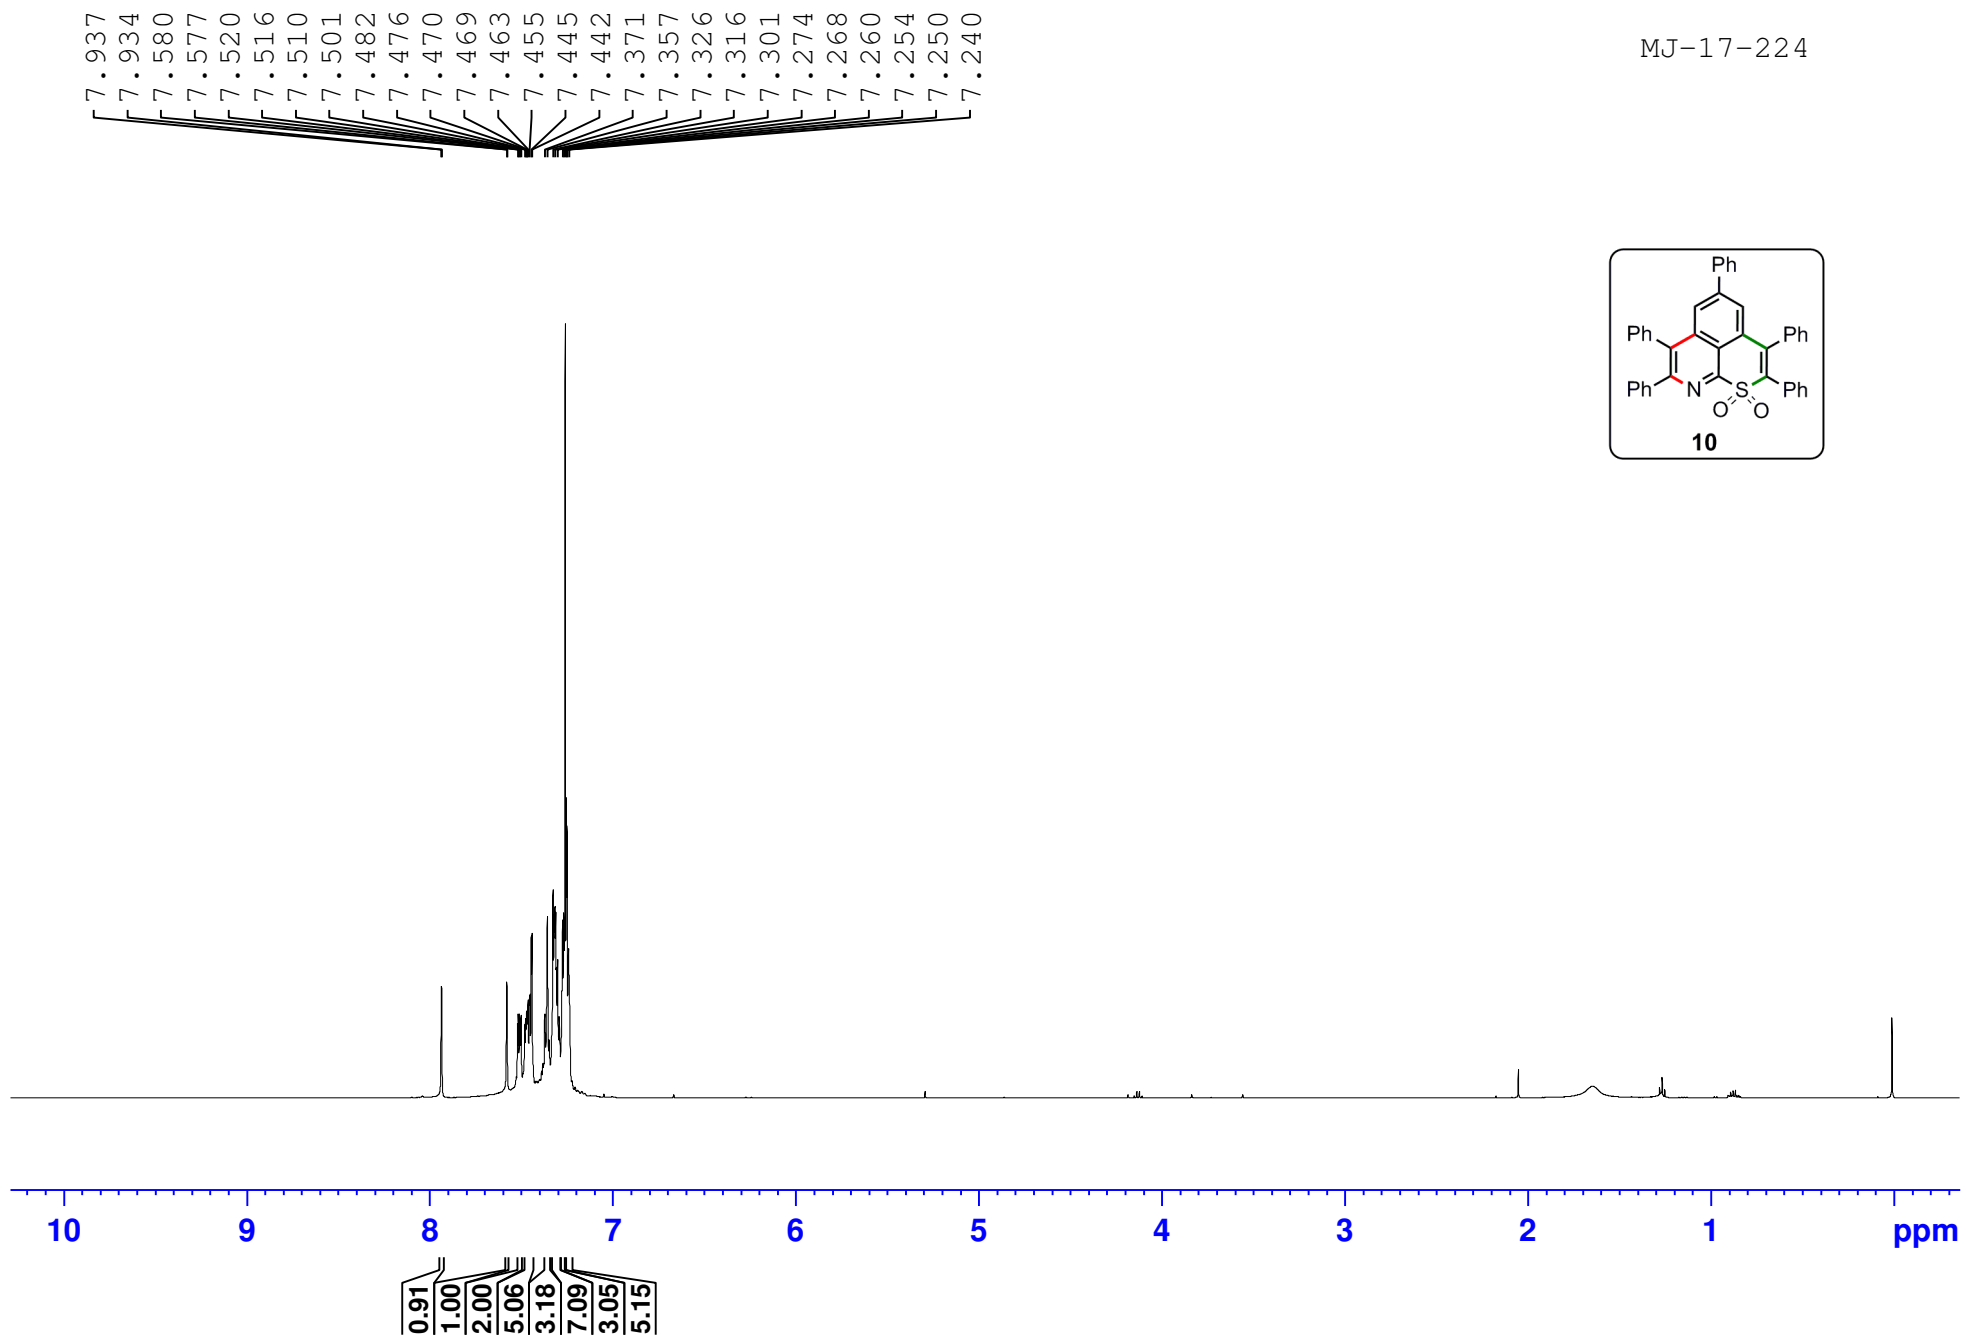



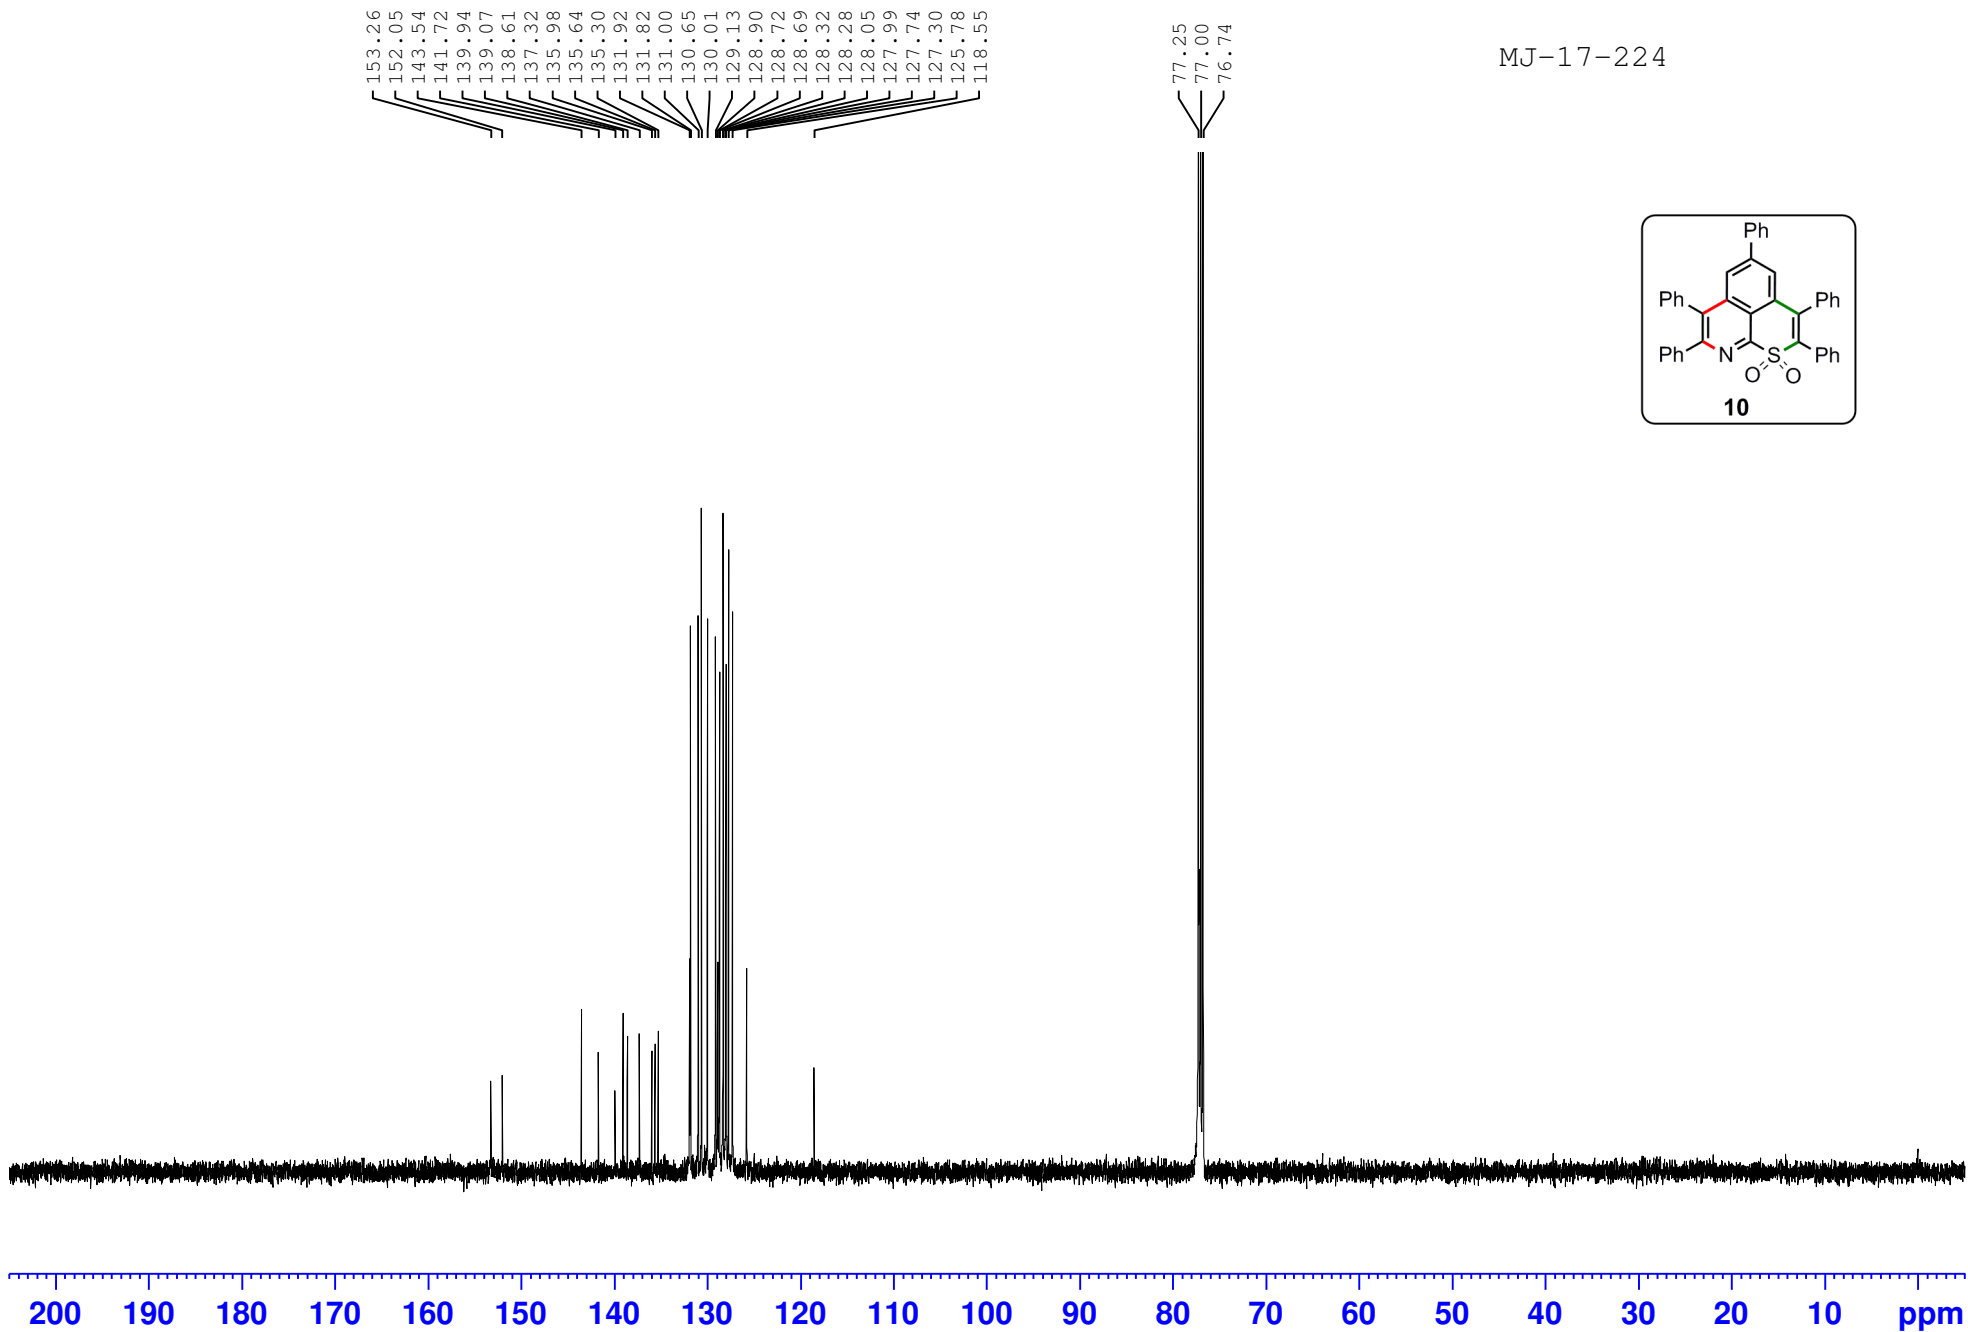

SD-17-MON

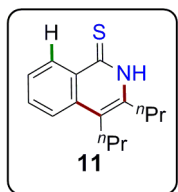

— 13.069

8.855  
8.853  
8.835  
8.832  
7.850  
7.830  
7.804  
7.800  
7.787  
7.783  
7.766  
7.763  
7.564  
7.561  
7.544  
7.526  
7.523

3.386  
2.751  
2.730  
2.711  
2.691  
2.520  
2.516  
2.512  
1.642  
1.624  
1.605  
1.586  
1.567  
1.547  
1.527  
1.508  
1.489  
1.470  
1.017  
0.999  
0.980  
0.972

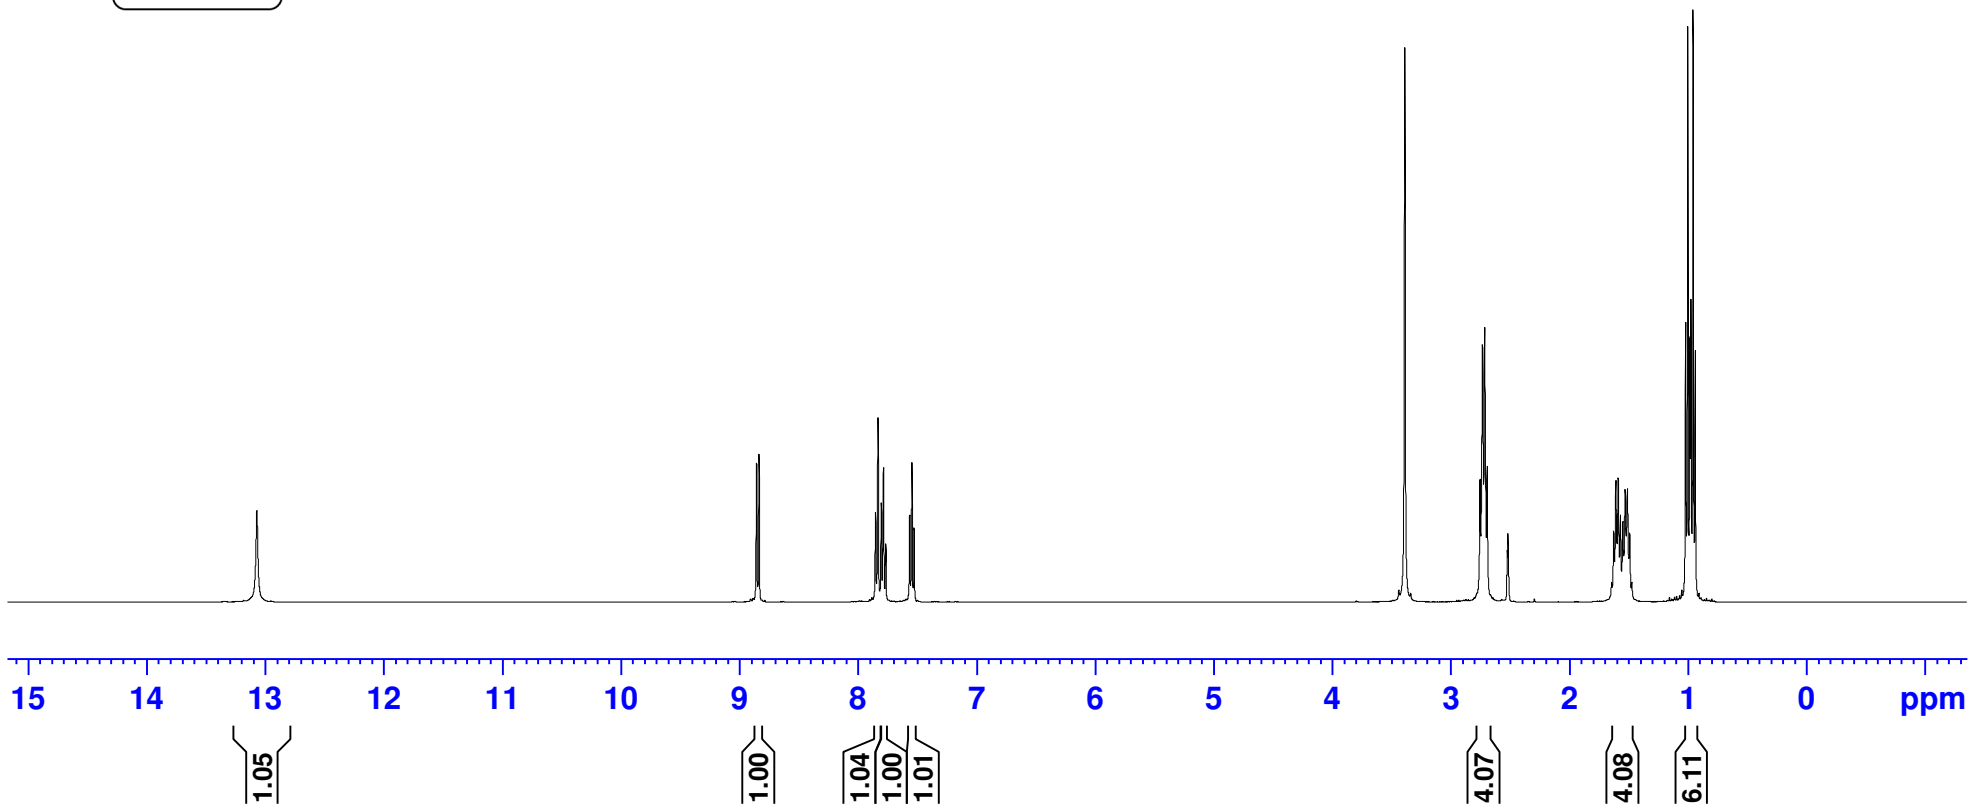

SD-17-MON

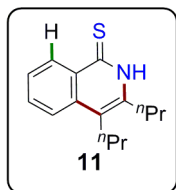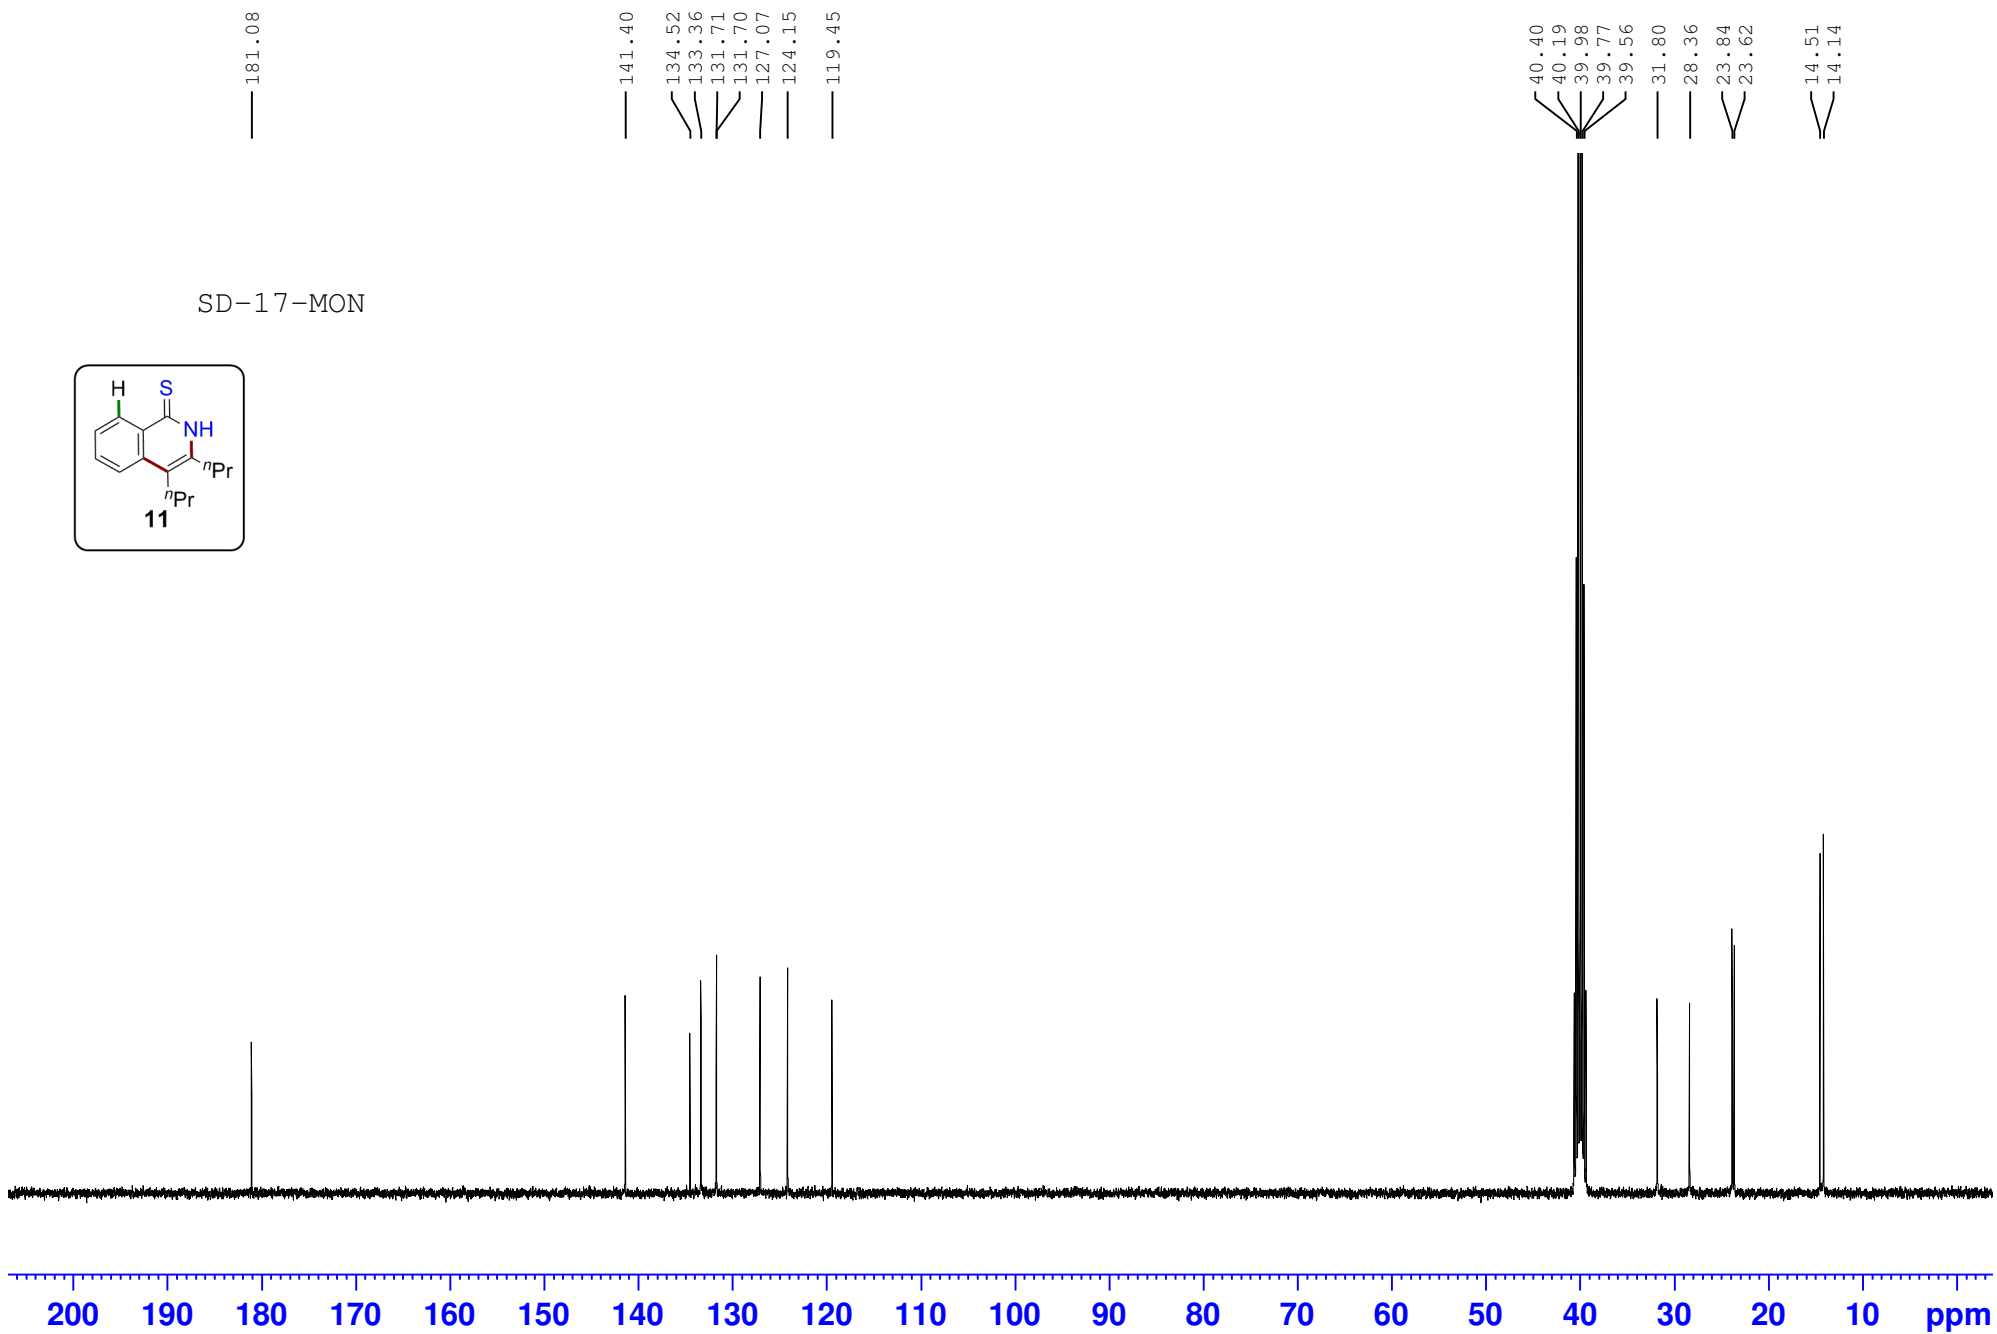

MJ-17-251

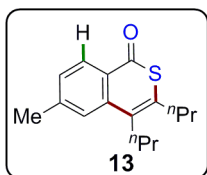

8.265  
8.249  
7.556  
7.316  
7.299  
7.260

2.809  
2.793  
2.777  
2.633  
2.617  
2.601  
2.504  
1.713  
1.698  
1.683  
1.667  
1.630  
1.614  
1.599  
1.095  
1.081  
1.066  
1.038  
1.023  
1.009

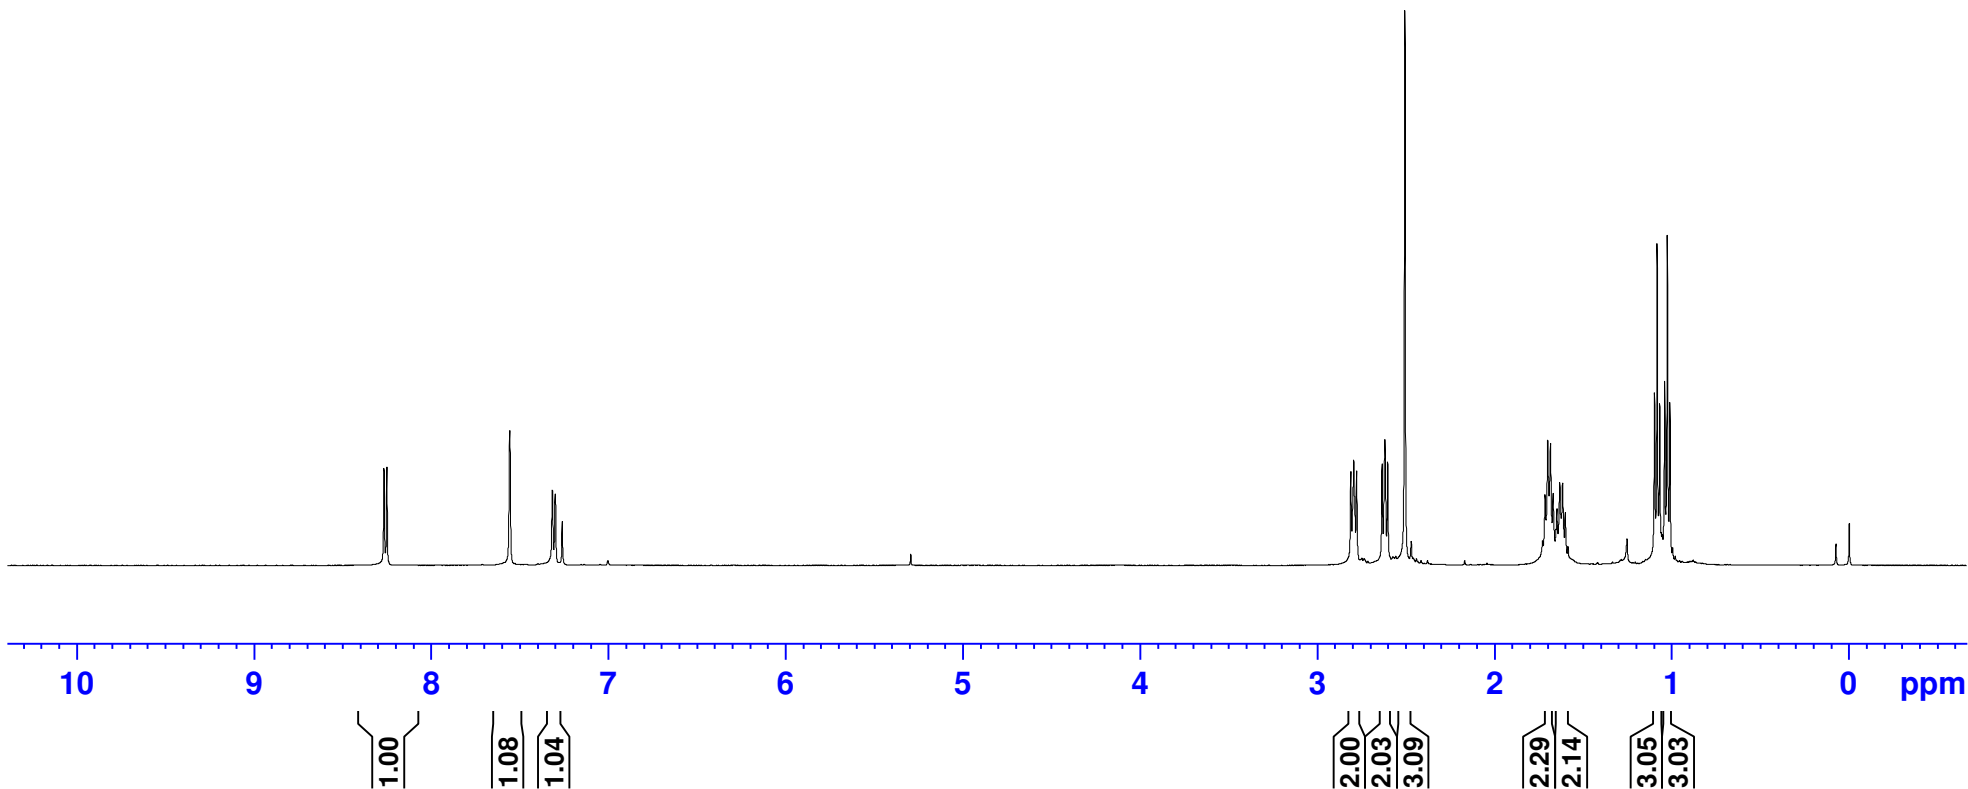

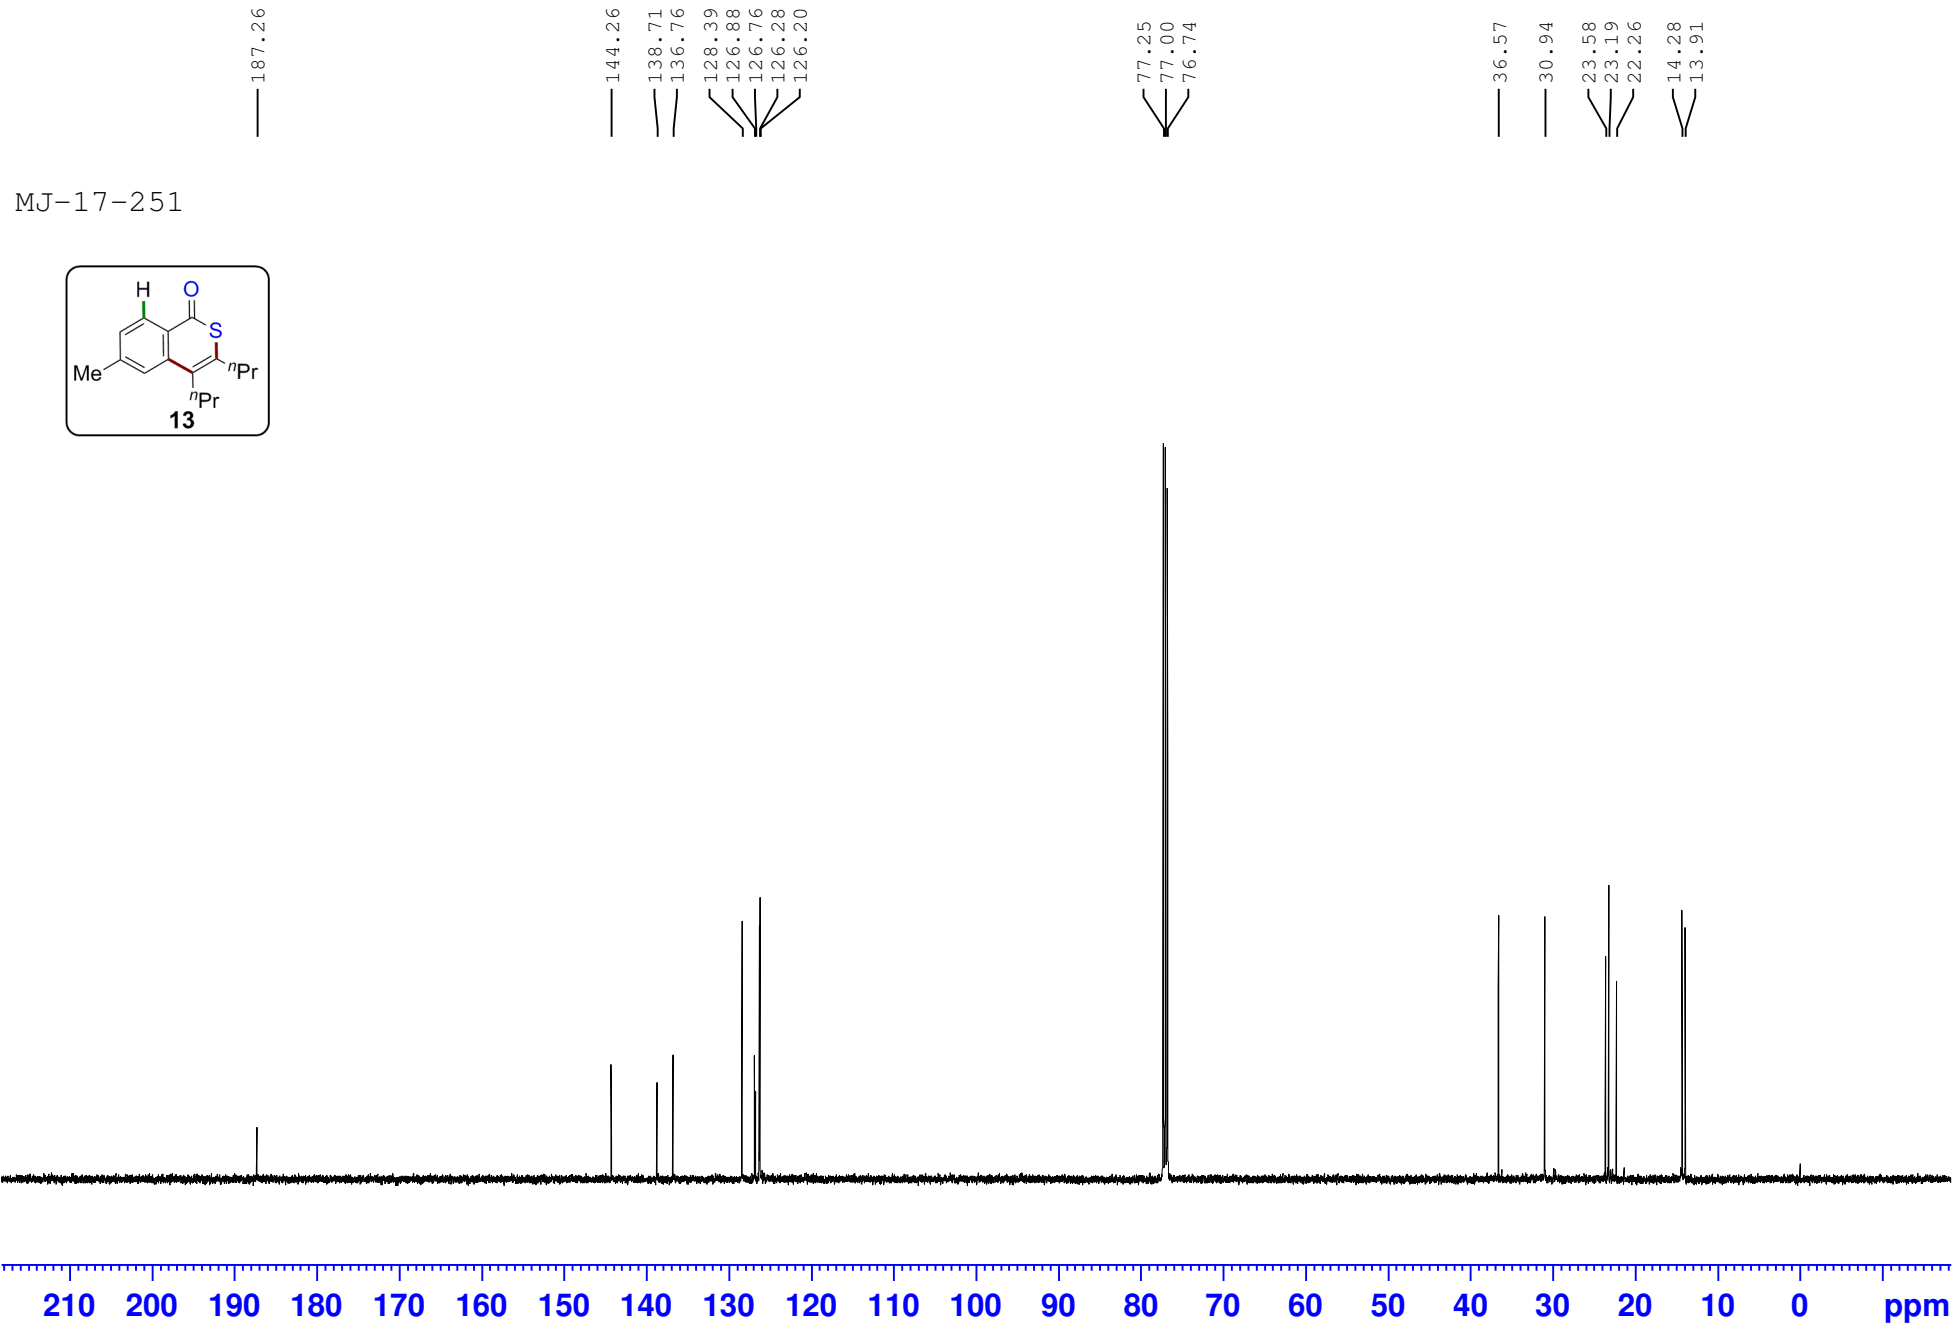

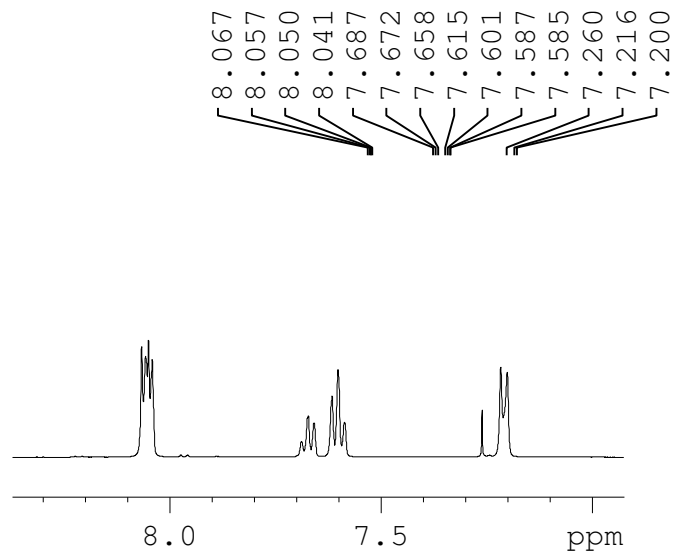

3.456  
2.396

MJ-16-166

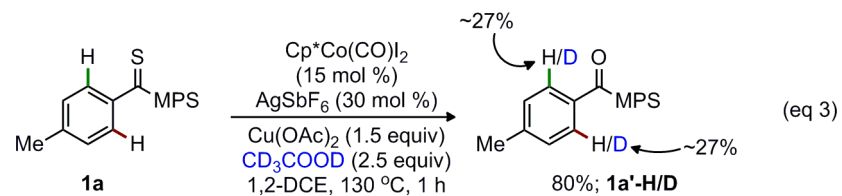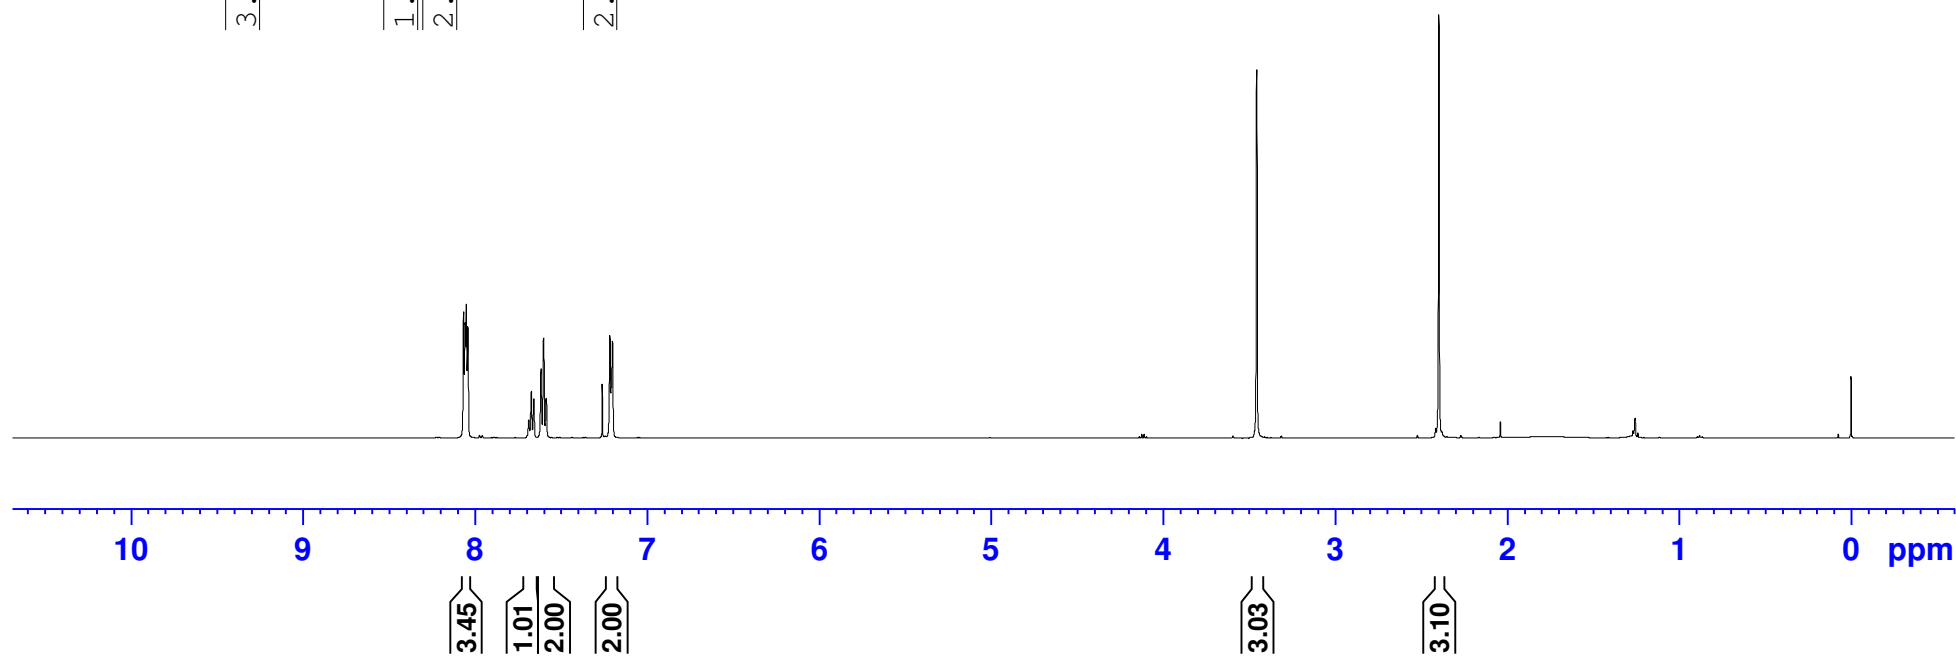

MJ-17-254

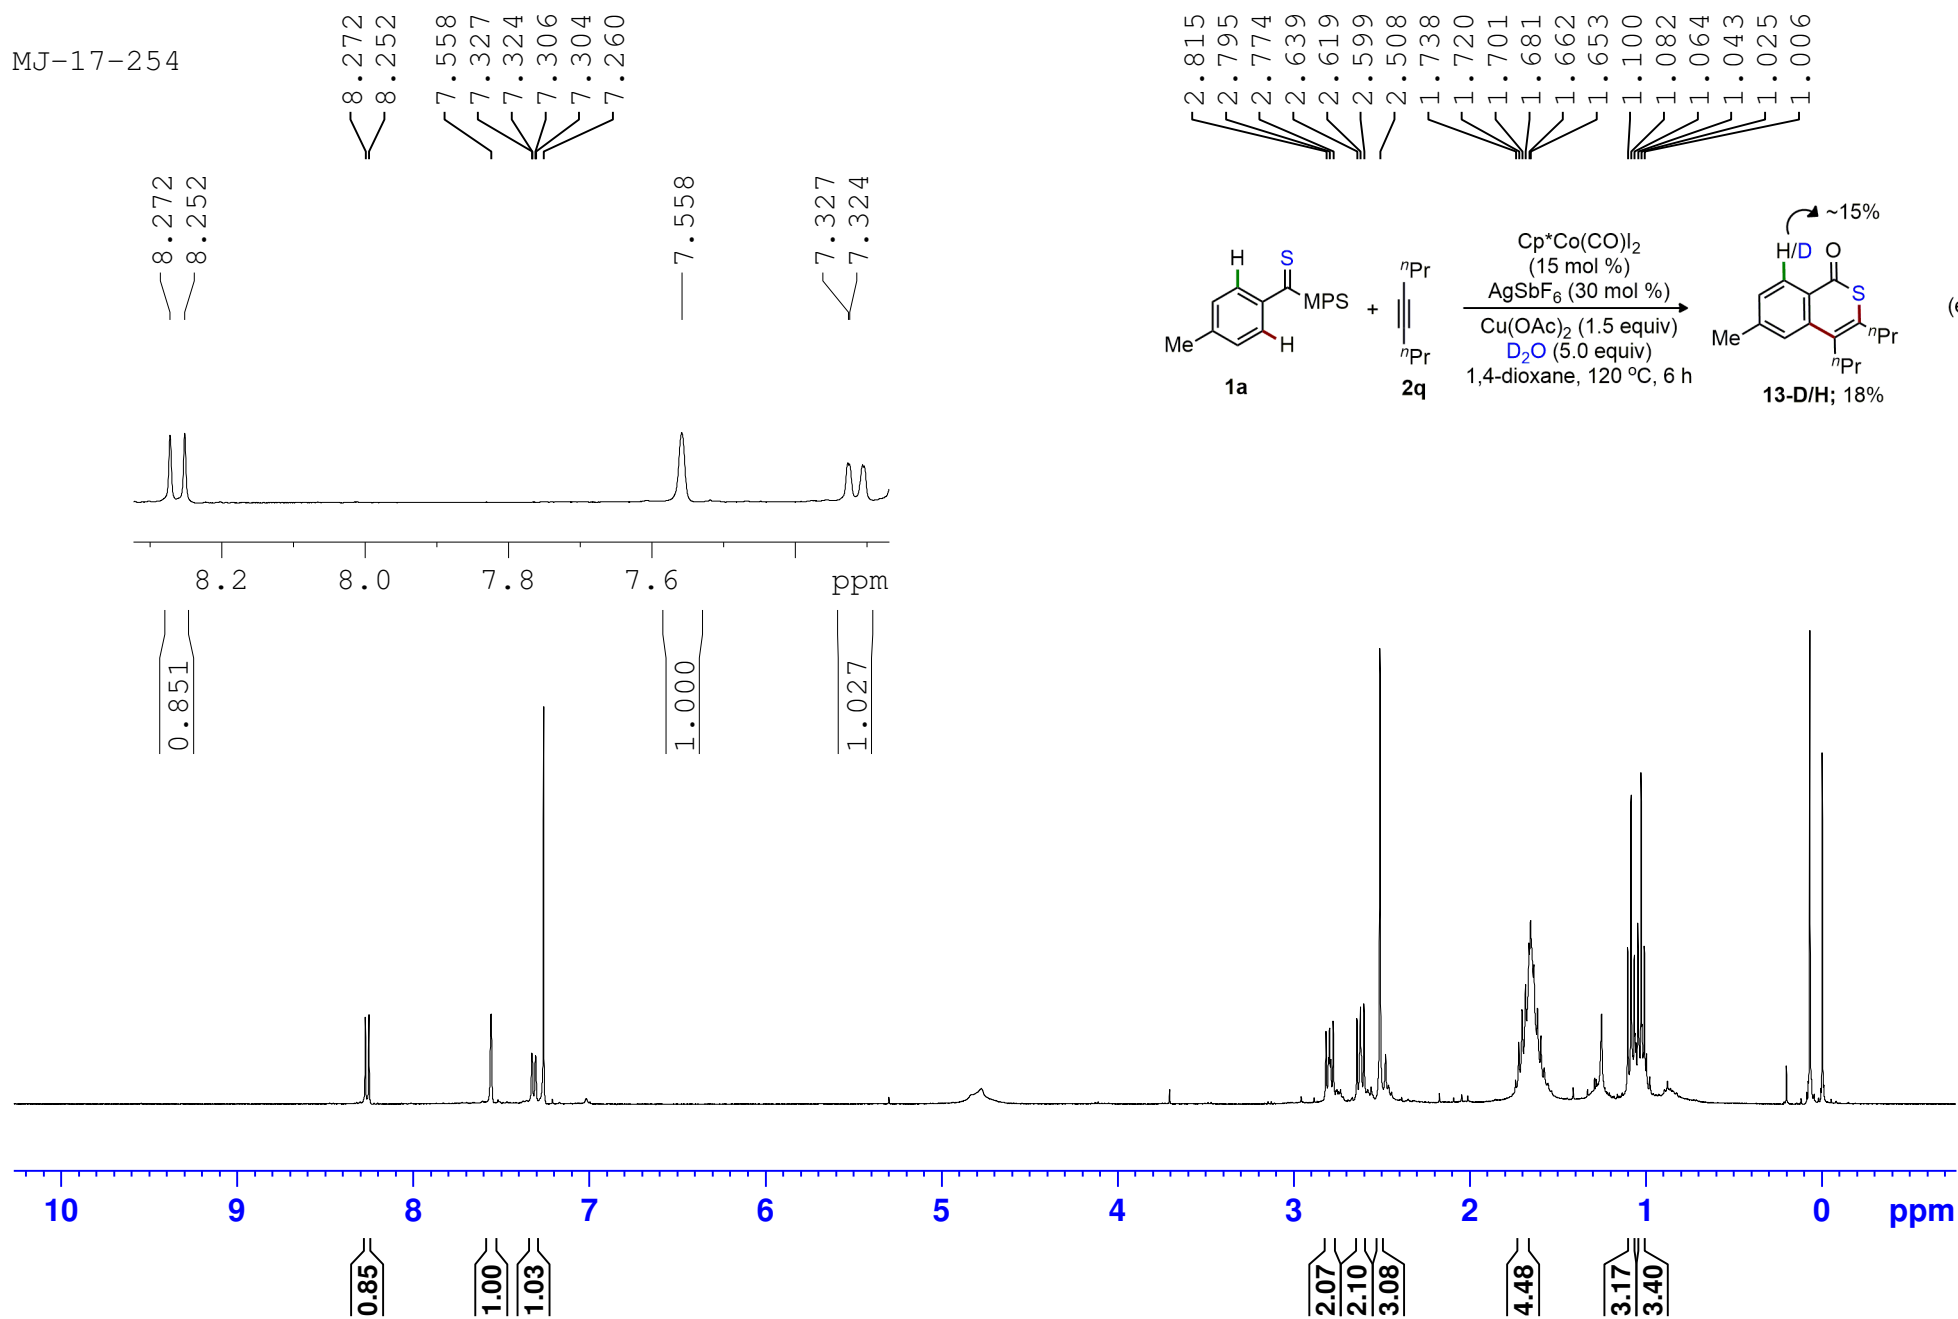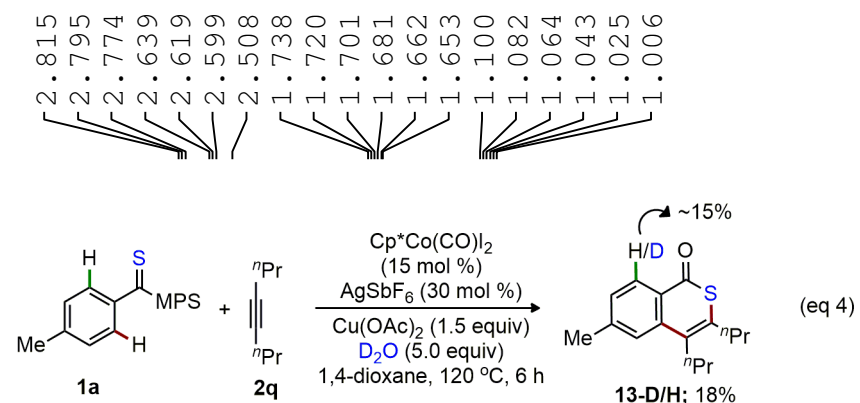

MJ-16-168

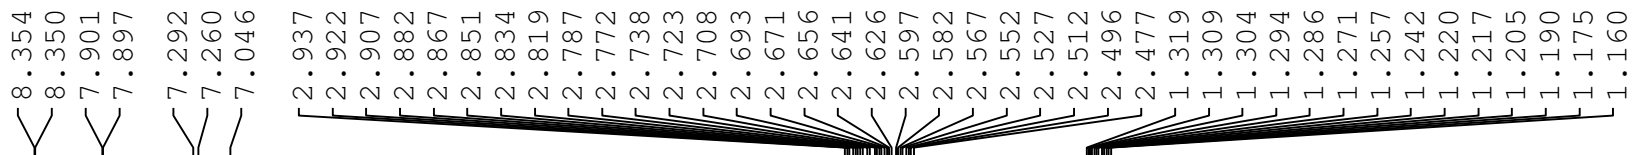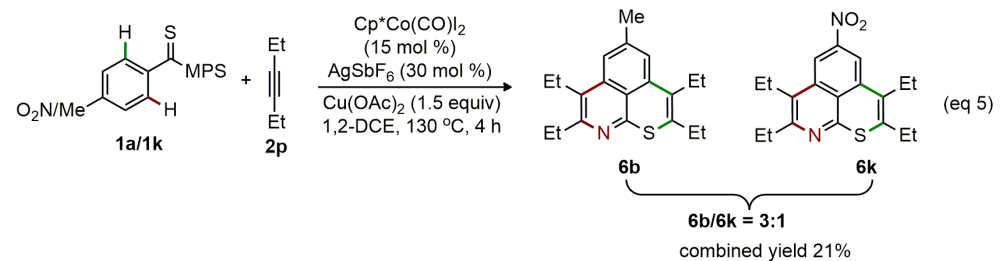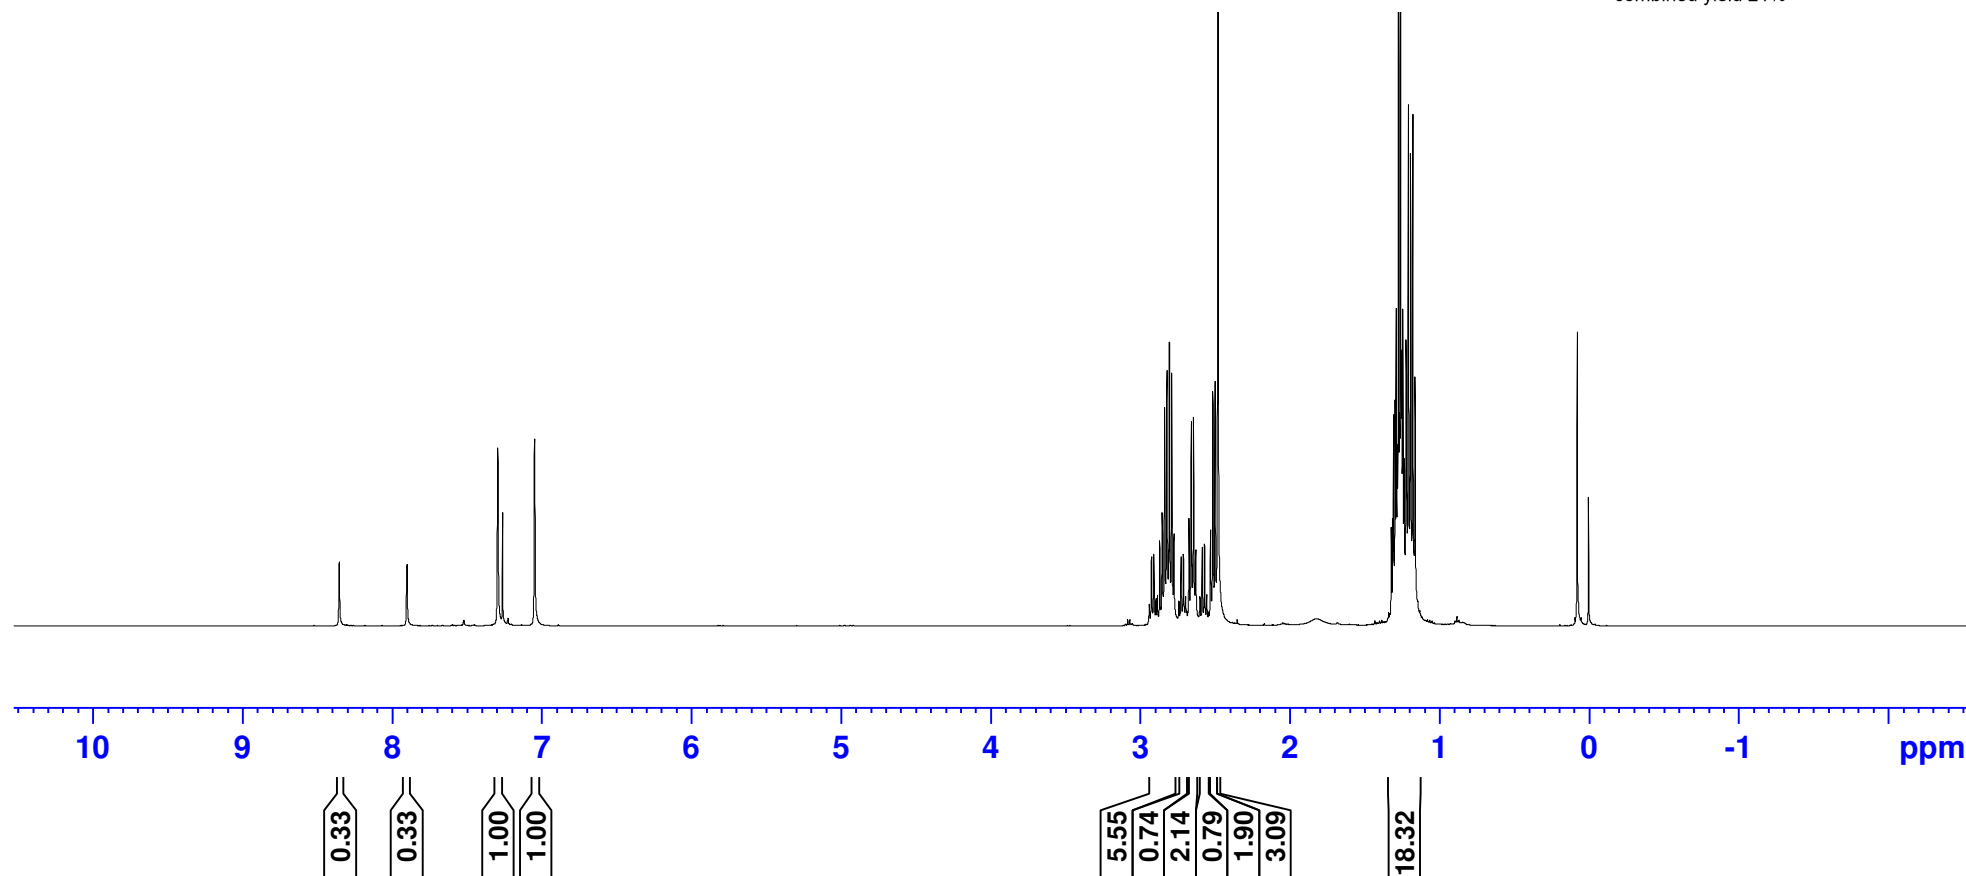

Supplement: d1sc00765c2.pdf [file d1sc00765c2.pdf]
